# Supplementary material for: Identifying Soybean Pod Borer (Leguminivora glycinivorella) Resistance QTLs and the Mechanism of Induced Defense Using Linkage Mapping and RNA-Seq Analysis
Source: Int J Mol Sci. 2022 Sep 18;23(18):10910. doi: 10.3390/ijms231810910 (PMC9504297; doi:10.3390/ijms231810910)
Supplement: Supplementary file 1 [file ijms-23-10910-s001.zip]

Archive with 8 entries (8 files):
- Illustrated with Figure S1-S7.pdf
- Table S1.xlsx
- Table S2.xlsx
- Table S3.xlsx
- Table S4.xlsx
- Table S5.xlsx
- Table S6.xlsx
- Table S7.xlsx
