# Supplementary material for: Identifying Soybean Pod Borer (Leguminivora glycinivorella) Resistance QTLs and the Mechanism of Induced Defense Using Linkage Mapping and RNA-Seq Analysis
Source: Int J Mol Sci. 2022 Sep 18;23(18):10910. doi: 10.3390/ijms231810910 (PMC9504297; doi:10.3390/ijms231810910)
Supplement: Supplementary file 1 [file ijms-23-10910-s001.zip › Table S1.xlsx]

## Sheet: Table S1
Table S1: Valid SNPs information
Reference base: reference genome Wm82.a2.v1
Minor allele frequency: calculated based on base profilesof 232 F2 and their parents
F001-F232: F2 offsprings
JY93/K6: parents
Marker	Chromosome	Physical position (bp)	Genetic position (cM)	Reference base	Minor allele frequency	F001	F002	F003	F004	F005	F006	F007	F008	F009	F010	F011	F012	F013	F014	F015	F016	F017	F018	F019	F020	F021	F022	F023	F024	F025	F026	F027	F028	F029	F030	F031	F032	F033	F034	F035	F036	F037	F038	F039	F040	F041	F042	F043	F044
Gm01_1748728	Gm01	1748728	0	C	0.32906	CC	CC	CC	CT	CT	TT	TT	CC	CC	CC	TT	CT	CT	CC	CT	CT	CT	TT	CT	CT	CC	CT	CC	TT	CT	CT	CC	CT	CC	CC	TT	CT	CT	CC	TT	CT	TT	CT	CT	CT	TT	CT	CT	CC
Gm01_29556149	Gm01	29556149	37.18	A	0.32906	AG	AG	AG	AA	AG	GG	AG	AA	GG	AA	GG	AA	AA	AG	GG	AG	AA	AG	AG	AA	AG	AG	AA	AA	GG	AG	AA	GG	AG	AA	AG	AG	GG	AG	AG	AA	AG	AG	GG	GG	AG	AA	GG	AA
Gm01_33164666	Gm01	33164666	37.4	C	0.32906	CT	CT	CT	CC	CT	TT	CT	CC	TT	CC	TT	CC	CC	CT	TT	CT	CC	CT	CT	CC	CT	CT	CC	CC	TT	CT	CC	TT	CT	CC	CT	CT	TT	CT	CT	CC	CT	CT	TT	TT	CT	CC	TT	CC
Gm01_33435329	Gm01	33435329	38.05	T	0.333333	TC	TC	TC	TT	TC	CC	TC	TT	CC	TT	CC	TT	TT	TC	CC	TC	TT	TC	TC	TT	TC	TC	TT	TT	CC	TC	TT	CC	TC	TT	TC	TC	CC	TC	TC	TT	TC	TC	CC	CC	TC	TT	CC	TT
Gm01_32744066	Gm01	32744066	39.14	A	0.324786	AG	AG	AG	AA	AG	GG	AG	AA	GG	AA	GG	AA	AA	AG	GG	AG	AA	AG	AG	AA	AG	AG	AA	AA	GG	AG	AA	GG	AG	AA	AG	AG	GG	AG	AG	AA	AG	AG	GG	GG	AG	AA	GG	AA
Gm01_33103456	Gm01	33103456	39.36	C	0.333333	CT	CT	CT	CC	CT	TT	CT	CC	TT	CC	TT	CC	CC	CT	TT	CT	CC	CT	CT	CC	CT	CT	CC	CC	TT	CT	CC	TT	CT	CC	CT	CT	TT	CT	CT	CC	CT	CT	TT	TT	CT	CC	TT	CC
Gm01_30059097	Gm01	30059097	40.01	C	0.333333	CA	CA	CA	CC	CA	AA	CA	CC	AA	CC	AA	CC	CC	CA	AA	CA	CC	CA	CA	CC	CA	CA	CC	CC	CA	CA	CC	AA	CA	CC	CA	CA	AA	CA	CA	CC	CA	CA	AA	AA	CA	CC	AA	CC
Gm01_29470751	Gm01	29470751	40.88	A	0.32906	AG	AG	AG	AA	AG	GG	AG	AA	GG	AA	GG	AA	AA	AG	GG	AG	AA	AG	AG	AA	AG	AG	AA	AA	GG	AG	AA	GG	AG	AA	AG	AG	GG	AG	AG	AA	AG	AG	GG	GG	AG	AA	GG	AA
Gm01_29135445	Gm01	29135445	41.09	G	0.32906	GT	GT	GT	GG	GT	TT	GT	GG	TT	GG	TT	GG	GG	GT	TT	GT	GG	GT	GT	GG	GT	GT	GG	GG	TT	GT	GG	TT	GT	GG	GT	GT	TT	GT	GT	GG	GT	GT	TT	TT	GT	GG	TT	GG
Gm01_27986675	Gm01	27986675	41.31	T	0.333333	TC	TT	TC	TT	TC	CC	TC	TT	CC	TT	CC	TT	TT	TC	CC	TC	TT	TC	TC	TT	TC	TC	TT	TT	CC	TC	TT	CC	TC	TT	TC	TC	CC	TC	TC	TT	TC	TC	CC	CC	TC	TT	CC	TT
Gm01_27563869	Gm01	27563869	41.74	G	0.337607	GA	GG	GA	GG	GA	AA	GA	GG	AA	GG	AA	GG	GG	GA	AA	GA	GG	GA	GA	GG	GA	GA	GG	GG	AA	GA	GG	AA	GA	GG	GA	GA	AA	GA	GA	GG	GA	GA	AA	AA	GA	GG	AA	GG
Gm01_27736135	Gm01	27736135	42.39	T	0.333333	TC	TT	TC	TT	TC	CC	TC	TT	CC	TT	CC	TT	TT	TC	CC	TC	TT	TC	TC	TT	TC	TC	TT	TT	CC	TC	TT	CC	TC	TT	TC	TC	CC	TC	TC	TT	TC	TC	CC	CC	TC	TT	CC	TT
Gm01_27563808	Gm01	27563808	42.82	A	0.333333	AC	AA	AC	AA	AC	CC	AC	AA	CC	AA	CC	AA	AA	AC	CC	AC	AA	AC	AC	AA	AC	AC	AA	AA	CC	AC	AA	CC	AC	AA	AC	AC	CC	AC	AC	AA	AC	AC	CC	CC	AC	AA	CC	AA
Gm01_27299576	Gm01	27299576	43.26	G	0.320513	GA	GG	GA	GG	GA	AA	GA	GG	AA	GG	AA	GG	GG	GA	AA	GA	GG	GA	GA	GG	GA	GA	GG	GG	AA	GA	GG	AA	GA	GG	GA	GA	AA	GA	GA	GG	GA	GA	AA	AA	GA	GG	AA	GG
Gm01_27087574	Gm01	27087574	43.69	A	0.311966	AG	AA	AG	AA	AG	GG	AG	AA	GG	AA	GG	AA	AA	AG	GG	AG	AA	AG	AG	AA	AG	AG	AA	AA	GG	AG	AA	GG	AG	AA	AG	AG	GG	AG	AG	AA	AG	AG	GG	GG	AG	AG	GG	AA
Gm01_17413412	Gm01	17413412	46.77	G	0.32906	GA	GG	GA	GA	GA	AA	GA	GG	AA	GG	AA	GG	GG	GA	AA	GA	GG	GA	GA	GG	GA	GA	GG	GG	AA	GA	GG	AA	GA	GG	GA	GA	AA	GA	GA	GG	GA	GA	AA	AA	GA	GA	AA	GG
Gm01_21011580	Gm01	21011580	54.02	G	0.247863	GA	GG	GA	GA	GA	AA	GA	AA	AA	GG	AA	GG	GG	GA	AA	GA	GG	GA	GA	GG	GA	GA	GG	GG	AA	GA	GG	AA	GA	GA	GA	GA	AA	GA	GA	GG	GA	GA	AA	AA	GA	GA	AA	AA
Gm01_17268681	Gm01	17268681	54.46	T	0.247863	TC	TT	TC	TC	TC	CC	TC	CC	CC	TT	CC	TT	TT	TC	CC	TC	TT	TC	TC	TT	TC	TC	TT	TT	CC	TC	TT	CC	TC	TC	TC	TC	CC	TC	TC	TT	TC	TC	CC	CC	TC	TC	CC	CC
Gm01_13741980	Gm01	13741980	54.89	A	0.252137	AG	AA	AG	AG	AG	GG	AG	GG	GG	AA	GG	AA	AA	AG	GG	AG	AA	AG	AG	AA	AG	AG	AA	AA	GG	AG	AA	GG	AG	AG	AG	AG	GG	AG	AG	AA	AG	AG	GG	GG	AG	AG	GG	GG
Gm01_11208412	Gm01	11208412	55.11	C	0.252137	CT	CC	CT	CT	CT	TT	CT	TT	TT	CC	TT	CC	CC	CT	TT	CT	CC	CT	CT	CC	CT	CT	CC	CC	TT	CT	CC	TT	CT	CT	CT	CT	TT	CT	CT	CC	CT	CT	TT	TT	CT	CT	TT	TT
Gm01_12470083	Gm01	12470083	55.76	T	0.25641	TC	TT	TC	TC	TC	CC	TC	CC	CC	TT	CC	TT	TT	TC	CC	TC	TT	TC	TC	TT	TC	TC	TT	TT	CC	TC	TT	CC	TC	TC	TC	TC	CC	TC	TC	TT	TC	TC	CC	CC	TC	TC	CC	CC
Gm01_22697160	Gm01	22697160	56.63	A	0.25641	AG	AA	AG	AG	AG	GG	AG	GG	GG	AA	GG	AA	AA	AG	GG	AG	AA	AG	AG	AA	AG	AG	AA	AA	GG	AG	AA	GG	AG	AG	AG	AG	GG	AG	AG	AA	AG	AG	GG	GG	AG	AG	GG	GG
Gm01_26828486	Gm01	26828486	58.16	T	0.25641	TC	TT	TC	TT	TC	CC	TC	CC	CC	TT	CC	TT	TT	TC	CC	TC	TT	TC	TC	TT	TC	TC	TT	TT	CC	TC	TT	CC	TC	TC	TC	TC	CC	TC	TC	TT	TC	TC	CC	CC	TC	TC	CC	CC
Gm01_25928596	Gm01	25928596	59.47	G	0.247863	GT	GG	GT	GT	GT	TT	GT	TT	TT	GG	TT	GG	GG	GT	TT	GT	GG	GT	GT	GG	GT	GT	GG	GG	TT	GT	GG	TT	GT	GT	GT	GT	TT	GT	GT	GG	GT	GT	TT	TT	GT	GT	TT	TT
Gm01_24552637	Gm01	24552637	59.9	A	0.252137	AT	AA	AT	AT	AT	TT	AT	TT	TT	AA	TT	AA	AA	AT	TT	AT	AA	AT	AT	AA	AT	AT	AA	AA	TT	AT	AA	TT	AT	AT	AT	AT	TT	AT	AT	AA	AT	AT	TT	TT	AT	AT	TT	TT
Gm01_25978506	Gm01	25978506	62.32	C	0.260684	CG	CC	CG	CG	CG	GG	CC	GG	GG	CC	GG	CC	CC	CC	GG	CG	CC	CG	CG	CC	CG	CG	CC	CC	GG	CG	CC	GG	CG	CG	CG	CG	GG	CG	CG	CC	CG	CG	GG	GG	CG	CG	GG	GG
Gm01_42152888	Gm01	42152888	70.54	A	0.299145	AT	AT	AT	TT	AT	AA	AA	AA	AA	TT	AA	TT	TT	AT	AA	AT	TT	AT	AT	TT	AT	AT	TT	TT	AA	AT	TT	AA	TT	AT	AT	AT	AA	AT	AT	TT	AA	AT	AA	AA	AT	TT	AA	AA
Gm01_42152889	Gm01	42152889	70.75	A	0.303419	AT	AT	AT	TT	AT	AA	AA	AA	AA	TT	AA	TT	TT	AT	AA	AT	TT	AT	AT	TT	AT	AT	TT	TT	AA	AT	TT	AA	TT	AT	AT	AT	AA	AT	AT	TT	AA	AT	AA	AA	AT	TT	AA	AA
Gm01_42152890	Gm01	42152890	71.4	A	0.299145	AT	AT	AT	TT	AT	AA	AA	AA	AA	TT	AA	TT	TT	AT	AA	AT	TT	AT	AT	TT	AT	AT	TT	TT	AA	AT	TT	AA	TT	AT	AT	AT	AA	AT	AT	TT	AA	AT	AA	AA	AT	TT	AA	AA
Gm01_42849540	Gm01	42849540	73.37	T	0.282051	TC	TC	TC	CC	TC	TT	TC	TT	TT	CC	TT	CC	CC	TC	TT	TC	CC	TC	TC	CC	TC	TC	CC	CC	TT	TC	CC	TT	CC	TC	TC	TC	TT	TC	TC	CC	TT	TC	TT	TT	TC	CC	TT	TT
Gm01_39685439	Gm01	39685439	73.8	A	0.282051	AT	AT	AT	TT	AT	AA	AT	AA	AA	TT	AA	TT	TT	AT	AA	AT	TT	AT	AT	TT	AT	AT	TT	TT	AA	AT	TT	AA	TT	AT	AT	AT	AA	AT	AT	TT	AA	AT	AA	AA	AT	TT	AA	AA
Gm01_39685478	Gm01	39685478	74.02	T	0.286325	TC	TC	TC	CC	TC	TT	TC	TT	TT	CC	TT	CC	CC	TC	TT	TC	CC	TC	TC	CC	TC	TC	CC	CC	TT	TC	CC	TT	CC	TC	TC	TC	TT	TC	TC	CC	TT	TC	TT	TT	TC	CC	TT	TT
Gm01_43239702	Gm01	43239702	74.89	A	0.294872	AG	AG	AG	GG	AG	AA	AG	AA	AA	GG	AA	GG	GG	AG	AA	AG	GG	AG	AG	GG	AA	AG	GG	GG	AA	AG	GG	AA	GG	AG	AG	AG	AA	AG	AG	GG	AA	AG	AA	AA	AG	GG	AA	AA
Gm01_43239711	Gm01	43239711	75.76	T	0.311966	TC	TC	TC	CC	TC	TT	TC	TT	TT	CC	TT	CC	CC	TC	TT	TC	CC	TC	TC	CC	TT	TC	CC	CC	TT	TC	CC	TT	CC	TC	TC	TC	TT	TC	TC	CC	TT	TC	TT	TT	TC	CC	TT	TT
Gm01_43239692	Gm01	43239692	76.85	T	0.290598	TC	TC	TC	CC	TC	TT	TC	TT	TT	CC	TT	CC	CC	TC	TT	TC	CC	TC	TC	CC	TT	TC	CC	CC	TT	TC	CC	TT	CC	TC	TC	TC	TT	TC	TC	CC	TT	TC	TT	TT	TC	CC	TT	TT
Gm01_41804095	Gm01	41804095	79.26	C	0.32906	CC	CT	CT	TT	CC	CC	CT	CC	CC	TT	CC	TT	TT	CT	CC	CT	TT	CT	CC	TT	CC	CT	TT	TT	CC	CT	TT	CC	TT	CT	CT	CT	CC	CT	CT	TT	CC	CT	CC	CC	CC	TT	CC	CC
Gm01_42543396	Gm01	42543396	81.89	G	0.282051	GC	GC	GC	CC	GC	GG	GC	GG	GG	CC	GG	CC	CC	GC	GG	GC	CC	GC	GC	CC	GG	GC	CC	CC	GG	GC	CC	GG	CC	GC	GC	GC	GG	GC	GC	CC	GG	GC	GG	GG	GC	CC	GG	GG
Gm01_42543381	Gm01	42543381	82.11	G	0.286325	GC	GC	GC	CC	GC	GG	GC	GG	GG	CC	GG	CC	CC	GC	GG	GC	CC	GC	GC	CC	GG	GC	CC	CC	GG	GC	CC	GG	CC	GC	GC	GC	GG	GC	GC	CC	GG	GC	GG	GG	GC	CC	GG	GG
Gm01_42543435	Gm01	42543435	82.76	T	0.282051	TC	TC	TC	CC	TC	TT	TC	TT	TT	CC	TT	CC	CC	TC	TT	TC	CC	TC	TC	CC	TC	TC	CC	CC	TT	TC	CC	TT	CC	TC	TC	TC	TT	TC	TC	CC	TT	TC	TT	TT	TC	CC	TT	TT
Gm01_43239603	Gm01	43239603	83.85	C	0.290598	CA	CA	CA	AA	CA	CC	CA	CC	CC	AA	CC	AA	AA	CA	CC	CA	AA	CA	CA	AA	CA	CA	AA	AA	CC	CA	AA	CC	AA	CA	CA	CA	CC	CA	CA	AA	CC	CA	CC	CC	CA	AA	CC	CC
Gm01_43239625	Gm01	43239625	84.28	T	0.290598	TC	TC	TC	CC	TC	TT	TC	TT	TT	CC	TT	CC	CC	TC	TT	TC	CC	TC	TC	CC	TC	TC	CC	CC	TT	TC	CC	TT	CC	TC	TC	TC	TT	TC	TC	CC	TT	TC	TT	TT	TC	CC	TT	TT
Gm01_41998775	Gm01	41998775	84.93	T	0.286325	TA	TA	TA	AA	TA	TT	TA	TT	TT	AA	TT	AA	AA	TA	TT	TA	AA	TA	TA	AA	TA	TA	AA	AA	TT	TA	AA	TT	AA	TA	TT	TA	TT	TA	TA	AA	TT	TA	TT	TT	TA	AA	TT	TT
Gm01_41998789	Gm01	41998789	85.15	A	0.290598	AC	AC	AC	CC	AC	AA	AC	AA	AA	CC	AA	CC	CC	AC	AA	AC	CC	AC	AC	CC	AC	AC	CC	CC	AA	AC	CC	AA	CC	AC	AA	AC	AA	AC	AC	CC	AA	AC	AA	AA	AC	CC	AA	AA
Gm01_42416384	Gm01	42416384	85.8	T	0.286325	TA	TA	TA	AA	TA	TT	TA	TT	TT	AA	TT	AA	AA	TT	TT	TA	AA	TA	TA	AA	TA	TA	AA	AA	TT	TA	AA	TT	AA	TA	TT	TA	TT	TA	TA	AA	TT	TA	TT	TT	TA	AA	TT	TT
Gm01_39843671	Gm01	39843671	86.23	G	0.282051	GA	GA	GA	AA	GA	GG	GA	GG	GG	AA	GG	AA	AA	GA	GG	GA	AA	GA	GA	AA	GA	GA	AA	AA	GG	GA	AA	GG	AA	GA	GA	GA	GG	GA	GA	AA	GG	GA	GG	GG	GA	AA	GG	GG
Gm01_41975360	Gm01	41975360	87.33	C	0.294872	CT	CT	CT	TT	CT	CC	CT	CC	CC	TT	CC	TT	TT	CT	CC	CC	TT	CT	CT	TT	TT	CT	TT	TT	CC	CT	TT	CC	TT	CT	CT	CT	CC	CT	CT	TT	CC	CT	CC	CC	CT	TT	CC	CC
Gm01_43987564	Gm01	43987564	89.09	A	0.294872	AG	AG	AG	GG	AG	AA	AG	AA	AA	GG	AA	GG	GG	AG	AA	AA	GG	AG	AG	GG	AG	AG	GG	GG	AA	AG	GG	AA	GG	AG	AG	AG	AA	AG	AG	GG	AA	AG	AA	AA	AG	GG	AA	AA
Gm01_43987548	Gm01	43987548	89.74	C	0.282051	CG	CG	CG	GG	CG	CC	CG	CC	CC	GG	CC	GG	GG	CG	CC	CG	GG	CG	CG	GG	CG	CG	GG	GG	CC	CG	GG	CC	GG	CG	CG	CG	CC	CG	CG	GG	CC	CG	CC	CC	CG	GG	CC	CC
Gm01_44125506	Gm01	44125506	91.27	A	0.286325	AG	AG	AG	GG	AG	AA	AG	AA	AA	GG	AA	GG	GG	AG	AA	AG	GG	AG	AG	GG	AG	AG	GG	GG	AA	AG	GG	AA	GG	AG	AG	AG	AA	AG	AG	GG	AA	AG	AA	AA	AG	GG	AA	AA
Gm01_44125544	Gm01	44125544	91.48	T	0.290598	TC	TC	TC	CC	TC	TT	TC	TT	TT	CC	TT	CC	CC	TC	TT	TC	CC	TC	TC	CC	TC	TC	CC	CC	TT	TC	CC	TT	CC	TC	TC	TC	TT	TC	TC	CC	TT	TC	TT	TT	TC	CC	TT	TT
Gm01_44125584	Gm01	44125584	92.14	G	0.282051	GA	GA	GA	AA	GA	GG	GA	GG	GG	AA	GG	AA	AA	GA	GG	GA	GA	GA	GA	AA	GA	GA	AA	AA	GG	GA	AA	GG	AA	GA	GA	GA	GG	GA	GA	AA	GG	GA	GG	GG	GA	AA	GG	GG
Gm01_44125615	Gm01	44125615	92.57	C	0.286325	CT	CT	CT	TT	CT	CC	CT	CC	CC	TT	CC	TT	TT	CT	CC	CT	TT	CT	CT	TT	CT	CT	TT	TT	CC	CT	TT	CC	TT	CT	CT	CC	CC	CT	CT	TT	CC	CT	CC	CC	CT	TT	CC	CC
Gm01_44125599	Gm01	44125599	93.23	A	0.294872	AG	AG	AG	GG	AG	AA	AG	AA	AA	GG	AA	GG	GG	AG	AA	AG	GG	AG	AG	GG	AG	AG	GG	GG	AA	AG	GG	AA	GG	AG	AG	AA	AA	AG	AG	GG	AA	AG	AA	AA	AG	GG	AA	AA
Gm01_44164332	Gm01	44164332	94.32	T	0.286325	TC	TC	TC	CC	TC	TT	TC	TT	TT	CC	TT	CC	CC	TC	TT	TC	CC	TC	TC	CC	TC	TC	CC	CC	TT	TC	CC	TT	CC	TC	TC	TC	TT	TC	TC	CC	TT	TC	TT	TT	TC	CC	TT	TT
Gm01_44365875	Gm01	44365875	94.97	A	0.290598	AG	AG	AG	GG	AG	AA	GG	AA	AA	GG	AA	GG	GG	AG	AA	AG	GG	AG	AG	GG	AG	AG	GG	GG	AA	AG	GG	AA	GG	AG	AG	AG	AA	AG	AG	GG	AA	AG	AA	AA	AG	GG	AA	AA
Gm01_44706250	Gm01	44706250	96.06	G	0.290598	GA	GA	GA	AA	GA	GG	GA	GG	GG	AA	GG	AA	AA	GA	GG	GA	AA	GA	GA	AA	GA	GA	AA	AA	GG	GA	AA	GG	AA	GA	GA	GA	GG	GA	GA	AA	GG	GA	GG	GG	GA	AA	GG	GG
Gm01_45067143	Gm01	45067143	96.28	A	0.294872	AG	AG	AG	GG	AG	AA	AG	AA	AA	GG	AA	GG	GG	AG	AA	AG	GG	AG	AG	GG	AG	AG	GG	GG	AA	AG	GG	AA	GG	AG	AG	AG	AA	AG	AG	GG	AA	AG	AA	AA	AG	GG	AA	AA
Gm01_45067158	Gm01	45067158	96.71	T	0.303419	TC	TC	TC	CC	TC	TT	TC	TT	TT	CC	TT	CC	CC	TC	TT	TC	CC	TC	TC	CC	TC	TC	CC	CC	TT	TC	CC	TT	CC	TC	TC	TC	TT	TT	TC	CC	TT	TC	TT	TT	TC	CC	TT	TT
Gm01_44839053	Gm01	44839053	97.58	C	0.290598	CT	CT	CT	TT	CT	CC	CT	CC	CC	TT	CC	TT	TT	CT	CC	CT	TT	CT	CT	TT	CT	CT	TT	TT	CC	CT	TT	CC	TT	CT	CT	CT	CC	CT	CT	TT	CC	CT	CC	CC	CT	TT	CC	CC
Gm01_47948391	Gm01	47948391	102.24	G	0.277778	GA	GA	GA	AA	GA	GG	GA	GG	GG	AA	GA	AA	AA	GA	GA	GA	AA	GA	GA	AA	AA	GA	AA	AA	GG	GA	AA	GA	AA	GA	GA	GA	GG	GA	GG	AA	GG	GA	GG	GG	GA	AA	GG	GG
Gm01_48084073	Gm01	48084073	102.46	G	0.273504	GA	GA	GA	AA	GA	GG	GA	GG	GG	AA	GA	AA	AA	GA	GA	GA	AA	GA	GA	AA	AA	GA	AA	AA	GA	GA	AA	GA	AA	GA	GA	GA	GG	GA	GG	AA	GG	GA	GG	GG	GA	AA	GG	GG
Gm01_54749227	Gm01	54749227	154.08	T	0.277778	TT	GG	TG	TT	TG	TG	TG	GG	TT	TG	TG	TG	TG	TT	TT	TT	TT	TG	TG	TG	TG	TG	TG	TT	TT	TT	GG	TT	TT	TT	TG	TG	GG	TG	TG	TG	TG	TG	TG	TG	GG	TG	TG	GG
Gm01_54896170	Gm01	54896170	154.73	T	0.273504	TT	CC	TC	TT	TC	TC	TC	CC	TT	TC	TC	TC	TC	TT	TT	TT	TT	TC	TC	TC	TC	TC	TC	TT	TT	TT	CC	TT	TT	TT	TC	TC	CC	TC	TC	TC	TT	TC	TC	TC	CC	TC	TC	CC
Gm01_55037781	Gm01	55037781	155.17	C	0.264957	CC	TT	CT	CC	CT	CT	CT	TT	CC	CT	CT	CT	CT	CC	CC	CC	CT	CT	CT	CT	CT	CT	CT	CC	CC	CC	TT	CC	CC	CC	CT	CT	TT	CT	CT	CT	CC	CT	CT	CT	TT	CT	CT	TT
Gm01_55181759	Gm01	55181759	155.38	C	0.273504	CC	TT	CT	CC	CT	CT	CT	TT	CC	CT	CT	CT	CT	CC	CC	CC	CT	CT	CT	CT	CT	CT	CT	CC	CC	CC	TT	CC	CC	CC	CT	CT	TT	CT	CT	CT	CC	CT	CT	CT	TT	CT	CT	TT
Gm01_55218415	Gm01	55218415	155.82	C	0.264957	CC	AA	CA	CA	CA	CA	CA	AA	CC	CA	CA	CA	CA	CC	CC	CC	CA	CA	CA	CA	CA	CA	CA	CC	CC	CC	AA	CC	CC	CC	CA	CA	AA	CA	CA	CA	CC	CA	CA	CA	AA	CA	CA	AA
Gm01_55342074	Gm01	55342074	156.47	A	0.264957	AA	CC	AC	AC	AC	AC	AC	CC	AA	AC	AC	AC	AC	AA	AA	AA	AC	AC	AC	AC	AC	AC	AC	AA	AA	AA	CC	AA	AA	AA	AC	AC	CC	AC	AA	AC	AA	AC	AC	AC	CC	AC	AC	CC
Gm01_55427568	Gm01	55427568	156.9	T	0.269231	TT	AA	TA	TA	TA	TA	TA	AA	TT	TA	TA	TA	TA	TT	TT	TT	TA	TA	TA	TA	TA	TA	TA	TT	TT	TT	AA	TT	TT	TT	TA	TA	AA	TA	TT	TA	TT	TA	TA	TA	AA	TA	TA	AA
Gm01_55673060	Gm01	55673060	158.87	C	0.294872	CC	TT	CT	CT	CT	CT	CT	TT	CC	CT	CT	CT	CT	CC	CC	CC	CT	CT	CT	CT	CT	CT	CT	CC	CC	CC	TT	CC	CC	CC	CT	CT	TT	CT	CC	CT	CC	CT	CT	CT	TT	CT	CT	TT
Gm02_47909337	Gm02	47909337	0	G	0.282051	GG	GG	GA	AA	GA	GA	GA	AA	GA	GA	AA	GA	GG	GA	GA	GA	GG	GA	GA	AA	GA	GG	GG	GA	GA	GA	GA	GA	AA	GG	AA	GA	AA	GG	AA	GG	AA	GG	GA	GA	GA	GA	GG	GA
Gm02_47689249	Gm02	47689249	1.08	G	0.286325	GG	GG	GA	AA	GA	GA	GA	AA	GA	GA	AA	GA	GG	GA	GA	GA	GG	GA	GA	AA	GA	GG	GA	GA	GA	GA	GA	GA	AA	GG	AA	GA	AA	GG	AA	GG	AA	GG	GA	GA	GA	GA	GG	GA
Gm02_47363415	Gm02	47363415	2.39	A	0.286325	AA	AA	AG	GG	AG	AG	AG	GG	AG	AG	GG	AG	AA	AG	AG	AG	AA	AG	AG	GG	AG	AA	AG	AG	AG	AG	AG	AG	GG	AA	GG	AG	GG	AA	GG	AA	GG	AA	AG	AG	AG	AG	AA	AG
Gm02_47254486	Gm02	47254486	2.82	C	0.294872	GG	GG	CG	CC	CG	CG	CG	CC	CG	CG	CC	CG	GG	CG	CG	CG	GG	CG	CG	CC	CG	GG	CG	CG	CG	CG	CG	CG	CC	GG	CC	CG	CC	GG	CC	GG	CC	GG	CG	CG	CG	CG	GG	CG
Gm02_47207267	Gm02	47207267	3.69	T	0.282051	CC	CC	TC	TT	TC	TC	TC	TC	TC	TC	TT	TC	CC	TC	TC	TC	CC	TC	TC	TT	TC	CC	TC	TC	TC	TC	TC	TC	TT	CC	TT	TC	TT	CC	TT	CC	TT	CC	TC	TC	TC	TC	CC	TC
Gm02_47118111	Gm02	47118111	4.13	T	0.282051	AA	AA	TA	TT	TA	TA	TA	TA	TA	TA	TT	TA	AA	TA	TA	TA	AA	TA	TA	TT	TA	AA	TA	TA	TA	TA	TA	TA	TT	AA	TT	TA	TT	AA	TT	AA	TT	AA	TA	TA	TA	TA	AA	TA
Gm02_47118160	Gm02	47118160	4.35	G	0.286325	AA	AA	GA	GG	GA	GA	GA	GA	GA	GA	GG	GA	AA	GA	GA	GA	AA	GA	GA	GG	GA	AA	GA	GA	GA	GA	GA	GA	GG	AA	GG	GA	GG	AA	GG	AA	GG	AA	GA	GA	GA	GA	AA	GA
Gm02_47035382	Gm02	47035382	4.78	C	0.286325	GG	GG	CG	CC	CG	CG	CG	CG	CG	CG	CC	CC	GG	CG	CG	CG	GG	CG	CG	CC	CG	GG	CG	CG	CG	CG	CG	CG	CC	GG	CC	CG	CC	GG	CC	GG	CC	GG	CG	CG	CG	CG	GG	CG
Gm02_46648559	Gm02	46648559	6.75	A	0.294872	AA	AA	AT	TT	AT	AT	AT	AT	AT	AT	TT	TT	AA	AT	AT	AT	AA	AT	AT	TT	AT	AA	AT	AT	AT	AT	AT	AT	TT	AA	TT	AT	TT	AA	TT	AA	TT	AA	AT	AT	AT	AT	AA	AT
Gm02_45984772	Gm02	45984772	12.1	C	0.286325	CC	CC	CT	TT	CT	CT	CT	CT	CT	TT	TT	TT	CC	CT	CT	CT	CC	CT	CT	TT	CT	CC	CT	CT	CT	CT	CT	CT	TT	CC	TT	CT	CT	CC	TT	CC	TT	CT	CT	CC	CT	CT	CC	CT
Gm02_45569633	Gm02	45569633	17.92	T	0.303419	CC	CC	TC	TT	TC	TC	TC	TC	CC	TT	TC	TT	CC	TC	TC	TC	CC	TC	TC	TT	TC	TC	TC	TC	TC	TC	TC	TC	TT	TC	TT	TT	TC	CC	TT	CC	TT	TC	TC	CC	TC	TC	CC	TC
Gm02_45509760	Gm02	45509760	19.45	T	0.299145	CC	CC	TC	TT	TC	TC	TC	TC	CC	TT	TC	TT	CC	TC	TC	TC	CC	TC	TC	TT	TC	TC	TC	TC	TC	TC	TC	TC	TT	CC	TT	TT	TC	CC	TT	CC	TT	TC	TC	CC	TC	TC	CC	TC
Gm02_44384928	Gm02	44384928	28.54	G	0.320513	AA	AA	GA	GG	GA	GG	GA	GA	AA	GG	GA	GG	AA	GA	GA		AA	GA	GA	GG	GA	GG	GA	GA	GA	GG	GA	GA	GG	AA	GG	GG	GA	AA	GA	AA	GG	GG	AA	GA	GA	AA	AA	GA
Gm02_44156289	Gm02	44156289	31.22	G	0.299145	GG	GG	GA	AA	GA	AA	GA	GA	GG	AA	GA	AA	GG	GA	GA	GA	GG	GA	GA	AA	GA	AA	GA	GA	GA	GA	GA	GA	AA	GG	AA	AA	GA	GG	GG	GG	AA	GA	GG	GA	GA	GG	GG	GA
Gm02_44077712	Gm02	44077712	32.53	C	0.307692	TT	TT	CT	CC	CT	CC	CT	TT	TT	CC	CT	CC	TT	CT	CT	CT	TT	CT	CT	CC	CT	CC	CT	CT	CT	CT	CT	CT	CC	TT	CC	CC	CT	TT	TT	TT	CC	CT	TT	CT	CT	TT	TT	CT
Gm02_44077753	Gm02	44077753	32.75	T	0.311966	CC	CC	TC	TT	TC	TT	TC	CC	CC	TT	TC	TT	CC	TC	TC	TC	CC	TC	TC	TT	TC	TT	TC	TC	TC	TC	TC	TC	TT	CC	TT	TT	TC	CC	CC	CC	TT	TC	CC	TC	TC	CC	CC	TC
Gm02_41445392	Gm02	41445392	53.66	T	0.277778	TT	TG	TG	TG	TT	TG	GG	TT	TG	GG	TG	GG	TT	TG	TG	TG	TT	TT	TG	TG	TG	GG	TG	TG	GG	GG	TT	TG	GG	TG	GG	GG	TG	TT	TT	TG	GG	GG	TG	TG	TG	TG	TT	TG
Gm02_41073862	Gm02	41073862	56.08	G	0.273504	GG	GC	GC	GC	GG	GC	CC	GG	GC	CC	GC	CC	GG	CC	GC	GC	GG	GG	CC	GC	GC	CC	GC	GC	GC	CC	GG	GC	CC	GC	CC	CC	GC	GG	GG	GC	CC	CC	GC	GC	GC	GC	GG	GC
Gm02_40959476	Gm02	40959476	57.38	C	0.273504	CC	CT	CT	CT	CC	CT	TT	CC	CT	TT	CT	TT	CC	TT	CT	CT	CC	CC	TT	CT	CT	TT	CT	CT	CT	TT	CC	CT	TT	CC	TT	TT	CT	CC	CC	CT	TT	TT	CT	CT	CT	CT	CC	CT
Gm02_40959504	Gm02	40959504	57.6	T	0.273504	TT	TC	TC	TC	TT	TC	CC	TT	TC	CC	TC	CC	TT	CC	TC	TC	TT	TT	CC	TC	TC	CC	TC	TC	TC	CC	TT	TC	CC	TT	CC	CC	TC	TT	TT	TC	CC	CC	TC	TC	TC	TC	TT	TC
Gm02_40959551	Gm02	40959551	58.03	G	0.273504	GG	GA	GA	GA	GG	GA	AA	GG	GA	AA	GA	AA	GG	AA	GA	GA	GG	GG	AA	GA	GA	AA	GA	GA	GA	AA	GG	GA	AA	GG	AA	AA	GA	GG	GG	GA	AA	AA	GA	GG	GA	GA	GG	GA
Gm02_40959537	Gm02	40959537	58.25	C	0.273504	CC	CG	CG	CG	CC	CG	GG	CC	CG	GG	CG	GG	CC	GG	CG	CG	CC	CC	GG	CG	CG	GG	CG	CG	CG	GG	CC	CG	GG	CC	GG	GG	CG	CC	CC	CG	GG	GG	CG	CG	CG	CG	CC	CG
Gm02_40959444	Gm02	40959444	58.47	T	0.273504	TT	TC	TC	TC	TT	TC	CC	TT	TC	CC	TC	CC	TT	CC	TC	TC	TT	TT	CC	TC	TC	CC	TC	TC	TC	CC	TT	TC	CC	TT	CC	CC	TC	TT	TT	TC	CC	CC	TC	TC	TC	TC	TT	TC
Gm02_40815039	Gm02	40815039	60.21	C	0.277778	CC	CA	CA	CA	CC	CA	AA	CC	CA	AA	CA	AA	CC	AA	CA	CA	CC	CC	AA	CA	CA	AA	CA	CA	CA	AA	CC	CA	AA	CC	AA	AA	CA	CC	CC	CA	AA	AA	CA	CA	CA	CA	CC	CA
Gm02_40815070	Gm02	40815070	61.08	A	0.277778	AA	AG	AG	AG	AA	AG	GG	AA	AG	GG	AG	GG	AA	GG	AG	AG	AA	AA	GG	AG	AG	GG	AG	AG	AG	GG	AA	AG	GG	AA	GG	GG	AG	AA	AA	AG	GG	GG	AG	AG	AG	AG	AA	AG
Gm02_40815096	Gm02	40815096	61.52	G	0.277778	GG	GA	GA	GA	GG	GA	AA	GG	GA	AA	GA	AA	GG	AA	GA	GA	GG	GG	AA	GA	GA	AA	GA	GA	GA	AA	GG	GA	AA	GG	AA	AA	GA	GG	GG	GA	AA	AA	GA	GA	GA	GA	GG	GA
Gm02_40564508	Gm02	40564508	63.7	T	0.282051	TT	TC	TC	TC	TT	TC	CC	TT	TC	CC	TC	CC	TT	CC	TC	TC	TT	TT	CC	TC	TC	CC	TC	TC	TC	CC	TT	TC	CC	TC	CC	CC	TC	TT	TT	TC	CC	CC	TC	TC	TC	TC	TT	CC
Gm02_40564560	Gm02	40564560	63.92	A	0.282051	AA	AG	AG	AG	AA	AG	GG	AA	AG	GG	AG	GG	AA	GG	AG	AG	AA	AA	GG	AG	AG	GG	AG	AG	AG	GG	AA	AG	GG	AG	GG	GG	AG	AA	AA	AG	GG	GG	AG	AG	AG	AG	AA	GG
Gm02_40058782	Gm02	40058782	65.45	A	0.277778	AA	AG	AG	AG	AA	AG	GG	AA	AG	GG	AG	GG	AA	GG	AG	AG	AA	AA	GG	AG	AG	GG	AG	GG	AG	AG	AA	AG	GG	AG	GG	GG	AG	AA	AA	AG	GG	GG	AG	AG	AG	AG	AA	GG
Gm02_40058815	Gm02	40058815	66.1	T	0.277778	TT	TG	TG	TG	TT	TG	GG	TT	TG	GG	TG	GG	TT	GG	TG	TG	TT	TT	GG	TG	TG	GG	TG	GG	TG	TG	TT	TG	GG	TT	GG	GG	TG	TT	TT	TG	GG	GG	TG	TG	TG	TG	TT	GG
Gm02_39941515	Gm02	39941515	66.31	T	0.277778	TT	TC	TC	TC	TT	TC	CC	TT	TC	CC	TC	CC	TT	CC	TC	TC	TT	TT	CC	TC	TC	CC	TC	CC	TC	TC	TT	TC	CC	TT	CC	CC	TC	TT	TT	TC	CC	CC	TC	TC	TC	TC	TT	CC
Gm02_39730812	Gm02	39730812	71.88	C	0.311966	TT	CT	CT	CT	TT	CT	CC	TT	CT	CC	TT	CC	TT	CC	CT	TT	TT	TT	CC	CT	CT	CC	CT	CC	CT	CT	TT	CT	CC	CT	CC	CC	CT	TT	TT	CT	CC	CC	TT	TT	CT	CT	TT	CC
Gm02_39730819	Gm02	39730819	72.75	G	0.311966	GG	GA	GA	GA	GA	GA	AA	GG	GA	AA	GG	AA	GG	AA	GA	GG	GG	GG	AA	GA	GA	AA	GA	AA	GA	GA	GG	GA	AA	GA	AA	AA	GA	GG	GG	GA	AA	AA	GG	GG	GA	GA	GG	AA
Gm02_39614354	Gm02	39614354	76.72	C	0.277778	CC	CA	CA	CA	CA	CA	AA	CC	CA	AA	CA	AA	CC	AA	CA	CA	CC	CC	AA	CA	CA	AA	CA	AA	CA	CA	CC	CA	AA	CA	AA	AA	CA	CC	CC	CA	AA	AA	CA	CA	CA	CA	CC	AA
Gm02_39567112	Gm02	39567112	76.94	C	0.282051	TT	CT	CT	CT	CT	CT	CC	TT	CT	CC	CT	CC	TT	CC	CT	CT	TT	TT	CC	CT	CT	CC	CT	CC	CT	CT	TT	CT	CC	CT	CC	CC	CT	TT	TT	CT	CC	CC	CT	CT	CT	CT	TT	CC
Gm02_39567143	Gm02	39567143	77.16	G	0.282051	AA	GA	GA	GA	GA	GA	GG	AA	GA	GG	GA	GG	AA	GG	GA	GA	AA	AA	GG	GA	GA	GG	GA	GG	GA	GA	AA	GA	GG	GA	GG	GG	GA	AA	AA	GA	GG	GG	GA	GA	GA	GA	AA	GG
Gm02_39567138	Gm02	39567138	77.59	C	0.290598	TT	CT	CT	CT	CT	CT	CC	TT	CT	CC	CT	CC	TT	CC	CT	CT	TT	TT	CC	CT	CT	CC	CT	CC	CT	CT	TT	CT	CC	CT	CC	CC	CT	TT	TT	CT	CC	CC	CT	CT	CT	CT	TT	CC
Gm02_39567097	Gm02	39567097	78.46	A	0.282051	AA	AT	AT	AT	AT	AT	TT	AA	AT	TT	AT	TT	AA	TT	AT	AT	AA	AA	TT	AT	AT	TT	AT	TT	AT	AT	AA	AT	TT	AT	TT	TT	AT	AA	AA	AT	TT	TT	AT	AT	AT	AT	AA	TT
Gm02_39396259	Gm02	39396259	78.89	A	0.282051	AA	AG	AG	AG	AG	AG	GG	AA	AG	GG	AG	GG	AA	GG	AG	AG	AG	AA	GG	AG	AG	GG	AG	GG	AG	AG	AA	AG	GG	AG	GG	GG	AG	AA	AA	AG	GG	GG	AG	AG	AG	AG	AA	GG
Gm02_39309968	Gm02	39309968	79.54	A	0.269231	AA	AT	AT	AT	AT	AT	TT	AA	AT	TT	AT	TT	AA	TT	AT	AT	AT	AA	TT	AT	AT	TT	AT	TT	AT	AT	AA	AT	TT	AT	TT	TT	AT	AA	AA	AT	TT	TT	AT	AT	AT	AT	AA	TT
Gm02_39120388	Gm02	39120388	81.28	T	0.264957	TT	TG	TG	TG	TG	TG	GG	TT	TG	GG	TG	GG	TT	GG	TG	TG	TG	TT	GG	TG	TG	GG	TG	GG	TG	TG	TT	TG	GG	TT	GG	GG	TG	TT	TT	TG	GG	GG	TG	TG	TG	TG	TT	GG
Gm02_38423872	Gm02	38423872	84.35	A	0.260684	AC	AC	AC	AC	AC	AC	CC	AA	AC	AC	AC	CC	AA	CC	CC	AC	AC	AC	CC	AC	AC	CC	AC	CC	AC	AC	AA	AC	CC	AA	CC	CC	AC	AA	AA	AC	CC	CC	AC	AC	AC	AC	AA	CC
Gm02_38729827	Gm02	38729827	84.57	T	0.260684	TC	TC	TC	TC	TC	TC	CC	TT	TC	TC	TC	CC	TT	CC	CC	TC	TC	TC	CC	TC	TC	CC	TC	CC	TC	TC	TT	TC	CC	TT	CC	CC	TC	TT	TT	TC	CC	CC	TC	TC	TC	TC	TT	CC
Gm02_38789444	Gm02	38789444	85	G	0.260684	GC	GC	GC	GC	GC	GC	CC	GG	GC	GC	GC	CC	GG	CC	CC	GC	GC	GC	CC	GC	GC	CC	GC	CC	GC	GC	GG	GC	CC	GG	CC	CC	GC	GG	GG	GC	CC	CC	GC	GC	GC	GC	GG	CC
Gm02_37663316	Gm02	37663316	86.31	C	0.269231	CT	CT	CT	CT	CT	CT	TT	CC	CT	CT	CT	TT	CC	TT	TT	CT	CT	CT	TT	CT	CT	TT	CT	TT	CT	CT	CC	CT	TT	CC	TT	TT	CT	CT	CC	CT	TT	TT	CT	CT	CT	CT	CC	TT
Gm02_37621830	Gm02	37621830	87.19	T	0.269231	TC	TC	TC	TC	TC	TC	CC	TT	TC	TC	TC	CC	TT	CC	CC	TC	TC	TC	CC	TC	TC	CC	TC	CC	TC	TC	TT	TC	CC	TT	CC	CC	TC	TC	TT	TC	CC	CC	TC	TC	TC	TC	TT	CC
Gm02_37621823	Gm02	37621823	87.4	A	0.264957	AT	AT	AT	AT	AT	AT	TT	AA	AT	AT	AT	TT	AA	TT	TT	AT	AT	AT	TT	AT	AT	TT	AT	TT	AT	AT	AA	AT	TT	AA	TT	TT	AT	AT	AA	AT	TT	TT	AT	AT	AT	AT	AA	TT
Gm02_38328489	Gm02	38328489	88.05	T	0.25641	TG	TG	TG	TG	TG	TG	GG	TT	TG	TG	TG	GG	TT	GG	GG	TG	TG	TG	GG	TG	TG	GG	TG	GG	TG	TG	TT	TG	GG	TT	GG	GG	TG	TG	TT	TG	GG	GG	TG	TG	TG	TG	TT	GG
Gm02_37951263	Gm02	37951263	88.27	C	0.260684	CG	CG	CG	CG	CG	CG	GG	CC	CG	CG	CG	GG	CC	GG	GG	CG	CG	CG	GG	CG	CG	GG	CG	GG	CG	CG	CC	CG	GG	CC	GG	GG	CG	CG	CC	CG	GG	GG	CG	CG	CG	CG	CC	GG
Gm02_37337086	Gm02	37337086	88.49	C	0.260684	CT	CT	CT	CT	CT	CT	TT	CC	CT	CT	CT	TT	CC	TT	TT	CT	CT	CT	TT	CT	CT	TT	CT	TT	CT	CT	CC	CT	TT	CC	TT	TT	CT	CT	CC	CT	TT	TT	CT	CT	CT	CT	CC	TT
Gm02_37219402	Gm02	37219402	88.92	C	0.264957	CG	CG	CG	CG	CG	CG	GG	CC	CG	CG	CG	GG	CC	GG	GG	CG	CG	CG	GG	CG	CG	GG	CG	GG	CG	CG	CC	CG	GG	CC	GG	GG	CG	CG	CC	CG	GG	GG	CG	CG	CG	CG	CC	GG
Gm02_37232039	Gm02	37232039	89.14	T	0.269231	TC	TC	TC	TC	TC	TC	CC	TT	TC	TC	TC	CC	TT	CC	CC	TC	TC	TC	CC	TC	TC	CC	TC	CC	TC	TC	TT	TC	CC	TT	CC	CC	TC	TC	TT	TC	CC	CC	TC	TC	TC	TC	TT	CC
Gm02_37232070	Gm02	37232070	89.79	T	0.273504	TC	TC	TC	TC	TC	TC	CC	TT	TC	TC	TC	CC	TT	CC	CC	TC	TC	TC	CC	TC	TC	CC	TC	CC	TC	TC	TT	TC	CC	TT	CC	CC	TC	TC	TT	TC	CC	CC	TC	TC	TC	TC	TT	CC
Gm02_31665695	Gm02	31665695	90.44	A	0.277778	AG	AG	AG	AG	AG	AG	GG	AA	AG	AG	AG	GG	AA	GG	GG	AG	AG	AG	GG	AG	AG	GG	AG	GG	AG	AG	AA	AG	GG	AA	GG	GG	AG	AG	AA	AG	GG	GG	AG	AG	AG	AG	AA	GG
Gm02_32130193	Gm02	32130193	90.66	G	0.277778	GA	GA	GA	GA	GA	GA	AA	GG	GA	GA	GA	AA	GG	AA	AA	GA	GA	GA	AA	GA	GA	AA	GA	AA	GA	GA	GG	GA	AA	GG	AA	AA	GA	GA	GG	GA	AA	AA	GA	GA	GA	GA	GG	AA
Gm02_35733092	Gm02	35733092	91.53	G	0.273504	GA	GA	GA	GA	GA	GA	AA	GG	GA	GA	GA	AA	GG	AA	AA	GA	GA	GA	AA	GA	GA	AA	GA	AA	GA	GA	GG	GA	AA	GG	AA	AA	GA	GA	GG	GA	AA	AA	GA	GA	GA	GA	GG	AA
Gm02_35733100	Gm02	35733100	91.74	T	0.269231	TA	TA	TA	TA	TA	TA	AA	TT	TA	TA	TA	AA	TT	AA	AA	TA	TA	TA	AA	TA	TA	AA	TA	AA	TA	TA	TT	TA	AA	TT	AA	AA	TA	TA	TT	TA	AA	AA	TA	TA	TA	TA	TT	AA
Gm02_33945174	Gm02	33945174	93.29	T	0.286325	TG	TG	TG	TG	TG	TG	GG	TT	TG	TG	TG	GG	TT	GG	GG	TG	TG	TG	GG	TG	TG	GG	TG	GG	TG	TG	TT	TG	GG	TT	GG	GG	TG	TG	TT	TG	GG	GG	TG	TG	TG	TG	TT	GG
Gm02_35997315	Gm02	35997315	94.4	A	0.269231	AG	AG	AG	AG	AG	AG	GG	AA	AG	AG	AG	GG	AA	GG	GG	AG	AG	AG	GG	AG	AG	GG	AG	GG	AG	AG	AA	AG	GG	AA	GG	GG	AG	AG	AA	AG	GG	GG	AG	AG	AG	AG	AA	GG
Gm02_35997260	Gm02	35997260	94.83	C	0.277778	CT	CT	CT	CT	CT	CT	TT	CC	CT	CT	CT	TT	CC	TT	TT	CT	CT	CT	TT	CT	CT	TT	CT	TT	CT	CT	CC	CT	TT	CC	TT	TT	CT	CT	CC	CT	TT	TT	CT	CT	CT	CT	CC	TT
Gm02_35997303	Gm02	35997303	95.27	G	0.269231	GA	GA	GA	GA	GA	GA	AA	GG	GA	GA	GA	AA	GG	AA	AA	GA	GA	GA	AA	GA	GA	AA	GA	AA	GA	GA	GG	GA	AA	GG	AA	AA	GA	GA	GG	GA	AA	AA	GA	GA	GA	GA	GG	AA
Gm02_36180480	Gm02	36180480	95.49	T	0.269231	TC	TC	TC	TC	TC	TC	CC	TT	TC	TC	TC	CC	TT	CC	CC	TC	TC	TC	CC	TC	TC	CC	TC	CC	TC	TC	TT	TC	CC	TT	CC	CC	TC	TC	TT	TC	CC	CC	TC	TC	TC	TC	TT	CC
Gm02_32971803	Gm02	32971803	95.7	T	0.269231	TA	TA	TA	TA	TA	TA	AA	TT	TA	TA	TA	AA	TT	AA	AA	TA	TA	TA	AA	TA	TA	AA	TA	AA	TA	TA	TT	TA	AA	TT	AA	AA	TA	TA	TT	TA	AA	AA	TA	TA	TA	TA	TT	AA
Gm02_32754181	Gm02	32754181	95.92	G	0.269231	GA	GA	GA	GA	GA	GA	AA	GG	GA	GA	GA	AA	GG	AA	AA	GA	GA	GA	AA	GA	GA	AA	GA	AA	GA	GA	GG	GA	AA	GG	AA	AA	GA	GA	GG	GA	AA	AA	GA	GA	GA	GA	GG	AA
Gm02_33010536	Gm02	33010536	97.01	A	0.277778	AT	AT	AT	AT	AT	AT	TT	AA	AT	AT	AT	TT	AA	TT	TT	AT	AT	AT	TT	AT	AT	TT	AT	TT	AT	AT	AA	AT	TT	AA	TT	TT	AT	AT	AA	AT	AA	TT	AT	AT	AT	AT	AA	TT
Gm02_33010516	Gm02	33010516	97.88	A	0.273504	AG	AG	AG	AG	AG	AG	GG	AA	AG	AG	AG	GG	AA	GG	GG	AG	AG	AG	GG	AG	AG	GG	AG	GG	AG	AG	AA	AG	GG	AA	GG	GG	AG	AG	AA	AG	GG	GG	AG	AG	AG	AG	AA	GG
Gm02_35370311	Gm02	35370311	98.09	T	0.269231	TC	TC	TC	TC	TC	TC	CC	TT	TC	TC	TC	CC	TT	CC	CC	TC	TC	TC	CC	TC	TC	CC	TC	CC	TC	TC	TT	TC	CC	TT	CC	CC	TC	TC	TT	TC	CC	CC	TC	TC	TC	TC	TT	CC
Gm02_36643544	Gm02	36643544	98.96	C	0.277778	CC	CT	CT	CT	CT	CT	TT	CC	CT	CT	CT	TT	CC	TT	TT	CT	CT	CT	TT	CT	CT	TT	CT	TT	CT	CT	CC	CT	TT	CC	TT	TT	CT	CT	CC	CT	TT	TT	CT	CT	CT	CT	CC	TT
Gm02_36643500	Gm02	36643500	100.27	C	0.282051	CT	CT	CT	CT	CT	CT	TT	CC	CT	CT	CT	TT	CC	TT	TT	CT	CT	CT	TT	CT	CT	TT	CT	TT	CT	CT	CC	CT	TT	CC	TT	TT	CT	CT	CC	CT	TT	TT	CT	CT	CT	CT	CC	TT
Gm02_35370337	Gm02	35370337	101.8	T	0.282051	TC	TC	TC	TC	TC	TC	CC	TT	TC	TC	TC	CC	TT	CC	CC	TC	TC	TC	CC	TC	TC	CC	TC	CC	TC	TC	TT	TC	CC	TT	CC	CC	TC	TC	TT	TC	CC	CC	TC	TC	TC	TC	TT	CC
Gm02_35836633	Gm02	35836633	105.32	A	0.32906	AC	AC	AC	AC	AC	AC	CC	AA	AC	AA	AC	CC	AA	CC	CC	AC	AC	AC	CC	AA	AC	CC	AC	CC	AC	AC	AA	AA	CC	AA	CC	CC	AC	AC	AA	AC	CC	CC	AC	AC	AC	AC	AA	CC
Gm02_35836622	Gm02	35836622	106.85	G	0.299145	GA	GA	GA	GA	GA	GA	AA	GG	GA	GG	GA	AA	GG	AA	AA	GA	GA	GA	AA	GG	GA	AA	GA	AA	GA	GA	GG	GG	AA	GG	AA	AA	GA	GA	GG	GA	AA	AA	GA	GA	GA	GA	GG	AA
Gm02_31501131	Gm02	31501131	111.9	T	0.294872	TT	TC	TC	TC	TC	TC	CC	TT	TC	TC	TC	CC	TT	CC	CC	TC	TC	TC	CC		TT	CC	TC	CC	TT	TC	TT	TC	CC	TT	CC	CC	TC	TC	TT	CC	CC	CC	TC	TC	TC	CC	TT	CC
Gm02_31501127	Gm02	31501127	113.26	C	0.290598	CC	CT	CT	CT	CT	CT	TT	CC	CT	CT	CT	TT	CC	TT	TT	CT	CT	CT	TT		CC	TT	CT	TT	CC	CT	CC	CT	TT	CC	TT	TT	CT	CT	CC	CT	TT	TT	CT	CT	CT	TT	CC	TT
Gm02_31428426	Gm02	31428426	115.96	T	0.269231	TC	TC	TC	TC	TC	TC	CC	TT	TC	TC	TC	CC	TT	CC	CC	TC	TC	TC	CC	TC	TC	CC	TC	CC	TC	TC	TT	TC	CC	TT	CC	CC	TC	TC	TT	TC	CC	CC	TC	TC	TC	TC	TT	CC
Gm02_36870818	Gm02	36870818	116.17	T	0.273504	TA	TA	TA	TA	TA	TA	AA	TT	TA	TA	TA	AA	TT	AA	AA	TA	TA	TA	AA	TA	TA	AA	TA	AA	TA	TA	TT	TA	AA	TT	AA	AA	TA	TA	TT	TA	AA	AA	TA	TA	TA	TA	TT	AA
Gm02_31850085	Gm02	31850085	119.03	A	0.324786	AG	AG	AA	AG	AG	AG	GG	AA	AG	AG	AA	GG	AA	GG	GG	AG	AG	AG	GG	AG	AG	GG	AG	GG	AG	AG	AA	AG	GG	AA	GG	GG	AG	AG	AA	AG	GG	GG	AG	AG	AG	AG	AA	GG
Gm02_31850084	Gm02	31850084	119.24	C	0.32906	CT	CT	CC	CT	CT	CT	TT	CC	CT	CT	CC	TT	CC	TT	TT	CT	CT	CT	TT	CT	CT	TT	CT	TT	CT	CT	CC	CT	TT	CC	TT	TT	CT	CT	CC	CT	TT	TT	CT	CT	CT	CT	CC	TT
Gm02_31850044	Gm02	31850044	120.33	G	0.324786	GC	GC	GG	GC	GC	GC	CC	GG	GC	GC	GG	CC	GG	CC	CC	GC	GC	GC	CC	GC	GC	CC	GC	CC	GC	GC	GG	GC	CC	GG	CC	CC	GC	GC	GG	GC	CC	CC	GC	GC	GC	GC	GG	CC
Gm02_32130132	Gm02	32130132	122.74	C	0.282051	CT	CT	CT	CT	CT	CT	TT	CC	CT	CT	CT	TT	CC	TT	TT	CT	CT	CT	TT	CT	CT	TT	CT	TT	CT	CT	CC	CT	TT	CC	TT	TT	CT	CT	CC	CT	TT	TT	CT	CT	CT	CT	CC	TT
Gm02_32130222	Gm02	32130222	123.17	T	0.282051	TC	TC	TC	TC	TC	TC	CC	TT	TC	TC	TC	CC	TT	CC	CC	TC	TC	TC	CC	TC	TC	CC	TC	CC	TC	TC	TT	TC	CC	TT	CC	CC	TC	TC	TT	TC	CC	CC	TC	TC	TC	TC	TT	CC
Gm02_32130239	Gm02	32130239	123.39	T	0.277778	TC	TC	TC	TC	TC	TC	CC	TT	TC	TC	TC	CC	TT	CC	CC	TC	TC	TC	CC	TC	TC	CC	TC	CC	TC	TC	TT	TC	CC	TT	CC	CC	TC	TC	TT	TC	CC	CC	TC	TC	TC	TC	TT	CC
Gm02_31593093	Gm02	31593093	123.6	G	0.273504	GT	GT	GT	GT	GT	GT	TT	GG	GT	GT	GT	TT	GG	TT	TT	GT	GT	GT	TT	GT	GT	TT	GT	TT	GT	GT	GG	GT	TT	GG	TT	TT	GT	GT	GG	GT	TT	TT	GT	GT	GT	GT	GG	TT
Gm02_30999255	Gm02	30999255	124.04	T	0.273504	TC	TC	TC	TC	TC	TC	CC	TT	TC	TC	TC	CC	TT	CC	CC	TC	TC	TC	CC	TC	TC	CC	TC	CC	TC	TC	TT	TC	CC	TT	CC	CC	TC	TC	TT	TC	CC	CC	TC	TC	TC	TC	TT	CC
Gm02_31110741	Gm02	31110741	124.25	T	0.269231	TG	TG	TG	TG	TG	TG	GG	TT	TG	TG	TG	GG	TT	GG	GG	TG	TG	TG	GG	TG	TG	GG	TG	GG	TG	TG	TT	TG	GG	TT	GG	GG	TG	TG	TT	TG	GG	GG	TG	TG	TG	TG	TT	GG
Gm02_31110778	Gm02	31110778	124.9	C	0.277778	CT	CT	CT	CT	CT	CT	TT	CC	CT	CT	CT	TT	CC	TT	TT	CT	CT	CT	TT	CT	CT	TT	CT	TT	CT	CT	CC	CT	TT	CC	TT	TT	CT	CT	CC	CT	TT	TT	CT	CC	CT	CT	CC	TT
Gm02_31318721	Gm02	31318721	125.99	T	0.277778	TC	TC	TC	TC	TC	TC	CC	TT	TC	TC	TC	CC	TT	CC	CC	TC	TC	TC	CC	TC	TC	CC	TC	CC	TC	TC	TT	TC	CC	TT	CC	CC	TC	TC	TT	TC	CC	CC	TC	TC	TC	TC	TT	CC
Gm02_31318712	Gm02	31318712	126.21	C	0.282051	CT	CT	CT	CT	CT	CT	TT	CC	CT	CT	CT	TT	CC	TT	TT	CT	CT	CT	TT	CT	CT	TT	CT	TT	CT	CT	CC	CT	TT	CC	TT	TT	CT	CT	CC	CT	TT	TT	CT	CT	CT	CT	CC	TT
Gm02_29545857	Gm02	29545857	126.86	G	0.273504	GA	GA	GA	GA	GA	GA	AA	GG	GA	GA	GA	AA	GG	AA	AA	GA	GA	GA	AA	GA	GA	AA	GA	AA	GA	GA	GG	GA	AA	GG	AA	AA	GA	GA	GG	GA	AA	AA	GA	GA	GA	GA	GG	AA
Gm02_27627995	Gm02	27627995	127.07	T	0.273504	TG	TG	TG	TG	TG	TG	GG	TT	TG	TG	TG	GG	TT	GG	GG	TG	TG	TG	GG	TG	TG	GG	TG	GG	TG	TG	TT	TG	GG	TT	GG	GG	TG	TG	TT	TG	GG	GG	TG	TG	TG	TG	TT	GG
Gm02_27667027	Gm02	27667027	127.29	C	0.273504	CA	CA	CA	CA	CA	CA	AA	CC	CA	CA	CA	AA	CC	AA	AA	CA	CA	CA	AA	CA	CA	AA	CA	AA	CA	CA	CC	CA	AA	CC	AA	AA	CA	CA	CC	CA	AA	AA	CA	CA	CA	CA	CC	AA
Gm02_27398243	Gm02	27398243	129.27	G	0.294872	GA	GA	GA	GA	GG	GA	AA	GG	GA	GA	GA	AA	GG	AA	AA	GA	GA	GA	AA	GA	GA	AA	GA	AA	GA	GA	GG	GA	AA	GG	AA	AA	GG	GA	GG	GA	AA	AA	GA	GA	GA	GA	GG	AA
Gm02_27398215	Gm02	27398215	130.58	G	0.311966	GA	GA	GA	GA	GG	GA	AA	GG	GA	GA	GA	AA	GG	AA	AA	GA	GA	GA	AA	GA	GA	AA	GA	AA	GA	GA	GG	GA	AA	GG	AA	AA	GG	GA	GG	GA	AA	AA	GA	GA	GA	GG	GG	AA
Gm02_26862014	Gm02	26862014	133.22	T	0.290598	TC	TC	TC	TC	TC	TC	CC	TT	TC	TC	TC	CC	TT	CC	CC	TC	TC	TC	CC	TC	TC	TC	TC	CC	TC	TC	TT	TC	CC	TT	CC	CC	TC	TC	TT	TC	CC	CC	TC	TC	TC	TC	TT	CC
Gm02_26862022	Gm02	26862022	133.44	G	0.286325	GA	GA	GA	GA	GA	GA	AA	GG	GA	GA	GA	AA	GG	AA	AA	GA	GA	GA	AA	GA	GA	GA	GA	AA	GA	GA	GG	GA	AA	GG	AA	AA	GA	GA	GG	GA	AA	AA	GA	GA	GA	GA	GG	AA
Gm02_26862036	Gm02	26862036	133.66	T	0.282051	TC	TC	TC	TC	TC	TC	CC	TT	TC	TC	TC	CC	TT	CC	CC	TC	TC	TC	CC	TC	TC	TC	TC	CC	TC	TC	TT	TC	CC	TT	CC	CC	TC	TC	TT	TC	CC	CC	TC	TC	TC	TC	TT	CC
Gm02_16964199	Gm02	16964199	135.84	G	0.303419	GA	GA	GA	GA	GA	GA	AA	GG	GA	GG	GG	AA	GG	AA	AA	GA	GA	GA	AA	GA	GA	GA	GA	AA	GA	GA	GG	GA	AA	GG	AA	AA	GA	GA	GG	GA	AA	AA	GA	GA	GG	GA	GG	AA
Gm02_21831498	Gm02	21831498	138.03	G	0.277778	GA	GA	GA	GA	GA	GA	AA	GG	GA	GA	GA	AA	GG	AA	AA	GA	GA	GA	AA	GA	GA	GA	GA	AA	GA	GA	GG	GA	AA	GG	AA	AA	GA	GA	GG	GA	AA	AA	GA	GA	GA	GA	GG	AA
Gm02_18309787	Gm02	18309787	138.47	C	0.273504	CT	CT	CT	CT	CT	CT	TT	CC	CT	CT	CT	TT	CC	TT	TT	CT	CT	CT	TT	CT	CT	CT	CT	TT	CT	CT	CC	CT	TT	CC	TT	TT	CT	CT	CC	CT	TT	TT	CT	CT	CT	CT	CC	TT
Gm02_25658619	Gm02	25658619	138.9	A	0.273504	AG	AG	AG	AG	AG	AG	GG	AA	AG	AG	AG	GG	AA	GG	GG	AG	AG	AG	GG	AG	AG	AG	AG	GG	AG	AG	AA	AG	GG	AA	GG	GG	AG	AG	AA	AG	GG	GG	AG	AG	AG	AG	AA	GG
Gm02_15803605	Gm02	15803605	139.77	C	0.277778	CT	CT	CT	CT	CT	CT	TT	CC	CT	CT	CT	TT	CC	TT	TT	CT	CT	CT	TT	CT	CT	CT	CT	TT	CT	CT	CC	CT	TT	CC	TT	TT	CT	CT	CC	CT	TT	TT	CT	CT	CT	CT	CC	TT
Gm02_14958738	Gm02	14958738	152.75	A	0.269231	AG	AG	AG	AG	AG	AG	AA	GG	AG	AG	AG	AA	GG	AA	AA	GG	AG	AA	AA	AG	AG	AG	AG	AA	AG	AG	GG	AG	AA	AG	AG	AA	AG	AG	GG	AA	AA	AA	AG	GG	AA	AG	AG	AA
Gm02_14773039	Gm02	14773039	155.38	A	0.273504	AC	AC	AC	AC	AC	AC	AA	CC	AC	AC	AC	AC	CC	AA	AA	CC	AC	AA	AA	AC	AC	CC	AC	AA	AC	AC	AC	CC	AA	AC	AC	AA	AC	AC	CC	AA	AA	AA	AC	CC	AA	AC	AC	AA
Gm02_14773094	Gm02	14773094	155.81	G	0.273504	GA	GA	GA	GA	GA	GA	GG	AA	GA	GA	GA	GA	AA	GG	GG	AA	GA	GG	GG	GA	GA	AA	GA	GG	GA	GA	GA	AA	GG	GA	GA	GG	GA	GA	AA	GG	GG	GG	GA	AA	GG	GA	GA	GG
Gm02_14583903	Gm02	14583903	157.56	T	0.269231	TC	TC	TC	TC	TC	TC	TT	CC	TC	TC	TC	TC	CC	TT	TT	CC	TC	TT	TT	TC	TC	CC	TC	TT	TC	TC	TC	CC	TT	TC	TC	TT	TC	TC	CC	TT	TT	TT	TC	CC	TT	TC	TC	TT
Gm02_14516633	Gm02	14516633	161.08	C	0.320513	CA	CA	CA	CC	CC	CA	CC	AA	CA	CA	CA	CC	AA	CC	CC	AA	CA	CC	CC	CA	CA	AA	CA	CC	CA	CA	CA	AA	CC	CA	CA	CC	CA	CA	AA	CC	CC	CC	CA	AA	CC	CA	CA	CC
Gm02_14516603	Gm02	14516603	163.27	C	0.320513	CT	CC	CT	CT	CC	CT	CC	TT	CT	CT	CT	CT	TT	CC	CC	TT	CT	CC	CC	CT	CT	TT	CT	CC	CT	CT	CT	TT	CC	CT	CT	CC	CT	CT	TT	CC	CC	CC	CT	TT	CC	CT	CT	CC
Gm02_14516611	Gm02	14516611	164.36	C	0.316239	CT	CC	CT	CT	CC	CT	CC	TT	CT	CT	CT	CT	TT	CC	CC	TT	CT	CC	CC	CT	CT	TT	CT	CC	CT	CT	CT	TT	CC	CT	CT	CC	CT	CT	TT	CC	CC	CC	CT	TT	CC	CT	CT	CC
Gm02_14516619	Gm02	14516619	165.88	A	0.320513	AG	AA	AG	AG	AG	AG	AA	GG	AG	AG	AG	AG	GG	AA	AA	GG	AG	AA	AA	AG	AG	GG	AG	AA	AG	AG	AG	GG	AA	AG	AG	AA	AG	AG	GG	AA	AA	AA	AG	GG	AA	AG	AG	AA
Gm02_14400217	Gm02	14400217	169.63	C	0.264957	CT	CT	CT	CT	CT	CT	CC	TT	CT	CT	CT	CT	TT	CC	CC	TT	CT	CC	CC	CT	CT	TT	CC	CC	CT	CT	CT	TT	CC	CT	CT	CC	CT	CT	TT	CC	CC	CC	CT	TT	CC	CT	CT	CC
Gm02_14237330	Gm02	14237330	171.16	G	0.264957	GA	GA	GA	GA	GA	GA	GG	AA	GA	GA	GA	GA	AA	GG	GG	AA	GA	GG	GG	GA	GA	AA	GA	GG	GA	GA	GA	GA	GG	GA	GA	GG	GG	GA	AA	GG	GG	GG	GA	AA	GG	GG	GA	GG
Gm02_14075422	Gm02	14075422	172.68	T	0.269231	TG	TG	TG	TG	TG	TG	TT	GG	TG	TG	TG	TG	GG	TT	TT	GG	GG	TT	TT	TG	TG	GG	TG	TT	TG	TG	TG	TG	TT	TG	TG	TT	TT	TG	GG	TT	TT	TT	TG	GG	TT	TT	TG	TT
Gm02_13760686	Gm02	13760686	180.65	T	0.294872	TC	TC	TC	TC	TC	TC	TT	CC	TC	TC	TC	CC	CC	TT	CC	CC	CC	TT	TT	CC	TC	CC	TC	TT	TC	TC	TC	TC	TT	TC	TC	TT	TT	CC	CC	CC	CC	TT	CC	CC	TT	TT	TC	TT
Gm02_13533808	Gm02	13533808	183.06	A	0.290598	AG	AG	AG	AG	AG	AG	AA	GG	AA	AG	AG	GG	GG	AA	GG	GG	GG	AA	AA	GG	AG	GG	AG	AA	AG	AG	AG	AG	AA	AG	AG	AA	AA	GG	GG	GG	GG	AA	GG	GG	AA	AA	AG	AA
Gm02_13357583	Gm02	13357583	184.58	G	0.290598	GC	GC	GC	GC	GC	GC	CC	GG	CC	GC	GC	GG	GG	CC	GG	GG	GG	CC	CC	GG	GC	GG	GC	CC	GC	GC	GC	GC	CC	GC	GC	CC	CC	GG	GG	GG	GG	CC	GG	GG	CC	CC	GC	CC
Gm02_12766201	Gm02	12766201	185.89	G	0.290598	GA	GA	GA	GA	GA	GA	GG	AA	GG	AA	GA	AA	AA	GG	AA	AA	AA	GG	GG	AA	GA	AA	GA	GG	GA	GA	GA	GA	GG	GA	GA	GA	GG	AA	AA	AA	AA	GG	AA	AA	GG	GG	GA	GG
Gm02_11845289	Gm02	11845289	200.28	G	0.299145	AA	GG	AA	GA	GA	GA	AA	GG	AA	GG	GA	GA	GA	AA	AA	GG	GG	AA	GA	GA	GA	GG	GA	AA	GA	GA	GA	GA	AA	GG	GA	GA	AA	GA	GA	AA	GA	AA	AA	GG	AA	AA	AA	AA
Gm02_10792025	Gm02	10792025	210.97	G	0.286325	GA	GG	AA	GA	AA	GA	AA	GG	AA	GG	GA	GG	GA	AA	GG	GG	GG	AA	GA	GG	GA	GG	GA	AA	GA	GA	GA	GA	AA	GG	GG	GA	AA	GG	GA	GG	GG	GA	GG	GG	AA	AA	AA	AA
Gm02_10453506	Gm02	10453506	213.16	C	0.286325	CT	CC	TT	CT	TT	CT	TT	CC	CT	CC	CT	CC	CT	CT	CC	CC	CC	TT	TT	CC	CT	CC	CT	TT	CT	CT	CT	CT	TT	CC	CC	CT	TT	CC	CT	CC	CC	CT	CC	CC	TT	TT	TT	CT
Gm02_10453478	Gm02	10453478	213.59	A	0.286325	AC	AA	CC	AC	CC	AC	CC	AA	AC	AA	AC	AA	AC	AC	AA	AA	AA	CC	CC	AA	AC	AA	AC	CC	AC	AC	AC	AC	CC	AA	AA	AC	CC	AA	AC	AA	AA	AC	AA	AA	CC	CC	CC	AC
Gm02_10299683	Gm02	10299683	215.34	T	0.282051	TC	TT	CC	TC	CC	TC	CC	TT	TC	TT	TC	TT	TC	CC	TT	TT	TT	TC	CC	TT	TC	TT	TC	CC	TC	TC	TC	TC	CC	TT	TT	TC	CC	TT	TC	TT	TT	TC	TT	TT	CC	CC	CC	TC
Gm02_10299673	Gm02	10299673	215.99	T	0.290598	TA	TT	AA	TA	AA	TA	AA	TT	TA	TT	TA	TT	TA	AA	TT	TT	TT	TA	AA	TT	TA	TT	TA	AA	TA	TA	TA	TA	AA	TT	TT	TT	AA	TT	TA	TT	TT	TA	TT	TT	AA	AA	AA	TA
Gm02_10013923	Gm02	10013923	218.4	A	0.269231	AT	AT	TT	AT	TT	AT	TT	AA	AT	AT	AT	AA	AT	AT	AA	AA	AA	AT	TT	AA	AT	AA	AT	TT	AT	AT	AT	AT	TT	AA	AA	AT	TT	AA	AT	AA	AA	AT	AA	AA	TT	TT	TT	AT
Gm02_9904698	Gm02	9904698	218.62	T	0.269231	TC	TC	CC	TC	CC	TC	CC	TT	TC	TC	TC	TT	TC	TC	TT	TT	TT	TC	CC	TT	TC	TT	TC	CC	TC	TC	TC	TC	CC	TT	TT	TC	CC	TT	TC	TT	TT	TC	TT	TT	CC	CC	CC	TC
Gm02_10013958	Gm02	10013958	219.27	A	0.273504	AT	AT	TT	AT	TT	AT	TT	AA	AT	AT	AT	AA	AT	AT	AA	AA	AA	AT	TT	AA	AT	AA	AT	TT	AT	AT	AT	AT	TT	AA	AA	AT	TT	AA	AT	AA	AA	AT	AA	AA	TT	TT	TT	AT
Gm02_9542281	Gm02	9542281	220.58	G	0.277778	GA	GA	AA	GA	AA	GA	AA	GG	GA	GA	GA	GG	GA	GA	GG	GG	GG	GA	AA	GG	GA	GG	GA	AA	GA	GA	GA	GA	AA	GG	GG	GA	AA	GG	GA	GG	GG	GA	GG	GG	AA	AA	AA	GA
Gm02_9682373	Gm02	9682373	225.47	G	0.294872	CC	GC	CC	GC	CC	GC	CC	GG	GC	GC	GC	GG	GC	GC	GG	GG	GG	GC	CC	GG	GC	GG	CC	CC	GC	GC	GC	GC	CC	GG	GG	CC	CC	GG	GC	GG	GG	GC	GG	GG	CC	CC	CC	GC
Gm02_9682310	Gm02	9682310	230.37	T	0.32906	GG	TG	GG	TG	GG	TG	GG	TT	TG	TG	TG	TG	TG	TG	GG	TT	TT	TG	GG	TT	TG	TT	GG	GG	TG	TG	TG	TG	GG	TT	TT	GG	GG	TG	TG	GG	TG	TG	GG	TT	GG	GG	GG	TG
Gm02_9682276	Gm02	9682276	230.8	T	0.32906	AA	TA	AA	TA	AA	TA	AA	TT	TA	TA	TA	TA	TA	TA	AA	TT	TT	TA	AA	TT	TA	TT	AA	AA	TA	TA	TA	TA	AA	TT	TT	AA	AA	TA	TA	AA	TA	TA	AA	TT	AA	AA	AA	TA
Gm02_9819343	Gm02	9819343	237.1	G	0.277778	GA	GA	AA	GA	AA	GA	AA	GG	GA	GA	GA	GA	GA	GG	AA	GG	GG	GA	AA	GA	GA	GG	GA	AA	GA	GA	GA	GA	AA	GG	GG	GA	AA	GA	GA	AA	GA	GA	AA	GG	AA	AA	AA	GA
Gm02_9369191	Gm02	9369191	239.07	G	0.273504	GA	GA	GA	GA	AA	GA	AA	GA	GA	GA	GA	GA	GA	GA	AA	GG	GG	GA	AA	GA	GA	GG	GG	AA	GA	GA	GA	GA	AA	GG	GG	GA	AA	GA	GA	AA	GA	GA	AA	GG	AA	AA	AA	GA
Gm02_8245568	Gm02	8245568	240.37	G	0.269231	GA	GA	GA	GA	AA	GA	AA	GA	GA	GA	GA	GA	GA	GA	AA	GG	GA	GA	AA	GA	GA	GG	GG	AA	GA	GA	GA	GA	AA	GG	GG	GA	AA	GA	GA	AA	GA	GA	AA	GG	AA	AA	AA	GA
Gm02_8064520	Gm02	8064520	240.59	C	0.269231	CT	CT	CT	CT	TT	CT	TT	CT	CT	CT	CT	CT	CT	CT	TT	CC	CT	CT	TT	CT	CT	CC	CC	TT	CT	CT	CT	CT	TT	CC	CC	CT	TT	CT	CT	TT	CT	CT	TT	CC	CT	TT	TT	CT
Gm02_7850822	Gm02	7850822	246.86	G	0.299145	GT	GT	GT	GT	GG	GT	GG	GT	GT	GT	GT	TT	GT	GT	TT	TT	GT	GT	GG	TT	GT	TT	TT	GG	GT	GT	GT	GT	GG	TT	TT	GT	GG	TT	GT	TT	TT	GT	TT	TT	GT	GG	GG	GT
Gm02_7597880	Gm02	7597880	247.3	G	0.294872	GA	GA	GA	GA	GG	GA	GG	GA	GA	GA	GA	AA	GA	GA	AA	GA	GA	GA	GG	AA	GA	AA	AA	GG	GA	GA	GA	GA	GG	AA	AA	GA	GG	AA	GA	AA	AA	GA	AA	AA	GA	GG	GG	GA
Gm02_7233669	Gm02	7233669	249.49	T	0.303419	TC	TC	TC	TC	CC	TC	CC	TC	TC	TC	TC	TT	TC	TC	TT	TC	CC	TC	CC	TT	TC	TT	TT	CC	TC	TC	TC	TC	CC	TT	TT	TC	CC	TT	TC	TT	TT	TC	TT	TT	TC	CC	CC	TC
Gm02_7121955	Gm02	7121955	249.92	T	0.303419	TA	TA	TA	TA	AA	TA	AA	TA	TA	TA	TA	TT	TA	TA	TT	TA	AA	TA	AA	TT	TA	TT	TT	AA	TA	TA	TA	TA	AA	TT	TT	TA	AA	TT	TA	TT	TT	TA	TT	TT	TA	AA	AA	TA
Gm02_7003460	Gm02	7003460	250.14	A	0.303419	AC	AC	AC	AC	CC	AC	CC	AC	AC	AC	AC	AA	AC	AC	AA	AC	CC	AC	CC	AA	AC	AA	AA	CC	AC	AC	AC	AC	CC	AA	AA	AC	CC	AA	AC	AA	AA	CC	AA	AA	AC	CC	CC	AC
Gm02_6456758	Gm02	6456758	253.22	C	0.303419	CA	CA	CA	CA	AA	CA	AA	CA	CA	CA	CA	CC	CA	CA	CC	CA	AA	CA	AA	CC	CA	CC	CC	AA	CA	CA	CA	CA	AA	CC	CC	CA	AA	CC	CA	CC	CC	AA	CC	CC	CA	AA	AA	CA
Gm02_6528102	Gm02	6528102	253.43	G	0.299145	GC	GC	GC	GC	GG	GC	GG	GC	GC	GC	GC	CC	GC	GC	CC	GC	GG	GC	GG	CC	GC	CC	CC	GG	GC	GC	GC	GC	GG	CC	CC	GC	GG	CC	GC	CC	CC	GG	CC	CC	GC	GG	GG	GC
Gm02_6431073	Gm02	6431073	259.26	T	0.269231	TC	TC	TC	TC	CC	TC	CC	TC	TC	TC	TC	CC	TC	TC	TC	TC	CC	TC	CC	TT	TC	TT	TT	CC	TC	TC	TC	TC	CC	TT	TT	TC	CC	TC	TC	CC	TC	CC	CC	TT	TC	CC	CC	TC
Gm02_6045318	Gm02	6045318	261.45	C	0.277778	CT	CT	CT	CT	TT	CT	TT	CT	CT	CT	CT	TT	CT	TT	CT	CT	TT	CT	TT	CC	CT	CC	CC	TT	CT	CT	CT	CT	TT	CC	CC	CT	TT	CT	CT	TT	CT	TT	TT	CC	CT	TT	TT	CC
Gm02_6045339	Gm02	6045339	261.89	T	0.277778	TC	TC	TC	TC	CC	TC	CC	TC	TC	TC	TC	CC	TC	CC	TC	TC	CC	TC	CC	TT	TC	TT	TT	CC	TC	TC	TC	TC	CC	TT	TT	TC	CC	TC	TC	CC	TC	CC	CC	TT	TC	CC	CC	TT
Gm02_5836803	Gm02	5836803	263.19	A	0.290598	AG	AG	AG	AG	AA	AG	AA	AG	AG	AG	AG	AA	AG	AA	AG	AG	AA	AG	AA	GG	AG	GG	GG	AA	AG	AG	AG	AG	AA	GG	GG	AG	AA	AG	AG	AA	AG	AA	AA	GG	AG	AA	AA	GG
Gm02_5836823	Gm02	5836823	263.63	C	0.282051	CT	CT	CT	CT	CC	CT	CC	CT	CT	CT	CT	CC	CT	CC	CT	CT	CC	CT	CC	TT	CT	TT	TT	CC	CT	CT	CT	CT	CC	TT	TT	CT	CC	CT	CT	CC	CT	CC	CC	TT	CT	CC	CC	TT
Gm02_3426872	Gm02	3426872	283.46	A	0.239316	AA	AG	AG	AA	AA	GG	AG	AG	AG	AG	AG	AA	AG	AA	AG	AG	AA	GG	AG	AG	GG	GG	AG	AG	AG	GG	AG	AG	AA	GG	GG	AG	AA	AG	AG	AG	AG	AA	AG	AG	AG	AA	AG	GG
Gm02_3320891	Gm02	3320891	285.87	A	0.260684	AA	AG	AG	AA	AA	GG	AG	AG	AG	AG	AG	AA	AG	AA	AG	AG	AA	GG	AG	AG	GG	GG	AG	AG	AG	GG	AG	AG	AA	GG	GG	AG	AA	AG	AG	AG	AG	AA	AG	AG	AG	AA	AG	GG
Gm02_3320904	Gm02	3320904	286.73	A	0.260684	AA	AT	AT	AA	AA	TT	AT	AT	AT	AT	AT	AA	AT	AA	AT	AT	AA	TT	AT	AT	TT	TT	AT	AT	AT	TT	AT	AT	AA	TT	TT	AT	AA	AT	AT	AT	AT	AA	AT	AT	AT	AA	AT	TT
Gm02_3320908	Gm02	3320908	287.17	G	0.25641	GG	GA	GA	GG	GG	AA	GA	GA	GA	GA	GA	GG	GA	GG	GA	GA	GG	AA	GA	GA	AA	AA	GA	GA	GA	AA	GA	GA	GG	AA	AA	GA	GG	GA	GA	GA	GA	GG	GA	GA	GA	GG	GA	AA
Gm02_2189307	Gm02	2189307	294.4	A	0.264957	GG	AG	AG	GG	GG	AA	GG	AG	AG	AG	AG	GG	AG	AG	GG	AG	GG	AA	AG	AG	AA	AA	AG	AA	AG	AG	AG	AA	GG	AA	AA	AG	GG	AG	AG	AG	AA	GG	AG	AG	AG	GG	AG	AA
Gm02_1739583	Gm02	1739583	297.93	T	0.269231	TT	TT	TT	TT	TT	AA	TT	TA	TA	TA	TA	TA	TA	TA	TT	TA	TT	AA	TA	TA	AA	AA	TA	AA	TA	TA	TA	AA	TT	AA	AA	TA	TT	TA	TA	TA	AA	TT	TA	TA	AA	TT	TA	AA
Gm02_1739544	Gm02	1739544	299.24	T	0.277778	TT	TT	TT	TT	TT	AA	TT	TA	TA	TA	TT	TA	TA	TA	TT	TA	TT	AA	TA	TA	AA	AA	TA	AA	TA	TA	TA	AA	TT	AA	AA	TA	TT	TA	TA	TA	AA	TT	TA	TA	AA	TT	TA	AA
Gm02_815809	Gm02	815809	308.14	T	0.264957	TT	TG	TT	TT	TG	GG	TT	TG	TG	TG	TG	TG	TG	TG	TG	TG	TT	GG	TG	TG	GG	GG	TG	GG	TG	TG	TG	GG	TT	GG	GG	TG	TT	TG	TG	TG	GG	TT	TG	TG	GG	TT	GG	GG
Gm02_683898	Gm02	683898	308.58	C	0.260684	CC	CT	CC	CC	CT	TT	CC	CT	CT	CT	CT	CT	CT	CT	CT	CT	CC	TT	CT	CT	TT	TT	CT	TT	CT	CT	CT	TT	CC	TT	TT	CT	CC	CT	CT	CT	TT	CC	CT	CT	TT	CC	TT	TT
Gm02_901874	Gm02	901874	309.88	T	0.269231	TT	TC	TT	TT	TC	CC	TT	TC	TC	TC	TC	TC	TC	TC	TC	TC	TT	CC	TC	TC	CC	CC	TC	CC	TC	TC	TC	CC	TT	CC	CC	TC	TT	TC	TC	TC	CC	TT	TC	TC	CC	TT	CC	CC
Gm03_1546787	Gm03	1546787	0	C	0.277778	AA	CC	CC	CA	AA	CA	CA	CA	CA	CC	CA	CC	AA	CC	CA	AA	CA	AA	CC	CA	AA	CA	AA	CA	CA	CC	AA	CA	CA	AA	AA	CC	CC	CA	CA	CA	CA	CC	CA	CC	CC	AA	CC	CA
Gm03_1605447	Gm03	1605447	6.73	A	0.320513	AA	GG	GG	AG	AA	AG	AG	AA	AG	GG	AG	AA	AA	GG	AA	AA	AG	AA	GG	AA	AA	AG	AA	AG	AG	GG	AA	AA	AG	AA	AA	GG	GG	AA	AG	AA	AA	GG	AA	GG	GG	AA	GG	AG
Gm03_2470025	Gm03	2470025	15.09	C	0.294872	CC	TT	TT	CC	CC	CT	CT	CC	CT	TT	CT	CC	CC	TT	CC	CC	TT	CT	TT	CC	CT	CT	CC	CT	CT	TT	CC	CC	CT	CT	CC	TT	TT	CC	CT	CC	CC	TT	CC	TT	TT	CC	TT	TT
Gm03_2781441	Gm03	2781441	15.31	G	0.294872	GG	AA	AA	GG	GG	GA	GA	GG	GA	AA	GA	GG	GG	AA	GG	GG	AA	GA	AA	GG	GA	GA	GG	GA	GA	AA	GG	GG	GA	GA	GG	AA	AA	GG	GA	GG	GG	AA	GG	AA	AA	GG	AA	AA
Gm03_2985499	Gm03	2985499	15.74	C	0.290598	CC	TT	TT	CC	CC	CT	CT	CC	CT	TT	CT	CC	CC	TT	CC	CC	TT	CT	TT	CC	CT	CT	CC	CT	CT	TT	CC	CC	CT	CT	CC	TT	TT	CC	CT	CC	CC	TT	CC	TT	TT	CC	TT	TT
Gm03_3178093	Gm03	3178093	16.61	A	0.282051	TT	AA	AA	TT	TT	AT	AT	TT	AT	AA	AT	TT	TT	AA	TT	TT	AA	AT	AA	TT	AT	AT	TT	AT	AT	AA	TT	TT	AT	AT	TT	AA	AA	TT	AT	TT	TT	AA	TT	AA	AA	TT	AA	AA
Gm03_3269673	Gm03	3269673	17.26	T	0.282051	CC	TT	TT	CC	CC	TC	TC	CC	TC	TT	TC	CC	CC	TT	CC	CC	TT	TC	TT	CC	TC	TC	CC	TC	TC	TT	CC	CC	TC	TC	CC	TT	TT	CC	TC	CC	CC	TT	CC	TT	TT	CC	TT	TT
Gm03_5249984	Gm03	5249984	24.46	A	0.273504	GG	AA	AA	AG	GG	AG	AG	GG	AG	AA	GG	GG	GG	AG	GG	GG	AG	AG	AA	GG	AG	AG	AG	AG	AG	AG	GG	GG	AG	AG	GG	AA	AA	GG	AG	GG	GG	AA	GG	AG	AA	GG	AA	AA
Gm03_5405523	Gm03	5405523	28.2	G	0.286325	AA	GG	GG	AG	AA	AG	AG	AG	AG	GG	AA	GG	AA	AG	AG	AA	AG	AG	GG	AG	AG	AG	AG	AG	AG	AG	AA	AA	AG	AG	AA	GG	GG	AG	AG	AA	AG	GG	AA	AG	GG	AA	GG	GG
Gm03_5082845	Gm03	5082845	29.07	G	0.294872	AA	GG	GG	AA	AA	GA	GA	GA	GA	GG	AA	GG	AA	GA	GA	AA	GA	GA	GG	GA	GA	GA	GA	GA	GA	GA	AA	AA	GA	GA	AA	GG	GG	GA	GA	GA	GA	GG	AA	GA	GG	AA	GG	GG
Gm03_4702349	Gm03	4702349	29.5	G	0.299145	GG	AA	AA	GG	GG	GA	GA	GA	GA	AA	GG	AA	GG	GA	GA	GG	AA	GA	AA	GA	GA	GA	GA	GA	GA	GA	GG	GG	GA	GA	GG	AA	AA	GA	GA	GA	GA	AA	GG	GA	AA	GG	AA	AA
Gm03_5246077	Gm03	5246077	30.59	T	0.286325	TT	CC	CC	TC	TT	TC	TC	TC	TC	CC	TT	CC	TT	TC	TC	TT	TC	TC	CC	TC	TC	TC	TC	TC	TC	TC	TT	TT	TC	TC	TT	CC	CC	TC	TC	TC	TC	CC	TT	TC	CC	TT	CC	CC
Gm03_5405518	Gm03	5405518	30.81	G	0.290598	AA	GG	GG	GA	AA	GA	GA	GA	GA	GG	AA	GG	AA	GA	GA	AA	GA	GA	GG	GA	GA	GA	GA	GA	GA	GA	AA	AA	GA	GA	AA	GG	GG	GA	GA	AA	GA	GG	AA	GA	GG	AA	GG	GG
Gm03_5584139	Gm03	5584139	31.24	C	0.286325	CC	TT	TT	CT	CC	CT	CT	CT	CT	TT	CC	TT	CC	CT	CT	CC	CT	CT	TT	CT	CT	CT	CT	CT	CT	CT	CC	CC	CT	CT	CC	TT	TT	CT	CT	CC	CT	TT	CC	CT	TT	CC	TT	TT
Gm03_5584255	Gm03	5584255	31.68	A	0.286325	AA	GG	GG	AG	AA	AG	AG	AG	AG	GG	AA	GG	AA	AG	AG	AA	AG	AG	GG	AG	AG	AG	AG	AG	AG	AG	AA	AA	AG	AG	AA	GG	GG	AG	AG	AA	AG	GG	AA	AG	GG	AA	GG	GG
Gm03_5905963	Gm03	5905963	31.89	G	0.282051	GG	AA	AA	GA	GG	GA	GA	GA	GA	AA	GG	AA	GG	GA	GA	GG	GA	GA	AA	GA	GA	GA	GA	GA	GA	GA	GG	GG	GA	GA	GG	AA	AA	GA	GA	GG	GA	AA	GG	GA	AA	GG	AA	AA
Gm03_6249431	Gm03	6249431	32.54	A	0.269231	GG	AA	AA	AG	GG	AG	AG	AG	AG	AA	GG	AA	GG	AG	AG	GG	AG	AG	AA	AG	AG	AG	AG	AG	AG	AG	GG	GG	AG	AG	GG	AA	AA	AG	AG	GG	AG	AA	GG	AG	AA	GG	AA	AA
Gm03_6250550	Gm03	6250550	32.98	G	0.273504	AA	GG	GG	GA	AA	GA	GA	GA	GA	GG	AA	GG	AA	GA	GA	AA	GA	GA	GG	GA	GA	GA	GA	GA	GA	GA	AA	AA	GA	GA	AA	GG	GG	GA	GA	AA	GA	GG	AA	GA	GG	AA	GG	GG
Gm03_6250547	Gm03	6250547	33.19	G	0.269231	AA	GG	GG	GA	AA	GA	GA	GA	GA	GG	AA	GG	AA	GA	GA	AA	GA	GA	GG	GA	GA	GA	GA	GA	GA	GA	AA	AA	GA	GA	AA	GG	GG	GA	GA	AA	GA	GG	AA	GA	GG	AA	GG	GG
Gm03_6670926	Gm03	6670926	34.28	A	0.264957	GG	AA	AA	AG	GG	AG	AG	AG	AG	AA	GG	AA	GG	AG	AG	GG	AG	AG	AA	AG	AG	AG	AG	AG	AG	AG	GG	GG	AG	AG	AA	AA	AA	AG	AG	GG	AG	AA	GG	AG	AA	GG	AA	AA
Gm03_6623792	Gm03	6623792	34.71	A	0.260684	CC	AA	AA	AC	CC	AC	AC	AC	AC	AA	CC	AA	CC	AC	AC	CC	AC	AC	AA	AC	AC	AC	AC	AC	AC	AC	CC	CC	AC	AC	CC	AA	AA	AC	AC	CC	AC	AA	CC	AC	AA	CC	AA	AA
Gm03_14566198	Gm03	14566198	37.13	G	0.252137	GG	AA	AA	GA	GG	GA	GA	GA	GA	GA	GG	AA	GG	GA	GA	GG	GA	GA	AA	GA	GA	GA	GA	GA	GA	GA	GG	GG	GA	GA	GG	GA	AA	GA	GA	GG	GA	AA	GG	GA	AA	GG	GA	AA
Gm03_13514530	Gm03	13514530	37.56	C	0.252137	CC	TT	TT	CT	CC	CT	CT	CT	CT	CT	CC	TT	CC	CT	CT	CC	CT	CT	TT	CC	CT	CT	CT	CT	CT	CT	CC	CC	CT	CT	CC	CT	TT	CT	CT	CC	CT	TT	CC	CT	TT	CC	CT	TT
Gm03_32340808	Gm03	32340808	46.78	A	0.252137	GG	AG	AA	AG	GG	AG	AG	AG	AA	AG	GG	AA	GG	AG	AG	GG	AG	AG	AG	GG	AG	AG	AA	AG	AG	AG	GG	GG	AG	AG	GG	AA	AG	AG	GG	GG	AG	AA	GG	AG	AG	GG	AG	AA
Gm03_32340832	Gm03	32340832	47.22	A	0.260684	GG	AG	AA	AG	GG	AG	AG	AG	AA	AG	GG	AA	GG	AG	AG	GG	AG	AG	AG	GG	AG	AG	AA	AG	AG	AG	GG	GG	AG	AG	GG	AA	AG	AG	GG	GG	AG	AA	GG	AG	AG	GG	AG	AA
Gm03_32418290	Gm03	32418290	48.96	C	0.264957	AA	CA	CC	CA	AA	CA	CA	CA	CC	CA	AA	CC	AA	CA	CA	AA	CA	CA	CA	AA	CA	CA	CC	CA	CA	CA	AA	AA	CA	CA	AA	CC	CA	CA	AA	AA	CA	CC	AA	CA	CA	AA	CA	CC
Gm03_32649378	Gm03	32649378	50.27	T	0.247863	GG	TG	TT	TG	GG	TG	TG	TG	TT	TG	GG	TT	GG	TG	TG	GG	TG	TG	TG	GG	TG	TG	TT	TG	TG	TG	GG	GG	TG	TG	GG	TT	TG	TG	GG	GG	TG	TT	GG	TG	TG	GG	TG	TT
Gm03_32809310	Gm03	32809310	51.58	A	0.269231	GG	AG	AA	AG	GG	AG	AG	AG	AA	AG	GG	AA	GG	AG	AG	GG	AG	AG	AG	GG	GG	AG	AA	AG	AG	AG	GG	GG	AG	AG	GG	AA	AG	AG	GG	GG	AG	AA	GG	AG	AG	GG	AG	AA
Gm03_32886718	Gm03	32886718	54.49	A	0.311966	GG	AG	AA	AG	GG	AG	AG	AG	AA	AG	GG	AA	GG	AG	AG	GG	AG	AG	AA	GG	GG	GG	AA	AG	AG	AG	GG	GG	AG	AG	GG	AA	AG	AG	GG	GG	AG	AA	GG	AA	AG	GG	AA	AA
Gm03_32886721	Gm03	32886721	56.04	T	0.303419	GG	TG	TT	TG	GG	TG	TG	TG	TT	TG	GG	TT	GG	TG	TG	GG	TG	TG	TT	GG	GG	GG	TT	TG	TG	TG	GG	GG	TG	TG	GG	TT	TG	TG	GG	GG	TG	TT	GG	TT	TG	GG	TT	TT
Gm03_33011045	Gm03	33011045	58.71	C	0.264957	TT	CT	CC	CT	TT	CT	CT	CT	CC	CT	TT	CC	TT	CT	CT	TT	CT	CT	CT	TT	TT	CT	CC	CT	CT	CT	TT	TT	CT	CT	TT	CC	CT	CT	TT	TT	CT	CC	TT	CT	CT	TT	CT	CC
Gm03_33219209	Gm03	33219209	59.36	A	0.260684	GG	AG	AA	AG	GG	AG	AG	AG	AA	AG	GG	AA	GG	AG	AG	GG	AG	AG	AG	GG	GG	AG	AA	AG	AG	AG	GG	GG	AG	AG	GG	AA	AG	AG	GG	GG	AG	AA	GG	AG	AG	AG	AG	AA
Gm03_33513534	Gm03	33513534	61.56	A	0.264957	GG	AG	AA	AG	GG	AG	AG	AG	AA	AG	GG	AA	AG	AG	AG	AG	AG	AG	AG	GG	GG	AG	AA	AG	GG	AG	GG	GG	AG	AG	GG	AA	AG	AG	GG	GG	AG	AA	GG	AG	AG	AG	AG	AA
Gm03_33521850	Gm03	33521850	62.22	T	0.252137	CC	TC	TT	TC	CC	TC	TC	TC	TT	TC	CC	TT	TC	TC	TC	TC	TC	TC	TC	CC	CC	TC	TT	TC	CC	TC	CC	CC	TC	TC	CC	TT	TC	TC	CC	CC	TC	TT	CC	TC	TC	TC	TC	TT
Gm03_33766861	Gm03	33766861	63.75	G	0.264957	AA	GA	GG	GA	AA	GA	GA	GA	GG	GA	AA	GG	GA	GG	GA	GA	GA	GA	GA	AA	AA	GA	GG	GA	AA	GA	AA	AA	GA	GA	AA	GG	GA	GA	AA	AA	GA	GG	AA	GA	GA	GA	GA	GG
Gm03_33766928	Gm03	33766928	64.18	C	0.273504	TT	CT	CC	CT	TT	CT	CT	CT	CC	CT	TT	CC	CT	CC	CT	CT	CT	CT	CT	TT	TT	CT	CC	CT	TT	CT	TT	TT	CT	CT	TT	CC	CT	CT	TT	TT	CT	CC	TT	CT	CT	CT	CC	CC
Gm03_33976617	Gm03	33976617	65.49	G	0.252137	AA	GA	GG	GA	AA	GA	GA	GA	GG	GA	AA	GG	GA	GA	GA	GA	GA	GA	GA	AA	AA	GA	GG	GA	AA	GA	AA	AA	GA	GA	AA	GG	GA	GA	AA	AA	GA	GG	AA	GA	GA	GA	GA	GG
Gm03_34446035	Gm03	34446035	68.8	G	0.260684	AA	GA	GG	GA	AA	GG	GA	GA	GG	GA	AA	GG	GA	GA	GA	GA	GA	GA	GA	AA	AA	GA	GG	GA	AA	AA	AA	AA	GA	GA	AA	GG	GA	GA	AA	AA	GA	GG	AA	GA	GA	GA	GG	GG
Gm03_34446062	Gm03	34446062	69.23	A	0.25641	CC	AC	AA	AC	CC	AA	AC	AC	AA	AC	CC	AA	AC	AC	AC	AC	AC	AC	AC	CC	CC	AC	AA	AC	CC	CC	CC	CC	AC	AC	CC	AA	AC	AC	CC	CC	AC	AA	CC	AC	AC	AC	AA	AA
Gm03_34881083	Gm03	34881083	71.64	C	0.264957	TT	CT	CC	CT	TT	CC	TT	CT	CC	CT	TT	CC	CT	CT	CT	CT	CT	CT	CT	TT	TT	CT	CC	CT	TT	TT	TT	TT	CT	CT	TT	CC	CT	CT	TT	TT	CT	CC	TT	CT	CT	CT	CC	CC
Gm03_34791980	Gm03	34791980	75.97	G	0.269231	TT	GT	GG	GT	TT	GG	TT	TT	GG	TT	TT	GG	GT	GT	GT	GT	GT	GT	GT	TT	TT	GT	GG	GT	TT	TT	TT	TT	GT	GT	TT	GG	GT	GT	TT	TT	GT	GG	TT	GT	GT	GT	GG
Gm03_34791979	Gm03	34791979	76.19	A	0.273504	CC	AC	AA	AC	CC	AA	CC	CC	AA	CC	CC	AA	AC	AC	AC	AC	AC	AC	AC	CC	CC	AC	AA	AC	CC	CC	CC	CC	AC	AC	CC	AA	AC	AC	CC	CC	AC	AA	CC	AC	AC	AC	AA
Gm03_34791890	Gm03	34791890	77.98	A	0.264957	GG	AG	AA	AG	GG	AA	GG	GG	AA	GG	GG	AA	AG	AG	AG	AG	AG	AG	AG	GG	GG	AG	AA	AG	GG	GG	GG	GG	AG	AG	GG	AA	AG	AG	GG	GG	AG	AA	GG	AG	AG	AG	AA
Gm03_34791879	Gm03	34791879	78.65	T	0.269231	CC	TC	TT	TC	CC	TT	CC	CC	TT	CC	CC	TT	TC	TC	TC	TC	TC	TC	TC	CC	CC	TC	TT	TC	CC	CC	CC	CC	TC	TC	CC	TT	TC	TC	CC	CC	TC	TT	CC	TC	TC	TC	TT
Gm03_34791858	Gm03	34791858	78.87	A	0.273504	GG	AG	AA	AG	GG	AA	GG	GG	AA	GG	GG	AA	AG	AG	AG	AG	AG	AG	AG	GG	GG	AG	AA	AG	GG	GG	GG	GG	AG	AG	GG	AA	AG	AG	GG	GG	AG	AA	GG	AG	AG	AG	AA
Gm03_33976625	Gm03	33976625	84.09	C	0.290598	TT	CT	CC	CT	TT	CT	CT	TT	CC	TT	TT	CC	CT	CT	CT	CT	CT	CT	CT	TT	TT	CT	CC	CT	TT	CT	TT	TT	CT	CT	TT	CC	CT	CT	TT	TT	CT	CC	TT	CT	CT	CT	CT	TT
Gm03_33852551	Gm03	33852551	84.31	C	0.286325	TT	CT	CC	CT	TT	CT	CT	TT	CC	TT	TT	CC	CT	CT	CT	CT	CT	CT	CT	TT	TT	CT	CC	CT	TT	CT	TT	TT	CT	CT	TT	CC	CT	CT	TT	TT	CT	CC	TT	CT	CT	CT	CT	TT
Gm03_33766876	Gm03	33766876	84.96	T	0.286325	CC	TC	TT	TC	CC	TC	TC	CC	TT	CC	CC	TT	TC	TT	TC	TC	TC	TC	TC	CC	CC	TC	TT	TC	CC	TC	CC	CC	TC	TC	CC	TT	TC	TC	CC	CC	TC	TT	CC	TC	TC	TC	TC	CC
Gm03_35684571	Gm03	35684571	98.1	G	0.333333	GG	GA	AA	GA	GG	AA	GG	GG	AA	GG	GG	GA	GA	AA	GA	GG	GA	GA	GA	GG	GG	GA	AA	GA	GG	GG	GG	GG	GA	AA	GG	AA	GA	GA	GG	GG	AA	AA	GA	GA	GA	GG	AA	GG
Gm03_35684598	Gm03	35684598	98.53	T	0.324786	TT	TC	CC	TC	TT	CC	TT	TT	CC	TT	TT	TC	TC	CC	TC	TT	TC	TC	TC	TT	TT	TC	CC	TC	TT	TT	TT	TT	TC	CC	TT	CC	TC	TC	TT	TT	CC	CC	TC	TC	TC	TT	CC	TT
Gm03_35684595	Gm03	35684595	98.97	A	0.316239	AA	AG	GG	AG	AA	GG	AA	AA	GG	AA	AA	AG	AG	GG	AG	AA	AG	AG	AG	AA	AA	AG	GG	AG	AA	AA	AA	AA	AG	GG	AA	GG	AG	AG	AA	AA	GG	GG	AG	AG	AG	AA	GG	AA
Gm03_35684634	Gm03	35684634	99.62	A	0.320513	AA	AG	GG	AG	AA	GG	AA	AA	GG	AA	AA	AG	AG	GG	AG	AG	AG	AG	AG	AA	AA	AG	GG	AG	AA	AA	AA	AA	AG	GG	AA	GG	AG	AG	AA	AA	GG	GG	AG	AG	AG	AA	GG	AA
Gm03_35684622	Gm03	35684622	99.84	G	0.324786	GG	GA	AA	GA	GG	AA	GG	GG	AA	GG	GG	GA	GA	AA	GA	GA	GA	GA	GA	GG	GG	GA	AA	GA	GG	GG	GG	GG	GA	AA	GG	AA	GA	GA	GG	GG	AA	AA	GA	GA	GA	GG	AA	GG
Gm03_35793189	Gm03	35793189	100.92	A	0.320513	AA	AT	TT	AT	AA	TT	AA	AA	TT	AA	AA	AT	AT	TT	AT	AT	AT	AT	AT	AA	AA	AT	TT	AT	AA	AA	AA	AA	AT	TT	AA	TT	AT	AT	AA	AA	TT	TT	AT	AT	AT	AA	TT	AA
Gm03_35972598	Gm03	35972598	103.78	C	0.333333	CC	CT	TT	CT	CC	CT	CC	CC	TT	CC	CC	CT	CT	TT	CT	CT	CT	CT	CT	CC	CC	CT	TT	CT	CC	CC	CC	CC	CT	TT	CC	TT	CT	CT	CC	CC	TT	TT	CT	CT	CT	CC	CT	CC
Gm03_36449580	Gm03	36449580	106.41	T	0.320513	CC	TC	TT	TC	CC	TC	TC	CC	TT	CC	TC	TC	TC	TT	TC	TC	TC	TC	TC	CC	CC	TC	TT	TC	CC	CC	CC	CC	TC	TT	CC	TT	TC	CC	CC	TC	TT	TC	TC	TC	TC	TC	TC	CC
Gm03_38390414	Gm03	38390414	121.67	T	0.324786	TC	TC	TT	CC	CC	TC	TC	CC	TT	CC	TT	TC	TC	TT	TC	TC	TT	TC	TC	TC	CC	CC	TC	TC	CC	CC	TC	CC	TC	TC	CC	TT	TC	CC	CC	TC	TT	TC	TC	TC	CC	TC	TC	CC
Gm03_38532091	Gm03	38532091	121.89	G	0.320513	GC	GC	GG	CC	CC	GC	GC	CC	GG	CC	GG	GC	GC	GG	GC	GC	GG	GC	GC	GC	CC	CC	GC	GC	CC	CC	GC	CC	GC	GC	CC	GG	GC	CC	CC	GC	GG	GC	GC	GC	CC	GC	GC	CC
Gm03_38755715	Gm03	38755715	122.32	C	0.320513	CT	CT	CC	TT	TT	CT	CT	TT	CC	TT	CC	CT	CT	CC	CT	CT	CC	CT	CT	CT	TT	TT	CT	CT	TT	TT	CT	TT	CT	CT	TT	CC	CT	TT	TT	CT	CC	CT	CC	CT	TT	CT	CT	TT
Gm03_38954396	Gm03	38954396	122.54	C	0.32906	CT	CT	TT	CC	CC	CT	CT	CC	TT	CC	TT	CT	CT	TT	CT	CT	TT	CT	CT	CT	CC	CC	CT	CT	CC	CC	CT	CC	CT	CT	CC	TT	CT	CC	CC	CT	TT	CT	TT	CT	CC	CT	CT	CC
Gm03_39271467	Gm03	39271467	123.4	G	0.320513	GT	GT	GG	TT	TT	GT	GT	TT	GG	TT	GG	GT	GT	GG	GT	GT	GG	GT	GT	GT	TT	TT	GT	GT	TT	TT	GT	TT	GT	GT	TT	GG	GT	GT	TT	GT	GG	GT	GG	GT	TT	GT	GT	TT
Gm03_40209966	Gm03	40209966	131.79	C	0.307692	CT	CT	CC	TT	TT	CT	CT	CC	CC	TT	CC	CT	CT	CC	CT	CT	CC	CT	CT	CC	CT	CT	CC	CT	TT	TT	CT	CT	CT	CT	TT	CC	CT	CT	TT	CT	CC	CT	CC	CT	TT	CT	CT	TT
Gm03_40209991	Gm03	40209991	132.88	T	0.311966	TC	TC	TT	CC	CC	TC	TC	TT	TT	CC	TT	TC	TC	TT	TC	TC	TT	TC	TC	TT	TC	TC	TT	TC	CC	CC	TC	TC	TC	TC	CC	TT	TC	TC	CC	TC	TT	TC	TT	TC	CC	TC	TC	CC
Gm03_40126159	Gm03	40126159	135.28	T	0.311966	TC	TC	TT	CC	CC	TC	TC	TT	TT	CC	TT	TC	TC	TT	TC	TC	TT	TC	TC	TT	TC	TC	TT	TC	CC	CC	TC	TC	TC	TC	CC	TT	TC	TC	CC	TC	TT	TC	TT	TC	CC	TC	TC	CC
Gm03_40296915	Gm03	40296915	136.81	C	0.299145	CT	CT	CC	TT	TT	CT	CT	CC	CC	TT	CC	CT	CT	CC	CT	CT	CC	CT	CT	CC	CT	CT	CC	CT	TT	TT	CT	CT	CT	CT	TT	CC	CT	CT	TT	CT	CC	CT	CC	CT	TT	CT	CT	TT
Gm03_42471203	Gm03	42471203	160.31	A	0.299145	AT	AT	TT	AT	AA	AT	AT	TT	TT	AT	TT	TT	AT	TT	AT	AT	AA	AA	AT	TT	AT	AT	AT	AT	AA	AA	AT	AT	AT	AT	AA	TT	TT	TT	AA	AT	TT	AT	TT	TT	TT	AT	AT	AA
Gm03_42874678	Gm03	42874678	162.06	G	0.286325	GC	GC	CC	GC	GG	GC	GC	CC	CC	GC	CC	CC	GC	CC	GC	GC	GG	GG	GC	CC	GC	GC	GC	GC	GG	GG	GC	GC	GC	GC	GG	CC	CC	CC	GG	GC	CC	GC	CC	CC	CC	GC	GG	GG
Gm03_42874728	Gm03	42874728	162.28	C	0.286325	CT	CT	TT	CT	CC	CT	CT	TT	TT	CT	TT	TT	CT	TT	CT	CT	CC	CC	CT	TT	CT	CT	CT	CT	CC	CC	CT	CT	CT	CT	CC	TT	TT	TT	CC	CT	TT	CT	TT	TT	TT	CT	CC	CC
Gm03_43631338	Gm03	43631338	165.81	C	0.294872	CT	CT	TT	CT	CC	CT	CT	CT	TT	CT	TT	TT	TT	TT	CT	CT	CC	CC	TT	TT	CT	CT	CT	CT	CT	CC	CT	CT	CT	CT	CC	TT	TT	TT	CC	CT	TT	CT	TT	TT	TT	TT	CC	CC
Gm03_43663870	Gm03	43663870	166.03	A	0.294872	AG	AG	GG	AG	AA	AG	AG	AG	GG	AG	GG	GG	GG	GG	AG	AG	AA	AA	GG	GG	AG	AG	AG	AG	AG	AA	AG	AG	AG	AG	AA	GG	GG	GG	AA	AG	GG	AG	GG	GG	GG	GG	AA	AA
Gm03_43801657	Gm03	43801657	167.12	T	0.294872	TG	TG	GG	TG	TT	TG	TG	TG	GG	TG	GG	GG	GG	GG	TG	TG	TT	TT	TG	GG	TG	TG	TG	TG	TG	TT	TG	TG	TG	TG	TT	GG	GG	GG	TT	TG	GG	TG	GG	GG	GG	GG	TT	TT
Gm03_45353985	Gm03	45353985	176.56	A	0.269231	AG	AG	AG	AG	AA	AG	AG	AG	GG	AG	AG	GG	GG	AG	GG	AA	AA	AA	AG	GG	AG	AG	AG	AG	AG	AA	AG	AG	AG	AG	AA	GG	GG	GG	AG	AG	GG	AG	GG	GG	GG	GG	AA	AA
Gm03_45076154	Gm03	45076154	178.31	C	0.273504	CT	CT	CT	CT	CC	CT	CT	CT	TT	CT	CT	TT	TT	CT	TT	CC	CC	CC	CT	TT	CT	CT	CT	CT	CT	CC	CT	CT	CT	CT	CC	TT	TT	TT	CT	CT	TT	CT	TT	TT	TT	TT	CC	CC
Gm03_44375871	Gm03	44375871	194.96	T	0.333333	TA	TA	AA	TA	TT	TA	TA	TA	AA	TT	AA	TT	AA	AA	TT	TA	TT	TT	TA	TT	TA	TA	TA	TA	TA	TT	TA	TA	TA	TA	TT	AA	AA	TT	TA	TT	TT	TA	TT	AA	AA	AA	TT	TT
Gm03_44092577	Gm03	44092577	195.83	T	0.32906	TA	TA	AA	TA	TT	TA	TA	TA	AA	TT	AA	TT	AA	AA	TT	TA	TT	TT	TA	TT	TA	TA	TA	TA	TA	TT	TA	TA	TA	TA	TT	AA	AA	TT	TT	TT	TT	TA	TT	AA	AA	AA	TT	TT
Gm03_44173340	Gm03	44173340	196.05	T	0.324786	TA	TA	AA	TA	TT	TA	TA	TA	AA	TT	AA	TT	AA	AA	TT	TA	TT	TT	TA	TT	TA	TA	TA	TA	TA	TT	TA	TA	TA	TA	TT	AA	AA	TT	TA	TT	TT	TA	TT	AA	AA	AA	TT	TT
Gm03_12736208	Gm03	12736208	257.93	T	0.324786	CC	CC	TC	TC	TC	TC	TT	TT	CC	CC	CC	TC	TC	TC	TC	CC	TC	TT	TT	TC	TC	TC	TT	CC	TC	TC	TT	CC	CC	CC	TC	TC	TC	TC	TT	TT	TT	TC	CC	CC	TT	CC	CC	CC
Gm03_12736236	Gm03	12736236	258.15	T	0.324786	GG	GG	TG	TG	TG	TG	TT	TT	GG	GG	GG	TG	TG	TG	TG	GG	TG	TT	TT	TG	TG	TG	TT	GG	TG	TG	TT	GG	GG	GG	TG	TG	TG	TG	TT	TT	TT	TG	GG	GG	TT	GG	GG	GG
Gm04_51315033	Gm04	51315033	0	G	0.247863	GA	GA	AA	GA	GA	GA	AA	GA	GG	GG	GG	AA	AA	GA	GA	GA	AA	GA	GA	GG	GG	GG	GA	GA	AA	GA	GA	GA	GG	GG	GA	GA	GA	GA	GA	GG	GG	AA	GA	GG	AA	GA	GG	GG
Gm04_51139558	Gm04	51139558	0.87	A	0.239316	AT	AT	AA	AT	AT	AT	AA	AT	AT	TT	TT	AA	AA	AT	AT	AT	AA	AT	AT	TT	TT	TT	AT	AT	AA	AT	AT	AT	TT	TT	AT	AT	AT	AT	AT	TT	TT	AA	AT	TT	AA	AT	TT	TT
Gm04_50203876	Gm04	50203876	9.57	A	0.25641	AG	AG	GG	AG	AG	AG	GG	GG	AG	AA	AA	GG	GG	AA	GG	AG	GG	AG	AA	AA	AA	AA	AG	AG	GG	AG	AG	AA	AA	AA	AG	AG	AG	AG	AG	AA	AA	AG	AG	AA	GG	AG	AA	AA
Gm04_50079440	Gm04	50079440	10	G	0.25641	GA	GA	AA	GA	GA	GA	AA	AA	GA	GG	GG	AA	AA	GG	AA	GA	AA	GA	GG	GG	GG	GG	GA	GA	AA	GA	GA	GG	GG	GG	GA	GA	GA	GA	GA	GG	GG	GA	GA	GG	AA	GA	GG	GG
Gm04_49773502	Gm04	49773502	11.75	C	0.264957	CT	CT	TT	CT	CT	CT	TT	TT	CT	CC	CC	TT	TT	CC	TT	CT	TT	CT	CC	CC	CC	CC	CT	CT	TT	CT	CT	CC	CC	CC	CT	CT	CT	CT	CT	CC	CC	CT	CT	CC	TT	CT	CC	CC
Gm04_49689098	Gm04	49689098	12.19	G	0.260684	GT	GT	TT	GT	GT	GT	TT	TT	GT	GG	GG	TT	TT	GG	GT	GT	TT	GT	GG	GG	GG	GG	GT	GT	TT	GT	GT	GG	GG	GG	GT	GT	GT	GT	GT	GG	GG	GT	GT	GG	TT	GT	GG	GG
Gm04_17920014	Gm04	17920014	61.86	G	0.316239	GA	GG	AA	GA	GG	GA	AA	GA	GA	GA	GG	GA	GG	GG	GG	AA	GG	AA	GA	GA	GG	GG	GG	GA	GA	GA	GA	GA	GA	AA	GA	GA	GA	GG	GA	GG	GA	GG	AA	GG	GG	GA	GG	GA
Gm04_17920031	Gm04	17920031	62.08	A	0.320513	AG	AA	GG	AG	AA	AG	GG	AG	AG	AG	AA	AG	AA	AA	AA	GG	AA	GG	AG	AG	AA	AA	AA	AG	AG	AG	AG	AG	AG	GG	AG	AG	AG	AA	AG	AA	AG	AA	GG	AA	AA	AG	AA	AG
Gm04_17920056	Gm04	17920056	62.73	A	0.316239	AG	AA	GG	AG	AA	AG	GG	AG	AG	AG	AA	AG	AA	AA	AA	GG	AA	GG	AG	AG	AA	AG	AA	AG	AG	AG	AG	AG	AG	GG	AG	AG	AG	AA	AG	AA	AG	AA	GG	AA	AA	AG	AA	AG
Gm04_17920077	Gm04	17920077	64.26	G	0.333333	GG	GG	AA	GA	GG	GA	AA	GA	GA	GA	GG	GG	GG	GG	GG	AA	GG	AA	GA	GA	GG	GA	GG	GA	GA	GA	GA	GA	GA	AA	GA	GA	GA	GG	GA	GG	GA	GG	AA	GG	GG	GA	GG	GA
Gm04_17693764	Gm04	17693764	67.56	C	0.282051	CT	CC	TT	CT	CT	CT	TT	CT	CT	CT	CC	CT	CC	CC	CC	TT	CC	TT	CT	CT	CC	CT	CC	CT	CT	CT	CT	CT	CT	TT	CT	CT	CT	CC	CT	CC	CT	CC	TT	CC	CC	CT	CC	CT
Gm04_16123663	Gm04	16123663	67.99	A	0.282051	AG	AA	GG	AG	AG	AG	GG	AG	AG	AG	AA	AG	AA	AA	AA	GG	AA	GG	AG	AG	AA	AG	AA	AG	AG	AG	AG	AG	AG	GG	AG	AG	AG	AA	AG	AA	AG	AA	GG	AA	AA	AG	AA	AG
Gm04_18043925	Gm04	18043925	68.43	A	0.273504	AG	AA	GG	AG	AG	AG	GG	AG	AG	AG	AA	AG	AA	AA	AA	GG	AA	GG	AG	AG	AA	AG	AA	AG	AG	AG	AG	AG	AG	GG	AG	AG	AG	AA	AG	AA	AG	AA	GG	AA	AA	AG	AA	AG
Gm04_16460914	Gm04	16460914	68.86	C	0.282051	CT	CC	TT	CT	CT	CT	TT	CT	CT	CT	CC	CT	CC	CC	CC	TT	CC	TT	CT	CT	CC	CT	CC	CT	CT	CT	CT	CT	CT	TT	CT	CT	CT	CC	CT	CC	CT	CC	TT	CC	CC	CT	CC	CT
Gm04_16460925	Gm04	16460925	69.29	G	0.282051	GT	GG	TT	GT	GT	GT	TT	GT	GT	GT	GG	GT	GG	GG	GG	TT	GG	TT	GT	GT	GG	GT	GG	GT	GT	GT	GT	GT	GT	TT	GT	GT	GT	GG	GT	GG	GT	GG	TT	GG	GG	GT	GG	GT
Gm04_16045341	Gm04	16045341	69.51	T	0.277778	TC	TT	CC	TC	TC	TC	CC	TC	TC	TC	TT	TC	TT	TT	TT	CC	TT	CC	TC	TC	TT	TC	TT	TC	TC	TC	TC	TC	TC	CC	TC	TC	TC	TT	TC	TT	TC	TT	CC	TT	TT	TC	TT	TC
Gm04_17142625	Gm04	17142625	70.16	A	0.290598	AG	AA	GG	AG	AG	AG	GG	AG	AG	AG	AA	AG	AA	AA	AA	GG	AA	GG	AG	AG	AA	AG	AA	AG	AG	AG	AG	AG	AG	GG	AG	AG	AG	AA	AG	AA	AG	AA	GG	AA	AA	AG	AA	AG
Gm04_16926049	Gm04	16926049	71.47	T	0.299145	TC	TT	CC	TC	TC	TC	CC	TC	TC	TC	TT	TC	TT	TT	TT	CC	TT	CC	TC	TC	TT	TC	TT	TC	TC	TC	TC	TC	TT	CC	TT	TC	TC	TT	TC	TT	TC	TT	CC	TT	TT	TC	TT	TC
Gm04_16232671	Gm04	16232671	74.8	G	0.333333	GC	GG	CC	GC	GC	GC	CC	GC	GC	GC	GG	GC	GG	GG	GG	CC	GG	CC	GC	GC	GG	GC	GG	GC	GC	GC	GC	GC	GC	CC	GC	GC	GC	GG	GC	GG	GC	GG	CC	GG	GG	GC	GG	GC
Gm04_13602766	Gm04	13602766	79.02	C	0.32906	CT	CC	TT	CT	CT	CT	TT	CT	CT	CT	CC	CT	CC	CC	CC	TT	CC	TT	CT	CT	CC	CT	CC	CT	CT	CT	CT	CT	CT	TT	CT	CC	CT	CC	CT	CC	CT	CC	TT	CC	CC	CT	CC	CT
Gm04_13602757	Gm04	13602757	80.11	C	0.324786	CT	CC	TT	CT	CT	CT	TT	CT	CT	CT	CC	CT	CC	CC	CC	TT	CC	TT	CT	CT	CC	CT	CC	CT	CT	CT	CT	CT	CT	TT	CT	CC	CT	CC	CT	CC	CT	CC	TT	CC	CC	CT	CC	CT
Gm04_13602746	Gm04	13602746	80.54	A	0.316239	AC	AA	CC	AC	AC	AC	CC	AC	AC	AC	AA	AC	AA	AA	AA	CC	AA	CC	AC	AC	AA	AC	AA	AC	AC	AC	AC	AC	AC	CC	AC	AA	AC	AA	AC	AA	AC	AA	CC	AA	AA	AC	AA	AC
Gm04_13602727	Gm04	13602727	82.29	G	0.290598	GA	GG	AA	GA	GA	GA	AA	GA	GA	GA	GG	GA	GG	GG	GG	AA	GG	AA	GA	GA	GG	GA	GG	GA	GA	GA	GA	GA	GA	AA	GA	GA	GA	GG	GA	GG	GA	GG	AA	GG	GG	GA	GG	GA
Gm04_13602719	Gm04	13602719	82.51	T	0.286325	TC	TT	CC	TC	TC	TC	CC	TC	TC	TC	TT	TC	TT	TT	TT	CC	TT	CC	TC	TC	TT	TC	TT	TC	TC	TC	TC	TC	TC	CC	TC	TC	TC	TT	TC	TT	TC	TT	CC	TT	TT	TC	TT	TC
Gm04_13295461	Gm04	13295461	82.94	C	0.286325	CT	CC	TT	CT	CT	CT	TT	CT	CT	CT	CC	CT	CC	CC	CC	TT	CC	TT	CT	CT	CC	CT	CC	CT	CT	CT	CT	CT	CT	TT	CT	CT	CT	CC	CT	CC	CT	CC	TT	CC	CC	CT	CC	CT
Gm04_13295475	Gm04	13295475	83.16	T	0.282051	TG	TT	GG	TG	TG	TG	GG	TG	TG	TG	TT	TG	TT	TT	TT	GG	TT	GG	TG	TG	TT	TG	TT	TG	TG	TG	TG	TG	TG	GG	TG	TG	TG	TT	TG	TT	TG	TT	GG	TT	TT	TG	TT	TG
Gm04_14253638	Gm04	14253638	83.37	C	0.286325	CT	CC	TT	CT	CT	CT	TT	CT	CT	CT	CC	CT	CC	CC	CC	TT	CC	TT	CT	CT	CC	CT	CC	CT	CT	CT	CT	CT	CT	TT	CT	CT	CT	CC	CT	CC	CT	CC	TT	CC	CC	CT	CC	CT
Gm04_14522740	Gm04	14522740	83.81	A	0.286325	AT	AA	TT	AT	AT	AT	TT	AT	AT	AT	AA	AT	AA	AA	AA	TT	AA	TT	AT	AT	AA	AT	AA	AT	AT	AT	AT	AT	AT	TT	AT	AT	AT	AA	AT	AA	AT	AA	TT	AA	AA	AT	AA	AT
Gm04_14253590	Gm04	14253590	84.02	T	0.282051	TG	TT	GG	TG	TG	TG	GG	TG	TG	TG	TT	TG	TT	TT	TT	GG	TT	GG	TG	TG	TT	TG	TT	TG	TG	TG	TG	TG	TG	GG	TG	TG	TG	TT	TG	TT	TG	TT	GG	TT	TT	TG	TT	TG
Gm04_14882782	Gm04	14882782	84.68	T	0.290598	TC	TT	CC	TC	TC	TC	CC	TC	TC	TC	TT	TC	TT	TT	TT	CC	TT	CC	TC	TC	TT	TC	TT	TC	TC	TC	TC	TC	TC	CC	TC	TC	TC	TT	TC	TT	TC	TT	CC	TT	TT	TC	TT	TC
Gm04_15167081	Gm04	15167081	85.98	C	0.286325	CG	CC	GG	CG	CG	CG	GG	CG	CG	CG	CC	CG	CC	CC	CC	GG	CC	GG	CG	CG	CC	CG	CC	CG	CC	CG	CG	CG	CG	GG	CG	CG	CG	CC	CG	CC	CG	CC	GG	CC	CC	CG	CC	CG
Gm04_15807230	Gm04	15807230	86.63	C	0.277778	CT	CC	TT	CT	CT	CT	TT	CT	CT	CT	CC	CT	CC	CC	CC	TT	CC	TT	CT	CT	CC	CT	CC	CT	CT	CT	CT	CT	CT	TT	CT	CT	CT	CC	CT	CC	CT	CC	TT	CC	CC	CT	CC	CT
Gm04_15807277	Gm04	15807277	87.07	T	0.282051	TC	TT	CC	TC	TC	TC	CC	TC	TC	TC	TT	TC	TT	TT	TT	CC	TT	CC	TC	TC	TT	TC	TT	TC	TC	TC	TC	TC	TC	CC	TC	TC	TC	TT	TC	TT	TC	TT	CC	TT	TT	TC	TT	TC
Gm04_15744525	Gm04	15744525	89.96	G	0.320513	GA	GG	AA	GA		GG	AA	GA	GG	GA	GG	GA	GG	GG	GG	AA	GG	AA	GA	GG	GG	GA	GG	GA	GA	GA	GA	GA	GA	AA	GA	GA	GA	GG	GA	GG	GA	GG	AA	GG	GG	GA	GG	GA
Gm04_13451797	Gm04	13451797	92.63	G	0.277778	GA	GG	AA	GA	GA	GA	AA	GA	GA	GA	GG	GA	GG	GG	GG	AA	GG	AA	GA	GA	GG	GA	GG	GA	GA	GA	GA	GA	GA	AA	GA	GA	GA	GG	GA	GG	GA	GG	AA	GG	GG	GA	GG	GA
Gm04_13090089	Gm04	13090089	93.28	A	0.286325	AA	AA	AG	AG	AG	AG	GG	AG	AG	AG	AA	AG	AA	AA	AA	GG	AA	GG	AG	AG	AA	AG	AA	AG	AG	AG	AG	AG	AG	GG	AG	AG	AG	AA	AG	AA	AG	AA	GG	AA	AA	AG	AA	AG
Gm04_12815622	Gm04	12815622	93.5	C	0.286325	CC	CC	CT	CT	CT	CT	TT	CT	CT	CT	CC	CT	CC	CC	CC	TT	CC	TT	CT	CT	CC	CT	CC	CT	CT	CT	CT	CT	CT	TT	CT	CT	CT	CC	CT	CC	CT	CC	TT	CC	CC	CT	CC	CT
Gm04_12619247	Gm04	12619247	94.15	T	0.277778	TT	TT	TG	TG	TG	TG	GG	TG	TG	TG	TT	TG	TT	TG	TT	GG	TT	GG	TG	TG	TT	TG	TT	TG	TG	TG	TG	TG	TG	GG	TG	TG	TG	TT	TG	TT	TG	TT	GG	TT	TT	TG	TT	TG
Gm04_12513019	Gm04	12513019	94.36	A	0.277778	AA	AA	AG	AG	AG	AG	GG	AG	AG	AG	AA	AG	AA	AG	AA	GG	AA	GG	AG	AG	AA	AG	AA	AG	AG	AG	AG	AG	AG	GG	AG	AG	AG	AA	AG	AA	AG	AA	GG	AA	AA	AG	AA	AG
Gm04_12148250	Gm04	12148250	94.58	G	0.273504	GG	GG	GT	GT	GT	GT	TT	GT	GT	GT	GG	GT	GG	GT	GG	TT	GG	TT	GT	GT	GG	GT	GG	GT	GT	GT	GT	GT	GT	TT	GT	GT	GT	GT	GT	GG	GT	GG	TT	GG	GG	GT	GG	GT
Gm04_11236457	Gm04	11236457	95.89	T	0.299145	TT	TT	TA	TA	TA	TA	AA	TA	TA	TA	TT	TA	TT	TA	TT	AA	TT	AA	TA	TA	TT	TA	TT	TA	TA	TA	TA	TA	TA	AA	TA	TA	TA	TA	TA	TT	TA	TT	AA	TT	TT	TA	TT	TA
Gm04_11236436	Gm04	11236436	96.54	A	0.311966	AA	AA	AG	AG	AA	AG	GG	AG	AG	AG	AA	AG	AA	AG	AA	GG	AA	GG	AG	AG	AA	AG	AA	AG	AG	AG	AG	AG	AG	GG	AG	AG	AG	AG	AG	AA	AG	AA	GG	AA	AA	AG	AA	AG
Gm04_11236474	Gm04	11236474	97.85	G	0.286325	GG	GG	GA	GA	GA	GA	AA	GA	GA	GA	GG	GA	GG	GA	GG	AA	GG	AA	GA	GA	GG	GA	GG	GA	GA	GA	GA	GA	GA	AA	GA	GA	GA	GA	GA	GG	GA	GG	AA	GG	GG	GA	GG	GA
Gm04_10516173	Gm04	10516173	98.5	A	0.277778	AA	AA	AC	AC	AC	AC	CC	AC	AC	AC	AA	AC	AA	AC	AA	CC	AA	CC	AC	AC	AA	AC	AA	AC	AC	AC	AC	AC	AC	CC	AC	AC	AC	AC	AC	AA	AC	AA	CC	AA	AA	AC	AA	AC
Gm04_10076679	Gm04	10076679	98.71	T	0.273504	TT	TT	TG	TG	TG	TG	GG	TG	TG	TG	TT	TG	TT	TG	TT	GG	TT	GG	TG	TG	TT	TG	TT	TG	TG	TG	TG	TG	TG	GG	TG	TG	TG	TG	TG	TT	TG	TT	GG	TT	TT	TG	TT	TG
Gm04_9691672	Gm04	9691672	99.15	G	0.273504	GG	GG	GA	GA	GA	GA	AA	GA	GA	GA	GG	GA	GG	GA	GG	AA	GG	AA	GA	GA	GG	GA	GG	GA	GA	GA	GA	GA	GA	AA	GA	GA	GA	GA	GA	GG	GA	GG	AA	GG	GG	GA	GG	GA
Gm04_9617145	Gm04	9617145	100.02	G	0.277778	GG	GG	GA	GA	GA	GA	AA	GA	GA	GA	GG	GA	GG	GA	GG	AA	GG	AA	GA	GA	GG	GA	GG	GA	GA	GA	GA	GA	GA	AA	GA	GA	GA	GA	GA	GG	GA	GG	AA	GG	GG	GA	GA	GA
Gm04_9549580	Gm04	9549580	100.23	A	0.273504	AA	AA	AG	AG	AG	AG	GG	AG	AG	AG	AA	AG	AA	AG	AA	GG	AA	GG	AG	AG	AA	AG	AA	AG	AG	AG	AG	AG	AG	GG	AG	AG	AG	AG	AG	AA	AG	AA	GG	AA	AA	AG	AG	AG
Gm04_9376933	Gm04	9376933	101.1	C	0.273504	CC	CC	CA	CA	CA	CA	AA	CA	CA	CA	CC	CA	CC	CA	CC	AA	CC	AA	CA	CA	CC	CA	CC	CA	CA	CA	CA	CA	CA	AA	CA	CA	CA	CA	CA	CC	CA	CC	AA	CC	CC	CA	CA	CA
Gm04_8394899	Gm04	8394899	105.31	T	0.264957	AA	AA	TA	TA	TA	TA	TA	TA	TA	TA	AA	TT	AA	TA	AA	TT	AA	TT	TA	TA	AA	TA	AA	TA	TA	TA	TA	TA	TA	TT	TA	TA	TA	TA	TA	AA	TT	TA	TT	AA	AA	TA	TA	TA
Gm04_8247045	Gm04	8247045	106.84	T	0.273504	CC	CC	TC	TC	TC	TC	TC	TC	TC	TC	CC	TT	CC	TC	CC	TT	CC	TT	TC	TC	CC	TC	CC	TC	TC	TC	TC	TC	TC	TT	TC	TC	TC	TC	TC	CC	TT	TC	TT	CC	CC	TC	TC	TC
Gm04_8002217	Gm04	8002217	110.37	T	0.264957	CC	CC	TC	TC	TC	TC	TC	TC	TT	TC	CC	TT	CC	TC	TC	TT	CC	TT	TC	TC	CC	TC	CC	TC	TC	TC	TC	TC	TC	TC	TC	TC	TC	TC	TC	CC	TT	TC	TT	CC	CC	TC	TC	TT
Gm04_7744741	Gm04	7744741	112.12	A	0.25641	AA	AG	AG	AG	AG	AG	AG	AG	AG	AG	AA	GG	AA	AG	AG	GG	AA	GG	AG	AG	AA	AG	AA	AG	AG	AG	AG	AG	AG	AG	AG	GG	AG	AG	AG	AA	GG	AG	GG	AA	AG	AG	AG	GG
Gm04_7506811	Gm04	7506811	116.33	A	0.269231	TT	AT	AT	AT	TT	AT	AT	AT	AT	TT	TT	AA	TT	AT	AT	AA	TT	AA	AT	AT	TT	AT	TT	AT	AT	AT	AT	AT	AT	AT	AT	AA	AT	AT	AT	TT	AA	AT	AA	TT	AT	AT	AT	AT
Gm04_7213523	Gm04	7213523	118.52	T	0.260684	TT	TA	TA	TA	TT	TA	TA	TA	TA	TT	TT	AA	TT	TA	TA	AA	TT	AA	TA	TA	TT	TA	TT	TA	TA	TA	TA	TA	TA	TA	TA	AA	TA	TA	TA	TT	AA	TA	AA	TT	TA	TA	TA	TA
Gm04_7065863	Gm04	7065863	120.26	T	0.264957	CC	TC	TC	TC	TC	TC	TC	TC	TC	CC	CC	TT	CC	TC	CC	TT	CC	TT	TC	TC	CC	TC	CC	TC	TC	TC	TC	TC	TC	TC	TC	TT	TC	TC	TC	CC	TT	TC	TT	CC	TC	TC	TC	TC
Gm04_7019172	Gm04	7019172	120.92	T	0.25641	CC	TC	TC	TC	TC	TC	TC	TC	TC	CC	CC	TT	CC	TC	CC	TT	CC	TT	TC	TC	CC	TC	CC	TC	TC	TC	TC	TC	TC	TC	TC	TT	TC	TC	TC	CC	TT	TC	TT	CC	TC	TC	TC	TC
Gm04_6660696	Gm04	6660696	124.9	C	0.269231	TT	CT	CT	CC	CT	CT	CT	CT	CT	TT	TT	CC	CT	CT	TT	CC	TT	CC	CT	CT	TT	CT	TT	CT	CT	CT	CT	CT	CT	CT	CT	CC	CT	CT	CT	TT	CC	CT	CC	TT	CT	CT	CT	CT
Gm04_6466962	Gm04	6466962	128.2	A	0.269231	GG	AG	AG	AA	AG	AG	AG	AG	AG	GG	GG	AA	AG	AG	GG	AA	GG	AA	AG	AG	GG	AG	GG	AG	AG	AG	AG	AG	AG	AG	AG	AA	AG	AG	AG	GG	AA	AG	AG	GG	AG	AG	AG	AG
Gm04_2763363	Gm04	2763363	159.96	C	0.299145	GG	CG	CG	GG	CG	CC	CG	GG	CC	GG	GG	CC	CG	CC	GG	CG	GG	CG	GG	GG	GG	CG	GG	GG	CC	CG	CG	CG	CC	CC	CG	CC	CG	CC	GG	GG	CG	CC	CG	GG	CC	CG	CG	CG
Gm04_2568411	Gm04	2568411	161.27	C	0.299145	TT	CT	CT	TT	CT	CC	CT	TT	CC	TT	TT	CC	CT	CC	CT	CT	CT	CT	TT	TT	TT	CT	TT	TT	CC	CT	CT	CT	CC	CC	CT	CC	CT	CC	TT	TT	CT	CC	CT	TT	CC	CT	CT	CT
Gm04_2459490	Gm04	2459490	163.23	T	0.299145	TT	TG	TG	TT	TG	GG	TG	TT	GG	TT	TT	GG	TG	GG	TG	TG	TG	TG	TT	TT	TT	TG	TT	TT	GG	TG	TG	TG	GG	GG	TG	GG	TG	GG	TT	TT	TG	GG	TT	TT	GG	TG	TG	TG
Gm04_2459483	Gm04	2459483	163.45	C	0.299145	CC	CT	CT	CC	CT	TT	CT	CC	TT	CC	CC	TT	CT	TT	CT	CT	CT	CT	CC	CC	CC	CT	CC	CC	TT	CT	CT	CT	TT	TT	CT	TT	CT	TT	CC	CC	CT	TT	CC	CC	TT	CT	CT	CT
Gm04_1929171	Gm04	1929171	166.53	G	0.286325	GG	GA	GA	GG	GA	AA	GA	GG	AA	GG	GG	AA	GA	AA	GA	GA	GA	GA	GG	GG	GG	GA	GG	GG	AA	GA	GA	GA	AA	AA	GA	AA	GA	AA	GG	GA	GA	AA	GA	GG	AA	GA	GA	GA
Gm04_2402645	Gm04	2402645	170.5	G	0.299145	GG	GA	GA	GG	GA	AA	GA	GG	AA	GG	GG	AA	GA	AA	GA	GA	GA	GG	GG	GG	GG	GA	GG	GG	AA	GA	GA	GA	AA	AA	GA	AA	GA	AA	GG	GG	GA	AA	GG	GG	AA	GA	GA	GA
Gm04_2402689	Gm04	2402689	171.81	C	0.299145	CC	CT	CT	CC	CT	TT	CT	CC	TT	CC	CC	TT	CT	TT	CT	CT	CT	CC	CC	CC	CC	CT	CC	CC	TT	CT	CT	CT	TT	TT	CT	TT	CC	TT	CC	CC	CT	TT	CC	CC	TT	CT	CT	CT
Gm04_11656675	Gm04	11656675	240.61	C	0.25641	CC	AA	AA	CA	CC	CA	CA	CA	CA	CA	CC	AA	CC	CA	CA	CC	CA	CA	AA	CA	CA	CA	CA	CA	CA	CA	CC	CC	CA	CA	CC	CA	AA	CA	CC	CC	CA	AA	CC	CA	AA	CC	CA	AA
Gm04_11656669	Gm04	11656669	241.04	C	0.25641	CC	GG	GG	CG	CC	CG	CG	CG	CG	CG	CC	GG	CC	CG	CG	CC	CG	CG	GG	CG	CG	CG	CG	CG	CG	CG	CC	CC	CG	CG	CC	CG	GG	CG	CC	CC	CG	GG	CC	CG	GG	CC	CG	GG
Gm05_40716225	Gm05	40716225	0	G	0.316239	AA	GG	GG	GA	AA	GG	GA	GG	GA	GG	GA	AA	AA	GA	GG	AA	GA	AA	AA	AA	GA	AA	GA	GA	GA	GA	GA	GG	GA	GG	GG	AA	GA	AA	AA	GA	GA	GG	GA	GA	GA	GG	GA	GA
Gm05_40716192	Gm05	40716192	0.87	A	0.316239	TT	AA	AA	AT	TT	AA	AT	AA	AT	AA	AT	TT	TT	AT	AA	TT	AT	TT	TT	TT	AT	TT	AT	AT	AT	AT	AT	AA	AT	AA	AA	TT	AT	TT	TT	AT	AT	AA	AT	AT	AT	AA	AT	AT
Gm05_40716165	Gm05	40716165	1.09	A	0.311966	TT	AA	AA	AT	TT	AA	AT	AA	AT	AA	AT	TT	TT	AT	AA	TT	AT	TT	TT	TT	AT	TT	AT	AT	AT	AT	AT	AA	AT	AA	AA	TT	AT	TT	TT	AT	AT	AA	AT	AT	AT	AA	AT	AT
Gm05_40810534	Gm05	40810534	1.96	A	0.299145	TT	AA	AA	AT	TT	AA	AT	AA	AT	AA	AT	TT	TT	AT	AA	TT	AT	TT	TT	TT	AT	TT	AT	AT	AT	AT	AT	AA	AT	AA	AA	TT	AT	TT	TT	AT	AT	AA	AT	AT	AT	AA	AT	AT
Gm05_40810535	Gm05	40810535	2.17	G	0.299145	GG	TT	TT	GT	GG	TT	GT	TT	GT	TT	GT	GG	GG	GT	TT	GG	GT	GG	GG	GG	GT	GG	GT	GT	GT	GT	GT	TT	GT	TT	TT	GG	GT	GG	GG	GT	GT	TT	GT	GT	GT	TT	GT	GT
Gm05_40689630	Gm05	40689630	2.82	G	0.303419	GG	AA	AA	GA	GG	AA	GA	AA	GA	AA	GA	GG	GG	GA	AA	GG	GA	GG	GG	GG	GA	GG	GA	GA	GA	GA	GA	AA	GA	AA	AA	GG	GA	GG	GG	GA	GA	AA	GA	GA	GA	AA	GA	GA
Gm05_40474603	Gm05	40474603	4.13	G	0.303419	CC	GG	GG	GC	CC	GG	GC	GG	GC	GG	GG	CC	CC	GC	GG	CC	GC	CC	CC	CC	GC	CC	GC	GC	GC	GC	GC	GG	GC	GG	GG	CC	GC	CC	GC	GC	GC	GG	GC	GC	GC	GG	GC	GC
Gm05_40217011	Gm05	40217011	5.66	G	0.316239	GG	CC	CC	GC	GG	CC	GC	CC	GC	CC	CC	GG	GG	GC	CC	GG	GC	GG	GG	GG	GC	GG	GC	GC	GC	GC	GC	CC	GC	CC	CC	GG	GC	GG	GC	GC	GC	CC	GC	GC	GC	CC	GC	GC
Gm05_39632345	Gm05	39632345	8.51	G	0.303419	CC	GG	GG	GC	CC	GC	GC	GG	GC	GG	GG	CC	CC	GC	GG	CC	GC	CC	CC	CC	GC	GC	GC	GC	GC	CC	GC	GG	GC	GG	GG	CC	GC	CC	GC	GC	GC	GG	GC	GC	GC	GG	GC	GC
Gm05_39368625	Gm05	39368625	10.48	C	0.311966	CC	AA	AA	CA	CC	CA	CA	AA	CA	AA	AA	CC	CC	CA	AA	CC	CA	CC	CC	CC	CA	CA	CA	CA	CA	CC	CA	AA	CA	AA	AA	CC	AA	CC	CA	CA	CA	AA	CC	CA	CA	AA	CA	AA
Gm05_39272103	Gm05	39272103	10.91	G	0.311966	GG	TT	TT	GT	GG	GT	GT	TT	GT	TT	TT	GG	GG	GT	TT	GG	GT	GG	GG	GG	GT	GT	GT	GT	GT	GG	GT	TT	GT	TT	TT	GG	TT	GG	GT	GT	GT	TT	GG	GT	GT	TT	GT	TT
Gm05_39124033	Gm05	39124033	12.44	T	0.303419	AA	TT	TT	TA	AA	TA	TA	TT	TA	TT	TT	AA	AA	TA	TT	AA	TA	AA	AA	AA	TA	TA	TA	TA	TA	AA	TA	TT	TA	TT	TT	TA	TT	AA	TA	TA	TA	TT	AA	TA	TA	TT	TA	TT
Gm05_38971556	Gm05	38971556	12.87	C	0.299145	CC	GG	GG	CG	CC	CG	CG	GG	CG	GG	GG	CC	CC	CG	GG	CC	CG	CC	CC	CC	CG	CG	CG	CG	CG	CC	CG	GG	CG	GG	GG	CG	GG	CC	CG	CG	CG	GG	CC	CG	CG	GG	CG	GG
Gm05_38891151	Gm05	38891151	14.18	G	0.307692	GG	AA	AA	GA	GG	GA	GA	AA	GA	AA	AA	GG	GG	GA	AA	GG	GA	GG	GG	GG	GA	GA	GA	GA	GA	GG	GA	AA	GA	AA	AA	GA	AA	GG	GA	GA	GA	AA	GG	GA	GA	AA	GA	GA
Gm05_38680474	Gm05	38680474	16.15	T	0.316239	AA	TT	TT	TA	AA	TA	TA	TT	TA	TT	TT	AA	AA	TA	TT	TA	TA	AA	AA	AA	TT	TA	TA	TA	TA	AA	TA	TT	TA	TT	TT	TA	TT	AA	TA	TA	TA	TT	AA	TA	TA	TT	TA	TA
Gm05_37491072	Gm05	37491072	26.55	C	0.264957	CC	TT	CT	CT	CC	CT	CT	CT	CT	TT	TT	CT	CC	CT	CT	CT	CT	CC	CT	CC	CT	CT	CT	CT	TT	CC	CT	TT	CC	CT	TT	CT	TT	CC	TT	CT	CT	TT	CT	CC	CT	TT	CC	CT
Gm05_36275578	Gm05	36275578	31.68	T	0.273504	CC	TT	TC	TC	TC	TC	TC	TC	TC	TT	TT	TC	CC	TT	TC	TC	TC	TC	TC	CC	TC	TC	TT	TC	TT	CC	TC	TT	CC	TC	TT	TC	TT	TC	TT	CC	TC	TT	TT	CC	TC	TC	CC	TC
Gm05_36046372	Gm05	36046372	33.21	A	0.252137	TT	AA	AT	AT	AT	AT	AT	AT	AT	AA	AA	AT	TT	AA	AT	AT	AT	AT	AT	TT	AT	AT	AA	AT	AA	TT	AT	AA	TT	AT	AA	AT	AA	AT	AA	TT	AT	AA	AA	TT	AT	AT	TT	AT
Gm05_35831582	Gm05	35831582	35.4	G	0.264957	AA	GG	GA	GA	GA	GA	GA	GA	GA	GG	GG	GA	AA	GG	GA	GA	GA	GA	GA	AA	GA	GA	GG	GA	GG	AA	GA	GG	AA	GA	GG	GA	GG	GA	GG	AA	GA	GG	GG	AA	GA	GA	AA	GA
Gm05_35718818	Gm05	35718818	35.84	C	0.260684	GG	CC	CG	CG	CG	CG	CG	CG	CG	CC	CC	CG	GG	CC	CG	CG	CG	CG	CG	GG	CG	CG	CC	CG	CC	GG	CG	CC	GG	CG	CC	CG	CC	CG	CC	GG	CG	CC	CC	GG	CG	CG	GG	CG
Gm05_35644806	Gm05	35644806	36.05	G	0.264957	AA	GG	GA	GA	GG	GA	GA	GA	GA	GG	GG	GA	AA	GG	GA	GA	GA	GA	GA	AA	GA	GA	GG	GA	GG	AA	GA	GG	AA	GA	GG	GA	GG	GA	GG	AA	GA	GG	GG	AA	GA	GA	AA	GA
Gm05_34841190	Gm05	34841190	42.81	A	0.273504	GG	AA	AG	AG	AA	AG	AG	AG	AG	AA	AA	AG	GG	AA	AG	AG	AG	AA	AG	AG	AG	AG	AA	AG	AA	GG	AG	AA	GG	AG	AA	AG	AG	AG	AA	GG	AA	AG	AA	GG	GG	AG	GG	AG
Gm05_34671838	Gm05	34671838	43.46	G	0.264957	GG	AA	GA	GA	AA	GA	GA	GA	GA	AA	AA	GA	GG	AA	GA	GA	GA	AA	GA	GA	GA	GA	AA	GA	AA	GG	GA	AA	GG	GA	AA	GA	GA	GA	AA	GG	AA	GA	AA	GG	GG	GA	GG	GA
Gm05_34546246	Gm05	34546246	44.99	C	0.273504	CC	TT	CT	CT	TT	CT	CT	CT	CT	TT	TT	CT	CC	TT	CT	CT	CT	TT	CT	CT	CT	CT	TT	CT	TT	CC	CT	TT	CC	CT	TT	CT	CT	CT	TT	CC	TT	CT	TT	CC	CC	CT	CC	CT
Gm05_34546327	Gm05	34546327	45.21	T	0.273504	TT	CC	TC	TC	CC	TC	TC	TC	TC	CC	CC	TC	TT	CC	TC	TC	TC	CC	TC	TC	TC	TC	CC	TC	CC	TT	TC	CC	TT	TC	CC	TC	TC	TC	CC	TT	CC	TC	CC	TT	TT	TC	TT	TC
Gm05_34461100	Gm05	34461100	45.64	T	0.277778	TT	GG	TG	TG	GG	TG	TG	TG	TG	GG	GG	TG	TT	GG	TG	TG	TG	GG	TG	TG	TG	TG	GG	TG	GG	TT	TG	GG	TT	TG	GG	TG	TG	TG	GG	TT	GG	TG	GG	TT	TT	TG	TT	TG
Gm05_34369769	Gm05	34369769	46.29	G	0.273504	GG	AA	GA	GA	AA	GA	GA	GA	GA	AA	AA	GA	GG	AA	GA	GA	GA	AA	GA	GA	GA	GA	AA	GA	AA	GG	GA	AA	GG	GA	AA	GA	GA	GA	AA	GG	AA	GA	AA	GG	GG	GA	GG	GA
Gm05_34369785	Gm05	34369785	46.51	A	0.273504	AA	GG	AG	AG	GG	AG	AG	AG	AG	GG	GG	AG	AA	GG	AG	AG	AG	GG	AG	AG	AG	AG	GG	AG	GG	AA	AG	GG	AA	AG	GG	AG	AG	AG	GG	AA	GG	AG	GG	AA	AA	AG	AA	AG
Gm05_7182572	Gm05	7182572	87.77	A	0.311966	AA	AA	AA	AT	AT	AA	AA	TT	AT	TT	TT	AT	AA		AA	AT	AT	AT	TT	TT	AA	AA	AA	TT	AA	AT	AT	AT	AA	AA	AT	AT	AA	AA	AT	AA	AT	AT	TT	AA	AT	AT	AA	AA
Gm05_26232821	Gm05	26232821	92.17	T	0.247863	CC	CC	TC	TC	TC	CC	TC	TT	TC	TT	TT	TC	CC	TT	CC	TC	TC	TC	TT	TT	CC	CC	TC	TT	CC	TC	TC	TC	CC	TC	TC	TC	CC	TC	TC	CC	TC	TC	TT	CC	TC	TC	CC	CC
Gm05_15068355	Gm05	15068355	92.39	A	0.247863	GG	GG	AG	AG	AG	GG	AG	AA	AG	AA	AA	AG	GG	AA	GG	AG	AG	AG	AA	AA	GG	GG	AG	AA	GG	AG	AG	AG	GG	AG	AG	AG	GG	AG	AG	GG	AG	AG	AA	GG	AG	AG	GG	GG
Gm05_4457721	Gm05	4457721	118.65	C	0.333333	CT	CT	CT	CT	CT	TT	CT	CC	CC	CC	CC	CT	TT	CT	TT	TT	CT	TT	CC	CT	TT	TT	CT	CC	CT	CT	CT	TT	TT	CC	CT	CT	TT	CT	CT	CT	CT	CT	CT	TT	CT	CT	TT	CC
Gm05_3735980	Gm05	3735980	131.4	G	0.252137	GA	GA	AA	GA	GA	AA	GA	GG	GG	AA	GG	GA	AA	GA	GA	GA	GA	GA	GG	GA	GA	GA	GA	GG	GA	GG	GA	AA	AA	GA	GA	GA	AA	GA	GA	GA	GA	GG	GA	AA	GA	GA	AA	AA
Gm05_1727339	Gm05	1727339	155.64	G	0.273504	GC	GC	GC	GC	GG	GG	GC	GG	CC	GG	CC	CC	GG	GG	GC	GC	GC	GC	GC	GC	CC	CC	GC	GG	GC	CC	GC	GG	GG	GC	GC	GG	GC	GC	GC	CC	GC	CC	GG	GG	GC	CC	GC	GG
Gm05_1727368	Gm05	1727368	156.51	T	0.282051	TG	TG	TG	TG	TT	TT	TG	TT	GG	TT	GG	GG	TT	TT	TG	TG	TG	TG	TG	TG	GG	GG	TG	TT	TG	GG	TG	TT	TT	TG	TG	TT	TG	TG	TG	GG	TG	GG	TT	TT	TG	GG	TG	TT
Gm05_1535980	Gm05	1535980	158.48	C	0.260684	CT	CT	CT	CT	CC	CC	CT	CC	TT	CC	CT	TT	CC	CC	CT	CT	CT	CT	CT	CT	TT	TT	CT	CC	CT	TT	CT	CC	CC	CT	CT	CC	CT	CT	CT	TT	CT	TT	CC	CC	CT	TT	CT	CC
Gm05_1422645	Gm05	1422645	159.79	A	0.252137	AT	AT	AT	AT	AA	AA	AT	AA	TT	AA	AT	TT	AA	AA	AT	AT	AT	AT	AT	AT	TT	TT	AT	AA	AT	TT	AT	AA	AA	AT	AT	AA	AT	AT	AT	TT	AT	TT	AA	AA	AT	TT	AT	AA
Gm05_1326732	Gm05	1326732	160.44	C	0.25641	CA	CA	CA	CA	CC	CC	CA	CC	AA	CC	CA	AA	CC	CC	CA	CA	CA	CA	CA	CA	AA	AA	CA	CC	CA	AA	CA	CC	CC	CA	CA	CC	CA	CA	CA	AA	CA	AA	CC	CC	CA	AA	CA	CC
Gm05_1307971	Gm05	1307971	160.87	G	0.264957	GA	GA	GA	GA	GG	GG	GA	GG	AA	GG	GA	AA	GG	GG	GA	GA	GA	GA	GA	GA	AA	AA	GA	GG	GA	AA	GA	GG	GG	GA	GA	GG	GA	GA	GA	AA	GA	AA	GG	GG	GA	AA	GA	GG
Gm05_1307912	Gm05	1307912	161.31	A	0.260684	AT	AT	AT	AT	AA	AA	AT	AA	TT	AA	AT	TT	AA	AA	AT	AT	AT	AT	AT	AT	TT	TT	AT	AA	AT	TT	AT	AA	AA	AT	AT	AA	AT	AT	AT	TT	AT	TT	AA	AA	AT	TT	AT	AA
Gm05_1115673	Gm05	1115673	162.18	A	0.25641	AG	AG	AG	AG	AA	AA	AG	AA	GG	AA	AG	GG	AA	AA	AG	AG	AG	AG	AG	AG	GG	GG	AG	AA	AG	GG	AG	AA	AA	AG	AG	AA	AG	AG	AG	GG	AG	GG	AA	AA	AG	GG	AG	AA
Gm05_1050880	Gm05	1050880	162.61	A	0.25641	AG	AG	AG	AG	AA	AA	AG	AA	GG	AA	AG	GG	AA	AA	AG	AG	AG	AG	AG	AG	GG	GG	AG	AA	AG	GG	AG	AA	AA	AG	AG	AA	AG	AG	AG	GG	AG	GG	AA	AA	AG	GG	AG	AA
Gm05_899939	Gm05	899939	164.37	G	0.269231	GA	GA	GA	GA	AA	AA	GG	AA	GG	AA	GA	GG	AA	AA	GA	GA	GA	GA	GA	GA	GG	GG	GA	AA	GA	GG	GA	AA	AA	GA	GA	AA	GA	GA	GA	GG	GA	GG	AA	AA	GA	GG	GA	AA
Gm05_476938	Gm05	476938	168.36	A	0.277778	AC	AC	AC	AC	CC	CC	AC	CC	AA	CC	AC	AA	CC	CC	AC	AC	AC	AC	AC	AC	AA	AA	AC	CC	AC	AA	AC	CC	AC	AA	AC	CC	AC	AC	AC	AA	AC	AA	CC	CC	AC	AA	AC	CC
Gm05_307215	Gm05	307215	168.8	T	0.282051	TG	TG	TG	TG	GG	GG	TG	GG	TT	GG	TG	TT	GG	GG	TG	TG	TG	TG	TG	TG	TT	TT	TG	GG	TG	TT	TG	GG	TG	TT	TG	GG	TG	TG	TG	TT	TG	TT	GG	GG	TG	TT	TG	GG
Gm06_53031	Gm06	53031	0	C	0.277778	CC	CT	TT	CT	CC	CT	CT	CC	CC	CT	CC	CT	CT	CT	CC	CT	CC	TT	CT	CC	CC	CT	TT	CC	CT	CT	CT	CT	CT	CC	TT	TT	CC	CT	CC	TT	CT	TT	TT	CT	TT	CT	CT	CC
Gm06_292749	Gm06	292749	1.09	T	0.273504	TT	TC	CC	TC	TT	TC	TC	TT	TT	TC	TT	TT	TC	TC	TT	TC	TT	CC	TC	TT	TT	TC	CC	TT	TC	TC	TC	TC	TC	TT	CC	CC	TT	TC	TT	CC	TC	CC	CC	TC	CC	TC	TC	TT
Gm06_414408	Gm06	414408	1.52	A	0.269231	AA	AG	GG	AG	AA	AG	AG	AA	AA	AG	AA	AA	AG	AG	AA	AG	AA	GG	AG	AA	AA	AG	GG	AA	AG	AG	AG	AG	AG	AA	GG	GG	AA	AG	AA	GG	AG	GG	AG	AG	GG	AG	AG	AA
Gm06_1110978	Gm06	1110978	5.96	T	0.260684	CC	TC	TC	TC	TC	TC	TC	TT	TC	TC	CC	CC	TC	TC	CC	TC	CC	TT	TC	CC	CC	TC	TT	CC	TC	TC	TC	TC	TC	CC	TT	TT	CC	TC	CC	TT	TC	TT	TC	TC	TT	TC	TC	CC
Gm06_968186	Gm06	968186	6.18	T	0.264957	GG	TG	TG	TG	TG	TG	TG	TT	TG	TG	GG	GG	TG	TG	GG	TG	GG	TT	TG	GG	GG	TT	TT	GG	TG	TG	TG	TG	TG	GG	TT	TT	GG	TG	GG	TT	TG	TT	TG	TG	TT	TG	TG	GG
Gm06_968192	Gm06	968192	6.61	G	0.273504	AA	GA	GA	GA	GA	GA	GA	GG	GA	GA	AA	AA	GA	GA	AA	GA	AA	GG	GA	AA	AA	GG	GG	AA	GA	GA	GA	GA	GA	AA	GG	GG	AA	GA	AA	GG	GA	GG	GA	GA	GG	GA	GA	AA
Gm06_968175	Gm06	968175	7.26	G	0.269231	AA	GA	GA	GA	GA	GA	GA	GG	GA	GA	AA	AA	GA	GA	AA	GA	AA	GG	GA	AA	AA	GA	GG	AA	GA	GA	GA	GA	GA	AA	GG	GG	AA	GA	AA	GG	GA	GG	GA	GA	GG	GA	GA	AA
Gm06_968127	Gm06	968127	7.91	A	0.264957	TT	AT	AT	AT	AT	AT	AT	AA	AT	AT	TT	TT	AT	AT	TT	AT	TT	AA	AT	TT	TT	AT	AA	TT	AT	AT	AT	AT	AT	TT	AA	AA	TT	AT	TT	AA	AT	AA	AT	AT	AA	AT	AT	TT
Gm06_1151578	Gm06	1151578	8.35	A	0.260684	GG	AG	AG	AG	AG	AG	AG	AA	AG	AG	GG	GG	AG	AG	GG	AG	GG	AA	AG	GG	GG	AG	AA	GG	AG	AG	AG	AG	AG	GG	AA	AA	GG	AG	GG	AA	AG	AA	AG	AG	AA	AG	AG	GG
Gm06_1292066	Gm06	1292066	9.22	C	0.269231	GG	CG	CG	CG	CG	CG	CG	CC	CG	CG	GG	GG	CG	CG	GG	CG	GG	CC	CG	GG	GG	CG	CC	GG	CG	CG	CG	CG	CG	GG	CC	CC	GG	CG	GG	CC	CG	CC	CG	CG	CC	CG	CG	GG
Gm06_1627366	Gm06	1627366	10.52	C	0.269231	TT	CT	CT	CT	CT	CT	CC	CC	CT	CT	TT	TT	CT	CT	TT	CT	TT	CC	CT	TT	TT	CT	CC	TT	CT	CT	CT	CT	CT	TT	CC	CC	TT	CT	TT	CC	CT	CC	CT	CT	CC	CT	CT	TT
Gm06_2013648	Gm06	2013648	15.88	G	0.260684	AA	GA	GA	GA	GA	GA	GG	GG	GA	GA	AA	AA	GA	GA	AA	GA	AA	GG	GA	AA	AA	GA	GG	AA	GA	GA	AA	AA	GA	AA	GG	GG	AA	GA	AA	GG	GA	GA	GA	GA	GG	GA	GA	AA
Gm06_2663890	Gm06	2663890	21.95	A	0.25641	CC	AC	AC	AC	AC	AC	AA	AA	AC	AC	CC	CC	AC	AC	CC	AC	AC	AA	AC	CC	CC	AC	AA	CC	AC	AC	CC	CC	AA	CC	AA	AA	CC	AC	CC	AA	AC	AC	AC	AC	AA	AC	AC	CC
Gm06_2749871	Gm06	2749871	23.25	G	0.282051	CC	GC	GC	GC	GG	GC	GG	GG	GC	GC	CC	CC	GC	GC	CC	GC	GC	GG	GC	CC	CC	GC	GG	CC	GC	GC	CC	CC	GG	CC	GG	GG	CC	GC	CC	GG	GC	GC	GC	GC	GG	GC	GC	CC
Gm06_2663870	Gm06	2663870	24.78	G	0.260684	AA	GA	GA	GA	GA	GA	GG	GG	GA	GA	AA	AA	GA	GA	AA	GA	GA	GG	GA	AA	AA	GA	GG	AA	GA	GA	AA	AA	GG	AA	GG	GG	AA	GA	AA	GG	GA	GA	GA	GA	GG	GA	GA	AA
Gm06_2897733	Gm06	2897733	25.87	T	0.247863	CC	TC	TC	TC	TC	TC	TT	TT	TC	TC	CC	CC	TC	TC	CC	TC	TC	TT	TC	CC	CC	TC	TT	CC	TC	TC	CC	CC	TT	CC	TC	TT	CC	TC	CC	TT	TC	TC	TC	TC	TT	TC	TC	CC
Gm06_3170507	Gm06	3170507	26.3	C	0.247863	TT	CT	CT	CT	CT	CT	CC	CC	CT	CT	TT	TT	CT	CT	TT	CT	CT	CC	CT	TT	TT	CT	CC	TT	CT	CT	TT	TT	CC	TT	CT	CC	TT	CT	TT	CC	CT	CT	CT	CT	CC	CT	CT	CT
Gm06_3155638	Gm06	3155638	26.52	G	0.252137	AA	GA	GA	GA	GA	GA	GG	GG	GA	GA	AA	AA	GA	GA	AA	GA	GA	GG	GA	AA	AA	GA	GG	AA	GA	GA	AA	AA	GG	AA	GA	GG	AA	GA	AA	GG	GA	GA	GA	GA	GG	GA	GA	GA
Gm06_3983824	Gm06	3983824	31.2	G	0.25641	CC	GC	GC	GC	GC	GG	GG	GG	GC	GC	CC	GC	GC	GC	GC	GC	GC	GG	GC	CC	CC	GC	GG	CC	GG	CC	GC	CC	GG	CC	GC	GG	CC	GC	CC	GG	GC	GC	GC	GC	GG	GC	GC	GC
Gm06_3983772	Gm06	3983772	31.41	G	0.252137	CC	GC	GC	GC	GC	GG	GG	GG	GC	GC	CC	GC	GC	GC	GC	GC	GC	GG	GC	CC	CC	GC	GG	CC	GG	CC	GC	CC	GG	CC	GC	GG	CC	GC	CC	GG	GC	GC	GC	GC	GG	GC	GC	GC
Gm06_5140519	Gm06	5140519	38.91	C	0.247863	CT	CT	CT	CT	CT	CC	CC	CT	CT	CT	TT	CT	CT	CT	CT	CT	CT	CC	CT	TT	TT	CC	CC	TT	CC	TT	CT	TT	CC	TT	CT	CC	CT	CT	TT	CC	CT	CT	CT	CT	CC	CT	CT	CT
Gm06_6680583	Gm06	6680583	51.42	C	0.286325	CA	CA	AA	CA	AA	CC	CA	CA	CA	CA	AA	CA	CC	CA	CA	CA	CA	CC	CA	AA	AA	CC	CC	AA	CC	AA	CA	AA	CC	CA	CA	CC	CC	CC	AA	CC	CA	CA	CA	CA	CC	CA	CC	CA
Gm06_6815837	Gm06	6815837	52.07	C	0.277778	CT	CT	TT	CT	TT	CC	CT	CT	CT	CT	TT	CT	CC	CT	CT	CT	CT	CC	CT	TT	TT	CC	CC	TT	CC	TT	CT	TT	CC	CT	CT	CC	CC	CC	TT	CC	CT	CT	CT	CT	CC	CT	CC	CT
Gm06_6815883	Gm06	6815883	52.51	A	0.273504	AG	AG	GG	AG	GG	AA	AG	AG	AG	AG	GG	AG	AA	AG	AG	AG	AG	AA	AG	GG	GG	AA	AA	GG	AA	GG	AG	GG	AA	AG	AG	AA	AA	AA	GG	AA	AG	AG	AG	AG	AA	AG	AA	AG
Gm06_6792924	Gm06	6792924	52.72	T	0.277778	TG	TG	GG	TG	GG	TT	TG	TG	TG	TG	GG	TG	TT	TG	TG	TG	TG	TT	TG	GG	GG	TT	TT	GG	TT	GG	TG	GG	TT	TG	TG	TT	TT	TT	GG	TT	TG	TG	TG	TG	TT	TG	TT	TG
Gm06_6542791	Gm06	6542791	53.38	A	0.277778	AG	AG	GG	AG	GG	AA	AG	AG	AG	AG	GG	AG	AA	AG	AG	AG	AG	AA	AG	GG	GG	AA	AA	GG	AA	GG	AG	GG	AA	AG	AG	AA	AA	AA	GG	AA	AG	AG	AG	AG	AA	AG	AA	AG
Gm06_6469194	Gm06	6469194	54.9	G	0.269231	GC	GC	CC	GC	CC	GG	GC	CC	GC	GC	CC	GC	GG	GC	GC	GC	GC	GG	GC	CC	CC	GG	GG	CC	GG	CC	GC	CC	GG	CC	GC	GG	GG	GG	CC	GG	GC	GC	GC	GC	GG	GC	GG	GC
Gm06_7539273	Gm06	7539273	60.72	A	0.282051	AA	AG	AG	AG	GG	AA	AG	AG	AG	AG	GG	AG	AA	GG	AG	AG	AG	AG	AG	GG	GG	AA	AA	GG	AA	GG	AG	GG	AA	AG	AG	AA	AA	AA	GG	AA	AG	AG	AG	AG	AG	AG	AA	AG
Gm06_7891132	Gm06	7891132	61.81	C	0.282051	CC	CT	CT	CT	TT	CC	CT	CT	CT	CT	TT	CT	CC	TT	CT	CT	CT	CT	CT	TT	TT	CC	CC	TT	CC	TT	CT	TT	CC	CT	CT	CC	CC	CC	TT	CC	CT	CT	CT	CT	CT	CT	CC	CT
Gm06_7891172	Gm06	7891172	62.02	C	0.286325	CC	CT	CT	CT	TT	CC	CT	CT	CT	CT	TT	CT	CC	TT	CT	CT	CT	CT	CT	TT	TT	CC	CC	TT	CC	TT	CT	TT	CC	CT	CT	CC	CC	CC	TT	CC	CT	CT	CT	CT	CT	CT	CC	CT
Gm06_7717635	Gm06	7717635	62.89	T	0.277778	TT	TA	TA	TA	AA	TT	TA	AA	TA	TA	AA	TA	TT	AA	TA	TA	TA	TA	TA	AA	AA	TT	TT	AA	TT	AA	TA	AA	TT	AA	TA	TT	TT	TT	AA	TT	TA	TA	TA	TA	TA	TA	TT	TA
Gm06_7785884	Gm06	7785884	63.11	T	0.282051	TT	TC	TC	TC	CC	TT	TC	CC	TC	TC	CC	TC	TT	CC	TC	TC	TC	TC	TC	CC	CC	TT	TT	CC	TT	CC	TC	CC	TT	CC	TC	TT	TT	TT	CC	TT	TC	TC	TC	TC	TC	TC	TT	TC
Gm06_7924012	Gm06	7924012	63.76	T	0.282051	TT	TA	TA	TA	AA	TT	TA	AA	TA	TA	AA	TA	TT	AA	TA	TA	TA	AA	TA	AA	AA	TT	TT	AA	TT	AA	TA	AA	TT	AA	TA	TT	TT	TT	AA	TT	TA	TA	TA	TA	TA	TA	TT	TA
Gm06_8099847	Gm06	8099847	65.73	A	0.282051	AA	AG	AG	AG	GG	AA	AG	AG	AG	AG	GG	AG	AA	GG	AG	AG	AG	GG	AG	GG	GG	AA	AA	GG	AA	GG	AG	GG	AA	AG	AG	AG	AA	AA	GG	AA	AG	AG	AG	AG	AG	AG	AA	AG
Gm06_11154804	Gm06	11154804	81.41	C	0.252137	TT	CC	CT	CT	CT	TT	CT	CT	CT	CT	CT	CT	CT	CC	CT	CT	TT	CC	CT	CT	CC	CT	TT	CT	TT	CC	CT	CC	CT	CT	CC	CT	TT	TT	CT	CT	CT	CT	CT	CC	CT	CT	TT	CT
Gm06_11270402	Gm06	11270402	84.28	C	0.260684	TT	CC	CT	CT	CT	TT	CT	CT	CT	CT	CT	CT	CT	CC	CT	CT	TT	CC	CT	CT	CC	CT	TT	CT	TT	CC	TT	CC	CT	CT	CC	CT	CT	TT	CT	CT	CT	TT	CT	CC	CT	CT	TT	CT
Gm06_12422813	Gm06	12422813	94.46	G	0.273504	GG	AA	GA	GA	GA	GG	GG	GA	GA	GG	GA	GG	GA	AA	AA	GA	GA	AA	AA	GG	GA	GA	GG	GA	GG	AA	GG	AA	GA	GA	AA	GA	GA	GG	GA	AA	GA	GG	GA	AA	GG	GA	GG	GA
Gm06_14217011	Gm06	14217011	111.12	T	0.286325	CC	TC	TC	TT	CC	CC	CC	TC	TC	TC	TC	TC	TC	TC	TC	TC	TT	TC	TT	CC	TC	TC	TC	TC	CC	TT	TC	TT	CC	TC	TC	TC	TC	CC	TC	TT	TC	CC	TC	TT	CC	TC	CC	TC
Gm06_14300668	Gm06	14300668	111.56	G	0.282051	CC	GC	GC	GG	CC	CC	CC	GC	GC	GC	GC	GC	GC	GC	GC	GC	GG	GC	GG	CC	GC	GC	GC	GC	CC	GG	GC	GG	CC	GC	GC	GC	GC	CC	GC	GG	GC	CC	GC	GG	CC	GC	CC	GC
Gm06_14300747	Gm06	14300747	111.77	G	0.282051	AA	GA	GA	GG	AA	AA	AA	GA	GA	GA	GA	GA	GA	GA	GA	GA	GG	GA	GG	AA	GA	GA	GA	GA	AA	GG	GA	GG	AA	GA	GA	GA	GA	AA	GA	GG	GA	AA	GA	GG	AA	GA	AA	GA
Gm06_14522965	Gm06	14522965	112.21	A	0.290598	GG	AG	AG	AA	GG	GG	GG	AG	AG	AG	AG	AG	AG	AG	AG	AG	AA	AG	AA	GG	AG	AG	AG	AG	GG	AA	AG	AA	GG	AG	AG	AG	AG	GG	AG	AA	AG	GG	AG	AA	GG	AG	GG	AG
Gm06_14743770	Gm06	14743770	112.42	T	0.290598	CC	TC	TC	TT	CC	CC	CC	TC	TC	TC	TC	TC	TC	TC	TC	TC	TT	TC	TT	CC	TC	TC	TC	TC	CC	TT	TC	TT	CC	TC	TC	TC	TC	CC	TC	TT	TC	CC	TC	TT	CC	TC	CC	TC
Gm06_14913024	Gm06	14913024	114.38	C	0.282051	TT	CT	CT	CC	CT	TT	TT	CT	CT	CT	CT	CT	CT	CT	CT	CT	CC	CT	CC	TT	CT	CT	CT	CT	TT	CC	CT	CT	TT	CT	CT	CT	CT	TT	CT	CC	CT	TT	CT	CC	TT	CT	TT	CT
Gm06_15023250	Gm06	15023250	116.35	C	0.269231	TT	CT	CT	CC	CT	TT	TT	CT	CT	CT	CT	CT	CT	CT	CT	CT	CC	CT	CC	TT	CT	CT	CT	CT	TT	CC	CT	CT	TT	CT	CT	CT	CT	TT	CT	CC	CT	TT	CT	CC	TT	CT	TT	CT
Gm06_15023227	Gm06	15023227	117.22	G	0.269231	TT	GT	GT	GG	GT	TT	TT	GT	GT	GT	GT	GT	GT	GT	GT	GT	GG	GT	GG	TT	GT	GT	GT	GT	TT	GG	GT	GT	TT	GT	GT	GT	GT	TT	GT	GG	GT	TT	GG	GG	TT	GT	TT	GT
Gm06_15743673	Gm06	15743673	125.62	T	0.324786	TT	TC	TC	CC	TC	TT	TT	CC	TC	TC	TC	CC	TC	TC	CC	TC	TC	TC	CC	CC	TC	TC	TC	TC	TT	CC	TC	TC	TT	TC	TC	TC	CC	CC	TC	CC	CC	TT	CC	CC	TT	TC	TT	CC
Gm06_15743660	Gm06	15743660	130.51	G	0.260684	GG	GA	GA	AA	GA	GG	GG	GA	GA	GA	GA	GA	GA	GA	GA	GA	GA	GA	AA	GG	GA	GA	GA	GA	GG	AA	GA	GA	GG	GA	GA	GA	AA	GG	GA	AA	GA	GG	GA	AA	GG	GA	GG	AA
Gm06_15734887	Gm06	15734887	130.73	A	0.25641	GG	AG	AG	AA	AG	GG	GG	AG	AG	AG	AG	AG	AG	AG	AG	AG	AG	AG	AA	GG	AG	AG	AG	AG	GG	AA	AG	AG	GG	AG	AG	AG	AA	GG	AG	AA	AG	GG	AG	AA	GG	AG	GG	AA
Gm06_16049356	Gm06	16049356	132.92	C	0.273504	CC	CA	CA	AA	CA	CC	CC	CA	CA	CA	CA	CA	CA	CA	CA	CA	CA	CA	AA	CC	CA	CA	CC	CA	CC	AA	CA	CA	CC	CA	CA	CA	AA	CC	CA	AA	AA	CC	CA	AA	CC	CA	CA	AA
Gm06_16049399	Gm06	16049399	133.14	T	0.269231	TT	TC	TC	CC	TC	TT	TT	TC	TC	TC	TC	TC	TC	TC	TC	TC	TC	TC	CC	TT	TC	TC	TC	TC	TT	CC	TC	TC	TT	TC	TC	TC	CC	TT	TC	CC	CC	TT	TC	CC	TT	TC	TC	CC
Gm06_16049400	Gm06	16049400	133.35	G	0.264957	GG	GA	GA	AA	GA	GG	GG	GA	GA	GA	GA	GA	GA	GA	GA	GA	GA	GA	AA	GG	GA	GA	GA	GA	GG	AA	GA	GA	GG	GA	GA	GA	AA	GG	GA	AA	AA	GG	GA	AA	GG	GA	GA	AA
Gm06_16343262	Gm06	16343262	135.99	G	0.260684	GG	GA	GA	AA	GA	GG	GG	GA	GA	GA	GA	GA	GA	GA	GA	GA	GA	GA	AA	GG	GA	GA	GA	GA	GG	AA	GA	GA	GG	GA	GA	GA	AA	GG	GA	AA	AA	GG	GA	AA	GG	GA	AA	AA
Gm06_16683500	Gm06	16683500	136.2	G	0.264957	AA	GA	GA	GG	GA	AA	AA	GA	GA	GA	GA	GA	GA	GA	GA	GA	GA	GA	GG	AA	GA	GA	GA	GA	AA	GG	GA	GA	AA	GA	GA	GA	GG	AA	GA	GG	GG	AA	GA	GG	AA	GA	GG	GG
Gm06_16343227	Gm06	16343227	136.85	A	0.264957	AA	AG	AG	GG	AG	AA	AA	AG	AG	AG	AG	AG	AG	AG	AG	AG	AG	AG	GG	AA	AG	AG	AG	AG	AA	GG	AG	AG	AA	AG	AG	AG	GG	AA	AG	GG	GG	AA	AG	GG	AA	AG	GG	GG
Gm06_16967762	Gm06	16967762	137.72	A	0.264957	TT	AT	AT	AA	AT	TT	TT	AT	AT	AT	AT	AT	AT	AT	AT	AT	AT	AT	AA	TT	AT	AT	AT	AT	TT	AA	AT	AT	TT	AT	AT	AT	AA	TT	AT	AA	AA	TT	AT	AA	TT	AT	AA	AA
Gm06_16888130	Gm06	16888130	141.93	C	0.320513	TT	CT	CT	CC	CT	TT	TT	CC	CT	CT	CT	CC	CT	CT	CC	CT	CT	CT	CC	CC	CT	CT	CT	CT	TT	CC	CT	CT	TT	CT	CT	CT	CC	CC	CT	CC	CC	TT	CC	CC	TT	CT	CC	CC
Gm06_17324968	Gm06	17324968	143.45	G	0.316239	AA	GA	GA	GG	GA	AA	AA	GG	GA	GA	GA	GG	GA	GA	GG	GA	GA	GA	GG	GG	GA	GA	GA	GA	AA	GG	GA	GA	AA	GA	GA	GA	GG	GG	GA	GG	GG	AA	GG	GG	AA	GA	GG	GG
Gm06_17392179	Gm06	17392179	143.67	A	0.320513	GG	AG	AG	AA	AG	GG	GG	AA	AG	AG	AG	AA	AG	AG	AA	AG	AG	AG	AA	AA	AG	AG	AG	AG	GG	AA	AG	AG	GG	AG	AG	AG	AA	AA	AG	AA	AA	GG	AA	AA	GG	AG	AA	AA
Gm06_17584594	Gm06	17584594	144.1	G	0.324786	AA	GA	GA	GG	GA	AA	AA	GG	GA	GA	GA	GG	GA	GA	GG	GA	GA	GA	GG	GG	GA	GA	GA	GA	AA	GG	GA	GA	AA	GA	GA	GA	GG	GG	GA	GG	GG	AA	GG	GG	AA	GA	GG	GG
Gm06_17671547	Gm06	17671547	144.32	G	0.316239	AA	GA	GA	GG	GA	AA	AA	GG	GA	GA	GA	GG	GA	GA	GG	GA	GA	GA	GG	GG	GA	GA	GA	GA	AA	GG	GA	GA	AA	GA	GA	GA	GG	GG	GA	GG	GG	AA	GG	GG	AA	GA	GG	GG
Gm06_17584579	Gm06	17584579	144.54	A	0.324786	GG	AG	AG	AA	AG	GG	GG	AA	AG	AG	AG	AA	AG	AG	AA	AG	AG	AG	AA	AA	AG	AG	AG	AG	GG	AA	AG	AG	GG	AG	AG	AG	AA	AA	AG	AA	AA	GG	AA	AA	GG	AG	AA	AA
Gm06_17766724	Gm06	17766724	148.29	G	0.269231	AA	GA	GA	GG	GA	AA	AA	GA	GA	GA	GA	GA	GA	GA	GA	GA	GA	GA	GG	AA	GA	GA	GA	GA	AA	GG	GA	GA	AA	GA	GA	GA	GG	GA	GA	GG	GG	AA	GA	GG	AA	GA	GG	GG
Gm06_18595332	Gm06	18595332	148.51	T	0.273504	CC	TC	TC	TT	TC	CC	CC	TC	TC	TC	TC	TC	TC	TC	TC	TC	TC	TC	TT	CC	TC	TC	TC	TC	CC	TT	TC	TC	CC	TC	TC	TC	TT	TC	TC	TT	TT	CC	TC	TT	CC	TC	TT	TT
Gm06_18640870	Gm06	18640870	149.38	T	0.290598	AA	TA	TA	TT	TA	AA	AA	TA	TA	TA	TA	TT	TA	TA	TA	TA	TA	TA	TT	AA	TA	TA	TA	TA	AA	TT	TA	TA	AA	TA	TA	TA	TT	TA	TA	TT	TT	AA	TA	TT	AA	TA	TT	TT
Gm06_18640828	Gm06	18640828	150.25	C	0.294872	TT	CT	CT	CC	CT	TT	TT	CT	CT	CT	CT	CC	CT	CT	CT	CT	CT	CT	CC	TT	CT	CT	CT	CT	TT	CC	CT	CT	TT	CT	CT	CT	CC	CT	CT	CC	CC	TT	CT	CC	TT	CT	CC	CC
Gm06_18640835	Gm06	18640835	150.9	A	0.286325	TT	AT	AT	AA	AT	TT	TT	AT	AT	AT	AT	AT	AT	AT	AT	AT	AT	AT	AA	TT	AT	AT	AT	AT	TT	AA	AT	AT	TT	AT	AT	AT	AA	AT	AT	AA	AA	TT	AT	AA	TT	AT	AA	AA
Gm06_17935099	Gm06	17935099	153.53	C	0.32906	TT	CC	CT	CC	CT	TT	TT	CT	CT	CT	CT	CT	CT	CT	CT	CT	CT	CT	CC	TT	CT	CT	CT	CT	TT	CC	CT	CT	TT	CT	CT	CT	CC	CT	CT	CC	CC	TT	CT	CC	TT	CT	CC	CC
Gm06_17935120	Gm06	17935120	154.4	T	0.311966	GG	TT	TG	TT	TG	GG	GG	TG	TG	TG	TG	TG	TG	TG	TG	TG	TG	TG	TT	GG	TG	TG	TG	TG	GG	TT	TG	TG	GG	TG	TG	TG	TT	TG	TG	TT	TT	GG	TG	TT	GG	TG	TT	TT
Gm06_18788611	Gm06	18788611	156.58	A	0.286325	GG	AG	AG	AA	AG	GG	GG	AG	AG	AG	AG	AG	AG	AG	AG	AG	AG	AG	AA	GG	AG	AG	AG	AG	GG	AA	AG	AG	GG	AG	AG	AG	AA	AG	AG	AA	AA	GG	AG	AA	GG	AG	AA	AA
Gm06_19497467	Gm06	19497467	158.77	A	0.269231	GG	AG	AG	AA	AG	GG	GG	AG	AG	AG	AG	AG	AG	AG	AG	AG	AG	AG	AA	GG	AG	AG	AG	AG	GG	AA	AG	AG	GG	GG	AG	AG	AA	AG	AG	AA	AA	GG	AG	AA	AG	AG	AA	AA
Gm06_19431005	Gm06	19431005	159.42	T	0.282051	CC	TC	TC	TT	TC	CC	CC	TT	TC	TC	TC	TC	TC	TC	TC	TC	TC	TC	TT	CC	TC	TC	TC	TC	CC	TT	TC	TC	CC	CC	TC	TC	TT	TC	TC	TT	TT	CC	TC	TT	TC	TC	TT	TT
Gm06_19306852	Gm06	19306852	162.95	T	0.32906	CC	TC	TC	TT	TC	CC	CC	TT	TC	TC	TC	TT	TC	TC	TT	TC	TC	TC	TT	TT	TC	TC	TC	TC	CC	TT	TC	TC	CC	CC	TC	TC	TT	TT	TC	TT	TT	CC	TT	TT	CC	TC	TT	TT
Gm06_19497472	Gm06	19497472	163.82	C	0.320513	TT	CT	CT	CC	CT	TT	TT	CC	CT	CT	CT	CC	CT	CT	CC	CT	CT	CT	CC	CC	CT	CT	CT	CT	TT	CC	CT	CT	TT	TT	CT	CT	CC	CC	CT	CC	CC	TT	CC	CC	CT	CT	CC	CC
Gm06_19805083	Gm06	19805083	164.47	A	0.320513	GG	AG	AG	AA	AG	GG	GG	AA	AG	AG	AG	AA	AG	AG	AA	AG	AG	AG	AA	AA	AG	AG	AG	AG	GG	AA	AG	AG	GG	GG	AG	AG	AA	AA	AG	AA	AA	GG	AA	AA	AG	AG	AA	AA
Gm06_32906140	Gm06	32906140	167.32	G	0.316239	AA	GA	GA	GG	GA	AA	AA	GG	GA	GA	GA	GG	GA	GA	GG	GA	GA	GA	GG	GG	GA	GA	GA	GA	AA	GG	AA	GA	AA	AA	GA	GA	GG	GG	GA	GG	GG	AA	GG	GG	GA	GA	GG	GG
Gm06_32906167	Gm06	32906167	167.54	C	0.316239	TT	CT	CT	CC	CT	TT	TT	CC	CT	CT	CT	CC	CT	CT	CC	CT	CT	CT	CC	CC	CT	CT	CT	CT	TT	CC	TT	CT	TT	TT	CT	CT	CC	CC	CT	CC	CC	TT	CC	CC	CT	CT	CC	CC
Gm06_30507278	Gm06	30507278	167.76	A	0.316239	GG	AG	AG	AA	AG	GG	GG	AA	AG	AG	AG	AA	AG	AG	AA	AG	AG	AG	AA	AA	AG	AG	AG	AG	GG	AA	GG	AG	GG	GG	AG	AG	AA	AA	AG	AA	AA	GG	AA	AA	AG	AG	AA	AA
Gm06_30001940	Gm06	30001940	169.06	G	0.32906	AA	GA	GA	GG	GA	AA	AA	GG	GA	GA	GA	GG	GA	GA	GG	GA	GA	GA	GG	GG	GA	GA	GG	GA	AA	GG	AA	GA	AA	AA	GA	GA	GG	GG	GA	GG	GG	AA	GG	GG	GA	GA	GG	GG
Gm06_30001968	Gm06	30001968	169.28	G	0.324786	TT	GT	GT	GG	GT	TT	TT	GG	GT	GT	GT	GG	GT	GT	GG	GT	GT	GT	GG	GG	GT	GT	GG	GT	TT	GG	TT	GT	TT	TT	GT	GT	GG	GG	GT	GG	GG	TT	GG	GG	GT	GT	GG	GG
Gm06_33453982	Gm06	33453982	171.69	A	0.333333	TT	AT	AT	AA	AT	TT	TT	AA	AT	AT	AT	AA	AT	AT	AA	AT	AT	AT	AA	AA	AT	AT	AT	AT	TT	AA	TT	AT	TT	TT	AT	AT	AA	AA	AT	AA	AA	TT	AA	AA	AT	AT	AA	AA
Gm06_29874313	Gm06	29874313	173.66	C	0.316239	TT	CT	CT	CC	CT	TT	TT	CC	CT	CT	CT	CC	CT	CT	CC	CT	CT	CT	CC	CC	CT	CT	CT	CT	TT	CC	TT	CT	TT	TT	CT	CT	CC	CC	CT	CC	CC	TT	CC	CC	CT	CT	CC	CC
Gm06_30745347	Gm06	30745347	174.31	G	0.316239	AA	GA	GA	GG	GA	AA	AA	GG	GA	GA	GA	GG	GA	GA	GG	GA	GA	GA	GG	GG	GA	GA	GA	GA	AA	GG	AA	GA	AA	AA	GA	GA	GG	GG	GA	GG	GG	AA	GG	GG	GA	GA	GG	GG
Gm06_33388675	Gm06	33388675	174.75	A	0.316239	GG	AG	AG	AA	AG	GG	GG	AA	AG	AG	AG	AA	AG	AG	AA	AG	AG	AG	AA	AA	AG	AG	AG	AG	GG	AA	GG	AG	GG	GG	AG	AG	AA	AA	AG	AA	AA	GG	AA	AA	AG	AG	AA	AA
Gm06_33214182	Gm06	33214182	175.18	A	0.316239	GG	AG	AG	AA	AG	GG	GG	AA	AG	AG	AG	AA	AG	AG	AA	AG	AG	AG	AA	AA	AG	AG	AG	AG	GG	AA	GG	AG	GG	GG	AG	AG	AA	AA	AG	AA	AA	GG	AA	AA	AG	AG	AA	AA
Gm06_34826615	Gm06	34826615	175.83	A	0.320513	GG	AG	AG	AA	AG	GG	GG	AA	AG	AG	AG	AA	AG	AG	AA	AG	AG	AG	AA	AA	AG	AG	AG	AG	GG	AA	GG	AG	GG	GG	AG	AG	AA	AA	AG	AA	AA	GG	AA	AA	AG	AG	AA	AA
Gm06_34954547	Gm06	34954547	176.27	T	0.320513	AA	TA	TA	TT	TA	AA	AA	TT	TA	TA	TA	TT	TA	TA	TT	TA	TA	TA	TT	TT	TA	TA	TA	TA	AA	TT	AA	TA	AA	AA	TA	TA	TT	TT	TA	TT	TT	AA	TT	TT	TA	TA	TT	TT
Gm06_35157466	Gm06	35157466	177.14	A	0.32906	GG	AG	AG	AA	AG	GG	GG	AA	AG	AG	AG	AA	AG	AA	AA	AG	AG	AG	AA	AA	AG	AG	AG	AG	GG	AA	GG	AG	GG	GG	AG	AA	AA	AA	AG	AA	AA	GG	AA	AA	AG	AG	AA	AA
Gm06_35157418	Gm06	35157418	177.79	C	0.333333	TT	CT	CT	CC	CT	TT	TT	CC	CT	CT	CT	CC	CT	CC	CC	CT	CT	CT	CC	CC	CT	CT	CT	CT	TT	CC	TT	CT	TT	TT	CT	CT	CC	CC	CT	CC	CC	TT	CC	CC	CT	CT	CC	CC
Gm06_36428886	Gm06	36428886	178.87	T	0.324786	CC	TC	TC	TT	TC	CC	CC	TT	TC	TC	TC	TT	TC	TC	TT	TC	TC	TC	TT	TT	TC	TC	TC	TC	CC	TT	CC	TC	CC	CC	TC	TC	TT	TT	TC	TT	TT	CC	TT	TT	TC	TC	TT	TT
Gm06_37845491	Gm06	37845491	179.96	T	0.32906	CC	TC	TC	TT	TC	CC	CC	TT	TC	TC	TC	TT	TC	TC	TT	TC	TC	TC	TT	TT	TC	TC	TC	TC	CC	TT	CC	TC	CC	CC	TC	TC	TT	TT	TC	TT	TT	CC	TT	TT	TC	TC	TT	TT
Gm06_37845517	Gm06	37845517	180.18	A	0.324786	GG	AG	AG	AA	AG	GG	GG	AA	AG	AG	AG	AA	AG	AG	AA	AG	AG	AG	AA	AA	AG	AG	AG	AG	GG	AA	GG	AG	GG	GG	AG	AG	AA	AA	AG	AA	AA	GG	AA	AA	AG	AG	AA	AA
Gm06_37293094	Gm06	37293094	180.83	C	0.320513	TT	CT	CT	CC	CT	TT	TT	CC	CT	CT	CT	CC	CT	CT	CC	CT	CT	CT	CC	CC	CT	CT	CT	CT	TT	CC	TT	CT	TT	TT	CT	CT	CC	CC	CT	CC	CC	TT	CC	CC	CT	CT	CC	CC
Gm06_37355113	Gm06	37355113	181.26	T	0.320513	CC	TC	TC	TT	TC	CC	CC	TT	TC	TC	TC	TT	TC	TC	TT	TC	TC	TC	TT	TT	TC	TC	TC	TC	CC	TT	CC	TC	CC	CC	TC	TC	TT	TT	TC	TT	TT	CC	TT	TT	TC	TC	TT	TT
Gm06_37778966	Gm06	37778966	181.7	A	0.316239	GG	AG	AG	AA	AG	GG	GG	AA	AG	AG	AG	AA	AG	AG	AA	AG	AG	AG	AA	AA	AG	AG	AG	AG	GG	AA	GG	AG	GG	GG	AG	AG	AA	AA	AG	AA	AA	GG	AA	AA	AG	AG	AA	AA
Gm06_38131124	Gm06	38131124	182.13	A	0.320513	GG	AG	AG	AA	AG	GG	GG	AA	AG	AG	AG	AA	AG	AG	AA	AG	AG	AG	AA	AA	AG	AG	AG	AG	GG	AA	GG	AG	GG	GG	AG	AG	AA	AA	AG	AA	AA	GG	AA	AA	AG	AG	AA	AA
Gm06_38328718	Gm06	38328718	183	A	0.32906	GG	AG	AG	AA	AA	GG	GG	AA	AG	AG	AG	AA	AG	AG	AA	AG	AG	AG	AA	AA	AG	AG	AG	AG	GG	AA	GG	AG	GG	GG	AG	AG	AA	AA	AG	AA	AA	GG	AA	AA	AA	AA	AA	AA
Gm06_38328767	Gm06	38328767	183.22	T	0.324786	AA	TA	TA	TT	TA	AA	AA	TT	TA	TA	TA	TT	TA	TA	TT	TA	TA	TA	TT	TT	TA	TA	TA	TA	AA	TT	AA	TA	AA	AA	TA	TA	TT	TT	TA	TT	TT	AA	TT	TT	TT	TT	TT	TT
Gm06_38328760	Gm06	38328760	183.43	C	0.320513	TT	CT	CT	CC	CT	TT	TT	CC	CT	CT	CT	CC	CT	CT	CC	CT	CT	CT	CC	CC	CT	CT	CT	CT	TT	CC	TT	CT	TT	TT	CT	CT	CC	CC	CT	CC	CC	TT	CC	CC	CC	CT	CC	CC
Gm06_38774454	Gm06	38774454	184.3	C	0.316239	TT	CT	CT	CC	CT	TT	TT	CC	CT	CT	CT	CC	CT	CT	CC	CT	CT	CT	CC	CC	CT	CT	CT	CT	TT	CC	TT	CT	TT	TT	CT	CT	CC	CC	CT	CC	CC	TT	CC	CC	CT	CT	CC	CC
Gm06_41061070	Gm06	41061070	185.39	G	0.316239	CC	GC	GC	GG	GC	CC	CC	GG	GC	GC	GC	GG	GC	GC	GG	GC	GC	GC	GG	GG	GC	GC	GC	GC	CC	GG	CC	GC	CC	CC	GC	GC	GG	GG	GC	GG	GG	CC	GG	GG	GC	GC	GG	GG
Gm06_41061098	Gm06	41061098	186.26	G	0.333333	AA	GA	GA	GG	GA	AA	AA	GG	GA	GA	GG	GG	GG	GA	GG	GA	GA	GA	GG	GG	GA	GA	GA	GA	AA	GG	AA	GA	AA	AA	GA	GA	GG	GG	GA	GG	GG	AA	GG	GG	GA	GA	GG	GG
Gm06_41061109	Gm06	41061109	187.57	A	0.333333	TT	AT	AT	AA	AT	TT	TT	AA	AT	AT	AA	AA	AT	AT	AA	AT	AT	AT	AA	AA	AT	AT	AT	AT	TT	AA	TT	AT	TT	TT	AT	AT	AA	AA	AT	AA	AA	TT	AA	AA	AT	AT	AA	AA
Gm06_39768514	Gm06	39768514	188.65	A	0.311966	GG	AG	AG	AA	AG	GG	GG	AA	AG	AG	AG	AA	AG	AG	AA	AG	AG	AG	AA	AA	AG	AG	AG	AG	GG	AA	GG	AG	GG	GG	AG	AG	AA	AA	AG	AA	AA	GG	AA	AA	AG	AG	AA	AA
Gm06_41289065	Gm06	41289065	189.09	T	0.320513	CC	TC	TC	TT	TC	CC	CC	TT	TC	TC	TC	TT	TC	TC	TT	TC	TC	TC	TT	TT	TC	TC	TC	TC	CC	TT	CC	TC	CC	CC	TC	TC	TT	TT	TC	TT	TT	CC	TT	TT	TC	TC	TT	TT
Gm06_42074427	Gm06	42074427	190.19	C	0.324786	AA	CA	CA	CC	CA	AA	AA	CC	CA	CA	CA	CC	CA	CA	CC	CA	CA	CA	CC	CC	CA	CA	CA	CA	AA	CC	AA	CA	AA	AA	CA	CA	CC	CC	CA	CC	CC	AA	CC	CC	CA	CA	CC	CC
Gm06_40419459	Gm06	40419459	191.29	A	0.303419	GG	AG	AG	AA	AG	GG	GG	AA	AG	AG	AG	AA	AG	AG	AA	AG	AG	AG	AA	AA	GG	AG	AG	AG	GG	AA	GG	AG	GG	GG	AG	AG	AA	AA	AG	AA	AA	GG	AA	AA	AG	AG	AA	AA
Gm06_39645872	Gm06	39645872	191.51	A	0.307692	CC	AC	AC	AA	AC	CC	CC	AA	AC	AC	AC	AA	AC	AC	AA	AC	AC	AC	AA	AA	AC	AC	AC	AC	CC	AA	CC	AC	CC	CC	AC	AC	AA	AA	AC	AA	AA	CC	AA	AA	AC	AC	AA	AA
Gm06_39399422	Gm06	39399422	192.16	T	0.316239	GG	TG	TG	TT	TG	GG	GG	TT	TG	TG	TG	TT	TG	TG	TT	TG	TG	TT	TT	TT	TG	TG	TG	TG	GG	TT	GG	TG	GG	GG	TG	TG	TT	TT	TG	TT	TT	GG	TT	TT	TG	TG	TT	TT
Gm06_39294126	Gm06	39294126	192.37	A	0.311966	GG	AG	AG	AA	AG	GG	GG	AA	AG	AG	AG	AA	AG	AG	AA	AG	AG	AG	AA	AA	AG	AG	AG	AG	GG	AA	GG	AG	GG	GG	AG	AG	AA	AA	AG	AA	AA	GG	AA	AA	AG	AG	AA	AA
Gm06_38774572	Gm06	38774572	192.81	C	0.316239	TT	CT	CT	CC	CT	TT	TT	CC	CT	CT	CT	CC	CT	CT	CC	CT	CT	CT	CC	CC	CT	CT	CT	CT	TT	CC	TT	CT	TT	TT	CT	CT	CC	CC	CT	CC	CC	TT	CC	CC	CT	CT	CC	CC
Gm06_38412594	Gm06	38412594	193.02	C	0.320513	TT	CT	CT	CC	CT	TT	TT	CC	CT	CT	CT	CC	CT	CT	CC	CT	CT	CT	CC	CC	CT	CT	CT	CT	TT	CC	TT	CT	TT	TT	CT	CT	CC	CC	CT	CC	CC	TT	CC	CC	CT	CT	CC	CC
Gm06_36880732	Gm06	36880732	193.24	A	0.316239	CC	AC	AC	AA	AC	CC	CC	AA	AC	AC	AC	AA	AC	AC	AA	AC	AC	AC	AA	AA	AC	AC	AC	AC	CC	AA	CC	AC	CC	CC	AC	AC	AA	AA	AC	AA	AA	CC	AA	AA	AC	AC	AA	AA
Gm06_34901943	Gm06	34901943	193.45	A	0.316239	GG	AG	AG	AA	AG	GG	GG	AA	AG	AG	AG	AA	AG	AG	AA	AG	AG	AG	AA	AA	AG	AG	AG	AG	GG	AA	GG	AG	GG	GG	AG	AG	AA	AA	AG	AA	AA	GG	AA	AA	AG	AG	AA	AA
Gm06_30800206	Gm06	30800206	193.67	G	0.311966	CC	GC	GC	GG	GC	CC	CC	GG	GC	GC	GC	GG	GC	GC	GG	GC	GC	GC	GG	GG	GC	GC	GC	GC	CC	GG	CC	GC	CC	CC	GC	GC	GG	GG	GC	GG	GG	CC	GG	GG	GC	GC	GG	GG
Gm06_33801116	Gm06	33801116	197.2	A	0.260684	GG	AG	AG	AA	AG	GG	GG	GG	AG	AG	AG	AG	AG	AG	AG	AG	AG	AG	AA	GG	AG	AG	AG	AG	GG	AA	GG	AG	GG	GG	AG	AG	AA	AG	AG	AA	AA	GG	AG	AA	AG	AG	AA	AA
Gm06_34512156	Gm06	34512156	197.42	A	0.264957	GG	AG	AG	AA	AG	GG	GG	GG	AG	AG	AG	AG	AG	AG	AG	AG	AG	AG	AA	GG	AG	AG	AG	AG	GG	AA	GG	AG	GG	GG	AG	AG	AA	AG	AG	AA	AA	GG	AG	AA	AG	AG	AA	AA
Gm06_40715157	Gm06	40715157	198.95	T	0.25641	CC	TC	TC	TT	TC	CC	CC	CC	TC	TC	TC	TC	TC	TC	TC	TC	TC	TC	TT	CC	TC	TC	TC	TC	CC	TT	CC	TC	CC	CC	TC	TC	TT	TC	TC	TT	TT	CC	TC	TT	TC	TC	TT	TT
Gm06_42163184	Gm06	42163184	199.16	C	0.252137	TT	CT	CT	CC	CT	TT	TT	TT	CT	CT	CT	CT	CT	CT	CT	CT	CT	CT	CC	TT	CT	CT	CT	CT	TT	CC	TT	CT	TT	TT	CT	CT	CC	CT	CT	CC	CC	TT	CT	CC	CT	CT	CC	CC
Gm06_44115749	Gm06	44115749	199.59	C	0.252137	GG	CG	CG	CC	CG	GG	GG	GG	CG	CG	CG	CG	GG	CG	CG	CG	CG	CG	CC	GG	CG	CG	CG	CG	GG	CC	GG	CG	GG	GG	CG	CG	CC	CG	CG	CG	CC	GG	CG	CC	CG	CG	CC	CC
Gm06_44031430	Gm06	44031430	199.81	G	0.252137	TT	GT	GT	GG	GT	TT	TT	TT	GT	GT	GT	GT	TT	GT	GT	GT	GT	GT	GG	TT	GT	GT	GT	GT	TT	GG	TT	GT	TT	TT	GT	GT	GG	GT	GT	GT	GG	TT	GT	GG	GT	GT	GG	GG
Gm06_43868397	Gm06	43868397	200.46	C	0.252137	AA	CA	CA	CC	CA	AA	AA	AA	CA	CA	CA	CA	AA	CA	CA	CA	CA	CA	CC	AA	CA	CA	CA	CA	AA	CC	AA	CA	AA	AA	CA	CA	CC	CA	CA	CA	CC	AA	CA	CC	CA	CA	CC	CC
Gm06_44354049	Gm06	44354049	201.55	T	0.25641	AA	TA	TT	TT	TA	AA	AA	AA	TA	TT	TA	TA	AA	TA	TA	TA	TA	TA	TT	AA	TA	TA	TA	TA	AA	TT	AA	TA	AA	AA	TA	TA	TT	TA	TA	TA	TT	AA	TA	TT	TA	TA	TT	TT
Gm06_44671641	Gm06	44671641	202.86	A	0.260684	GG	AG	AA	AA	AG	GG	GG	GG	AG	AA	AG	AG	GG	AG	AG	AG	AG	AG	AA	GG	AG	AG	AG	AG	GG	AA	GG	AG	GG	GG	AG	AG	AA	AG	AG	AG	AA	GG	AG	AA	AG	AG	AA	AA
Gm06_45852782	Gm06	45852782	210.32	T	0.294872	TT	TC	CC	CC	TC	TT	TT	CC	TC	CC	TC	CC	TT	TC	CC	TC	TC	TC	TC	CC	TC	TC	TC	TC	TT	CC	TT	TC	TT	TT	TC	TC	CC	CC	TC	CC	CC	TT	CC	CC	TC	TC	CC	CC
Gm06_45753617	Gm06	45753617	210.54	T	0.299145	CC	TC	TT	TT	TC	CC	CC	TT	TC	TT	TC	TT	CC	TT	TT	TC	TC	TC	TC	TT	TC	TC	TC	TC	CC	TT	CC	TC	CC	CC	TC	TC	TT	TT	TC	TT	TT	CC	TT	TT	TC	TC	TT	TT
Gm06_45995267	Gm06	45995267	211.62	A	0.290598	AA	AT	TT	TT	AT	AA	AA	TT	AT	TT	AT	TT	AA	AT	TT	AT	AT	AT	AT	TT	AT	AT	AT	AT	AA	TT	AA	AT	AA	AA	AT	AT	TT	TT	AT	TT	TT	AA	TT	TT	AT	AT	TT	TT
Gm06_46312407	Gm06	46312407	212.93	T	0.299145	CC	TC	TT	TT	TC	CC	CC	TT	TC	TT	TC	TT	CC	TC	TT	TC	TC	TC	TC	TT	TC	TC	TC	TC	CC	TT	CC	TC	CC	CC	TC	TC	TT	TT	TT	TT	TT	CC	TT	TT	TC	TC	TT	TT
Gm06_46795168	Gm06	46795168	214.01	A	0.303419	TT	AT	AA	AA	AT	TT	TT	AA	AT	AA	AT	AA	TT	AT	AA	AT	AT	AA	AT	AA	AT	AT	AT	AT	TT	AA	TT	AT	TT	TT	AT	AT	AA	AA	AA	AA	AA	TT	AA	AT	AT	AT	AA	AA
Gm06_46795225	Gm06	46795225	214.23	A	0.303419	GG	AG	AA	AA	AG	GG	GG	AA	AG	AA	AG	AA	GG	AG	AA	AG	AG	AA	AG	AA	AG	AG	AG	AG	GG	AA	GG	AG	GG	GG	AG	AG	AA	AA	AA	AA	AA	GG	AA	AG	AG	AG	AA	AA
Gm06_46758444	Gm06	46758444	214.66	T	0.299145	CC	TC	TT	TT	TC	CC	CC	TT	TC	TT	TC	TT	CC	TC	TT	TC	TC	TT	TC	TT	TC	TC	TC	TC	CC	TT	CC	TC	CC	CC	TC	TC	TT	TT	TT	TT	TT	CC	TT	TC	TC	TC	TT	TT
Gm06_47255727	Gm06	47255727	215.53	T	0.299145	TT	TA	AA	AA	TA	TT	TT	AA	TA	AA	TA	AA	TT	TA	AA	TA	TA	AA	TA	AA	TA	TT	TA	TA	TT	AA	TT	TA	TT	TT	TA	TA	AA	AA	AA	AA	AA	TT	AA	TA	TA	TA	AA	AA
Gm06_47131055	Gm06	47131055	215.75	G	0.303419	AA	GA	GG	GG	GA	AA	AA	GG	GA	GG	GA	GG	AA	GA	GG	GA	GA	GG	GA	GG	GA	AA	GA	GA	AA	GG	AA	GA	AA	AA	GA	GA	GG	GG	GG	GG	GG	AA	GG	GA	GA	GA	GG	GG
Gm06_47355302	Gm06	47355302	216.18	T	0.294872	TT	TA	AA	AA	TA	TT	TT	AA	TA	AA	TA	AA	TT	TA	AA	TA	TA	AA	TA	AA	TA	TT	TA	TA	TT	AA	TT	TA	TT	TT	TA	TA	AA	AA	AA	AA	AA	TT	AA	TA	TA	TA	AA	AA
Gm06_47723554	Gm06	47723554	217.05	A	0.290598	GG	AG	AA	AA	AG	AG	GG	AA	AG	AA	AG	AA	GG	AG	AA	AG	AG	AA	AG	AA	AG	GG	AG	AG	GG	AA	GG	AG	GG	GG	AG	AG	AA	AA	AA	AA	AA	GG	AA	AG	AG	AG	AA	AA
Gm06_47527012	Gm06	47527012	217.92	A	0.303419	TT	AT	AA	AA	AT	AT	TT	AA	AT	AA	AT	AA	TT	AT	AA	AT	AT	AA	AT	AA	AT	TT	AT	AT	TT	AA	TT	AT	TT	TT	AT	AT	AA	AA	AA	AA	AA	TT	AA	AT	AT	AT	AA	AA
Gm06_47850344	Gm06	47850344	219.23	T	0.299145	GG	TG	TT	TT	TG	TG	GG	TT	TG	TT	TG	TT	GG	TG	TT	TG	TT	TT	TG	TT	TG	GG	TG	TG	GG	TT	GG	TG	GG	GG	TG	TG	TT	TT	TT	TT	TT	GG	TT	TG	TG	TG	TT	TT
Gm06_47948502	Gm06	47948502	221.86	T	0.303419	TT	TC	CC	CC	TC	TC	TT	CC	TC	CC	TC	CC	TT	TC	CC	TC	CC	CC	TC	CC	TC	TT	TC	CC	TT	CC	TT	TC	TT	TT	TC	TC	TC	CC	CC	CC	CC	TT	CC	TC	TC	TC	CC	CC
Gm06_48028183	Gm06	48028183	228.12	T	0.316239	CC	TC	TT	TT	TT	TC	CC	CC	TC	TT	TC	TC	CC	TC	TT	TC	TT	TT	TC	CC	TC	CC	TC	TT	CC	TT	CC	TC	CC	CC	TC	TC	TC	CC	TT	TC	TT	CC	TC	TC	TC	TC	TT	TT
Gm06_49161950	Gm06	49161950	250.84	A	0.273504	AA	AA	CC	CC	AA	AC	AC	CC	AC	CC	AC	AA	AA	AC	AC	AC	CC	CC	AC	AA	AC	AA	AC	CC	AC	AC	AA	AC	AA	CC	AC	AC	AC	AA	CC	AC	AC	AC	CC	AC	AA	CC	CC	CC
Gm06_49323129	Gm06	49323129	251.49	G	0.277778	GA	AA	GG	GG	AA	GA	GA	GG	GA	GG	GA	AA	AA	GA	GA	GA	GG	GG	GA	AA	GA	AA	GA	GG	GA	GA	AA	GA	AA	GG	GA	GA	GA	AA	GG	GA	GA	GA	GG	GA	AA	GG	GG	GG
Gm06_49323123	Gm06	49323123	253.46	T	0.282051	TA	TT	AA	AA	TT	TA	TA	TT	TA	AA	TA	TT	TT	TA	TA	TA	AA	AA	TA	TT	TA	TT	TA	AA	TA	TA	TT	TA	TT	TT	TA	TA	TA	TT	AA	TA	TA	TA	AA	TA	TT	AA	AA	AA
Gm06_49548482	Gm06	49548482	254.77	A	0.286325	AG	AA	GG	GG	AA	AG	AG	AA	AG	GG	AG	AA	AA	AG	AG	AG	GG	GG	AA	AG	AG	AA	AG	GG	AG	AG	AA	AG	AA	AA	AG	AG	AG	AA	GG	AG	AG	AG	GG	AG	AA	GG	GG	GG
Gm06_49548476	Gm06	49548476	254.98	G	0.282051	GC	GG	CC	CC	GG	GC	GC	GG	GC	CC	GC	GG	GG	GC	GC	GC	CC	CC	GG	GC	GC	GG	GC	CC	GC	GC	GG	GC	GG	GG	GC	GC	GC	GG	CC	GC	GC	GC	CC	GC	GG	CC	CC	CC
Gm06_49548432	Gm06	49548432	255.64	C	0.277778	CA	CC	AA	AA	CC	CA	CA	CC	CA	AA	CA	CC	CC	CA	CA	CA	AA	AA	CA	CA	CA	CC	CA	AA	CA	CA	CC	CA	CC	CC	CA	CA	CA	CC	AA	CA	CA	CA	AA	CA	CC	AA	AA	AA
Gm06_49937791	Gm06	49937791	260.52	G	0.277778	GA	AA	GA	GG	AA	GA	GA	AA	GA	GG	GA	AA	AA	GA	GG	AA	GG	GG	GA	GA	GA	AA	GA	GG	GA	GA	AA	GA	GA	AA	GA	GA	GA	AA	GG	GA	GA	GA	GG	GA	AA	GG	GG	GA
Gm06_50139125	Gm06	50139125	261.39	C	0.277778	CA	AA	CA	CC	AA	CA	CA	AA	CA	CC	CA	AA	AA	CA	CC	AA	CC	CC	CA	CA	CA	AA	CA	CC	CA	CA	AA	CA	CA	AA	CA	CA	CA	AA	CC	CA	CA	CA	CC	CA	AA	CC	CC	CA
Gm06_50970964	Gm06	50970964	268.14	G	0.264957	GA	GA	GA	GG	AA	GA	GA	AA	GA	GG	GA	AA	GA	GA	GG	AA	GG	GG	GA	GA	GG	AA	GA	GG	GA	GA	AA	GA	GA	AA	AA	GA	GA	AA	GG	GA	GA	GA	GG	GA	AA	GG	GG	GA
Gm07_41861663	Gm07	41861663	0	A	0.320513	AG	AA	AA	AG	AG	AG	AG	GG	AG	GG	AA	GG	AG	GG	GG	AG	GG	AG	AG	GG	AG	AG	AG	AG	AA	AA	GG	AA	GG	GG	AG	AG	AG	GG	AG	GG	GG	AA	GG	AG	AG	AA	GG	AG
Gm07_39115259	Gm07	39115259	15.94	T	0.24359	CC	CC	CC	TT	TC	TC	TC	TC	TC	TC	CC	TC	TC	TC	TC	TC	TT	TC	TC	TC	TC	TC	TC	TC	TC	CC	TT	CC	TT	CC	TT	TC	TC	TT	TC	TC	TT	CC	TT	TC	TC	TC	TT	TC
Gm07_37789002	Gm07	37789002	22.23	C	0.247863	CC	CC	CC	TT	CT	CT	CT	CT	CT	CT	CC	CT	CT	CT	CT	CT	TT	CT	CT	CC	CT	CT	CC	CT	CT	CC	TT	CC	TT	CC	CT	CT	CT	TT	CT	CT	TT	CC	TT	CT	CC	CT	TT	CC
Gm07_37659410	Gm07	37659410	22.44	T	0.239316	TT	TT	TT	CC	TC	TC	TC	TC	TC	TC	TT	TC	TC	TC	TC	TC	CC	TC	TC	TT	TC	TC	TT	TC	TC	TT	CC	TT	CC	TT	TC	TC	TC	CC	TC	TC	CC	TT	CC	TC	TT	TC	CC	TT
Gm07_37574248	Gm07	37574248	24.41	G	0.252137	GG	GG	GG	AA	GA	GA	GA	GA	GA	GA	GG	GA	GA	GA	GA	GA	AA	GG	GA	GG	GA	GA	GG	GA	GA	GG	GA	GG	AA	GG	GA	GA	GA	AA	GA	GA	AA	GG	AA	GA	GG	GA	AA	GG
Gm07_37574266	Gm07	37574266	24.63	A	0.25641	AA	AA	AA	GG	AG	AG	AG	AG	AG	AG	AA	AG	AG	AG	AG	AA	GG	AA	AG	AA	AG	AG	AA	AG	AG	AA	AG	AA	GG	AA	AG	AG	AG	GG	AG	AG	GG	AA	GG	AG	AA	AG	GG	AA
Gm07_37574249	Gm07	37574249	25.06	T	0.247863	TT	TT	TT	CC	TC	TC	TC	TC	TC	TC	TT	TC	TC	TC	TC	TC	CC	TT	TC	TT	TC	TC	TT	TC	TC	TT	TC	TT	CC	TT	TC	TC	TC	CC	TC	TC	CC	TT	CC	TC	TT	TC	CC	TT
Gm07_37206761	Gm07	37206761	26.81	A	0.222222	AA	AA	AA	CC	AC	AC	AC	AC	AC	AC	AA	AC	AC	AC	AC	AC	CC	AC	AC	AA	AC	AC	AA	AC	AC	AA	AC	AA	CC	AA	AC	AC	AC	CC	AC	AC	CC	AA	CC	AC	AA	AC	CC	AA
Gm07_37093873	Gm07	37093873	27.25	G	0.230769	TT	TT	TT	GG	GT	GT	GT	GT	GT	GT	TT	GT	GT	GT	GT	GT	GG	GT	TT	TT	GT	GT	TT	GT	GT	TT	GT	TT	GG	TT	GT	GT	GT	GG	GT	GT	GG	TT	GG	GT	TT	GT	GG	TT
Gm07_36796902	Gm07	36796902	28.33	G	0.230769	AA	GA	AA	GG	GA	GA	GA	GA	GA	GA	AA	GA	GG	GA	GA	GA	GG	GA	AA	AA	GA	GA	AA	GA	GA	AA	GA	AA	GG	AA	GA	GA	GA	GG	GA	GA	GG	AA	GG	GA	AA	GA	GG	AA
Gm07_36796887	Gm07	36796887	28.55	A	0.235043	GG	AG	GG	AA	AG	AG	AG	AG	AG	AG	GG	AG	AA	AG	AG	AG	AA	AG	GG	GG	AG	AG	GG	AG	AG	GG	AG	GG	AA	GG	AG	AG	AG	AA	AG	AG	AA	GG	AA	AG	GG	AG	AA	GG
Gm07_36398522	Gm07	36398522	30.52	A	0.235043	TT	AT	TT	AA	AT	AT	AT	AT	AT	AT	TT	AT	AA	AT	AT	AT	AT	AT	TT	TT	AT	AT	TT	AT	AT	TT	AT	TT	AA	TT	AT	AT	AT	AA	AT	AT	AA	TT	AA	TT	TT	AT	AA	TT
Gm07_36543743	Gm07	36543743	36.34	G	0.286325	GG	GT	GG	TT	GT	GT	GT	TT	GT	GT	GG	TT	TT	GT	TT	GT	GT	GT	GG	TT	GT	GT	GG	GT	GT	GG	GT	GG	TT	TT	GT	GT	GT	TT	GT	TT	TT	GG	TT	GG	GG	GT	TT	GG
Gm07_37001237	Gm07	37001237	37.87	G	0.299145	GG	GG	GG	CC	GC	GC	GC	CC	GC	GC	GG	CC	CC	GC	CC	GC	CC	GC	GG	CC	GC	GC	GG	GC	GC	GG	GC	GG	CC	CC	GC	GC	GC	CC	GC	CC	CC	GG	CC	GC	GG	GC	CC	GG
Gm07_36839617	Gm07	36839617	38.52	C	0.303419	AA	CA	AA	CC	CA	CA	CA	CC	CA	CA	AA	CC	CC	CA	CC	CA	CC	CA	AA	CC	CA	CA	AA	CA	CA	AA	CA	AA	CC	CC	CA	CA	CA	CC	CA	CC	CC	AA	CC	CA	AA	CA	CC	AA
Gm07_36663343	Gm07	36663343	39.17	A	0.290598	AA	AG	AA	GG	AG	AG	AG	GG	AG	AG	AA	GG	GG	AG	GG	AG	GG	AG	AA	GG	AG	AG	AA	AG	AG	AA	AG	AA	GG	GG	AG	AG	AG	GG	AG	GG	GG	AA	GG	AA	AA	AG	GG	AA
Gm07_36237738	Gm07	36237738	40.92	C	0.286325	TT	CT	TT	CC	CT	CT	CT	CC	CT	CT	TT	CC	CC	CT	CC	CT	CT	CT	TT	CC	TT	CT	TT	CT	CT	TT	CT	TT	CC	CC	CT	CT	CT	CC	CT	CC	CC	TT	CC	TT	TT	CT	CC	TT
Gm07_21079564	Gm07	21079564	60.72	C	0.260684	CT	CT	CC	TT	CT	CT	CT	CC	CT	CT	CT	CT	TT	CT	CC	TT	CC	CC	CC	CT	CC	TT	CT	CT	CT	CT	CT	TT	TT	CC	CT	CT	TT	TT	CC	CT	TT	CC	TT	CC	CC	CT	TT	CC
Gm07_14305481	Gm07	14305481	83.87	A	0.269231	AA	GG	AG	AA	GG	GG	AG	GG	AG	GG	AG	AG	AA	GG	AG	AG	GG	AG	AG	AG	AG	AG	AA	AA	AG	GG	AG	AA	AA	GG	AG	AG	AA	AA	AG	GG	AA	AG	AA	AG	AG	GG	AA	GG
Gm07_14216064	Gm07	14216064	84.09	A	0.269231	AA	GG	AG	AA	GG	GG	AG	GG	AG	GG	AG	AG	AA	GG	AG	AG	GG	AG	AG	AG	AG	AG	AA	AA	AG	GG	AG	AA	AA	GG	AG	AG	AA	AA	AG	GG	AA	AG	AA	AG	AG	GG	AA	GG
Gm07_14216092	Gm07	14216092	84.3	G	0.273504	GG	AA	GA	GG	AA	AA	GA	AA	GA	AA	GA	GA	GG	AA	GA	GA	AA	GA	GA	GA	GA	GA	GG	GG	GA	AA	GA	GG	GG	AA	GA	GA	GG	GG	GA	AA	GG	GA	GG	GA	GA	AA	GG	AA
Gm07_14500758	Gm07	14500758	84.96	A	0.264957	AA	GG	AG	AA	GG	GG	GG	GG	AG	GG	AG	AG	AA	GG	AG	AG	GG	AG	AG	AG	AG	AG	AA	AA	AG	GG	AG	AA	AA	GG	AG	AG	AA	AA	AG	GG	AA	AG	AA	AG	AG	GG	AA	GG
Gm07_14117170	Gm07	14117170	85.39	G	0.260684	GG	TT	GT	GG	TT	TT	GT	TT	GT	TT	GT	GT	GG	TT	GT	GT	TT	GT	GT	GT	GT	GT	GG	GG	GT	TT	GT	GG	GG	TT	GT	GT	GT	GG	GT	TT	GG	GT	GG	GT	GT	TT	GG	TT
Gm07_13624547	Gm07	13624547	86.04	C	0.260684	CC	TT	CT	CC	TT	TT	CT	TT	CT	TT	CT	CT	CC	TT	CT	CT	TT	CT	CT	CT	CT	CT	CC	CC	CT	TT	CT	CC	CC	TT	CT	CT	CT	CC	CT	TT	CC	CT	CC	CT	CT	TT	CC	TT
Gm07_13542504	Gm07	13542504	86.25	A	0.264957	AA	GG	AG	AA	GG	GG	AG	GG	AG	GG	AG	AG	AA	GG	AG	AG	GG	AG	AG	AG	AG	AG	AA	AA	AG	GG	AG	AA	AA	GG	AG	AG	AG	AA	AG	GG	AA	AG	AA	AG	AG	GG	AA	GG
Gm07_11926335	Gm07	11926335	89.55	A	0.324786	AA	CC	AC	AA	CC	CC	AA	CC	AC	CC	AC	AC	AA	CC	AC	AC	CC	AC	AC	AC	AC	AC	AA	AA	AC	CC	AC	AA	AA	CC	AC	AC	AC	AA	AC	CC	AA	AC	AA	AC	AC	CC	AA	CC
Gm07_12127540	Gm07	12127540	92.85	G	0.260684	GG	AA	GA	GG	AA	AA	GA	AA	GA	AA	GA	GA	GG	AA	GA	GA	AA	GA	GA	GA	GA	GA	GG	GG	GA	AA	GA	GG	GA	AA	GA	GA	GA	GG	GA	AA	GG	GA	GG	GA	GA	AA	GG	AA
Gm07_13053356	Gm07	13053356	93.29	A	0.260684	AA	GG	AG	AA	GG	GG	AG	GG	AG	GG	AG	AG	AA	GG	AG	AG	GG	AG	AG	AG	AG	AG	AA	AA	AG	GG	AG	AA	AG	GG	AA	AG	AG	AA	AG	GG	AA	AG	AA	AG	AG	GG	AA	GG
Gm07_13053371	Gm07	13053371	93.5	T	0.264957	TT	GG	TG	TT	GG	GG	TG	GG	TG	GG	TG	TG	TT	GG	TG	TG	GG	TG	TG	TG	TG	TG	TT	TT	TG	GG	TG	TT	TG	GG	TT	TG	TG	TT	TG	GG	TT	TG	TT	TG	TG	GG	TT	GG
Gm07_13122516	Gm07	13122516	93.94	C	0.260684	CC	TT	CT	CC	TT	TT	CT	TT	CT	TT	CT	CT	CC	TT	CT	CT	TT	CT	CT	CT	CT	CT	CC	CC	CT	TT	CT	CC	CT	TT	CT	CT	CT	CC	CT	TT	CC	CT	CC	CT	CT	TT	CC	TT
Gm07_12127510	Gm07	12127510	94.16	G	0.260684	GG	AA	GA	GG	AA	AA	GA	AA	GA	AA	GA	GA	GG	AA	GA	GA	AA	GA	GA	GA	GA	GA	GG	GG	GA	AA	GA	GG	GA	AA	GA	GA	GA	GG	GA	AA	GG	GA	GG	GA	GA	AA	GG	AA
Gm07_12746007	Gm07	12746007	94.59	A	0.264957	AA	GG	AG	AA	GG	GG	AG	GG	AG	GG	AG	AG	AA	GG	AG	AG	GG	AG	AG	AG	AG	AG	AA	AA	AG	GG	AG	AA	AG	GG	AG	AG	AG	AA	AG	GG	AA	AG	AA	AG	AG	GG	AA	GG
Gm07_11661788	Gm07	11661788	94.81	G	0.264957	GG	AA	GA	GG	AA	AA	GA	AA	GA	AA	GA	GA	GG	AA	GA	GG	AA	GA	GA	GA	GA	GA	GG	GG	GA	AA	GA	GG	GA	AA	GA	GA	GA	GG	GA	AA	GG	GA	GG	GA	GA	AA	GG	AA
Gm07_11584437	Gm07	11584437	95.02	C	0.264957	CC	TT	CT	CC	TT	TT	CT	TT	CT	TT	CT	CT	CC	TT	CT	CC	TT	CT	CT	CT	CT	CT	CC	CC	CT	TT	CT	CC	CT	TT	CT	CT	CT	CC	CT	TT	CC	CT	CC	CT	CT	TT	CC	TT
Gm07_10743669	Gm07	10743669	95.24	G	0.264957	GG	AA	GA	GG	AA	AA	GA	AA	GA	AA	GA	GA	GG	AA	GA	GG	AA	GA	GA	GA	GA	GA	GG	GG	GA	AA	GA	GG	GA	AA	GA	GA	GA	GG	GA	AA	GG	GA	GG	GA	GA	AA	GG	AA
Gm07_10238727	Gm07	10238727	97.42	G	0.269231	GG	AA	GA	GA	AA	AA	GA	AA	GA	AA	GA	GA	GG	AA	GA	GG	AA	GA	GA	GA	GA	GA	GG	GG	GA	AA	GA	GG	GA	AA	GA	GA	GA	GG	GA	AA	GG	GA	GG	GA	GA	AA	GG	AA
Gm07_7379483	Gm07	7379483	116.51	A	0.303419	GG	AA	GG	AG	AG	AA	AG	AA	GG	AA	GG	AA	GG	AG	AG	GG	AG	AG	AG	AG	GG	AG	GG	GG	AG	AA	AG	GG	AA	AA	GG	GG	AG	GG	AG	AA	AG	AG	GG	GG	AG	AA	AG	AA
Gm07_7239006	Gm07	7239006	116.73	G	0.303419	GG	AA	GG	GA	GA	AA	GA	AA	GG	AA	GG	AA	GG	GA	GA	GG	GA	GA	GA	GA	GG	GA	GG	GG	GA	AA	GA	GG	AA	AA	GG	GG	GA	GG	GA	AA	GA	GA	GG	GG	GA	AA	GA	AA
Gm07_7238957	Gm07	7238957	116.94	A	0.307692	AA	GG	AA	AG	AG	GG	AG	GG	AA	GG	AA	GG	AA	AG	AG	AA	AG	AG	AG	AG	AA	AG	AA	AA	AG	GG	AG	AA	GG	GG	AA	AA	AG	AA	AG	GG	AG	AG	AA	AA	AG	GG	AG	GG
Gm07_7031036	Gm07	7031036	118.47	G	0.303419	AA	GA	AA	GA	GA	GG	GA	GG	AA	GG	AA	GG	AA	GA	GA	AA	GA	GA	GA	GA	AA	GA	AA	AA	GA	GG	GA	AA	GG	GG	AA	AA	GA	AA	GA	GG	GA	GA	AA	AA	GA	GG	GA	GA
Gm07_6920350	Gm07	6920350	119.78	A	0.307692	CC	AC	CC	AC	AC	AA	AC	AA	CC	AA	CC	AA	CC	AC	AC	CC	AC	AC	AC	AC	CC	AC	CC	CC	AC	AA	AC	CC	AA	AA	CC	CC	AC	CC	AC	AA	AA	AC	CC	CC	AC	AA	AC	AC
Gm07_6717353	Gm07	6717353	123.08	A	0.32906	AA	AC	AA	AC	AC	CC	AC	AA	AA	CC	AA	CC	AA	AC	AC	AA	AC	AC	AC	AC	AA	AC	AA	AC	AC	CC	AC	AA	CC	AA	AA	AA	AC	AA	AC	CC	CC	AC	AA	AA	AC	CC	AC	AC
Gm07_6772937	Gm07	6772937	123.3	A	0.333333	AA	AT	AA	AT	AT	TT	AT	AA	AA	TT	AA	TT	AA	AT	AT	AA	AT	AT	AT	AT	AA	AT	AA	AT	AT	TT	AT	AA	TT	AA	AA	AA	AT	AA	AT	TT	TT	AT	AA	AA	AT	TT	AT	AT
Gm07_6479204	Gm07	6479204	126.38	T	0.303419	TT	TG	TT	TG	TG	GG	TG	GG	TT	GG	TT	GG	TT	TG	TG	TT	TG	TT	TG	TT	TT	TG	TT	TG	TG	GG	TG	TT	GG	GG	TT	TT	TG	TT	TG	GG	GG	TG	TT	TT	TG	GG	TG	TG
Gm07_6501088	Gm07	6501088	126.81	T	0.299145	CC	TC	CC	TC	TC	TT	TC	TT	CC	TT	CC	TT	CC	TC	TC	CC	TC	CC	TC	CC	CC	TC	CC	TC	TC	TT	TC	CC	TT	TT	CC	CC	TC	CC	TC	TT	TT	TC	CC	CC	TC	TT	TC	TC
Gm07_6364714	Gm07	6364714	127.46	T	0.299145	CC	TC	CC	TC	TC	TT	TC	TT	CC	TT	CC	TT	CC	TC	TC	CC	TC	CC	TC	CC	CC	TC	CC	TC	TC	TT	TC	CC	TT	TT	CC	CC	TC	CC	TC	TT	TT	TC	CC	CC	TC	TT	TC	TC
Gm07_6364687	Gm07	6364687	127.68	T	0.299145	CC	TC	CC	TC	TC	TT	TC	TT	CC	TT	CC	TT	CC	TC	TC	CC	TC	CC	TC	CC	CC	TC	CC	TC	TC	TT	TC	CC	TT	TT	CC	CC	TC	CC	TC	TT	TT	TC	CC	CC	TC	TT	TC	TC
Gm07_6221073	Gm07	6221073	128.55	C	0.303419	TT	CT	TT	CT	CT	CC	CT	CC	TT	CC	TT	CC	TT	CT	CT	TT	CT	TT	CT	TT	TT	CT	TT	CT	CT	CC	CT	TT	CC	CC	TT	TT	CT	TT	CT	CC	CC	CT	TT	TT	CT	CC	CT	CT
Gm07_6083392	Gm07	6083392	129.2	A	0.316239	AA	AT	AA	AT	AT	TT	AT	TT	AA	TT	AA	TT	AA	AT	AT	AA	AT	AA	AT	AA	AA	AT	AA	AT	AT	TT	AT	AA	TT	TT	AA	AA	AT	AA	AT	TT	TT	AT	AA	AA	AT	TT	AT	AT
Gm07_5963599	Gm07	5963599	129.63	A	0.307692	AA	AC	AA	AC	AC	CC	AC	CC	AA	CC	AA	CC	AA	AC	AC	AA	AC	AA	AC	AA	AA	AC	AA	AC	AC	CC	AC	AA	CC	CC	AA	AA	AC	AA	AC	CC	CC	AC	AA	AA	AC	CC	AC	AC
Gm07_3913211	Gm07	3913211	142.8	T	0.290598	TC	CC	CC	TT	TT	TT	TC	TC	TT	TT	TC	TC	CC	TC	TT	CC	TC	CC	TT	CC	CC	TC	CC	TC	TC	TT	TT	CC	TT	TT	CC	CC	TC	CC	TC	TC	TT	TC	CC	TT	TC	TT	TC	TC
Gm07_3913188	Gm07	3913188	143.01	C	0.290598	CG	GG	GG	CC	CC	CC	CG	CG	CC	CC	CG	CG	GG	CG	CC	GG	CG	GG	CC	GG	GG	CG	GG	CG	CG	CC	CC	GG	CC	CC	GG	GG	CG	GG	CG	CG	CC	CG	GG	CC	CG	CC	CG	CG
Gm07_3913243	Gm07	3913243	143.66	G	0.290598	GA	AA	AA	GG	GG	GG	GA	GA	GG	GG	GA	GA	AA	GA	GG	AA	GA	AA	GG	AA	AA	GA	AA	GA	GA	GG	GG	AA	GG	GG	AA	AA	GA	AA	GA	GA	GG	GA	AA	GG	GA	GG	GA	GA
Gm07_4094136	Gm07	4094136	144.1	C	0.286325	CT	TT	TT	CC	CC	CC	CT	CT	CC	CC	CT	CT	TT	CT	CC	TT	CT	TT	CC	TT	TT	CT	TT	CT	CT	CC	CC	TT	CC	CC	TT	TT	CT	TT	CT	CT	CC	CT	TT	CC	CT	CC	CT	CT
Gm07_3932377	Gm07	3932377	144.31	A	0.290598	AG	GG	GG	AA	AA	AA	AG	AG	AA	AA	AG	AG	GG	AG	AA	GG	AG	GG	AA	GG	GG	AG	GG	AG	AG	AA	AA	GG	AA	AA	GG	GG	AG	GG	AG	AG	AA	AG	GG	AA	AG	AA	AG	AG
Gm07_3829145	Gm07	3829145	144.53	T	0.286325	TC	CC	CC	TT	TT	TT	TC	TC	TT	TT	TC	TC	CC	TC	TT	CC	TC	CC	TT	CC	CC	TC	CC	TC	TC	TT	TT	CC	TT	TT	CC	CC	TC	CC	TC	TC	TT	TC	CC	TT	TC	TT	TC	TC
Gm07_3706600	Gm07	3706600	144.96	G	0.290598	GA	AA	AA	GG	GG	GG	GA	GA	GG	GG	GA	GA	AA	GA	GG	AA	GA	AA	GG	AA	AA	GA	AA	GA	GA	GA	GG	AA	GG	GG	AA	AA	GA	AA	GA	GA	GG	GA	AA	GG	GA	GG	GA	GA
Gm07_409355	Gm07	409355	164.83	T	0.24359	TA	TT	TA	AA	AA	AA	TA	TA	AA	TA	TA	TA	TA	TT	AA	TA	AA	TT	TA	TT	TA	TA	TT	AA	TT	TA	AA	TA	AA	AA	TT	TA	TA	TA	TA	TA	AA	TA	TA	AA	AA	AA	TA	TA
Gm08_47684915	Gm08	47684915	0	G	0.277778	GG	AA	GA	GA	GA	AA	GA	GG	GA	AA	GG	AA	GA	GA	GG	GA	GA	AA	GA	GA	AA	GA	GA	AA	GA	GG	AA	GA	AA	GA	GA	GG	AA	GA	AA	GA	GA	AA	AA	GA	GG	GA	GA	AA
Gm08_47684815	Gm08	47684815	0.65	G	0.273504	GG	AA	GA	GA	GA	AA	GA	GG	GA	AA	GG	AA	GA	GA	GG	GA	GA	AA	GA	GA	AA	GA	GA	AA	GA	GG	AA	GA	AA	GA	GA	GA	AA	GA	AA	GA	GA	AA	AA	GA	GG	GA	GA	AA
Gm08_47038870	Gm08	47038870	5.79	A	0.269231	AA	TT	AT	AT	AT	TT	AT	AA	AT	TT	AA	TT	AT	AT	AT	AT	AT	TT	AT	AT	TT	AT	AT	TT	AT	AA	TT	AT	TT	AT	AT	AT	TT	AT	AT	AT	AT	TT	TT	AT	AA	AT	AT	TT
Gm08_46938408	Gm08	46938408	6.88	G	0.264957	GG	TT	GT	GT	GT	TT	GG	GG	GT	TT	GG	TT	GT	GT	GT	GT	GT	TT	GT	GT	TT	GT	GT	TT	GT	GG	TT	GT	TT	GT	GT	GT	TT	GT	GT	GT	GT	TT	TT	GT	GG	GT	GT	TT
Gm08_46938370	Gm08	46938370	7.75	C	0.260684	CC	AA	CA	CA	CA	AA	CA	CC	CA	AA	CC	AA	CA	CA	CA	CA	CA	AA	CA	CA	AA	CA	CA	AA	CA	CC	AA	CA	AA	CA	CA	CA	AA	CA	CA	CA	CA	AA	AA	CA	CC	CA	CA	AA
Gm08_46877119	Gm08	46877119	9.73	T	0.25641	TT	CC	TC	TC	TC	CC	TC	TT	TC	CC	TT	CC	TC	TC	TC	TC	TC	TC	TC	TC	CC	TC	TC	CC	TC	TT	CC	TC	CC	TC	TC	TC	CC	TC	TC	TC	TC	CC	CC	TC	TT	TC	TC	CC
Gm08_46504124	Gm08	46504124	11.04	A	0.269231	CC	AA	AC	AC	AC	AA	AA	CC	AC	AA	CC	AA	AC	AC	AC	AC	AC	AC	AC	AC	AA	AC	AC	AA	AC	CC	AA	AC	AA	AC	AC	AC	AA	AC	AC	AC	AC	AA	AA	AC	CC	AC	AC	AA
Gm08_46191870	Gm08	46191870	13.68	G	0.264957	GG	CC	GC	GC	GC	CC	CC	GG	GC	CC	GG	CC	GC	GC	GC	GC	GC	GC	GC	GC	CC	GC	GC	CC	GG	GG	CC	GC	CC	GC	GC	GC	CC	GC	GC	GC	GC	GC	CC	GC	GG	GC	GC	CC
Gm08_46071470	Gm08	46071470	15.42	A	0.260684	AA	GG	AG	AG	AG	GG	GG	AA	AA	GG	AA	GG	AG	AG	AG	AG	AG	AG	AG	AG	GG	AG	AG	GG	AA	AA	GG	AG	GG	AG	AG	AG	GG	AG	AG	AG	AG	AG	GG	AG	AA	AG	AG	GG
Gm08_44621200	Gm08	44621200	33.88	T	0.32906	TT	CC	TC	TT	TT	CC	CC	TT	TT	CC	TC	CC	TT	TC	CC	TC	TC	TT	CC	CC	CC	TC	TT	CC	TT	TC	CC	TT	CC	CC	TT	CC	TC	CC	TC	CC	CC	TC	CC	TC	TT	TC	TC	TC
Gm08_43900314	Gm08	43900314	40.84	C	0.324786	TT	CC	CT	TT	TT	CC	CC	TT	TT	CC	CT	CC	CT	CT	CC	CT	CT	TT	CC	CC	CT	CT	TT	CC	CT	CT	CC	TT	CC	CC	TT	CC	CT	CC	CT	CC	CC	CT	CC	CT	CT	CT	CC	CT
Gm08_43820794	Gm08	43820794	41.28	C	0.333333	AA	CC	CA	AA	AA	CC	CC	AA	AA	CC	CA	CC	CA	CA	CC	CA	CA	AA	CC	CC	CA	CA	AA	CC	CA	CA	CC	AA	CC	CC	AA	CC	CA	CC	CA	CC	CC	CA	CC	CA	CA	CA	CC	CA
Gm08_43726210	Gm08	43726210	42.15	T	0.324786	GG	TT	TG	GG	GG	TT	TT	GG	GG	TT	TG	TT	TG	TG	TT	TG	TG	GG	TT	TT	TG	TG	GG	TT	TG	TG	TT	GG	TT	TT	GG	TT	TG	TT	TG	TT	TT	TG	TT	TG	TG	TG	TT	TG
Gm08_43631508	Gm08	43631508	42.36	A	0.320513	AA	GG	AG	AA	AA	GG	GG	AA	AA	GG	AG	GG	AG	AG	GG	AG	AG	AA	GG	GG	AG	AG	AA	GG	AG	AG	GG	AA	GG	GG	AA	GG	AG	GG	AG	GG	GG	AG	GG	AG	AG	AG	GG	AG
Gm08_43568663	Gm08	43568663	43.45	G	0.320513	GG	TT	GT	GG	GG	TT	TT	GG	GG	TT	GT	TT	GT	GT	TT	GT	GT	GG	TT	TT	GT	GT	GG	TT	GT	GT	TT	GG	TT	TT	GG	TT	GT	TT	GT	TT	TT	GT	TT	GT	GT	GT	TT	GT
Gm08_40881649	Gm08	40881649	59.82	A	0.311966	AA	GG	AG	AG	AA	AG	GG	AG	AA	AG	AG	GG	AG	AG	GG	AG	AG	AA	AG	GG	AA	AG	AG	GG	AG	AG	GG	AA	GG	GG	AA	AG	AG	GG	AG	GG	GG	GG	GG	AA	AG	GG	GG	AA
Gm08_40761984	Gm08	40761984	60.25	G	0.311966	GG	CC	GC	GC	GG	GC	CC	GC	GG	GC	GC	CC	GC	GG	CC	GC	GC	GG	GC	CC	GG	GC	GC	CC	GC	GC	CC	GG	CC	CC	GG	GC	GC	CC	GC	CC	CC	CC	CC	GG	GC	CC	CC	GG
Gm08_40781321	Gm08	40781321	60.47	G	0.311966	GG	AA	GA	GA	GG	GA	AA	GA	GG	GA	GA	AA	GA	GA	AA	GA	GA	GG	GA	AA	GG	GA	GA	AA	GA	GA	AA	GG	AA	AA	GG	GA	GA	AA	GA	AA	AA	AA	AA	GG	GA	AA	AA	GG
Gm08_39517547	Gm08	39517547	69.12	A	0.277778	AA	GG	AG	AG	AA	AG	GG	AG	AA	AG	AG	AG	AG	AG	GG	AG	AG	AA	AG	AG	AA	AG	AG	GG	AG	AG	GG	AA	AG	AG	AA	AG	AG	AG	AG	GG	GG	GG	AG	AA	AG	GG	GG	AA
Gm08_38559225	Gm08	38559225	70.65	T	0.277778	TT	CC	TC	TC	TT	TC	CC	TC	TT	TC	TC	TC	TC	TC	CC	TC	TC	TT	TC	TC	TT	TC	TC	CC	TC	TC	CC	TT	TC	TC	TT	TC	TC	TC	TC	CC	CC	CC	TC	TT	TC	CC	CC	TT
Gm08_37154700	Gm08	37154700	70.86	G	0.273504	GG	AA	GA	GA	GG	GA	AA	GA	GG	GA	GA	GA	GA	GA	AA	GA	GA	GG	GA	GA	GG	GA	GA	AA	GA	GA	AA	GG	GA	GA	GG	GA	GA	GA	GA	AA	AA	AA	GA	GG	GA	AA	AA	GG
Gm08_37367097	Gm08	37367097	71.74	A	0.277778	AA	GG	AG	AG	AA	AG	GG	AG	AA	AG	AG	AG	AG	AG	GG	AG	AG	AA	AG	AG	AA	AG	AG	GG	AG	AG	GG	AA	AG	AG	AA	AG	AG	AG	AG	GG	GG	GG	AG	AA	AG	GG	GG	AA
Gm08_36692913	Gm08	36692913	73.05	G	0.273504	GG	AA	GA	GA	GG	GA	AA	GA	GG	GA	GA	GA	GA	GA	AA	GA	GA	GG	GA	GA	GG	GA	GA	AA	GA	GA	AA	GG	GA	GA	GG	GA	GA	GA	GA	AA	AA	AA	GA	GG	GA	AA	AA	GG
Gm08_36467379	Gm08	36467379	73.26	A	0.269231	AA	CC	AC	AC	AA	AC	CC	AC	AA	AC	AC	AC	AC	AC	CC	AC	AC	AA	AC	AC	AA	AC	AC	CC	AC	AC	CC	AA	AC	AC	AA	AC	AC	AC	AC	CC	CC	CC	AC	AA	AC	CC	CC	AA
Gm08_35909316	Gm08	35909316	73.7	A	0.277778	AA	GG	AG	AG	AA	AG	GG	AG	AA	AG	AG	AG	AG	AG	GG	AG	AG	AA	AG	AG	AA	AG	AG	GG	AG	AG	GG	AA	AG	AG	AA	AG	AG	AG	AG	GG	GG	GG	AG	AA	AG	GG	GG	AA
Gm08_35909299	Gm08	35909299	73.91	G	0.273504	GG	TT	GT	GT	GG	GT	TT	GT	GG	GT	GT	GT	GT	GT	TT	GT	GT	GG	GT	GT	GG	GT	GT	TT	GT	GT	TT	GG	GT	GT	GG	GT	GT	GT	GT	TT	TT	TT	GT	GG	GT	TT	TT	GG
Gm08_35647138	Gm08	35647138	74.34	G	0.273504	GG	AA	GA	GA	GG	GA	AA	GA	GG	GA	GA	GA	GA	GA	AA	GA	GA	GG	GA	GA	GG	AA	GA	AA	GA	GA	AA	GG	GA	GA	GG	GA	GA	GA	GA	AA	AA	AA	GA	GG	GA	AA	AA	GG
Gm08_35647187	Gm08	35647187	74.56	C	0.277778	CC	TT	CT	CT	CC	CT	TT	CT	CC	CT	CT	CT	CT	CT	TT	CT	CT	CC	CT	CT	CC	TT	CT	TT	CT	CT	TT	CC	CT	CT	CC	CT	CT	CT	CT	TT	TT	TT	CT	CC	CT	TT	TT	CC
Gm08_34983713	Gm08	34983713	75.21	G	0.282051	GG	AA	GA	GA	GG	GA	AA	GA	GG	GA	GA	GA	GA	GA	AA	GA	GA	GG	GA	GA	GG	AA	GA	AA	GA	GA	AA	GG	GA	GA	GG	GA	GA	GA	GA	AA	AA	AA	GA	GG	GA	AA	AA	GG
Gm08_35099917	Gm08	35099917	76.09	T	0.290598	TT	CC	TC	TC	TT	TC	CC	TC	TT	TC	TC	TC	TC	TC	CC	TC	TC	TT	TC	TC	TT	CC	TC	CC	TC	TC	CC	TT	TC	TC	TT	TC	TC	TC	TC	CC	CC	CC	TC	TT	TC	CC	CC	TT
Gm08_35099899	Gm08	35099899	76.3	A	0.286325	AA	CC	AC	AC	AA	AC	CC	AC	AA	AC	AC	AC	AC	AC	CC	AC	AC	AA	AC	AC	AA	CC	AC	CC	AC	AC	CC	AA	AC	AC	AA	AC	AC	AC	AC	CC	CC	CC	AC	AA	AC	CC	CC	AA
Gm08_35099928	Gm08	35099928	76.52	C	0.282051	CC	TT	CT	CT	CC	CT	TT	CT	CC	CT	CT	CT	CT	CT	TT	CT	CT	CC	CT	CT	CC	TT	CT	TT	CT	CT	TT	CC	CT	CT	CC	CT	CT	CT	CT	TT	TT	TT	CT	CC	CT	TT	TT	CC
Gm08_29841527	Gm08	29841527	76.74	G	0.277778	GG	AA	GA	GA	GG	GA	AA	GA	GG	GA	GA	GA	GA	GA	AA	GA	GA	GG	GA	GA	GG	AA	GA	AA	GA	GA	AA	GG	GA	GA	GG	GA	GA	GA	GA	AA	AA	AA	GA	GG	GA	AA	AA	GG
Gm08_22947995	Gm08	22947995	79.14	A	0.282051	AA	GG	AG	AG	AA	AA	GG	AG	AA	AG	AG	AG	AG	AG	GG	AG	AG	AA	AG	AG	AA	GG	AG	GG	AA	AG	GG	AA	AG	AG	AA	AG	AG	AG	AG	GG	GG	GG	AG	AA	AG	GG	GG	AA
Gm08_22656671	Gm08	22656671	80	T	0.277778	TT	AA	TA	TA	TT	TT	AA	TA	TT	TA	TA	TA	TA	TA	AA	TA	TA	TT	TA	TA	TT	AA	TA	AA	TT	TA	AA	TT	TA	TA	TT	TA	TA	TA	TA	AA	AA	AA	TA	TT	TA	AA	AA	TT
Gm08_22475186	Gm08	22475186	80.22	T	0.273504	TT	CC	TC	TC	TT	TT	CC	TC	TT	TC	TC	TC	TC	TC	CC	TC	TC	TT	TC	TC	TT	CC	TC	CC	TT	TC	CC	TT	TC	TC	TT	TC	TC	TC	TC	CC	CC	CC	TC	TT	TC	CC	CC	TT
Gm08_22268297	Gm08	22268297	80.44	C	0.277778	CC	TT	CT	CT	CC	CC	TT	CT	CC	CT	CT	CT	CT	CT	TT	CT	CT	CC	CT	CT	CC	TT	CT	TT	CC	CT	TT	CC	CT	CT	CC	CT	CT	CT	CT	TT	TT	TT	CT	CC	CT	TT	TT	CC
Gm08_21128290	Gm08	21128290	88.12	A	0.316239	AA	CC	AC	AC	AA	AA	CC	AC	AA	AC	AC	CC	AC	AC	CC	AC	AC	AA	AC	CC	AA	AC	AC	CC	AA	AC	AC	AA	AC	CC	AA	AC	AC	CC	AC	CC	CC	CC	CC	AA	CC	CC	CC	AA
Gm08_20805867	Gm08	20805867	88.34	T	0.311966	TT	CC	TC	TC	TT	TT	CC	TC	TT	TC	TC	CC	TC	TC	CC	TC	TC	TT	TC	CC	TT	TC	TC	CC	TT	TC	TC	TT	TC	CC	TT	TC	TC	CC	TC	CC	CC	CC	CC	TT	CC	CC	CC	TT
Gm08_19368964	Gm08	19368964	92.76	C	0.299145	CC	TT	CC	CT	CC	CC	TT	CC	CC	CT	CT	TT	CT	CT	TT	CT	CT	CC	CT	TT	CC	CT	CT	TT	CC	CT	CT	CC	CT	TT	CC	CT	CT	TT	CT	TT	TT	CT	TT	CC	TT	TT	TT	CC
Gm08_19368918	Gm08	19368918	93.63	G	0.299145	GG	CC	GG	GC	GG	GG	CC	GG	GG	GC	GC	CC	GC	GC	CC	GC	GC	GG	GC	CC	GG	GC	GC	CC	GG	GC	GC	GG	GC	CC	GG	GC	GC	CC	GC	CC	CC	GC	CC	GG	CC	CC	CC	GG
Gm08_19368957	Gm08	19368957	94.71	A	0.299145	AA	GG	AA	AG	AA	AA	GG	AA	AA	AG	AG	GG	AG	AG	GG	AG	AG	AA	AG	GG	AA	AG	AG	GG	AA	AG	AG	AA	AG	GG	AA	AG	AG	GG	AG	GG	GG	AG	GG	AA	GG	GG	GG	AA
Gm08_19368997	Gm08	19368997	95.58	G	0.299145	GG	CC	GG	GC	GG	GG	CC	GG	GG	GC	GC	CC	GC	GC	CC	GC	GC	GG	GC	CC	GG	GC	GC	CC	GG	GC	GC	GG	GC	CC	GG	GC	GC	CC	GC	CC	CC	GC	CC	GG	CC	CC	CC	GG
Gm08_19369002	Gm08	19369002	95.8	C	0.299145	CC	GG	CC	CG	CC	CC	GG	CC	CC	CG	CG	GG	CG	CG	GG	CG	CG	CC	CG	GG	CC	CG	CG	GG	CC	CG	CG	CC	CG	GG	CC	CG	CG	GG	CG	GG	GG	CG	GG	CC	GG	GG	GG	CC
Gm08_19295667	Gm08	19295667	96.45	G	0.299145	GG	AA	GG	GA	GG	GG	AA	GG	GG	GA	GA	AA	GA	GA	AA	GA	GA	GG	GA	AA	GG	GA	GA	AA	GG	GA	GA	GG	GA	AA	GG	GA	GA	AA	GA	AA	AA	GA	AA	GA	AA	AA	AA	GG
Gm08_19969721	Gm08	19969721	96.88	G	0.303419	GG	AA	GG	GA	GG	GG	AA	GG	GG	GA	GA	AA	GA	GA	AA	GA	GA	GG	GA	AA	GG	GA	GA	AA	GG	GA	GA	GG	GA	AA	GG	GA	GA	AA	GA	AA	AA	GA	AA	GA	AA	AA	AA	GG
Gm08_20249809	Gm08	20249809	97.1	G	0.303419	GG	AA	GG	GA	GG	GG	AA	GG	GG	GA	GA	AA	GA	GA	AA	GA	GA	GG	GA	AA	GG	GA	GA	AA	GG	GA	GA	GG	GA	AA	GG	GA	GA	AA	GA	AA	AA	GA	AA	GA	AA	AA	AA	GG
Gm08_19136988	Gm08	19136988	97.75	C	0.303419	CC	TT	CC	CT	CC	CC	TT	CC	CC	CT	CT	TT	CT	CT	TT	CT	CC	CC	CT	TT	CC	CT	CT	TT	CC	CT	CT	CC	CT	TT	CC	CT	CT	TT	CT	TT	TT	CT	TT	CT	TT	TT	TT	CC
Gm08_18678222	Gm08	18678222	99.27	A	0.320513	AA	GG	AA	AG	AA	AA	GG	AA	AA	AG	AG	GG	AG	AG	GG	AG	AA	AA	AG	GG	AA	AG	AG	GG	AA	AG	AG	AA	AG	GG	AA	AG	AG	GG	AG	GG	GG	AG	GG	AG	GG	GG	GG	AA
Gm08_18249138	Gm08	18249138	100.57	A	0.307692	AA	GG	AA	AA	AA	AA	GG	AA	AA	AG	AG	GG	AG	AG	GG	AG	AA	AA	AG	GG	AA	AG	AG	GG	AA	AG	AG	AA	AG	GG	AA	AG	AG	GG	AG	GG	GG	AG	GG	AG	GG	GG	GG	AA
Gm08_15125168	Gm08	15125168	122.14	C	0.333333	CT	CC	TT	TT	CC	TT	CC	TT	CT	CC	CC	CC	CT	CT	CC	CT	TT	TT	CC	CC	TT	CT	CC	CC	TT	TT	CT	CT	CT	CC	TT	CT	CT	CC	CT	CC	CC	CT	CC	CT	TT	CC	CC	CT
Gm08_14785064	Gm08	14785064	129.61	C	0.264957	CT	CC	TT	TT	CC	TT	CC	TT	CT	CT	CC	CT	CT	CT	CT	CT	TT	TT	CC	CT	TT	CT	CC	CC	TT	TT	CT	CT	CT	CT	TT	CT	CT	CT	CT	CC	CC	CT	CC	CT	TT	CC	CT	CT
Gm08_14785053	Gm08	14785053	129.82	C	0.260684	CT	CC	TT	TT	CC	TT	CC	TT	CT	CT	CC	CT	CT	CT	CT	CT	TT	TT	CC	CT	TT	CT	CC	CC	TT	TT	CT	CT	CT	CT	TT	CT	CT	CT	CT	CC	CC	CT	CC	CT	TT	CC	CT	CT
Gm08_14629173	Gm08	14629173	133.58	C	0.269231	CT	CC	TT	TT	CC	TT	CC	TT	CT	CT	CC	CT	CT	CT	CT	CT	TT	TT	CC	CT	TT	CT	CC	CC	TT	TT	CT	CT	CT	CT	TT	CT	CT	CT	CT	CC	CC	CT	CC	CC	TT	CC	CT	CT
Gm08_10347741	Gm08	10347741	158.66	G	0.260684	GA	GA	GA	GA	AA	GG	GA	GA	GA	GA	AA	GA	GA	GA	GA	GA	GG	GG	AA	GG	GG	GA	GA	GA	GG	GG	AA	AA	GG	GG	GA	GA	GG	GA	GA	AA	GA	GA	GA	GA	GG	GA	GA	AA
Gm08_10347736	Gm08	10347736	162.85	A	0.320513	AG	AG	AG	AG	GG	AA	AG	AG	AG	AG	GG	GG	AG	AG	GG	AG	AA	AA	GG	GG	AA	AG	AG	AG	AA	AA	GG	GG	AA	AA	AG	AG	AA	GG	AG	GG	GG	AG	GG	AG	AA	AG	AG	GG
Gm08_10112205	Gm08	10112205	165.26	T	0.311966	TC	TC	TC	TC	CC	TT	TC	TC	TC	TC	CC	CC	CC	TC	CC	TC	TT	TT	CC	CC	TT	TC	TC	TC	TC	TT	CC	CC	TT	TT	TC	TC	TT	CC	TC	CC	CC	TC	CC	CC	TT	TC	TC	CC
Gm08_9599939	Gm08	9599939	167.22	G	0.303419	GC	GC	GC	GC	CC	GG	GG	GC	GC	GC	CC	CC	CC	GC	CC	GC	GG	GG	CC	CC	GG	GC	GC	GC	GC	GC	CC	CC	GG	GG	GC	GC	GG	CC	GC	CC	CC	GC	CC	CC	GG	GC	GC	CC
Gm08_9599966	Gm08	9599966	167.44	A	0.303419	AG	AG	AG	AG	GG	AA	AG	AG	AG	AG	GG	GG	GG	AG	GG	AG	AA	AA	GG	GG	AA	AG	AG	AG	AG	AG	GG	GG	AA	AA	AG	AG	AA	GG	AG	GG	GG	AG	GG	GG	AA	AG	AG	GG
Gm08_9696749	Gm08	9696749	167.66	A	0.303419	AT	AT	AT	AT	TT	AA	AT	AT	AT	AT	TT	TT	TT	AT	TT	AT	AA	AA	TT	TT	AA	AT	AT	AT	AT	AA	TT	TT	AA	AA	AT	AT	AA	TT	AT	TT	TT	AT	TT	TT	AA	AT	AT	TT
Gm08_9764688	Gm08	9764688	171.87	T	0.25641	TC	TC	TC	TC	CC	TT	TC	TC	TC	TC	CC	TC	CC	TC	TC	TC	TT	TT	CC	TT	TT	TC	TC	TC	TC	TT	CC	CC	TT	TT	TC	TC	TT	TC	TC	CC	TC	TC	TC	CC	TT	TC	TC	CC
Gm08_7758483	Gm08	7758483	179.82	G	0.260684	GA	AA	GA	GA	GA	GG	GA	GA	GA	GA	AA	GA	AA	GA	GA	GA	GG	GG	AA	GG	GG	GA	GA	GA	GA	AA	AA	AA	GG	GG	GA	GA	GG	GA	GA	AA	GA	GA	GA	AA	GG	GA	GA	AA
Gm08_7534765	Gm08	7534765	180.91	C	0.247863	CG	GG	CG	CG	CG	CC	CG	CG	CG	CG	GG	CG	GG	CG	CG	CG	CC	CC	GG	CC	CC	CG	CG	CG	CG	GG	GG	GG	CC	CC	CG	CG	CC	CG	CG	GG	CG	CG	CG	GG	CC	CG	CG	GG
Gm08_8318536	Gm08	8318536	184.01	A	0.25641	AG	AG	AG	AG	AA	GG	AG	AG	AG	AG	AA	AG	AA	AG	AG	AG	GG	GG	AA	GG	GG	AG	AG	AG	AG	AG	AA	AA	GG	GG	AG	AG	GG	AG	AG	AA	AG	AG	AA	AA	GG	AG	AG	AA
Gm08_8318532	Gm08	8318532	187.55	T	0.311966	TC	TC	TC	TC	TT	CC	TC	TC	TC	TC	TT	TT	TT	TC	TT	TC	CC	CC	TT	TT	CC	TC	TC	TC	TC	TC	TT	TT	CC	CC	TC	TC	CC	TT	TC	TT	TT	TC	TT	TT	CC	TC	TC	TT
Gm08_8318408	Gm08	8318408	188.21	T	0.299145	TC	TC	TC	TC	TT	CC	TC	TC	TC	TC	TT	TT	TT	TC	TT	TC	CC	CC	TT	TT	CC	TC	TC	TC	TC	TC	TT	TT	CC	CC	TC	TC	CC	TT	TC	TT	TT	TC	TT	TT	CC	TC	TC	TT
Gm08_8318482	Gm08	8318482	188.42	T	0.303419	TC	TC	TC	TC	TT	CC	TC	TC	TC	TC	TT	TT	TT	TC	TT	TC	CC	CC	TT	TT	CC	TC	TC	TC	TC	TC	TT	TT	CC	CC	TC	TC	CC	TT	TC	TT	TT	TC	TT	TT	CC	TC	TC	TT
Gm08_8047965	Gm08	8047965	189.08	A	0.303419	AC	AC	AC	AC	AA	CC	AC	AC	AC	AC	AA	AA	AA	AC	AA	AC	CC	CC	AA	AA	CC	AC	AC	AC	AC	AA	AA	AA	CC	CC	AC	AC	CC	AA	AC	AA	AA	AC	AA	AA	CC	AC	AC	AA
Gm08_7850361	Gm08	7850361	189.51	T	0.299145	TC	TC	TC	TC	TT	CC	TC	TC	TC	TC	TT	TT	TT	TC	TT	TC	CC	CC	TT	TT	CC	TC	TC	TC	TC	TT	TT	TT	CC	CC	TC	TC	CC	TT	TC	TT	TT	TC	TT	TT	CC	TC	TC	TT
Gm08_7758502	Gm08	7758502	190.38	G	0.303419	GA	GG	GA	GA	GA	AA	GA	GA	GA	GA	GG	GG	GG	GA	GG	GA	AA	AA	GG	GG	AA	GA	GA	GA	GA	GG	GG	GG	AA	AA	GA	GA	AA	GG	GA	GG	GG	GA	GG	GG	AA	GA	GA	GG
Gm08_7605010	Gm08	7605010	190.81	G	0.307692	GA	GG	GA	GA	GA	AA	GA	GA	GA	GA	GG	GG	GG	GA	GG	GA	AA	AA	GG	GG	AA	GA	GA	GA	GA	GG	GG	GG	AA	AA	GA	GA	AA	GG	GA	GG	GG	GA	GG	GG	AA	GA	GA	GG
Gm08_7604982	Gm08	7604982	191.03	T	0.311966	TC	TT	TC	TC	TC	CC	TC	TC	TC	TC	TT	TT	TT	TC	TT	TC	CC	CC	TT	TT	CC	TC	TC	TC	TC	TT	TT	TT	CC	CC	TC	TC	CC	TT	TC	TT	TT	TC	TT	TT	CC	TC	TC	TT
Gm08_7534772	Gm08	7534772	191.46	C	0.311966	CT	CC	CT	CT	CT	TT	CT	CT	CT	CT	CC	CC	CC	CT	CC	CT	TT	TT	CC	CC	TT	CT	CT	CT	CT	CC	CC	CC	TT	TT	CT	CT	TT	CC	CT	CC	CC	CT	CC	CC	TT	CT	CT	CC
Gm08_7325693	Gm08	7325693	191.68	T	0.316239	TC	TT	TC	TC	TC	CC	TC	TC	TC	TC	TT	TT	TT	TC	TT	TC	CC	CC	TT	TT	CC	TC	TC	TC	TC	TT	TT	TT	CC	CC	TC	TC	CC	TT	TC	TT	TT	TC	TT	TT	CC	TC	TC	TT
Gm08_7325671	Gm08	7325671	191.89	C	0.320513	CT	CC	CT	CT	CT	TT	CT	CT	CT	CT	CC	CC	CC	CT	CC	CT	TT	TT	CC	CC	TT	CT	CT	CT	CT	CC	CC	CC	TT	TT	CT	CT	TT	CC	CT	CC	CC	CT	CC	CC	TT	CT	CT	CC
Gm08_7325665	Gm08	7325665	192.11	A	0.324786	AG	AA	AG	AG	AG	GG	AG	AG	AG	AG	AA	AA	AA	AG	AA	AG	GG	GG	AA	AA	GG	AG	AG	AG	AG	AA	AA	AA	GG	GG	AG	AG	GG	AA	AG	AA	AA	AG	AA	AA	GG	AG	AG	AA
Gm08_7325652	Gm08	7325652	192.98	A	0.333333	AC	AA	AC	AC	AC	CC	AC	AC	AC	AC	AA	AA	AA	AC	AA	AC	CC	CC	AA	AA	CC	AC	AC	AC	AC	AA	AA	AA	CC	CC	AC	AC	CC	AA	AC	AA	AA	AC	AA	AA	CC	AC	AC	AA
Gm08_5043915	Gm08	5043915	207.13	A	0.32906	AG	AG	AG	AG	AG	AA	GG	AG	AG	AG	GG	GG	AG	AG	GG	GG	AA	AA	GG	GG	AA	AG	AG	AG	AG	GG	AG	GG	AA	AA	AA	AG	AA	GG	AG	GG	GG	AG	GG	GG	AA	AG	AG	GG
Gm08_3661831	Gm08	3661831	218.3	G	0.324786	GA	GG	GA	GA	GA	AA	GG	GA	GG	GG	GG	GG	GA	GA	GA	GG	GA	AA	GG	GG	AA	GA	AA	GA	GA	GG	AA	GG	GA	AA	AA	GA	GA	GA	GA	GG	AA	GA	GA	GA	AA	GA	GA	GG
Gm08_3041334	Gm08	3041334	220.95	T	0.333333	TC	CC	TC	TC	TC	TT	CC	CC	CC	CC	CC	CC	TC	TC	TC	CC	CC	TT	CC	CC	TT	TC	TT	TC	TC	CC	TT	CC	TC	TT	TT	TC	TC	TC	TC	CC	TT	TC	TC	TT	TT	TC	TC	CC
Gm08_2788359	Gm08	2788359	221.6	G	0.32906	GT	TT	GT	GT	GT	GG	TT	TT	TT	TT	TT	TT	GT	GT	GT	TT	TT	GG	TT	TT	GG	GT	GG	GT	GT	TT	GG	TT	GT	GG	GG	GT	GT	GT	GT	TT	GG	GT	GT	GG	GG	GT	GT	TT
Gm08_548870	Gm08	548870	236.34	G	0.286325	GT	GG	GT	GT	GT	GT	GT	GG	GG	GG	GG	GG	TT	GT	GT	GG	GG	TT	GG	GG	TT	GT	TT	GT	GT	GG	TT	GG	GT	TT	TT	GG	GG	TT	GT	TT	TT	GT	GT	TT	TT	GT	GT	GT
Gm09_918878	Gm09	918878	0	T	0.290598	TT	CC	TC	TC	TT	TC	TC	TT	TC	TC	TC	CC	TC	TT	TT	TT	TT	CC	TT	TC	TC	TT	TT	TC	CC	TC	TC	TC	TC	TC	CC	TC	CC	TC	TC	TT	TT	CC	TC	TC	CC	TT	CC	TT
Gm09_3775760	Gm09	3775760	31.88	G	0.282051	GA	GA	AA	AA	GA	GA	GA	AA	GA	AA	AA	GG	GA	GA	AA	AA	AA	GG	GA	GA	GA	GA	AA	AA	GG	AA	AA	GA	GA	GA	GG	GG	AA	GA	GA	GG	GA	GA	GA	GA	GG	GG	GG	AA
Gm09_3850898	Gm09	3850898	32.32	T	0.277778	TG	TG	GG	GG	TG	TG	TG	GG	TG	GG	GG	TT	TG	TG	GG	TG	GG	TT	TG	TG	TG	TG	GG	GG	TT	GG	GG	TG	TG	TG	TT	TT	GG	TG	TG	TT	TG	TG	TG	TG	TT	TT	TT	GG
Gm09_4280063	Gm09	4280063	35.62	T	0.269231	TC	TC	CC	CC	TC	TT	TC	TC	CC	CC	TC	TT	TC	TC	CC	TC	CC	TT	TC	TC	TC	TC	CC	CC	TT	TC	CC	TC	TC	TC	TT	TT	CC	TC	TC	TT	TC	TC	TC	CC	TT	TT	TT	CC
Gm09_4155149	Gm09	4155149	36.06	C	0.264957	CT	CT	TT	TT	CT	CC	CT	CT	TT	TT	CT	CC	CT	CT	TT	CT	TT	CC	CT	CT	CT	CT	TT	TT	CC	CT	TT	CT	CT	CT	CC	CC	TT	CT	CT	CC	CT	CT	CT	TT	CC	CC	CC	TT
Gm09_4422554	Gm09	4422554	36.92	A	0.260684	AC	AC	CC	CC	AC	AA	AC	AC	CC	CC	AC	AA	AC	AC	CC	AC	CC	AA	AC	AC	AC	AC	CC	CC	AA	AC	CC	AC	AC	AC	AA	AA	CC	AC	AC	AA	AC	AC	AC	CC	AA	AA	AA	CC
Gm09_4422652	Gm09	4422652	37.36	C	0.264957	CG	CG	GG	GG	CG	CC	CG	CG	GG	GG	CG	CC	CG	CG	GG	CG	GG	CC	CG	CG	CG	CG	GG	GG	CC	CG	GG	CG	CG	CG	CC	CC	GG	CG	CG	CC	CG	CG	CG	GG	CC	CC	CC	GG
Gm09_4499600	Gm09	4499600	38.67	G	0.264957	GA	GA	AA	AA	GA	GG	GA	GA	AA	AA	GA	GG	GA	GA	AA	GA	AA	GG	GA	GA	GA	GA	AA	AA	GG	GA	AA	GA	GA	GG	GG	GG	AA	GA	GA	GG	GA	GA	GA	AA	GG	GG	GG	AA
Gm09_5086545	Gm09	5086545	42.88	C	0.260684	CC	CT	CT	TT	CT	CC	CT	CT	TT	TT	CT	CC	TT	CT	TT	CT	TT	CC	CT	CT	CT	CT	TT	TT	CC	CT	TT	CT	CT	CC	CC	CC	TT	CT	CT	CC	CT	CT	CT	TT	CC	CC	CC	TT
Gm09_5376956	Gm09	5376956	43.75	G	0.25641	GG	GA	GA	AA	GA	GG	GA	GA	AA	AA	GA	GG	AA	GA	AA	GA	AA	GG	GA	GA	GA	GA	GA	AA	GG	GA	AA	GA	GA	GG	GG	GG	AA	GA	GA	GG	GA	GA	GA	AA	GG	GG	GG	AA
Gm09_5483854	Gm09	5483854	45.27	A	0.260684	AA	AG	AG	GG	AG	AA	AG	AG	GG	GG	AG	AA	GG	AG	GG	AG	GG	AA	AG	AG	AG	AG	AG	GG	AA	AG	GG	AG	AG	AA	AA	AA	GG	AG	AG	AA	AG	AG	AG	GG	AA	AA	AA	GG
Gm09_5483894	Gm09	5483894	46.14	T	0.260684	TT	TC	TC	CC	TC	TT	TC	TC	CC	CC	TC	TT	CC	TC	CC	TC	CC	TT	TC	TC	TC	TC	TC	CC	TT	TC	CC	TC	TC	TT	TT	TT	CC	TC	TC	TT	TC	TC	TC	CC	TT	TT	TT	CC
Gm09_5894618	Gm09	5894618	47.45	G	0.260684	GG	GA	GA	AA	GA	GG	GA	GA	AA	AA	GA	GG	AA	GA	AA	GA	AA	GG	GA	GA	GA	GA	GA	AA	GG	GA	AA	GA	GA	GG	GG	GA	AA	GA	GA	GG	GA	GA	GA	AA	GG	GG	GG	AA
Gm09_6075066	Gm09	6075066	48.32	C	0.264957	CC	CT	CT	TT	CT	CC	CT	CT	TT	TT	CT	CC	TT	CT	TT	CT	TT	CC	CT	CT	CT	CT	CT	TT	CC	CT	TT	CT	CT	CC	CC	CT	TT	CT	CT	CC	CT	CT	CT	TT	CC	CC	CC	TT
Gm09_5990494	Gm09	5990494	48.53	C	0.264957	CC	CA	CA	AA	CA	CC	CA	CA	AA	AA	CA	CC	AA	CA	AA	CA	AA	CC	CA	CA	CA	CA	CA	AA	CC	CA	AA	CA	CA	CC	CC	CA	AA	CA	CA	CC	CA	CA	CA	AA	CC	CC	CC	AA
Gm09_6276469	Gm09	6276469	50.95	A	0.264957	AA	AC	AC	CC	AC	AA	AC	AC	CC	CC	AC	AC	CC	AA	CC	AC	CC	AA	AC	AC	AC	AC	AC	CC	AA	AC	CC	AC	AC	AA	AA	AC	CC	AC	AC	AA	AA	AC	AC	CC	AA	AA	AA	CC
Gm09_6440090	Gm09	6440090	53.8	T	0.260684	TT	TC	TC	CC	TC	TT	TC	TC	CC	CC	TC	TC	TC	TC	CC	TC	CC	TT	TC	TC	TC	TC	TC	CC	TT	TC	CC	TC	TC	TT	TT	TC	CC	TC	TC	TT	TC	TC	TC	CC	TT	TT	TT	CC
Gm09_6440102	Gm09	6440102	54.24	A	0.260684	AA	AG	AG	GG	AG	AA	AG	AG	GG	GG	AG	AG	AG	AG	GG	AG	GG	AA	AG	AG	AG	AG	AG	GG	AA	AG	GG	AG	AG	AA	AA	AG	GG	AG	AG	AA	AG	AG	AG	GG	AA	AA	AA	GG
Gm09_6624454	Gm09	6624454	55.11	G	0.25641	GG	GT	GT	TT	GT	GG	GT	GT	TT	TT	GT	GT	GT	GT	TT	GT	TT	GG	GT	GT	GT	GT	GT	TT	GG	GT	TT	GT	GT	GG	GG	GT	TT	GT	GT	GG	GT	GT	GT	TT	GG	GG	GG	TT
Gm09_6563551	Gm09	6563551	55.54	C	0.260684	CC	CT	CT	TT	CT	CC	CT	CT	TT	TT	CT	CT	CT	CT	TT	CT	TT	CC	CT	CT	CT	CT	CT	TT	CC	CT	TT	CT	CT	CC	CC	CT	TT	CT	CT	CC	CT	CT	CT	TT	CC	CC	CC	TT
Gm09_7424710	Gm09	7424710	60.45	C	0.269231	AA	CA	CA	CC	CA	AA	CA	CA	CA	CA	CA	CA	CA	AA	CC	CA	CC	AA	CA	CA	CA	CA	CA	CC	AA	CA	CC	CA	CA	AA	AA	CA	CC	CA	CA	AA	CA	CA	CA	CC	CA	AA	CA	CC
Gm09_7424718	Gm09	7424718	60.66	A	0.273504	CC	AC	AC	AA	AC	CC	AC	AC	AC	AC	AC	AC	AC	CC	AA	AC	AA	CC	AC	AC	AC	AC	AC	AA	CC	AC	AA	AC	AC	CC	CC	AC	AA	AC	AC	CC	AC	AC	AC	AA	AC	CC	AC	AA
Gm09_7683757	Gm09	7683757	61.1	T	0.273504	GG	TG	TG	TT	TG	GG	TG	TG	TG	TG	TG	TG	TG	GG	TT	TG	TT	GG	TG	TG	TG	TG	TG	TT	GG	TG	TT	TG	TG	GG	GG	TG	TT	TG	TG	GG	TG	TG	TG	TT	TG	GG	TG	TT
Gm09_7577003	Gm09	7577003	61.53	G	0.269231	GG	GA	GA	AA	GA	GG	GA	GA	GA	GA	GA	GA	GA	GG	AA	GA	AA	GG	GA	GA	GA	GA	GA	AA	GG	GA	AA	GA	GA	GG	GG	GA	AA	GA	GA	GG	GA	GA	GA	AA	GA	GG	GA	AA
Gm09_8364898	Gm09	8364898	61.75	G	0.264957	GG	GA	GA	AA	GA	GG	GA	GA	GA	GA	GA	GA	GA	GG	AA	GA	AA	GG	GA	GA	GA	GA	GA	AA	GG	GA	AA	GA	GA	GG	GG	GA	AA	GA	GA	GG	GA	GA	GA	AA	GA	GG	GA	AA
Gm09_12486169	Gm09	12486169	64.83	T	0.282051	GG	TG	TG	TT	TG	GG	TG	TG	TG	TG	TG	TG	TG	GG	TT	TG	TT	GG	TG	GG	TG	TG	TG	TT	GG	TG	TT	TG	TG	GG	GG	TG	TT	TT	TG	GG	TG	TG	TG	TT	TG	GG	TG	TT
Gm09_12486126	Gm09	12486126	65.05	C	0.277778	TT	CT	CT	CC	CT	TT	CT	CT	CT	CT	CT	CT	CT	TT	CC	CT	CC	TT	CT	TT	CT	CT	CT	CC	TT	CT	CC	CT	CT	TT	TT	CT	CC	CC	CT	TT	CT	CT	CT	CC	CT	TT	CT	CC
Gm09_12698469	Gm09	12698469	65.48	C	0.282051	TT	CT	CT	CC	CC	TT	CT	CT	CT	CT	CT	CT	CT	TT	CC	CT	CC	TT	CT	TT	CT	CT	CT	CC	TT	CT	CC	CT	CT	TT	TT	CT	CC	CC	CT	TT	CT	CT	CT	CC	CT	TT	CT	CC
Gm09_12539625	Gm09	12539625	65.91	A	0.277778	AA	AG	AG	GG	GG	AA	AG	AG	AG	AG	AG	AG	AG	AA	GG	AG	GG	AA	AG	AA	AG	AG	AG	GG	AA	AG	GG	AG	AG	AA	AA	AG	GG	GG	AG	AA	AG	AG	AG	GG	AG	AA	AG	GG
Gm09_12873808	Gm09	12873808	66.35	G	0.282051	GG	GA	GA	AA	AA	GG	GA	GA	GA	GA	GA	GA	GA	GG	AA	GA	AA	GG	GA	GG	GA	GA	GA	AA	GG	GA	AA	GA	GA	GG	GG	GA	AA	AA	GA	GG	GA	GA	GA	AA	GA	GG	GA	AA
Gm09_13344364	Gm09	13344364	66.78	T	0.282051	TT	TC	TC	CC	CC	TT	TC	TC	TC	TC	TC	TC	TC	TT	CC	TC	CC	TT	TC	TT	TC	TC	TC	CC	TT	TC	CC	TC	TC	TT	TT	TC	CC	CC	TC	TT	TC	TC	TC	CC	TC	TT	TC	CC
Gm09_13086813	Gm09	13086813	67.65	T	0.290598	TT	TC	TC	CC	CC	TT	TC	TC	TC	TC	TC	TC	TC	TT	CC	TC	CC	TT	TC	TT	TC	TT	TC	CC	TT	TC	CC	TC	TC	TT	TT	TC	CC	CC	TC	TT	TC	TC	TC	CC	TC	TT	TC	CC
Gm09_17550922	Gm09	17550922	69.19	A	0.282051	AA	AC	AC	CC	CC	AA	AC	AC	AC	AC	AC	AC	AC	AA	CC	AC	CC	AA	AC	AA	AC	AC	AC	CC	AA	AC	CC	AC	AC	AA	AA	AC	CC	CC	AC	AA	AC	AC	AC	CC	AC	AA	AC	CC
Gm09_17276327	Gm09	17276327	69.62	T	0.277778	TT	TG	TG	GG	GG	TT	TG	TG	TG	TG	TG	TG	TG	TT	GG	TG	GG	TT	TG	TT	TG	TG	TG	GG	TT	TG	GG	TG	TG	TT	TT	TG	GG	GG	TG	TT	TG	TG	TG	GG	TG	TT	TG	GG
Gm09_19106673	Gm09	19106673	70.05	G	0.273504	GG	GT	GT	TT	TT	GG	GT	GT	GT	GT	GT	GT	GT	GG	TT	GT	TT	GG	GT	GG	GG	GT	GT	TT	GG	GT	TT	GT	GT	GG	GG	GT	TT	TT	GT	GG	GT	GT	GT	TT	GT	GG	GT	TT
Gm09_19129155	Gm09	19129155	70.27	T	0.273504	TT	TC	TC	CC	CC	TT	TC	TC	TC	TC	TC	TC	TC	TT	CC	TC	CC	TT	TC	TT	TT	TC	TC	CC	TT	TC	CC	TC	TC	TT	TT	TC	CC	CC	TC	TT	TC	TC	TC	CC	TC	TT	TC	CC
Gm09_21888756	Gm09	21888756	70.92	A	0.269231	AA	AG	AG	GG	GG	AA	AG	AG	AG	AG	AG	AG	AG	AA	GG	AG	GG	AA	AG	AA	AA	AG	AG	GG	AA	AG	GG	AG	AG	AA	AA	AG	GG	GG	AG	AA	AG	AG	AG	GG	AG	AG	AG	GG
Gm09_21888771	Gm09	21888771	71.36	C	0.273504	CC	CG	CG	GG	GG	CC	CG	CG	CG	CG	CG	CG	CG	CC	GG	CG	GG	CC	CG	CC	CC	CG	CG	GG	CC	CG	GG	CG	CG	CC	CC	CG	GG	GG	CG	CC	CG	CG	CG	GG	CG	CG	CG	GG
Gm09_22117044	Gm09	22117044	71.79	C	0.277778	CC	CT	CT	TT	TT	CC	CT	CT	CT	CT	CT	CT	CT	CC	TT	CT	TT	CC	CT	CC	CC	CT	CT	TT	CC	CT	TT	CT	CT	CC	CC	CT	TT	TT	CT	CC	CT	CT	CT	TT	CT	CT	CT	TT
Gm09_21713057	Gm09	21713057	72.22	T	0.273504	TT	TC	TC	CC	CC	TT	TC	TC	TC	TC	TC	TC	TC	TT	CC	TC	CC	TT	TC	TT	TT	TC	TC	CC	TT	TC	CC	TC	TC	TT	TT	TC	CC	CC	TC	TT	TC	TC	TC	CC	TC	TC	TC	CC
Gm09_21995753	Gm09	21995753	72.87	T	0.269231	TT	TC	TC	CC	CC	TT	TC	TC	TC	TC	TC	TC	TC	TT	CC	TC	CC	TT	TC	TT	TT	TC	TC	CC	TT	TC	CC	TC	TC	TT	TT	TC	CC	CC	TC	TT	TC	TC	TC	CC	TC	TC	TC	CC
Gm09_28463351	Gm09	28463351	74.18	T	0.269231	TT	TC	TC	CC	CC	TT	TC	TC	TC	TC	TC	TC	TC	TT	CC	TC	CC	TT	TC	TT	TT	TC	TC	CC	TT	TC	TC	TC	TC	TT	TT	TC	CC	CC	TC	TT	TC	TC	TT	CC	TC	TC	TC	CC
Gm09_28734901	Gm09	28734901	74.4	A	0.264957	AA	AG	AG	GG	GG	AA	AG	AG	AG	AG	AG	AG	AG	AA	GG	AG	GG	AA	AG	AA	AA	AG	AG	GG	AA	AG	AG	AG	AG	AA	AA	AG	GG	GG	AG	AA	AG	AG	AA	GG	AG	AG	AG	GG
Gm09_28680845	Gm09	28680845	74.62	T	0.264957	TT	TC	TC	CC	CC	TT	TC	TC	TC	TC	TC	TC	TC	TT	CC	TC	CC	TT	TC	TT	TT	TC	TC	CC	TT	TC	TC	TC	TC	TT	TT	TC	CC	CC	TC	TT	TC	TC	TT	CC	TC	TC	TC	CC
Gm09_30648549	Gm09	30648549	76.63	G	0.290598	GG	GA	GA	AA	AA	GG	GA	GA	GA	GA	GA	GA	GA	GG	AA	GA	AA	GG	GA	GG	GG	GA	GA	AA	GG	GA	GA	GA	GA	GG	GG	GA	AA	AA	GA	GG	AA	GA	GG	AA	GA	GA	GA	AA
Gm09_30947832	Gm09	30947832	78.87	A	0.273504	AA	AG	AG	GG	GG	AA	AG	AG	AG	AG	AG	AG	AG	AA	GG	AG	GG	AA	AG	AA	AA	AG	AG	GG	AA	AG	AG	AG	AG	AA	AA	AG	GG	GG	AG	AA	GG	AG	AA	GG	AG	AG	AG	GG
Gm09_31854583	Gm09	31854583	79.96	A	0.273504	AA	AG	AG	GG	GG	AA	AG	AG	AG	AG	AG	AG	AG	AA	GG	AG	GG	AA	AG	AA	AA	AG	AG	GG	AA	AG	AG	AG	AG	AA	AA	AG	GG	GG	AG	AA	GG	AG	AA	GG	AG	AG	GG	GG
Gm09_31133502	Gm09	31133502	80.17	T	0.269231	TT	TC	TC	CC	CC	TT	TC	TC	TC	TC	TC	TC	TC	TT	CC	TC	CC	TT	TC	TT	TT	TC	TC	CC	TT	TC	TC	TC	TC	TT	TT	TC	CC	CC	TC	TT	CC	TC	TT	CC	TC	TC	TC	CC
Gm09_30350192	Gm09	30350192	80.83	T	0.273504	TT	TC	TC	CC	CC	TT	TC	TC	TC	TC	TC	TC	TC	TT	CC	TC	CC	TT	TC	TT	TT	TT	TC	CC	TT	TC	TC	TC	TC	TT	TT	TC	CC	CC	TC	TT	CC	TC	TT	CC	CC	TC	TC	CC
Gm09_31241106	Gm09	31241106	81.7	T	0.269231	TT	TG	TG	GG	GG	TT	TG	TG	TG	TG	TG	TG	TG	TT	GG	TG	GG	TT	TG	TT	TT	TG	TG	GG	TT	TG	TG	TG	TG	TT	TT	TG	GG	GG	TG	TT	GG	TG	TT	GG	TG	TG	TG	GG
Gm09_31051788	Gm09	31051788	82.35	G	0.273504	AA	GA	GA	GG	GG	AA	GA	GA	GA	GA	GA	GA	GA	AA	GG	GA	GG	AA	GA	AA	AA	GA	GA	GG	AA	GA	GA	GA	GA	AA	AA	GA	GG	GG	GA	AA	GG	GA	AA	GG	GA	GA	GA	GG
Gm09_31907206	Gm09	31907206	85.93	C	0.316239	TT	CC	CT	CC	CC	TT	CT	CT	CT	CT	CT	CT	CT	TT	CC	CT	CC	TT	CT	TT	TT	CT	CC	CC	TT		CT	CT	CT	TT	TT	CT	CC	CC	CT	TT	CC	CT	TT	CC	TT	CT	CC	CC
Gm09_32787500	Gm09	32787500	89.73	C	0.277778	TT	CT	CT	CC	CC	TT	CT	CT	CT	CT	CT	CT	CT	TT	CC	CT	CC	TT	CT	TT	TT	CT	CT	CC	TT	CT	CT	CT	CT	TT	TT	CT	CC	CC	CT	TT	CC	CT	TT	CC	CT	CT	CC	CC
Gm09_33266737	Gm09	33266737	90.17	C	0.273504	TT	CT	CT	CC	CC	TT	CT	CT	CT	CT	CT	CT	CT	TT	CC	CT	CC	TT	CT	TT	TT	CT	CT	CC	TT	CT	CT	CT	CT	TT	TT	CT	CC	CC	CT	TT	CC	CT	TT	CC	CT	CT	CC	CC
Gm09_33612879	Gm09	33612879	90.82	C	0.277778	GG	CG	CG	CC	CC	GG	CG	CG	CG	CG	CG	CG	CG	GG	CC	CG	CC	GG	CG	GG	GG	CG	CG	CC	GG	CG	CG	CG	CG	GG	GG	CG	CC	CC	CG	GG	CC	CG	GG	CC	CG	CG	CC	CC
Gm09_33723439	Gm09	33723439	91.25	G	0.277778	TT	GT	GT	GG	GG	TT	GT	GT	GT	GT	GT	GT	GT	TT	GG	GT	GG	TT	GT	TT	TT	GT	GT	GG	TT	GT	GT	GT	GT	TT	TT	GT	GG	GG	GT	TT	GG	GT	TT	GG	GT	GT	GG	GG
Gm09_33612913	Gm09	33612913	91.47	T	0.273504	CC	TC	TC	TT	TT	CC	TC	TC	TC	TC	TC	TC	TC	CC	TT	TC	TT	CC	TC	CC	CC	TC	TC	TT	CC	TC	TC	TC	TC	CC	CC	TC	TT	TT	TC	CC	TT	TC	CC	TT	TC	TC	TT	TT
Gm09_33846956	Gm09	33846956	91.9	A	0.282051	GG	AG	AG	AA	AA	GG	AG	AG	AG	AG	AG	AG	AG	GG	AA	AG	AA	GG	AG	GG	GG	AG	AG	AA	GG	AG	AG	AG	AG	GG	GG	AG	AA	AA	AG	GG	AA	AG	GG	AA	AG	AG	AA	AA
Gm09_33846981	Gm09	33846981	92.55	A	0.294872	GG	AA	AG	AA	AA	GG	AG	AG	AG	AG	AG	AG	AG	GG	AA	AG	AA	GG	AG	GG	GG	AA	AG	AA	GG	AG	AG	AG	AG	GG	GG	AG	AA	AA	AG	GG	AA	AG	GG	AA	AG	AG	AA	AA
Gm09_34285711	Gm09	34285711	94.08	T	0.286325	AA	TA	TA	TT	TT	AA	TA	TA	TA	TA	TA	TA	TA	AA	TT	TA	TT	AA	TA	AA	AA	TA	TA	TT	AA	TA	TA	TA	TA	AA	AA	TA	TT	TT	TA	AA	TT	TA	AA	TT	TA	TA	TT	TT
Gm09_34192388	Gm09	34192388	94.52	A	0.277778	GG	AG	AG	AA	AA	GG	AG	AG	AG	AG	AG	AG	AG	GG	AA	AG	AA	GG	AG	GG	GG	AG	AG	AA	GG	AG	AG	AG	AG	GG	GG	AG	AA	AA	AG	GG	AA	AG	GG	AA	AG	AG	AA	AA
Gm09_35761623	Gm09	35761623	95.82	T	0.273504	TT	TC	TC	CC	CC	TT	TC	TC	TC	TC	TT	TC	TC	TT	CC	TC	CC	TT	TC	TT	TT	TC	TC	CC	TT	TC	TC	TC	TC	TT	TT	TC	CC	CC	TC	TT	CC	TC	TT	CC	TC	TC	CC	CC
Gm09_35816928	Gm09	35816928	96.04	A	0.277778	TT	AT	AT	AA	AA	TT	AT	AT	AT	AT	TT	AT	AT	TT	AA	AT	AA	TT	AT	TT	TT	AT	AT	AA	TT	AT	AT	AT	AT	TT	TT	AT	AA	AA	AT	TT	AA	AT	TT	AA	AT	AT	AA	AA
Gm09_36421451	Gm09	36421451	96.69	G	0.277778	GG	GT	GT	TT	TT	GG	GT	GT	GT	GT	GG	GT	GT	GG	TT	GT	TT	GG	GT	GG	GG	GT	GT	TT	GG	GT	GT	GT	GT	GG	GG	GT	TT	TT	GT	GG	TT	GT	GG	TT	GT	GT	TT	TT
Gm09_36637159	Gm09	36637159	96.91	G	0.282051	GG	GT	GT	TT	TT	GG	GT	GT	GT	GT	GG	GT	GT	GG	TT	GT	TT	GG	GT	GG	GG	GT	GT	TT	GG	GT	GT	GT	GT	GG	GG	GT	TT	TT	GT	GG	TT	GT	GG	TT	GT	GT	TT	TT
Gm09_36774262	Gm09	36774262	97.78	T	0.286325	TC	TC	TC	CC	CC	TT	TC	TC	TC	TC	TT	TC	TC	TT	CC	TC	CC	TT	TC	TT	TT	TC	CC	CC	TT	TC	TC	TC	TC	TT	TT	TC	CC	CC	TC	TT	CC	TC	TT	CC	TC	TC	CC	CC
Gm09_36902038	Gm09	36902038	98.64	C	0.303419	CT	CT	CT	CC	CC	TT	CT	CT	CT	CT	TT	CT	CT	TT	CC	CT	CC	TT	CT	TT	TT	CT	CC	CC	TT	CT	CT	CT	CT	TT	TT	CT	CC	CC	CT	TT	CC	CT	TT	CC	CT	CT	CC	CC
Gm09_36902013	Gm09	36902013	99.29	T	0.290598	TC	TC	TC	TT	TT	CC	TC	TC	TC	TC	CC	TC	TC	CC	TT	TC	TT	CC	TC	CC	CC	TC	TT	TT	CC	TC	TC	TC	TC	CC	CC	TC	TT	TT	TC	CC	TT	TC	CC	TT	TC	TC	TT	TT
Gm09_37389734	Gm09	37389734	100.16	T	0.294872	TC	TC	TC	TT	TT	TC	TC	TC	TC	TC	CC	TC	TC	CC	TT	TC	TT	CC	TC	CC	CC	TT	TT	TT	CC	TC	TC	TC	TC	CC	CC	TC	TT	TT	TC	CC	TT	TC	CC	TT	TC	TC	TT	TT
Gm09_37479869	Gm09	37479869	103.69	A	0.286325	AT	AT	AT	TT	TT	AT	AT	AT	AT	AT	AA	AT	AT	AA	TT	AT	TT	AA	AT	AA	AA	TT	TT	TT	AA	AT	AT	AT	AT	AA	AA	AT	TT	TT	AT	AA	TT	AT	AA	TT	AT	AT	TT	TT
Gm09_37479825	Gm09	37479825	105.44	A	0.294872	AT	AT	AT	TT	TT	AT	AT	AT	AT	AT	AA	AT	AA	AA	TT	AT	TT	AA	AT	AA	AA	TT	TT	TT	AA	AT	AT	AT	AT	AA	AA	AT	TT	TT	AT	AA	TT	AT	AA	TT	AT	AT	TT	TT
Gm09_37542276	Gm09	37542276	109.19	T	0.286325	TC	TC	TC	TT	TT	TC	TC	TC	TC	TC	CC	TC	TC	CC	TT	TC	TT	CC	TC	CC	CC	TT	TT	TT	CC	TC	TC	TC	TC	CC	CC	TC	TT	TT	TC	CC	TT	TC	CC	TT	TC	TC	TT	TT
Gm09_37542319	Gm09	37542319	109.62	C	0.290598	CG	CG	CG	CC	CC	CG	CG	CG	CG	CG	GG	CG	CG	GG	CC	CG	CC	GG	CG	GG	GG	CC	CC	CC	GG	CG	CG	CG	CG	GG	GG	CG	CC	CC	CG	GG	CC	CG	GG	CC	CG	CG	CC	CC
Gm09_37783802	Gm09	37783802	109.83	T	0.290598	TC	TC	TC	TT	TT	TC	TC	TC	TC	TC	CC	TC	TC	CC	TT	TC	TT	CC	TC	CC	CC	TT	TT	TT	CC	TC	TC	TC	TC	CC	CC	TC	TT	TT	TC	CC	TT	TC	CC	TT	TC	TC	TT	TT
Gm09_37877689	Gm09	37877689	110.05	C	0.294872	CT	CT	CT	CC	CC	CT	CT	CT	CT	CT	TT	CT	CT	TT	CC	CT	CC	TT	CT	TT	TT	CC	CC	CC	TT	CT	CT	CT	CT	TT	TT	CT	CC	CC	CT	TT	CC	CC	TT	CC	CT	CT	CC	CC
Gm09_37987099	Gm09	37987099	110.27	T	0.290598	TC	TC	TC	TT	TT	TC	TC	TC	TC	TC	CC	TC	TC	CC	TT	TC	TT	CC	TC	CC	CC	TT	TT	TT	CC	TC	TC	TC	TC	CC	CC	TC	TT	TT	TC	CC	TT	TT	CC	TT	TC	TC	TT	TT
Gm09_37987131	Gm09	37987131	110.48	T	0.294872	TC	TC	TC	TT	TT	TC	TC	TC	TC	TC	CC	TC	TC	CC	TT	TC	TT	CC	TC	CC	CC	TT	TT	TT	CC	TC	TC	TC	TC	CC	CC	TC	TT	TT	TC	CC	TT	TT	CC	TT	TC	TC	TT	TT
Gm09_38290401	Gm09	38290401	111.14	A	0.299145	AC	AC	AC	AA	AA	AC	AC	AC	AC	AC	CC	AC	AC	CC	AA	AC	AA	CC	AA	CC	CC	AA	AA	AA	CC	AC	AC	AC	AC	CC	CC	AC	AA	AA	AC	CC	AA	AA	CC	AA	AC	AC	AA	AA
Gm09_38097450	Gm09	38097450	111.35	T	0.294872	TC	TC	TC	TT	TT	TC	TC	TC	TC	TC	CC	TC	TC	CC	TT	TC	TT	CC	TT	CC	CC	TT	TT	TT	CC	TC	TC	TC	TC	CC	CC	TC	TT	TT	TC	CC	TT	TT	CC	TT	TC	TC	TT	TT
Gm09_38377448	Gm09	38377448	111.79	C	0.290598	CT	CT	CT	CC	CC	CT	CT	CT	CT	CT	TT	CT	CT	TT	CC	CT	CC	TT	CC	TT	TT	CC	CC	CC	TT	CT	CT	CT	CT	TT	TT	CT	CC	CC	CT	TT	CC	CC	TT	CC	CT	CT	CC	CC
Gm09_38897710	Gm09	38897710	112.44	T	0.290598	TC	TC	TC	TT	TT	TC	TC	TC	TC	TC	CC	TC	TC	CC	TT	TC	TT	CC	TT	CC	CC	TT	TT	TT	CC	TC	TC	TC	TC	CC	CC	TC	TT	TT	TC	CC	TT	TT	CC	TT	TC	TC	TT	TT
Gm09_38854583	Gm09	38854583	114.42	C	0.316239	CT	CT	CT	CC	CC	CT	CT	CT	CT	CT	TT	CT	CT	TT	CC	CT	CC	TT	CC	TT	TT	CC	CC	CC	TT	CT	CT	CT	CT	TT	TT	CC	CC	CC	CC	TT	CC	CC	TT	CC	CT	CT	CC	CC
Gm09_38854540	Gm09	38854540	116.18	C	0.294872	CT	CT	CT	CC	CC	CT	CT	CT	CT	CT	TT	CT	CT	TT	CC	CT	CC	TT	CC	TT	TT	CC	CC	CC	TT	CT	CT	CT	CT	TT	TT	CT	CC	CC	CT	TT	CC	CC	TT	CC	CT	CT	CC	CC
Gm09_38773861	Gm09	38773861	116.84	T	0.286325	TC	TC	TC	TT	TT	TC	TC	TC	TC	TC	CC	TC	TC	CC	TT	TC	TT	CC	TT	CC	CC	TT	TT	TT	CC	TC	TC	TC	TC	CC	CC	TC	TT	TT	TC	CC	TT	TT	CC	TT	TC	TC	TT	TT
Gm09_38574139	Gm09	38574139	117.71	C	0.299145	CT	CT	CT	CC	CC	CT	CT	CT	CT	CT	TT	CT	CT	TT	CC	CT	CC	TT	CC	TT	TT	CC	CC	CC	TT	CT	CT	CT	CT	TT	TT	CT	CC	CC	CT	TT	CC	CC	TT	CC	CT	CT	CC	CC
Gm09_38574114	Gm09	38574114	117.93	G	0.294872	GA	GA	GA	GG	GG	GA	GA	GA	GA	GA	AA	GA	GA	AA	GG	GA	GG	AA	GG	AA	AA	GG	GG	GG	AA	GA	GA	GA	GA	AA	AA	GA	GG	GG	GA	AA	GG	GG	AA	GG	GA	GA	GG	GG
Gm09_39045009	Gm09	39045009	119.68	A	0.273504	AG	AG	AG	GG	GG	AG	AG	AG	AG	AG	AA	AG	AG	AA	GG	AG	GG	AA	GG	AA	AA	GG	GG	GG	AA	AG	AG	AG	AG	AA	AA	AG	GG	GG	AA	AA	GG	GG	AA	GG	AG	AG	GG	GG
Gm09_39045005	Gm09	39045005	119.9	A	0.273504	AG	AG	AG	GG	GG	AG	AG	AG	AG	AG	AA	AG	AG	AA	GG	AG	GG	AA	GG	AA	AA	GG	GG	GG	AA	AG	AG	AG	AG	AA	AA	AG	GG	GG	AA	AA	GG	GG	AA	GG	AG	AG	GG	GG
Gm09_39137680	Gm09	39137680	120.55	T	0.273504	TC	TC	TC	CC	CC	TC	TC	TC	TC	TC	TT	TC	TC	TT	CC	TC	CC	TT	CC	TT	TT	CC	CC	CC	TT	TC	TC	TC	TC	TT	TT	TC	CC	CC	TC	TT	CC	CC	TT	CC	TC	TC	CC	CC
Gm09_39192369	Gm09	39192369	121.64	T	0.277778	TC	TC	TC	TT	TT	TC	TC	TC	TC	TC	CC	TC	TC	CC	TT	TC	TT	CC	TT	CC	CC	TT	TT	TT	CC	TC	TC	TC	TC	CC	CC	TC	TT	TT	TC	CC	TT	TT	TC	TT	TC	TC	TT	TT
Gm09_39281149	Gm09	39281149	122.29	A	0.273504	AG	AG	AG	AA	AA	AG	AG	AG	AG	GG	GG	AG	AG	GG	AA	AG	AA	GG	AA	GG	GG	AG	AA	AA	GG	AG	AG	AG	AG	GG	GG	AG	AA	AA	AG	GG	AA	AA	AG	AA	AG	AG	AA	AA
Gm09_39281165	Gm09	39281165	122.94	C	0.282051	CT	CT	CT	CC	CC	CT	CT	CT	CT	TT	TT	CT	CT	TT	CC	CT	CC	TT	CC	TT	TT	CT	CC	CC	TT	CT	CT	CT	CT	TT	TT	CT	CC	CC	CT	TT	CC	CC	CT	CC	CT	CT	CC	CC
Gm09_39281197	Gm09	39281197	124.04	C	0.286325	CT	CT	CT	CC	CC	CT	CC	CT	CT	TT	TT	CT	CT	TT	CC	CT	CC	TT	CC	TT	TT	CT	CC	CC	TT	CT	CT	CT	CT	TT	TT	CT	CC	CC	CT	TT	CC	CC	CT	CC	CT	CT	CC	CC
Gm09_39339909	Gm09	39339909	125.58	G	0.273504	GA	GA	GA	AA	AA	GA	GA	GA	GA	GG	GG	GA	GA	GG	AA	GA	AA	GG	AA	GG	GG	GA	AA	AA	GG	GA	GA	GA	GA	GG	GG	GA	AA	AA	GA	GG	AA	AA	GA	AA	GA	GA	AA	AA
Gm09_39408024	Gm09	39408024	126.45	A	0.269231	AC	AC	AC	CC	CC	AC	AC	AC	AC	AA	AA	AC	AA	AA	CC	AC	CC	AA	CC	AA	AA	AC	CC	CC	AA	AC	AC	AC	AC	AA	AA	AC	CC	CC	AC	AA	CC	CC	AC	CC	AC	AC	CC	CC
Gm09_39565251	Gm09	39565251	126.88	C	0.277778	CT	CT	CT	CC	CC	CT	CT	CT	CT	TT	TT	CT	TT	TT	CC	CT	CC	TT	CC	TT	TT	CT	CC	CC	TT	CT	CT	CT	CT	TT	TT	CT	CC	CC	CT	TT	CC	CC	CT	CC	CT	CT	CC	CC
Gm09_39565276	Gm09	39565276	127.32	T	0.273504	TC	TC	TC	CC	CC	TC	TC	TC	TC	TT	TT	TC	TT	TT	CC	TC	CC	TT	CC	TT	TT	TC	CC	CC	TT	TC	TC	TC	TC	TT	TT	TC	CC	CC	TC	TT	CC	CC	TC	CC	TC	TC	CC	CC
Gm09_39408053	Gm09	39408053	127.75	C	0.264957	CT	CT	CT	TT	TT	CT	CT	CT	CT	CC	CC	CT	CC	CC	TT	CT	TT	CC	TT	CC	CC	CT	TT	TT	CC	CT	CT	CT	CT	CC	CC	CT	TT	TT	CT	CC	TT	TT	CT	TT	CT	CT	TT	TT
Gm09_39582587	Gm09	39582587	132.7	T	0.316239	TT	TC	TC	CC	CC	TC	TT	TC	TC	TT	TT	TC	TT	TT	CC	TC	CC	TT	CC	TT	TT	TC	CC	CC	TT	TC	TC	TT	TC	TT	TT	TC	CC	CC	TC	TT	CC	CC	TC	CC	TC	TC	CC	CC
Gm09_39582527	Gm09	39582527	137.18	G	0.307692	GA	GA	GA	AA	AA	GA	GG	GA	GG	GG	GG	GA	GG	GG	AA	GA	AA	GG	AA	GG	GG	GA	AA	AA	GG	GA	GA	GG	GA	GG	GG	GA	AA	AA	GG	GG	AA	AA	GA	AA	GA	GA	AA	AA
Gm09_39745658	Gm09	39745658	143.95	T	0.294872	TC	TC	TC	TT	TT	TC	TC	TC	TC	CC	CC	TC	CC	CC	TT	TC	TT	CC	TT	CC	CC	TC	TT	TT	CC	TC	TC	TC	TC	CC	CC	TC	TT	TT	TC	CC	TT	TT	TC	TT	TC	TC	TT	TT
Gm09_39745617	Gm09	39745617	145.03	G	0.290598	GT	GT	GT	GG	GG	GT	GT	GT	GT	TT	TT	GT	TT	TT	GG	GT	GG	TT	GG	TT	TT	GT	GG	GG	TT	GT	GT	GT	GT	TT	TT	GT	GG	GG	GT	TT	GG	GG	GT	GG	GT	GT	GG	GG
Gm09_39745627	Gm09	39745627	145.47	C	0.299145	CT	CT	CT	CC	CC	CT	CT	CT	CT	TT	TT	CT	TT	TT	CC	CT	CC	TT	CC	TT	TT	CT	CC	CC	TT	CT	CT	CT	CT	TT	TT	CT	CC	CC	CT	TT	CC	CC	CT	CC	CT	CT	CC	CC
Gm09_39745638	Gm09	39745638	145.68	C	0.294872	CT	CT	CT	CC	CC	CT	CT	CT	CT	TT	TT	CT	TT	TT	CC	CT	CC	TT	CC	TT	TT	CT	CC	CC	TT	CT	CT	CT	CT	TT	TT	CT	CC	CC	CT	TT	CC	CC	CT	CC	CT	CT	CC	CC
Gm09_39901763	Gm09	39901763	147.65	A	0.282051	AT	AT	AT	AA	AA	AT	AT	AT	AT	TT	TT	AT	TT	TT	AA	AT	AA	TT	AA	TT	TT	AT	AA	AA	TT	AT	AT	AT	AT	TT	TT	AT	AA	AA	AT	TT	AA	AA	AT	AA	AT	AT	AA	AA
Gm09_39901749	Gm09	39901749	148.3	T	0.290598	TC	TC	TC	TT	TT	TC	TC	TC	TC	CC	CC	TC	CC	CC	TT	TC	TT	CC	TT	CC	CC	TC	TT	TT	CC	TC	TC	TC	TC	CC	CC	TC	TT	TT	TC	CC	TT	TT	TC	TT	TC	TC	TT	TT
Gm09_39933490	Gm09	39933490	150.71	C	0.277778	CA	CA	CA	CC	CC	CA	CA	CA	CA	AA	AA	CA	AA	AA	CC	CA	CC	AA	CC	AA	AA	CA	CC	CC	AA	CA	CA	CA	CA	AA	AA	CA	CC	CC	CA	AA	CC	CC	CA	CC	CA	CA	CC	CC
Gm09_39933483	Gm09	39933483	151.58	C	0.277778	CA	CA	CA	AA	AA	CA	CA	CA	CA	CC	CC	CA	CC	CC	AA	CA	AA	CC	AA	CC	CC	CA	AA	AA	CC	CA	CA	CA	CA	CC	CC	CA	AA	AA	CA	CC	AA	AA	CA	AA	CA	CA	AA	AA
Gm09_39933463	Gm09	39933463	153.55	C	0.286325	CT	CT	CT	TT	TT	CT	CT	CT	CT	CC	CC	CT	CC	CC	TT	CT	TT	CC	TT	CC	CC	CT	TT	TT	CC	CT	CT	CT	CT	CC	CC	CT	TT	TT	CT	CC	TT	TT	CT	TT	CT	CT	TT	TT
Gm09_39933510	Gm09	39933510	155.29	C	0.277778	CT	CT	CT	TT	TT	CT	CT	CT	CT	CC	CC	CT	CC	CC	TT	CT	TT	CC	TT	CC	CC	CT	TT	TT	CC	CT	CT	CT	CT	CC	CC	CT	TT	TT	CT	CC	TT	TT	CT	TT	CT	CT	TT	TT
Gm09_40156962	Gm09	40156962	157.26	C	0.277778	CT	CT	CT	TT	TT	CT	CT	CT	CT	CC	CC	CT	CC	CC	TT	CT	TT	CC	TT	CC	CC	CT	TT	TT	CC	CT	CT	CT	CT	CC	CC	CT	TT	TT	CT	CC	TT	TT	CT	TT	CT	CT	TT	TT
Gm09_40254177	Gm09	40254177	158.13	T	0.273504	TA	TA	TA	TT	TT	TA	TA	TA	TA	AA	AA	TA	AA	AA	TT	TA	TT	AA	TT	AA	AA	TA	TT	TT	AA	TA	TA	TA	TA	AA	AA	TA	TT	TT	TA	AA	TT	TT	TA	TT	TA	TA	TT	TT
Gm09_40348858	Gm09	40348858	158.78	C	0.273504	CT	CT	CT	CC	CC	CT	CT	CT	CT	TT	TT	CT	TT	TT	CC	CT	CC	TT	CC	TT	TT	CT	CC	CC	TT	CT	CT	CT	CT	TT	TT	CT	CC	CC	CT	TT	CC	CC	CT	CC	CT	CT	CT	CC
Gm09_40416324	Gm09	40416324	159.87	C	0.273504	CT	CT	CT	CT	CC	CT	CT	CT	CT	TT	TT	CT	TT	TT	CC	CT	CC	TT	CC	CT	TT	CT	CC	CC	TT	CT	CT	CT	CT	TT	TT	CT	CC	CC	CT	TT	CC	CC	CT	CC	CT	CT	CT	CC
Gm09_40454026	Gm09	40454026	160.95	G	0.277778	GA	GA	GA	GA	GG	GA	GA	GA	GA	AA	AA	GA	AA	AA	GG	GA	GG	AA	GG	GA	AA	GA	GG	GG	AA	GA	GA	GA	GA	AA	AA	GA	GG	GG	GA	AA	GG	GG	GA	GG	GA	GA	GA	GG
Gm09_41111809	Gm09	41111809	166.05	T	0.277778	TC	TC	TC	TC	CC	TC	TC	TC	TC	TT	TT	TC	TT	TT	CC	TC	CC	TT	CC	TC	TT	TC	TC	CC	TT	TC	TC	TC	TC	TT	TT	CC	CC	CC	TC	TT	CC	CC	CC	CC	TC	TC	TC	CC
Gm09_41111817	Gm09	41111817	166.48	C	0.273504	CT	CT	CT	CT	TT	CT	CT	CT	CT	CC	CC	CT	CC	CC	TT	CT	TT	CC	TT	CT	CC	CT	CT	TT	CC	CT	CT	CT	CT	CC	CC	TT	TT	TT	CT	CC	TT	TT	TT	TT	CT	CT	CT	TT
Gm09_41183456	Gm09	41183456	167.57	G	0.277778	GA	GA	GA	GA	AA	GA	GA	GA	GA	GG	GG	GA	GG	GG	AA	GA	AA	GG	AA	GA	GG	GA	GA	AA	GG	GA	GA	GA	GA	GG	GG	AA	AA	AA	GA	GG	AA	AA	AA	AA	GA	GA	GA	AA
Gm09_41291506	Gm09	41291506	168	G	0.273504	GT	GT	GT	GT	TT	GT	GT	GT	GT	GG	GG	GT	GG	GG	TT	GT	TT	GG	TT	GT	GG	GT	GT	TT	GG	GT	GT	GT	GT	GG	GG	TT	TT	TT	GT	GG	TT	TT	TT	TT	GT	GT	GT	TT
Gm09_46932844	Gm09	46932844	213.13	T	0.299145	TT	TG	TT	GG	GG	TG	TG	TG	TT	TG	TG	TG	TG	GG	TT	TT	GG	TG	TT	TG	TG	TG	TG	TG	TG	TG	TG	TG	TT	GG	TG	TT	TG	GG	TT	GG	GG	TT	TT	GG	TG	TG	TG	TG
Gm09_47128373	Gm09	47128373	213.78	A	0.294872	AA	AT	AA	TT	TT	AT	AT	AT	AA	AT	AT	AT	AT	TT	AA	AA	TT	AT	AA	AT	AT	AT	AT	AT	AT	AT	AT	AT	AA	TT	AT	AA	AT	TT	AA	TT	TT	AA	AA	TT	AT	AT	AT	AT
Gm09_47163751	Gm09	47163751	214.22	C	0.294872	CC	CT	CC	TT	TT	CT	CT	CT	CC	CT	CT	CT	CT	TT	CC	CC	TT	CT	CC	CT	CT	CT	CT	CT	CT	CT	CT	CT	CC	TT	CT	CC	CT	TT	CC	TT	TT	CC	CC	TT	CT	CT	CT	CT
Gm09_47282718	Gm09	47282718	215.96	A	0.299145	AA	AG	AA	GG	GG	AG	AG	AG	AA	AG	AG	AG	AG	GG	AA	AA	GG	AG	AA	AG	AG	AG	AG	AG	AG	AG	AG	AG	AA	GG	AG	AA	AG	GG	AA	GG	GG	AA	AA	GG	AG	AG	AG	AG
Gm09_47282702	Gm09	47282702	216.83	G	0.307692	GG	GA	GG	AA	AA	GA	GA	GA	GG	GA	GG	GA	GA	AA	GG	GG	AA	GA	GG	GA	GA	GA	GA	GA	GA	GA	GA	GA	GG	AA	GA	GG	GA	AA	GG	AA	AA	GG	GG	AA	GA	GA	GA	GA
Gm09_47434080	Gm09	47434080	219.91	C	0.303419	CC	CT	CC	TT	TT	CT	CT	CT	CC	CT	CC	CT	CT	TT	CC	CC	TT	CT	CC	CT	CT	CT	CC	CT	CT	CT	CT	CT	CC	TT	CT	CC	CT	TT	CC	TT	TT	CC	CC	TT	CT	CT	CT	CT
Gm09_47382148	Gm09	47382148	222.11	G	0.286325	GG	GT	GG	TT	TT	GT	GT	GT	GG	GT	GT	GT	GT	TT	GG	GG	TT	GT	GG	GT	GT	GT	GT	GT	GT	GT	GT	GT	GG	TT	GT	GG	GT	TT	GG	TT	TT	GG	GG	TT	GT	GT	GT	GT
Gm09_47533455	Gm09	47533455	223.2	C	0.277778	CC	CA	CC	AA	AA	CA	CA	CA	CC	CA	CA	CA	CA	AA	CC	CC	AA	CA	CC	CA	CA	CC	CA	CA	CA	CA	CA	CA	CC	AA	CA	CC	CA	AA	CC	AA	AA	CC	CC	AA	CA	CA	CA	CA
Gm09_47782037	Gm09	47782037	225.17	G	0.299145	GG	GT	GG	TT	TT	GT	GT	GT	GG	GT	GT	GT	GT	TT	GG	GG	TT	GT	GG	GT	GT	GG	GG	GT	GT	GT	GT	GT	GG	TT	GG	GG	GT	TT	GG	TT	TT	GG	GG	TT	GT	GT	GT	GT
Gm09_47782014	Gm09	47782014	225.61	C	0.299145	CC	CA	CC	AA	AA	CA	CA	CA	CC	CA	CA	CA	CA	AA	CC	CC	AA	CA	CC	CA	CA	CC	CC	CA	CA	CA	CA	CA	CC	AA	CC	CC	CA	AA	CC	AA	AA	CC	CC	AA	CA	CA	CA	CA
Gm09_47850102	Gm09	47850102	227.58	T	0.277778	TT	TC	TT	CC	CC	TC	TC	TC	TT	TC	TC	TC	TC	CC	TT	TT	CC	TC	TT	TC	TC	TT	TC	TC	TC	TC	TC	TC	TT	CC	TC	TT	TC	CC	TT	CC	CC	TT	TT	CC	TC	TC	TC	TC
Gm09_47941391	Gm09	47941391	228.02	C	0.269231	CC	CT	CC	TT	TT	CT	CT	CT	CC	CT	CT	CT	CT	TT	CC	CC	TT	CT	CC	CT	CT	CC	CT	CT	CT	CT	CT	CT	CC	TT	CT	CC	CT	TT	CC	TT	TT	CC	CC	TT	CT	CT	CT	CT
Gm09_48051761	Gm09	48051761	228.23	G	0.264957	GG	GA	GG	AA	AA	GA	GA	GA	GG	GA	GA	GA	GA	AA	GG	GG	AA	GA	GG	GA	GA	GG	GA	GA	GA	GA	GA	GA	GG	GA	GA	GG	GA	AA	GG	AA	AA	GG	GG	AA	GA	GA	GA	GA
Gm09_49552964	Gm09	49552964	236.15	A	0.294872	TT	AT	TT	AT	AA	AT	AT	AT	TT	AA	AT	AT	TT	AA	AT	TT	AT	AT	AT	AT	AT	TT	AA	AT	AT	AT	TT	AT	TT	AT	AT	TT	AT	AA	TT	AA	AA	TT	TT	AA	AT	AT	AA	AA
Gm09_49893816	Gm09	49893816	236.8	G	0.299145	AA	GA	AA	GA	GG	GA	GA	GA	AA	GG	GA	GA	AA	GG	GA	AA	GA	GA	GA	GA	GA	AA	GG	GA	GA	GA	AA	GA	AA	GA	GA	AA	GA	GG	AA	GG	GG	AA	AA	GG	GA	GA	GG	GG
Gm09_20218437	Gm09	20218437	348.46	G	0.282051	GA	GA	GA	AA	GA	GG	GA	GG	GG	AA	GG	AA	AA	GA	GG	GA	AA	GA	GA	AA	GA	GA	AA	AA	GG	GA	AA	GG	AA	GA	GA	GA	GG	GA	GA	AA	GG	GA	GG	GG	GA	AA	GG	GG
Gm10_43899046	Gm10	43899046	0	C	0.252137	CC	CT	CT	CC	CT	CT	TT	CT	TT	CC	CT	CT	TT	CT	CT	TT	CT	CT	CT	CC	CT	CT	TT	TT	TT	TT	TT	CC	TT	TT	CT	CT	CC	TT	CT	CC	CT	CC	CT	TT	CT	TT	CT	TT
Gm10_42561327	Gm10	42561327	7.95	A	0.282051	AA	AC	AC	AA	AC	CC	CC	AC	CC	AA	AC	AC	CC	AC	AC	CC	AC	AC	AC	AA	AC	AC	AC	CC	AC	CC	CC	AA	AC	CC	AC	AC	AA	CC	AC	AA	AC	AA	AA	CC	AC	CC	AC	CC
Gm10_42561307	Gm10	42561307	8.38	T	0.282051	TT	TC	TC	TT	TC	CC	CC	TC	CC	TT	TC	TC	CC	TC	TC	CC	TC	TT	TC	TT	TC	TC	TC	CC	TC	CC	CC	TT	TC	CC	TC	TC	TT	CC	TC	TT	TC	TT	TT	CC	TC	CC	TC	CC
Gm10_42561289	Gm10	42561289	9.25	C	0.282051	CC	CT	CT	CC	CT	TT	TT	CT	TT	CC	CT	CT	TT	CT	CT	TT	CC	CT	CT	CC	CT	CT	CT	TT	CT	TT	TT	CC	CT	TT	CT	CT	CC	TT	CT	CC	CT	CC	CC	TT	CT	TT	CT	TT
Gm10_42430713	Gm10	42430713	10.56	A	0.25641	AA	AG	AG	AA	AG	GG	GG	AG	GG	AA	AG	AG	GG	AG	AG	GG	AG	AG	AG	AA	AG	AG	AG	GG	AG	GG	GG	AA	AG	GG	AG	AG	AA	GG	AG	AA	AG	AA	AA	GG	AG	GG	AG	GG
Gm10_42264102	Gm10	42264102	11.87	A	0.264957	AA	AT	AT	AA	AT	AT	TT	AT	TT	AA	AT	AT	TT	AT	AT	TT	AT	AT	AT	AA	AT	AT	AT	TT	AT	TT	TT	AA	AT	TT	AT	AT	AA	TT	AT	AA	AT	AA	AA	TT	AT	TT	AT	TT
Gm10_42033899	Gm10	42033899	12.73	A	0.25641	AA	AG	AG	AA	AG	AG	GG	AG	GG	AA	AG	AG	GG	AG	AG	GG	AG	AG	AG	AA	AG	AG	AG	GG	AG	GG	GG	AA	AG	GG	AG	AG	AA	GG	AG	AA	AG	AA	AA	GG	AG	GG	AG	GG
Gm10_42092745	Gm10	42092745	16.05	C	0.320513	CC	CT	CT	CC	CT	CC	TT	CT	TT	CC	CT	CT	TT	CT	CT	TT	CT	CT	CT	CC	CC	CT	CT	TT	CT	TT	TT	CC	CT	TT	CT	CT	CC	TT	CT	CC	CT	CC	CC	TT	CT	TT	CT	TT
Gm10_42092755	Gm10	42092755	17.15	C	0.316239	CC	CT	CT	CC	CT	CC	TT	CT	TT	CC	CT	CT	TT	CT	CT	TT	CT	CT	CT	CC	CC	CT	CT	TT	CT	TT	TT	CC	CT	TT	CT	CT	CC	TT	CT	CC	CT	CC	CC	TT	CT	TT	CT	TT
Gm10_41902749	Gm10	41902749	20.69	G	0.264957	GG	GA	GA	GG	GA	GA	AA	GA	AA	GG	GA	GA	AA	GA	GA	AA	GA	GA	GA	GG	GA	GA	GA	AA	GA	AA	AA	GG	GA	AA	GA	GA	GG	AA	GA	GG	GA	GG	GG	AA	GA	AA	GA	AA
Gm10_41840137	Gm10	41840137	20.91	G	0.260684	GG	GA	GA	GG	GA	GA	AA	GA	AA	GG	GA	GA	AA	GA	GA	AA	GA	GA	GA	GG	GA	GA	GA	AA	GA	AA	AA	GG	GA	AA	GA	GA	GG	AA	GA	GG	GA	GG	GG	AA	GA	AA	GA	AA
Gm10_41772387	Gm10	41772387	21.34	C	0.260684	CC	CT	CT	CC	CT	CT	TT	CT	TT	CC	CT	CT	TT	CT	CT	TT	CT	CT	CT	CC	CT	CT	CT	TT	CT	TT	TT	CC	CT	TT	CT	CT	CC	TT	CT	CC	CT	CC	CC	TT	CT	TT	CT	TT
Gm10_40513169	Gm10	40513169	28.58	C	0.269231	GG	CG	CG	GG	CG	CG	CC	CG	CG	GG	CG	GG	CC	CG	CG	CC	CG	CG	CG	GG	CG	CG	CG	CC	CC	CC	CC	GG	CG	CC	CG	CG	CG	CC	CG	GG	CG	GG	GG	CG	CG	CC	CG	CC
Gm10_40332649	Gm10	40332649	30.32	C	0.273504	TT	CT	CT	TT	CT	CT	CC	CT	CT	TT	CT	TT	CC	CT	CT	CC	CT	CT	CT	TT	CT	CT	CT	CC	CC	CC	CC	TT	CT	CC	CT	CT	CT	CC	CT	TT	CT	TT	TT	CT	CT	CC	CT	CC
Gm10_40332672	Gm10	40332672	30.75	T	0.273504	GG	TG	TG	GG	TG	TG	TT	TG	TG	GG	TG	GG	TT	TG	TG	TT	TG	TG	TG	GG	TG	TG	TG	TT	TT	TT	TT	GG	TG	TT	TG	TG	TG	TT	TG	GG	TG	GG	GG	TG	TG	TT	TG	TT
Gm10_40190715	Gm10	40190715	31.19	C	0.273504	TT	CT	CT	TT	CC	CT	CC	CT	CT	TT	CT	TT	CC	CT	CT	CC	CT	CT	CT	TT	CT	CT	CT	CC	CC	CC	CC	TT	CT	CC	CT	CT	CT	CC	CT	TT	CT	TT	TT	CT	CT	CC	CT	CC
Gm10_39966128	Gm10	39966128	33.6	C	0.269231	TT	CT	CT	TT	CC	CT	CC	CT	CT	TT	CT	TT	CC	CT	CT	CC	CT	CT	CT	TT	CT	CT	CT	CC	CC	CC	CC	TT	CT	CC	CT	CT	CT	CC	CT	TT	CT	TT	TT	CT	CT	CC	CT	CC
Gm10_39922426	Gm10	39922426	33.81	C	0.264957	TT	CT	CT	TT	CC	CT	CC	CT	CT	TT	CT	TT	CC	CT	CT	CC	CT	CT	CT	TT	CT	CT	CT	CC	CC	CC	CC	TT	CT	CC	CT	CT	CT	CC	CT	TT	CT	TT	TT	CT	CT	CC	CT	CC
Gm10_39821134	Gm10	39821134	34.68	G	0.260684	AA	GA	GA	AA	GG	GA	GG	GA	GA	AA	GA	AA	GG	GA	GA	GG	GA	GA	GA	AA	GA	GA	GA	GG	GA	GG	GG	AA	GA	GG	GA	GA	GA	GG	GA	AA	GA	GA	AA	GA	GA	GG	GA	GG
Gm10_38058098	Gm10	38058098	52.45	G	0.217949	GA	GA	GA	GA	GG	GA	AA	GA	GA	GG	GA	GG	GA	GG	AA	AA	GA	GG	AA	GG	GA	GA	GA	AA	GG	AA	AA	GA	GA	GA	GA	AA	GA	AA	GA	GG	GA	GA	GA	GA	GA	AA	GA	GG
Gm10_18253937	Gm10	18253937	62.2	G	0.235043	GA	GA	GG	GA	GG	GA	AA	GA	GA	AA	GA	GG	GA	GG	AA	AA	GG	GG	AA	GG	GA	AA	GA	GA	GG	AA	GA	GA	GA	GA	GA	AA	GG	AA	GA	GG	GG	GA	AA	GA	GA	AA	GA	GG
Gm10_10376597	Gm10	10376597	63.95	T	0.247863	TG	TG	TT	TG	TG	TG	GG	TG	TG	GG	TG	TT	TG	TT	GG	GG	TT	TT	GG	TT	TG	GG	TG	TG	TT	GG	TG	TG	TG	TG	TG	GG	TT	GG	TG	TT	TT	TG	GG	TG	TG	GG	TG	TT
Gm10_10376600	Gm10	10376600	64.17	T	0.24359	TC	TC	TT	TC	TC	TC	CC	TC	TC	CC	TC	TT	TC	TT	CC	CC	TT	TT	CC	TT	TC	CC	TC	TC	TT	CC	TC	TC	TC	TC	TC	CC	TT	CC	TC	TT	TT	TC	CC	TC	TC	CC	TC	TT
Gm10_11069611	Gm10	11069611	64.82	T	0.247863	TG	TG	TT	TG	TG	TG	GG	TG	TG	GG	TG	TT	TG	TT	GG	GG	TT	TT	GG	TT	TG	GG	TG	TG	TT	GG	TG	TG	TG	TG	TG	GG	TT	GG	TG	TT	TT	TG	GG	TG	TG	GG	TG	TT
Gm10_11069624	Gm10	11069624	65.04	A	0.24359	AC	AC	AA	AC	AC	AC	CC	AC	AC	CC	AC	AA	AC	AA	CC	CC	AA	AA	CC	AA	AC	CC	AC	AC	AA	CC	AC	AC	AC	AC	AC	CC	AA	CC	AC	AA	AA	AC	CC	AC	AC	CC	AC	AA
Gm10_11190378	Gm10	11190378	65.47	G	0.24359	GA	GA	GG	GA	GA	GA	AA	GA	GA	AA	GA	GG	GA	GG	AA	AA	GG	GG	AA	GG	GA	AA	GA	GA	GG	AA	GA	GA	GA	GA	GA	AA	GG	AA	GA	GG	GG	GA	AA	GA	GA	AA	GA	GG
Gm10_11190429	Gm10	11190429	65.91	G	0.24359	GA	GA	GG	GA	GA	GA	AA	GA	GA	AA	GA	GG	GA	GG	AA	AA	GG	GG	AA	GG	GA	AA	GA	GA	GG	AA	GA	GA	GA	GA	GA	AA	GG	AA	GA	GG	GG	GA	AA	GA	GA	AA	GA	GG
Gm10_11019482	Gm10	11019482	66.56	A	0.252137	AC	AC	AA	AC	AC	AC	CC	AC	AC	CC	AC	AA	AC	AA	CC	CC	AA	AA	CC	AA	AC	CC	AC	AC	AA	CC	AC	AC	AC	AC	AC	CC	AA	CC	AC	AA	AA	AC	CC	AC	AC	CC	AC	AA
Gm10_11019507	Gm10	11019507	66.77	G	0.247863	GA	GA	GG	GA	GA	GA	AA	GA	GA	AA	GA	GG	GA	GG	AA	AA	GG	GG	AA	GG	GA	AA	GA	GA	GG	AA	GA	GA	GA	GA	GA	AA	GG	AA	GA	GG	GG	GA	AA	GA	GA	AA	GA	GG
Gm10_10026407	Gm10	10026407	66.99	A	0.24359	AG	AG	AA	AG	AG	AG	GG	AG	AG	GG	AG	AA	AG	AA	GG	GG	AA	AA	GG	AA	AG	GG	AG	AG	AA	GG	AG	AG	AG	AG	AG	GG	AA	GG	AG	AA	AA	AG	GG	AG	AG	GG	AG	AA
Gm10_7708333	Gm10	7708333	69.41	G	0.230769	GA	GA	GG	GA	GA	GA	AA	GA	GA	AA	GA	GA	GA	GG	AA	AA	GG	GG	AA	GG	GA	AA	GA	GA	GG	AA	GA	GA	GA	GA	GA	AA	GG	AA	GA	GG	GG	GA	AA	GA	GA	AA	GA	GG
Gm10_6446365	Gm10	6446365	74.56	A	0.24359	AT	AT	AA	AT	AT	AT	TT	AT	AT	AT	AT	AT	AT	AA	TT	TT	AA	AA	TT	AA	AT	TT	AT	AT	AA	AT	AT	AT	AT	AT	AA	TT	AA	TT	AT	AA	AA	AT	TT	AT	AT	TT	AT	AA
Gm10_6170899	Gm10	6170899	77.2	G	0.25641	GC	GC	GG	GC	GC	GC	CC	GC	CC	GC	GC	GC	GC	GG	CC	CC	GG	GG	CC	GG	GC	CC	CC	GC	GG	GC	GC	GC	GC	GC	GG	CC	GG	CC	GC	GG	GG	GC	CC	GC	GC	CC	GC	GG
Gm10_5353662	Gm10	5353662	83.5	T	0.260684	TC	TC	CC	TC	TC	TC	TT	TC	TT	TC	TC	TC	TC	CC	TT	TT	TC	CC	TT	CC	TT	TT	TT	TC	CC	TC	TC	TC	TC	TC	CC	TT	CC	TT	TC	CC	CC	TC	TC	TC	TC	TT	TC	CC
Gm10_5078332	Gm10	5078332	87.04	T	0.247863	TA	TA	AA	TA	TA	TA	TT	TA	TT	TA	TA	TA	TA	AA	TT	TT	TA	AA	TT	AA	TT	TT	TT	TA	AA	TA	TA	TA	TA	TA	AA	TT	AA	TT	TA	AA	AA	TA	TA	TA	TA	TT	TA	AA
Gm10_5078373	Gm10	5078373	87.25	A	0.247863	AG	AG	GG	AG	AG	AG	AA	AG	AA	AG	AG	AG	AG	GG	AA	AA	AG	GG	AA	GG	AA	AA	AA	AG	GG	AG	AG	AG	AG	AG	GG	AA	GG	AA	AG	GG	GG	AG	AG	AG	AG	AA	AG	GG
Gm10_4926864	Gm10	4926864	89.44	A	0.239316	AG	AG	GG	AG	AG	AG	AA	AG	AA	AG	AG	AG	AG	GG	AA	AA	AG	GG	AA	GG	AA	AA	AA	AG	GG	AG	AG	AG	AG	AG	GG	AA	GG	AA	AG	GG	GG	AG	AG	AG	AG	AA	AG	AG
Gm10_4480547	Gm10	4480547	92.08	G	0.247863	GC	GC	CC	GC	GC	GC	GG	GC	GG	GC	GC	GC	GC	CC	GG	GG	GC	CC	GG	CC	GG	GG	GG	GC	CC	GC	GC	GC	GC	GC	CC	GG	CC	GG	GC	CC	CC	GC	GC	GC	GC	GG	GG	GC
Gm10_4038718	Gm10	4038718	96.3	C	0.286325	TT	CT	TT	CT	CT	CT	CC	CT	CC	CT	TT	CT	CT	TT	CC	CC	CT	TT	CC	TT	CC	CC	CC	CT	TT	CT	CT	CT	CT	TT	TT	CC	TT	CC	CT	TT	TT	CT	CT	CT	CT	CC	CC	CT
Gm10_3977160	Gm10	3977160	96.73	C	0.286325	GG	CG	GG	CG	CG	CG	CC	CG	CC	CG	GG	CG	CG	GG	CC	CC	CG	GG	CC	GG	CC	CC	CC	CG	GG	CG	CG	CG	CG	GG	GG	CC	GG	CC	CG	GG	GG	CG	CG	CG	CG	CC	CC	CG
Gm10_4109270	Gm10	4109270	97.6	T	0.277778	AA	TA	AA	TA	TA	TA	TT	TA	TT	TA	AA	TA	TA	AA	TT	TT	TA	AA	TT	AA	TT	TT	TT	TA	AA	TA	TA	TA	TA	TA	AA	TT	AA	TT	TA	AA	AA	TA	TA	TA	TA	TT	TT	TA
Gm10_4757948	Gm10	4757948	102.28	C	0.24359	CT	CT	TT	CT	CT	CT	CC	CT	CC	CT	CT	CT	CT	TT	CC	CC	CT	TT	CC	TT	CC	CC	CC	CT	TT	CT	CT	CT	CT	CT	TT	CC	TT	CC	CT	TT	TT	CT	CT	CT	CT	CC	CC	CT
Gm10_4618221	Gm10	4618221	106.05	C	0.273504	CC	CT	TT	CT	CT	CT	CC	CT	CC	CT	CT	CT	CT	TT	CC	CC	CC	TT	CC	TT	CC	CC	CC	CT	TT	CT	CT	CT	CT	CT	TT	CC	TT	CC	CT	TT	TT	CT	CT	CT	CT	CC	CC	CT
Gm10_4618219	Gm10	4618219	106.93	A	0.269231	AA	AG	GG	AG	AG	AG	AA	AG	AA	AG	AG	AG	AG	GG	AA	AA	AA	GG	AA	GG	AA	AA	AA	AG	GG	AG	AG	AG	AG	AG	GG	AA	GG	AA	AG	GG	GG	AG	AG	AG	AG	AA	AA	AG
Gm10_4618169	Gm10	4618169	109.34	C	0.24359	CT	CT	TT	CT	CT	CT	CC	CT	CC	CT	CT	CT	CT	TT	CC	CC	CT	TT	CC	TT	CC	CC	CC	CT	TT	CT	CT	CT	CT	CT	TT	CC	TT	CC	CT	TT	TT	CT	CT	CT	CT	CC	CC	CT
Gm10_4985095	Gm10	4985095	115.16	T	0.290598	TC	TC	CC	TC	TT	TC	TT	TC	TT	TC	TC	TT	TC	CC	TT	TT	TC	CC	TT	CC	TT	TT	TT	TC	CC	TC	TC	TC	TC	TC	CC	TT	CC	TT	TC	CC	CC	TC	TT	TT	TC	TT	TC	TC
Gm10_4985056	Gm10	4985056	117.35	A	0.299145	AG	AG	GG	AG	AA	AG	AA	AA	AA	AG	AG	AA	AG	GG	AA	AA	AG	GG	AA	GG	AA	AA	AA	AG	GG	AG	AG	AG	AG	AG	GG	AA	GG	AA	AG	GG	GG	AG	AA	AA	AG	AA	AG	AG
Gm10_4985026	Gm10	4985026	120.43	C	0.333333	CT	CT	TT	CT	CC	CC	CC	CC	CC	CT	CT	CC	CT	TT	CC	CC	CT	TT	CC	TT	CC	CC	CC	CT	TT	CT	CT	CT	CT	CT	TT	CC	TT	CC	CT	TT	TT	CT	CC	CC	CT	CC	CT	CT
Gm10_5130578	Gm10	5130578	133.97	T	0.324786	TA	TA	AA	TA	TA	TA	TT	TA	TT	TT	TA	TT	TA	AA	TT	TT	TA	AA	TT	TT	TT	TT	TT	TA	AA	TA	TA	TA	TA	TA	AA	TT	AA	TT	TA	TT	TT	TA	TT	TA	TA	TT	TA	TT
Gm10_5594771	Gm10	5594771	136.37	C	0.324786	CT	CT	TT	CT	CT	CT	CC	CT	CC	CC	CT	CC	CT	TT	CC	CC	TT	TT	CC	CC	CC	CC	CC	CT	TT	CT	CT	CT	CT	CT	TT	CC	TT	CC	CT	CC	CC	CT	CC	CT	CT	CC	CT	CC
Gm10_5541228	Gm10	5541228	136.59	C	0.320513	CT	CT	TT	CT	CT	CT	CC	CT	CC	CC	CT	CC	CT	TT	CC	CC	TT	TT	CC	CC	CC	CC	CC	CT	TT	CT	CT	CT	CT	CT	TT	CC	TT	CC	CT	CC	CC	CT	CC	CT	CT	CC	CT	CC
Gm10_5788068	Gm10	5788068	137.46	T	0.324786	TC	TC	CC	TC	TC	TC	TT	TC	TT	TT	TC	TT	TC	CC	TT	TT	CC	CC	TT	TT	TT	TT	TT	TC	CC	TC	TC	TC	TC	TC	CC	TT	CC	TT	TC	TT	TT	TC	TT	TC	TC	TT	TC	TT
Gm10_6227719	Gm10	6227719	140.09	T	0.311966	TC	TC	TT	TC	TC	TC	CC	TC	CC	CC	TC	CC	TC	TT	CC	CC	TT	TT	CC	CC	TC	CC	CC	TC	TT	TC	TC	TC	TC	TC	TT	CC	TT	CC	TC	CC	CC	TC	CC	TC	TC	CC	TC	CC
Gm10_12934487	Gm10	12934487	148.77	G	0.320513	GT	GT	TT	GT	GT	GT	GG	GT	GT	GG	GT	GG	GT	TT	GG	GG	TT	TT	GG	GG	GT	GG	GT	GT	TT	GG	GT	GT	GT	GT	GT	GG	TT	GG	GT	GG	GG	GT	GG	GT	GT	GG	GT	GG
Gm10_20138607	Gm10	20138607	149.64	C	0.320513	CT	CT	TT	CT	TT	CT	CC	CT	CT	CC	CT	CC	CT	TT	CC	CC	TT	TT	CC	CC	CT	CC	CT	CT	TT	CC	CT	CT	CT	CT	CT	CC	TT	CC	CT	CC	CC	CT	CC	CT	CT	CC	CT	CC
Gm10_11399933	Gm10	11399933	150.95	T	0.320513	TA	TA	AA	TA	TA	TA	TT	TA	TA	TT	TA	TT	TA	AA	TT	TT	AA	AA	TT	TT	TA	TT	TA	TA	AA	TT	TA	TA	TA	TA	TA	TT	AA	TT	TA	TT	TT	TA	TT	TA	TA	TT	TA	TT
Gm10_424552	Gm10	424552	197.52	C	0.324786	CA	CA	AA	CA	CC	CC	CC	AA	CA	CA	AA	CC	CA	AA	CC	CA	CC	AA	CC	CC	CC	CA	CA	AA	AA	CA	CC	CC	CA	AA	AA	CC	AA	CC	CC	CC	CC	CA	CC	CC	CC	CA	CC	CA
Gm10_147825	Gm10	147825	200.6	C	0.282051	CT	CT	TT	CT	CC	CC	CC	TT	CT	CT	TT	CC	CT	TT	CT	CT	CC	TT	CC	CC	CC	CT	CT	TT	TT	CT	CC	CC	CT	TT	TT	CC	TT	CT	CC	CT	TT	CT	CC	CC	CC	CT	CC	CT
Gm10_10780	Gm10	10780	202.14	C	0.299145	CT	CT	TT	CT	CC	CC	CC	TT	CT	CT	TT	CC	CT	TT	CT	CT	CC	TT	CC	CC	CC	CT	CT	TT	TT	CT	CC	CC	TT	TT	TT	CC	TT	CT	CC	CT	TT	CT	CC	CC	CC	CT	CC	CT
Gm10_10831	Gm10	10831	203.45	T	0.320513	TC	TC	CC	TC	TT	TT	TT	CC	TC	TC	CC	TT	TC	CC	TT	TC	TT	CC	TT	TT	TT	TC	TC	CC	CC	TC	TT	TT	TC	CC	CC	TT	CC	TC	TT	TC	CC	TC	TT	TT	TT	TC	TT	TC
Gm11_1681386	Gm11	1681386	0	G	0.264957	AA	AA	AA	GA	GG	AA	AA	GA	GG	GA	GA	GG	GA	GA	GA	GG	GA	AA	GG	GA	AA	GA	GG	GA	GG	GA	GA	GG	GA	GA	GA	GA	GA	GG	AA	AA	GG	AA	AA	GA	GA	AA	AA	GA
Gm11_1681387	Gm11	1681387	0.22	G	0.264957	AA	AA	AA	GA	GG	AA	AA	GA	GG	GA	GA	GG	GA	GA	GA	GG	GA	AA	GG	GA	AA	GA	GG	GA	GG	GA	GA	GG	GA	GA	GA	GA	GA	GG	AA	AA	GG	AA	AA	GA	GA	AA	AA	GA
Gm11_1681369	Gm11	1681369	0.44	G	0.264957	AA	AA	AA	GA	GG	AA	AA	GA	GG	GA	GA	GG	GA	GA	GA	GG	GA	AA	GG	GA	AA	GA	GG	GA	GG	GA	GA	GG	GA	GA	GA	GA	GA	GG	AA	AA	GG	AA	AA	GA	GA	AA	AA	GA
Gm11_1742317	Gm11	1742317	0.65	T	0.264957	AA	AA	AA	TA	TT	AA	AA	TA	TT	TA	TA	TT	TA	TA	TA	TT	TA	AA	TT	TA	AA	TA	TT	TA	TT	TA	TA	TT	TA	TA	TA	TA	TA	TT	AA	AA	TT	AA	AA	TA	TA	AA	AA	TA
Gm11_466971	Gm11	466971	8.36	C	0.273504	TT	CT	TT	CT	CC	TT	TT	CT	CC	CT	CT	CC	CT	CT	CT	CC	TT	TT	CC	CT	TT	CT	CC	CT	CC	TT	CT	CC	CT	CT	CT	CT	CT	CC	TT	TT	CC	TT	TT	CT	CT	TT	TT	CT
Gm11_12365	Gm11	12365	9.01	G	0.269231	AA	GA	AA	GA	GG	AA	AA	GA	GG	GA	GA	GG	GA	GA	GA	GG	AA	AA	GG	GA	AA	GA	GG	GA	GG	AA	GA	GG	GA	GA	GA	GA	GA	GG	AA	AA	GG	AA	AA	GA	GA	AA	AA	GA
Gm11_622140	Gm11	622140	15.3	A	0.294872	GG	AG	GG	AG	AA	GG	GG	AG	AA	AG	AG	AA	AG	AG	AA	AA	GG	GG	AA	AA	GG	AG	AA	AG	AA	AG	AG	AA	AG	AG	AG	AG	AG	AA	GG	AA	AA	GG	AA	AG	AG	GG	GG	AG
Gm11_1355856	Gm11	1355856	19.48	T	0.307692	CC	CC	CC	TC	TT	CC	CC	TC	TT	TC	TC	TT	TC	TC	TT	TT	TC	CC	TT	TT	CC	TC	TT	TC	TT	TC	TC	TT	TC	TC	TC	TC	TC	TT	CC	TT	TT	CC	TT	TC	TC	CC	CC	TC
Gm11_1404064	Gm11	1404064	20.13	A	0.320513	TT	TT	TT	AT	AA	TT	TT	AT	AA	AT	AT	AA	AT	AT	AA	AA	AT	TT	AA	AA	TT	AT	AA	AT	AA	AT	AT	AA	AT	AT	AT	AT	AT	AA	TT	AA	AA	TT	AA	AT	AT	TT	TT	AT
Gm11_1404093	Gm11	1404093	20.56	T	0.311966	CC	CC	CC	TC	TT	CC	CC	TC	TT	TC	TC	TT	TC	TC	TT	TT	TC	CC	TT	TT	CC	TC	TT	TC	TT	TC	TC	TT	TC	TC	TC	TC	TC	TT	CC	TT	TT	CC	TT	TC	TC	CC	CC	TC
Gm11_2021520	Gm11	2021520	25.45	T	0.320513	TT	TT	TT	TC	CC	TT	TT	TC	CC	TC	TC	CC	TC	TC	CC	CC	TC	TT	CC	CC	TT	TC	CC	TC	CC	TC	TC	CC	TC	TC	TC	TC	TT	CC	TT	CC	CC	TT	CC	TC	TC	TT	TT	TC
Gm11_2150650	Gm11	2150650	26.1	G	0.320513	GG	GG	GG	GT	TT	GG	GG	GT	TT	GT	GT	TT	GT	GT	TT	TT	GT	GG	TT	TT	GG	GT	TT	GT	TT	GT	GT	TT	GT	GT	GT	GT	GG	TT	GG	TT	TT	GG	TT	GT	GT	GG	GG	GT
Gm11_2917713	Gm11	2917713	31.68	G	0.277778	GG	GG	GG	GC	GG	GG	GG	GC	CC	GC	GC	CC	GC	GC	CC	CC	GC	GG	CC	CC	GG	GC	CC	GC	CC	GC	GC	CC	GC	GC	GC	GC	GG	CC	GG	CC	CC	GG	CC	GC	GC	GG	GG	GC
Gm11_3085494	Gm11	3085494	33.65	C	0.273504	CC	CC	CC	CT	CC	CT	CC	CT	TT	CT	CT	TT	CT	TT	TT	TT	CT	CC	TT	TT	CC	CT	TT	CT	TT	CT	CT	TT	CT	CT	CT	CT	CC	TT	CC	TT	TT	CC	TT	CT	CT	CC	CC	CT
Gm11_3398968	Gm11	3398968	36.28	A	0.286325	AA	AA	AA	AT	AA	AT	AA	AT	TT	AT	AT	TT	AT	TT	TT	TT	AT	AA	TT	TT	AT	AT	TT	AT	TT	AT	AT	TT	AT	AT	AT	AT	AA	TT	AA	TT	TT	AA	TT	AT	AT	AA	AA	AT
Gm11_3398923	Gm11	3398923	36.5	A	0.286325	AA	AA	AA	AG	AA	AG	AA	AG	GG	AG	AG	GG	AG	GG	GG	GG	AG	AA	GG	GG	AG	AG	GG	AG	GG	AG	AG	GG	AG	AG	AG	AG	AA	GG	AA	GG	GG	AA	GG	AG	AG	AA	AA	AG
Gm11_3684400	Gm11	3684400	39.13	A	0.277778	AA	AA	AA	AG	AA	AG	AA	AG	GG	AG	AG	GG	AG	GG	GG	GG	AG	AA	GG	GG	AG	AG	GG	AG	GG	AG	AG	GG	GG	AG	AG	AG	AA	GG	AA	GG	GG	AA	GG	AG	AG	AA	AG	AG
Gm11_4585610	Gm11	4585610	43.8	G	0.290598	AA	AA	AA	GA	AA	GA	AA	GA	GG	GA	GA	GG	GA	GG	GG	GG	GG	AA	GG	GG	GA	GA	GG	GA	GG	GA	GA	GG	GG	GA	GA	GA	AA	GG	AA	GG	GG	AA	GG	GA	GA	AA	GA	GA
Gm11_5105160	Gm11	5105160	46.65	A	0.299145	AG	GG	GG	AG	GG	AG	GG	AG	AA	AG	AG	AA	AG	AA	AA	AG	AA	GG	AA	AA	AG	AG	AA	AA	AA	AG	AG	AA	AA	AG	AG	AG	GG	AA	GG	AA	AA	GG	AA	AG	AG	GG	AG	AG
Gm11_5535938	Gm11	5535938	48.83	G	0.299145	GA	AA	GA	GA	AA	GA	AA	GA	GG	GA	GA	GG	GA	GG	GG	GA	GG	AA	GG	GG	GA	GA	GG	GG	GG	GA	GA	GA	GG	GA	GA	GA	AA	GG	AA	GG	GG	AA	GG	GA	GA	AA	GA	GA
Gm11_5535897	Gm11	5535897	49.05	C	0.303419	CG	GG	CG	CG	GG	CG	GG	CG	CC	CG	CG	CC	CG	CC	CC	CG	CC	GG	CC	CC	CG	CG	CC	CC	CC	CG	CG	CG	CC	CG	CG	CG	GG	CC	GG	CC	CC	GG	CC	CG	CG	GG	CG	CG
Gm11_5993853	Gm11	5993853	50.79	C	0.290598	CT	TT	CT	CT	TT	CT	TT	CT	CC	CT	CT	CC	CT	CC	CC	CT	CC	TT	CC	CC	CT	CT	CC	CC	CC	CT	CT	CT	CC	CT	CT	CT	TT	CC	TT	CC	CC	TT	CC	CT	CT	CT	CT	CT
Gm11_6106027	Gm11	6106027	51.45	A	0.290598	AG	GG	AG	AG	GG	AG	GG	AG	AA	AG	AG	AA	AG	AA	AA	AG	AA	GG	AA	AA	AG	AG	AA	AA	AA	AG	AG	GG	AA	AG	AG	AG	GG	AA	GG	AA	AA	GG	AA	AG	AG	AG	AG	AG
Gm11_6106037	Gm11	6106037	54.75	G	0.247863	GT	GG	GT	GT	GG	GT	GG	GT	TT	GT	GT	TT	GT	TT	GT	GT	TT	GG	TT	GT	GT	GT	TT	TT	TT	GT	GT	GG	TT	GT	GT	GT	GG	GT	GG	GG	GT	GG	TT	GT	GT	GT	GT	GT
Gm11_5993856	Gm11	5993856	55.19	G	0.24359	GA	GG	GA	GA	GG	GA	GG	GA	AA	GA	GA	AA	GA	AA	GA	GA	AA	GG	AA	GA	GA	GA	AA	AA	AA	GA	GA	GA	AA	GA	GA	GA	GG	GA	GG	GG	GA	GG	GA	GA	GA	GA	GA	GA
Gm11_5677476	Gm11	5677476	56.49	G	0.247863	GA	GG	GA	GA	GG	GA	GG	GA	AA	GA	GA	AA	GA	AA	GA	GA	AA	GG	AA	GA	GA	GA	AA	AA	AA	GA	GA	GA	AA	GA	GA	GA	GG	GA	GG	GG	GA	GG	GA	GA	GA	GA	GA	GA
Gm11_5345540	Gm11	5345540	58.24	A	0.239316	AG	AA	AG	AG	AA	AG	AA	AG	GG	AG	AG	GG	AG	GG	AG	AG	GG	AA	GG	AG	AG	AG	GG	GG	GG	AG	AG	AG	GG	AG	AG	AG	AA	AG	AA	AA	GG	AA	AG	AG	AG	AA	AG	AG
Gm11_5740838	Gm11	5740838	60.21	A	0.239316	AT	TT	AT	AT	TT	AT	TT	AT	AA	AT	AT	AA	AT	AA	AT	AT	AA	TT	AA	AT	AT	AT	AA	AA	AA	AT	AT	AT	AA	AT	AT	AT	TT	AT	TT	TT	AT	TT	AT	AT	AT	AT	AT	AT
Gm11_6484060	Gm11	6484060	63.07	T	0.235043	TA	TT	TA	TA	TT	TA	TT	TA	AA	TA	TA	AA	TA	AA	TA	TA	AA	TT	AA	TA	TA	TA	AA	AA	AA	TA	TA	TT	AA	TA	TA	TA	TT	TA	TT	TT	TA	TA	AA	TA	TA	TA	TA	TA
Gm11_6484045	Gm11	6484045	63.29	A	0.239316	AT	AA	AT	AT	AA	AT	AA	AT	TT	AT	AT	TT	AT	TT	AT	AT	TT	AA	TT	AT	AT	AT	TT	TT	TT	AT	AT	AA	TT	AT	AT	AT	AA	AT	AA	AA	AT	AT	TT	AT	AT	AT	AT	AT
Gm11_6484026	Gm11	6484026	63.51	T	0.24359	TA	TT	TA	TA	TT	TA	TT	TA	AA	TA	TA	AA	TA	AA	TA	TA	AA	TT	AA	TA	TA	TA	AA	AA	AA	TA	TA	TT	AA	TA	TA	TA	TT	TA	TT	TT	TA	TA	AA	TA	TA	TA	TA	TA
Gm11_7118413	Gm11	7118413	67.95	A	0.273504	AT	AA	AT	AT	AA	AT	AA	AT	TT	AT	AT	TT	AT	TT	AT	AT	TT	AA	TT	AT	AT	AT	AT	TT	TT	AT	AT	AA	TT	AT	AT	AT	AA	AT	AA	AA	AT	AT	TT	AT	AT	AT	AT	AT
Gm11_7118396	Gm11	7118396	68.38	G	0.282051	GT	GG	GT	GT	GG	GT	GG	GT	TT	GT	GT	TT	GT	TT	GT	GT	TT	GG	TT	GT	GT	GT	GT	TT	TT	GT	GT	GG	TT	GT	GT	GT	GG	GT	GG	GG	GT	GT	TT	GT	GT	GT	GT	GT
Gm11_7234154	Gm11	7234154	69.25	G	0.269231	GA	GG	GA	GA	GG	GA	GG	GA	AA	GA	GA	AA	GA	AA	GA	GA	AA	GG	AA	GA	GA	GA	GA	AA	AA	GA	GA	GG	AA	GA	GA	GA	GG	GA	GG	GG	GA	GA	AA	GA	GA	GA	GA	GA
Gm11_7667751	Gm11	7667751	73.01	G	0.273504	GA	GG	GA	GA	GG	GA	GG	GA	AA	GA	GA	AA	GA	AA	GA	GA	AA	GG	AA	AA	GA	GA	GA	AA	AA	GA	GA	GG	AA	GA	AA	GA	GA	AA	GG	GG	GA	GA	AA	AA	GA	GA	GA	GA
Gm11_7879389	Gm11	7879389	73.23	A	0.277778	AG	AA	AG	AG	AA	AG	AA	AG	GG	AG	AG	GG	AG	GG	AG	AG	GG	AA	GG	GG	AG	AG	AA	GG	GG	AG	AG	AA	GG	AG	GG	AG	AG	GG	AA	AA	AG	AG	GG	GG	AG	AG	AG	AG
Gm11_9942699	Gm11	9942699	87.76	C	0.286325	CT	CT	CT	CT	CC	CT	CC	CT	TT	CT	CT	CT	CT	TT	TT	CT	TT	CC	CT	TT	CT	TT	CC	TT	CT	CC	CT	CC	TT	CT	TT	CT	CT	TT	CC	CC	CT	CT	TT	TT	CT	TT	CT	CT
Gm11_10535154	Gm11	10535154	91.74	G	0.290598	GC	GC	CC	GC	GG	GC	GG	GC	CC	GC	GC	GC	GC	GC	CC	GC	CC	GG	GC	CC	GC	GC	GG	CC	GC	GG	GC	GG	CC	GC	CC	GC	GC	CC	GG	GG	GC	GC	CC	CC	GC	CC	GC	GC
Gm11_20047105	Gm11	20047105	135.36	A	0.294872	GG	AG	AG	GG	AG	AA	AG	AG	AG	GG	AG	AG	AG	AG	AG	GG	AA	AG	GG	AA	GG	AG	GG	AA	AG	GG	AA	AG	AG	AG	AG	AA	AG	AA	AG	GG	GG	GG	AA	AA	AG	AG	AG	GG
Gm11_29946788	Gm11	29946788	138.67	T	0.277778	CC	TC	TC	CC	TC	TT	TC	TC	TC	CC	TC	TC	TC	TC	TC	CC	TT	TC	CC	TT	CC	TC	CC	TT	TC	CC	TT	TC	TC	TC	TC	TT	TC	TT	TC	CC	CC	CC	TT	TT	TC	TC	TC	CC
Gm11_31069119	Gm11	31069119	143.57	G	0.282051	CC	GC	GC	GG	GC	GG	GC	GC	GC	CC	GC	CC	GC	GC	GC	CC	GG	GC	CC	GG	CC	GC	CC	GG	GC	CC	GG	GC	GC	GC	GC	GG	GC	GG	GC	CC	CC	CC	GC	GG	CC	GC	GC	CC
Gm11_32772879	Gm11	32772879	164.65	C	0.303419	CC	CT	CT	TT	CC	CT	CT	CT	CT	CT	CT	CC	CT	CC	TT	CC	TT	CT	CC	TT	CC	TT	CC	TT	CT	CC	TT	CT	CT	CT	CT	TT	CT	TT	CC	CC	CT	CC	CT	CT	CC	CT	CT	CT
Gm11_32772898	Gm11	32772898	165.75	C	0.303419	TT	CT	CT	CC	TT	CT	CT	CT	CT	CT	CT	TT	CT	TT	CT	TT	CC	CT	TT	CC	TT	CC	TT	CC	CT	TT	CC	CT	CT	CT	CT	CC	CT	CC	TT	TT	CT	TT	CT	CT	TT	CT	CT	CT
Gm11_32772852	Gm11	32772852	166.62	C	0.290598	CC	CT	CT	TT	CC	CT	CT	CT	CT	CT	CT	CC	CT	CC	CT	CC	TT	CT	CC	TT	CC	TT	CC	TT	CT	CC	TT	CT	CT	CT	CT	TT	CT	TT	CC	CC	CT	CC	CT	CT	CC	CT	CT	CT
Gm11_33719863	Gm11	33719863	174.85	C	0.282051	CC	CA	CA	AA	CC	CA	CA	CC	AA	CA	CA	CC	CA	CC	CC	CA	AA	CA	CC	AA	CA	AA	CC	AA	CA	CC	AA	CA	CA	CA	CC	AA	CA	AA	CA	CC	CA	CC	CA	CA	CC	CA	CA	CA
Gm11_33803616	Gm11	33803616	175.5	T	0.286325	TT	TC	TC	CC	TT	TC	TC	TT	CC	TC	TC	TT	TC	TT	TT	TC	CC	TC	TT	CC	TC	CC	TT	CC	TC	TT	CC	TC	TC	TC	TT	CC	TC	CC	TC	TT	TC	TT	TC	TC	TT	TC	TC	TC
Gm11_34096180	Gm11	34096180	179.7	T	0.277778	TT	TC	TC	CC	TT	TC	TC	TT	CC	TC	TT	TT	TC	TT	TT	TC	TC	TC	TT	CC	TC	CC	TT	CC	TC	TT	CC	TC	TC	TC	TT	CC	TC	CC	TC	TT	TC	TT	TC	TC	TT	TC	TC	TC
Gm11_34354205	Gm11	34354205	183.24	C	0.273504	AA	CA	CA	CC	AA	CA	CA	AA	CC	CA	AA	AA	CA	AA	AA	CA	CA	CA	CA	CC	CA	CC	AA	CC	CA	CA	CA	CA	AA	CA	AA	CC	CA	CC	CA	AA	CA	CA	CA	CA	AA	CA	CA	CA
Gm11_34569695	Gm11	34569695	186.54	G	0.273504	TT	TT	GT	GG	TT	GT	GT	TT	GG	GT	TT	TT	GT	TT	TT	GT	GT	GT	GT	GT	GT	GG	TT	GG	GT	GT	GT	GT	TT	GT	TT	GG	GT	GG	GT	TT	GG	GT	GT	GT	TT	GT	GT	GT
Gm11_34667973	Gm11	34667973	186.76	C	0.277778	TT	TT	CT	CC	TT	CT	CT	TT	CC	CT	TT	TT	CT	TT	TT	CT	CT	CT	CT	CT	CT	CC	TT	CC	CT	CT	CT	CT	TT	CT	TT	CC	CT	CC	CT	TT	CC	CT	CT	CT	TT	CT	CT	CT
Gm11_34569684	Gm11	34569684	187.19	G	0.277778	CC	CC	GC	GG	CC	GC	GC	CC	GG	GC	CC	CC	GC	CC	CC	GC	GC	GC	GC	GC	GC	GG	CC	GG	GC	GC	GC	GC	CC	GC	CC	GG	GC	GG	GC	CC	GG	GC	GC	GC	CC	GC	GC	GC
Gm12_143645	Gm12	143645	0	G	0.260684	GA	GG	GA	GA	AA	GA	AA	GA	GA	GA	GA	GA	GA	AA	GG	GA	GA	GA	AA	GA	GG	GA	AA	GA	GG	GA	GA	GG	AA	AA	GA	GA	AA	AA	AA	AA	GA	GA	GA	AA	AA	GA	GA	GA
Gm12_1327877	Gm12	1327877	6.03	T	0.260684	TC	CC	TC	TC	TT	TC	TT	TC	TC	TC	TC	TC	TC	TT	TC	TC	TC	TC	TT	TC	CC	TC	TT	TC	CC	TC	TC	CC	TT	TT	TC	TC	TT	TT	TT	TT	TC	TC	TC	TT	TT	TC	TC	TC
Gm12_3781260	Gm12	3781260	28.41	A	0.264957	AT	TT	AA	TT	AA	AT	AA	AT	AT	AA	AT	TT	AT	AA	AT	AT	AA	AT	AA	AT	TT	AA	AA	AT	TT	AT	AT	TT	AA	TT	AT	AT	AA	AA	AA	AA	AT	AT	AT	AA	AA	AT	AT	AT
Gm12_4023088	Gm12	4023088	28.85	A	0.269231	AC	CC	AA	CC	AA	AA	AA	AC	AC	AA	AC	CC	AC	AA	AC	AC	AA	AC	AA	AC	CC	AA	AA	AC	CC	AC	AC	CC	AA	CC	AC	AC	AA	AA	AA	AA	AC	AC	AC	AA	AA	AC	AC	AC
Gm12_4191521	Gm12	4191521	34.21	C	0.294872	CA	CC	AA	CC	AA	AA	AA	CC	CA	AA	CA	CC	CA	AA	CC	CA	AA	CA	AA	CC	CC	AA	AA	CA	CC	CA	CA	CC	AA	CC	CA	CA	AA	CC	AA	CC	CC	CA	CC	AA	AA	CA	CA	CA
Gm12_4191477	Gm12	4191477	34.86	G	0.294872	GA	GG	AA	GG	AA	AA	AA	GG	GA	AA	GA	GG	GA	AA	GG	GA	AA	GA	AA	GG	GG	AA	AA	GA	GG	GA	GA	GG	AA	GG	GA	GA	AA	GG	AA	GG	GG	GA	GG	GG	AA	GA	GA	GA
Gm12_4157517	Gm12	4157517	35.73	G	0.299145	GA	GG	AA	GG	AA	AA	AA	GG	GA	AA	GA	GG	GA	AA	GG	GA	AA	GA	AA	GG	GG	AA	AA	GA	GG	GA	GA	GG	AA	GG	GA	GA	AA	GG	AA	GG	GG	GA	GG	AA	AA	GA	GA	GA
Gm12_4157549	Gm12	4157549	35.95	C	0.294872	CT	CC	TT	CC	TT	TT	TT	CC	CT	TT	CT	CC	CT	TT	CC	CT	TT	CT	TT	CC	CC	TT	TT	CT	CC	CT	CT	CC	TT	CC	CT	CT	TT	CC	TT	CC	CC	CT	CC	TT	TT	CT	CT	CT
Gm12_4713246	Gm12	4713246	40.83	A	0.324786	AG	GG	AA	GG	AA	AA	AA	GG	AG	AA	AG	GG	AG	AA	GG	AG	AA	AG	AA	GG	GG	AG	AA	AG	GG	AG	AG	GG	AA	GG	AG	AG	AA	GG	AA	GG	GG	AG	GG	AA	AA	AG	AA	AG
Gm12_4855433	Gm12	4855433	42.36	A	0.316239	AC	CC	AA	CC	AC	AA	AA	CC	AC	AA	AC	CC	AC	AA	CC	AC	AA	AC	AA	CC	CC	AC	AA	AC	CC	AC	AC	CC	AA	CC	AC	AC	AA	CC	AA	CC	CC	AC	CC	AA	AA	AC	AA	AC
Gm12_5012936	Gm12	5012936	42.58	C	0.316239	CT	TT	CC	TT	CT	CC	CC	TT	CT	CC	CT	TT	CT	CC	TT	CT	CC	CT	CC	TT	TT	CT	CC	CT	TT	CT	CT	TT	CC	TT	CT	CT	CC	TT	CC	TT	TT	CT	TT	CC	CC	CT	CC	CT
Gm12_6073192	Gm12	6073192	53.38	C	0.311966	CT	CT	CT	TT	TT	CC	CC	TT	CT	CC	CT	TT	CT	CC	TT	TT	CT	CT	CT	TT	TT	CT	CC	CC	CT	TT	CT	CT	CC	TT	CT	CT	CT	TT	CC	TT	TT	CT	TT	CC	CC	CC	CC	CT
Gm12_6073211	Gm12	6073211	53.6	T	0.311966	TG	TG	TG	GG	GG	TT	TT	GG	TG	TT	TG	GG	TG	TT	GG	GG	TG	TG	TG	GG	GG	TG	TT	TT	TG	GG	TG	TG	TT	GG	TG	TG	TG	GG	TT	GG	GG	TG	GG	TT	TT	TT	TT	TG
Gm12_6211185	Gm12	6211185	54.03	A	0.316239	AG	AG	AG	GG	GG	AA	AA	GG	AG	AA	AG	GG	AG	AA	GG	GG	AG	AG	AG	GG	GG	AG	AA	AA	AG	GG	AG	AG	AA	GG	AG	AG	AG	GG	AA	GG	GG	AG	GG	AA	AA	AA	AA	AG
Gm12_6211126	Gm12	6211126	54.47	G	0.316239	GA	GA	GA	AA	AA	GG	GG	AA	GA	GG	GA	AA	GA	GG	AA	AA	GA	GA	GA	AA	AA	GA	GG	GG	GA	AA	GA	GA	GG	AA	GA	GA	GA	AA	GG	AA	AA	GA	AA	GG	GG	GG	GG	GA
Gm12_6295194	Gm12	6295194	55.34	C	0.311966	CT	CT	CT	TT	TT	CC	CT	TT	CT	CC	CT	TT	CT	CC	TT	TT	CT	CT	CT	TT	TT	CT	CC	CC	CT	TT	CT	CT	CC	TT	CT	CT	CT	TT	CC	TT	TT	CT	TT	CC	CC	CC	CC	CT
Gm12_6325536	Gm12	6325536	55.55	A	0.316239	AG	AG	AG	GG	GG	AA	AG	GG	AG	AA	AG	GG	AG	AA	GG	GG	AG	AG	AG	GG	GG	AG	AA	AA	AG	GG	AG	AG	AA	GG	AG	AG	AG	GG	AA	GG	GG	AG	GG	AA	AA	AA	AA	AG
Gm12_6395367	Gm12	6395367	55.77	A	0.320513	AG	AG	AG	GG	GG	AA	AG	GG	AG	AA	AG	GG	AG	AA	GG	GG	AG	AG	AG	GG	GG	AG	AA	AA	AG	GG	AG	AG	AA	GG	AG	AG	AG	GG	AA	GG	GG	AG	GG	AA	AA	AA	AA	AG
Gm12_6556497	Gm12	6556497	56.2	A	0.320513	AG	AG	AG	GG	GG	AA	AG	GG	AG	AA	AG	GG	AG	AA	GG	GG	AG	AG	AG	GG	GG	AG	AA	AA	AG	GG	AG	AG	AA	GG	AG	AG	AG	GG	AA	GG	GG	AG	GG	AA	AA	AA	AA	AG
Gm12_6877421	Gm12	6877421	59.5	C	0.311966	CG	CG	CG	CG	CC	GG	CG	CC	CG	GG	GG	CC	CG	GG	CC	CC	CG	CC	CG	CC	CC	CC	GG	GG	GG	CC	CG	CG	GG	CC	CG	CG	CG	CC	GG	CC	CC	CG	CC	GG	GG	GG	GG	CG
Gm12_6924892	Gm12	6924892	60.81	G	0.324786	GA	GA	GA	GA	GG	AA	GA	GG	GA	AA	AA	GG	GA	AA	GG	GG	GA	GG	GA	GG	GG	GG	AA	AA	AA	GG	GA	GA	AA	GG	GA	GA	GA	GG	AA	GG	GG	GA	GG	AA	AA	AA	AA	GA
Gm12_6924926	Gm12	6924926	61.24	A	0.324786	AG	AG	AG	AG	AA	GG	AG	AA	AG	GG	GG	AA	AG	GG	AA	AA	AG	AA	AA	AA	AA	AA	GG	GG	GG	AA	AG	AG	GG	AA	AG	AG	AG	AA	GG	AA	AA	AG	AA	GG	GG	GG	GG	AG
Gm12_6924941	Gm12	6924941	61.46	A	0.320513	AG	AG	AG	AG	AA	GG	AG	AA	AG	GG	GG	AA	AG	GG	AA	AA	AG	AA	AA	AA	AA	AA	GG	GG	GG	AA	AG	AG	GG	AA	AG	AG	AG	AA	GG	AA	AA	AG	AA	GG	GG	GG	GG	AG
Gm12_9162565	Gm12	9162565	76.24	C	0.290598	CT	CT	CT	CC	TT	CC	CT	CT	CT	CC	CC	CT	TT	CC	TT	CT	TT	TT	CT	CT	TT	CT	CC	CC	CC	CT	CT	CT	CT	TT	CT	CT	CT	CC	CC	CT	CT	CT	CT	CC	CC	CC	CC	CC
Gm12_11013270	Gm12	11013270	77.77	G	0.311966	GA	GA	GA	GG	AA	GG	GA	GA	GA	GG	GG	GA	AA	GG	AA	GA	AA	AA	GA	GA	AA	GA	GG	GG	GG	GA	GA	GA	GA	AA	GA	GA	GA	GG	GG	GA	GA	GA	GA	GG	GG	GG	GG	GG
Gm12_12732317	Gm12	12732317	79.52	A	0.311966	AG	AG	AG	AA	GG	AG	AG	AG	AG	AA	AA	AG	GG	AA	GG	AG	GG	GG	AG	AA	GG	AG	AA	AA	AA	AG	AG	AG	AG	GG	AG	AG	AG	AG	AA	AG	AG	AG	AG	AA	AA	AA	AA	AA
Gm12_12835390	Gm12	12835390	80.6	T	0.311966	TA	TA	TA	TT	AA	TA	TA	TA	TA	TT	TT	TA	AA	TT	AA	TA	AA	AA	TA	TT	AA	TA	TT	TT	TT	TA	TA	TA	TT	AA	TA	TA	TA	TA	TT	TA	TA	TA	TA	TT	TT	TT	TT	TT
Gm12_37558825	Gm12	37558825	136.37	T	0.290598	CC	TC	TT	TC	TC	TC	TC	CC	TT	TT	TT	CC	TT	CC	CC	TT	TC	CC	TC	CC	CC	TC	TC	TT	TT	TT	TC	TT	CC	CC	TT	TT	TT	CC	TC	CC	CC	CC	CC	TC	TC	TT	TT	CC
Gm13_44622919	Gm13	44622919	0	T	0.303419	TT	GG	TT	TG	TG	GG	TG	TT	GG	TT	GG	GG	GG	GG	GG	TG	TG	TG	TT	GG	GG	GG	TG	TT	GG	TG	GG	TT	TG	TG	TG	GG	TT	GG	TT	GG	GG	TG	GG	TT	TG	TT	TT	TT
Gm13_43246388	Gm13	43246388	14.49	T	0.277778	TT	CC	TT	TC	TC	CC	TC	TT	TC	TT	CC	TC	CC	CC	TT	TC	TC	TC	TC	CC	CC	CC	TC	TC	TC	TC	CC	TT	TT	TC	TC	CC	TT	TC	TT	TC	TC	TC	TC	TT	TT	TC	TT	TT
Gm13_42876699	Gm13	42876699	18.48	T	0.25641	TT	GG	TT	TG	TG	TG	TG	TT	TG	TT	GG	TG	GG	GG	TT	TG	TG	TG	GG	GG	GG	GG	TG	TG	TG	TG	GG	TT	TT	TG	TG	GG	TT	GG	TT	TG	TG	TG	TG	TT	TT	TG	TT	TG
Gm13_42784453	Gm13	42784453	20.22	A	0.264957	AA	GG	AA	AG	AG	AG	AG	AA	AG	AA	GG	AG	GG	GG	AA	AG	AG	AG	GG	GG	GG	GG	AG	AG	AG	AG	GG	AA	AA	AG	AG	GG	AA	GG	AA	AG	AG	AG	AG	AA	AA	AG	AA	AG
Gm13_42751347	Gm13	42751347	21.53	G	0.260684	GG	TT	GG	GT	GT	GT	GT	GG	GT	GG	TT	GT	TT	TT	GG	GT	GT	GT	TT	TT	TT	TT	GT	GT	GT	GT	TT	GG	GG	GT	GT	TT	GG	TT	GG	GT	GT	GT	GT	GG	GG	GT	GG	GT
Gm13_42657468	Gm13	42657468	27.1	G	0.324786	GG	AA	GG	GA	GA	GA	GA	GG	GA	GG	AA	GA	AA	AA	GG	GA	GA	GA	AA	AA	AA	AA	GG	GA	GA	GA	AA	GG	GG	GA	GA	AA	GG	AA	GG	GA	GA	GG	GG	GG	GG	GA	GG	GA
Gm13_42657498	Gm13	42657498	28.41	G	0.307692	GG	AA	GG	GA	GA	GA	GA	GG	GA	GG	AA	GA	AA	AA	GG	GA	GA	GA	AA	AA	AA	AA	GA	GA	GA	GA	AA	GG	GG	GA	GA	AA	GG	AA	GG	GA	GA	GG	GG	GG	GG	GA	GG	GA
Gm13_42657502	Gm13	42657502	29.06	C	0.311966	CC	TT	CC	CT	CT	CT	CT	CC	CT	CC	TT	CT	TT	TT	CC	CT	CT	CT	TT	TT	TT	TT	CT	CT	CT	CT	TT	CC	CC	CT	CT	TT	CC	TT	CC	CT	CT	CC	CC	CC	CC	CT	CC	CT
Gm13_42512245	Gm13	42512245	35.1	A	0.277778	AA	TT	AA	AT	AT	AT	AA	AA	AT	AA	TT	AT	TT	TT	AA	AT	AT	AT	TT	TT	TT	TT	AT	AT	AT	AT	TT	AA	AA	AT	AT	TT	AA	TT	AA	AT	AT	AT	AT	AA	AA	AT	AA	AT
Gm13_41688206	Gm13	41688206	48.06	G	0.32906	GG	CC	GG	CC	GC	GC	GC	GG	GC	GG	CC	CC	CC	CC	CC	GC	GC	GC	CC	CC	CC	CC	GC	GC	GC	GC	CC	GC	GG	CC	GC	CC	GG	CC	GC	CC	CC	GC	CC	GG	GG	GC	GG	CC
Gm13_41410970	Gm13	41410970	49.15	A	0.324786	AA	AG	AA	GG	AG	AG	AG	AA	AG	AA	GG	GG	GG	GG	GG	AG	AG	AG	GG	GG	GG	GG	AG	AG	AG	AG	GG	AG	AA	GG	AG	GG	AA	GG	AG	GG	GG	AG	GG	AA	AA	AG	AA	GG
Gm13_41325995	Gm13	41325995	49.8	G	0.333333	GG	GA	GG	AA	GA	GA	GA	GG	GA	GG	AA	AA	AA	AA	AA	GA	GA	GA	AA	AA	AA	AA	GA	GA	GA	GA	AA	GA	GG	AA	GA	AA	GG	AA	GA	AA	AA	GA	AA	GG	GG	GA	GG	AA
Gm13_41198486	Gm13	41198486	50.45	G	0.32906	GG	GA	GG	AA	GA	GA	GA	GG	GA	GG	AA	AA	AA	AA	AA	GA	GA	GA	AA	AA	AA	AA	GA	GA	GA	GA	AA	GA	GG	AA	GA	AA	GG	AA	GA	AA	AA	GA	AA	GG	GG	GA	GG	AA
Gm13_41056080	Gm13	41056080	50.89	A	0.324786	AA	AG	AA	GG	AG	AG	AG	AA	AG	AA	GG	GG	GG	GG	GG	AG	AG	AG	GG	GG	GG	GG	AG	AG	AG	AG	GG	AG	AA	GG	AG	GG	AA	GG	AG	GG	GG	AG	GG	AA	AA	AG	AA	GG
Gm13_40791955	Gm13	40791955	51.97	C	0.333333	TT	CT	TT	CC	CT	CT	CT	TT	CT	TT	CC	CC	CC	CC	CC	CT	CT	CT	CC	CC	CC	CC	CT	CT	CT	CT	CT	CT	TT	CC	CT	CC	TT	CC	CT	CC	CC	CC	CC	TT	TT	CT	TT	CC
Gm13_39716782	Gm13	39716782	56.61	A	0.316239	AA	AA	AA	GG	AG	AG	AG	AA	AG	AA	GG	GG	GG	GG	GG	AG	AG	AG	GG	GG	GG	GG	AG	AG	AG	AG	AG	AG	AA	GG	AG	AG	AA	GG	AG	GG	GG	GG	GG	AA	AA	AG	AA	GG
Gm13_39716794	Gm13	39716794	56.83	A	0.316239	AA	AA	AA	GG	AG	AG	AG	AA	AG	AA	GG	GG	GG	GG	GG	AG	AG	AG	GG	GG	GG	GG	AG	AG	AG	AG	AG	AG	AA	GG	AG	AG	AA	GG	AG	GG	GG	GG	GG	AA	AA	AG	AA	GG
Gm13_39615128	Gm13	39615128	57.91	G	0.320513	GG	GT	GG	TT	GT	GT	GT	GG	GT	GG	TT	TT	TT	TT	TT	GT	GT	GT	TT	TT	TT	TT	GT	GT	GT	GT	GT	GT	GG	TT	GT	GT	GG	TT	GT	TT	TT	TT	TT	GG	GG	GT	GG	TT
Gm13_39169433	Gm13	39169433	60.99	A	0.311966	AA	AT	AA	TT	AT	AT	AA	AA	AT	AA	TT	TT	TT	TT	TT	AT	AT	AT	TT	TT	TT	TT	AT	AT	AT	AT	AT	AT	AA	TT	AT	AT	AT	TT	AT	TT	TT	AT	TT	AA	AA	AT	AA	TT
Gm13_39169384	Gm13	39169384	61.21	G	0.311966	GG	GA	GG	AA	GA	GA	GG	GG	GA	GG	AA	AA	AA	AA	AA	GA	GA	GA	AA	AA	AA	AA	GA	GA	GA	GA	GA	GA	GG	AA	GA	GA	GA	AA	GA	AA	AA	GA	AA	GG	GG	GA	GG	AA
Gm13_38592744	Gm13	38592744	69.41	A	0.25641	AG	AG	AA	GG	AG	AG	AA	AA	AG	AA	GG	AG	GG	GG	AA	AG	AG	AG	GG	AG	AG	GG	AG	GG	AG	GG	AG	AG	AA	AG	AG	AG	AG	GG	AG	AG	AG	AG	AG	AA	AA	AG	AA	GG
Gm13_38422172	Gm13	38422172	70.72	G	0.273504	GA	GA	GG	AA	GA	GA	GG	GG	GA	GG	AA	GA	AA	AA	GG	GA	GA	GA	AA	GA	GA	AA	GA	AA	GA	AA	GA	GA	GG	AA	GA	GA	GA	AA	GA	GA	GA	GA	GA	GG	GG	GA	GG	AA
Gm13_37980286	Gm13	37980286	73.35	C	0.277778	CG	CG	GG	CC	CG	CG	GG	GG	CG	GG	CC	CG	CC	CC	GG	CG	CG	CG	CC	CG	CG	CC	CG	CG	CG	CC	CG	CG	GG	CC	CG	CG	CG	CC	CG	CG	CG	CG	CG	GG	GG	CG	GG	CC
Gm13_37933803	Gm13	37933803	73.78	A	0.273504	AG	AG	GG	AA	AG	AG	GG	GG	AG	GG	AA	AG	AA	AA	GG	AG	AG	AG	AA	AG	AG	AA	AG	AG	AG	AA	AG	AG	GG	AA	AG	AG	AG	AA	AG	AG	AG	AG	AG	GG	GG	AG	GG	AA
Gm13_37774478	Gm13	37774478	75.09	C	0.264957	CT	CT	TT	CC	CT	CT	TT	TT	CT	TT	CC	CT	CC	CC	TT	CT	CT	CT	CC	CT	CT	CC	CT	CT	CT	CC	CT	CT	TT	CC	CT	CT	CT	CC	CT	CT	CT	CT	CT	TT	TT	CT	TT	CC
Gm13_37683924	Gm13	37683924	75.31	C	0.269231	CT	CT	TT	CC	CT	CT	TT	TT	CT	TT	CC	CT	CC	CC	TT	CT	CT	CT	CC	CT	CT	CC	CT	CT	CT	CC	CT	CT	TT	CC	CT	CT	CT	CC	CT	CT	CT	CT	CT	TT	TT	CT	TT	CC
Gm13_37553006	Gm13	37553006	76.62	C	0.269231	CT	CT	TT	CC	CT	CT	TT	TT	CT	TT	CC	CT	CC	CC	TT	CT	CT	CT	CC	CT	CT	CC	CT	CT	CT	CC	CT	CT	TT	CC	CT	CT	CT	CC	CT	CT	CT	CT	CT	TT	TT	CT	TT	CC
Gm13_37276136	Gm13	37276136	78.14	G	0.273504	GT	GT	TT	GG	GT	GT	TT	TT	GT	TT	GG	GT	GG	GG	TT	GT	GT	GT	GG	GT	GT	GT	GT	GT	GT	GG	GT	GT	TT	GG	GT	GT	GT	GG	GT	GT	GT	GT	GT	TT	TT	GT	TT	GG
Gm13_37202493	Gm13	37202493	78.79	T	0.269231	TC	TC	CC	TT	TC	TC	CC	CC	TC	CC	TT	TC	TT	TT	CC	TC	TC	TC	TT	TC	TC	TC	TC	TC	TC	TT	TC	TC	CC	TT	TC	TC	TC	TT	TC	TC	TC	TC	TC	CC	CC	TC	CC	TT
Gm13_35423740	Gm13	35423740	95.13	T	0.324786	TC	TC	CC	TC	TC	TC	CC	TC	TC	TT	TC	TT	TT	TT	CC	TC	TC	TT	TT	TC	TC	TC	TC	TC	TC	TT	TC	TC	CC	TT	TC	TC	TC	TC	TC	CC	TC	TC	TC	CC	TC	TC	CC	TT
Gm13_34668501	Gm13	34668501	99.34	T	0.320513	CC	TC	TC	TC	TC	TC	CC	TC	TC	TT	TC	TC	TC	TT	CC	TT	TC	TT	TT	TC	TC	TC	TC	TC	TC	TC	TC	TC	CC	TT	TC	TC	TC	TC	TC	CC	TC	TC	TT	CC	TC	TT	CC	TT
Gm13_34518337	Gm13	34518337	100.43	A	0.320513	GG	AG	AG	AG	AG	AG	GG	AG	AG	AA	GG	AG	AG	AA	GG	AA	AG	AA	AA	AG	AG	AG	AG	AG	AG	AG	AG	AG	GG	AA	AG	AG	AG	AG	AG	GG	AG	AG	AA	GG	AG	AA	GG	AA
Gm13_34380875	Gm13	34380875	100.86	G	0.307692	CC	GC	GC	GC	GC	GC	CC	GC	GC	GG	CC	GC	GC	GG	CC	GG	GC	GG	GG	GC	GC	GC	GC	GC	GC	GC	GC	GC	CC	GG	GC	GC	GC	GC	GC	CC	GC	GC	GG	CC	GC	GG	CC	GG
Gm13_34303352	Gm13	34303352	101.08	T	0.303419	CC	TC	TC	TC	TC	TC	CC	TC	TC	TT	CC	TC	TC	TC	CC	TT	TC	TT	TT	TC	TC	TC	TC	TC	TC	TC	TC	TC	CC	TT	TC	TC	TC	TC	TC	CC	TC	TC	TT	CC	TC	TT	CC	TT
Gm13_33384454	Gm13	33384454	106.66	T	0.324786	TT	TC	TC	TC	TC	TC	TT	TC	TC	CC	TT	TC	CC	TC	TT	TC	TC	CC	TC	TC	TC	TC	TC	TC	TC	TC	TC	TC	TT	CC	TC	TC	TC	TC	TT	TT	TT	CC	CC	TC	TC	CC	TT	CC
Gm13_33367707	Gm13	33367707	114.43	A	0.235043	AA	AC	AC	AC	AC	AC	AA	AC	AC	AC	AA	AC	CC	AC	AA	AC	AC	CC	AC	AC	AC	AC	AC	AC	AC	AC	AC	AC	AA	CC	AC	AC	AC	AC	AA	AA	AA	CC	CC	AC	AC	CC	AA	AC
Gm13_33186133	Gm13	33186133	115.08	G	0.230769	GG	GC	GC	GC	GC	GC	GG	GC	GC	GC	GG	GC	CC	GC	GG	GC	GC	CC	GC	GC	GC	GC	CC	GC	GC	GC	GC	GC	GG	CC	GC	GC	CC	GC	GG	GG	GG	CC	CC	GC	GC	CC	GG	GC
Gm13_32503510	Gm13	32503510	117.05	C	0.239316	CC	CT	CT	CT	CT	CT	CC	CT	CT	CT	CC	CT	TT	CC	CC	CT	CT	TT	TT	CT	CT	CT	TT	CT	CT	CT	CT	CT	CT	TT	CT	CT	TT	CT	CC	CC	CC	TT	TT	CT	CT	TT	CC	CT
Gm13_31886795	Gm13	31886795	121.04	C	0.252137	CC	CT	CT	CT	CT	CT	CC	CT	CT	CT	CC	CT	TT	CC	CC	CT	CT	TT	TT	CT	CT	CT	TT	CT	CT	CT	CT	CT	CT	TT	CT	CT	TT	CT	CC	CC	CC	TT	CT	CT	CT	TT	CC	CT
Gm13_31049816	Gm13	31049816	123.01	T	0.25641	TT	CC	TC	TC	TC	TC	TT	TC	TC	TC	TT	TC	CC	TT	TT	TC	TC	CC	CC	TC	TC	TC	CC	TC	TC	TC	TC	TC	TC	CC	TC	TC	CC	TC	TT	TT	TT	CC	TC	TC	TC	CC	TT	TC
Gm13_30807408	Gm13	30807408	123.44	T	0.25641	TT	GG	TG	TG	TG	TG	TT	TG	TG	TG	TT	TG	GG	TT	TT	TG	TG	GG	GG	TG	TG	TG	GG	TG	TG	TG	TG	TG	TG	GG	TG	TG	GG	TG	TT	TT	TT	GG	TG	TG	TG	GG	TT	TG
Gm13_30646818	Gm13	30646818	124.09	A	0.260684	AA	TT	AT	AT	AT	AT	AA	AT	AT	AT	AA	AT	TT	AA	AA	AT	AT	TT	TT	AT	AT	AT	TT	AT	AT	AT	AT	AT	AT	TT	AT	AT	TT	AT	AA	AA	AA	TT	AT	AT	AT	TT	AA	AT
Gm13_30518945	Gm13	30518945	124.53	T	0.264957	TT	CC	TC	TC	TC	TC	TT	TC	TC	TC	TT	TC	CC	TT	TT	TC	TC	CC	CC	TC	TC	TC	CC	TC	TC	TC	TC	TC	TC	CC	TC	TC	CC	TC	TT	TT	TT	CC	TC	TC	TC	CC	TT	TC
Gm13_30231980	Gm13	30231980	124.96	A	0.269231	AA	CC	AC	AC	AC	AC	AA	AC	AC	AC	AA	AC	CC	AA	AC	AC	AC	CC	CC	AC	AC	AC	CC	AC	AC	AC	AC	AC	AC	CC	AC	AC	CC	AC	AA	AA	AA	CC	AC	AC	AC	CC	AA	AC
Gm13_30350936	Gm13	30350936	125.39	T	0.264957	TT	AA	TA	TA	TA	TA	TT	TA	TA	TA	TT	TA	AA	TT	TA	TA	TA	AA	AA	TA	TA	TA	AA	TA	TA	TA	TA	TA	TA	AA	TA	TA	AA	TA	TT	TT	TT	AA	TA	TA	TA	AA	TT	TA
Gm13_29300357	Gm13	29300357	127.36	C	0.260684	CC	TT	CT	CT	CT	CT	CC	CT	CT	CT	CC	CT	TT	CC	CT	CT	CT	TT	TT	CT	CT	CT	TT	CT	CT	CT	CT	CC	CT	TT	CT	CT	TT	CT	CC	CC	CC	TT	CT	CT	CT	TT	CC	CT
Gm13_29300315	Gm13	29300315	127.79	T	0.264957	TT	AA	TA	TA	TA	TA	TT	TA	TA	TA	TT	TA	AA	TT	TA	TA	TA	AA	AA	TA	TA	TA	AA	TA	TA	TA	TA	TT	TA	AA	TA	TA	AA	TA	TT	TT	TT	AA	TA	TA	TA	AA	TT	TA
Gm13_28928217	Gm13	28928217	129.75	A	0.269231	AA	GG	AG	AG	AG	AG	AG	AG	AG	AG	AA	AG	GG	AA	AG	AG	AG	GG	GG	GG	AG	AG	GG	AG	AG	AG	AG	AA	AA	GG	AG	AG	GG	AG	AA	AA	AA	GG	AG	AG	AG	GG	AA	AG
Gm13_28814949	Gm13	28814949	129.97	T	0.269231	TT	CC	TC	TC	TC	TC	TC	TC	TC	TC	TT	TC	CC	TT	TC	TC	TC	CC	CC	CC	TC	TC	CC	TC	TC	TC	TC	TT	TT	CC	TC	TC	CC	TC	TT	TT	TT	CC	TC	TC	TC	CC	TT	TC
Gm13_28584423	Gm13	28584423	130.19	C	0.269231	CC	TT	CT	CT	CT	CT	CT	CT	CT	CT	CC	CT	TT	CC	CT	CT	CT	TT	TT	TT	CT	CT	TT	CT	CT	CT	CT	CC	CC	TT	CT	CT	TT	CT	CC	CC	CC	TT	CT	CT	CT	TT	CC	CT
Gm13_28480189	Gm13	28480189	130.84	G	0.273504	GG	AA	GA	GA	GA	GA	GA	GA	GA	GA	GG	GA	AA	GG	GA	GA	GA	AA	AA	AA	GA	GA	AA	GA	GA	GA	GA	GG	GG	AA	GA	GA	AA	GA	GG	GG	GG	AA	GA	GA	GA	GA	GG	GA
Gm13_28304112	Gm13	28304112	131.49	C	0.264957	CC	TT	CT	CT	CT	CT	CT	CT	CT	CT	CC	CT	TT	CC	CT	CT	CT	TT	TT	TT	CT	CT	TT	CT	CT	CT	CT	CC	CC	TT	CT	CT	TT	CT	CC	CC	CC	TT	CT	CT	CT	CT	CC	CT
Gm13_28204537	Gm13	28204537	132.36	A	0.264957	AA	GG	AG	AG	AG	AG	AG	AG	AG	AG	AA	AG	GG	AA	AG	AG	AG	GG	GG	GG	AG	AG	GG	AG	AG	AG	AG	AA	AA	GG	AG	AG	GG	AG	AA	AA	AA	GG	AG	AG	AG	AG	AA	AG
Gm13_28047262	Gm13	28047262	132.58	A	0.264957	AA	GG	AG	AG	AG	AG	AG	AG	AG	AG	AA	AG	GG	AA	AG	AG	AG	GG	GG	GG	AG	AG	GG	AG	AG	AG	AG	AA	AA	GG	AG	AG	GG	AG	AA	AA	AA	GG	AG	AG	AG	AG	AA	AG
Gm13_28047243	Gm13	28047243	133.22	T	0.260684	TT	CC	TC	TC	TC	TC	TC	TC	TC	TC	TT	TC	CC	TT	TC	TC	TC	CC	CC	CC	TC	TC	CC	TC	TC	TC	TC	TT	TT	CC	TC	TC	CC	TC	TT	TT	TT	CC	TC	TC	TC	TC	TT	TC
Gm13_27867794	Gm13	27867794	134.09	T	0.25641	TT	GG	TG	TG	TG	TG	TG	TG	TG	TG	TT	TG	GG	TT	TG	TG	TG	GG	GG	GG	TG	TG	GG	TG	TG	TG	TG	TT	TT	GG	TG	TG	GG	TG	TT	TT	TT	GG	TG	TG	TG	TG	TT	TG
Gm13_27782089	Gm13	27782089	134.53	A	0.260684	AA	GG	AG	AG	AG	AG	AG	AG	AG	AG	AA	AG	GG	AA	AG	AG	AG	GG	GG	GG	AG	AG	GG	AG	AG	AG	AG	AA	AA	GG	AG	AG	GG	AG	AA	AA	AA	GG	AG	AG	AG	AG	AA	AG
Gm13_22401685	Gm13	22401685	172.15	G	0.24359	GG	AA	GA	GA	GA	AA	AA	GA	GA	GA	GG	AA	GA	GG	AA	GA	GA	GA	AA	AA	GA	GA	GA	AA	GG	GA	GA	GA	GA	GA	GG	GA	AA	GA	GG	GA	GG	GA	AA	GA	GG	GG	GA	GA
Gm13_22436145	Gm13	22436145	172.59	G	0.24359	GG	CC	GC	GC	GC	CC	CC	GC	GC	GC	GG	CC	GC	GG	CC	GC	GC	GC	CC	CC	GC	GC	GC	CC	GG	GC	GC	GC	GC	GC	GG	GC	CC	GC	GG	GC	GG	GC	CC	GC	GG	GG	GC	GC
Gm13_22436165	Gm13	22436165	173.24	A	0.247863	AA	GG	AG	AG	AG	GG	GG	AG	AG	AG	AA	GG	AG	AA	GG	AG	AG	AG	GG	GG	AG	AG	AG	GG	AA	AG	AG	AG	AG	AG	AA	AG	GG	AG	AA	AG	AA	AG	GG	AG	AA	AA	AG	AG
Gm13_22299451	Gm13	22299451	179.29	C	0.333333	CC	TT	CT	CT	CT	TT	TT	CT	CT	CT	CC	TT	CT	CC	TT	CT	CT	CT	TT	TT	CT	CC	CT	TT	CC	CT	CT	CT	CT	CT	CC	CT	TT	CT	CC	CT	CC	CT	TT	CT	CC	CC	CC	CT
Gm13_22299412	Gm13	22299412	180.81	C	0.311966	CC	TT	CT	CT	CT	TT	TT	CT	CT	CT	CC	TT	CT	CC	TT	CT	CT	CT	TT	TT	CT	CT	CT	TT	CC	CT	CT	CT	CT	CT	CC	CT	TT	CT	CC	CT	CC	CT	TT	CT	CC	CC	CT	CT
Gm13_21950198	Gm13	21950198	186.4	A	0.264957	AA	GG	AG	AG	AG	GG	GG	AG	AG	AG	AA	GG	AG	AA	GG	AG	AG	AG	GG	AG	AG	AG	AG	GG	AA	AG	AG	AG	AG	AG	AA	AG	GG	AG	AA	AG	AA	AG	GG	AG	AA	AA	AG	AG
Gm13_21168437	Gm13	21168437	193.16	T	0.247863	TT	CC	TC	TC	TC	CC	CC	TC	TC	CC	TT	TC	TC	TT	CC	TC	TT	TC	CC	TC	TC	TC	TC	CC	TT	TC	TC	TC	TC	TC	TT	TC	CC	TC	TT	TC	TT	TC	CC	TC	TC	TT	TC	CC
Gm13_21001634	Gm13	21001634	196.47	G	0.277778	GG	AA	GA	GA	GA	AA	AA	AA	GA	AA	GG	GA	GA	GG	AA	GA	GG	GA	AA	GA	GA	GA	GA	AA	GG	GA	GA	GA	GA	AA	GG	GA	AA	GA	GG	GA	GG	GA	AA	GA	GA	GG	GA	AA
Gm13_21001681	Gm13	21001681	196.9	T	0.273504	TT	AA	TA	TA	TA	AA	AA	AA	TA	AA	TT	TA	TA	TT	AA	TA	TT	TA	AA	TA	TA	TA	TA	AA	TT	TA	TA	TA	TA	AA	TT	TA	AA	TA	TT	TA	TT	TA	AA	TA	TA	TT	TA	AA
Gm13_20423748	Gm13	20423748	203.66	C	0.252137	CG	CG	GG	CG	GG	GG	GG	CG	CG	GG	CC	CG	CG	CC	GG	CG	CC	CG	GG	CG	CG	CG	CG	GG	CC	CG	CG	CG	CG	CG	CC	CC	GG	CG	CC	CG	CG	CG	GG	CG	CG	CC	CG	GG
Gm13_20220717	Gm13	20220717	204.1	A	0.252137	AG	AG	GG	AG	GG	GG	GG	AG	AG	GG	AA	AG	AG	AA	GG	AG	AA	AG	GG	AG	AG	AG	AG	GG	AA	AG	AG	AG	AG	AG	AA	AA	GG	AG	AA	AG	AG	AG	GG	AG	AG	AA	AG	GG
Gm13_20159508	Gm13	20159508	204.32	T	0.25641	TC	TC	CC	TC	CC	CC	CC	TC	TC	CC	TT	TC	TC	TT	CC	TC	TT	TC	CC	TC	TC	TC	TC	CC	TT	TC	TC	TC	TC	TC	TT	TT	CC	TC	TT	TC	TC	TC	CC	TC	TC	TT	TC	CC
Gm13_18817541	Gm13	18817541	207.16	A	0.25641	AG	AG	GG	AG	GG	GG	GG	AG	AG	AG	AA	AG	AG	AA	GG	AG	AA	AG	GG	AG	AG	AG	GG	GG	AA	AG	AG	AG	AG	AG	AA	AA	GG	AG	AA	AG	GG	AG	GG	AG	AG	AA	AG	GG
Gm13_18938528	Gm13	18938528	207.81	C	0.264957	CT	CT	TT	CT	TT	TT	TT	CT	CT	TT	CC	CT	CT	CC	TT	CT	CC	CT	TT	CT	CT	CT	TT	TT	CC	CT	CT	CT	CT	CT	CC	CC	TT	CT	CC	CT	TT	CT	TT	CT	CT	CC	CT	TT
Gm13_18938589	Gm13	18938589	208.25	G	0.264957	GA	GA	AA	GA	AA	AA	AA	GA	GA	AA	GG	GA	GA	GG	AA	GA	GG	GA	AA	GA	GA	GA	AA	AA	GG	GA	GA	GA	GA	GA	GG	GG	AA	GA	GG	GA	AA	GA	AA	GA	GA	GG	GA	AA
Gm13_18938594	Gm13	18938594	208.9	T	0.264957	TC	TC	CC	TC	CC	CC	CC	TC	TC	CC	TT	TC	TC	TT	CC	TC	TT	TC	CC	TC	TC	TC	CC	CC	TT	TC	TC	TC	TC	TC	TT	TT	CC	TC	TT	TC	CC	TC	CC	TC	TC	TT	TC	CC
Gm13_19034817	Gm13	19034817	209.55	T	0.25641	TC	TC	CC	TC	CC	CC	CC	TC	TC	CC	TT	TC	TC	TT	CC	TC	TT	TC	CC	TC	TC	TC	CC	CC	TT	TC	TC	TC	TC	TC	TT	TT	CC	TC	TT	TC	CC	TC	CC	TC	TC	TT	TC	CC
Gm13_18701840	Gm13	18701840	209.98	C	0.252137	CA	CA	AA	CA	AA	AA	AA	CA	CA	CA	CC	CA	CA	CC	AA	CA	CC	CA	AA	CA	CA	CA	AA	AA	CC	CA	CA	CA	CA	CA	CC	CC	AA	CA	CC	CA	AA	CA	AA	CA	CA	CC	CA	AA
Gm13_18242391	Gm13	18242391	212.62	T	0.260684	TC	TC	CC	TC	CC	CC	CC	CC	TC	TC	TT	TC	TC	TT	CC	TC	TT	TC	CC	TC	TC	TC	CC	TC	TT	TC	TC	TC	TC	CC	TT	TT	CC	TC	TT	TC	CC	TC	CC	TC	TC	TT	TC	CC
Gm13_16558524	Gm13	16558524	220.56	G	0.324786	GA	GA	AA	GG	AA	AA	AA	AA	GA	AA	GG	GA	GA	GG	GA	GG	GG	GA	AA	GA	GA	GA	AA	GA	GG	GA	GG	GA	GA	AA	GG	GG	GA	GA	GG	GA	AA	GA	AA	GA	GA	GG	GA	AA
Gm13_16706342	Gm13	16706342	227.33	T	0.260684	TA	TA	TT	TA	TT	TT	TT	TT	TA	TA	AA	TA	TA	AA	TT	AA	AA	TA	TT	TA	TA	TA	TT	TA	AA	TA	AA	TA	TA	TT	AA	AA	TA	TA	AA	TA	TT	TA	TT	TA	TA	TT	TA	TT
Gm13_16706305	Gm13	16706305	228.19	C	0.264957	CT	CT	CC	CT	CC	CC	CC	CC	CT	CT	TT	CT	CT	TT	CC	TT	TT	CT	CC	CT	CT	CT	CC	CT	TT	CT	TT	CT	CT	CC	TT	TT	CT	CT	TT	CC	CC	CT	CC	CT	CT	TT	CT	CC
Gm13_16811946	Gm13	16811946	228.84	A	0.252137	AT	AT	TT	AT	TT	TT	TT	TT	AT	AT	AA	AT	AT	AA	TT	AA	AA	AT	TT	AT	AT	AT	TT	AT	AA	AT	AA	AT	AT	TT	AA	AA	AT	AT	AA	AT	TT	AT	TT	AT	AT	AA	AT	TT
Gm13_15941689	Gm13	15941689	234.91	C	0.260684	CT	CT	TT	CC	TT	TT	TT	CT	CT	CT	CC	CT	CT	CC	CT	CC	CC	CC	TT	CT	CT	CT	TT	CT	CC	CT	CT	CT	CT	CT	CC	CC	CT	CT	CC	CT	TT	CT	TT	CT	CT	CC	CT	TT
Gm13_15869974	Gm13	15869974	235.13	G	0.260684	GC	GC	CC	GG	CC	CC	CC	GC	GC	GC	GG	GC	GC	GG	GC	GG	GG	GG	CC	GC	GC	GC	CC	GC	GG	GC	GC	GC	GC	GC	GG	GG	GC	GC	GG	GC	CC	GC	CC	GC	GC	GG	GC	CC
Gm13_15301589	Gm13	15301589	237.99	C	0.247863	CA	CC	AA	CC	AA	AA	AA	CA	AA	CA	CC	CA	CA	CA	CA	CC	CC	CC	AA	CA	CA	CA	AA	CA	CC	CA	CA	CA	CA	CA	CC	CC	CA	CA	CC	CA	AA	CA	AA	CA	CA	CC	CA	AA
Gm13_15193992	Gm13	15193992	238.2	T	0.252137	TA	TT	AA	TT	AA	AA	AA	TA	AA	TA	TT	TA	TA	TA	TA	TT	TT	TT	AA	TA	TA	TA	AA	TA	TT	TA	TA	TA	TA	TA	TT	TT	TA	TA	TT	TA	AA	TA	AA	TA	TA	TT	TA	AA
Gm13_15193999	Gm13	15193999	238.64	A	0.247863	AG	AA	GG	AA	GG	GG	GG	AG	GG	AG	AA	AG	AG	AG	AG	AA	AA	AA	GG	AG	AG	AG	GG	AG	AA	AG	AG	AG	AG	AG	AA	AA	AG	AG	AA	AG	GG	AG	GG	AG	AG	AA	AG	GG
Gm13_14722565	Gm13	14722565	239.94	C	0.247863	CT	CC	TT	CC	TT	TT	TT	CT	CT	CT	CT	CT	CT	CT	CT	CC	CC	CC	TT	CT	CT	CT	TT	CT	CC	CT	CT	CT	CT	CT	CC	CC	CT	CT	CC	CT	TT	CT	TT	CT	CT	CC	CT	TT
Gm13_14538551	Gm13	14538551	241.25	G	0.247863	GA	GG	AA	GG	AA	AA	AA	GA	GA	GA	GA	GA	GA	GA	GA	GG	GG	GG	AA	GA	GA	GA	AA	GA	GG	GA	GA	GA	GA	GA	GG	GA	GA	GA	GG	GA	AA	GA	AA	GA	GA	GG	GA	AA
Gm13_14613981	Gm13	14613981	241.9	G	0.252137	GA	GG	AA	GG	AA	AA	AA	GA	GA	GA	GA	GA	GA	GA	GA	GG	GG	GG	AA	GA	GA	GA	AA	GA	GG	GA	GA	GA	GA	GA	GG	GG	GA	GA	GG	GA	AA	GA	AA	GA	GA	GG	GA	AA
Gm13_26717362	Gm13	26717362	315.09	C	0.282051	TT	CT	CT	TT	CT	CC	CT	CT	CT	TT	CT	CT	CT	CT	CT	TT	CC	CT	TT	CC	TT	CT	TT	CC	CT	TT	CC	CT	CT	CT	CT	CC	CT	CC	CT	TT	TT	TT	CC	CC	CT	CT	CT	TT
Gm13_26717309	Gm13	26717309	315.31	T	0.286325	AA	TA	TA	AA	TA	TT	TA	TA	TA	AA	TA	TA	TA	TA	TA	AA	TT	TA	AA	TT	AA	TA	AA	TT	TA	AA	TT	TA	TA	TA	TA	TT	TA	TT	TA	AA	AA	AA	TT	TT	TA	TA	TA	AA
Gm14_48038336	Gm14	48038336	0	C	0.260684	CG	GG	GG	CC	CG	CG	CC	CG	CG	CG	CC	CC	CG	CG	CG	CC	CC	CG	CC	CG	GG	GG	CC	GG	GG	CC	CC	CG	CC	CG	GG	CG	CC	CG	GG	CC	CG	CC	GG	GG	CG	GG	CC	CC
Gm14_48132264	Gm14	48132264	1.09	A	0.252137	AG	GG	GG	AA	AG	AG	AA	AG	AG	AG	AA	AA	AG	AG	AG	AA	AA	AG	AA	AG	GG	GG	AA	AG	GG	AA	AA	AG	AA	AG	GG	AG	AA	AG	GG	AA	AG	AA	GG	GG	AG	GG	AA	AA
Gm14_48068327	Gm14	48068327	1.52	C	0.25641	CT	TT	TT	CC	CT	CT	CC	CT	CT	CT	CC	CC	CT	CT	CT	CC	CC	CT	CC	CT	TT	TT	CC	CT	TT	CC	CC	CT	CC	CT	TT	CT	CC	CT	TT	CC	CT	CC	TT	TT	CT	TT	CC	CC
Gm14_47972061	Gm14	47972061	2.17	A	0.247863	AG	GG	GG	AA	AG	AG	AA	AG	AG	AG	AA	AA	AG	AG	AG	AA	AA	AG	AA	AG	GG	GG	AA	GG	GG	AA	AA	AG	AA	AG	GG	AG	AA	AG	GG	AA	AG	AA	GG	GG	AG	GG	AA	AA
Gm14_47850727	Gm14	47850727	3.26	C	0.247863	CA	AA	AA	CC	AA	CA	CC	CA	CA	CA	CC	CC	CA	CA	CA	CC	CC	CA	CC	CA	AA	AA	CC	AA	AA	CC	CC	CA	CC	CA	AA	CA	CC	CA	AA	CC	CA	CC	AA	AA	CA	AA	CC	CC
Gm14_47549251	Gm14	47549251	12.69	C	0.316239	CG	GG	GG	CC	GG	CG	CC	GG	CG	GG	CC	CC	CG	CG	CG	CC	CC	CG	CC	CG	GG	GG	CC	GG	GG	CC	CC	CG	CC	GG	CG	CG	CC	CG	CG	CC	CG	CC	GG	GG	CG	GG	CC	GG
Gm14_43735962	Gm14	43735962	41.08	T	0.320513	TT	TT	TC	TC	TC	TC	CC	CC	TT	TT	TT	TC	TC	TC	TC	TC	TC	CC	CC	TC	TC	TC	CC	TT	TC	TC	CC	TT	TT	TT	TC	TC	TC	TC	TC	CC	CC	TC	TT	TT	CC	TT	TC	TT
Gm14_43654704	Gm14	43654704	41.73	A	0.316239	AA	AA	AG	AG	AG	AG	GG	GG	AA	AA	AA	AG	AG	AG	AG	AG	AG	GG	GG	AG	AG	AG	GG	AA	AG	AG	GG	AA	AA	AA	AG	AG	AG	AG	AG	GG	GG	AG	AA	AA	GG	AA	AG	AA
Gm14_43605021	Gm14	43605021	42.38	G	0.324786	GG	GG	GA	GA	GA	GA	AA	AA	GG	GG	GG	GA	GA	GA	GA	GA	GA	AA	AA	GA	GA	GA	AA	GG	GA	GA	AA	GG	GG	GG	GA	GA	GA	GA	GA	AA	AA	GA	GG	GG	AA	GG	GA	GG
Gm14_43011232	Gm14	43011232	42.59	T	0.316239	TT	TT	TC	TC	TC	TC	CC	CC	TT	TT	TT	TC	TC	TC	TC	TC	TC	CC	CC	TC	TC	TC	CC	TT	TC	TC	CC	TT	TT	TT	TC	TC	TC	TC	TC	CC	CC	TC	TT	TT	CC	TT	TC	TT
Gm14_42846082	Gm14	42846082	43.03	C	0.320513	CC	CC	CT	CT	CT	CT	TT	TT	CC	CC	CC	CT	CT	CT	CT	CT	CT	TT	TT	CT	CT	CT	TT	CC	CT	CT	TT	CC	CC	CC	CT	CT	CT	CT	CT	TT	TT	CT	CC	CC	TT	CC	CT	CC
Gm14_42785961	Gm14	42785961	43.25	A	0.316239	AA	AA	AG	AG	AG	AG	GG	GG	AA	AA	AA	AG	AG	AG	AG	AG	AG	GG	GG	AG	AG	AG	GG	AA	AG	AG	GG	AA	AA	AA	AG	AG	AG	AG	AG	GG	GG	AG	AA	AA	GG	AA	AG	AA
Gm14_42708386	Gm14	42708386	43.46	A	0.324786	AA	AA	AG	AG	AG	AG	GG	GG	AA	AA	AA	AG	AG	AG	AG	AG	AG	GG	GG	AG	AG	AG	GG	AA	AG	AG	GG	AA	AA	AA	AG	AG	AG	AG	AG	GG	GG	AG	AA	AA	GG	AA	AG	AA
Gm14_42521797	Gm14	42521797	43.68	A	0.324786	GG	GG	AG	AG	AG	AG	AA	AA	GG	GG	GG	AG	AG	AG	AG	AG	AG	AA	AA	AG	AG	AG	AA	GG	AG	AG	AA	GG	GG	GG	AG	AG	AG	AG	AG	AA	AA	AG	GG	GG	AA	GG	GG	GG
Gm14_42422506	Gm14	42422506	44.99	G	0.324786	TT	TT	GT	GT	GT	GT	GG	GG	TT	TT	TT	GT	GT	GT	GT	TT	GT	GG	GG	GT	GT	GT	GG	TT	GT	GT	GG	TT	TT	TT	GT	GT	GT	GT	GG	GG	GG	GT	TT	TT	GG	TT	TT	TT
Gm14_42422560	Gm14	42422560	45.42	A	0.324786	GG	GG	AG	AG	AG	AG	AA	AA	GG	GG	GG	AG	AG	AG	AG	GG	AG	AA	AA	AG	AG	AG	AA	GG	AG	AG	AA	GG	GG	GG	AG	AG	AG	AG	AA	AA	AA	AG	GG	GG	AA	GG	GG	GG
Gm14_42191754	Gm14	42191754	46.95	G	0.324786	AA	AA	GG	GA	GA	GA	GG	GG	AA	AA	AA	GA	GA	GA	GA	AA	GA	GG	GG	GA	GA	GA	GG	AA	GA	GA	GG	AA	AA	AA	GA	GA	GA	GA	GG	GG	GG	GA	AA	AA	GG	AA	AA	AA
Gm14_42191771	Gm14	42191771	47.6	G	0.324786	TT	TT	GG	GT	GT	GT	GG	GG	TT	TT	TT	GT	GT	GT	GT	TT	GT	GG	GG	GT	GT	GT	GG	TT	GT	GT	GG	TT	TT	TT	GT	GT	GT	GT	GG	GG	GG	GT	TT	TT	GG	TT	TT	TT
Gm14_42191727	Gm14	42191727	49.12	T	0.324786	CC	CC	TT	TC	TC	TC	TT	TT	CC	CC	CC	TT	TC	TC	TC	CC	TC	TT	TT	TC	TC	TC	TT	CC	TC	TC	TT	CC	CC	CC	TC	TC	TC	TC	TT	TT	TT	TC	CC	CC	TT	CC	CC	CC
Gm14_42217674	Gm14	42217674	50.87	A	0.32906	GG	GG	AG	AG	AG	AG	AA	AA	GG	GG	GG	AG	AG	AG	AG	GG	AG	AA	AA	AG	AG	AG	AA	GG	AG	AG	AA	GG	GG	GG	AG	AG	AG	AG	AA	AA	AA	AG	GG	GG	AA	GG	GG	GG
Gm14_41281282	Gm14	41281282	51.3	C	0.32906	TT	TT	CT	CT	CT	CT	CC	CC	TT	TT	TT	CT	CT	CT	CT	TT	CT	CC	CC	CT	CT	CT	CC	TT	CT	CT	CC	TT	TT	TT	CT	CT	CT	CT	CC	CC	CC	CT	TT	TT	CC	TT	TT	TT
Gm14_17947247	Gm14	17947247	52.61	G	0.32906	AA	AA	GA	GA	GA	GA	GG	GG	AA	AA	AA	GA	GA	GA	GA	AA	GA	GG	GG	GA	GA	GA	GG	AA	GA	GA	GG	AA	AA	AA	GA	GA	GA	GA	GG	GG	GG	GA	AA	AA	GG	AA	AA	AA
Gm14_17076051	Gm14	17076051	53.71	C	0.324786	TT	TT	CT	CT	CT	CT	CC	CC	TT	TT	TT	CT	CT	CT	CT	TT	CT	CC	CC	CT	CT	CT	CC	TT	CT	CT	CC	TT	TT	TT	CC	CT	CT	CT	CC	CC	CC	CT	TT	TT	CC	TT	TT	TT
Gm14_17076004	Gm14	17076004	54.37	C	0.324786	TT	TT	CT	CT	CT	CT	CC	CC	TT	TT	TT	CT	CT	CT	CT	TT	CT	CC	CC	CT	CT	CT	CC	TT	CT	CC	CC	TT	TT	TT	CC	CT	CT	TT	CC	CC	CC	CT	TT	TT	CC	TT	TT	TT
Gm14_16313044	Gm14	16313044	55.9	G	0.324786	AA	AA	GA	GA	GA	GA	GG	GG	AA	AA	AA	GA	GA	GA	GA	AA	GA	GG	GG	GA	GA	GA	GG	AA	GA	GA	GG	AA	AA	AA	GA	GA	GA	GA	GG	GG	GG	GA	AA	AA	GG	AA	AA	AA
Gm14_16313022	Gm14	16313022	56.33	C	0.324786	AA	AA	CA	CA	CA	CA	CC	CC	AA	AA	AA	CA	CA	CA	CA	AA	CA	CC	CC	CA	CA	CA	CC	AA	CA	CA	CC	AA	AA	AA	CA	CA	CA	CA	CC	CC	CC	CA	AA	AA	CC	AA	AA	AA
Gm14_38544862	Gm14	38544862	57.64	G	0.32906	AA	AA	GA	GA	GA	GA	GG	GG	AA	AA	AA	GA	GA	GA	GA	AA	GA	GG	GG	GA	GA	GA	GG	AA	GA	GA	GG	AA	AA	AA	GA	GA	GA	GA	GG	GG	GG	GA	AA	AA	GG	AA	AA	AA
Gm14_38544908	Gm14	38544908	57.86	T	0.32906	CC	CC	TC	TC	TC	TC	TT	TT	CC	CC	CC	TC	TC	TC	TC	CC	TC	TT	TT	TC	TC	TC	TT	CC	TC	TC	TT	CC	CC	CC	TC	TC	TC	TC	TT	TT	TT	TC	CC	CC	TT	CC	CC	CC
Gm14_38650426	Gm14	38650426	58.29	T	0.32906	CC	CC	TC	TC	TC	TC	TT	TT	CC	CC	CC	TC	TC	TC	TC	CC	TC	TT	TT	TC	TC	TC	TT	CC	TC	TC	TT	CC	CC	CC	TC	TC	TC	TC	TT	TT	TT	TC	CC	CC	TT	CC	CC	CC
Gm14_18934982	Gm14	18934982	58.94	A	0.324786	CC	CC	AC	AC	AC	AC	AA	AA	CC	CC	CC	AC	AC	AC	AC	CC	AA	AA	AA	AC	AC	AC	AA	CC	AC	AC	AA	CC	CC	CC	AC	AC	AC	AC	AA	AA	AA	AC	CC	CC	AA	CC	CC	CC
Gm14_18934997	Gm14	18934997	59.37	C	0.324786	AA	AA	CA	CA	CA	CA	CC	CC	AA	AA	AA	CA	CA	CA	CA	AA	CC	CC	CC	CA	CA	CA	CC	AA	CA	CA	CC	AA	AA	AA	CA	CA	CA	CA	CC	CC	CC	CA	AA	AA	CC	AA	AA	AA
Gm14_18934993	Gm14	18934993	59.81	G	0.324786	TT	TT	GT	GT	GT	GT	GG	GG	TT	TT	TT	GT	GT	GT	GT	TT	GG	GG	GG	GT	GT	GT	GG	TT	GT	GT	GG	TT	TT	TT	GT	GT	GT	GT	GG	GG	GG	GT	TT	TT	GG	TT	TT	TT
Gm14_40398386	Gm14	40398386	60.46	T	0.324786	CC	CC	TC	TC	TC	TC	TT	TT	CC	CC	CC	TC	TC	TC	TC	CC	TC	TT	TT	TC	TC	TC	TT	CC	TC	TC	TT	CC	CC	CC	TC	TC	TC	TC	TT	TT	TT	TC	CC	CC	TT	CC	CC	CC
Gm14_15368636	Gm14	15368636	60.68	T	0.32906	CC	CC	TC	TC	TC	TC	TT	TT	CC	CC	CC	TC	TC	TC	TC	CC	TC	TT	TT	TC	TC	TC	TT	CC	TC	TC	TT	CC	CC	CC	TC	TC	TC	TC	TT	TT	TT	TC	CC	CC	TT	CC	CC	CC
Gm14_15431418	Gm14	15431418	61.11	G	0.320513	AA	AA	GA	GA	GA	GA	GG	GG	AA	AA	AA	GA	GA	GA	GA	AA	GA	GG	GG	GA	GA	GA	GG	AA	GA	GA	GG	AA	AA	AA	GA	GA	GA	GA	GG	GG	GG	GA	AA	AA	GG	AA	AA	AA
Gm14_35507175	Gm14	35507175	61.76	T	0.324786	CC	CC	TC	TC	TC	TC	TT	TT	CC	CC	CC	TC	TC	TC	TC	CC	TC	TT	TT	TC	TC	TC	TT	CC	TC	TC	TT	CC	CC	CC	TC	TC	TC	TC	TT	TT	TT	TC	CC	CC	TT	CC	CC	CC
Gm14_17862958	Gm14	17862958	62.2	T	0.320513	GG	GG	TG	TG	TG	TG	TT	TT	GG	GG	GG	TG	TG	TG	TG	GG	TG	TT	TT	TG	TG	TG	TT	GG	TG	TG	TT	GG	GG	GG	TG	TG	TG	TG	TT	TT	TT	TG	GG	GG	TT	GG	GG	GG
Gm14_17862976	Gm14	17862976	62.41	A	0.320513	TT	TT	AT	AT	AT	AT	AA	AA	TT	TT	TT	AT	AT	AT	AT	TT	AT	AA	AA	AT	AT	AT	AA	TT	AT	AT	AA	TT	TT	TT	AT	AT	AT	AT	AA	AA	AA	AT	TT	TT	AA	TT	TT	TT
Gm14_18871204	Gm14	18871204	63.96	A	0.320513	GG	GG	AG	AG	AG	AG	AA	AA	GG	GG	GG	AG	AG	AG	AG	GG	AG	AA	AA	GG	AG	AG	AA	GG	AG	AG	AA	GG	GG	GG	AG	AG	AG	AG	AA	AA	AA	AG	GG	GG	AA	GG	GG	GG
Gm14_18266002	Gm14	18266002	65.28	T	0.320513	AA	AA	TA	TA	TA	TA	TT	TT	AA	AA	AA	TA	TA	TA	TA	AA	TA	TT	TT	TA	TA	TA	TT	AA	TA	TA	TT	AA	AA	AA	TA	TA	TA	TA	TT	TT	TT	TA	AA	AA	TT	AA	AA	AA
Gm14_19453556	Gm14	19453556	65.72	T	0.324786	CC	CC	TC	TC	TC	TC	TT	TT	CC	CC	CC	TC	TC	TC	TC	CC	TC	TT	TT	TC	TC	TC	TT	CC	TC	TC	TT	CC	CC	CC	TC	TC	TC	TC	TT	TT	TT	TC	CC	CC	TT	CC	CC	CC
Gm14_19453520	Gm14	19453520	65.94	G	0.324786	AA	AA	GA	GA	GA	GA	GG	GG	AA	AA	AA	GA	GA	GA	GA	AA	GA	GG	GG	GA	GA	GA	GG	AA	GA	GA	GG	AA	AA	AA	GA	GA	GA	GA	GG	GG	GG	GA	AA	AA	GG	AA	AA	AA
Gm14_16313066	Gm14	16313066	66.37	C	0.324786	TT	TT	CT	CT	CT	CT	CC	CC	TT	TT	TT	CT	CT	CT	CT	TT	CT	CC	CC	CT	CT	CT	CC	TT	CT	CT	CC	TT	TT	TT	CT	CT	CT	CT	CC	CC	CC	CT	TT	TT	CC	TT	TT	TT
Gm14_36237441	Gm14	36237441	66.59	G	0.324786	AA	AA	GA	GA	GA	GA	GG	GG	AA	AA	AA	GA	GA	GA	GA	AA	GA	GG	GG	GA	GA	GA	GG	AA	GA	GA	GG	AA	AA	AA	GA	GA	GA	GA	GG	GG	GG	GA	AA	AA	GG	AA	AA	AA
Gm14_15680484	Gm14	15680484	67.02	C	0.32906	TT	TT	CT	CT	CT	CT	CC	CC	TT	TT	TT	CT	CT	CT	CT	TT	CT	CC	CC	CT	CT	CT	CC	TT	CT	CT	CC	TT	TT	TT	CT	CT	CT	CT	CC	CC	CC	CT	TT	TT	CC	TT	TT	TT
Gm14_19344193	Gm14	19344193	67.68	A	0.324786	TT	TT	AT	AT	AA	AT	AA	AA	TT	TT	TT	AT	AT	AT	AT	TT	AT	AA	AA	AT	AT	AT	AA	TT	AT	AT	AA	TT	TT	TT	AT	AT	AT	AT	AA	AA	AA	AT	TT	TT	AA	TT	TT	TT
Gm14_19002518	Gm14	19002518	68.33	C	0.324786	AA	AA	CA	CA	CA	CA	CC	CC	AA	AA	AA	CA	CA	CA	CA	AA	CA	CC	CC	CA	CC	CA	CC	AA	CA	CA	CC	AA	AA	AA	CA	CA	CA	CA	CC	CC	CC	CA	AA	AA	CC	AA	AA	AA
Gm14_19002548	Gm14	19002548	68.54	A	0.324786	GG	GG	AG	AG	AG	AG	AA	AA	GG	GG	GG	AG	AG	AG	AG	GG	AG	AA	AA	AG	AA	AG	AA	GG	AG	AG	AA	GG	GG	GG	AG	AG	AG	AG	AA	AA	AA	AG	GG	GG	AA	GG	GG	GG
Gm14_19002604	Gm14	19002604	69.85	T	0.324786	CC	CC	TC	TC	TT	TC	TT	TT	CC	CC	CC	TC	TC	TC	TC	CC	TC	TT	TT	TC	TT	TC	TT	CC	TC	TC	TT	CC	CC	CC	TC	TC	TC	TC	TT	TT	TT	TC	CC	CC	TT	CC	CC	CC
Gm14_16354720	Gm14	16354720	72.26	A	0.324786	TT	TT	AT	AT	AT	AT	AA	AA	TT	TT	TT	AT	AT	AT	AT	TT	AT	AA	AA	AT	AA	AT	AA	TT	AT	AT	AA	TT	TT	TT	AT	AT	AA	AT	AA	AA	AA	AT	TT	TT	AA	TT	TT	TT
Gm14_16354698	Gm14	16354698	72.91	A	0.324786	GG	GG	AG	AG	AG	AG	AA	AA	GG	GG	GG	AG	AG	AG	AG	GG	AG	AA	AA	AG	AA	AG	AA	GG	AG	AG	AA	GG	GG	GG	AG	AG	AA	AG	AA	AA	AA	AG	GG	GG	AA	GG	GG	GG
Gm14_36880170	Gm14	36880170	74.88	C	0.324786	GG	GG	CG	CG	CG	CG	CC	CC	GG	GG	GG	CG	CG	CG	CG	GG	CG	CC	CC	CG	CG	CG	CC	GG	CG	CG	CC	GG	GG	GG	CG	CG	CG	CG	CC	CC	CC	CG	GG	GG	CC	GG	GG	GG
Gm14_36880206	Gm14	36880206	75.09	T	0.320513	GG	GG	TG	TG	TG	TG	TT	TT	GG	GG	GG	TT	TG	TG	TG	GG	TG	TT	TT	TG	TG	TG	TT	GG	TG	TG	TT	GG	GG	GG	TG	TG	TG	TG	TT	TT	TT	TG	GG	GG	TT	GG	GG	GG
Gm14_36880224	Gm14	36880224	76.19	G	0.320513	AA	AA	GA	GA	GA	GA	GG	GG	AA	AA	AA	GA	GA	GA	GA	AA	GA	GG	GG	GA	GG	GA	GG	AA	GA	GA	GG	AA	AA	AA	GA	GA	GA	GA	GG	GG	GG	GA	AA	AA	GG	AA	AA	AA
Gm14_36880182	Gm14	36880182	77.06	G	0.324786	CC	CC	GC	GC	GC	GC	GG	GG	CC	CC	CC	GC	GC	GC	GC	CC	GC	GG	GG	GC	GC	GC	GG	CC	GC	GC	GG	CC	CC	CC	GC	GC	GC	GC	GG	GG	GG	GC	CC	CC	GG	CC	CC	CC
Gm14_16232557	Gm14	16232557	77.71	A	0.324786	GG	GG	AG	AG	AG	AG	AA	AA	GG	GG	GG	AG	AG	AG	AG	GG	AG	AA	AA	AG	AG	AG	AA	GG	AG	AG	AA	GG	GG	GG	AG	AG	AG	AG	AA	AA	AA	AG	GG	GG	AA	GG	GG	GG
Gm14_18524081	Gm14	18524081	80.12	T	0.324786	CC	CC	TC	TC	TC	TC	TT	TT	CC	CC	CC	TC	TC	TC	TC	CC	TC	TT	TT	TC	TC	TC	TT	CC	TC	TC	TT	CC	CC	CC	TT	TT	TC	TC	TT	TT	TT	TC	CC	CC	TT	CC	CC	CC
Gm14_18524035	Gm14	18524035	82.52	T	0.324786	CC	CC	TC	TC	TC	TC	TT	TT	CC	CC	CC	TC	TC	TC	TC	CC	TC	TT	TT	TC	TC	TC	TT	CC	TC	TC	TT	CC	CC	CC	TT	TT	TT	TC	TT	TT	TT	TC	CC	CC	TT	CC	CC	CC
Gm14_37122367	Gm14	37122367	85.41	T	0.311966	CC	CC	TT	TC	TC	TC	TT	TT	CC	CC	CC	TC	TC	TT	TC	CC	TC	TT	TT	TC	TC	TT	TT	CC	TC	TC	TT	CC	CC	CC	TT	TT	TC	TC	TT	TT	TT	TC	CC	CC	TT	CC	CC	CC
Gm14_17168687	Gm14	17168687	89.21	A	0.324786	GG	GG	AG	AA	AG	AG	AA	AA	GG	GG	GG	AG	AG	AA	AG	GG	AG	AA	AA	AG	AG	AG	AA	GG	AG	AG	AA	GG	GG	GG	AG	AG	AG	AG	AA	AA	AA	AG	GG	GG	AA	GG	GG	GG
Gm14_17168701	Gm14	17168701	89.43	C	0.324786	TT	TT	CT	CC	CT	CT	CC	CC	TT	TT	TT	CT	CT	CC	CT	TT	CT	CC	CC	CT	CT	CT	CC	TT	CT	CT	CC	TT	TT	TT	CT	CT	CT	CT	CC	CC	CC	CT	TT	TT	CC	TT	TT	TT
Gm14_17168736	Gm14	17168736	90.51	A	0.324786	GG	GG	AG	AA	AG	AG	AA	AA	GG	GG	GG	AG	AG	AA	AG	GG	AG	AA	AA	AG	AG	AG	AA	GG	AG	AG	AA	GG	GG	GG	AG	AG	AG	AG	AA	AA	AA	AG	GG	GG	AA	GG	GG	GG
Gm14_38286287	Gm14	38286287	92.04	T	0.324786	CC	CC	TC	TC	TC	TC	TT	TT	CC	CC	CC	TC	TC	TT	TC	CC	TC	TT	TT	TC	TC	TC	TT	CC	TC	TC	TT	CC	CC	CC	TC	TC	TC	TC	TT	TT	TT	TC	CC	CC	TT	CC	CC	CC
Gm14_38286327	Gm14	38286327	92.26	C	0.324786	TT	TT	CT	CT	CT	CT	CC	CC	TT	TT	TT	CT	CT	CC	CT	TT	CT	CC	CC	CT	CT	CT	CC	TT	CT	CT	CC	TT	TT	TT	CT	CT	CT	CT	CC	CC	CC	CT	TT	TT	CC	TT	TT	TT
Gm14_38544835	Gm14	38544835	92.91	G	0.324786	AA	AA	GA	GA	GA	GA	GG	GG	AA	AA	AA	GA	GA	GG	GA	AA	GA	GG	GG	GA	GA	GA	GG	AA	GA	GA	GG	AA	AA	AA	GA	GA	GA	GA	GG	GG	GG	GA	AA	AA	GG	AA	AA	AA
Gm14_38544830	Gm14	38544830	93.99	T	0.324786	CC	CC	TC	TC	TC	TC	TT	TT	CC	CC	CC	TC	TC	TT	TC	CC	TC	TT	TT	TC	TC	TC	TT	CC	TC	TC	TT	CC	CC	CC	TC	TC	TC	TC	TT	TT	TT	TC	CC	CC	TT	CC	CC	CC
Gm14_38544798	Gm14	38544798	95.74	T	0.324786	CC	CC	TC	TC	TC	TC	TT	TT	CC	CC	CC	TC	TC	TT	TC	CC	TC	TT	TT	TC	TC	TC	TT	CC	TC	TC	TT	CC	CC	CC	TC	TC	TC	TC	TT	TT	TT	TC	CC	CC	TT	CC	CC	CC
Gm14_34643140	Gm14	34643140	99.04	C	0.320513	TT	TT	CT	CT	CT	CT	CC	CC	TT	TT	TT	CT	CT	CT	CT	TT	CT	CC	CC	CC	CT	CT	CC	TT	CT	CC	CC	TT	TT	TT	CT	CT	CT	CT	CC	CC	CC	CT	TT	TT	CC	TT	TT	TT
Gm14_34643150	Gm14	34643150	100.56	G	0.311966	TT	TT	GT	GT	GT	GT	GG	GG	TT	TT	GG	GT	GT	GT	GT	TT	GT	GG	GG	GG	GT	GT	GG	TT	GT	GT	GG	TT	TT	TT	GT	GT	GT	GT	GG	GG	GG	GT	TT	TT	GG	TT	TT	TT
Gm14_34329664	Gm14	34329664	102.53	G	0.32906	AA	AA	GA	GA	GA	GA	GG	GG	AA	AA	AA	GA	GA	GA	GA	AA	GA	GG	GG	GG	GA	GA	GG	AA	GA	GA	GG	AA	AA	AA	GA	GA	GA	GA	GG	GG	GG	GA	AA	AA	GG	AA	AA	AA
Gm14_34422103	Gm14	34422103	102.75	G	0.324786	AA	AA	GA	GA	GA	GA	GG	GG	AA	AA	AA	GA	GA	GA	GA	AA	GA	GG	GG	GG	GA	GA	GG	AA	GA	GA	GG	AA	AA	AA	GA	GA	GA	GA	GG	GG	GG	GA	AA	AA	GG	AA	AA	AA
Gm14_34527995	Gm14	34527995	103.18	T	0.324786	CC	CC	TC	TC	TC	TC	TT	TT	CC	CC	CC	TC	TC	TC	TC	CC	TC	TT	TT	TT	TC	TC	TT	CC	TC	TC	TT	CC	CC	CC	TC	TC	TC	TC	TT	TT	TT	TC	CC	CC	TT	CC	CC	CC
Gm14_34643102	Gm14	34643102	103.61	G	0.324786	CC	CC	GC	GC	GC	GC	GG	GG	CC	CC	CC	GC	GC	GC	GC	CC	GC	GG	GG	GG	GC	GC	GG	CC	GC	GC	GG	CC	CC	CC	GC	GC	GC	GC	GG	GG	GG	GC	CC	CC	GG	CC	CC	CC
Gm14_33243355	Gm14	33243355	105.15	G	0.324786	AA	AA	GA	GA	GA	GA	GG	GG	AA	AA	AA	GA	GA	GA	GA	AA	GA	GG	GG	GG	GA	GA	GG	AA	GA	GA	GG	AA	AA	AA	GA	GA	GA	GA	GG	GG	GG	GA	AA	AA	GG	AA	AA	AA
Gm14_30904776	Gm14	30904776	109.16	A	0.303419	TT	TT	AT	AT	AT	AT	AA	AA	TT	TT	TT	AT	AT	AA	AT	TT	AT	AA	AA	AA	AT	AT	AA	TT	AT	AT	AT	TT		TT	AT	AT	AT	AT	AA	AA	AA	AT	TT	TT	AA	AA		TT
Gm14_26354740	Gm14	26354740	111.73	C	0.320513	TT	TT	CT	CT	CT	CT	CC	CC	TT	TT	TT	CT	CT	CT	CT	TT	CT	CC	CC	CC	CT	CT	CT	TT	CT	CT	CT	TT	TT	TT	CT	CT	CT	CT	CC	CC	CC	CT	TT	TT	CC	CT	TT	TT
Gm14_21919067	Gm14	21919067	112.82	C	0.32906	TT	TT	CT	CT	CT	CT	CC	CC	TT	TT	TT	CT	CT	CT	CT	TT	CT	CC	CC	CC	CT	CT	CT	TT	CT	CT	CC	TT	TT	TT	CT	CT	CT	CT	CC	CC	CC	CC	TT	TT	CC	CT	TT	TT
Gm14_11535283	Gm14	11535283	115.67	A	0.333333	GG	GG	AG	AG	AG	AG	AA	AA	GG	GG	GG	AG	AG	AG	AG	GG	AG	AA	AA	AA	AG	AG	AG	GG	AG	AG	AG	GG	GG	GG	AG	AG	AG	AG	AA	AA	AG	AA	GG	GG	AA	AG	GG	GG
Gm14_7596955	Gm14	7596955	142.93	C	0.235043	CC	CG	CG	CG	CG	GG	GG	GG	CC	CG	CC	CC	CG	CG	CG	CG	CG	GG	GG	GG	CG	CG	CG	CG	CC	CG	CG	CC	CC	CC	GG	CG	GG	CG	GG	GG	CG	GG	CC	CC	CG	CG	CC	CG
Gm14_7596973	Gm14	7596973	143.36	C	0.24359	CC	CT	CT	CT	CT	TT	TT	TT	CC	CT	CC	CC	CT	CT	CT	CT	CT	TT	TT	TT	CT	CT	CT	CT	CC	CT	CT	CC	CC	CC	TT	CT	TT	CT	TT	TT	CT	TT	CC	CC	CT	CT	CC	CT
Gm14_7175927	Gm14	7175927	147.58	A	0.264957	TT	AT	AT	AT	AT	AA	AA	AA	TT	AT	TT	TT	AT	AT	AT	AT	AT	AA	AA	AA	AT	AT	AT	AT	TT	AT	AT	TT	TT	TT	AA	AT	AA	AT	AA	AA	AT	AA	TT	TT	AT	AT	TT	AT
Gm14_7175923	Gm14	7175923	148.23	G	0.260684	AA	GA	GA	GA	GA	GG	GG	GG	AA	GA	AA	AA	GA	GA	GA	GA	GA	GG	GG	GG	GA	GA	GA	GA	AA	GA	GA	AA	AA	AA	GG	GA	GG	GA	GG	GG	GA	GG	AA	AA	GA	GA	AA	GA
Gm14_7175907	Gm14	7175907	148.66	C	0.252137	TT	CT	CT	CT	CT	CC	CC	CC	TT	CT	TT	TT	CT	CT	CT	CT	CT	CC	CC	CC	CT	CT	CT	CT	TT	CT	CT	TT	TT	TT	CC	CT	CC	CT	CC	CC	CT	CC	TT	TT	CT	CT	TT	CT
Gm14_5839688	Gm14	5839688	162.33	A	0.239316	AT	AT	AT	AT	AT	TT	TT	AT	AT	AT	AA	AT	AT	AT	AT	AT	TT	AT	AT	TT	AT	AT	AA	TT	AA	AT	AT	AT	AA	TT	TT	AA	TT	AT	AA	TT	AA	TT	AA	AA	AT	AT	AT	AT
Gm14_5180836	Gm14	5180836	167.24	C	0.252137	CT	CT	CT	CC	CT	TT	TT	CT	CT	CT	CC	CT	CT	CT	CT	CT	TT	CT	CT	TT	CT	CT	CC	TT	CT	CT	CT	CT	CC	TT	CT	CC	TT	CT	CC	TT	CC	TT	CC	CC	CT	CT	CT	CT
Gm14_5143986	Gm14	5143986	167.89	G	0.252137	GC	GC	GC	GG	GC	CC	CC	GC	GC	GC	GG	GC	GC	GC	GC	GC	CC	GG	GC	CC	GC	GC	GG	CC	GC	GC	GC	GC	GG	CC	GC	GG	CC	GC	GG	CC	GG	CC	GG	GG	GC	GC	GC	GC
Gm14_4879270	Gm14	4879270	170.98	A	0.24359	AG	AG	AG	AA	AG	GG	GG	AG	AG	AG	AA	GG	AG	AG	AG	AG	GG	AG	AG	GG	AG	AG	AA	GG	AG	AG	AG	AG	AA	GG	AG	AA	GG	AG	AA	GG	AA	GG	AA	AA	AG	AG	AG	AG
Gm14_4879250	Gm14	4879250	171.2	C	0.247863	CG	CG	CG	CC	CG	GG	GG	CG	CG	CG	CC	GG	CG	CG	CG	CG	GG	CG	CG	GG	CG	CG	CC	GG	CG	CG	CG	CG	CC	GG	CG	CC	GG	CG	CC	GG	CC	GG	CC	CC	CG	CG	CG	CG
Gm14_4879251	Gm14	4879251	171.41	A	0.252137	AT	AT	AT	AA	AT	TT	TT	AT	AT	AT	AA	TT	AT	AT	AT	AT	TT	AT	AT	TT	AT	AT	AA	TT	AT	AT	AT	AT	AA	TT	AT	AA	TT	AT	AA	TT	AA	TT	AA	AA	AT	AT	AT	AT
Gm14_4819639	Gm14	4819639	172.28	T	0.239316	TC	TC	TC	TT	TC	CC	CC	TC	TC	TC	TT	CC	TC	TC	TC	TC	CC	TC	TC	CC	TC	TC	TT	CC	TC	TC	TC	TC	TT	CC	TC	TT	CC	TC	TT	CC	TT	CC	TT	TT	TC	TC	TC	TC
Gm14_4673354	Gm14	4673354	172.93	G	0.235043	GA	GA	GA	GG	GA	AA	AA	GA	GA	GA	GG	AA	GA	GA	GA	GA	AA	GA	GA	AA	GA	GA	GG	AA	GA	GA	GA	GA	GG	AA	GA	GG	AA	GA	GG	AA	GG	AA	GG	GG	GA	GA	GA	GA
Gm14_4219150	Gm14	4219150	182.22	T	0.311966	TC	TC	TC	CC	TC	TT	TT	CC	TC	CC	CC	TT	TC	TT	TC	TC	TT	TC	TC	TT	TC	TC	CC	TT	TC	TC	TC	TC	CC	TT	TT	CC	TT	TC	CC	TT	CC	TT	CC	CC	TT	TC	CC	CC
Gm14_3356635	Gm14	3356635	183.98	A	0.320513	AG	AG	AG	GG	AG	AA	AA	GG	AG	GG	GG	AA	AA	AA	AG	AG	AA	AG	AG	AA	AG	GG	GG	AA	AG	AG	AG	AG	GG	AA	AG	GG	AA	AG	GG	AA	GG	AA	GG	GG	AA	AG	GG	GG
Gm14_3599677	Gm14	3599677	184.63	G	0.324786	GC	GC	GC	CC	GC	GG	GG	CC	GC	CC	CC	GG	GG	GG	GC	GC	GG	GC	GC	GG	GC	CC	CC	GG	GC	GC	GC	GC	CC	GG	GC	CC	GG	GC	CC	GG	CC	GG	CC	CC	GG	GC	CC	CC
Gm14_2317210	Gm14	2317210	190.43	C	0.320513	CG	CG	CG	GG	CG	CC	CC	GG	CG	GG	GG	CC	CC	CC	CG	CG	CC	CG	CG	CG	CG	GG	CG	CC	CG	CG	CG	CG	GG	CC	CG	GG	CC	CG	GG	CC	CG	CG	GG	GG	CG	CG	CG	GG
Gm15_42803891	Gm15	42803891	0	A	0.324786	AA	AT	AA	AA	AT	AT	TT	AA	AT	TT	AT	AA	AA	AA	AA	AT	TT	AT	TT	AA	AA	AT	AT	TT	TT	AA	AA	TT	AT	TT	AA	AT	AA	AA	AT	AA	AA	TT	AA	AT	AA	AT	AT	AA
Gm15_40899453	Gm15	40899453	0.43	T	0.32906	TT	TC	TT	TT	TC	TC	CC	TT	TC	CC	TC	TT	TT	TT	TT	TC	CC	TC	CC	TT	TT	TC	TC	CC	CC	TT	TT	CC	TC	CC	TT	TC	TT	TT	TC	TT	TT	CC	TT	TC	TT	TC	TC	TT
Gm15_42606513	Gm15	42606513	0.65	G	0.32906	GG	GA	GG	GG	GA	GA	AA	GG	GA	AA	GA	GG	GG	GG	GG	GA	AA	GA	AA	GG	GG	GA	GA	AA	AA	GG	GG	AA	GA	AA	GG	GA	GG	GG	GA	GG	GG	AA	GG	GA	GG	GA	GA	GG
Gm15_41780709	Gm15	41780709	1.08	G	0.32906	GG	GA	GG	GG	GG	GA	AA	GG	GA	AA	GA	GG	GG	GG	GG	GA	AA	GA	AA	GG	GG	GA	GA	AA	AA	GG	GG	AA	GA	AA	GG	GA	GG	GG	GA	GG	GG	AA	GG	GA	GG	GA	GA	GG
Gm15_41780695	Gm15	41780695	1.52	C	0.32906	CC	CA	CC	CC	CA	CA	AA	CC	CA	AA	CA	CC	CC	CC	CC	CA	AA	CA	AA	CC	CC	CA	CA	AA	AA	CC	CC	AA	CA	AA	CC	CA	CC	CC	CA	CC	CC	AA	CC	CA	CC	CA	CA	CC
Gm15_40818895	Gm15	40818895	1.95	C	0.320513	CC	CT	CC	CC	CT	CT	TT	CC	CT	TT	CT	CC	CC	CC	CC	CT	TT	CT	TT	CC	CC	CT	CT	TT	TT	CC	CC	TT	CT	TT	CC	CT	CC	CC	CT	CC	CC	TT	CC	CT	CC	CT	CT	CC
Gm15_38255350	Gm15	38255350	2.39	G	0.324786	GG	GA	GG	GG	GA	GA	AA	GG	GA	AA	GA	GG	GG	GG	GG	GA	AA	GA	AA	GG	GG	GA	AA	AA	AA	GG	GG	AA	GA	AA	GG	GA	GG	GG	GA	GG	GG	AA	GG	GA	GG	GA	GA	GG
Gm15_36528605	Gm15	36528605	2.82	G	0.324786	GG	GA	GG	GG	GA	GA	AA	GG	GA	AA	GA	GG	GG	GG	GG	GA	AA	GA	AA	GG	GG	GA	AA	AA	AA	GG	GG	AA	GA	AA	GG	GA	GG	GG	GA	GG	GG	AA	GG	GA	GG	GA	GA	GG
Gm15_32339715	Gm15	32339715	3.26	G	0.324786	GG	GA	GG	GG	GA	GA	AA	GG	GA	AA	GA	GG	GG	GG	GG	GA	AA	GA	AA	GG	GG	GA	AA	AA	AA	GG	GG	AA	GA	AA	GG	GA	GG	GG	GA	GG	GG	AA	GG	GA	GG	GA	GA	GG
Gm15_37055986	Gm15	37055986	3.69	C	0.32906	CC	CT	CC	CC	CT	CT	TT	CC	CT	TT	CT	CC	CC	CC	CC	CT	TT	CT	TT	CC	CC	CT	TT	TT	TT	CC	CC	TT	CT	TT	CC	CT	CC	CC	CT	CC	CC	TT	CC	CT	CC	CT	CC	CC
Gm15_35822897	Gm15	35822897	3.9	C	0.324786	CC	CT	CC	CC	CT	CT	TT	CC	CT	TT	CT	CC	CC	CC	CC	CT	TT	CT	TT	CC	CC	CT	TT	TT	TT	CC	CC	TT	CT	TT	CC	CT	CC	CC	CT	CC	CC	TT	CC	CT	CC	CT	CT	CC
Gm15_36528635	Gm15	36528635	6.98	C	0.290598	CC	CG	CC	CC	CG	CG	GG	CC	CG	GG	CG	CC	CC	CC	CG	CG	GG	CG	GG	CC	CC	CG	GG	GG	GG	CC	CC	GG	CG	GG	CC	CG	CC	CC	CG	CC	CC	GG	GG	CG	CC	CG	CG	CC
Gm15_32095296	Gm15	32095296	8.95	T	0.277778	TT	TA	TT	TT	TA	TA	AA	TT	TA	AA	TA	TA	TT	TT	TA	TA	AA	TA	TA	TT	TT	TA	AA	AA	AA	TT	TT	AA	TA	AA	TT	TA	TT	TT	TA	TT	TT	AA	AA	TA	TT	TA	TA	TT
Gm15_32095320	Gm15	32095320	9.38	T	0.277778	TT	TG	TT	TT	TG	TG	GG	TT	TG	GG	TG	TG	TT	TT	TG	TG	GG	TG	GG	TT	TT	TG	GG	GG	GG	TT	TT	GG	TG	GG	TT	TG	TT	TT	TG	TT	TG	GG	GG	TG	TT	TG	TG	TT
Gm15_25043408	Gm15	25043408	9.81	A	0.277778	AA	AG	AA	AA	AG	AG	GG	AA	AG	GG	AG	AG	AA	AA	AG	AG	GG	AG	GG	AA	AA	AG	GG	GG	GG	AA	AA	GG	AG	GG	AA	AG	AA	AA	AG	AA	AG	GG	GG	AG	AA	AG	AG	AA
Gm15_29353655	Gm15	29353655	10.03	T	0.277778	TT	TC	TT	TT	TC	TC	CC	TT	TC	CC	TC	TC	TT	TT	TC	TC	CC	TC	CC	TT	TT	TC	CC	CC	CC	TT	TT	CC	TC	CC	TT	TC	TT	TT	TC	TT	TC	CC	CC	TC	TT	TC	TC	TT
Gm15_30890545	Gm15	30890545	10.68	G	0.277778	GG	GA	GG	GG	GA	GA	AA	GG	GA	AA	GA	GA	GG	GG	GA	GA	AA	GA	AA	GG	GG	GA	AA	AA	AA	GG	GG	AA	GA	AA	GG	GA	GG	GG	GA	GG	GA	AA	AA	GA	GG	GA	GA	GG
Gm15_23524376	Gm15	23524376	12.43	G	0.290598	GG	GA	GG	GG	GA	GA	AA	GG	GA	AA	GG	GA	GG	GG	GA	GA	AA	GA	AA	GG	GG	GA	AA	AA	AA	GG	GG	AA	GA	AA	GG	GA	GA	GG	GA	GG	GA	AA	AA	GA	GG	GA	GA	GG
Gm15_23524373	Gm15	23524373	12.64	A	0.294872	AA	AG	AA	AA	AG	AG	GG	AA	AG	GG	AA	AG	AA	AA	AG	AG	GG	AG	GG	AA	AA	AG	GG	GG	GG	AA	AA	GG	AG	GG	AA	AG	AG	AA	AG	AA	AG	GG	GG	AG	AA	AG	AG	AA
Gm15_23524395	Gm15	23524395	13.29	C	0.290598	CC	CT	CC	CC	CT	CT	TT	CC	CT	TT	CC	CT	CC	CC	CT	CT	TT	CT	TT	CC	CC	CT	TT	TT	TT	CC	CC	TT	CT	TT	CC	CT	CT	CC	CT	CC	CT	TT	TT	CT	CC	CT	CT	CC
Gm15_23524415	Gm15	23524415	14.16	A	0.277778	AA	AC	AA	AA	AC	AC	CC	AA	AC	CC	AA	AC	AA	AA	AC	AC	CC	AC	CC	AA	AA	AC	CC	CC	CC	AA	AA	CC	AC	CC	AA	AC	AC	AA	AC	AA	AC	CC	CC	AC	AA	AC	AC	AA
Gm15_23136078	Gm15	23136078	14.82	C	0.277778	CC	CT	CC	CC	CT	CT	TT	CC	CT	TT	CT	CT	CC	CC	CT	CT	TT	CT	TT	CC	CC	CT	TT	TT	TT	CC	CC	TT	CT	TT	CC	CT	CT	CC	CT	CC	CT	TT	TT	CT	CC	CT	CT	CC
Gm15_20583365	Gm15	20583365	15.46	A	0.282051	AA	AG	AG	AA	AG	AG	GG	AA	AG	GG	AG	AG	AA	AA	AG	AG	GG	AG	GG	AA	AA	AG	GG	GG	GG	AA	AA	GG	AG	GG	AA	AG	AG	AA	AG	AA	AG	GG	GG	AG	AA	AG	AG	AA
Gm15_21105061	Gm15	21105061	15.68	A	0.282051	AA	AG	AG	AA	AG	AG	GG	AA	AG	GG	AG	AG	AA	AA	AG	AG	GG	AG	GG	AA	AA	AG	GG	GG	GG	AA	AA	GG	AG	GG	AA	AG	AG	AA	AG	AA	AG	GG	GG	AG	AA	AG	AG	AA
Gm15_21105091	Gm15	21105091	16.33	C	0.282051	CC	CT	CT	CC	CT	CT	TT	CC	CT	TT	CT	CT	CC	CC	CT	CT	TT	CT	TT	CC	CC	CT	TT	TT	TT	CC	CC	TT	CT	TT	CC	CT	CT	CC	CT	CC	CT	TT	TT	CT	CC	CT	CT	CC
Gm15_21105098	Gm15	21105098	16.98	C	0.282051	CC	CA	CA	CC	CA	CA	AA	CC	CA	AA	CA	CA	CC	CC	CA	CA	AA	CA	AA	CC	CC	CA	AA	AA	AA	CC	CC	AA	CA	AA	CC	CA	CA	CC	CA	CC	CA	AA	AA	CA	CC	CA	CA	CC
Gm15_20654903	Gm15	20654903	18.07	G	0.277778	GG	GA	GA	GG	GA	GA	AA	GG	GA	AA	GA	GA	GG	GG	GA	GA	AA	GA	AA	GG	GG	GA	AA	AA	AA	GG	GG	AA	GA	AA	GG	GA	GA	GG	GA	GG	GA	AA	AA	GA	GG	GA	GA	GG
Gm15_22813073	Gm15	22813073	18.94	T	0.277778	TT	TC	TC	TT	TC	TC	CC	TT	TC	CC	TC	TC	TT	TT	TC	TC	CC	TC	CC	TT	TT	TC	CC	CC	CC	TT	TT	CC	TC	CC	TT	TC	TC	TT	TC	TT	TC	CC	CC	TC	TT	TC	TC	TT
Gm15_24318200	Gm15	24318200	19.59	A	0.277778	AA	AT	AA	AA	AT	AT	TT	AA	AT	TT	AT	AT	AA	AA	AT	AT	TT	AT	TT	AA	AA	AT	TT	TT	TT	AA	AA	TT	AT	TT	AA	AT	AT	AA	AT	AA	AT	TT	TT	AT	AA	AT	AT	AA
Gm15_24318210	Gm15	24318210	20.02	T	0.277778	TT	TC	TT	TT	TC	TC	CC	TT	TC	CC	TC	TC	TT	TT	TC	TC	CC	TC	CC	TT	TT	TC	CC	CC	CC	TT	TT	CC	TC	CC	TT	TC	TC	TT	TC	TT	TC	CC	CC	TC	TT	TC	TC	TT
Gm15_24318246	Gm15	24318246	20.45	T	0.277778	TT	TC	TT	TT	TC	TC	CC	TT	TC	CC	TC	TC	TT	TT	TC	TC	CC	TC	CC	TT	TT	TC	CC	CC	CC	TT	TT	CC	TC	CC	TT	TC	TC	TT	TC	TT	TC	CC	CC	TC	TT	TC	TC	TT
Gm15_25236189	Gm15	25236189	20.89	G	0.277778	GG	GA	GG	GG	GA	GA	AA	GG	GA	AA	GA	GA	GG	GG	GA	GA	AA	GA	AA	GG	GG	GA	AA	AA	AA	GG	GG	AA	GA	AA	GG	GA	GG	GG	GA	GG	GA	AA	AA	GA	GG	GA	GA	GG
Gm15_34762620	Gm15	34762620	21.32	G	0.269231	GG	GC	GG	GG	GC	GC	CC	GG	GC	CC	GC	GC	GG	GG	GC	GC	CC	GC	CC	GG	GG	GC	CC	CC	CC	GG	GG	CC	GC	CC	GG	GC	GG	GG	GC	GG	GC	CC	CC	GC	GG	GC	GC	GG
Gm15_34875812	Gm15	34875812	21.76	T	0.277778	TT	TG	TT	TT	TG	TG	GG	TT	TG	GG	TG	TG	TT	TT	TG	TG	GG	TG	GG	TT	TT	TG	GG	GG	GG	TT	TT	GG	TG	GG	TT	TG	TT	TT	TG	TT	TG	GG	GG	TG	TT	TG	TG	TT
Gm15_35471954	Gm15	35471954	22.42	T	0.286325	TT	TG	TT	TT	TG	TG	GG	TT	TG	GG	TG	TG	TT	TT	TG	TG	GG	TG	GG	TT	TT	TG	GG	GG	GG	TT	TT	GG	TG	GG	TT	TG	TT	TT	TG	TT	TG	GG	GG	TG	TT	TG	TG	TT
Gm15_36748340	Gm15	36748340	23.08	C	0.277778	CC	CG	CC	CC	CG	CG	GG	CC	CG	GG	CG	CG	CC	CC	CG	CG	GG	CG	GG	CC	CC	CG	GG	GG	GG	CC	CC	GG	CG	GG	CC	CG	CC	CC	CG	CC	CG	GG	GG	CG	CC	CG	CG	CC
Gm15_36748357	Gm15	36748357	23.51	C	0.282051	CC	CT	CC	CC	CT	CT	TT	CC	CT	TT	CT	CT	CC	CC	CT	CT	TT	CC	TT	CC	CC	CT	TT	TT	TT	CC	CC	TT	CT	TT	CC	CT	CC	CC	CT	CC	CT	TT	TT	CT	CC	CT	CT	CC
Gm15_38255343	Gm15	38255343	24.38	T	0.277778	TT	TC	TT	TT	TC	TC	CC	TT	TC	CC	TC	TC	TT	TT	TC	TC	CC	TC	CC	TT	TT	TC	CC	CC	CC	TT	TT	CC	TC	CC	TT	TC	TT	TT	TC	TT	TC	CC	CC	TC	TT	TC	TC	TT
Gm15_37486444	Gm15	37486444	25.26	T	0.282051	TT	TC	TT	TT	TC	TC	CC	TT	TC	CC	TC	TC	TT	TT	TC	TC	CC	TC	CC	TT	TT	TC	CC	CC	CC	TT	TT	CC	TC	CC	TT	TC	TT	TT	TC	TT	TC	CC	CC	TC	TT	TC	TC	TT
Gm15_37622466	Gm15	37622466	26.13	A	0.273504	AA	AT	AA	AA	AT	AT	TT	AA	AT	TT	AT	AT	AA	AA	AT	AT	TT	AT	TT	AA	AA	AT	TT	TT	TT	AA	AA	TT	AT	TT	AA	AT	AA	AA	AT	AA	AT	TT	TT	AT	AA	AT	AT	AA
Gm15_36115164	Gm15	36115164	26.34	G	0.273504	GG	GA	GG	GG	GA	GA	AA	GG	GA	AA	GA	GA	GG	GG	GA	GA	AA	GA	AA	GG	GG	GA	AA	AA	AA	GG	GG	AA	GA	AA	GG	GA	GG	GG	GA	GG	GA	AA	AA	GA	GG	GA	GA	GG
Gm15_40614556	Gm15	40614556	26.78	C	0.282051	CC	CT	CC	CC	CT	CT	TT	CC	CT	TT	CT	CT	CC	CC	CT	CT	TT	CT	TT	CC	CC	CT	TT	TT	TT	CC	CC	TT	CT	TT	CC	CT	CC	CC	CT	CC	CT	TT	TT	CT	CC	CT	CT	CC
Gm15_36639289	Gm15	36639289	27.43	T	0.277778	TT	TC	TT	TT	TC	TC	CC	TT	TC	CC	TC	TC	TT	TT	TC	TC	CC	TC	CC	TT	TT	TC	CC	CC	CC	TT	TT	CC	TC	CC	TT	CC	TT	TT	TC	TT	TC	CC	CC	TC	TT	TC	TC	TT
Gm15_38069680	Gm15	38069680	27.86	A	0.273504	AA	AG	AA	AA	AG	AG	GG	AA	AG	GG	AG	AG	AA	AA	AG	AG	GG	AG	GG	AA	AA	AG	GG	GG	GG	AA	AA	GG	AG	GG	AA	AG	AA	AA	AG	AA	AG	GG	GG	AG	AA	AG	AG	AA
Gm15_37055940	Gm15	37055940	28.08	A	0.273504	AA	AC	AA	AA	AC	AC	CC	AA	AC	CC	AC	AC	AA	AA	AC	AC	CC	AC	CC	AA	AA	AC	CC	CC	CC	AA	AA	CC	AC	CC	AA	AC	AA	AA	AC	AA	AC	CC	CC	AC	AA	AC	AA	AA
Gm15_42580387	Gm15	42580387	29.82	A	0.299145	AA	AG	AA	AA	AG	AG	GG	AA	AG	GG	AG	AG	AA	AA	AG	AG	GG	AG	GG	AA	AA	AG	AG	GG	GG	AA	AA	GG	AG	GG	AA	AG	AA	AA	AG	AA	AG	GG	GG	AG	AA	AG	AA	AA
Gm15_42580399	Gm15	42580399	30.91	C	0.303419	CC	CT	CC	CC	CT	CT	TT	CC	CC	TT	CT	CT	CC	CC	CT	CT	TT	CT	TT	CC	CC	CT	CT	TT	TT	CC	CC	TT	CT	TT	CC	CT	CC	CC	CT	CC	CT	TT	TT	CT	CC	CT	CC	CC
Gm15_42580409	Gm15	42580409	32.44	T	0.316239	TT	TC	TT	TT	TC	TC	CC	TT	TT	CC	TC	TC	TT	TT	TC	TC	CC	TC	CC	TT	TT	TC	TC	CC	CC	TT	TT	CC	TC	CC	TT	TC	TT	TT	TC	TT	TC	CC	CC	TC	TT	TT	TC	TT
Gm15_41392206	Gm15	41392206	34.84	A	0.269231	AA	AG	AA	AA	AG	AG	GG	AA	AG	GG	AG	AG	AA	AA	AG	AG	GG	AG	GG	AA	AA	AG	AG	GG	GG	AA	AA	GG	AG	GG	AA	AG	AA	AA	AG	AA	AG	GG	GG	AG	AA	AG	AG	AA
Gm15_41228088	Gm15	41228088	35.06	C	0.269231	CC	CT	CC	CC	CT	CT	TT	CC	CT	TT	CT	CT	CC	CC	CT	CT	TT	CT	TT	CC	CC	CT	CT	TT	TT	CC	CC	TT	CT	TT	CC	CT	CC	CC	CT	CC	CT	TT	TT	CT	CC	CT	CT	CC
Gm15_43486898	Gm15	43486898	35.28	A	0.269231	AA	AG	AA	AA	AG	AG	GG	AA	AG	GG	AG	AG	AA	AA	AG	AG	GG	AG	GG	AA	AA	AG	AG	GG	GG	AA	AA	GG	AG	GG	AA	AG	AA	AA	AG	AA	AG	GG	GG	AG	AA	AG	AG	AA
Gm15_44710289	Gm15	44710289	35.93	T	0.269231	TT	TC	TT	TT	TC	TC	CC	TT	TC	CC	TC	TC	TC	TT	TC	TC	CC	TC	CC	TT	TT	TC	TC	CC	CC	TT	TT	CC	TC	CC	TT	TC	TT	TT	TC	TT	TC	CC	CC	TC	TT	TC	TC	TT
Gm15_44625455	Gm15	44625455	36.14	T	0.273504	TT	TA	TT	TT	TA	TA	AA	TT	TA	AA	TA	TA	TA	TT	TA	TA	AA	TA	AA	TT	TT	TA	TA	AA	AA	TT	TT	AA	TA	AA	TT	TA	TT	TT	TA	TT	TA	AA	AA	TA	TT	TA	TA	TT
Gm15_44710269	Gm15	44710269	36.79	G	0.273504	GG	GA	GG	GG	GA	GA	AA	GG	GA	AA	GA	GA	GA	GG	GA	GA	AA	GA	AA	GG	GG	GA	GA	AA	AA	GG	GG	AA	GA	AA	GG	GA	GG	GG	GA	GG	GA	AA	AA	GA	GG	GA	GA	GG
Gm15_44130917	Gm15	44130917	37.01	T	0.273504	TT	TC	TT	TT	TC	TC	CC	TT	TC	CC	TC	TC	TT	TT	TC	TC	CC	TC	CC	TT	TT	TC	TC	CC	CC	TT	TT	CC	TC	CC	TT	TC	TT	TT	TC	TT	TC	CC	CC	TC	TT	TC	TC	TT
Gm15_46518294	Gm15	46518294	38.54	G	0.264957	GA	GA	GG	GG	GA	GA	AA	GG	GA	AA	GA	GA	GA	GG	GA	GG	AA	GA	AA	GG	GG	GA	GA	AA	AA	GG	GG	AA	GA	AA	GG	GA	GG	GG	GA	GG	GA	AA	AA	GA	GG	GA	GA	GG
Gm15_46633672	Gm15	46633672	38.75	C	0.269231	CT	CT	CC	CC	CT	CT	TT	CC	CT	TT	CT	CT	CT	CC	CT	CC	TT	CT	TT	CC	CC	CT	CT	TT	TT	CC	CC	TT	CT	TT	CC	CT	CC	CC	CT	CC	CT	TT	TT	CT	CC	CT	CT	CC
Gm15_46836417	Gm15	46836417	39.19	C	0.264957	CT	CT	CC	CC	CT	CT	TT	CC	CT	TT	CT	CT	CT	CC	CT	CC	TT	CT	TT	CC	CC	CT	CT	TT	TT	CC	CC	TT	CT	TT	CC	CT	CC	CC	CT	CC	CT	TT	TT	CT	CC	CT	CT	CC
Gm15_47619377	Gm15	47619377	40.06	T	0.269231	TC	TC	TT	TT	CC	TC	CC	TT	TC	CC	TC	TC	TC	TT	TC	TT	CC	TC	CC	TT	TT	TC	TC	TC	CC	TT	TT	CC	TC	CC	TT	TC	TT	TT	TC	TT	TC	CC	CC	TC	TT	TC	TC	TT
Gm15_47533583	Gm15	47533583	40.27	G	0.264957	GA	GA	GG	GG	GA	GA	AA	GG	GA	AA	GA	GA	GA	GG	GA	GG	AA	GA	AA	GG	GG	GA	GA	GA	AA	GG	GG	AA	GA	AA	GG	GA	GG	GG	GA	GG	GA	AA	AA	GA	GG	GA	GA	GG
Gm15_47445933	Gm15	47445933	42.02	T	0.299145	TA	TA	TT	TT	TA	TA	AA	TT	TA	AA	TA	TA	TA	TT	TT	TT	AA	TA	AA	TT	TT	TA	TA	TA	AA	TT	TT	AA	TA	AA	TT	TA	TT	TT	TA	TT	TA	AA	AA	TA	TT	TA	TA	TT
Gm15_47445940	Gm15	47445940	42.23	A	0.303419	AG	AG	AA	AA	AG	AG	GG	AA	AG	GG	AG	AG	AG	AA	AA	AA	GG	AG	GG	AA	AA	AG	AG	AG	GG	AA	AA	GG	AG	GG	AA	AG	AA	AA	AG	AA	AG	GG	GG	AG	AA	AG	AG	AA
Gm15_47445889	Gm15	47445889	43.97	A	0.269231	AT	AT	AA	AA	AT	AT	TT	AA	AT	TT	AT	AT	AT	AA	AT	AA	TT	AT	TT	AA	AA	AT	AT	AT	TT	AA	AA	TT	AT	TT	AA	AT	AA	AA	AT	AA	AT	TT	TT	AT	AA	AT	AT	AA
Gm15_47533595	Gm15	47533595	44.62	T	0.269231	TC	TC	TT	TT	TC	TC	CC	TT	TC	CC	TC	TC	TC	TT	TC	TT	CC	TC	CC	TT	TT	TC	TC	TC	CC	TT	TT	CC	TC	CC	TT	TC	TT	TT	TC	TT	TC	CC	CC	TC	TT	TC	TC	TT
Gm15_47173640	Gm15	47173640	44.84	C	0.273504	CA	CA	CC	CC	CA	CA	AA	CC	CA	AA	CA	CA	CA	CC	CA	CC	AA	CA	AA	CC	CC	CA	CA	AA	AA	CC	CC	AA	CA	AA	CC	CA	CC	CC	CA	CC	CA	AA	AA	CA	CC	CA	CA	CC
Gm15_9059187	Gm15	9059187	88.22	G	0.294872	GA	GA	AA	AA	GG	GA	GA	AA	GA	GG	GA	GG	GA	AA	GA	AA	GG	GA	GA	AA	GA	GA	GA	GG	GA	GA	GA	GA	AA	GA	GA	GG	GA	AA	GA	GG	GA	GG	GG	GA	AA	GG	GA	AA
Gm15_8515953	Gm15	8515953	94.03	C	0.290598	CA	CA	CC	CC	AA	CA	CA	CC	CA	AA	CA	CA	CA	CC	CA	CC	AA	CA	CA	CA	CA	CA	CA	AA	CA	CA	CA	CA	CA	AA	CA	AA	CA	CA	CA	AA	CA	AA	AA	AA	CC	AA	CA	CC
Gm15_8384167	Gm15	8384167	95.34	A	0.282051	AT	AT	AA	AA	AT	AT	AT	AA	AT	TT	AT	AT	AT	AA	AT	AA	TT	AT	AT	AT	AT	AT	AT	TT	AT	AT	AT	AT	AT	TT	AT	TT	AT	AT	AT	TT	AT	TT	TT	TT	AA	TT	AT	AA
Gm15_8211860	Gm15	8211860	96.65	A	0.277778	AC	AC	AA	AA	AC	AC	AC	AA	AC	CC	AC	AC	AC	AA	AC	AA	CC	AC	AC	AC	AC	AC	AC	CC	AC	CC	AC	AA	AC	CC	AC	CC	AC	AC	AC	CC	AC	CC	CC	CC	AA	CC	AC	AA
Gm15_7992834	Gm15	7992834	97.95	T	0.269231	TC	TC	CC	CC	TC	TC	TC	CC	TC	TT	TC	TC	TC	CC	TC	TC	TT	TC	TC	TC	TC	TC	TC	TT	TC	TT	TC	CC	TC	TT	TC	TT	TC	TC	TC	TT	TC	TT	TT	TT	CC	TT	TC	CC
Gm15_7767963	Gm15	7767963	98.38	A	0.269231	AG	AG	AA	AA	AG	AG	AG	AA	AG	GG	AG	AG	AG	AA	AG	AG	GG	AG	AG	AG	AG	AG	AG	GG	AG	GG	AG	AA	AG	GG	AG	GG	AG	AG	AG	GG	AG	GG	GG	GG	AA	GG	AG	AA
Gm15_7698212	Gm15	7698212	98.59	A	0.264957	AG	AG	AA	AA	AG	AG	AG	AA	AG	GG	AG	AG	AG	AA	AG	AG	GG	AG	AG	AG	AG	AG	AG	GG	AG	GG	AG	AA	AG	GG	AG	GG	AG	AG	AG	GG	AG	GG	GG	GG	AA	GG	AG	AA
Gm15_7548507	Gm15	7548507	99.46	T	0.260684	TC	TC	TC	CC	TC	TC	TC	CC	TC	TT	TC	TC	TC	CC	TC	TC	TT	TC	TC	TC	TC	TC	TC	TT	TC	TT	TC	CC	TC	TT	TC	TT	TC	TC	TC	TT	TC	TT	TT	TT	CC	TT	TC	CC
Gm15_7620447	Gm15	7620447	99.68	C	0.264957	CT	CT	CT	TT	CT	CT	CT	TT	CT	CC	CT	CT	CT	TT	CT	CT	CC	CT	CT	CT	CT	CT	CT	CC	CT	CC	CT	TT	CT	CC	CT	CC	CT	CT	CT	CC	CT	CC	CC	CC	TT	CC	CT	TT
Gm15_7473782	Gm15	7473782	100.33	C	0.25641	CT	CT	CT	TT	CT	CT	CT	TT	CT	CC	CT	CT	CT	TT	CT	CT	CT	CT	CT	CT	CT	CT	CT	CC	CT	CC	CT	TT	CT	CC	CT	CC	CT	CT	CT	CC	CT	CC	CC	CC	TT	CC	CT	TT
Gm15_7473833	Gm15	7473833	100.55	A	0.260684	AT	AT	AT	TT	AT	AT	AT	TT	AT	AA	AT	AT	AT	TT	AT	AT	AT	AT	AT	AT	AT	AT	AT	AA	AT	AA	AT	TT	AT	AA	AT	AA	AT	AT	AT	AA	AT	AA	AA	AA	TT	AA	AT	TT
Gm15_7308933	Gm15	7308933	102.74	T	0.273504	TC	TC	TC	CC	TC	TC	TC	CC	TC	TT	TC	TC	TC	CC	TC	TC	TT	TC	TT	TC	TC	TC	TC	TT	TC	TT	TC	CC	TC	TT	TC	TT	TC	TC	TC	TT	TC	TT	TT	TT	CC	TT	TC	CC
Gm15_7315922	Gm15	7315922	103.83	C	0.260684	CT	CT	CT	TT	CT	CT	CT	TT	CT	CC	CT	CT	CT	TT	CT	CT	CT	CT	CT	CT	CT	CT	CT	CC	CT	CC	CT	TT	CT	CC	CT	CC	CT	CT	CT	CC	CT	CC	CC	CC	TT	CC	CT	TT
Gm15_7315962	Gm15	7315962	104.26	C	0.25641	CT	CT	CT	TT	CT	CT	CT	TT	CT	CC	CT	CT	CT	TT	CT	CT	CT	CT	CT	CT	CT	CT	CT	CC	CT	CC	CT	TT	CT	CC	CT	CC	CT	CT	CT	CC	CT	CC	CC	CC	TT	CC	CT	TT
Gm15_7193767	Gm15	7193767	104.91	C	0.252137	CA	CA	CA	CC	CA	CA	CA	CC	CA	AA	CA	CA	CA	CC	CA	CA	CA	CA	CA	CA	CA	CA	CA	AA	CA	AA	CA	CC	CA	AA	CA	AA	CA	CA	CA	AA	CA	AA	AA	AA	CC	AA	CA	CC
Gm15_7193725	Gm15	7193725	109.12	A	0.320513	AG	AG	AG	AA	AG	AG	AG	AA	AG	GG	AA	AG	AG	AA	AG	AG	AG	AA	AG	AG	AG	AG	AG	GG	AG	GG	AG	AA	AG	GG	AG	GG	AG	AG	AG	GG	AG	GG	GG	GG	AA	GG	AG	AA
Gm15_5895405	Gm15	5895405	119.77	C	0.239316	CT	CT	CT	TT	CT	CT	CT	TT	CT	CC	CT	CT	CT	TT	CT	CT	TT	CT	CT	CT	CT	CT	CC	CT	CT	CC	CT	TT	CT	CC	CT	CT	CT	CT	CT	CC	CT	CC	CC	CC	TT	TT	CT	TT
Gm15_5535516	Gm15	5535516	120.2	C	0.239316	CT	CT	CT	TT	CT	CT	CT	TT	CT	CC	CT	CT	CT	TT	CT	CT	TT	CT	CT	CT	CT	CT	CC	CT	CT	CC	CT	TT	CT	CC	CT	CT	CT	CT	CT	CC	CT	CC	CC	CC	TT	TT	CT	TT
Gm15_4946031	Gm15	4946031	123.28	C	0.252137	CA	CA	CA	AA	CA	CA	CA	AA	CA	CC	CA	CA	CA	AA	CA	CA	AA	CA	CA	CA	CA	CA	CC	CA	CA	CC	CA	CA	CA	CC	CA	CA	CA	CA	CA	CC	CA	CC	CC	CC	AA	AA	CA	AA
Gm15_4916033	Gm15	4916033	123.5	T	0.247863	TG	TG	TG	GG	TG	TG	TG	GG	TG	TT	TG	TG	TG	GG	TG	TG	GG	TG	TG	TG	TG	TG	TT	TG	TG	TT	TG	TG	TG	TT	TG	TG	TG	TG	TG	TT	TG	TT	TG	TT	GG	GG	TG	GG
Gm15_4836857	Gm15	4836857	130.03	A	0.311966	AG	AG	AG	GG	GG	AG	AG	GG	AG	AA	AG	GG	AG	GG	GG	AG	GG	AG	AG	GG	AG	AG	AA	AG	AG	AA	AG	AG	AG	AA	AG	GG	AG	GG	AG	GG	GG	AA	GG	AA	GG	GG	AA	GG
Gm15_583964	Gm15	583964	165.41	G	0.282051	GA	GG	AA	AA	AA	GA	AA	AA	AA	GA	AA	AA	GG	GA	GG	GA	AA	AA	GA	GG	GA	GA	GA	AA	GA	GG	GA	GA	GA	GG	GA	AA	GG	GG	AA	GA	GA	GG	AA	GG	AA	GA	GA	AA
Gm16_37769926	Gm16	37769926	0	A	0.32906	AA	AA	AG	AA	GG	AG	AG	GG	AG	GG	GG	GG	GG	AG	AG	GG	AG	AG	GG	AG	AG	AG	AG	AA	AG	GG	AG	AG	AG	AA	AG	AG	AG	GG	AG	AG	AG	AA	GG	AG	AA	AA	GG	GG
Gm16_37458006	Gm16	37458006	1.97	C	0.333333	CC	CC	CT	CC	TT	CT	TT	TT	CT	TT	TT	TT	TT	CT	CT	TT	CT	CC	TT	CT	CT	CT	CT	CC	CT	TT	CT	CT	CT	CC	CT	CT	CT	TT	CT	CC	CT	CC	TT	CT	CC	CC	TT	TT
Gm16_37383440	Gm16	37383440	2.4	T	0.337607	TT	TT	TC	TT	CC	TC	CC	CC	TC	CC	CC	CC	CC	TC	TC	CC	TC	TT	CC	TC	TC	TC	TC	TT	TC	CC	TC	TC	TC	TT	TC	TC	TC	CC	TC	TT	TC	TT	CC	TC	TT	TT	CC	CC
Gm16_37237391	Gm16	37237391	2.83	C	0.337607	CC	CC	CT	CC	TT	CT	TT	TT	CT	TT	TT	TT	TT	CT	CT	TT	CT	CC	TT	CT	CT	CT	CT	CC	CT	CT	CT	CT	CT	CC	CT	CT	CT	TT	CT	CC	CT	CC	TT	CT	CC	CC	TT	TT
Gm16_36755515	Gm16	36755515	6.58	G	0.32906	GG	GG	GC	GG	CC	GC	CC	CC	GC	CC	CC	CC	CC	GC	GC	CC	GC	GG	CC	GC	GC	GC	GC	GC	GC	GC	GC	GC	GC	GG	GC	GC	GG	GC	GC	GG	GC	GG	CC	GC	GC	GG	CC	CC
Gm16_36664057	Gm16	36664057	7.23	G	0.333333	GG	GG	GA	GG	AA	GA	AA	AA	GA	AA	AA	AA	AA	GG	GA	AA	GA	GG	AA	GA	GA	GG	GA	GA	GA	GA	GA	GA	GA	GG	GA	GA	GG	GA	GA	GG	GA	GG	AA	GA	GA	GG	AA	AA
Gm16_36602559	Gm16	36602559	7.88	T	0.333333	TT	TT	TG	TT	GG	TG	GG	GG	TG	GG	GG	GG	GG	TT	TG	TG	TG	TT	GG	TG	TG	TT	TG	TG	TG	TG	TG	TG	TG	TT	TG	TG	TT	TG	TG	TT	TG	TT	GG	TG	TG	TT	GG	GG
Gm16_36413214	Gm16	36413214	8.53	G	0.333333	GG	GG	GA	GG	AA	GA	AA	AA	GA	AA	AA	AA	AA	GG	GA	GA	GA	GG	AA	GA	GA	GG	GA	GA	GA	GA	GA	GA	GA	GG	GA	GA	GG	GA	GA	GG	GA	GG	AA	GA	GA	GG	AA	AA
Gm16_36484443	Gm16	36484443	8.75	A	0.333333	AA	AA	AT	AA	TT	AT	TT	TT	AT	TT	TT	TT	TT	AA	AT	AT	AT	AA	TT	AT	AT	AA	AT	AT	AT	AT	AT	AT	AT	AA	AT	AT	AA	AT	AT	AA	AT	AA	TT	AT	AT	AA	TT	TT
Gm16_35206608	Gm16	35206608	26.7	C	0.32906	TT	TT	CT	TT	CC	CT	CC	CC	CT	TT	CC	CC	CC	TT	CT	CT	CC	CC	CC	CT	CT	TT	CT	CT	CT	CT	CT	CT	CC	CC	CT	CT	TT	TT	CT	TT	CT	TT	CC	CC	CT	TT	CT	TT
Gm16_35656344	Gm16	35656344	29.35	C	0.277778	CC	CC	CA	CC	AA	CA	AA	AA	CA	CC	AA	AA	AA	CC	CA	CA	AA	CA	AA	CA	CA	CC	CA	CA	CA	CA	CA	CA	AA	AA	CA	CA	CC	CC	CA	CC	CA	CC	AA	AA	CA	CC	CA	CC
Gm16_35529432	Gm16	35529432	31.09	T	0.282051	TT	TT	TC	TT	CC	TC	CC	CC	TC	TT	CC	CC	CC	TT	TC	TT	CC	TC	CC	TC	TC	TT	TC	TC	TC	TC	TC	TC	CC	CC	TC	TC	TT	TT	TC	TT	TC	TT	CC	CC	TC	TT	TC	TT
Gm16_35529417	Gm16	35529417	31.53	C	0.282051	CC	CC	CC	CC	TT	CT	TT	TT	CT	CC	TT	TT	TT	CC	CT	CC	TT	CT	TT	CT	CT	CC	CT	CT	CT	CT	CT	CT	TT	TT	CT	CT	CC	CC	CT	CC	CT	CC	TT	TT	CT	CC	CT	CC
Gm16_35529489	Gm16	35529489	33.27	G	0.290598	GG	GG	GT	GG	TT	GT	TT	TT	GT	GG	TT	TT	TT	GG	GT	GG	TT	GT	TT	GT	GT	GG	GT	GT	GT	GT	GT	GT	TT	TT	GT	GT	GG	GG	GT	GG	GT	GG	TT	TT	GT	GG	GT	GG
Gm16_35719846	Gm16	35719846	35.68	G	0.277778	GG	GG	GA	GG	AA	GA	AA	AA	GA	GG	AA	AA	AA	GG	GA	GA	AA	GA	AA	GA	GA	GG	GA	GA	GA	GA	GA	GA	AA	AA	GA	GA	GG	GG	GA	GG	GA	GG	AA	AA	GA	GG	GA	GG
Gm16_35170389	Gm16	35170389	37.21	T	0.303419	CC	CC	TC	CC	TT	TC	TT	TT	TC	CC	TT	TT	TT	CC	TC	TC	TT	TC	TT	TC	TC	CC	TC	TC	TC	TC	TC	TC	TT	TT	TC	TC	CC	CC	TC	CC	TC	CC	TT	TT	TT	CC	TT	CC
Gm16_35170416	Gm16	35170416	37.42	G	0.299145	AA	AA	GA	AA	GG	GA	GG	GG	GA	AA	GG	GG	GG	AA	GA	GA	GG	GA	GG	GA	GA	AA	GA	GA	GA	GA	GA	GA	GG	GG	GA	GA	AA	AA	GA	AA	GA	AA	GG	GG	GG	AA	GG	AA
Gm16_35170452	Gm16	35170452	37.86	A	0.290598	GG	GG	AG	GG	AA	AG	AA	AA	AG	GG	AA	AA	AA	GG	AG	AG	AA	AG	AA	AG	AG	GG	AG	AG	AG	AG	AG	AG	AA	AA	AG	AG	GG	GG	AG	GG	AG	GG	AA	AA	AG	GG	AG	GG
Gm16_34185795	Gm16	34185795	38.73	C	0.282051	CC	CC	CA	CC	AA	CA	AA	AA	CA	CC	AA	AA	AA	CC	CA	CA	AA	CA	AA	CA	CA	CC	CA	CA	CA	CA	CA	CA	AA	AA	CA	CA	CC	CC	CA	CC	CA	CC	AA	AA	CA	CC	CA	CC
Gm16_34070583	Gm16	34070583	39.82	C	0.269231	CC	CC	CT	CC	TT	CT	TT	TT	CT	CC	TT	TT	TT	CC	CT	CT	TT	CT	TT	CT	CT	CC	CT	CT	CT	CT	CT	CT	TT	TT	CT	CT	CC	CC	CT	CC	CT	CC	TT	TT	CT	CC	CT	CC
Gm16_34070567	Gm16	34070567	40.25	A	0.273504	AA	AA	AC	AA	CC	AC	CC	CC	AC	AA	CC	CC	CC	AA	AC	AC	CC	AC	CC	AC	AC	AA	AC	AC	AC	AC	AC	AC	CC	CC	AC	AC	AA	AA	AC	AA	AC	AA	CC	CC	AC	AA	AC	AA
Gm16_33362827	Gm16	33362827	43.55	T	0.277778	TT	TT	TG	TT	GG	TG	GG	GG	TG	TT	GG	GG	GG	TT	TG	TG	GG	TG	GG	TG	TG	TT	GG	TG	TG	TG	TG	TG	GG	GG	TG	GG	TT	TT	TG	TT	TG	TT	GG	GG	TG	TG	TG	TT
Gm16_33259663	Gm16	33259663	43.99	C	0.282051	CC	CC	CT	CC	TT	CT	TT	TT	CT	CC	TT	TT	TT	CC	CT	CT	TT	CT	TT	CT	CT	CC	TT	CT	CT	CT	CT	CT	TT	TT	CT	TT	CC	CC	CT	CC	CT	CC	TT	TT	CT	CT	CT	CC
Gm16_33128617	Gm16	33128617	44.2	A	0.282051	AA	AA	AT	AA	TT	AT	TT	TT	AT	AA	TT	TT	TT	AA	AT	AT	TT	AT	TT	AT	AT	AA	TT	AT	AT	AT	AT	AT	TT	TT	AT	TT	AA	AA	AT	AA	AT	AA	TT	TT	AT	AT	AT	AA
Gm16_32878077	Gm16	32878077	44.85	T	0.277778	TT	TT	TA	TT	AA	TA	AA	AA	TA	TT	AA	AA	AA	TT	TA	TA	AA	TA	AA	TA	TA	TT	TA	TA	TA	TA	TA	TA	AA	AA	TA	AA	TT	TT	TA	TT	TA	TT	AA	AA	TA	TA	TA	TT
Gm16_32693773	Gm16	32693773	45.28	T	0.277778	TT	TT	TC	TT	CC	TC	CC	CC	TC	TT	CC	CC	CC	TT	TC	TC	CC	TC	CC	TC	TC	TT	TC	TC	TC	TC	TC	TC	CC	CC	TC	CC	TT	TT	TC	TT	TC	TT	CC	CC	TC	TC	TC	TT
Gm16_32368899	Gm16	32368899	49.04	C	0.260684	CC	CC	CT	CT	TT	CT	TT	TT	CT	CC	TT	TT	TT	CC	CT	CT	TT	CT	TT	CT	CT	CC	CT	CT	CT	CT	CT	CT	TT	TT	CT	TT	CC	CC	CT	CC	CT	CC	TT	TT	CT	CT	CT	CC
Gm16_32368885	Gm16	32368885	50.35	C	0.247863	CC	CC	CA	CA	AA	CA	AA	CC	CA	CC	AA	AA	AA	CC	CA	CA	AA	CA	AA	CA	CA	CC	CA	CA	CA	CA	CA	CA	AA	CA	CA	AA	CC	CC	CA	CC	CA	CC	AA	AA	CA	CA	CA	CC
Gm16_31855049	Gm16	31855049	55.24	G	0.307692	GA	GG	GA	GG	AA	GA	AA	GG	GA	GG	AA	AA	AA	GG	GG	GA	AA	GA	AA	GA	GA	GG	GA	GA	GA	GA	GA	GA	AA	GA	GA	AA	GG	GG	GA	GG	GA	GG	AA	AA	GA	GA	GA	GG
Gm16_31855004	Gm16	31855004	57.87	C	0.324786	CT	CC	CT	CC	TT	CT	TT	CC	CT	CC	TT	TT	TT	CC	CC	CT	TT	CT	TT	CT	CT	CC	CT	CT	CT	CT	CT	CT	TT	CT	CT	TT	CC	CC	CT	CC	CT	CC	TT	TT	CT	CT	CC	CC
Gm16_31854963	Gm16	31854963	60.06	G	0.299145	GC	GG	GC	GC	CC	GC	CC	GG	GC	GG	CC	CC	CC	GG	GG	GC	CC	GC	CC	GC	GC	GG	GC	GC	GC	GC	GC	GC	CC	GC	GC	CC	GG	GG	GC	GG	GC	GG	CC	CC	GC	GC	GC	GG
Gm16_31841822	Gm16	31841822	63.14	A	0.252137	AT	AA	AT	AT	TT	AT	TT	AA	AT	AA	TT	TT	TT	AA	AA	AT	TT	AT	TT	AT	AT	AA	AT	AT	AT	AT	AT	AT	TT	AT	AT	TT	AA	AA	AT	AA	AT	AA	TT	TT	AT	AT	AT	AA
Gm16_31590373	Gm16	31590373	66.66	T	0.311966	TC	TT	TC	TC	CC	TC	CC	TT	TC	TT	CC	CC	CC	TT	TT	TC	CC	TC	CC	TT	TT	TT	TC	TT	TC	TC	TC	TC	CC	TT	TT	CC	TT	TT	TC	TT	TC	TT	CC	CC	TC	TC	TT	TT
Gm16_31590344	Gm16	31590344	67.75	C	0.316239	CA	CC	CA	CA	AA	CA	AA	CC	CA	CC	AA	AA	AA	CC	CC	CA	AA	CA	AA	CA	CC	CC	CA	CC	CA	CA	CA	CA	AA	CC	CC	AA	CC	CC	CC	CC	CA	CC	AA	AA	CA	CA	CC	CC
Gm16_31590325	Gm16	31590325	69.95	C	0.324786	CG	CC	CG	CG	GG	CG	GG	CC	CG	CC	GG	GG	GG	CC	CC	CG	GG	CG	GG	CC	CC	CC	CG	CC	CG	CG	CC	CG	GG	CC	CC	GG	CC	CC	CC	CC	CG	CC	GG	GG	CG	CG	CG	CC
Gm16_31458791	Gm16	31458791	73.94	G	0.260684	GT	GG	GT	GT	TT	GT	TT	GG	GT	GG	TT	TT	TT	GG	GG	GT	TT	GT	TT	GT	GG	GG	GT	GT	GT	GT	GT	GT	TT	GT	GT	TT	GG	GG	GT	GG	GT	GG	TT	TT	GT	GT	GT	GG
Gm16_30903345	Gm16	30903345	81.4	G	0.273504	GA	GG	AA	GA	AA	GA	AA	AA	GG	GG	GA	AA	AA	GG	GG	GA	AA	GA	GA	GA	GG	GA	GA	GA	AA	GG	GA	AA	AA	AA	GA	AA	GG	GG	GA	GG	GG	GG	AA	AA	GA	GA	GG	GG
Gm16_30958559	Gm16	30958559	81.62	A	0.269231	AG	AA	GG	AG	GG	AG	GG	GG	AA	AA	AG	GG	GG	AA	AA	AG	GG	AG	AG	AG	AA	AG	AG	AG	GG	AA	AG	GG	GG	GG	AG	GG	AA	AA	AG	AA	AA	AA	GG	GG	AG	AG	AA	AA
Gm16_30825959	Gm16	30825959	82.93	C	0.269231	CT	CC	TT	CT	TT	CT	TT	CC	CC	CC	CT	TT	TT	CC	CC	CT	TT	CT	CT	CT	CC	CT	CT	CT	TT	CC	CT	TT	TT	CT	CT	TT	CC	CC	CT	CC	CC	CC	TT	TT	CT	CT	CC	CC
Gm16_30660108	Gm16	30660108	84.45	A	0.277778	AC	AC	AA	AC	AA	AC	AA	CC	CC	CC	AC	AA	AA	CC	CC	AC	AA	AC	AC	AC	CC	AC	AC	AC	AA	CC	AC	AA	AA	AC	AC	AA	CC	CC	AC	CC	CC	CC	AA	AA	AC	AC	CC	CC
Gm16_28928374	Gm16	28928374	96.93	A	0.260684	AG	AA	AA	AG	AA	AA	AG	AA	GG	GG	AG	AA	AA	GG	GG	AG	AG	AG	AG	GG	GG	AA	AG	AG	AA	GG	AG	AA	AA	AA	AG	AA	GG	GG	AG	AG	AG	AG	AA	AA	AG	AG	GG	GG
Gm16_28766868	Gm16	28766868	97.36	C	0.269231	CT	CC	CC	CT	CC	CC	CT	CC	TT	TT	CT	CC	CC	TT	TT	CT	CT	CT	CT	TT	TT	CC	CT	CT	CC	TT	CT	CC	CC	CC	CT	CC	TT	TT	CT	CT	CT	CT	CC	CC	CC	CT	TT	TT
Gm16_28620393	Gm16	28620393	98.01	A	0.269231	AG	AA	AA	AG	AA	AA	AG	AA	GG	GG	AG	AA	AA	GG	GG	AG	AG	AG	AG	GG	GG	AA	AG	AG	AA	GG	AG	AA	AA	AA	AG	AA	AG	GG	AG	AG	AG	AG	AA	AA	AA	AG	GG	GG
Gm16_28539187	Gm16	28539187	98.44	G	0.264957	GA	GG	GG	GA	GG	GG	GA	GG	AA	AA	GA	GG	GG	AA	AA	GA	GA	GA	GA	AA	AA	GG	GA	GA	GG	AA	GA	GG	GG	GG	GA	GG	GA	AA	GA	GA	GA	GA	GG	GG	GG	GA	AA	AA
Gm16_28424754	Gm16	28424754	98.66	A	0.264957	AT	AA	AA	AT	AA	AA	AT	AA	TT	TT	AT	AA	AA	TT	TT	AT	AT	AT	AT	TT	TT	AA	AT	AT	AA	TT	AT	AA	AA	AA	AT	AA	AT	TT	AT	AT	AT	AT	AA	AA	AA	AT	TT	TT
Gm16_28282408	Gm16	28282408	99.53	T	0.277778	TC	TT	TT	TC	TT	TT	TC	TT	CC	CC	TC	TT	TT	CC	CC	TC	TC	TC	TC	CC	CC	TT	TC	TC	TT	CC	TC	TT	TT	TT	TT	TT	TC	CC	TC	TC	TC	TC	TT	TT	TT	TC	CC	CC
Gm16_27633513	Gm16	27633513	99.75	C	0.277778	CT	CC	CC	CT	CC	CC	CT	CC	TT	TT	CT	CC	CC	TT	TT	CT	CT	CT	CT	TT	TT	CC	CT	CT	CC	TT	CT	CC	CC	CC	CC	CC	CT	TT	CT	CT	CT	CT	CC	CC	CC	CT	TT	TT
Gm16_27756657	Gm16	27756657	99.96	G	0.273504	GA	GG	GG	GA	GG	GG	GA	GG	AA	AA	GA	GG	GG	AA	AA	GA	GA	GA	GA	AA	AA	GG	GA	GA	GG	AA	GA	GG	GG	GG	GG	GG	GA	AA	GA	GA	GA	GA	GG	GG	GG	GA	AA	AA
Gm16_27507860	Gm16	27507860	100.18	G	0.277778	GT	GG	GG	GT	GG	GG	GT	GG	TT	TT	GT	GG	GG	TT	TT	GT	GT	GT	GT	TT	TT	GG	GT	GT	GG	TT	GT	GG	GG	GG	GG	GG	GT	TT	GT	GT	GT	GT	GG	GG	GG	GT	TT	TT
Gm16_27391129	Gm16	27391129	100.61	A	0.277778	AG	AA	AA	AG	AA	AA	AG	AA	GG	GG	AG	AA	AA	GG	GG	AG	AG	AG	AG	GG	GG	AA	AG	AG	AA	GG	AG	AA	AA	AA	AA	AA	AG	GG	AG	AG	AG	AG	AA	AA	AA	AG	GG	GG
Gm16_27391178	Gm16	27391178	101.26	G	0.269231	GA	GG	GG	GA	GG	GG	GA	GG	AA	AA	GA	GG	GG	AA	AA	GA	GA	GA	GA	AA	AA	GG	GA	GA	GG	AA	GA	GG	GG	GG	GG	GG	GA	AA	GA	GA	GA	GA	GG	GG	GG	GA	AA	AA
Gm16_25116397	Gm16	25116397	103.01	T	0.277778	TC	TT	TT	TC	TT	TT	TT	TT	CC	CC	TC	TT	TT	CC	CC	TC	TC	TC	TC	CC	CC	TT	TC	TC	TT	CC	CC	TT	TT	TT	TT	TT	TC	CC	TC	TC	TC	TC	TT	TT	TT	TC	CC	CC
Gm16_25116418	Gm16	25116418	103.23	C	0.282051	CT	CC	CC	CT	CC	CC	CC	CC	TT	TT	CT	CC	CC	TT	TT	CT	CT	CT	CT	TT	TT	CC	CT	CT	CC	TT	TT	CC	CC	CC	CC	CC	CT	TT	CT	CT	CT	CT	CC	CC	CC	CT	TT	TT
Gm16_25116420	Gm16	25116420	103.44	G	0.286325	GA	GG	GG	GA	GG	GG	GG	GG	AA	AA	GA	GG	GG	AA	AA	GA	GA	GA	GA	AA	AA	GG	GA	GA	GG	AA	AA	GG	GG	GG	GG	GG	GA	AA	GA	GA	GA	GA	GG	GG	GG	GA	AA	AA
Gm16_25498598	Gm16	25498598	104.75	A	0.273504	AC	AA	AA	AC	AA	AA	AA	AA	CC	CC	AC	AA	AA	CC	CC	AC	AC	AC	AC	CC	CC	AA	AC	AC	AA	CC	CC	AA	AA	AA	AA	AA	AC	CC	AC	AC	AC	AC	AA	AA	AA	AC	AA	CC
Gm16_25909165	Gm16	25909165	105.84	A	0.282051	AT	AA	AA	AT	AA	AA	AA	AA	TT	TT	AT	AA	AA	TT	TT	AT	AT	AT	AT	TT	TT	AA	AT	AT	AA	TT	TT	AA	AA	AA	AA	AA	AT	TT	AT	AT	AT	AT	AA	AA	AA	AT	TT	TT
Gm16_25288322	Gm16	25288322	106.49	G	0.269231	GA	GG	GG	GA	GG	GG	GG	GG	AA	AA	GA	GG	GG	AA	AA	GA	GA	GA	GA	AA	AA	GG	GA	GA	GG	AA	AA	GG	GG	GG	GG	GG	GA	AA	GA	GA	GA	GA	GG	GG	GG	GA	AA	AA
Gm16_24879088	Gm16	24879088	106.71	T	0.264957	TG	TT	TT	TG	TT	TT	TT	TT	GG	GG	TG	TT	TT	GG	GG	TG	TG	TG	TG	GG	GG	TT	TG	TG	TT	GG	GG	TT	TT	TT	TT	TT	TG	GG	TG	TG	TG	TG	TT	TT	TT	TG	GG	GG
Gm16_23824029	Gm16	23824029	107.58	A	0.277778	AC	AA	AA	AC	AA	AA	AA	AA	CC	CC	AC	AA	AA	CC	CC	AC	AC	AC	AC	CC	CC	AA	AC	AC	AA	CC	CC	AA	AA	AA	AA	AA	AC	CC	AC	AC	AC	AC	AA	AA	AA	AC	CC	CC
Gm16_23317177	Gm16	23317177	108.23	G	0.273504	GA	GG	GG	GA	GG	GG	GG	GG	AA	AA	GA	GG	GG	AA	AA	GA	GA	GA	GA	AA	AA	GG	GA	GA	GG	AA	AA	GG	GG	GG	GG	GG	GA	AA	GA	GA	GA	GA	GG	GG	GG	GA	AA	AA
Gm16_23890170	Gm16	23890170	108.44	T	0.269231	TC	TT	TT	TC	TT	TT	TT	TT	CC	CC	TC	TT	TT	CC	CC	TC	TC	TC	TC	CC	CC	TT	TC	TC	TT	CC	CC	TT	TT	TT	TT	TT	TC	CC	TC	TC	TC	TC	TT	TT	TT	TC	CC	CC
Gm16_23986754	Gm16	23986754	109.77	G	0.294872	GA	GG	GG	GA	GG	GG	GG	GG	AA	AA	GA	GG	GG	AA	AA	GA	GA	GG	GA	AA	AA	GG	GG	GA	GG	AA	AA	GG	GG	GG	GG	GG	GA	AA	GA	GA	GA	GA	GG	GG	GG	GA	AA	AA
Gm16_24192492	Gm16	24192492	113.8	T	0.333333	TC	TT	TT	TC	TT	TT	TT	TT	CC	CC	TC	TT	TT	CC	CC	TT	TC	TC	TC	CC	CC	TT	TC	TC	TT	CC	CC	TT	TT	TT	TT	TT	TC	CC	TC	TC	TC	TT	TT	TT	TT	TC	CC	CC
Gm16_24192505	Gm16	24192505	115.54	A	0.333333	AG	AA	AA	AG	AA	AA	AA	AA	GG	GG	AG	AA	AA	GG	GG	AG	AG	AG	AG	GG	GG	AA	AG	AG	AA	GG	GG	AA	AA	AA	AA	AA	AG	GG	AG	AG	AG	AA	AA	AA	AA	AG	GG	GG
Gm16_22694229	Gm16	22694229	119.62	A	0.324786	AT	AA	AA	AT	AA	AA	AA	AA	TT	TT	AT	AA	AA		TT	AT	AT	AT	AT	TT	TT	AA	AT	AT	AA	TT	TT	AA	AA	AA	AA	AA	AT	TT	AT	AT	AT	AT	AA	AA	AA	AT	TT	TT
Gm16_26280150	Gm16	26280150	123.7	A	0.303419	AT	AA	AA	AT	AA	AA	AA	AA	TT	TT	AT	AA	AA	TT	TT	AT	AT	AT	AT	TT	TT	AA	AT	AA	AA	TT	TT	AA	AA	AA	AA	AA	AT	TT	AT	AT	AT	AT	AA	AA	AA	AT	TT	TT
Gm16_26280187	Gm16	26280187	124.57	A	0.320513	AC	AA	AA	AC	AA	AA	AA	AA	CC	CC	AC	AA	AA	CC	CC	AC	AC	AC	AC	CC	CC	AA	AC	AA	AA	CC	CC	AA	AA	AA	AA	AA	AC	CC	AC	AC	AC	AC	AA	AA	AA	AC	CC	CC
Gm16_25859298	Gm16	25859298	127.43	A	0.273504	AG	AA	AA	AG	AA	AA	AA	AA	GG	GG	AG	AA	AA	GG	GG	AG	AG	AG	AG	GG	GG	AA	AG	AG	AA	GG	GG	AA	AA	AA	AA	AA	AG	GG	AG	AG	AG	AG	AA	AA	AA	AG	GG	GG
Gm16_26219278	Gm16	26219278	127.86	A	0.269231	AT	AA	AA	AT	AA	AA	AA	AA	TT	TT	AT	AA	AA	TT	TT	AT	AT	AT	AT	TT	TT	AA	AT	AT	AA	TT	TT	AA	AA	AA	AA	AA	AT	TT	AT	AT	AT	AT	AA	AA	AA	AT	TT	TT
Gm16_27007281	Gm16	27007281	129.83	A	0.25641	AG	GG	GG	AG	GG	GG	GG	AA	AA	AA	AG	GG	GG	AA	AA	AG	AG	AG	AG	AA	AA	GG	AG	AG	GG	AA	AA	GG	GG	AG	GG	GG	AG	AA	AG	AG	AG	AG	GG	GG	GG	AG	AA	AA
Gm16_26919539	Gm16	26919539	131.36	A	0.269231	AG	AA	AA	AG	AA	AA	AA	AA	GG	GG	AG	AA	AA	GG	GG	AG	AG	AG	AG	GG	GG	AA	AG	AG	AA	GG	GG	AA	AA	AA	AA	AA	AG	GG	AG	AG	AG	AG	AA	AA	AA	AG	GG	GG
Gm16_27128815	Gm16	27128815	133.32	C	0.307692	CT	CC	CC	CT	CC	CC	CC	CC	TT	TT	CT	CC	CC	TT	TT	CT	CT	CT	CT	TT	TT	CC	CT	CT	CC	TT	TT	CC	CC	CC	CC	CC	CT	TT	CT	CT	CT	CT	CC	CC	CC	CT	TT	TT
Gm16_27128810	Gm16	27128810	134.41	C	0.307692	CT	CC	CC	CT	CC	CC	CC	CC	TT	TT	CT	CC	CC	TT	TT	CT	CT	CT	CT	TT	TT	CC	CT	CT	CC	TT	TT	CC	CC	CC	CC	CC	CT	TT	CT	CT	CT	CT	CC	CC	CC	CT	TT	TT
Gm16_27128792	Gm16	27128792	135.06	A	0.294872	AG	AA	AA	AG	AA	AA	AA	AA	GG	GG	AG	AA	AA	GG	GG	AG	AG	AG	AG	GG	GG	AA	AG	AG	AA	GG	GG	AA	AA	AA	AA	AA	AG	GG	AG	AG	AG	AG	AA	AA	AA	AG	GG	GG
Gm16_26809174	Gm16	26809174	136.59	G	0.273504	GA	AA	AA	GA	AA	AA	AA	AA	GG	GG	GA	AA	AA	GG	GG	GA	GA	GA	GA	GG	GG	AA	GA	GA	AA	GG	GG	AA	AA	AA	AA	AA	GA	GG	GA	GA	GA	GA	AA	AA	AA	GA	GG	GG
Gm16_25042445	Gm16	25042445	137.9	C	0.286325	CT	CC	CC	CT	CC	CC	CC	CC	TT	TT	CT	CC	CC	TT	TT	CT	CT	CT	CT	TT	TT	CC	CT	CT	CC	TT	TT	CC	CC	CC	CC	CC	CT	TT	CT	CT	CT	CT	CC	CC	CC	CT	TT	TT
Gm16_23175579	Gm16	23175579	140.1	C	0.294872	CG	CC	CC	CG	CC	CC	CC	CC	GG	GG	CG	CC	CC	GG	GG	CG	CG	CG	CG	GG	GG	CC	CG	CG	CC	GG	GG	CC	CC	CC	CC	CC	CG	GG	CG	CG	CG	CG	CC	CC	CC	CG	GG	GG
Gm16_23175583	Gm16	23175583	140.32	C	0.290598	CT	CC	CC	CT	CC	CC	CC	CC	TT	TT	CT	CC	CC	TT	TT	CT	CT	CT	CT	TT	TT	CC	CT	CT	CC	TT	TT	CC	CC	CC	CC	CC	CT	TT	CT	CT	CT	CT	CC	CC	CC	CT	TT	TT
Gm16_22220295	Gm16	22220295	141.41	C	0.282051	CT	CC	CC	CT	CC	CC	CC	CC	TT	TT	CT	CC	CC	TT	TT	CT	CT	CT	CT	TT	TT	CC	CT	CT	CC	TT	TT	CC	CC	CC	CC	CC	CT	TT	CT	CT	CT	CT	CC	CC	CC	CT	TT	TT
Gm16_22491883	Gm16	22491883	141.84	C	0.273504	CT	CC	CC	CT	CC	CC	CC	CC	TT	TT	CT	CC	CC	TT	TT	CT	CT	CT	CT	TT	TT	CC	CT	CT	CC	TT	TT	CC	CC	CC	CC	CC	CT	TT	CT	CT	CT	CT	CC	CC	CC	CT	TT	TT
Gm16_21823423	Gm16	21823423	142.05	A	0.269231	AG	AA	AG	AG	AA	AA	AA	AA	GG	GG	AG	AA	AA	GG	GG	AG	AG	AG	AG	GG	GG	AA	AG	AG	AA	GG	GG	AA	AA	AA	AA	AA	AG	GG	AG	AG	AG	AG	AA	AA	AA	AG	GG	GG
Gm16_21310670	Gm16	21310670	142.27	A	0.269231	AC	AA	AC	AC	AA	AA	AA	AA	CC	CC	AC	AA	AA	CC	CC	AC	AC	AC	AC	CC	CC	AA	AC	AC	AA	CC	CC	AA	AA	AA	AA	AA	AC	CC	AC	AC	AC	AC	AA	AA	AA	AC	CC	CC
Gm16_21416358	Gm16	21416358	142.92	A	0.264957	AG	AA	AG	AG	AA	AA	AA	AA	GG	GG	AG	AA	AA	GG	GG	AG	AG	AG	AG	GG	GG	AA	AG	AG	AA	GG	GG	AA	AA	AA	AA	AA	AG	GG	AG	AG	AG	AG	AA	AA	AA	AG	GG	GG
Gm16_21230967	Gm16	21230967	145.33	C	0.264957	CT	TT	CT	CT	TT	TT	TT	TT	CC	CC	CT	TT	TT	CT	CC	CT	CT	CT	CT	CC	CC	TT	CT	CT	TT	CC	CC	TT	TT	TT	TT	TT	CT	CT	CT	CT	CT	CT	TT	TT	TT	CT	CC	CC
Gm16_8111960	Gm16	8111960	147.52	G	0.273504	GA	GG	GA	GA	GG	GG	GG	GG	AA	AA	GA	GG	GG	GA	GA	GA	GA	GA	GA	AA	AA	GG	GA	GA	GG	AA	AA	GG	GG	GG	GG	GG	GA	GA	GA	GG	GA	GA	GG	GG	GG	GA	AA	AA
Gm16_8172028	Gm16	8172028	147.96	C	0.277778	CT	CC	CT	CT	CC	CC	CC	CC	TT	TT	CT	CC	CC	CT	CT	CT	CT	CT	CT	TT	TT	CC	CT	CT	CC	TT	TT	CC	CC	CC	CC	CC	CT	CT	CT	CC	CT	CT	CC	CC	CC	CT	TT	TT
Gm16_8171997	Gm16	8171997	149.93	C	0.252137	CT	TT	CT	CT	TT	TT	TT	CC	CC	CC	CT	TT	TT	CT	CT	CT	CT	CT	CT	CC	CC	TT	CT	CT	TT	CC	CC	TT	TT	CT	TT	TT	CT	CT	CT	TT	CT	CT	TT	TT	TT	CT	CC	CC
Gm16_9983464	Gm16	9983464	150.58	G	0.25641	GA	AA	GA	GA	AA	AA	AA	GG	GG	GG	GA	AA	AA	GA	GG	GA	GA	GA	GA	GG	GG	AA	GA	GA	AA	GG	GG	AA	AA	GA	AA	AA	GA	GA	GA	AA	GA	GA	AA	AA	AA	GA	GG	GG
Gm16_8172048	Gm16	8172048	151.23	C	0.252137	CT	TT	CT	CT	TT	TT	TT	CC	CC	CC	CT	TT	TT	CT	CT	CT	CT	CT	CT	CC	CC	TT	CT	CT	TT	CC	CC	TT	TT	CT	TT	TT	CT	CT	CT	TT	CT	CT	TT	TT	TT	CT	CC	CC
Gm16_8171979	Gm16	8171979	151.66	G	0.252137	GA	AA	GA	GA	AA	AA	AA	GG	GG	GG	GA	AA	AA	GA	GA	GA	GA	GA	GA	GG	GG	AA	GA	GA	AA	GG	GG	AA	AA	GA	AA	AA	GA	GA	GA	AA	GA	GA	AA	AA	AA	GA	GG	GG
Gm16_8017168	Gm16	8017168	152.75	C	0.25641	CA	AA	CA	CA	AA	AA	AA	CC	CC	CC	CA	AA	AA	CA	CA	CA	CA	CA	CA	CC	CC	AA	CA	CA	AA	CC	CC	AA	AA	CA	AA	AA	CA	CA	CA	AA	CA	CA	AA	AA	AA	CA	CC	CC
Gm16_8017114	Gm16	8017114	154.71	T	0.282051	TC	TT	TC	TC	TT	TT	TT	TT	CC	CC	TC	TT	TT	TC	TC	TC	TC	TC	TC	CC	CC	TT	TC	TC	TT	CC	CC	TT	TT	TT	TT	TT	TC	TC	TC	TT	TC	TC	TT	TT	TT	TC	CC	CC
Gm16_7383446	Gm16	7383446	156.24	A	0.282051	AG	AA	AG	AG	AA	AA	AG	AA	GG	GG	AG	AA	AA	AG	AG	AG	AG	AG	AG	GG	GG	AA	AG	AG	AA	GG	GG	AA	AA	AA	AA	AA	AG	AG	AG	AA	AG	AG	AA	AA	AA	AA	GG	GG
Gm16_7033228	Gm16	7033228	156.67	G	0.286325	GC	GG	GC	GC	GG	GG	GC	GG	CC	GC	GC	GG	GG	GC	GC	GC	GC	GC	GC	CC	CC	GG	GC	GC	GG	CC	CC	GG	GG	GG	GG	GG	GC	GC	GC	GG	GC	GC	GG	GG	GG	GG	CC	CC
Gm16_7331819	Gm16	7331819	158.64	C	0.260684	CT	TT	CT	CT	TT	TT	CT	CC	CC	CC	CT	TT	TT	CT	CT	CT	CT	CT	CT	CC	CC	TT	CT	CT	TT	CC	CC	TT	TT	CT	TT	TT	CT	CT	CT	TT	CT	CT	TT	TT	TT	TT	CC	CC
Gm16_7516557	Gm16	7516557	161.33	G	0.273504	GA	AA	GA	GA	AA	AA	GA	GG	GG	GG	GA	AA	AA	GA	GA	GA	GA	GA	GA	GG	GG	AA	GA	GA	AA	GG	GG	AA	AA	GA	AA	AA	GA	GA	GA	AA	GA	GA	AA	AA	AA	GA	GG	GG
Gm16_6825892	Gm16	6825892	164.97	C	0.260684	CT	TT	CT	CT	TT	TT	CT	CC	CC	CT	CT	TT	TT	CT	CT	CT	CT	CT	CT	CC	CC	TT	CT	CT	TT	CC	CC	TT	TT	CT	TT	TT	CT	CT	CT	TT	CT	CT	TT	TT	TT	TT	CC	CC
Gm16_6583155	Gm16	6583155	167.63	C	0.247863	CG	GG	CG	CG	GG	GG	CG	CC	CC	CG	CG	GG	GG	CG	CG	CG	CG	CG	CC	CC	CC	GG	CG	CG	GG	CC	CC	GG	GG	CG	GG	GG	CG	CG	CG	GG	CG	CG	GG	GG	GG	GG	CC	CC
Gm16_6236689	Gm16	6236689	168.07	T	0.247863	TC	CC	TC	TC	CC	CC	TC	TT	TT	TC	TC	CC	CC	TC	TC	TC	TC	TC	TT	TT	TT	CC	TC	TC	CC	TT	TT	CC	CC	TC	CC	CC	TC	TC	TC	CC	TC	TC	CC	CC	CC	CC	TT	TT
Gm16_6236727	Gm16	6236727	169.59	T	0.269231	TC	TT	TC	TC	TT	TT	TC	TT	CC	TC	TC	TT	TT	TC	TC	TC	TC	TC	CC	CC	CC	TT	TC	TC	TT	CC	CC	TT	TT	TT	TT	TT	TC	TC	TC	TT	TC	TC	TT	TT	TT	TT	CC	CC
Gm16_6287812	Gm16	6287812	170.03	T	0.269231	TC	TT	TC	TC	TT	TT	TC	TT	CC	TC	TC	TT	TT	TC	TC	TC	TC	TC	CC	CC	CC	TT	TC	TC	TT	CC	CC	TT	TT	TT	TT	TT	TC	TC	TC	TT	TC	TC	TT	TT	TT	TT	CC	CC
Gm16_6123295	Gm16	6123295	171.12	G	0.260684	GA	GG	GA	GA	GG	GG	GA	GG	AA	GA	GA	GG	GG	GA	GA	GA	GA	GA	AA	AA	AA	GG	GA	GA	GG	AA	AA	GG	GG	GG	GG	GG	GA	GA	GA	GG	GA	GA	GG	GG	GG	GG	AA	AA
Gm16_6123248	Gm16	6123248	171.33	C	0.264957	CT	CC	CT	CT	CC	CC	CT	CC	TT	CT	CT	CC	CC	CT	CT	CT	CT	CT	TT	TT	TT	CC	CT	CT	CC	TT	TT	CC	CC	CC	CC	CC	CT	CT	CT	CC	CT	CT	CC	CC	CC	CC	TT	TT
Gm16_6123332	Gm16	6123332	173.08	G	0.239316	GA	AA	GA	GA	AA	AA	GA	GG	GG	GA	GA	AA	AA	GA	GA	GA	GA	GA	GG	GG	GG	AA	GA	GA	AA	GG	GG	AA	AA	GA	AA	AA	GA	GA	GA	AA	GA	GA	AA	AA	AA	AA	GG	GG
Gm16_6123232	Gm16	6123232	173.3	C	0.239316	CT	TT	CT	CT	TT	TT	CT	CC	CC	CT	CT	TT	TT	CT	CT	CT	CT	CT	CC	CC	CC	TT	CT	CT	TT	CC	CC	TT	TT	CT	TT	TT	CT	CT	CT	TT	CT	CT	TT	TT	TT	TT	CC	CC
Gm16_6031244	Gm16	6031244	173.95	G	0.239316	GA	AA	GA	GA	AA	AA	GA	GG	GG	GA	GA	AA	AA	GA	GA	GA	GA	GA	GG	GG	GG	AA	GA	GA	AA	GG	GG	AA	AA	GA	AA	AA	GA	GA	GA	AA	GA	GA	AA	AA	AA	AA	GG	GG
Gm16_6031210	Gm16	6031210	174.17	A	0.239316	AG	GG	AG	AG	GG	GG	AG	AA	AA	AG	AG	GG	GG	AG	AG	AG	AG	AG	AA	AA	AA	GG	AG	AG	GG	AA	AA	GG	GG	AG	GG	GG	AG	AG	AG	GG	AG	AG	GG	GG	GG	GG	AA	AA
Gm16_5859986	Gm16	5859986	174.82	G	0.230769	GA	AA	GA	GA	AA	AA	GA	GG	GG	GA	GA	AA	AA	GA	GA	GA	GA	GA	GG	GG	GG	AA	GA	GA	AA	GG	GG	AA	AA	GA	AA	AA	GA	GA	GA	AA	GA	GA	AA	GA	AA	AA	GG	GG
Gm16_5529746	Gm16	5529746	176.79	T	0.230769	TG	GG	TG	TG	GG	GG	TG	TT	TT	TG	TG	GG	GG	TG	TG	TG	TG	TG	TT	TT	TT	GG	TG	TG	GG	TT	TT	GG	GG	TG	GG	GG	TG	TG	TG	GG	TG	TG	GG	TG	GG	GG	TT	TT
Gm16_5529763	Gm16	5529763	177	G	0.235043	GA	AA	GA	GA	AA	AA	GA	GG	GG	GA	GA	AA	AA	GA	GA	GA	GA	GA	GG	GG	GG	AA	GA	GA	AA	GG	GG	AA	AA	GA	AA	AA	GA	GA	GA	AA	GA	GA	AA	GA	AA	AA	GG	GG
Gm16_4872054	Gm16	4872054	183.05	G	0.25641	GA	GG	GA	GA	GG	GG	GA	AA	AA	GA	GA	GG	GG	GA	GA	GA	GA	GA	AA	AA	AA	GG	AA	GA	GG	AA	AA	GG	GG	GA	GG	GA	GA	GA	GA	GG	GA	AA	GG	GA	GG	GG	AA	AA
Gm16_1236015	Gm16	1236015	223.8	A	0.260684	AA	AA	AG	AG	AA	AA	AG	AA	AG	AG	AG	AG	AA	AA	AG	AG	AG	AG	AG	GG	AG	AG	GG	AG	AA	GG	AG	AG	GG	AG	AG	AG	AG	AG	AG	AA	AG	GG	GG	AG	AG	GG	GG	AG
Gm16_1235999	Gm16	1235999	224.01	C	0.260684	CC	CC	CT	CT	CC	CC	CT	CC	CT	CT	CT	CT	CC	CC	CT	CT	CT	CT	CT	TT	CT	CT	TT	CT	CC	TT	CT	CT	TT	CT	CT	CT	CT	CT	CT	CC	CT	TT	TT	CT	CT	TT	TT	CT
Gm16_1160199	Gm16	1160199	224.88	A	0.25641	AA	AA	AG	AG	AA	AA	AG	AA	AG	AG	AG	AG	AA	AA	AG	AG	AG	AG	AG	GG	AG	AG	GG	AG	AA	GG	AG	AG	GG	AG	AG	AG	AG	AG	AG	AA	AG	GG	GG	AG	AG	GG	GG	AG
Gm16_1160174	Gm16	1160174	225.31	T	0.260684	TT	TT	TC	TC	TT	TT	TC	TT	TC	TC	TC	TC	TT	TT	TC	TC	TC	TC	TC	CC	TC	TC	CC	TC	TT	CC	TC	TC	CC	TC	TC	TC	TC	TC	TC	TT	TC	CC	CC	TC	TC	CC	CC	TC
Gm16_988978	Gm16	988978	226.62	C	0.260684	CC	CC	CT	CT	CC	CC	CT	CC	CT	CT	CT	CT	CC	CC	CT	CT	CT	CT	CT	TT	CT	CT	TT	CT	CC	TT	CT	CC	TT	CT	CT	CT	CT	CT	CT	CC	CT	TT	TT	CT	CT	TT	TT	CT
Gm16_129982	Gm16	129982	239.42	C	0.324786	GG	GG	CG	CG	GG	CG	CG	GG	CG	GG	CG	CC	GG	GG	GG	CG	CG	CG	CG	CC	CG	CG	CC	CG	GG	CC	CG	CG	CC	GG	CG	CG	CG	CG	CG	GG	CG	CC	CC	CG	CC	CC	CC	GG
Gm16_69040	Gm16	69040	240.51	T	0.324786	AA	AA	TA	TA	AA	TA	TA	AA	TT	AA	TA	TT	AA	AA	AA	TA	TA	TA	TA	TT	TA	TA	TT	TA	AA	TT	TA	TA	TT	AA	TA	TA	TA	TA	TA	AA	TA	TT	TT	TA	TT	TT	TT	AA
Gm16_69046	Gm16	69046	241.16	A	0.324786	CC	CC	AC	AC	CC	AC	AC	CC	AA	CC	AC	AA	CC	CC	CC	AC	AC	AC	AC	AA	AC	AC	AA	AC	CC	AA	AC	AC	AA	CC	AC	AC	AC	AC	AC	CC	AC	AA	AA	AC	AA	AA	AA	CC
Gm16_69017	Gm16	69017	243.79	G	0.320513	CC	CC	GC	GC	CC	GC	GC	CC	GG	CC	GC	GG	CC	CC	CC	GC	GC	GC	GC	GG	GC	GC	GG	GC	CC	GG	GG	GC	GG	CC	GC	GC	GC	GC	GC	CC	GC	GG	GG	GC	GG	GG	GG	CC
Gm17_41577845	Gm17	41577845	0	G	0.320513	GA	GG	AA	AA	GA	AA	AA	AA	AA	GA	GG	AA	AA	AA	AA	AA	GA	GG	GG	AA	GA	AA	GG	GA	GA	AA	AA	GA	AA	GA	AA	GA	AA	AA	GA	AA	AA	GA	AA	GA	GA	GA	AA	GG
Gm17_41491575	Gm17	41491575	1.11	C	0.316239	CA	CC	AA	AA	CA	AA	AA	AA	AA	CA	CC	AA	AA	AA	AA	AA	CA	CC	CC	AA	CA	AA	CC	CA	CA	AA	AA	CA	AA	CA	AA	CA	AA	AA	CA	AA	AA	CA	AA	CA	CA	CA	AA	CC
Gm17_39264540	Gm17	39264540	31.94	T	0.299145	AA	TA	AA	TT	TA	AA	TA	TT	TA	TA	TA	TT	AA	TT	TT	TT	TA	AA	AA	TT	TA	TA	AA	TT	TT	TA	TA	TA	TA	TT	TT	TA	TA	TT	TA	TT	TT	TA	TT	TA	TA	TA	TT	AA
Gm17_39110086	Gm17	39110086	33.02	A	0.299145	AA	AT	AA	TT	AT	AA	AT	TT	AT	AT	AT	TT	AA	TT	TT	TT	AT	AA	AT	TT	AT	AT	AA	TT	TT	AT	AT	AT	AT	TT	TT	AT	AT	TT	AT	TT	TT	AT	TT	AT	AT	AT	TT	AA
Gm17_39052472	Gm17	39052472	33.45	T	0.299145	TT	TC	TT	CC	TC	TT	TC	CC	TC	TC	TC	CC	TT	CC	CC	CC	TC	TT	TC	CC	TC	TC	TT	CC	CC	TC	TC	TC	TC	CC	CC	TC	TC	CC	TC	CC	CC	TC	CC	TC	TC	TC	CC	TT
Gm17_38969012	Gm17	38969012	34.76	G	0.294872	GG	GA	GG	AA	GA	GG	GA	AA	GA	GA	GA	AA	GG	AA	AA	AA	GA	GG	GA	AA	GA	GA	GG	AA	AA	GA	GA	GG	GA	AA	AA	GA	GA	AA	GA	AA	AA	GA	AA	GA	GA	GA	AA	GG
Gm17_38769776	Gm17	38769776	38.06	A	0.286325	GG	AG	GG	AA	AG	GG	AG	AA	AG	AG	AG	AA	GG	AG	AA	AG	AG	GG	AG	AA	AG	AG	GG	AA	AA	AG	GG	GG	AG	AA	AA	AG	AG	AA	AG	AA	AA	AG	AA	AG	AG	AG	AA	GG
Gm17_38620404	Gm17	38620404	40.03	A	0.286325	AA	AG	AA	GG	AG	AA	AG	GG	AG	AG	AG	GG	AA	AG	GG	AG	AG	AG	AG	GG	AG	AG	AA	GG	GG	AG	AA	AA	AG	GG	GG	AG	AG	GG	AG	GG	GG	AG	GG	AG	AG	AG	GG	AA
Gm17_38541374	Gm17	38541374	41.12	C	0.282051	CC	CT	CC	TT	CT	CC	CT	TT	CT	CT	CT	TT	CC	CT	TT	CT	CT	CT	CT	TT	CT	CT	CC	TT	TT	CT	CC	CC	CT	TT	TT	CT	CT	TT	CT	TT	TT	CT	TT	CT	CT	CT	TT	CC
Gm17_38369765	Gm17	38369765	41.99	C	0.282051	CC	CT	CC	TT	CT	CC	CT	TT	CT	CT	CT	TT	CC	CT	TT	CT	CT	CT	CT	TT	CT	CC	CC	TT	TT	CT	CC	CC	CT	TT	TT	CT	CT	TT	CT	TT	TT	CT	TT	CT	CT	CT	TT	CC
Gm17_38248185	Gm17	38248185	43.08	T	0.282051	TT	TC	TT	CC	TC	TT	TC	CC	TC	TC	TC	CC	TT	TC	CC	TC	TC	TC	TC	CC	TC	TT	TT	CC	CC	TC	TT	TT	TC	CC	CC	TC	TT	CC	TC	CC	CC	TC	CC	TC	TC	TC	CC	TT
Gm17_38228839	Gm17	38228839	43.29	A	0.282051	GG	AG	GG	AA	AG	GG	AG	AA	AG	AG	AG	AA	GG	AG	AA	AG	AG	AG	AG	AA	AG	GG	GG	AA	AA	AG	GG	GG	AG	AA	AA	AG	GG	AA	AG	AA	AA	AG	AA	AG	AG	AG	AA	GG
Gm17_38046907	Gm17	38046907	44.16	T	0.277778	CC	TC	CC	TT	TC	CC	TC	TT	TC	TC	TC	TT	CC	TC	TT	TC	TC	TC	TC	TT	TC	CC	CC	TT	TT	TC	CC	CC	TC	TT	TT	CC	CC	TT	TC	TT	TT	TC	TT	TC	TC	TC	TT	CC
Gm17_37911000	Gm17	37911000	44.6	G	0.277778	AA	GA	AA	GG	GA	AA	GA	GG	GA	GA	GA	GG	AA	GA	GG	GA	GA	GA	GA	GG	GA	AA	AA	GG	GG	GA	AA	AA	GA	GG	GG	AA	AA	GG	GA	GG	GG	GA	GG	GA	GA	GA	GG	AA
Gm17_37879049	Gm17	37879049	44.81	T	0.273504	CC	TC	CC	TT	TC	CC	TC	TT	TC	TC	TC	TT	CC	TC	TT	TC	TC	TC	TC	TT	TC	CC	CC	TT	TT	TC	CC	CC	TC	TT	TT	CC	CC	TT	TC	TT	TT	TC	TT	TC	TC	TC	TT	CC
Gm17_37610885	Gm17	37610885	49.47	A	0.282051	AA	AG	AA	GG	AG	AA	AA	GG	AG	GG	AG	GG	AA	AG	GG	AA	AG	AG	AG	GG	AG	AA	AA	GG	GG	AG	AA	AA	AG	GG	GG	AA	AA	GG	AG	GG	GG	AG	GG	AG	AG	GG	GG	AA
Gm17_37499280	Gm17	37499280	52.32	C	0.303419	CC	CG	CC	GG	CG	CC	CC	GG	CG	GG	CG	GG	CC	CC	GG	CC	CG	GG	CG	GG	CG	CC	CC	GG	GG	CG	CC	CC	CG	GG	GG	CC	CC	GG	CG	GG	GG	CG	GG	CC	CG	GG	GG	CC
Gm17_37499328	Gm17	37499328	53.63	T	0.286325	TT	TG	TT	GG	TG	TT	TT	GG	TG	GG	TG	GG	TT	TT	GG	TT	TG	GG	TG	GG	TG	TT	TT	GG	GG	TG	TT	TT	TG	GG	GG	TT	TT	GG	TG	GG	GG	TG	GG	TG	TG	GG	GG	TT
Gm17_36551992	Gm17	36551992	55.59	T	0.286325	TT	TC	TT	CC	TC	TT	TT	CC	TC	CC	TC	CC	TT	TC	CC	TT	TC	CC	TC	CC	TC	TT	TT	CC	CC	TC	TT	TT	TC	CC	CC	TT	TT	CC	TC	CC	CC	TC	CC	TC	TC	CC	CC	TT
Gm17_36552002	Gm17	36552002	56.03	A	0.282051	AA	AC	AA	CC	AC	AA	AA	CC	AC	CC	AC	CC	AA	AC	CC	AA	AC	CC	AC	CC	AC	AA	AA	CC	CC	AC	AA	AA	AC	CC	CC	AA	AA	CC	AC	CC	CC	AC	CC	AC	AC	CC	CC	AA
Gm17_37215180	Gm17	37215180	56.24	A	0.282051	AA	AC	AA	CC	AC	AA	AA	CC	AC	CC	AC	CC	AA	AC	CC	AA	AC	CC	AC	CC	AC	AA	AA	CC	CC	AC	AA	AA	AC	CC	CC	AA	AA	CC	AC	CC	CC	AC	CC	AC	AC	CC	CC	AA
Gm17_37452935	Gm17	37452935	56.46	T	0.277778	TT	TC	TT	CC	TC	TT	TT	CC	TC	CC	TC	CC	TT	TC	CC	TT	TC	CC	TC	CC	TC	TT	TT	CC	CC	TC	TT	TT	TC	CC	CC	TT	TT	CC	TC	CC	CC	TC	CC	TC	TC	CC	CC	TT
Gm17_37117241	Gm17	37117241	57.55	C	0.286325	CC	CT	CC	TT	CT	CC	CC	TT	CT	TT	CT	TT	CC	CT	TT	CC	CT	TT	CT	TT	CT	CC	CC	TT	TT	CT	CC	CC	CT	TT	TT	CC	CC	TT	CT	TT	TT	CT	TT	CT	CT	TT	TT	CC
Gm17_37117239	Gm17	37117239	57.76	A	0.282051	AA	AG	AA	GG	AG	AA	AA	GG	AG	GG	AG	GG	AA	AG	GG	AA	AG	GG	AG	GG	AG	AA	AA	GG	GG	AG	AA	AA	AG	GG	GG	AA	AA	GG	AG	GG	GG	AG	GG	AG	AG	GG	GG	AA
Gm17_37117290	Gm17	37117290	58.42	C	0.282051	CC	CT	CC	TT	CT	CC	CC	TT	CT	TT	CT	TT	CC	CT	TT	CC	CT	TT	CT	TT	CT	CC	CC	TT	TT	CT	CC	CC	CT	TT	TT	CC	CC	TT	CT	TT	TT	CT	TT	CT	CT	TT	TT	CC
Gm17_36232380	Gm17	36232380	60.84	G	0.311966	GG	GA	GG	AA	GA	GG	GG	AA	GG	AA	GG	AA	GG	GA	AA	GG	GA	AA	GA	AA	GA	GG	GG	AA	AA	GA	GG	GG	GA	AA	AA	GG	GG	AA	GA	AA	AA	GA	AA	GA	GA	AA	AA	GG
Gm17_36313792	Gm17	36313792	62.83	T	0.282051	TT	TA	TT	AA	TA	TT	TT	AA	TA	AA	TA	AA	TT	TA	AA	TT	TA	AA	TA	AA	TA	TT	TT	AA	AA	TA	TT	TT	TA	AA	AA	TT	TT	AA	TA	AA	AA	TA	AA	TA	TA	AA	AA	TT
Gm17_36188115	Gm17	36188115	63.04	A	0.282051	AA	AC	AA	CC	AC	AA	AA	CC	AC	CC	AC	CC	AA	AC	CC	AA	AC	CC	AC	CC	AC	AA	AA	CC	CC	AC	AA	AA	AC	CC	CC	AA	AA	CC	AC	CC	CC	AC	CC	AC	AC	CC	CC	AA
Gm17_35528415	Gm17	35528415	63.26	T	0.282051	TT	TG	TT	GG	TG	TT	TT	GG	TG	GG	TG	GG	TT	TG	GG	TT	TG	GG	TG	GG	TG	TT	TT	GG	GG	TG	TT	TT	TG	GG	GG	TT	TT	GG	TG	GG	GG	TT	GG	TG	TG	GG	GG	TT
Gm17_35405088	Gm17	35405088	63.48	T	0.282051	TT	TC	TT	CC	TC	TT	TT	CC	TC	CC	TC	CC	TT	TC	CC	TT	TC	CC	TC	CC	TC	TT	TT	CC	CC	TC	TT	TT	TC	CC	CC	TT	TT	CC	TC	CC	CC	TT	CC	TC	TC	CC	CC	TT
Gm17_35021075	Gm17	35021075	64.13	G	0.282051	GG	GA	GG	AA	GA	GG	GG	AA	GA	AA	GA	AA	GG	GA	AA	GG	GA	AA	GA	AA	GA	GG	GG	AA	AA	GA	GG	GG	GA	AA	AA	GG	GG	AA	GA	AA	AA	GG	AA	GA	GA	AA	AA	GG
Gm17_34869345	Gm17	34869345	64.35	T	0.282051	TT	TC	TT	CC	TC	TT	TT	CC	TC	CC	TC	CC	TT	TC	CC	TT	TC	CC	TC	CC	TC	TT	TT	CC	CC	TC	TT	TT	TC	CC	CC	TT	TT	CC	TC	CC	CC	TT	CC	TC	TC	CC	CC	TT
Gm17_34936946	Gm17	34936946	64.78	G	0.286325	GG	GC	GG	CC	GC	GG	GG	CC	GC	CC	GC	CC	GG	GC	CC	GG	GC	CC	GC	CC	GC	GG	GG	CC	CC	GC	GG	GG	GC	CC	CC	GG	GG	CC	GC	CC	CC	GG	CC	GC	GC	CC	CC	GG
Gm17_34273028	Gm17	34273028	65	T	0.282051	TT	TC	TT	CC	TC	TT	TT	CC	TC	CC	TC	CC	TT	TC	CC	TT	TC	CC	TC	CC	TC	TT	TT	CC	CC	TC	TT	TT	TC	CC	CC	TT	TT	CC	TC	CC	CC	TT	CC	TC	TC	CC	CC	TT
Gm17_34178050	Gm17	34178050	65.21	T	0.277778	TT	TC	TT	CC	TC	TT	TT	CC	TC	CC	TC	CC	TT	TC	CC	TT	TC	CC	TC	CC	TC	TT	TT	CC	CC	TC	TT	TT	TC	CC	CC	TT	TT	CC	TC	CC	CC	TT	CC	TC	TC	CC	CC	TT
Gm17_33494104	Gm17	33494104	66.96	T	0.299145	TT	TC	TT	CC	TC	TT	TT	CC	TC	CC	TC	CC	TT	TC	CC	TT	TC	CC	TC	CC	TC	TT	TT	CC	CC	TC	TT	TT	TC	CC	CC	TT	TT	CC	TC	CC	CC	TT	CC	TC	TC	CC	CC	TT
Gm17_33494115	Gm17	33494115	67.61	C	0.307692	CC	CT	CC	TT	CT	CC	CC	TT	CT	TT	CT	TT	CC	CC	TT	CC	CT	TT	CT	TT	CT	CC	CC	TT	TT	CT	CC	CC	CT	TT	TT	CC	CC	TT	CT	TT	TT	CC	TT	CT	CT	TT	TT	CC
Gm17_34753269	Gm17	34753269	69.57	G	0.282051	GG	GC	GG	CC	GC	GG	GG	CC	GC	CC	GC	CC	GG	GC	CC	GG	GC	CC	GC	CC	GC	GG	GG	CC	CC	GC	GG	GG	GC	CC	CC	GG	GG	CC	GC	CC	CC	GG	CC	GC	GC	CC	CC	GG
Gm17_34273042	Gm17	34273042	70.01	G	0.277778	GG	GC	GG	CC	GC	GG	GG	CC	GC	CC	GC	CC	GG	GC	CC	GG	GC	CC	GC	CC	GC	GG	GG	CC	CC	GC	GG	GG	GC	CC	CC	GG	GG	CC	GC	CC	CC	GG	CC	GC	GC	CC	CC	GG
Gm17_33575837	Gm17	33575837	70.44	A	0.273504	AA	AG	AA	GG	AG	AA	AA	GG	AG	GG	AG	GG	AA	AG	GG	AA	AG	GG	AG	GG	AG	AA	AA	GG	GG	AG	AA	AA	AG	GG	GG	AA	AA	GG	AG	GG	GG	AA	GG	AG	AG	GG	GG	AA
Gm17_33216178	Gm17	33216178	70.87	G	0.277778	GG	GA	GG	AA	GA	GG	GG	AA	GA	AA	GA	AA	GG	GA	AA	GG	GA	AA	GA	AA	GA	GG	GG	AA	AA	GA	GG	GG	GA	AA	AA	GG	GG	AA	AA	AA	AA	GG	AA	GA	GA	AA	AA	GG
Gm17_25474505	Gm17	25474505	72.62	T	0.299145	TT	TC	TT	CC	TC	TT	TT	CC	TC	CC	TC	CC	TT	TC	CC	TT	TC	CC	TC	CC	TC	TT	TT	CC	CC	TC	TT	TT	TC	CC	CC	TT	TT	CC	CC	CC	CC	TT	CC	TC	TC	CC	CC	TT
Gm17_25474495	Gm17	25474495	73.92	A	0.282051	AA	AG	AA	GG	AG	AA	AA	GG	AG	GG	AG	GG	AA	AG	GG	AA	AG	GG	AG	GG	AG	AA	AA	GG	GG	AG	AA	AA	AG	GG	GG	AA	AA	GG	GG	GG	GG	AA	GG	AG	AG	GG	GG	AA
Gm17_24398934	Gm17	24398934	74.79	C	0.282051	CC	CT	CC	TT	CT	CC	CC	TT	CT	TT	CT	TT	CC	CT	TT	CC	CT	TT	CT	TT	CT	CC	CC	TT	TT	CT	CC	CC	CT	TT	TT	CC	CC	TT	TT	TT	TT	CC	TT	CT	CT	TT	TT	CC
Gm17_26218873	Gm17	26218873	75.01	T	0.286325	TT	TC	TT	CC	TC	TT	TT	CC	TC	CC	TC	CC	TT	TC	CC	TT	TC	CC	TC	CC	TC	TT	TT	CC	CC	TC	TT	TT	TC	CC	CC	TT	TT	CC	CC	CC	CC	TT	CC	TC	TC	CC	CC	TT
Gm17_25411025	Gm17	25411025	75.66	T	0.286325	TT	TA	TT	AA	AA	TT	TT	AA	TA	AA	TA	AA	TT	TA	AA	TT	TA	AA	TA	AA	TA	TT	TT	AA	AA	TA	TT	TT	TA	AA	AA	TT	TT	AA	AA	AA	AA	TT	AA	TA	TA	AA	AA	TT
Gm17_26548109	Gm17	26548109	75.87	A	0.282051	AA	AG	AA	GG	AG	AA	AA	GG	AG	GG	AG	GG	AA	AG	GG	AA	AG	GG	AG	GG	AG	AA	AA	GG	GG	AG	AA	AA	AG	GG	GG	AA	AA	GG	GG	GG	GG	AA	GG	AG	AG	GG	GG	AA
Gm17_30423736	Gm17	30423736	76.74	G	0.282051	GG	GA	GG	AA	GA	GG	GG	AA	GA	AA	GA	AA	GG	GA	AA	GG	GA	AA	GA	AA	GA	GG	GG	AA	AA	GA	GG	GG	GA	AA	AA	GG	GG	AA	AA	AA	AA	GG	AA	GA	GA	AA	AA	GG
Gm17_30423755	Gm17	30423755	77.39	T	0.286325	TT	TA	TT	AA	TA	TT	TT	AA	TA	AA	TA	AA	TT	TA	AA	TT	TA	AA	TA	AA	TA	TT	TT	AA	AA	TA	TT	TT	TA	AA	AA	TT	TT	AA	AA	AA	AA	TT	AA	TA	TA	AA	AA	TT
Gm17_30423773	Gm17	30423773	78.92	A	0.316239	AA	AG	AA	GG	AA	AA	AA	GG	AG	GG	AG	GG	AA	AG	GG	AA	AA	GG	AG	GG	AG	AA	AA	GG	GG	AG	AA	AA	AG	GG	GG	AA	AA	GG	GG	GG	GG	AA	GG	AG	AG	GG	GG	AA
Gm17_28203977	Gm17	28203977	82.06	T	0.286325	TT	TC	TT	CC	TC	TT	TT	CC	TC	CC	TC	CC	TT	TT	CC	TT	TT	CC	TC	CC	TC	TT	TT	CC	CC	TC	TT	TT	TC	CC	CC	TT	TT	CC	CC	CC	CC	TT	CC	TC	TC	CC	CC	TT
Gm17_32171034	Gm17	32171034	83.17	T	0.277778	TT	TC	TT	CC	TC	TT	TT	CC	TC	CC	TC	CC	TT	TT	CC	TT	TC	CC	TC	CC	TC	TT	TT	CC	CC	TC	TT	TT	TC	CC	CC	TT	TT	CC	CC	CC	CC	TT	CC	TC	TC	CC	CC	TT
Gm17_29242473	Gm17	29242473	84.04	A	0.273504	AA	AG	AA	GG	AG	AA	AA	GG	AG	GG	AG	GG	AA	AG	GG	AA	AG	AA	AG	GG	AG	AA	AA	GG	GG	AG	AA	AA	AG	GG	GG	AA	AA	GG	GG	GG	GG	AA	GG	AG	AG	GG	GG	AA
Gm17_27696005	Gm17	27696005	84.48	A	0.282051	AA	AG	AA	GG	AG	AA	AA	GG	AG	GG	AG	GG	AA	AG	GG	AA	AG	GG	AG	GG	AG	AA	AA	GG	GG	AG	AA	AA	AG	GG	GG	AA	AA	GG	GG	GG	GG	AA	GG	AG	AG	GG	GG	AA
Gm17_27493166	Gm17	27493166	85.35	A	0.282051	AA	AG	AA	GG	AG	AA	AA	GG	AG	GG	AG	GG	AA	AG	GG	AA	AG	GG	AG	GG	AG	AA	AA	GG	GG	AG	AA	AA	AA	GG	GG	AA	AA	GG	GG	GG	GG	AA	GG	AG	AG	GG	GG	AA
Gm17_27493162	Gm17	27493162	85.56	A	0.286325	AA	AG	AA	GG	AG	AA	AA	GG	AG	GG	AG	GG	AA	AG	GG	AA	AG	GG	AG	GG	AA	AA	AA	GG	GG	AG	AA	AA	AA	GG	GG	AA	AA	GG	GG	GG	GG	AA	GG	AG	AG	GG	GG	AA
Gm17_32129181	Gm17	32129181	86.87	T	0.277778	TT	TC	TT	CC	TC	TT	TT	CC	TC	CC	TC	CC	TT	TC	CC	TT	TC	CC	TC	CC	TC	TT	TT	CC	CC	TC	TT	TT	TC	CC	CC	TT	TT	CC	CC	CC	CC	TT	CC	TC	TC	CC	CC	TT
Gm17_27197319	Gm17	27197319	87.3	C	0.282051	CC	CT	CC	TT	CT	CC	CC	TT	CT	TT	CT	TT	CC	CT	TT	CC	CT	TT	CT	TT	CT	CC	CC	TT	TT	CT	CC	CC	CT	TT	TT	CC	CC	TT	TT	TT	TT	CC	TT	CT	CT	TT	TT	CC
Gm17_25213443	Gm17	25213443	87.74	C	0.282051	CC	CT	CC	TT	CT	CC	CC	TT	CT	TT	CT	TT	CC	CT	TT	CC	CT	TT	CT	TT	CT	CC	CC	TT	TT	CT	CC	CC	CT	TT	TT	CC	CC	TT	TT	TT	TT	CC	TT	CT	CT	TT	TT	CC
Gm17_24242564	Gm17	24242564	88.61	A	0.290598	AA	AC	AA	CC	AC	AA	AA	CC	AC	CC	AC	CC	AA	AC	CC	AA	AC	CC	AC	CC	AC	AA	AA	CC	CC	AC	AA	AA	AC	CC	CC	AA	AA	CC	CC	CC	CC	AA	CC	AC	AC	CC	CC	AA
Gm17_24508718	Gm17	24508718	89.26	G	0.282051	GG	GC	GG	CC	GC	GG	GG	CC	GC	CC	GC	CC	GG	GC	CC	GG	GC	CC	GC	CC	GC	GG	GG	CC	CC	GC	GG	GG	GC	CC	CC	GG	GG	CC	CC	CC	CC	GG	CC	GC	GC	CC	CC	GG
Gm17_23545427	Gm17	23545427	89.69	A	0.282051	AA	AG	AA	GG	AG	AA	AA	GG	AG	GG	AG	GG	AA	AG	GG	AA	AG	GG	AG	GG	AG	AA	AA	GG	GG	AG	AA	AA	AG	GG	GG	AA	AA	GG	GG	GG	GG	AA	GG	AG	AG	GG	GG	AA
Gm17_20980316	Gm17	20980316	90.34	G	0.277778	GG	GA	GG	AA	GA	GG	GG	AA	GA	AA	GA	AA	GG	GA	AA	GG	GA	AA	GA	AA	GA	GG	GG	AA	AA	GA	GG	GG	GA	AA	AA	GG	GG	AA	AA	AA	AA	GG	AA	GA	GA	AA	AA	GG
Gm17_19115906	Gm17	19115906	90.99	C	0.277778	CC	CT	CC	TT	CT	CC	CC	TT	CT	TT	CT	TT	CC	CT	TT	CC	CT	TT	CT	TT	CT	CC	CC	TT	TT	CT	CC	CC	CT	TT	TT	CC	CC	TT	TT	TT	TT	CC	TT	CT	CT	TT	TT	CC
Gm17_22056059	Gm17	22056059	91.43	C	0.282051	CC	CG	CC	GG	CG	CC	CC	GG	CG	GG	CG	GG	CC	CG	GG	CC	CG	GG	CG	GG	CC	CC	CC	GG	GG	CG	CC	CC	CG	GG	GG	CC	CC	GG	GG	GG	GG	CC	GG	CG	CG	GG	GG	CC
Gm17_22056047	Gm17	22056047	92.08	T	0.286325	TT	TC	TT	CC	TC	TT	TT	CC	TC	CC	TC	CC	TT	TC	CC	TT	TT	CC	TC	CC	TT	TT	TT	CC	CC	TC	TT	TT	TC	CC	CC	TT	TT	CC	CC	CC	CC	TT	CC	TC	TC	CC	CC	TT
Gm17_22056089	Gm17	22056089	93.39	C	0.303419	CC	CT	CC	TT	CT	CC	CC	TT	CT	TT	CT	TT	CC	CT	TT	CC	CC	TT	CT	TT	CC	CC	CC	TT	TT	CT	CC	CC	CT	TT	TT	CC	CC	TT	TT	TT	TT	CC	TT	CT	CT	TT	TT	CC
Gm17_19043525	Gm17	19043525	94.92	C	0.277778	CC	CT	CC	TT	CT	CC	CC	TT	CT	TT	CT	TT	CC	CT	TT	CC	CT	TT	CT	TT	CT	CC	CC	TT	TT	CT	CC	CC	CT	TT	TT	CC	CC	TT	TT	TT	TT	CC	TT	CT	CT	TT	TT	CC
Gm17_23237485	Gm17	23237485	95.57	A	0.282051	AA	AG	AA	GG	AG	AA	AA	GG	AG	GG	AG	GG	AA	AG	GG	AA	AG	GG	AG	GG	AG	AA	AA	GG	GG	AG	AA	AA	AG	GG	GG	AA	AA	GG	GG	GG	GG	AA	GG	AG	AG	GG	GG	AA
Gm17_18615331	Gm17	18615331	96.66	G	0.277778	GG	GA	GG	AA	GA	GG	GG	AA	GA	AA	GA	AA	GG	GA	AA	GA	GA	AA	GA	AA	GA	GG	GG	AA	AA	GA	GG	GG	GA	AA	AA	GG	GG	AA	AA	AA	AA	GG	AA	GA	GA	AA	AA	GG
Gm17_18615307	Gm17	18615307	96.88	G	0.277778	GG	GC	GG	CC	GC	GG	GG	CC	GC	CC	GC	CC	GG	GC	CC	GC	GC	CC	GC	CC	GC	GG	GG	CC	CC	GC	GG	GG	GC	CC	CC	GG	GG	CC	CC	CC	CC	GG	CC	GC	GC	CC	CC	GG
Gm17_18812082	Gm17	18812082	97.1	T	0.277778	TT	TA	TT	AA	TA	TT	TT	AA	TA	AA	TA	AA	TT	TA	AA	TA	TA	AA	TA	AA	TA	TT	TT	AA	AA	TA	TT	TT	TA	AA	AA	TT	TT	AA	AA	AA	AA	TT	AA	TA	TA	AA	AA	TT
Gm17_19242535	Gm17	19242535	97.31	G	0.277778	GG	GA	GG	AA	GA	GG	GG	AA	GA	AA	GA	AA	GG	GA	AA	GG	GA	AA	GA	AA	GA	GG	GG	AA	AA	GA	GG	GG	GA	AA	AA	GG	GG	AA	AA	AA	AA	GG	AA	GA	GA	AA	AA	GG
Gm17_20483950	Gm17	20483950	97.53	A	0.277778	AA	AG	AA	GG	AG	AA	AA	GG	AG	GG	AG	GG	AA	AG	GG	AA	GG	GG	AG	GG	AG	AA	AA	GG	GG	AG	AA	AA	AG	GG	GG	AA	AA	GG	GG	GG	GG	AA	GG	AG	AG	GG	GG	AA
Gm17_20483990	Gm17	20483990	97.75	T	0.277778	TT	TG	TT	GG	TG	TT	TT	GG	TG	GG	TG	GG	TT	TG	GG	TT	GG	GG	TG	GG	TG	TT	TT	GG	GG	TG	TT	TT	TG	GG	GG	TT	TT	GG	GG	GG	GG	TT	GG	TG	TG	GG	GG	TT
Gm17_20483998	Gm17	20483998	97.97	G	0.273504	GG	GA	GG	AA	GA	GG	GG	AA	GA	AA	GA	AA	GG	GA	AA	GG	GA	AA	GA	AA	GA	GG	GG	AA	AA	GA	GG	GG	GA	AA	AA	GG	GG	AA	AA	AA	AA	GG	AA	GA	GA	AA	AA	GG
Gm17_18710383	Gm17	18710383	98.18	C	0.277778	CC	CT	CC	TT	CT	CC	CC	TT	CT	TT	CT	TT	CC	CT	TT	CT	CT	TT	CT	TT	CT	CC	CC	TT	TT	CT	CC	CC	CT	TT	TT	CC	CC	TT	TT	TT	TT	CC	TT	CT	CT	TT	TT	CC
Gm17_18465587	Gm17	18465587	98.62	T	0.277778	TT	TC	TT	CC	TC	TT	TT	CC	TC	CC	TC	CC	TT	TC	CC	TC	TC	CC	TC	CC	TC	TT	TT	CC	CC	TC	TT	TT	TC	CC	CC	TC	TT	CC	CC	CC	CC	TT	CC	TC	TC	CC	CC	TT
Gm17_18465513	Gm17	18465513	99.05	G	0.277778	GG	GA	GG	AA	GA	GG	GG	AA	GA	AA	GA	AA	GG	GA	AA	GA	GA	AA	GA	AA	GA	GG	GG	AA	AA	GA	GG	GG	GA	AA	AA	GA	GG	AA	AA	AA	AA	GG	AA	GA	GA	AA	AA	GG
Gm17_18465502	Gm17	18465502	99.48	T	0.282051	TT	TC	TT	CC	TC	TT	TT	CC	TC	CC	TC	CC	TT	TC	CC	TC	TT	CC	TC	CC	TC	TT	TT	CC	CC	TC	TT	TT	TC	CC	CC	TC	TT	CC	CC	CC	CC	TT	CC	TC	TC	CC	CC	TT
Gm17_18465549	Gm17	18465549	100.13	A	0.277778	AA	AG	AA	GG	AG	AA	AA	GG	AG	GG	AG	GG	AA	AG	GG	AG	AG	GG	AG	GG	AG	AA	AA	GG	GG	AG	AA	AA	AG	GG	GG	AG	AA	GG	GG	GG	GG	AA	GG	AG	AG	GG	GG	AA
Gm17_18330354	Gm17	18330354	100.78	T	0.277778	TT	TC	TT	CC	TC	TT	TT	CC	TT	CC	TC	CC	TT	TC	CC	TC	TC	CC	TC	CC	TC	TT	TT	CC	CC	TC	TT	TT	TC	CC	CC	TC	TT	CC	CC	CC	CC	TT	CC	TC	TC	CC	CC	TT
Gm17_18330312	Gm17	18330312	101.21	C	0.277778	CC	CT	CC	TT	CT	CC	CC	TT	CT	TT	CT	TT	CC	CT	TT	CT	CT	TT	CT	TT	CT	CC	CC	TT	TT	CT	CC	CC	CT	TT	TT	CT	CC	TT	TT	TT	TT	CC	TT	CT	CT	TT	TT	CC
Gm17_18232114	Gm17	18232114	101.87	A	0.282051	AA	AG	AA	GG	AG	AA	AA	GG	AG	GG	AG	GG	AA	AG	GG	AG	AG	GG	AG	GG	AG	AA	AA	GG	GG	AG	AA	AA	AG	GG	GG	AG	AA	GG	GG	GG	GG	AA	GG	AG	AG	GG	GG	AA
Gm17_18180884	Gm17	18180884	102.52	T	0.277778	TT	TT	TT	AA	TA	TT	TT	AA	TA	AA	TA	AA	TT	TA	AA	TA	TA	AA	TA	AA	TA	TT	TT	AA	AA	TA	TT	TT	TA	AA	AA	TA	TT	AA	AA	AA	AA	TT	AA	TA	TA	AA	AA	TT
Gm17_17178127	Gm17	17178127	103.39	A	0.282051	AA	AG	AA	GG	AG	AA	AA	GG	AG	GG	AG	GG	AA	AG	GG	AG	AG	GG	AG	GG	AG	AA	AA	GG	GG	AG	AA	AA	AG	GG	GG	AG	AA	GG	GG	GG	GG	AA	GG	AG	AG	GG	GG	AA
Gm17_17248978	Gm17	17248978	104.04	G	0.269231	GG	GA	GG	AA	GA	GG	GG	AA	GA	AA	GA	AA	GG	GA	AA	GA	GA	AA	GA	AA	GA	GG	GG	AA	AA	GA	GG	GG	GA	GA	AA	GA	GG	AA	AA	AA	AA	GG	AA	GA	GA	AA	AA	GG
Gm17_17727566	Gm17	17727566	104.47	T	0.273504	TT	TA	TT	AA	TA	TT	TT	AA	TA	AA	TA	AA	TT	TA	AA	TA	TA	AA	TA	AA	TA	TT	TT	AA	AA	TA	TT	TT	TA	AA	AA	TA	TT	AA	AA	AA	AA	TT	AA	TA	TA	AA	AA	TT
Gm17_16012016	Gm17	16012016	107.55	G	0.320513	GG	GA	GG	AA	GA	GG	GG	AA	GA	AA	GA	AA	GG	GA	AA	GA	GG	AA	GA	AA	GA	GG	GG	AA	AA	GA	GG	GG	GA	AA	AA	GA	GG	AA	AA	AA	AA	GG	AA	GA	GA	AA	AA	GG
Gm17_16975849	Gm17	16975849	111.51	C	0.303419	CC	CT	CC	TT	CT	CC	CC	TT	CT	TT	CT	TT	CC	CT	TT	CT	CT	TT	CC	TT	CT	CC	CC	TT	TT	CT	CC	CC	CT	TT	TT	CT	CC	TT	TT	TT	TT	CC	TT	CT	CT	TT	TT	CC
Gm17_15741902	Gm17	15741902	113.47	A	0.273504	AA	AT	AA	TT	AT	AA	AA	TT	AT	TT	AT	TT	AA	AT	TT	AT	AT	TT	AT	TT	AT	AA	AA	TT	TT	AT	AA	AA	AT	TT	TT	AT	AA	TT	TT	TT	TT	AA	TT	AT	AT	TT	TT	AA
Gm17_16567568	Gm17	16567568	115.66	T	0.307692	TT	TC	TT	CC	TC	TT	TT	CC	TC	CC	TC	CC	TT	TC	CC	TC	TC	CC	TC	CC	TC	TT	TT	CC	CC	TC	TT	TT	TC	CC	CC	TC	TT	CC	CC	CC	CC	TT	CC	TC	TC	CC	CC	TT
Gm17_16567567	Gm17	16567567	115.88	T	0.311966	TT	TC	TT	CC	TC	TT	TT	CC	TC	CC	TC	CC	TT	TC	CC	TC	TC	CC	TC	CC	TC	TT	TT	CC	CC	TC	TT	TT	TC	CC	CC	TC	TT	CC	CC	CC	CC	TT	CC	TC	TC	CC	CC	TT
Gm17_16567544	Gm17	16567544	118.06	T	0.303419	TT	TC	TT	CC	TT	TT	TT	CC	TC	CC	TC	CC	TT	TC	CC	TC	TC	CC	TC	CC	TC	TT	TT	CC	CC	TC	TT	TT	TC	CC	CC	TC	TT	CC	CC	CC	CC	TT	CC	TC	TC	CC	CC	TT
Gm17_15166059	Gm17	15166059	120.47	T	0.282051	AA	TA	AA	TT	TA	AA	AA	TT	TA	TT	TA	TT	AA	TA	TT	TA	TA	TT	TA	TT	TA	AA	AA	TT	TT	TA	AA	AA	TA	TT	TT	TA	AA	TT	TT	TT	TT	AA	TT	TA	TA	TT	TT	AA
Gm17_15221160	Gm17	15221160	120.9	T	0.282051	AA	TA	AA	TT	TA	AA	AA	TT	TA	TT	TA	TT	AA	TA	TT	TA	TA	TT	TA	TT	TA	AA	AA	TT	TT	TA	AA	AA	TA	TT	TT	TA	AA	TT	TT	TT	TT	AA	TT	TA	TA	TT	TT	AA
Gm17_15221126	Gm17	15221126	121.12	A	0.286325	GG	AG	GG	AA	AG	GG	GG	AA	AG	AA	AG	AA	GG	AG	AA	AG	AG	AA	AG	AA	AG	GG	GG	AA	AA	AG	GG	GG	AG	AA	AA	AG	GG	AA	AA	AA	AA	GG	AA	AG	AG	AA	AA	GG
Gm17_15598153	Gm17	15598153	121.76	T	0.282051	CC	TC	CC	TT	TC	CC	CC	TT	TC	TT	TC	TT	CC	TC	TT	TC	TC	TT	TC	TT	TC	CC	CC	TT	TT	TC	CC	CC	TC	TT	TT	TC	CC	TT	TT	TT	TT	CC	TT	TC	TC	TT	TT	CC
Gm17_15453785	Gm17	15453785	122.2	T	0.277778	TT	TG	TT	GG	TG	TT	TT	GG	TG	GG	TG	GG	TT	TG	GG	TG	TG	GG	TG	GG	TG	TT	TT	GG	GG	TG	TT	TT	TG	GG	GG	TG	TT	GG	GG	GG	GG	TT	GG	TG	TG	GG	GG	TT
Gm17_14545935	Gm17	14545935	123.94	T	0.286325	TT	TC	TT	CC	TC	TT	TT	CC	TC	TC	TC	CC	TT	TC	CC	TC	TT	CC	TC	CC	TC	TT	TT	CC	CC	TC	TT	TT	TC	CC	CC	TC	TT	CC	CC	CC	CC	TT	CC	TC	TC	CC	CC	TT
Gm17_14252062	Gm17	14252062	124.16	G	0.294872	GG	GA	GG	AA	GA	GG	GG	AA	GA	GA	GA	AA	GG	GA	AA	GA	GG	AA	GA	AA	GA	GG	GG	AA	AA	GA	GG	GG	GA	AA	AA	GA	GG	AA	AA	AA	AA	GG	AA	GA	GA	AA	AA	GG
Gm17_14279434	Gm17	14279434	124.38	A	0.294872	AA	AG	AA	GG	AG	AA	AA	GG	AG	AG	AG	GG	AA	AG	GG	AG	AA	GG	AG	GG	AG	AA	AA	GG	GG	AG	AA	AA	AG	GG	GG	AG	AA	GG	GG	GG	GG	AA	GG	AG	AG	GG	GG	AA
Gm17_13443483	Gm17	13443483	130.17	C	0.294872	CC	CT	CT	TT	CT	CC	CC	TT	CT	CT	CT	TT	CC	CT	TT	CT	CC	TT	CT	TT	CT	CC	CC	TT	TT	CT	CC	CC	CT	TT	TT	CT	CC	TT	TT	TT	TT	CC	TT	CT	CT	TT	TT	CC
Gm17_13379738	Gm17	13379738	131.25	T	0.294872	TT	TC	TC	CC	TT	TT	TT	CC	TC	TC	TC	CC	TT	TC	CC	TC	TT	CC	TC	CC	TC	TT	TT	CC	CC	TC	TT	TT	TC	CC	CC	TC	TT	CC	CC	CC	CC	TT	CC	TC	TC	CC	CC	TT
Gm17_12352537	Gm17	12352537	134.76	G	0.303419	AA	GA	GA	GG	AA	AA	AA	GG	GA	GA	AA	GG	AA	GA	GG	GA	AA	GG	GA	GG	GA	AA	GA	GG	GG	GG	AA	AA	GA	GG	GG	GA	AA	GG	GG	GG	GG	AA	GG	AA	GA	GG	GG	AA
Gm17_12242499	Gm17	12242499	135.19	C	0.307692	TT	CT	CT	CC	TT	TT	TT	CC	CT	CT	TT	CC	TT	CT	CC	CT	TT	CC	CT	CC	CT	TT	CT	CC	CC	CC	TT	TT	CT	CC	CC	CT	TT	CC	CC	CC	CC	TT	CC	TT	CT	CC	CC	TT
Gm17_11556655	Gm17	11556655	144.8	A	0.32906	AA	AT	AT	TT	AA	AA	AA	TT	AT	AT	AA	TT	AA	AT	TT	AT	AA	TT	AT	AT	AT	AA	AT	TT	TT	AT	AA	AA	AT	AA	TT	AT	AA	AT	TT	TT	TT	AA	AA	AA	AA	TT	TT	AA
Gm17_11556646	Gm17	11556646	145.02	G	0.333333	GG	GT	GT	TT	GG	GG	GG	TT	GT	GT	GG	TT	GG	GT	TT	GT	GG	TT	GT	GT	GT	GG	GT	TT	TT	GT	GG	GG	GT	GG	TT	GT	GG	GG	TT	TT	TT	GG	GG	GG	GG	TT	TT	GG
Gm17_11514492	Gm17	11514492	145.89	A	0.316239	AA	AC	AC	CC	AA	AA	AA	CC	AC	AC	AA	CC	AA	AC	CC	AC	AA	CC	AC	AC	AC	AA	AC	CC	CC	AC	AA	AA	AC	AA	CC	AC	AA	AC	CC	CC	CC	AA	AC	AA	AC	CC	CC	AA
Gm17_9398421	Gm17	9398421	166.37	G	0.307692	AA	AA	GA	GG	AA	GA	AA	GG	AA	GA	AA	GG	AA	GA	GG	GG	GA	GA	GA	GG	AA	GA	GA	GG	GG	GA	GA	GA	GA	GG	GA	GA	GA	GG	GA	GG	GG	GA	GG	AA	GA	GG	GG	AA
Gm17_9106914	Gm17	9106914	167.68	T	0.303419	CC	CC	TC	TT	CC	TC	CC	TT	CC	TC	CC	TT	CC	TC	TT	TT	TC	TC	TC	TT	CC	TC	TC	TT	TT	TC	TC	TC	TC	TT	TC	TC	TC	TT	CC	TT	TT	TC	TT	CC	TC	TT	TT	CC
Gm17_7579488	Gm17	7579488	175.35	A	0.290598	AA	AA	AG	GG	AA	AG	AA	GG	AA	AG	AA	GG	AA	AA	GG	GG	AG	AG	AG	GG	AG	AG	AG	GG	GG	AG	AG	GG	AG	GG	AG	AG	AG	GG	AA	GG	GG	AG	GG	AA	AA	AG	GG	AA
Gm17_7371196	Gm17	7371196	177.09	C	0.286325	CC	CC	CA	AA	CA	CA	CC	AA	CC	CA	CC	AA	CC	CC	AA	AA	CA	CA	CA	AA	CA	CA	CA	AA	AA	CA	CA	AA	CA	AA	CA	CA	CA	AA	CC	AA	AA	CA	AA	CC	CC	CA	AA	CC
Gm17_7190732	Gm17	7190732	179.72	C	0.303419	TT	TT	CT	CC	CT	CT	TT	CC	TT	CT	TT	CC	TT	TT	CC	CC	CT	CT	CT	CC	CC	CC	CT	CC	CC	CT	CT	CC	CT	CC	CT	CT	CT	CC	TT	CC	CC	CT	CC	TT	TT	CT	CC	TT
Gm17_7190705	Gm17	7190705	179.94	C	0.299145	TT	TT	CT	CC	CT	CT	TT	CC	TT	CT	TT	CC	TT	TT	CC	CC	CT	CT	CT	CC	CC	CC	CT	CC	CC	CT	CT	CC	CT	CC	CT	CT	CT	CC	TT	CC	CC	CT	CC	TT	TT	CT	CC	TT
Gm17_3319986	Gm17	3319986	209.06	A	0.277778	AT	AT	AT	TT	AT	AT	AT	AT	AA	AT	AA	AA	AA	AA	TT	AT	AT	AT	TT	AT	TT	AA	AA	TT	AA	AT	AT	AT	AT	AT	AT	TT	AA	AT	AT	AT	AA	AT	TT	AA	AA	AT	TT	AA
Gm17_3319979	Gm17	3319979	209.28	A	0.282051	AC	AC	AC	CC	AC	AC	AC	AC	AA	AC	AA	AA	AA	AA	CC	AC	AC	AC	CC	AC	CC	AA	AA	CC	AA	AC	AC	AC	AC	AC	AC	CC	AA	AC	AC	AC	AA	AC	CC	AA	AA	AC	CC	AA
Gm17_2393064	Gm17	2393064	215.82	G	0.269231	GA	GA	GA	AA	GA	GA	GA	GA	GA	GA	GG	GG	GG	GG	AA	GA	GA	GA	AA	GA	AA	GG	GG	AA	GG	GA	GA	GG	GA	GA	GA	AA	GG	GA	AA	GG	GG	AA	AA	GG	GG	GG	AA	GG
Gm17_2364268	Gm17	2364268	216.25	T	0.277778	TC	TC	TC	CC	TC	TC	TC	TC	TC	TC	TT	TT	TT	TT	CC	TC	TC	TC	CC	TC	CC	TT	TT	CC	TT	TC	TC	TT	TC	TC	TC	CC	TT	TC	CC	TT	TT	CC	CC	TT	TT	TT	CC	TT
Gm17_2364251	Gm17	2364251	216.68	T	0.277778	TC	TC	TC	CC	TC	TC	TC	TC	TC	TC	TT	TT	TT	TT	CC	TC	TC	TC	CC	TC	CC	TT	TT	CC	TT	TC	TC	TT	TT	TC	TC	CC	TT	TC	CC	TT	TT	CC	CC	TT	TT	TT	CC	TT
Gm17_2225134	Gm17	2225134	218.43	C	0.264957	CT	CT	CT	TT	CT	CT	CT	CT	CT	CT	CC	CC	CC	CC	TT	CT	CT	CT	TT	CT	TT	CC	CC	TT	CC	CT	CT	CC	CT	CT	CT	TT	CC	CT	TT	CC	CC	TT	TT	CC	CC	CC	TT	CC
Gm17_2147388	Gm17	2147388	219.3	G	0.260684	GA	GA	GA	AA	GA	GA	GA	GA	GA	GA	GG	GG	GG	GG	AA	GA	GA	GA	AA	GA	AA	GG	GG	AA	GG	GA	GA	GG	GA	GA	GA	AA	GG	GA	AA	GG	GG	AA	AA	GG	GG	GG	AA	GG
Gm18_57236786	Gm18	57236786	0	T	0.260684	TC	TT	TC	TC	CC	TC	TC	TC	TC	CC	TT	TC	TC	TC	TT	TC	CC	CC	TC	TC	TC	TC	TC	TC	TC	TT	TC	CC	TT	TC	TT	TC	TC	TT	CC	CC	TT	TC	TT	CC	CC	TC	TT	TC
Gm18_57166778	Gm18	57166778	0.43	C	0.264957	CA	CC	CA	CA	AA	CA	CA	CA	CA	AA	CC	CA	CA	CA	CC	CA	AA	AA	CA	CA	CA	CA	CA	CA	CA	CC	CA	AA	CC	CA	CC	CA	CA	CC	AA	AA	CC	CA	CC	AA	AA	CA	CC	CA
Gm18_56183519	Gm18	56183519	8.86	G	0.260684	GT	TT	GT	GT	GG	GT	GT	GT	GT	GG	TT	GT	GG	GT	GT	TT	GG	GG	GT	GT	GT	GT	GT	GT	GT	GT	GT	GG	TT	GT	GT	GT	GT	TT	GT	GG	TT	GT	TT	GG	GT	GT	TT	GT
Gm18_56095928	Gm18	56095928	9.07	C	0.260684	CT	TT	CT	CT	CC	CT	CT	CT	CT	CC	TT	CT	CC	CT	CT	TT	CC	CC	CT	CT	CT	CT	CT	CT	CT	CT	CT	CC	TT	CT	CT	CT	CT	TT	CT	CT	TT	CT	TT	CC	CT	CT	TT	CT
Gm18_55570967	Gm18	55570967	10.16	A	0.260684	AC	CC	AC	AC	AA	AC	AC	AC	AC	AC	CC	AC	AA	AC	AC	CC	AA	AA	AC	AC	AC	AC	AC	AC	AC	AC	AC	AA	CC	AC	AC	AC	AC	CC	AC	AC	CC	AC	CC	AA	AC	AC	CC	AC
Gm18_55099705	Gm18	55099705	14.84	T	0.25641	TG	GG	TG	TG	TT	TG	TG	TG	TG	TG	GG	TG	TT	TG	TG	GG	TT	TT	TG	TG	TG	TG	TG	TG	TG	TG	TG	TT	TG	TG	TG	TG	TG	GG	TG	TG	GG	TG	GG	TG	TG	TG	GG	TG
Gm18_55099784	Gm18	55099784	15.06	A	0.260684	AG	GG	AG	AG	AA	AG	AG	AG	AG	AG	GG	AG	AA	AG	AG	GG	AA	AA	AG	AG	AG	AG	AG	AG	AG	AG	AG	AA	AG	AG	AG	AG	AG	GG	AG	AG	GG	AG	GG	AG	AG	AG	GG	AG
Gm18_53849616	Gm18	53849616	27.12	G	0.25641	GT	GG	GT	GT	TT	GT	GT	GT	GT	TT	GT	GT	TT	GT	GT	GT	TT	TT	GT	GT	GT	GG	GT	GT	GT	GT	GT	GT	GT	GT	GT	TT	GT	GG	GG	GG	GG	GT	GG	GT	GT	GT	GT	GT
Gm18_53849685	Gm18	53849685	27.99	C	0.25641	CT	CC	CT	CT	TT	CT	CC	CT	CC	TT	CT	CT	TT	CT	CT	CT	TT	TT	CT	CT	CT	CC	CT	CT	CT	CT	CT	CT	CT	CT	CT	TT	CT	CC	CT	CC	CC	CT	CC	CT	CT	CT	CT	CT
Gm18_53849671	Gm18	53849671	29.08	G	0.252137	GC	GG	GC	GC	CC	GC	GC	GC	GG	CC	GC	GC	CC	GC	GC	GC	CC	CC	GC	GC	GC	GG	GC	GC	GC	GC	GC	GC	GC	GC	GC	CC	GC	GG	GC	GG	GG	GC	GG	GC	GC	GC	GC	GC
Gm18_53739758	Gm18	53739758	31.72	A	0.235043	AT	AA	AT	AA	TT	AT	AT	AT	AT	TT	AT	AT	TT	AT	AT	AT	TT	TT	AT	AT	AT	AA	AT	AT	AT	AT	AT	AT	TT	AT	AT	TT	AT	AA	AT	AA	AA	AT	AA	AA	AT	AT	AT	AT
Gm18_53622099	Gm18	53622099	32.37	C	0.24359	CT	CC	CT	CC	CT	CT	CT	CT	CT	TT	CT	CT	TT	CT	CT	CT	TT	TT	CT	CT	CT	CC	CT	CT	CT	CT	CT	CT	TT	CT	CT	TT	CT	CC	CT	CC	CC	CT	CC	CC	CT	CT	CT	CT
Gm18_53313962	Gm18	53313962	37.51	C	0.316239	CT	CC	CC	CC	CT	CT	CC	CT	CT	TT	TT	CT	TT	CC	CT	CT	TT	TT	CT	CT	CT	CC	CT	CT	CT	CT	CT	CT	TT	CT	CT	TT	CT	CC	CT	CC	CC	CC	CC	CC	CT	CT	CT	CT
Gm18_52621856	Gm18	52621856	46.21	C	0.25641	CC	CT	CT	CC	CT	CT	CT	TT	CT	TT	TT	CT	TT	CT	CT	CT	TT	CT	CT	CT	CT	CC	CT	CT	CT	CT	CT	CT	TT	CT	CT	TT	CT	CC	CT	CC	CC	CT	CT	CC	CT	CT	CT	CT
Gm18_52573168	Gm18	52573168	46.86	T	0.264957	CC	TC	TC	CC	TC	TC	TC	TT	TC	TT	TT	TC	TT	TC	TC	TC	TT	TC	TC	TC	TC	CC	TC	TC	TC	TC	TC	TC	TT	TC	TC	TT	TC	CC	TC	CC	CC	TC	TC	CC	TC	TC	TC	TC
Gm18_52573195	Gm18	52573195	47.07	T	0.260684	CC	TC	TC	CC	TC	TC	TC	TT	TC	TT	TT	TC	TT	TC	TC	TC	TT	TC	TC	TC	TC	CC	TC	TC	TC	TC	TC	TC	TT	TC	TC	TT	TC	CC	TC	CC	CC	TC	TC	CC	TC	TC	TC	TC
Gm18_47669253	Gm18	47669253	76.98	G	0.286325	TT	GT	GT	GT	GT	GT	GT	GG	GT	GG	GG	GT	GG	TT	GT	GG	GT	GG	TT	GG	TT	TT	GG	TT	GT	GT	GT	TT	GG	GT	TT	GG	TT	TT	TT	TT	TT	GT	GT	TT	GT	GT	TT	GG
Gm18_47669268	Gm18	47669268	78.06	G	0.282051	AA	GA	GA	GA	GA	GA	GA	GG	GA	GG	GG	GA	GG	AA	GA	GA	GA	GG	AA	GG	AA	AA	GG	AA	GA	GA	GA	AA	GG	GA	AA	GG	AA	AA	AA	AA	AA	GA	GA	AA	GA	GA	AA	GG
Gm18_47669302	Gm18	47669302	80.02	C	0.277778	TT	CT	CT	CT	CT	CT	CT	CC	CT	CC	CC	CT	CC	TT	CT	CT	CT	CC	TT	CC	TT	TT	CC	TT	CT	CT	CT	TT	CC	CT	TT	CC	TT	TT	TT	TT	TT	CT	CT	TT	CT	CT	TT	CC
Gm18_47832455	Gm18	47832455	82.64	A	0.277778	TT	AT	AT	AT	AT	AT	AT	AA	AT	AA	AA	AT	AA	TT	AT	AT	AT	AT	TT	AA	TT	TT	AA	TT	AT	AT	AT	TT	AA	AT	TT	AA	TT	TT	TT	TT	TT	AT	AT	TT	AT	AT	TT	AA
Gm18_48025711	Gm18	48025711	83.08	A	0.282051	GG	AG	AG	AG	AG	AA	AG	AA	AG	AA	AA	AG	AA	GG	AG	AG	AG	AG	GG	AA	GG	GG	AA	GG	AG	AG	AG	GG	AA	AG	GG	AA	GG	GG	GG	GG	GG	AG	AG	GG	AG	AG	GG	AA
Gm18_47324453	Gm18	47324453	84.38	C	0.269231	TT	CT	CT	CT	CT	CT	CT	CC	CT	CC	CC	CT	CC	TT	CT	CT	CT	CC	TT	CC	TT	TT	CC	TT	CT	CT	CT	TT	CC	CT	TT	CC	TT	TT	TT	TT	TT	CT	CT	TT	CT	CT	TT	CC
Gm18_46965293	Gm18	46965293	84.6	C	0.269231	TT	CT	CT	CT	CT	CT	CT	CC	CT	CC	CC	CT	CC	TT	CT	CT	CT	CT	TT	CC	TT	TT	CC	TT	CT	CT	CT	TT	CC	CT	TT	CC	TT	TT	TT	TT	TT	CT	CT	TT	CT	CT	TT	CC
Gm18_17430200	Gm18	17430200	95.24	T	0.282051	CC	CC	TC	CC	TT	TC	TT	TC	TC	TT	TC	TC	TC	TC	TC	TC	TC	TC	CC	TT	CC	CC	TT	CC	TC	TC	TC	CC	TC	TC	CC	TT	CC	CC	CC	CC	CC	TC	TC	CC	TC	TC	CC	TT
Gm18_17561528	Gm18	17561528	98.1	C	0.277778	TT	TT	CT	TT	CC	CT	CC	CT	CC	CC	CT	CT	CT	CT	CT	CT	CT	CT	TT	CC	TT	TT	CC	TT	CT	CT	CT	TT	CT	CT	TT	CC	TT	TT	TT	TT	TT	CT	CT	TT	CT	CT	TT	CC
Gm18_16722566	Gm18	16722566	100.96	A	0.269231	GG	GG	AG	GG	AA	AG	AA	AG	AG	AA	AG	AG	AG	AG	AG	AG	AG	AG	AG	AA	GG	GG	AA	GG	AG	AG	AG	GG	AG	AG	GG	AA	GG	GG	AG	GG	GG	AG	AG	GG	AG	AG	GG	AA
Gm18_16731633	Gm18	16731633	101.18	A	0.269231	TT	TT	AT	TT	AA	AT	AA	AT	AT	AA	AT	AT	AT	AT	AT	AT	AT	AT	AT	AA	TT	TT	AA	TT	AT	AT	AT	TT	AT	AT	TT	AA	TT	TT	AT	TT	TT	AT	AT	TT	AT	AT	TT	AA
Gm18_16731634	Gm18	16731634	101.39	C	0.269231	TT	TT	CT	TT	CC	CT	CC	CT	CT	CC	CT	CT	CT	CT	CT	CT	CT	CT	CT	CC	TT	TT	CC	TT	CT	CT	CT	TT	CT	CT	TT	CC	TT	TT	CT	TT	TT	CT	CT	TT	CT	CT	TT	CC
Gm18_16731617	Gm18	16731617	101.83	A	0.269231	GG	GG	AG	GG	AA	AG	AA	AG	AG	AA	AG	AG	AG	AG	AG	AG	AG	AG	AG	AA	GG	GG	AA	GG	AG	AG	AG	GG	AG	AG	GG	AA	GG	GG	AG	GG	GG	AG	AG	GG	AG	AG	GG	AA
Gm18_17229478	Gm18	17229478	102.48	G	0.273504	AA	AA	GA	AA	GG	GA	GG	GA	GA	GG	GA	GA	GA	GA	GA	GA	GA	GA	AA	GG	AA	AA	GG	AA	GA	GA	GA	AA	GA	GA	AA	GG	AA	AA	GA	AA	AA	GA	GA	AA	GA	GA	AA	GG
Gm18_17131149	Gm18	17131149	103.57	G	0.273504	AA	AA	GA	AA	GG	GA	GG	GA	GA	GG	GA	GA	GA	GA	GA	GA	GA	GA	AA	GG	AA	AA	GG	AA	GA	GA	GA	AA	GA	GA	AA	GG	AA	AA	GA	AA	AA	GA	GA	AA	GA	GA	AA	GG
Gm18_17325627	Gm18	17325627	104.22	G	0.277778	TT	TT	GT	TT	GG	GT	GG	GT	GT	GG	GT	GT	GT	GT	GT	GT	GT	GT	TT	GG	TT	TT	GG	TT	GT	GT	GT	TT	GT	GT	TT	GG	TT	TT	GT	TT	TT	GT	GT	TT	GT	GT	TT	GG
Gm18_16584070	Gm18	16584070	104.44	A	0.273504	GG	GG	AG	GG	AA	AG	AA	AG	AG	AA	AG	AG	AG	AG	AG	AG	AG	AG	AG	AA	GG	GG	AA	GG	AG	AG	AG	GG	AG	AG	GG	AA	GG	GG	AG	GG	GG	AG	AG	GG	AG	AG	GG	AA
Gm18_16407185	Gm18	16407185	104.65	G	0.273504	AA	AA	GA	AA	GG	GA	GG	GA	GA	GG	GA	GA	GA	GA	GA	GA	GA	GA	GA	GG	AA	AA	GG	AA	GA	GA	GA	AA	GA	GA	AA	GG	AA	AA	GA	AA	AA	GA	GA	AA	GA	GA	AA	GG
Gm18_16352793	Gm18	16352793	104.87	T	0.277778	CC	CC	TC	CC	TT	TC	TT	TC	TC	TT	TC	TC	TC	TC	TC	TC	TC	TC	TC	TT	CC	CC	TT	CC	TC	TC	TC	CC	TC	TC	CC	TT	CC	CC	TC	CC	CC	TC	TC	CC	TC	TC	CC	TT
Gm18_16352794	Gm18	16352794	105.09	G	0.277778	AA	AA	GA	AA	GG	GA	GG	GA	GA	GG	GA	GA	GA	GA	GA	GA	GG	GA	GA	GG	AA	AA	GG	AA	GA	GA	GA	AA	GA	GA	AA	GG	AA	AA	GA	AA	AA	GA	GA	AA	GA	GA	AA	GG
Gm18_9833244	Gm18	9833244	114.74	A	0.316239	AA	AA	AA	AA	GG	AG	GG	AG	AG	AG	AG	AG	AG	AG	AG	GG	GG	AG	AG	GG	AA	AA	AG	AA	GG	AG	AG	AA	AG	AG	AA	GG	AA	AA	AG	AA	AA	AG	AG	AG	AG	AG	AA	GG
Gm18_8367303	Gm18	8367303	116.49	C	0.324786	CC	CC	CC	CC	TT	CT	TT	CT	CT	CT	CT	CT	CT	CT	CT	TT	TT	TT	CT	CT	CC	CC	CT	CC	TT	TT	CT	CC	CT	CT	CC	TT	CC	CC	CT	CC	CC	CT	CT	CT	CT	CT	CC	TT
Gm18_7963919	Gm18	7963919	116.71	C	0.32906	CC	CC	CC	CC	TT	CT	TT	CT	CT	CT	CT	CT	CT	CT	CT	TT	TT	TT	CT	CT	CC	CC	CT	CC	TT	TT	CT	CC	CT	CT	CC	TT	CC	CC	CT	CC	CC	CT	CT	CT	CT	CT	CC	TT
Gm18_7963936	Gm18	7963936	117.14	T	0.32906	TT	TT	TT	TT	GG	TG	GG	TG	TG	TG	TG	TG	TG	TG	TG	GG	GG	GG	TG	TG	TT	TT	TG	TT	GG	GG	TG	TT	TG	TG	TT	GG	TT	TT	TG	TT	TT	TG	TG	TG	TG	TG	TT	GG
Gm18_7857582	Gm18	7857582	117.57	C	0.320513	CC	CC	CC	CC	TT	CT	TT	CT	CT	CT	CT	CT	CT	CT	CT	TT	TT	TT	CT	CT	CC	CC	CT	CC	TT	TT	CT	CC	CT	CT	CC	TT	CC	CC	CT	CC	CT	CT	CT	CT	CT	CT	CC	TT
Gm18_7568769	Gm18	7568769	118.44	A	0.320513	AA	AA	AA	AA	TT	AT	TT	AT	AT	AT	AT	AT	AT	AT	AT	TT	TT	TT	AT	AT	AA	AA	AT	AA	TT	TT	AT	AA	AT	AT	AA	TT	AA	AA	AT	AA	AT	AT	AT	AT	AT	AT	AA	TT
Gm18_3841252	Gm18	3841252	137.98	C	0.32906	TT	TT	TT	TT	CC	CC	CC	CT	CT	CC	CT	CT	CC	CC	TT	CT	CC	CC	CT	CT	TT	TT	CT	CT	CT	CC	CT	TT	TT	CT	TT	CC	TT	TT	TT	CT	CC	TT	CT	CT	CT	CT	CT	CT
Gm19_48599286	Gm19	48599286	0	C	0.324786	CC	CT	CC	CT	TT	CT	CT	CC	CT	TT	CC	CT	CT	TT	CT	TT	CT	CT	CT	TT	TT	CC	CC	CT	TT	CT	TT	CC	TT	CT	TT	CC	CC	TT	CC	TT	TT	TT	CT	CC	CT	TT	CT	TT
Gm19_48542805	Gm19	48542805	0.22	T	0.32906	TT	TG	TT	TG	GG	TG	TG	TT	TG	GG	TT	TG	TG	GG	TG	GG	TG	TG	TG	GG	GG	TT	TT	TG	GG	TG	GG	TT	GG	TG	GG	TT	TT	GG	TT	GG	GG	GG	TG	TT	TG	GG	TG	GG
Gm19_48477914	Gm19	48477914	0.43	A	0.333333	AA	AG	AA	AG	GG	AG	AG	AA	AG	GG	AA	AG	AG	GG	AG	GG	AG	AA	AG	GG	GG	AA	AA	AG	GG	AG	GG	AA	GG	AG	GG	AA	AA	GG	AA	GG	GG	GG	AG	AA	AG	GG	AG	GG
Gm19_45926490	Gm19	45926490	21.81	A	0.282051	AG	GG	AA	AG	GG	AG	AA	AA	AG	AG	AA	AG	AA	GG	AG	GG	AG	AA	AG	AG	GG	AA	AG	AG	GG	AG	GG	AG	AG	AG	GG	AG	AG	AG	AA	GG	GG	AG	AG	AG	AG	GG	AG	GG
Gm19_45926473	Gm19	45926473	22.03	A	0.286325	AG	GG	AA	AG	GG	AG	AA	AA	AG	AG	AA	AG	AA	GG	AG	GG	AG	AA	AG	AG	GG	AA	AG	AG	GG	AG	GG	AG	AG	AG	GG	AG	AG	AG	AA	GG	GG	AG	AG	AG	AG	GG	AG	GG
Gm19_45200318	Gm19	45200318	30.93	G	0.311966	GA	AA	GG	GA	AA	GA	GG	GG	GA	AA	GG	GA	GG	AA	GA	AA	GA	GG	GG	GA	AA	GG	GA	GA	AA	GA	GG	GA	GA	GA	AA	AA	GA	GA	GG	AA	AA	GA	GA	GA	GA	AA	GA	AA
Gm19_45504938	Gm19	45504938	32.67	G	0.311966	GC	CC	GG	GC	CC	GC	GG	GG	GC	CC	GG	GC	GG	CC	GC	CC	GC	GG	GC	GC	CC	GG	GG	GC	CC	GC	GG	GC	GC	GC	CC	CC	GC	GC	GG	CC	CC	GC	GC	GC	GC	CC	GC	CC
Gm19_45504909	Gm19	45504909	33.1	T	0.311966	TC	CC	TT	TC	CC	TC	TT	TT	TC	CC	TT	TC	TT	CC	TT	CC	TC	TT	TC	TC	CC	TT	TT	TC	CC	TC	TT	TC	TC	TC	CC	CC	TC	TC	TT	CC	CC	TC	TC	TC	TC	CC	TC	CC
Gm19_45099065	Gm19	45099065	36.18	A	0.307692	AT	TT	AA	AT	TT	AT	AA	AA	AT	TT	AT	AT	AA	TT	AT	TT	AT	AA	AA	AT	TT	AA	AT	AT	TT	AT	AA	AT	AT	AT	TT	TT	AT	AT	AA	TT	TT	AT	AT	AT	AT	TT	AT	TT
Gm19_45099119	Gm19	45099119	37.92	G	0.316239	GA	AA	GG	GA	AA	GA	GG	GG	GG	AA	GA	GA	GG	AA	GA	AA	GG	GG	GG	GA	AA	GG	GA	GA	AA	GA	GG	GA	GA	GA	AA	AA	GA	GA	GG	AA	AA	GA	GA	GG	GA	AA	GA	AA
Gm19_45099123	Gm19	45099123	38.14	G	0.316239	GA	AA	GG	GA	AA	GA	GG	GG	GG	AA	GA	GA	GG	AA	GA	AA	GG	GG	GG	GA	AA	GG	GA	GA	AA	GA	GG	GA	GA	GA	AA	AA	GA	GA	GG	AA	AA	GA	GA	GG	GA	AA	GA	AA
Gm19_45099039	Gm19	45099039	38.79	A	0.316239	AC	CC	AA	AC	CC	AC	AA	AA	AC	CC	AC	AC	AA	CC	AC	CC	AC	AA	AA	AC	CC	AA	AC	AC	CC	AC	AA	AC	AC	AC	CC	CC	AC	AC	AA	CC	CC	AC	AC	AC	AC	CC	AC	CC
Gm19_44787485	Gm19	44787485	40.1	A	0.311966	AG	GG	AA	AG	GG	AG	AA	AA	AG	GG	AG	AG	AA	GG	AG	GG	AG	AA	AA	AG	GG	AA	AA	AG	GG	AG	AA	AG	AG	AG	GG	GG	AG	AG	AA	GG	GG	AG	AG	AG	AG	GG	AG	GG
Gm19_44876533	Gm19	44876533	40.53	A	0.307692	AG	GG	AA	AG	GG	AG	AA	AA	AG	GG	AG	AG	AA	GG	AG	GG	AG	AA	AA	AG	GG	AA	AA	AG	GG	AG	AA	AG	AG	AG	GG	GG	AG	AG	AA	GG	GG	AG	AG	AG	AG	GG	AG	GG
Gm19_45012153	Gm19	45012153	45.65	C	0.286325	CG	GG	CC	CG	GG	CG	CC	CC	CG	CG	CG	CG	CC	GG	CG	GG	CG	CC	CC	CG	GG	CC	CC	CG	GG	CG	CC	CG	CG	CG	GG	GG	CG	CG	CC	GG	GG	CG	CG	CG	CG	GG	CG	GG
Gm19_42249226	Gm19	42249226	66.53	C	0.282051	CT	CC	CT	CT	CT	CT	TT	TT	TT	CT	CT	CT	TT	CT	CT	CC	CT	TT	TT	CT	TT	TT	TT	CT	CC	CT	TT	CC	TT	CT	CT	CC	CT	CT	TT	CC	CC	TT	CC	CT	CC	CC	CT	CC
Gm19_41940893	Gm19	41940893	66.96	T	0.282051	TC	CC	TC	TC	TC	TC	TT	TT	TT	TC	TC	TC	TT	TC	TC	CC	TC	TT	TT	TC	TT	TT	TT	TC	CC	TC	TT	CC	TT	TC	TC	CC	TC	TC	TT	CC	CC	TT	CC	TC	CC	CC	TC	CC
Gm19_42289258	Gm19	42289258	69.15	C	0.273504	CT	CC	CT	CT	CT	CT	TT	CC	TT	CT	CT	CT	TT	CT	CT	CC	CT	TT	TT	CT	TT	TT	TT	CT	CC	CT	TT	CC	TT	CC	CT	CC	CT	CT	TT	CC	CC	TT	CC	CT	CC	CC	CT	CC
Gm19_42289235	Gm19	42289235	69.37	A	0.273504	AG	AA	AG	AG	AG	AG	GG	AA	GG	AG	AG	AG	GG	AG	AG	AA	AG	GG	GG	AG	GG	GG	GG	AG	AA	AG	GG	AA	GG	AA	AG	AA	AG	AG	GG	AA	AA	GG	AA	AG	AA	AA	AG	AA
Gm19_42071130	Gm19	42071130	70.24	T	0.277778	TC	TT	TC	TC	TC	TC	CC	TT	CC	TC	TC	TC	CC	TC	TC	TT	TC	CC	CC	TC	CC	CC	CC	TC	TT	TC	CC	TT	CC	TT	TC	TT	TC	TC	CC	TT	TT	CC	TT	TC	TT	TT	TC	TT
Gm19_41863733	Gm19	41863733	71.32	C	0.277778	CT	CC	CT	CT	CT	CT	TT	CC	TT	CT	CT	CT	TT	CT	CT	CC	CT	TT	TT	CT	TT	TT	TT	CT	CC	CT	TT	CC	TT	CC	CT	CC	CT	CT	TT	CC	CC	TT	CC	CT	CC	CC	CT	CC
Gm19_41863711	Gm19	41863711	71.97	T	0.277778	TC	TT	TC	TC	TC	TC	CC	TT	CC	TC	TC	TC	CC	TC	TC	TT	TC	CC	CC	TC	CC	CC	CC	TC	TT	TC	CC	TT	CC	TT	TC	TT	TC	TC	CC	TT	TT	CC	TT	TC	TT	TT	TC	TT
Gm19_41863699	Gm19	41863699	72.19	C	0.277778	CA	CC	CA	CA	CA	CA	AA	CC	AA	CA	CA	CA	AA	CA	CA	CC	CA	AA	AA	CA	AA	AA	AA	CA	CC	CA	AA	CC	AA	CC	CA	CC	CA	CA	AA	CC	CC	AA	CC	CA	CC	CC	CA	CC
Gm19_41714480	Gm19	41714480	73.28	T	0.277778	TC	TT	TC	TC	TC	TC	CC	TT	CC	TC	TC	TC	CC	TC	TC	TT	TC	CC	CC	TC	CC	CC	CC	TC	TT	TC	CC	TT	CC	TT	TC	TT	TC	TC	CC	TT	TT	CC	TT	TC	TT	TT	TC	TT
Gm19_41595840	Gm19	41595840	73.49	C	0.277778	CT	CC	CT	CT	CT	CT	TT	CC	TT	CT	CT	CT	TT	CT	CT	CC	CT	TT	TT	CT	TT	TT	TT	CT	CC	CT	TT	CC	TT	CC	CT	CC	CT	CT	TT	CC	CC	TT	CT	CT	CC	CC	CT	CC
Gm19_41274243	Gm19	41274243	76.13	A	0.294872	AT	TT	AT	AT	AT	AT	AA	AA	AA	AT	AT	TT	AA	AT	AT	TT	AT	AA	AA	AT	AA	AA	AA	AT	TT	AT	AA	TT	AA	AT	AT	TT	AT	AT	AA	TT	TT	AA	AT	AT	TT	TT	AT	TT
Gm19_41187244	Gm19	41187244	76.78	A	0.307692	AG	GG	AG	AG	AG	AG	AA	AA	AA	AG	AG	GG	AA	AG	AG	GG	AG	AA	AA	AG	AA	AA	AA	AG	GG	AG	AA	GG	AA	AG	AG	GG	AG	AG	AA	GG	GG	AA	AG	AG	GG	GG	AG	GG
Gm19_41187224	Gm19	41187224	76.99	C	0.303419	CT	TT	CT	CT	CT	CT	CC	CC	CC	CT	CT	TT	CC	CT	CT	TT	CT	CC	CC	CT	CC	CC	CC	CT	TT	CT	CC	TT	CC	CT	CT	TT	CT	CT	CC	TT	TT	CC	CT	CT	TT	TT	CT	TT
Gm19_41144927	Gm19	41144927	77.21	A	0.303419	AG	GG	AG	AG	AG	AG	AA	AA	AA	AG	AG	GG	AA	AG	AG	GG	AG	AA	AA	AG	AA	AA	AA	AG	GG	AG	AA	GG	AA	AG	AG	GG	AG	AG	AA	GG	GG	AA	AG	AG	GG	AG	AG	GG
Gm19_40933202	Gm19	40933202	78.74	C	0.303419	AA	CC	CA	CA	CA	CA	AA	AA	AA	CA	CA	CC	AA	CA	CA	CC	CC	AA	AA	CA	AA	AA	AA	CA	CC	CA	AA	CC	AA	CA	CA	CC	CA	CA	AA	CC	CC	AA	CA	CA	CC	CA	CA	CC
Gm19_40933210	Gm19	40933210	78.95	C	0.303419	TT	CC	CT	CT	CT	CT	TT	TT	TT	CT	CT	CC	TT	CT	CT	CC	CC	TT	TT	CT	TT	TT	TT	CT	CC	CT	TT	CC	TT	CT	CT	CC	CT	CT	TT	CC	CC	TT	CT	CT	CC	CT	CT	CC
Gm19_40917568	Gm19	40917568	79.39	C	0.303419	CC	TT	CT	CT	CT	CT	CC	CC	CC	CT	CT	TT	CC	CT	CT	TT	TT	CC	CC	CT	CC	CC	CC	CT	TT	CT	CC	TT	CC	CT	CT	TT	CT	CT	CC	TT	TT	CC	CT	CT	TT	CT	CT	TT
Gm19_40787312	Gm19	40787312	80.26	C	0.311966	CC	TT	CT	CT	CT	CT	CC	CC	CC	CT	CT	TT	CC	CT	CT	CT	TT	CC	CC	CT	CC	CC	CC	CT	TT	CT	CC	TT	CC	CT	CT	TT	CT	CT	CC	CT	TT	CC	CT	TT	TT	CT	CT	TT
Gm19_40527648	Gm19	40527648	83.11	C	0.311966	CC	TT	CT	CT	CT	CT	CC	CC	CC	CT	CT	TT	CC	CT	CT	CT	TT	CT	CC	CT	CC	CT	CC	CT	TT	CT	CC	TT	CC	CT	CT	TT	CT	CT	CC	CT	TT	CC	CT	TT	TT	CT	CT	TT
Gm19_40527610	Gm19	40527610	83.33	T	0.311966	TT	CC	TC	TC	TC	TC	TT	TT	TT	TC	TC	CC	TT	TC	TC	TC	CC	TC	TT	TC	TT	TC	TT	TC	CC	TC	TT	CC	TT	TC	TC	CC	TC	TC	TT	TC	CC	TT	TC	CC	CC	TC	TC	CC
Gm19_39400976	Gm19	39400976	88.87	A	0.299145	AA	GG	AG	AG	AG	AG	AA	AA	AA	AG	AG	GG	AA	AG	AG	AG	GG	AG	AA	AG	AG	AG	AA	AG	GG	AG	AG	GG	AA	AG	AG	AG	AG	GG	AA	AG	GG	AG	AG	GG	GG	AA	AG	GG
Gm19_39406498	Gm19	39406498	89.09	A	0.303419	AA	GG	AG	AG	AG	AG	AA	AA	AA	AG	AG	GG	AA	AG	AG	AG	GG	AG	AA	AG	AG	AG	AA	AG	GG	AG	AG	GG	AA	AG	AG	AG	AG	GG	AA	AG	GG	AG	AG	GG	GG	AA	AG	GG
Gm19_39494077	Gm19	39494077	89.52	T	0.294872	AA	TT	TA	TA	TA	TA	AA	AA	AA	TA	TA	TT	AA	TA	TA	TA	TT	TA	AA	TA	TA	TA	AA	TA	TT	TA	TA	TT	AA	TA	TA	TA	TA	TT	AA	TA	TT	TA	TA	TT	TT	AA	TA	TT
Gm19_39751656	Gm19	39751656	91.71	A	0.290598	GG	AA	AG	AG	AG	AG	GG	AA	GG	AG	AG	AA	GG	AG	AG	AG	AA	AG	GG	AG	AG	AG	GG	AG	AA	AG	AG	AA	GG	AA	AG	AA	AG	AA	GG	AG	AA	GG	AG	AA	AA	GG	AG	AA
Gm19_40032457	Gm19	40032457	92.8	T	0.286325	CC	TT	TC	TC	TC	TC	CC	TT	CC	TC	TC	TT	CC	TC	TC	TC	TT	TC	CC	TC	TC	TC	CC	TC	TT	TC	TC	TT	CC	TT	TC	TT	TC	TT	CC	TC	TT	CC	TC	TT	TT	CC	TC	TT
Gm19_39934875	Gm19	39934875	93.68	C	0.286325	CC	TT	CT	CT	CT	CT	CC	TT	CC	CT	CT	TT	CC	CT	CT	CT	TT	CT	CC	CT	CT	CT	CC	CT	TT	CT	CT	TT	CC	TT	CT	TT	CT	TT	CC	CT	TT	CC	CT	TT	TT	CC	CT	TT
Gm19_39751611	Gm19	39751611	94.33	C	0.286325	AA	CC	CA	CA	CA	CA	AA	CC	AA	CA	CA	CC	AA	CA	CA	CA	CC	CA	AA	CA	CA	CA	AA	CA	CC	CA	CA	CC	AA	CC	CA	CC	CA	CC	AA	CA	CC	AA	CA	CC	CC	AA	CA	CC
Gm19_39194527	Gm19	39194527	96.29	A	0.303419	AA	CC	AC	AC	AC	AC	AA	CC	AA	AC	AC	CC	AA	AC	AC	AC	CC	AC	AA	AC	AC	AC	AA	AC	CC	AC	AC	CC	AA	CC	AC	AC	AC	CC	AA	AA	CC	AC	AC	CC	CC	AA	AC	CC
Gm19_38717509	Gm19	38717509	101.15	C	0.290598	CC	GG	CG	CG	CG	CG	CC	GG	CC	CG	CG	GG	CC	CG	CG	CG	GG	CG	CC	CG	CG	CG	CG	CG	GG	CG	CG	CG	CC	GG	CG	CC	CG	GG	CC	CC	GG	CG	CG	GG	GG	CC	CG	GG
Gm19_36371415	Gm19	36371415	117.96	T	0.294872	TT	TG	TG	TG	TG	TG	TT	GG	TG	TG	TG	TG	TT	GG	TG	TG	TG	TG	TT	TG	TG	TG	TG	GG	GG	GG	TG	TG	TT	GG	TT	TT	GG	GG	TT	TT	GG	TG	TT	TG	TG	TT	TT	TT
Gm19_35852119	Gm19	35852119	118.39	T	0.294872	TT	TC	TC	TC	TC	TC	TT	CC	TC	TC	TC	TC	TT	CC	TC	TC	TC	TC	TT	TC	TC	TC	TC	CC	CC	CC	TC	TC	TT	CC	TT	TT	CC	CC	TT	TT	CC	TC	TT	TC	TC	TT	TT	TT
Gm19_35012464	Gm19	35012464	119.7	T	0.286325	TT	TC	TC	TC	TC	TC	TT	CC	TC	TC	TC	TC	TT	CC	TC	TC	TC	TC	TT	TC	TC	TC	TC	CC	CC	CC	TC	TC	TT	CC	TT	TT	CC	CC	TT	TT	CC	TC	TT	TC	TC	TT	TT	TT
Gm19_35125364	Gm19	35125364	119.92	C	0.286325	CC	CT	CT	CT	CT	CT	CC	TT	CT	CT	CT	CT	CC	TT	CT	CT	CT	CT	CC	CT	CT	CT	CT	TT	TT	TT	CT	CT	CC	TT	CC	CC	TT	TT	CC	CC	TT	CT	CC	CT	CT	CC	CC	CC
Gm19_34561866	Gm19	34561866	122.1	A	0.299145	AA	AG	AG	AG	AG	AG	AA	AG	AG	AG	AG	AG	AA	GG	AG	AG	AG	AG	AA	AG	AG	AG	AG	GG	GG	GG	AG	AG	AA	GG	AA	AA	GG	GG	AA	AA	GG	AG	AA	AG	AG	AA	AA	AA
Gm19_34374075	Gm19	34374075	122.32	C	0.303419	CC	CT	CT	CT	CT	CT	CC	CT	CT	CT	CT	CT	CC	TT	CT	CT	CT	CT	CC	CT	CT	CT	CT	TT	TT	TT	CT	CT	CC	TT	CC	CC	TT	TT	CC	CC	TT	CT	CC	CT	CT	CC	CC	CC
Gm19_29126339	Gm19	29126339	126.3	A	0.290598	AG	AG	AG	AG	AG	AG	GG	AG	AG	AA	AG	AG	GG	AA	AG	AA	AG	AG	GG	AG	AG	AG	AG	AA	AA	AA	AG	AG	GG	AA	GG	GG	AA	AA	GG	GG	AA	AG	GG	AG	AG	GG	GG	GG
Gm19_27421449	Gm19	27421449	127.6	T	0.277778	TC	TC	TC	TC	TC	TC	CC	TC	TC	TT	TC	TC	CC	TT	TC	TT	TC	TC	CC	TT	TC	TC	TC	TT	TT	TT	TT	TC	CC	TT	CC	TC	TT	TT	CC	CC	TT	TC	CC	TC	TC	CC	CC	CC
Gm19_27217030	Gm19	27217030	128.25	G	0.277778	GA	GA	GA	GA	GA	GA	AA	GA	GA	GG	GA	GA	AA	GG	GA	GG	GA	GA	AA	GG	GA	GA	GA	GG	GG	GG	GG	GA	AA	GG	AA	GA	GG	GG	AA	AA	GG	GA	AA	GA	GA	AA	AA	AA
Gm19_27216981	Gm19	27216981	128.69	A	0.277778	AG	AG	AG	AG	AG	AG	GG	AG	AG	AA	AG	AG	GG	AA	AG	AA	AG	AG	GG	AA	AG	AG	AG	AA	AA	AA	AA	AG	GG	AA	GG	AG	AA	AA	GG	GG	AA	AG	GG	AG	AG	GG	GG	GG
Gm19_27216995	Gm19	27216995	128.9	C	0.273504	CT	CT	CT	CT	CT	CT	TT	CT	CT	CC	CT	CT	TT	CC	CT	CC	CT	CT	TT	CC	CT	CT	CT	CC	CC	CC	CC	CT	TT	CC	TT	CT	CC	CC	TT	TT	CC	CT	TT	CT	CT	TT	TT	TT
Gm19_18927669	Gm19	18927669	129.34	A	0.273504	AG	AG	AG	AG	AG	AG	GG	AG	AG	AA	AG	AG	GG	AA	AG	AA	AG	AG	GG	AA	AG	AG	AG	AA	AA	AA	AA	AG	GG	AA	GG	AG	AA	AA	GG	GG	AA	AG	GG	AG	AG	GG	GG	GG
Gm19_11518245	Gm19	11518245	131.52	T	0.290598	TC	TC	TC	TC	TT	TC	CC	TC	TC	TT	TC	CC	CC	TT	TC	TT	TC	TC	CC	TT	TC	TC	TC	TT	TT	TT	TT	TC	CC	TT	CC	TC	TT	TT	CC	CC	TT	TC	CC	TC	TC	CC	CC	CC
Gm19_11518209	Gm19	11518209	133.05	A	0.286325	AG	AG	AG	AG	AA	AG	GG	AG	AG	AA	AG	GG	GG	AA	AG	AA	AG	AG	GG	AA	AG	AG	AG	AA	AA	AA	AA	AG	GG	AA	GG	AG	AA	AA	GG	GG	AA	AG	GG	AG	AG	GG	GG	GG
Gm19_21001104	Gm19	21001104	134.58	A	0.277778	AG	AG	AG	AG	AG	AG	GG	AG	AG	AA	AG	AG	GG	AA	AG	AA	AG	AG	GG	AA	AG	AG	AG	AA	AA	AA	AA	AG	GG	AA	GG	AG	AA	AA	GG	GG	AA	AG	GG	AG	AG	GG	GG	GG
Gm19_17322262	Gm19	17322262	135.23	T	0.277778	TG	TG	TG	TG	TG	TG	GG	TG	TG	TT	TG	TG	GG	TT	TG	TT	TG	TG	GG	TT	TG	TG	TG	TT	TT	TT	TT	TG	GG	TT	GG	TG	TT	TT	GG	GG	TT	TG	GG	TG	TG	GG	GG	GG
Gm19_17322267	Gm19	17322267	135.44	T	0.282051	TC	TC	TC	TC	TC	TC	CC	TC	TC	TT	TC	TC	CC	TT	TC	TT	TC	TC	CC	TT	TC	TC	TC	TT	TT	TT	TT	TC	CC	TT	CC	TC	TT	TT	CC	CC	TT	TC	CC	TC	TC	CC	CC	CC
Gm19_15544134	Gm19	15544134	136.54	G	0.286325	GA	GA	GA	GA	GA	GA	AA	GA	GA	GG	GA	GA	AA	GG	GA	GG	GA	GA	AA	GG	GA	GA	GA	GG	GG	GG	GG	GA	AA	GG	AA	GA	GG	GG	AA	AA	GG	GA	AA	GA	GG	AA	AA	AA
Gm19_10294578	Gm19	10294578	138.29	T	0.294872	TG	TG	TG	TG	TG	TG	GG	TG	TG	TT	TG	TG	GG	TT	TG	TT	TG	TG	GG	TT	TG	TG	TG	TT	TT	TT	TT	TG	GG	TT	GG	TT	TT	TT	GG	GG	TT	TG	GG	TG	TT	GG	GG	GG
Gm19_22876141	Gm19	22876141	139.6	T	0.277778	TC	TC	TC	TC	TC	TC	CC	TC	TC	TT	TC	TT	CC	TT	TC	TT	TC	TC	CC	TT	TC	TC	TC	TT	TT	TT	TT	TC	CC	TT	CC	TC	TT	TT	CC	CC	TT	TC	CC	TC	TC	CC	CC	CC
Gm19_11578260	Gm19	11578260	141.86	A	0.311966	AC	AC	AC	AC	AC	AC	CC	AC	AC	AA	AC	AA	CC	AA	AA	AA	AC	AC	CC	AA	AC	AC	AC	AA	AA	AA	AA	AC	CC	AA	CC	AC	AA	AA	CC		AA	AC		AC	AC	CC	CC	CC
Gm19_22876159	Gm19	22876159	144.36	G	0.277778	GT	GT	GT	GT	GT	GT	TT	GT	GT	GG	GT	GG	TT	GG	GT	GG	GT	GT	TT	GG	GT	GT	GT	GG	GG	GG	GG	GT	TT	GG	TT	GT	GG	GG	TT	TT	GG	GT	TT	GT	GT	TT	TT	TT
Gm19_9478156	Gm19	9478156	144.57	A	0.277778	AG	AG	AG	AG	AG	AG	GG	AG	AG	AA	AG	AG	GG	AA	AG	AA	AG	AG	GG	AA	AG	AG	AG	AA	AA	AA	AA	AG	GG	AA	GG	AG	AA	AA	GG	GG	AA	AG	GG	AG	AG	GG	GG	GG
Gm19_9858198	Gm19	9858198	145.44	C	0.273504	CT	CT	CT	CT	CT	CT	TT	CT	CT	CC	CT	CT	TT	CC	CT	CC	CT	CT	TT	CC	CT	CT	CT	CC	CC	CC	CC	CT	TT	CC	TT	CT	CC	CC	TT	TT	CC	CT	TT	CT	CT	TT	TT	TT
Gm19_17012463	Gm19	17012463	146.97	G	0.273504	GA	GA	GA	GA	GA	GA	AA	GA	GA	GG	GA	GA	AA	GG	GA	GG	GA	GA	AA	GG	GA	GA	GA	GG	GG	GG	GG	GA	AA	GG	AA	GA	GG	GG	AA	AA	GG	GA	AA	GA	GA	AA	AA	AA
Gm19_11354777	Gm19	11354777	147.84	T	0.277778	TC	TC	TC	TC	TC	TC	CC	TC	TC	TT	TC	TC	CC	TT	TC	TT	TC	TC	CC	TT	TC	TC	TC	TT	TT	TT	TT	TC	CC	TT	CC	TC	TT	TT	CC	CC	TT	TC	CC	TC	TC	CC	CC	CC
Gm19_8849648	Gm19	8849648	148.27	G	0.277778	GA	GA	GA	GA	GA	GA	AA	GA	GA	GG	GA	GA	AA	GG	GA	GG	GA	GA	AA	GG	GA	GA	GA	GG	GG	GG	GG	GA	AA	GG	AA	GA	GG	GG	AA	AA	GG	GA	AA	GA	GA	AA	AA	AA
Gm19_4620074	Gm19	4620074	151.35	A	0.269231	AT	AT	AT	AT	AT	AT	TT	AT	AT	AA	AA	AT	TT	AA	AT	AA	AT	AT	AT	AA	AT	AT	AT	AA	AA	AA	AA	AT	TT	AA	AT	AT	AA	AA	TT	TT	AA	AT	TT	AT	AT	TT	TT	TT
Gm19_2426553	Gm19	2426553	162	G	0.286325	GA	GA	GA	GA	GA	GA	AA	GA	GA	GA	GG	GA	AA	GG	GG	GG	AA	AA	GA	GG	GA	GA	GA	GG	GG	GG	GG	GG	GA	GG	GA	GA	GG	GG	AA	AA	GG	GA	AA	GA	GA	AA	AA	AA
Gm19_2152444	Gm19	2152444	164.86	C	0.282051	CT	CT	CT	CT	CT	CT	TT	CT	CT	CT	CC	CT	TT	CC	CC	CC	TT	TT	CT	CC	CT	CT	CT	CT	CC	CC	CC	CC	CT	CC	CT	CT	CC	CC	TT	TT	CC	CT	TT	CT	CC	TT	TT	TT
Gm19_1985708	Gm19	1985708	165.94	T	0.290598	TC	TC	TC	TC	TC	TC	CC	TC	TC	TC	TT	TC	CC	TT	TT	TT	CC	CC	TC	TT	TC	TC	TC	TC	TT	TT	TT	TT	TC	TT	TC	TC	TT	TT	CC	CC	TT	TC	CC	TC	TT	CC	CC	CC
Gm19_577579	Gm19	577579	181.75	A	0.24359	AG	AG	AG	AG	AG	AG	GG	AG	AG	GG	AA	AG	GG	AA	AA	AA	GG	GG	AG	AA	AG	AG	GG	AG	AG	AA	AG	AA	AG	AA	AG	GG	AG	AG	AA	GG	AG	AA	GG	AG	AA	GG	GG	GG
Gm19_534866	Gm19	534866	181.97	C	0.24359	CG	CG	CG	CG	CG	CG	GG	CG	CG	GG	CC	CG	GG	CC	CC	CC	GG	CG	CG	CC	CG	CG	GG	CG	CG	CC	CG	CC	CG	CC	CG	GG	CG	CG	CC	GG	CG	CC	GG	CG	CC	GG	GG	GG
Gm20_46802593	Gm20	46802593	0	T	0.235043	TC	CC	TT	TC	CC	CC	TC	CC	TT	CC	CC	TC	CC	TC	TC	CC	TT	TC	TT	CC	CC	TT	CC	TC	TT	TC	TC	TC	TC	TT	TC	TC	TC	CC	TC	CC	TC	TT	TC	TC	TC	TT	TT	TC
Gm20_44578453	Gm20	44578453	9.49	A	0.235043	AA	CC	AA	AC	CC	AC	AC	CC	AC	CC	CC	AC	CC	AC	AC	CC	AA	AA	AA	CC	CC	AA	CC	AC	AA	AC	AA	AC	AC	AA	AC	AC	CC	CC	AC	CC	AC	CC	AC	AC	AC	AA	AA	AC
Gm20_44384639	Gm20	44384639	14.87	A	0.290598	AA	TT	AA	AT	TT	AT	AT	TT	AT	AA	TT	AT	TT	AT	AT	TT	AA	AA	AA	TT	TT	AA	TT	AT	AA	AT	AA	AT	AT	AA	AT	AT	TT	TT	AT	TT	AT	TT	AT	AT	AT	AA	AA	AA
Gm20_44430740	Gm20	44430740	15.08	C	0.290598	CC	TT	CC	CT	TT	CT	CT	TT	CT	CC	TT	CT	TT	CT	CT	TT	CC	CC	CC	TT	TT	CC	TT	CT	CC	CT	CC	CT	CT	CC	CT	CT	TT	TT	CT	TT	CT	TT	CT	CT	CT	CC	CC	CC
Gm20_44430738	Gm20	44430738	15.52	G	0.290598	GG	CC	GG	GC	CC	GC	GC	CC	GC	GG	CC	GC	CC	GC	GC	CC	GG	GG	GG	CC	CC	GG	CC	GC	GG	GC	GG	GC	GC	GG	GC	GC	CC	CC	GC	CC	GC	CC	GC	GC	GC	GG	GG	GG
Gm20_45634809	Gm20	45634809	18.15	C	0.290598	CT	TT	CC	CT	TT	CT	CT	TT	CT	CC	TT	CT	TT	CT	CT	TT	CC	CC	CC	TT	TT	CC	TT	CT	CC	CT	CC	CT	CT	CC	CT	CT	TT	TT	CT	TT	CT	TT	CT	CT	CT	CC	CC	CC
Gm20_45803172	Gm20	45803172	19.02	G	0.290598	GT	TT	GG	GT	TT	GT	GT	TT	GT	GG	TT	GT	TT	GT	GT	TT	GG	GG	GG	TT	TT	GG	TT	GT	GG	GT	GG	GT	GT	GG	GT	GT	TT	TT	GT	TT	GT	TT	GT	GT	GT	GG	GG	GG
Gm20_45012291	Gm20	45012291	21.2	T	0.294872	TT	CC	TT	TC	CC	TC	TC	CC	TC	TT	CC	TC	CC	TC	TC	CC	TT	TT	TT	CC	CC	TT	CC	TC	TT	TC	TT	TC	TC	TT	TC	TC	CC	CC	TC	CC	TC	CC	TC	TC	TC	TT	TT	TT
Gm20_44838537	Gm20	44838537	21.42	T	0.294872	TT	CC	TT	TC	CC	TC	TC	CC	TC	TT	CC	TC	CC	TC	TC	CC	TT	TT	TT	CC	CC	TT	CC	TC	TT	TC	TT	TC	TC	TT	TC	TC	CC	CC	TC	CC	TC	CC	TC	TC	TC	TT	TT	TT
Gm20_44724889	Gm20	44724889	22.07	C	0.303419	CC	AA	CC	CA	AA	CA	CA	AA	CA	CC	AA	CA	AA	CC	CA	AA	CC	CC	CC	AA	AA	CC	AA	CA	CC	CA	CC	CA	CA	CC	CA	CA	AA	AA	CA	AA	CA	AA	CA	CA	CA	CC	CC	CC
Gm20_44724930	Gm20	44724930	22.28	A	0.299145	AA	GG	AA	AG	GG	AG	AG	GG	AG	AA	GG	AG	GG	AA	AG	GG	AA	AA	AA	GG	GG	AA	GG	AG	AA	AG	AA	AG	AG	AA	AG	AG	GG	GG	AG	GG	AG	GG	AG	AG	AG	AA	AA	AA
Gm20_41733671	Gm20	41733671	35.45	T	0.333333	TT	CC	TT	TC	CC	TC	CC	TC	TT	TT	CC	TC	CC	TC	TC	TC	TC	TT	TT	CC	CC	TT	TC	TC	TT	TC	TT	TC	TC	TT	TC	TC	CC	CC	CC	CC	TC	CC	TT	TC	TT	TC	TT	TT
Gm20_28471713	Gm20	28471713	109.45	G	0.277778	GG	AA	AA	GA	GG	GG	GG	GA	AA	GA	AA	AA	GA	AA	GA	GA	GA	AA	GA	GA	GA	GG	GA	GA	GA	GG	GA	GG	GA	GA	GA	GA	GG	GG	GG	GG	AA	AA	AA	AA	GA	AA	AA	AA
Gm20_28302618	Gm20	28302618	110.1	A	0.273504	AA	GG	GG	AG	AA	AA	AA	AG	GG	AG	GG	GG	AG	GG	AG	AG	AG	GG	AG	AG	AG	AA	AG	AG	AG	AA	AG	AA	AG	AG	AG	AG	AA	AA	AA	AA	GG	GG	GG	GG	AG	GG	GG	GG
Gm20_28011301	Gm20	28011301	110.32	T	0.273504	TT	CC	CC	TC	TT	TT	TT	TC	CC	TC	CC	CC	TC	CC	TC	TC	TC	CC	TC	TC	TC	TT	TC	TC	TC	TT	TC	TT	TC	TC	TC	TC	TT	TT	TT	TT	CC	CC	CC	CC	TC	CC	CC	CC
Gm20_27618803	Gm20	27618803	110.75	C	0.273504	CC	TT	TT	CT	CC	CC	CC	CT	TT	CT	TT	TT	CT	TT	CT	CT	CT	TT	CT	CT	CT	CC	CT	CT	CT	CC	CT	CC	CT	CT	CT	CT	CC	CC	CC	CC	TT	TT	TT	TT	CT	TT	TT	TT
Gm20_15630953	Gm20	15630953	112.28	C	0.277778	CC	GG	GG	CG	CC	CC	CC	CG	GG	CG	GG	GG	CG	GG	CG	CG	CG	GG	CG	CG	CG	CC	CG	CG	CG	CC	CG	CC	CG	CG	CG	CG	CC	CC	CC	CC	GG	GG	GG	GG	CG	CG	GG	GG
Gm20_2232036	Gm20	2232036	125.73	T	0.264957	GG	TT	TT	TG	GG	GG	GG	TG	TT	TG	TG	TT	TG	TT	TG	TG	TG	TT	TG	TG	TG	GG	TG	TG	TG	GG	TG	GG	TT	TG	TG	TG	GG	GG	GG	GG	TT	TT	TT	TT	TT	TG	TG	TT
Gm20_2106955	Gm20	2106955	126.6	C	0.269231	AA	CC	CC	CA	AA	AA	AA	CA	CC	CA	CA	CC	CA	CC	CA	CA	CA	CC	CA	CA	CA	AA	CA	CA	CA	AA	CA	AA	CC	CA	CA	CA	AA	AA	CA	AA	CC	CC	CC	CC	CC	CA	CA	CC
Gm20_1514424	Gm20	1514424	131.79	T	0.269231	CC	TT	TT	TC	CC	TC	CC	TC	TT	TC	TC	TT	TC	TT	TT	TC	TC	TT	TC	TC	TC	CC	TC	TC	TC	CC	TC	CC	TT	TT	TC	TC	CC	CC	TC	CC	TT	TC	TC	TT	TT	TC	TC	TT
Gm20_1098303	Gm20	1098303	139.12	A	0.252137	GG	AA	AA	AG	GG	AG	GG	AG	AA	AG	AG	AA	AG	AA	AG	AG	AG	AA	AG	AG	GG	GG	AG	AG	AG	GG	AG	GG	AA	AG	AG	AG	GG	GG	AG	AA	AA	AG	AG	AA	AA	AG	AG	AA
Gm20_288990	Gm20	288990	153.86	C	0.230769	CT	CC	CT	CT	CT	CT	TT	CC	CC	CC	CT	CC	TT	CC	CT	CT	CT	CC	CC	CT	TT	CT	CT	CT	CC	TT	CT	CT	CC	CT	CT	CT	CT	CT	CC	CC	CC	TT	TT	CC	CC	CC	CT	CT
Gm20_11252	Gm20	11252	156.27	G	0.235043	GT	GG	GT	GT	GT	GT	TT	GG	GG	GG	GT	GG	TT	GG	GT	GT	GT	GG	GG	GT	TT	GT	GT	GT	GG	TT	GT	GT	GG	GT	GT	GT	GT	GT	GG	GG	GG	TT	TT	GG	GG	GT	GT	GT
Gm20_289016	Gm20	289016	162.59	T	0.303419	TC	TT	TC	TC	TC	TC	CC	TT	TT	TT	TC	TT	CC	TT	TT	TC	TC	TT	TT	TT	CC	TC	TC	TC	TT	CC	TC	TC	TT	TT	TC	TC	TC	TT	TT	TT	TT	CC	TT	TT	TT	TT	TC	TC
[truncated: 190 more columns]
