# Supplementary material for: Identifying Soybean Pod Borer (Leguminivora glycinivorella) Resistance QTLs and the Mechanism of Induced Defense Using Linkage Mapping and RNA-Seq Analysis
Source: Int J Mol Sci. 2022 Sep 18;23(18):10910. doi: 10.3390/ijms231810910 (PMC9504297; doi:10.3390/ijms231810910)
Supplement: Supplementary file 1 [file ijms-23-10910-s001.zip › Table S2.xlsx]

## Sheet: Table S2
Table S2: Annotation of candidate genes in four ESP-related QTLs
Gene Locus	QTL name	Gene Ontology Biological Process IDs	Gene Ontology Biological Process Descriptions	Gene Ontology Molecular Function IDs	Gene Ontology Molecular Function Descriptions	Gene Ontology Cellular Component IDs	Gene Ontology Cellular Component Descriptions
Glyma.04G094300	qESP-4-1	GO:0006970 GO:0009657 GO:0009694 GO:0009753 GO:0010020 GO:0055085	chloroplast fission; jasmonic acid metabolic process; plastid organization; response to jasmonic acid stimulus; response to osmotic stress; transmembrane transport	GO:0005216	ion channel activity	GO:0005886 GO:0009526 GO:0016020	membrane; plasma membrane; plastid envelope
Glyma.04G094400	qESP-4-1	GO:0000911 GO:0007018 GO:0008283	cell proliferation; cytokinesis by cell plate formation; microtubule-based movement	GO:0003777 GO:0005524	ATP binding; microtubule motor activity	GO:0005634 GO:0009506	nucleus; plasmodesma
Glyma.04G094500	qESP-4-1	GO:0006487 GO:0006499 GO:0006897 GO:0009651 GO:0010228 GO:0016926 GO:0032957 GO:0046854 GO:0046855 GO:0048015 GO:0050665 GO:0055046 GO:0072593	N-terminal protein myristoylation; endocytosis; hydrogen peroxide biosynthetic process; inositol phosphate dephosphorylation; inositol trisphosphate metabolic process; microgametogenesis; phosphatidylinositol-mediated signaling; phosphatidylinositol phosphorylation; protein N-linked glycosylation; protein desumoylation; reactive oxygen species metabolic process; response to salt stress; vegetativ…	GO:0016303 GO:0016772 GO:0016773 GO:0035004	1-phosphatidylinositol-3-kinase activity; phosphatidylinositol 3-kinase activity; phosphotransferase activity, alcohol group as acceptor; transferase activity, transferring phosphorus-containing groups	GO:0005794 GO:0005942	Golgi apparatus; phosphatidylinositol 3-kinase complex
Glyma.04G094600	qESP-4-1	GO:0006164 GO:0006526 GO:0009165 GO:0042450	arginine biosynthetic process; arginine biosynthetic process via ornithine; nucleotide biosynthetic process; purine nucleotide biosynthetic process	GO:0003824 GO:0004056	argininosuccinate lyase activity; catalytic activity	GO:0009507 GO:0009570	chloroplast; chloroplast stroma
Glyma.04G094700	qESP-4-1	GO:0006259 GO:0006342 GO:0007126 GO:0008150 GO:0009887 GO:0009888 GO:0010089 GO:0010638 GO:0033044 GO:0044036 GO:0051567	DNA metabolic process; biological process; cell wall macromolecule metabolic process; chromatin silencing; histone H3-K9 methylation; meiosis; organ morphogenesis; positive regulation of organelle organization; regulation of chromosome organization; tissue development; xylem development	GO:0003674	molecular function	GO:0005737	cytoplasm
Glyma.04G094800	qESP-4-1	GO:0006333 GO:0009944 GO:0048481	chromatin assembly or disassembly; ovule development; polarity specification of adaxial/abaxial axis	GO:0003700 GO:0005515	protein binding; sequence-specific DNA binding transcription factor activity	GO:0005634	nucleus
Glyma.04G094900	qESP-4-1	GO:0006351	transcription, DNA-dependent	GO:0003677 GO:0003899 GO:0008270	DNA-directed RNA polymerase activity; DNA binding; zinc ion binding	GO:0005634	nucleus
Glyma.04G095000	qESP-4-1	GO:0006091 GO:0006354 GO:0009769 GO:0009772 GO:0010207 GO:0015979 GO:0019684	DNA-dependent transcription, elongation; generation of precursor metabolites and energy; photosynthesis; photosynthesis, light harvesting in photosystem II; photosynthesis, light reaction; photosynthetic electron transport in photosystem II; photosystem II assembly	GO:0045156 GO:0045157	electron transporter, transferring electrons within the cyclic electron transport pathway of photosynthesis activity; electron transporter, transferring electrons within the noncyclic electron transport pathway of photosynthesis activity	GO:0005737 GO:0009507 GO:0009523 GO:0009534 GO:0009535 GO:0009579 GO:0010287 GO:0016020 GO:0030076	chloroplast; chloroplast thylakoid; chloroplast thylakoid membrane; cytoplasm; light-harvesting complex; membrane; photosystem II; plastoglobule; thylakoid
Glyma.04G095100	qESP-4-1	GO:0008150	biological process	NA	NA	NA	NA
Glyma.04G095200	qESP-4-1	NA	NA	NA	NA	GO:0009507	chloroplast
Glyma.04G095300	qESP-4-1	NA	NA	GO:0003677	DNA binding	GO:0005634	nucleus
Glyma.04G095400	qESP-4-1	NA	NA	NA	NA	NA	NA
Glyma.04G095500	qESP-4-1	GO:0006888 GO:0006979 GO:0009698 GO:0009737 GO:0055114	ER to Golgi vesicle-mediated transport; oxidation-reduction process; phenylpropanoid metabolic process; response to abscisic acid stimulus; response to oxidative stress	GO:0003958 GO:0005506 GO:0010181 GO:0016491	FMN binding; NADPH-hemoprotein reductase activity; iron ion binding; oxidoreductase activity	GO:0005783 GO:0005829	cytosol; endoplasmic reticulum
Glyma.04G095600	qESP-4-1	NA	NA	NA	NA	NA	NA
Glyma.04G095700	qESP-4-1	GO:0009733 GO:0009735 GO:0009737 GO:0010267 GO:0010305 GO:0010589 GO:0031054 GO:0035196 GO:0035279 GO:0051607	defense response to virus; leaf proximal/distal pattern formation; leaf vascular tissue pattern formation; mRNA cleavage involved in gene silencing by miRNA; pre-miRNA processing; production of miRNAs involved in gene silencing by miRNA; production of ta-siRNAs involved in RNA interference; response to abscisic acid stimulus; response to auxin stimulus; response to cytokinin stimulus	GO:0003723 GO:0003725 GO:0005515 GO:0035198	RNA binding; double-stranded RNA binding; miRNA binding; protein binding	GO:0005622 GO:0005634 GO:0005737 GO:0010445	cytoplasm; intracellular; nuclear dicing body; nucleus
Glyma.04G095800	qESP-4-1	GO:0018342 GO:0046686	protein prenylation; response to cadmium ion	GO:0008318	protein prenyltransferase activity	GO:0005737 GO:0005829	cytoplasm; cytosol
Glyma.04G095900	qESP-4-1	GO:0008150	biological process	NA	NA	NA	NA
Glyma.04G096000	qESP-4-1	GO:0006468	protein phosphorylation	GO:0004672 GO:0004674 GO:0004712 GO:0004713 GO:0005524 GO:0016301 GO:0016772	ATP binding; kinase activity; protein kinase activity; protein serine/threonine/tyrosine kinase activity; protein serine/threonine kinase activity; protein tyrosine kinase activity; transferase activity, transferring phosphorus-containing groups	GO:0005634	nucleus
Glyma.04G096100	qESP-4-1	GO:0007165	signal transduction	NA	NA	GO:0005739	mitochondrion
Glyma.04G096200	qESP-4-1	GO:0006355 GO:0007623	circadian rhythm; regulation of transcription, DNA-dependent	GO:0003700 GO:0008270 GO:0043565	sequence-specific DNA binding; sequence-specific DNA binding transcription factor activity; zinc ion binding	GO:0005634	nucleus
Glyma.04G096300	qESP-4-1	GO:0006355	regulation of transcription, DNA-dependent	GO:0003700 GO:0008270 GO:0043565	sequence-specific DNA binding; sequence-specific DNA binding transcription factor activity; zinc ion binding	GO:0005634	nucleus
Glyma.04G096400	qESP-4-1	NA	NA	GO:0004869	cysteine-type endopeptidase inhibitor activity	GO:0005576 GO:0005618	cell wall; extracellular region
Glyma.04G096500	qESP-4-1	GO:0016310	phosphorylation	GO:0005524 GO:0016301	ATP binding; kinase activity	GO:0009507 GO:0009941	chloroplast; chloroplast envelope
Glyma.04G096600	qESP-4-1	GO:0009723 GO:0009825 GO:0016049	cell growth; multidimensional cell growth; response to ethylene stimulus	NA	NA	GO:0005576 GO:0005886	extracellular region; plasma membrane
Glyma.04G096700	qESP-4-1	GO:0006606 GO:0008150	biological process; protein import into nucleus	GO:0003674	molecular function	NA	NA
Glyma.04G096800	qESP-4-1	GO:0002229 GO:0034635 GO:0046686	defense response to oomycetes; glutathione transport; response to cadmium ion	NA	NA	GO:0009507 GO:0009536	chloroplast; plastid
Glyma.04G096900	qESP-4-1	GO:0006464 GO:0006511 GO:0016567 GO:0042787	cellular protein modification process; protein ubiquitination; protein ubiquitination involved in ubiquitin-dependent protein catabolic process; ubiquitin-dependent protein catabolic process	GO:0004842 GO:0016881	acid-amino acid ligase activity; ubiquitin-protein ligase activity	GO:0000151 GO:0005622 GO:0005634 GO:0005739 GO:0005829 GO:0009506 GO:0016020	cytosol; intracellular; membrane; mitochondrion; nucleus; plasmodesma; ubiquitin ligase complex
Glyma.04G097000	qESP-4-1	GO:0008150	biological process	GO:0003674	molecular function	GO:0005794 GO:0005886	Golgi apparatus; plasma membrane
Glyma.04G097100	qESP-4-1	GO:0006468	protein phosphorylation	GO:0004672 GO:0004674 GO:0005524 GO:0016301 GO:0016772	ATP binding; kinase activity; protein kinase activity; protein serine/threonine kinase activity; transferase activity, transferring phosphorus-containing groups	GO:0005634	nucleus
Glyma.04G097200	qESP-4-1	GO:0006635 GO:0009407 GO:0010583 GO:0043161 GO:0046686 GO:0051788 GO:0080129	fatty acid beta-oxidation; proteasomal ubiquitin-dependent protein catabolic process; proteasome core complex assembly; response to cadmium ion; response to cyclopentenone; response to misfolded protein; toxin catabolic process	GO:0004364	glutathione transferase activity	GO:0005737	cytoplasm
Glyma.04G097300	qESP-4-1	GO:0009407 GO:0009751 GO:0010583	response to cyclopentenone; response to salicylic acid stimulus; toxin catabolic process	GO:0004364	glutathione transferase activity	GO:0005737 GO:0005829	cytoplasm; cytosol
Glyma.04G097400	qESP-4-1	GO:0008150	biological process	GO:0003674	molecular function	GO:0005739	mitochondrion
Glyma.04G097500	qESP-4-1	GO:0006863 GO:0010184 GO:0015931	cytokinin transport; nucleobase-containing compound transport; purine nucleobase transport	GO:0005345 GO:0015211	purine nucleobase transmembrane transporter activity; purine nucleoside transmembrane transporter activity	GO:0005887 GO:0009507 GO:0016020	chloroplast; integral to plasma membrane; membrane
Glyma.04G097600	qESP-4-1	NA	NA	NA	NA	NA	NA
Glyma.04G097700	qESP-4-1	GO:0006855 GO:0009835 GO:0055085	drug transmembrane transport; fruit ripening; transmembrane transport	GO:0005215 GO:0015238 GO:0015297	antiporter activity; drug transmembrane transporter activity; transporter activity	GO:0005886 GO:0016020	membrane; plasma membrane
Glyma.04G097800	qESP-4-1	NA	NA	NA	NA	NA	NA
Glyma.04G097900	qESP-4-1	GO:0006855 GO:0009835 GO:0055085	drug transmembrane transport; fruit ripening; transmembrane transport	GO:0005215 GO:0015238 GO:0015297	antiporter activity; drug transmembrane transporter activity; transporter activity	GO:0005886 GO:0016020	membrane; plasma membrane
Glyma.04G098000	qESP-4-1	GO:0008150 GO:0010167 GO:0015706	biological process; nitrate transport; response to nitrate	GO:0005543	phospholipid binding	GO:0005739	mitochondrion
Glyma.04G098100	qESP-4-1	GO:0006826 GO:0010106 GO:0010167 GO:0010413 GO:0015706 GO:0045492	cellular response to iron ion starvation; glucuronoxylan metabolic process; iron ion transport; nitrate transport; response to nitrate; xylan biosynthetic process	GO:0008270	zinc ion binding	NA	NA
Glyma.04G098200	qESP-4-1	GO:0008150	biological process	GO:0003676 GO:0008270	nucleic acid binding; zinc ion binding	GO:0005575	cellular component
Glyma.04G098300	qESP-4-1	NA	NA	NA	NA	NA	NA
Glyma.04G098400	qESP-4-1	NA	NA	GO:0003677 GO:0003700	DNA binding; sequence-specific DNA binding transcription factor activity	GO:0005634	nucleus
Glyma.04G098500	qESP-4-1	NA	NA	NA	NA	GO:0005737 GO:0016020	cytoplasm; membrane
Glyma.04G098600	qESP-4-1	GO:0000398 GO:0008150	biological process; mRNA splicing, via spliceosome	GO:0000166 GO:0003676 GO:0003723	RNA binding; nucleic acid binding; nucleotide binding	GO:0005634 GO:0009507 GO:0009570	chloroplast; chloroplast stroma; nucleus
Glyma.04G098700	qESP-4-1	GO:0010413 GO:0045492	glucuronoxylan metabolic process; xylan biosynthetic process	GO:0005507 GO:0009055	copper ion binding; electron carrier activity	GO:0005886 GO:0031225	anchored to membrane; plasma membrane
Glyma.04G098800	qESP-4-1	NA	NA	NA	NA	GO:0005739 GO:0009506	mitochondrion; plasmodesma
Glyma.04G098900	qESP-4-1	GO:0000272 GO:0005975 GO:0005982 GO:0005983 GO:0009664 GO:0019252	carbohydrate metabolic process; plant-type cell wall organization; polysaccharide catabolic process; starch biosynthetic process; starch catabolic process; starch metabolic process	GO:0003824 GO:0004553 GO:0004556 GO:0019156 GO:0043169	alpha-amylase activity; catalytic activity; cation binding; hydrolase activity, hydrolyzing O-glycosyl compounds; isoamylase activity	GO:0009507 GO:0009569 GO:0009570	chloroplast; chloroplast starch grain; chloroplast stroma
Glyma.04G099000	qESP-4-1	NA	NA	NA	NA	NA	NA
Glyma.04G099100	qESP-4-1	GO:0008150	biological process	GO:0003674	molecular function	GO:0005739	mitochondrion
Glyma.04G099200	qESP-4-1	GO:0008150	biological process	GO:0003674	molecular function	GO:0005575	cellular component
Glyma.04G099300	qESP-4-1	GO:0008150	biological process	GO:0016757	transferase activity, transferring glycosyl groups	GO:0005794	Golgi apparatus
Glyma.04G099400	qESP-4-1	GO:0000096 GO:0006364 GO:0006399 GO:0006418 GO:0006434 GO:0007005 GO:0008652 GO:0009069 GO:0009658 GO:0009793 GO:0009902 GO:0009965 GO:0010027 GO:0010207 GO:0010228 GO:0016226 GO:0030154 GO:0034660 GO:0035304 GO:0042545 GO:0042793 GO:0043039 GO:0045893 GO:0048481	cell differentiation; cell wall modification; cellular amino acid biosynthetic process; chloroplast organization; chloroplast relocation; embryo development ending in seed dormancy; iron-sulfur cluster assembly; leaf morphogenesis; mitochondrion organization; ncRNA metabolic process; ovule development; photosystem II assembly; positive regulation of transcription, DNA-dependent; rRNA processing; …	GO:0000166 GO:0004812 GO:0004828 GO:0005524	ATP binding; aminoacyl-tRNA ligase activity; nucleotide binding; serine-tRNA ligase activity	GO:0005737 GO:0005739 GO:0009507	chloroplast; cytoplasm; mitochondrion
Glyma.04G099500	qESP-4-1	GO:0006833 GO:0006979 GO:0009651 GO:0009750 GO:0019344 GO:0019761 GO:0030003 GO:0055114 GO:0070838	cellular cation homeostasis; cysteine biosynthetic process; divalent metal ion transport; glucosinolate biosynthetic process; oxidation-reduction process; response to fructose stimulus; response to oxidative stress; response to salt stress; water transport	GO:0004601 GO:0020037	heme binding; peroxidase activity	GO:0005576	extracellular region
Glyma.04G099600	qESP-4-1	NA	NA	NA	NA	GO:0005634	nucleus
Glyma.04G099700	qESP-4-1	NA	NA	NA	NA	NA	NA
Glyma.04G099800	qESP-4-1	NA	NA	NA	NA	NA	NA
Glyma.04G099900	qESP-4-1	GO:0009742	brassinosteroid mediated signaling pathway	GO:0005515 GO:0019904 GO:0045309	protein binding; protein domain specific binding; protein phosphorylated amino acid binding	GO:0005634 GO:0005635 GO:0005737 GO:0005794 GO:0005829 GO:0005886	Golgi apparatus; cytoplasm; cytosol; nuclear envelope; nucleus; plasma membrane
Glyma.04G100000	qESP-4-1	NA	NA	GO:0016788	hydrolase activity, acting on ester bonds	GO:0005575	cellular component
Glyma.04G100100	qESP-4-1	GO:0006511 GO:0009737 GO:0010608 GO:0010629	negative regulation of gene expression; posttranscriptional regulation of gene expression; response to abscisic acid stimulus; ubiquitin-dependent protein catabolic process	GO:0004842 GO:0005515	protein binding; ubiquitin-protein ligase activity	GO:0005634	nucleus
Glyma.04G100200	qESP-4-1	GO:0008150 GO:0046685	biological process; response to arsenic-containing substance	GO:0003674	molecular function	GO:0005618 GO:0005794 GO:0005829 GO:0009505 GO:0009506 GO:0009507	Golgi apparatus; cell wall; chloroplast; cytosol; plant-type cell wall; plasmodesma
Glyma.04G100300	qESP-4-1	GO:0009741 GO:0016126	response to brassinosteroid stimulus; sterol biosynthetic process	GO:0003674	molecular function	GO:0005576 GO:0005618 GO:0005794 GO:0009505	Golgi apparatus; cell wall; extracellular region; plant-type cell wall
Glyma.04G100400	qESP-4-1	GO:0009741 GO:0016126	response to brassinosteroid stimulus; sterol biosynthetic process	GO:0003674	molecular function	GO:0005576 GO:0005618 GO:0005794 GO:0009505	Golgi apparatus; cell wall; extracellular region; plant-type cell wall
Glyma.04G100500	qESP-4-1	GO:0008152 GO:0015824	metabolic process; proline transport	GO:0015020 GO:0016757 GO:0016758	glucuronosyltransferase activity; transferase activity, transferring glycosyl groups; transferase activity, transferring hexosyl groups	GO:0005575	cellular component
Glyma.04G100600	qESP-4-1	GO:0008150	biological process	GO:0000166 GO:0003676 GO:0003723	RNA binding; nucleic acid binding; nucleotide binding	GO:0005634	nucleus
Glyma.04G100700	qESP-4-1	GO:0009735 GO:0010289 GO:0048364 GO:0048367	homogalacturonan biosynthetic process; response to cytokinin stimulus; root development; shoot system development	GO:0008168	methyltransferase activity	GO:0005768 GO:0005794 GO:0005802	Golgi apparatus; endosome; trans-Golgi network
Glyma.04G100800	qESP-4-1	NA	NA	NA	NA	NA	NA
Glyma.04G100900	qESP-4-1	GO:0006979 GO:0015824	proline transport; response to oxidative stress	NA	NA	GO:0009507	chloroplast
Glyma.04G101000	qESP-4-1	GO:0008150	biological process	NA	NA	GO:0005576 GO:0005773	extracellular region; vacuole
Glyma.04G101100	qESP-4-1	GO:0045454	cell redox homeostasis	NA	NA	GO:0005576	extracellular region
Glyma.04G101200	qESP-4-1	GO:0008150	biological process	GO:0003677 GO:0008327	DNA binding; methyl-CpG binding	GO:0005634	nucleus
Glyma.04G101300	qESP-4-1	GO:0045454	cell redox homeostasis	NA	NA	GO:0005576	extracellular region
Glyma.04G101400	qESP-4-1	GO:0002237 GO:0009627 GO:0031347	regulation of defense response; response to molecule of bacterial origin; systemic acquired resistance	GO:0003824 GO:0004722	catalytic activity; protein serine/threonine phosphatase activity	GO:0005634 GO:0005886	nucleus; plasma membrane
Glyma.04G101500	qESP-4-1	GO:0006281 GO:0007623 GO:0009414 GO:0009583 GO:0009637 GO:0009640 GO:0009785 GO:0010075 GO:0010118 GO:0010155 GO:0010343 GO:0010617 GO:0046283 GO:0046777 GO:0051510 GO:0055114	DNA repair; anthocyanin-containing compound metabolic process; blue light signaling pathway; circadian regulation of calcium ion oscillation; circadian rhythm; detection of light stimulus; oxidation-reduction process; photomorphogenesis; protein autophosphorylation; regulation of meristem growth; regulation of proton transport; regulation of unidimensional cell growth; response to blue light; res…	GO:0003913 GO:0004672 GO:0005515 GO:0005524 GO:0009882 GO:0042802 GO:0042803	ATP binding; DNA photolyase activity; blue light photoreceptor activity; identical protein binding; protein binding; protein homodimerization activity; protein kinase activity	GO:0005634 GO:0005737	cytoplasm; nucleus
Glyma.04G101600	qESP-4-1	NA	NA	NA	NA	NA	NA
Glyma.04G101700	qESP-4-1	NA	NA	NA	NA	NA	NA
Glyma.09G025000	qESP-9-1	NA	NA	GO:0003674	molecular function	GO:0005634 GO:0005829	cytosol; nucleus
Glyma.09G025100	qESP-9-1	GO:0006098 GO:0006573 GO:0006574 GO:0055114	oxidation-reduction process; pentose-phosphate shunt; valine catabolic process; valine metabolic process	GO:0000166 GO:0004616 GO:0008442 GO:0016491 GO:0016616 GO:0050662 GO:0051287	3-hydroxyisobutyrate dehydrogenase activity; NAD binding; coenzyme binding; nucleotide binding; oxidoreductase activity; oxidoreductase activity, acting on the CH-OH group of donors, NAD or NADP as acceptor; phosphogluconate dehydrogenase (decarboxylating) activity	GO:0005739	mitochondrion
Glyma.09G025200	qESP-9-1	GO:0008150 GO:0009610 GO:0009738 GO:0046482	abscisic acid mediated signaling pathway; biological process; para-aminobenzoic acid metabolic process; response to symbiotic fungus	GO:0003674	molecular function	GO:0005773 GO:0009507	chloroplast; vacuole
Glyma.09G025300	qESP-9-1	GO:0000398 GO:0006306 GO:0006342 GO:0006355 GO:0006396 GO:0007267 GO:0009616 GO:0009855 GO:0010014 GO:0010050 GO:0010073 GO:0010216 GO:0010267 GO:0016569 GO:0030422 GO:0031047 GO:0035196 GO:0043687 GO:0045893 GO:0051607	DNA methylation; RNA processing; cell-cell signaling; chromatin silencing; covalent chromatin modification; defense response to virus; determination of bilateral symmetry; gene silencing by RNA; mRNA splicing, via spliceosome; maintenance of DNA methylation; meristem initiation; meristem maintenance; positive regulation of transcription, DNA-dependent; post-translational protein modification; pro…	GO:0003676 GO:0003723 GO:0003725 GO:0004386 GO:0004525 GO:0005515 GO:0005524 GO:0008026 GO:0016891	ATP-dependent helicase activity; ATP binding; RNA binding; double-stranded RNA binding; endoribonuclease activity, producing 5'-phosphomonoesters; helicase activity; nucleic acid binding; protein binding; ribonuclease III activity	GO:0005622 GO:0005634	intracellular; nucleus
Glyma.09G025400	qESP-9-1	GO:0000398 GO:0006306 GO:0006342 GO:0006355 GO:0006396 GO:0007267 GO:0009616 GO:0009855 GO:0010014 GO:0010050 GO:0010073 GO:0010216 GO:0010267 GO:0016569 GO:0030422 GO:0031047 GO:0035196 GO:0043687 GO:0045893 GO:0051607	DNA methylation; RNA processing; cell-cell signaling; chromatin silencing; covalent chromatin modification; defense response to virus; determination of bilateral symmetry; gene silencing by RNA; mRNA splicing, via spliceosome; maintenance of DNA methylation; meristem initiation; meristem maintenance; positive regulation of transcription, DNA-dependent; post-translational protein modification; pro…	GO:0003676 GO:0003723 GO:0003725 GO:0004386 GO:0004525 GO:0005515 GO:0005524 GO:0008026 GO:0016891	ATP-dependent helicase activity; ATP binding; RNA binding; double-stranded RNA binding; endoribonuclease activity, producing 5'-phosphomonoesters; helicase activity; nucleic acid binding; protein binding; ribonuclease III activity	GO:0005622 GO:0005634	intracellular; nucleus
Glyma.09G025500	qESP-9-1	GO:0009556	microsporogenesis	NA	NA	GO:0005634	nucleus
Glyma.09G025600	qESP-9-1	GO:0000105 GO:0008152 GO:0008295 GO:0009411 GO:0009555 GO:0055114	histidine biosynthetic process; metabolic process; oxidation-reduction process; pollen development; response to UV; spermidine biosynthetic process	GO:0004399 GO:0008270 GO:0016491 GO:0051287	NAD binding; histidinol dehydrogenase activity; oxidoreductase activity; zinc ion binding	GO:0009507 GO:0009570	chloroplast; chloroplast stroma
Glyma.09G025700	qESP-9-1	GO:0000902 GO:0006623 GO:0006816 GO:0007030 GO:0007033 GO:0008150 GO:0009651 GO:0016049 GO:0048193	Golgi organization; Golgi vesicle transport; biological process; calcium ion transport; cell growth; cell morphogenesis; protein targeting to vacuole; response to salt stress; vacuole organization	GO:0003674	molecular function	GO:0005774 GO:0005783 GO:0005794 GO:0016020	Golgi apparatus; endoplasmic reticulum; membrane; vacuolar membrane
Glyma.09G025800	qESP-9-1	GO:0006355 GO:0010091	regulation of transcription, DNA-dependent; trichome branching	GO:0003677 GO:0003700 GO:0005515 GO:0043565	DNA binding; protein binding; sequence-specific DNA binding; sequence-specific DNA binding transcription factor activity	GO:0005634	nucleus
Glyma.09G025900	qESP-9-1	GO:0006355 GO:0010091	regulation of transcription, DNA-dependent; trichome branching	GO:0003677 GO:0003700 GO:0005515 GO:0043565	DNA binding; protein binding; sequence-specific DNA binding; sequence-specific DNA binding transcription factor activity	GO:0005634	nucleus
Glyma.09G026000	qESP-9-1	GO:0008150	biological process	GO:0030145 GO:0045735	manganese ion binding; nutrient reservoir activity	GO:0005576 GO:0048046	apoplast; extracellular region
Glyma.09G026100	qESP-9-1	GO:0006094 GO:0006184 GO:0007010 GO:0007017 GO:0007018 GO:0009409 GO:0009651 GO:0010498 GO:0010583 GO:0051258	GTP catabolic process; cytoskeleton organization; gluconeogenesis; microtubule-based movement; microtubule-based process; proteasomal protein catabolic process; protein polymerization; response to cold; response to cyclopentenone; response to salt stress	GO:0003924 GO:0005198 GO:0005200 GO:0005515 GO:0005525	GTP binding; GTPase activity; protein binding; structural constituent of cytoskeleton; structural molecule activity	GO:0005737 GO:0005794 GO:0005874 GO:0016020 GO:0043234 GO:0045298	Golgi apparatus; cytoplasm; membrane; microtubule; protein complex; tubulin complex
Glyma.09G026200	qESP-9-1	NA	NA	NA	NA	GO:0005634	nucleus
Glyma.09G026300	qESP-9-1	NA	NA	NA	NA	NA	NA
Glyma.09G026400	qESP-9-1	NA	NA	NA	NA	NA	NA
Glyma.09G026500	qESP-9-1	GO:0008150	biological process	GO:0003674	molecular function	GO:0005575	cellular component
Glyma.09G026600	qESP-9-1	GO:0008150	biological process	GO:0003674	molecular function	GO:0005634	nucleus
Glyma.09G026700	qESP-9-1	GO:0008150 GO:0009616 GO:0010050	biological process; vegetative phase change; virus induced gene silencing	GO:0016757	transferase activity, transferring glycosyl groups	GO:0005768 GO:0005794 GO:0005802 GO:0009507	Golgi apparatus; chloroplast; endosome; trans-Golgi network
Glyma.09G026800	qESP-9-1	GO:0000038 GO:0006633 GO:0006891 GO:0006944 GO:0043069 GO:0055114	cellular membrane fusion; fatty acid biosynthetic process; intra-Golgi vesicle-mediated transport; negative regulation of programmed cell death; oxidation-reduction process; very long-chain fatty acid metabolic process	GO:0003824 GO:0005506 GO:0016491 GO:0080132	catalytic activity; fatty acid alpha-hydroxylase activity; iron ion binding; oxidoreductase activity	NA	NA
Glyma.09G026900	qESP-9-1	GO:0055114	oxidation-reduction process	GO:0003824 GO:0008762 GO:0009055 GO:0016491 GO:0016614 GO:0050660	UDP-N-acetylmuramate dehydrogenase activity; catalytic activity; electron carrier activity; flavin adenine dinucleotide binding; oxidoreductase activity; oxidoreductase activity, acting on CH-OH group of donors	GO:0005737	cytoplasm
Glyma.09G027000	qESP-9-1	GO:0055114	oxidation-reduction process	GO:0003824 GO:0008762 GO:0009055 GO:0016491 GO:0016614 GO:0050660	UDP-N-acetylmuramate dehydrogenase activity; catalytic activity; electron carrier activity; flavin adenine dinucleotide binding; oxidoreductase activity; oxidoreductase activity, acting on CH-OH group of donors	GO:0005886 GO:0009507 GO:0048046	apoplast; chloroplast; plasma membrane
Glyma.09G027100	qESP-9-1	GO:0055114	oxidation-reduction process	GO:0003824 GO:0008762 GO:0009055 GO:0016491 GO:0016614 GO:0050660	UDP-N-acetylmuramate dehydrogenase activity; catalytic activity; electron carrier activity; flavin adenine dinucleotide binding; oxidoreductase activity; oxidoreductase activity, acting on CH-OH group of donors	GO:0005886 GO:0009507 GO:0048046	apoplast; chloroplast; plasma membrane
Glyma.09G027200	qESP-9-1	GO:0055114	oxidation-reduction process	GO:0003824 GO:0008762 GO:0009055 GO:0016491 GO:0016614 GO:0050660	UDP-N-acetylmuramate dehydrogenase activity; catalytic activity; electron carrier activity; flavin adenine dinucleotide binding; oxidoreductase activity; oxidoreductase activity, acting on CH-OH group of donors	GO:0005886 GO:0009507 GO:0048046	apoplast; chloroplast; plasma membrane
Glyma.09G027300	qESP-9-1	GO:0055114	oxidation-reduction process	GO:0003824 GO:0008762 GO:0009055 GO:0016491 GO:0016614 GO:0050660	UDP-N-acetylmuramate dehydrogenase activity; catalytic activity; electron carrier activity; flavin adenine dinucleotide binding; oxidoreductase activity; oxidoreductase activity, acting on CH-OH group of donors	GO:0005886 GO:0009507 GO:0048046	apoplast; chloroplast; plasma membrane
Glyma.09G027400	qESP-9-1	GO:0015812	gamma-aminobutyric acid transport	GO:0015185	gamma-aminobutyric acid transmembrane transporter activity	GO:0005886	plasma membrane
Glyma.09G027500	qESP-9-1	GO:0006468	protein phosphorylation	GO:0004672 GO:0004674 GO:0005509 GO:0005524 GO:0016301 GO:0016772	ATP binding; calcium ion binding; kinase activity; protein kinase activity; protein serine/threonine kinase activity; transferase activity, transferring phosphorus-containing groups	GO:0005576 GO:0016021	extracellular region; integral to membrane
Glyma.09G027600	qESP-9-1	GO:0006468	protein phosphorylation	GO:0004672 GO:0004674 GO:0005509 GO:0005524 GO:0016301 GO:0016772	ATP binding; calcium ion binding; kinase activity; protein kinase activity; protein serine/threonine kinase activity; transferase activity, transferring phosphorus-containing groups	GO:0005576 GO:0016021	extracellular region; integral to membrane
Glyma.09G027700	qESP-9-1	GO:0006468 GO:0009620	protein phosphorylation; response to fungus	GO:0004672 GO:0004674 GO:0004713 GO:0005524 GO:0016301 GO:0016772	ATP binding; kinase activity; protein kinase activity; protein serine/threonine kinase activity; protein tyrosine kinase activity; transferase activity, transferring phosphorus-containing groups	GO:0005618 GO:0016021	cell wall; integral to membrane
Glyma.09G027800	qESP-9-1	GO:0006468	protein phosphorylation	GO:0004672 GO:0004674 GO:0005524 GO:0016301 GO:0016772	ATP binding; kinase activity; protein kinase activity; protein serine/threonine kinase activity; transferase activity, transferring phosphorus-containing groups	GO:0005618 GO:0016021	cell wall; integral to membrane
Glyma.09G027900	qESP-9-1	GO:0006468	protein phosphorylation	GO:0004672 GO:0004674 GO:0005509 GO:0005524 GO:0016301 GO:0016772	ATP binding; calcium ion binding; kinase activity; protein kinase activity; protein serine/threonine kinase activity; transferase activity, transferring phosphorus-containing groups	GO:0005576 GO:0016021	extracellular region; integral to membrane
Glyma.09G028000	qESP-9-1	GO:0000394 GO:0005975 GO:0009086	RNA splicing, via endonucleolytic cleavage and ligation; carbohydrate metabolic process; methionine biosynthetic process	GO:0004553	hydrolase activity, hydrolyzing O-glycosyl compounds	GO:0005576 GO:0005773 GO:0009505 GO:0048046	apoplast; extracellular region; plant-type cell wall; vacuole
Glyma.09G028100	qESP-9-1	GO:0006865 GO:0009407 GO:0010583 GO:0055114	amino acid transport; oxidation-reduction process; response to cyclopentenone; toxin catabolic process	GO:0003824 GO:0008762 GO:0009055 GO:0016491 GO:0016614 GO:0050660	UDP-N-acetylmuramate dehydrogenase activity; catalytic activity; electron carrier activity; flavin adenine dinucleotide binding; oxidoreductase activity; oxidoreductase activity, acting on CH-OH group of donors	GO:0009507	chloroplast
Glyma.09G028200	qESP-9-1	GO:0006865 GO:0009407 GO:0010583 GO:0055114	amino acid transport; oxidation-reduction process; response to cyclopentenone; toxin catabolic process	GO:0003824 GO:0008762 GO:0009055 GO:0016491 GO:0016614 GO:0050660	UDP-N-acetylmuramate dehydrogenase activity; catalytic activity; electron carrier activity; flavin adenine dinucleotide binding; oxidoreductase activity; oxidoreductase activity, acting on CH-OH group of donors	GO:0009507	chloroplast
Glyma.09G028300	qESP-9-1	GO:0006865 GO:0009407 GO:0010583 GO:0055114	amino acid transport; oxidation-reduction process; response to cyclopentenone; toxin catabolic process	GO:0003824 GO:0008762 GO:0009055 GO:0016491 GO:0016614 GO:0050660	UDP-N-acetylmuramate dehydrogenase activity; catalytic activity; electron carrier activity; flavin adenine dinucleotide binding; oxidoreductase activity; oxidoreductase activity, acting on CH-OH group of donors	GO:0009507	chloroplast
Glyma.09G028400	qESP-9-1	GO:0006810 GO:0016126 GO:0052541 GO:0052546	cell wall pectin metabolic process; plant-type cell wall cellulose metabolic process; sterol biosynthetic process; transport	GO:0005215	transporter activity	GO:0005622 GO:0005634 GO:0005829 GO:0005886 GO:0016021	cytosol; integral to membrane; intracellular; nucleus; plasma membrane
Glyma.09G028500	qESP-9-1	NA	NA	NA	NA	NA	NA
Glyma.09G028600	qESP-9-1	GO:0006260	DNA replication	GO:0003896 GO:0004003	ATP-dependent DNA helicase activity; DNA primase activity	GO:0005739	mitochondrion
Glyma.09G028700	qESP-9-1	GO:0008150	biological process	GO:0003674	molecular function	GO:0005886	plasma membrane
Glyma.09G028800	qESP-9-1	GO:0006260	DNA replication	GO:0003896 GO:0004003	ATP-dependent DNA helicase activity; DNA primase activity	GO:0005739	mitochondrion
Glyma.09G028900	qESP-9-1	GO:0006511 GO:0007275 GO:0016567	multicellular organismal development; protein ubiquitination; ubiquitin-dependent protein catabolic process	GO:0004842 GO:0008270	ubiquitin-protein ligase activity; zinc ion binding	GO:0005622 GO:0005634 GO:0005737	cytoplasm; intracellular; nucleus
Glyma.09G029000	qESP-9-1	GO:0006354 GO:0006412	DNA-dependent transcription, elongation; translation	GO:0003735	structural constituent of ribosome	GO:0005622 GO:0005739 GO:0005840 GO:0015934	intracellular; large ribosomal subunit; mitochondrion; ribosome
Glyma.09G029100	qESP-9-1	GO:0006810 GO:0007623 GO:0009409 GO:0009414 GO:0009737	circadian rhythm; response to abscisic acid stimulus; response to cold; response to water deprivation; transport	GO:0005215	transporter activity	GO:0009507 GO:0016020	chloroplast; membrane
Glyma.09G029200	qESP-9-1	GO:0010207 GO:0045454	cell redox homeostasis; photosystem II assembly	NA	NA	GO:0009507 GO:0009536	chloroplast; plastid
Glyma.09G029300	qESP-9-1	GO:0000911 GO:0006334 GO:0009651 GO:0009723 GO:0009733 GO:0009737 GO:0009739 GO:0009751 GO:0009753 GO:0010413 GO:0045492 GO:0046686	cytokinesis by cell plate formation; glucuronoxylan metabolic process; nucleosome assembly; response to abscisic acid stimulus; response to auxin stimulus; response to cadmium ion; response to ethylene stimulus; response to gibberellin stimulus; response to jasmonic acid stimulus; response to salicylic acid stimulus; response to salt stress; xylan biosynthetic process	GO:0003677 GO:0003691 GO:0003700 GO:0005515 GO:0042803	DNA binding; double-stranded telomeric DNA binding; protein binding; protein homodimerization activity; sequence-specific DNA binding transcription factor activity	GO:0000786 GO:0005634	nucleosome; nucleus
Glyma.09G029400	qESP-9-1	GO:0009686 GO:0055114	gibberellin biosynthetic process; oxidation-reduction process	GO:0004497 GO:0005506 GO:0009055 GO:0016705 GO:0019825 GO:0020037 GO:0051777	electron carrier activity; ent-kaurenoate oxidase activity; heme binding; iron ion binding; monooxygenase activity; oxidoreductase activity, acting on paired donors, with incorporation or reduction of molecular oxygen; oxygen binding	GO:0005783	endoplasmic reticulum
Glyma.09G029500	qESP-9-1	GO:0000373 GO:0017004	Group II intron splicing; cytochrome complex assembly	GO:0003723	RNA binding	GO:0005739	mitochondrion
Glyma.09G029600	qESP-9-1	GO:0009408 GO:0009409 GO:0009414 GO:0009651	response to cold; response to heat; response to salt stress; response to water deprivation	GO:0005509 GO:0005544	calcium-dependent phospholipid binding; calcium ion binding	GO:0005634	nucleus
Glyma.09G029700	qESP-9-1	GO:0008152 GO:0019252	metabolic process; starch biosynthetic process	GO:0000166 GO:0016491	nucleotide binding; oxidoreductase activity	GO:0009507	chloroplast
Glyma.09G029800	qESP-9-1	GO:0006355 GO:0010413 GO:0045492	glucuronoxylan metabolic process; regulation of transcription, DNA-dependent; xylan biosynthetic process	GO:0003700 GO:0043565	sequence-specific DNA binding; sequence-specific DNA binding transcription factor activity	GO:0005634	nucleus
Glyma.09G029900	qESP-9-1	GO:0006083 GO:0006097 GO:0008152 GO:0019605	acetate metabolic process; butyrate metabolic process; glyoxylate cycle; metabolic process	GO:0003824 GO:0003987 GO:0016208 GO:0047760	AMP binding; acetate-CoA ligase activity; butyrate-CoA ligase activity; catalytic activity	GO:0005739 GO:0005777	mitochondrion; peroxisome
Glyma.09G030000	qESP-9-1	GO:0000278 GO:0000910 GO:0006995 GO:0008284 GO:0008356 GO:0009409 GO:0009555 GO:0009793 GO:0010048 GO:0010440 GO:0040020 GO:0042023 GO:0045736 GO:0048229	DNA endoreduplication; asymmetric cell division; cellular response to nitrogen starvation; cytokinesis; embryo development ending in seed dormancy; gametophyte development; mitotic cell cycle; negative regulation of cyclin-dependent protein serine/threonine kinase activity; pollen development; positive regulation of cell proliferation; regulation of meiosis; response to cold; stomatal lineage pro…	GO:0004672 GO:0004674 GO:0004693 GO:0005515 GO:0005524 GO:0016301 GO:0016772	ATP binding; cyclin-dependent protein serine/threonine kinase activity; kinase activity; protein binding; protein kinase activity; protein serine/threonine kinase activity; transferase activity, transferring phosphorus-containing groups	GO:0005634 GO:0005737 GO:0005829 GO:0005886 GO:0009574 GO:0010005	cortical microtubule, transverse to long axis; cytoplasm; cytosol; nucleus; plasma membrane; preprophase band
Glyma.09G030100	qESP-9-1	GO:0009220 GO:0009640 GO:0010388	cullin deneddylation; photomorphogenesis; pyrimidine ribonucleotide biosynthetic process	NA	NA	GO:0005634	nucleus
Glyma.09G030200	qESP-9-1	NA	NA	NA	NA	NA	NA
Glyma.09G030300	qESP-9-1	GO:0006012 GO:0009225 GO:0009723 GO:0009738 GO:0009832 GO:0019567 GO:0035556 GO:0044237 GO:0052542	abscisic acid mediated signaling pathway; arabinose biosynthetic process; cellular metabolic process; defense response by callose deposition; galactose metabolic process; intracellular signal transduction; nucleotide-sugar metabolic process; plant-type cell wall biogenesis; response to ethylene stimulus	GO:0000166 GO:0003824 GO:0003978 GO:0050373 GO:0050662	UDP-arabinose 4-epimerase activity; UDP-glucose 4-epimerase activity; catalytic activity; coenzyme binding; nucleotide binding	GO:0005794	Golgi apparatus
Glyma.09G030400	qESP-9-1	GO:0006890	retrograde vesicle-mediated transport, Golgi to ER	GO:0005198 GO:0008565	protein transporter activity; structural molecule activity	GO:0005774 GO:0030126	COPI vesicle coat; vacuolar membrane
Glyma.09G030500	qESP-9-1	GO:0006015 GO:0006098 GO:0009052 GO:0016556 GO:0019253 GO:0019303 GO:0019658	5-phosphoribose 1-diphosphate biosynthetic process; D-ribose catabolic process; glucose catabolic process to lactate and acetate; mRNA modification; pentose-phosphate shunt; pentose-phosphate shunt, non-oxidative branch; reductive pentose-phosphate cycle	GO:0004751	ribose-5-phosphate isomerase activity	GO:0009507	chloroplast
Glyma.09G030600	qESP-9-1	GO:0002679 GO:0010200 GO:0016567 GO:0035556 GO:0050832	defense response to fungus; intracellular signal transduction; protein ubiquitination; respiratory burst involved in defense response; response to chitin	GO:0004842	ubiquitin-protein ligase activity	GO:0005737	cytoplasm
Glyma.09G030700	qESP-9-1	NA	NA	NA	NA	NA	NA
Glyma.09G030800	qESP-9-1	NA	NA	NA	NA	NA	NA
Glyma.09G030900	qESP-9-1	GO:0006499 GO:0006886 GO:0007264 GO:0015031	N-terminal protein myristoylation; intracellular protein transport; protein transport; small GTPase mediated signal transduction	GO:0005525 GO:0016004	GTP binding; phospholipase activator activity	GO:0005622 GO:0005773 GO:0005794 GO:0009506	Golgi apparatus; intracellular; plasmodesma; vacuole
Glyma.09G031000	qESP-9-1	GO:0006810 GO:0006839 GO:0055085	mitochondrial transport; transmembrane transport; transport	NA	NA	GO:0005739 GO:0005743	mitochondrial inner membrane; mitochondrion
Glyma.09G031100	qESP-9-1	GO:0006635 GO:0016558	fatty acid beta-oxidation; protein import into peroxisome matrix	GO:0003676 GO:0004386 GO:0005524 GO:0008026	ATP-dependent helicase activity; ATP binding; helicase activity; nucleic acid binding	GO:0005634 GO:0005773	nucleus; vacuole
Glyma.09G031200	qESP-9-1	GO:0008150	biological process	GO:0003674	molecular function	GO:0005634	nucleus
Glyma.09G031300	qESP-9-1	GO:0000373 GO:0017004	Group II intron splicing; cytochrome complex assembly	GO:0003723	RNA binding	GO:0005739	mitochondrion
Glyma.09G031400	qESP-9-1	GO:0006820 GO:0006826 GO:0010106 GO:0010167 GO:0015706 GO:0052541 GO:0052546	anion transport; cell wall pectin metabolic process; cellular response to iron ion starvation; iron ion transport; nitrate transport; plant-type cell wall cellulose metabolic process; response to nitrate	GO:0005452 GO:0015301	anion:anion antiporter activity; inorganic anion exchanger activity	GO:0016020 GO:0016021	integral to membrane; membrane
Glyma.09G031500	qESP-9-1	NA	NA	NA	NA	GO:0005739	mitochondrion
Glyma.09G031600	qESP-9-1	GO:0005975	carbohydrate metabolic process	GO:0004650	polygalacturonase activity	GO:0005576	extracellular region
Glyma.09G031700	qESP-9-1	GO:0006470	protein dephosphorylation	GO:0003824 GO:0004722	catalytic activity; protein serine/threonine phosphatase activity	GO:0008287	protein serine/threonine phosphatase complex
Glyma.09G031800	qESP-9-1	GO:0006098 GO:0006364 GO:0009773 GO:0009902 GO:0010027 GO:0015995 GO:0019288 GO:0034660	chlorophyll biosynthetic process; chloroplast relocation; isopentenyl diphosphate biosynthetic process, mevalonate-independent pathway; ncRNA metabolic process; pentose-phosphate shunt; photosynthetic electron transport in photosystem I; rRNA processing; thylakoid membrane organization	GO:0003723	RNA binding	GO:0005739 GO:0009507 GO:0009570 GO:0009579 GO:0016020	chloroplast; chloroplast stroma; membrane; mitochondrion; thylakoid
Glyma.09G031900	qESP-9-1	GO:0000956 GO:0009793	embryo development ending in seed dormancy; nuclear-transcribed mRNA catabolic process	GO:0003676 GO:0008270	nucleic acid binding; zinc ion binding	GO:0005634	nucleus
Glyma.09G032000	qESP-9-1	GO:0006464 GO:0016567 GO:0042787	cellular protein modification process; protein ubiquitination; protein ubiquitination involved in ubiquitin-dependent protein catabolic process	GO:0004842 GO:0016881	acid-amino acid ligase activity; ubiquitin-protein ligase activity	GO:0000151 GO:0005622 GO:0005634	intracellular; nucleus; ubiquitin ligase complex
Glyma.09G032100	qESP-9-1	GO:0006355 GO:0009651 GO:0009737	regulation of transcription, DNA-dependent; response to abscisic acid stimulus; response to salt stress	GO:0003677 GO:0003700	DNA binding; sequence-specific DNA binding transcription factor activity	GO:0005634	nucleus
Glyma.09G032200	qESP-9-1	GO:0045487 GO:0055114	gibberellin catabolic process; oxidation-reduction process	GO:0005506 GO:0016491 GO:0016706 GO:0052634	C-19 gibberellin 2-beta-dioxygenase activity; iron ion binding; oxidoreductase activity; oxidoreductase activity, acting on paired donors, with incorporation or reduction of molecular oxygen, 2-oxoglutarate as one donor, and incorporation of one atom each of oxygen into both donors	GO:0005737 GO:0016020	cytoplasm; membrane
Glyma.09G032300	qESP-9-1	GO:0006457 GO:0008150 GO:0009408 GO:0009644 GO:0034976 GO:0042542	biological process; protein folding; response to endoplasmic reticulum stress; response to heat; response to high light intensity; response to hydrogen peroxide	GO:0003674	molecular function	GO:0005634 GO:0009507 GO:0009535 GO:0009536 GO:0009941	chloroplast; chloroplast envelope; chloroplast thylakoid membrane; nucleus; plastid
Glyma.09G032400	qESP-9-1	NA	NA	NA	NA	NA	NA
Glyma.09G032500	qESP-9-1	GO:0008150 GO:0009688	abscisic acid biosynthetic process; biological process	GO:0003723	RNA binding	GO:0005634	nucleus
Glyma.09G032600	qESP-9-1	GO:0008150	biological process	GO:0003674	molecular function	GO:0005634	nucleus
Glyma.09G032700	qESP-9-1	NA	NA	NA	NA	NA	NA
Glyma.09G032800	qESP-9-1	GO:0006457	protein folding	GO:0031072 GO:0051082	heat shock protein binding; unfolded protein binding	GO:0005737	cytoplasm
Glyma.09G032900	qESP-9-1	GO:0008150	biological process	GO:0003674	molecular function	GO:0005576	extracellular region
Glyma.09G033000	qESP-9-1	GO:0008150	biological process	GO:0003674	molecular function	GO:0005576	extracellular region
Glyma.09G033100	qESP-9-1	GO:0008150	biological process	GO:0003674	molecular function	GO:0005576	extracellular region
Glyma.09G033200	qESP-9-1	GO:0008150	biological process	GO:0003674	molecular function	GO:0005576	extracellular region
Glyma.09G033300	qESP-9-1	NA	NA	NA	NA	NA	NA
Glyma.09G033400	qESP-9-1	GO:0008150 GO:0030244 GO:0048193	Golgi vesicle transport; biological process; cellulose biosynthetic process	GO:0003674	molecular function	NA	NA
Glyma.09G033500	qESP-9-1	GO:0008150	biological process	GO:0003674	molecular function	GO:0005739	mitochondrion
Glyma.09G033600	qESP-9-1	NA	NA	NA	NA	NA	NA
Glyma.09G033700	qESP-9-1	NA	NA	GO:0004857 GO:0030599 GO:0046910	enzyme inhibitor activity; pectinesterase activity; pectinesterase inhibitor activity	GO:0005576	extracellular region
Glyma.09G033800	qESP-9-1	GO:0008150 GO:0009741	biological process; response to brassinosteroid stimulus	GO:0003674	molecular function	GO:0005634	nucleus
Glyma.09G033900	qESP-9-1	GO:0006139	nucleobase-containing compound metabolic process	GO:0003676 GO:0008408	3'-5' exonuclease activity; nucleic acid binding	GO:0005622 GO:0005634	intracellular; nucleus
Glyma.09G034000	qESP-9-1	GO:0008150	biological process	GO:0003674	molecular function	GO:0005634	nucleus
Glyma.09G034100	qESP-9-1	NA	NA	NA	NA	NA	NA
Glyma.09G034200	qESP-9-1	GO:0000956 GO:0008150	biological process; nuclear-transcribed mRNA catabolic process	GO:0003674	molecular function	GO:0005737 GO:0005834 GO:0080008	CUL4-RING ubiquitin ligase complex; cytoplasm; heterotrimeric G-protein complex
Glyma.09G034300	qESP-9-1	GO:0006355 GO:0009624 GO:0009733	regulation of transcription, DNA-dependent; response to auxin stimulus; response to nematode	GO:0003700 GO:0043565	sequence-specific DNA binding; sequence-specific DNA binding transcription factor activity	GO:0005634	nucleus
Glyma.09G034400	qESP-9-1	GO:0006457	protein folding	GO:0051082	unfolded protein binding	GO:0005829 GO:0016272	cytosol; prefoldin complex
Glyma.09G034500	qESP-9-1	NA	NA	GO:0003700 GO:0005515	protein binding; sequence-specific DNA binding transcription factor activity	GO:0005634	nucleus
Glyma.09G034600	qESP-9-1	GO:0008150	biological process	GO:0003674	molecular function	GO:0005634	nucleus
Glyma.09G034700	qESP-9-1	NA	NA	NA	NA	NA	NA
Glyma.09G034800	qESP-9-1	GO:0006470	protein dephosphorylation	GO:0003824 GO:0004722	catalytic activity; protein serine/threonine phosphatase activity	GO:0008287	protein serine/threonine phosphatase complex
Glyma.09G034900	qESP-9-1	GO:0006629	lipid metabolic process	GO:0004091 GO:0016788	carboxylesterase activity; hydrolase activity, acting on ester bonds	GO:0005576	extracellular region
Glyma.09G035000	qESP-9-1	GO:0006629	lipid metabolic process	GO:0004091 GO:0016788	carboxylesterase activity; hydrolase activity, acting on ester bonds	GO:0005576	extracellular region
Glyma.09G035100	qESP-9-1	GO:0030048 GO:0042545	actin filament-based movement; cell wall modification	GO:0030599	pectinesterase activity	GO:0005618 GO:0009505	cell wall; plant-type cell wall
Glyma.09G035200	qESP-9-1	NA	NA	NA	NA	NA	NA
Glyma.09G035300	qESP-9-1	GO:0008150	biological process	GO:0003674	molecular function	GO:0005634 GO:0005829	cytosol; nucleus
Glyma.09G035400	qESP-9-1	GO:0006355 GO:0006468 GO:0007165	protein phosphorylation; regulation of transcription, DNA-dependent; signal transduction	GO:0004672 GO:0004674 GO:0004712 GO:0004713 GO:0004871 GO:0005524 GO:0016301 GO:0016772	ATP binding; kinase activity; protein kinase activity; protein serine/threonine/tyrosine kinase activity; protein serine/threonine kinase activity; protein tyrosine kinase activity; signal transducer activity; transferase activity, transferring phosphorus-containing groups	GO:0005634	nucleus
Glyma.09G035500	qESP-9-1	GO:0006325 GO:0006355 GO:0007623 GO:0009409 GO:0009630 GO:0009638 GO:0009640 GO:0009649 GO:0009687 GO:0009867 GO:0010017 GO:0010029 GO:0010148 GO:0010155 GO:0010161 GO:0010202 GO:0010218 GO:0010374 GO:0010617 GO:0015979 GO:0031347 GO:0046685 GO:0046777	abscisic acid metabolic process; chromatin organization; circadian regulation of calcium ion oscillation; circadian rhythm; entrainment of circadian clock; gravitropism; jasmonic acid mediated signaling pathway; photomorphogenesis; photosynthesis; phototropism; protein autophosphorylation; red light signaling pathway; red or far-red light signaling pathway; regulation of defense response; regulat…	GO:0004673 GO:0004871 GO:0005515 GO:0008020 GO:0009883 GO:0031516 GO:0031517 GO:0042802	G-protein coupled photoreceptor activity; far-red light photoreceptor activity; identical protein binding; protein binding; protein histidine kinase activity; red light photoreceptor activity; red or far-red light photoreceptor activity; signal transducer activity	GO:0005634 GO:0005829 GO:0005886 GO:0016604	cytosol; nuclear body; nucleus; plasma membrane
Glyma.09G035600	qESP-9-1	GO:0006085 GO:0008152 GO:0044262	acetyl-CoA biosynthetic process; cellular carbohydrate metabolic process; metabolic process	GO:0000166 GO:0003824 GO:0003878 GO:0004775 GO:0046912	ATP citrate synthase activity; catalytic activity; nucleotide binding; succinate-CoA ligase (ADP-forming) activity; transferase activity, transferring acyl groups, acyl groups converted into alkyl on transfer	GO:0005737 GO:0005829 GO:0009346 GO:0016020	citrate lyase complex; cytoplasm; cytosol; membrane
Glyma.09G035700	qESP-9-1	NA	NA	NA	NA	NA	NA
Glyma.09G035800	qESP-9-1	GO:0006397 GO:0008150 GO:0008284 GO:0009630	biological process; gravitropism; mRNA processing; positive regulation of cell proliferation	GO:0003723 GO:0005515	RNA binding; protein binding	GO:0005634	nucleus
Glyma.09G035900	qESP-9-1	GO:0008152	metabolic process	GO:0008080	N-acetyltransferase activity	GO:0005575	cellular component
Glyma.09G036000	qESP-9-1	GO:0000394 GO:0008152 GO:0009086 GO:0055114	RNA splicing, via endonucleolytic cleavage and ligation; metabolic process; methionine biosynthetic process; oxidation-reduction process	GO:0004028 GO:0016491	3-chloroallyl aldehyde dehydrogenase activity; oxidoreductase activity	GO:0005737 GO:0005783	cytoplasm; endoplasmic reticulum
Glyma.09G036100	qESP-9-1	GO:0002238 GO:0006623 GO:0009409	protein targeting to vacuole; response to cold; response to molecule of fungal origin	GO:0003674	molecular function	GO:0005737 GO:0005886	cytoplasm; plasma membrane
Glyma.09G036200	qESP-9-1	NA	NA	GO:0004857 GO:0030599 GO:0046910	enzyme inhibitor activity; pectinesterase activity; pectinesterase inhibitor activity	GO:0005634	nucleus
Glyma.09G036300	qESP-9-1	GO:0006301 GO:0006511 GO:0006635 GO:0009407 GO:0016036 GO:0019375 GO:0042631 GO:0043161 GO:0045892 GO:0051788 GO:0080129	cellular response to phosphate starvation; cellular response to water deprivation; fatty acid beta-oxidation; galactolipid biosynthetic process; negative regulation of transcription, DNA-dependent; postreplication repair; proteasomal ubiquitin-dependent protein catabolic process; proteasome core complex assembly; response to misfolded protein; toxin catabolic process; ubiquitin-dependent protein …	GO:0004842 GO:0016881	acid-amino acid ligase activity; ubiquitin-protein ligase activity	GO:0005634 GO:0005783 GO:0016020 GO:0048471	endoplasmic reticulum; membrane; nucleus; perinuclear region of cytoplasm
Glyma.09G036400	qESP-9-1	GO:0009555 GO:0009860 GO:0010233 GO:0030418	nicotianamine biosynthetic process; phloem transport; pollen development; pollen tube growth	GO:0030410	nicotianamine synthase activity	GO:0005634	nucleus
Glyma.09G036500	qESP-9-1	GO:0009062 GO:0009651 GO:0009686 GO:0009723 GO:0009737 GO:0009739 GO:0009740 GO:0009793 GO:0009845 GO:0009863 GO:0009867 GO:0009938 GO:0010029 GO:0010162 GO:0010187 GO:0010325 GO:0042538 GO:0048444 GO:0048608 GO:2000033 GO:2000377	embryo development ending in seed dormancy; fatty acid catabolic process; floral organ morphogenesis; gibberellic acid mediated signaling pathway; gibberellin biosynthetic process; hyperosmotic salinity response; jasmonic acid mediated signaling pathway; negative regulation of gibberellic acid mediated signaling pathway; negative regulation of seed germination; raffinose family oligosaccharide bi…	GO:0003700 GO:0005515	protein binding; sequence-specific DNA binding transcription factor activity	GO:0005634	nucleus
Glyma.09G036600	qESP-9-1	NA	NA	NA	NA	NA	NA
Glyma.09G036700	qESP-9-1	NA	NA	NA	NA	NA	NA
Glyma.09G036800	qESP-9-1	NA	NA	NA	NA	NA	NA
Glyma.09G036900	qESP-9-1	NA	NA	NA	NA	NA	NA
Glyma.09G037000	qESP-9-1	NA	NA	NA	NA	NA	NA
Glyma.09G037100	qESP-9-1	GO:0002215 GO:0009651 GO:0009817	defense response to fungus, incompatible interaction; defense response to nematode; response to salt stress	GO:0003824 GO:0004553 GO:0043169	catalytic activity; cation binding; hydrolase activity, hydrolyzing O-glycosyl compounds	GO:0005618 GO:0005774	cell wall; vacuolar membrane
Glyma.09G037200	qESP-9-1	GO:0002215 GO:0009651 GO:0009817	defense response to fungus, incompatible interaction; defense response to nematode; response to salt stress	GO:0003824 GO:0004553 GO:0043169	catalytic activity; cation binding; hydrolase activity, hydrolyzing O-glycosyl compounds	GO:0005618 GO:0005774	cell wall; vacuolar membrane
Glyma.09G037300	qESP-9-1	GO:0008150	biological process	GO:0000166	nucleotide binding	GO:0005634 GO:0080008	CUL4-RING ubiquitin ligase complex; nucleus
Glyma.09G037400	qESP-9-1	GO:0006351	transcription, DNA-dependent	GO:0003676 GO:0003677 GO:0003899 GO:0008270	DNA-directed RNA polymerase activity; DNA binding; nucleic acid binding; zinc ion binding	GO:0000419 GO:0005634 GO:0005665	DNA-directed RNA polymerase II, core complex; DNA-directed RNA polymerase V complex; nucleus
Glyma.09G037500	qESP-9-1	NA	NA	NA	NA	NA	NA
Glyma.09G037600	qESP-9-1	NA	NA	NA	NA	NA	NA
Glyma.09G037700	qESP-9-1	NA	NA	NA	NA	NA	NA
Glyma.09G037800	qESP-9-1	GO:0015031	protein transport	GO:0015171 GO:0015450	P-P-bond-hydrolysis-driven protein transmembrane transporter activity; amino acid transmembrane transporter activity	GO:0005744 GO:0009527 GO:0031359	integral to chloroplast outer membrane; mitochondrial inner membrane presequence translocase complex; plastid outer membrane
Glyma.09G037900	qESP-9-1	GO:0008150 GO:0009630 GO:0009639	biological process; gravitropism; response to red or far red light	NA	NA	GO:0005737	cytoplasm
Glyma.09G038000	qESP-9-1	GO:0042744 GO:0045454 GO:0055114	cell redox homeostasis; hydrogen peroxide catabolic process; oxidation-reduction process	GO:0004148 GO:0009055 GO:0016491 GO:0016668 GO:0050660	dihydrolipoyl dehydrogenase activity; electron carrier activity; flavin adenine dinucleotide binding; oxidoreductase activity; oxidoreductase activity, acting on a sulfur group of donors, NAD(P) as acceptor	GO:0005737 GO:0005739 GO:0009507 GO:0009570 GO:0009941	chloroplast; chloroplast envelope; chloroplast stroma; cytoplasm; mitochondrion
Glyma.09G038100	qESP-9-1	GO:0006412 GO:0042254	ribosome biogenesis; translation	GO:0003735	structural constituent of ribosome	GO:0005622 GO:0005737 GO:0005840 GO:0022625	cytoplasm; cytosolic large ribosomal subunit; intracellular; ribosome
Glyma.09G038200	qESP-9-1	GO:0000902 GO:0006096 GO:0006511 GO:0006623 GO:0006833 GO:0006886 GO:0006972 GO:0007030 GO:0007033 GO:0009266 GO:0009651 GO:0009853 GO:0016049 GO:0046686 GO:0048193 GO:0051788 GO:0080129	Golgi organization; Golgi vesicle transport; cell growth; cell morphogenesis; glycolysis; hyperosmotic response; intracellular protein transport; photorespiration; proteasome core complex assembly; protein targeting to vacuole; response to cadmium ion; response to misfolded protein; response to salt stress; response to temperature stimulus; ubiquitin-dependent protein catabolic process; vacuole o…	GO:0005525	GTP binding	GO:0005622 GO:0005886	intracellular; plasma membrane
Glyma.09G038300	qESP-9-1	GO:0006355	regulation of transcription, DNA-dependent	GO:0003677 GO:0005516	DNA binding; calmodulin binding	GO:0005634	nucleus
Glyma.09G038400	qESP-9-1	NA	NA	NA	NA	NA	NA
Glyma.09G038500	qESP-9-1	GO:0005975 GO:0009809 GO:0010228 GO:0010413 GO:0016926 GO:0016998 GO:0045492 GO:0050665	carbohydrate metabolic process; cell wall macromolecule catabolic process; glucuronoxylan metabolic process; hydrogen peroxide biosynthetic process; lignin biosynthetic process; protein desumoylation; vegetative to reproductive phase transition of meristem; xylan biosynthetic process	GO:0004568	chitinase activity	GO:0005576 GO:0005886	extracellular region; plasma membrane
Glyma.09G038600	qESP-9-1	GO:0005975 GO:0010214	carbohydrate metabolic process; seed coat development	GO:0004553 GO:0046556	alpha-N-arabinofuranosidase activity; hydrolase activity, hydrolyzing O-glycosyl compounds	GO:0005576 GO:0009505 GO:0048046	apoplast; extracellular region; plant-type cell wall
Glyma.09G038700	qESP-9-1	GO:0007623 GO:0008150	biological process; circadian rhythm	GO:0003674	molecular function	GO:0005634	nucleus
Glyma.09G038800	qESP-9-1	GO:0008150	biological process	GO:0003674	molecular function	GO:0009507	chloroplast
Glyma.09G038900	qESP-9-1	GO:0006355 GO:0051555	flavonol biosynthetic process; regulation of transcription, DNA-dependent	GO:0003677 GO:0003700	DNA binding; sequence-specific DNA binding transcription factor activity	GO:0005634	nucleus
Glyma.09G039000	qESP-9-1	GO:0008150	biological process	GO:0003674	molecular function	GO:0005634 GO:0005739	mitochondrion; nucleus
Glyma.09G039100	qESP-9-1	NA	NA	NA	NA	NA	NA
Glyma.09G039200	qESP-9-1	GO:0006355 GO:0009739 GO:0010026 GO:0010091	regulation of transcription, DNA-dependent; response to gibberellin stimulus; trichome branching; trichome differentiation	GO:0003676 GO:0003700 GO:0008270	nucleic acid binding; sequence-specific DNA binding transcription factor activity; zinc ion binding	GO:0005622 GO:0005634	intracellular; nucleus
Glyma.09G039300	qESP-9-1	GO:0009639	response to red or far red light	GO:0008270	zinc ion binding	GO:0005634	nucleus
Glyma.09G039400	qESP-9-1	NA	NA	NA	NA	NA	NA
Glyma.09G039500	qESP-9-1	GO:0008150	biological process	GO:0003674	molecular function	GO:0005575	cellular component
Glyma.09G039600	qESP-9-1	GO:0006606 GO:0006886 GO:0009407	intracellular protein transport; protein import into nucleus; toxin catabolic process	GO:0008565	protein transporter activity	GO:0005634 GO:0005730 GO:0005737 GO:0005829 GO:0009506	cytoplasm; cytosol; nucleolus; nucleus; plasmodesma
Glyma.09G039700	qESP-9-1	NA	NA	NA	NA	NA	NA
Glyma.09G039800	qESP-9-1	NA	NA	NA	NA	NA	NA
Glyma.09G039900	qESP-9-1	GO:0008150	biological process	GO:0003674	molecular function	GO:0005768 GO:0005794 GO:0005802 GO:0005886 GO:0009506 GO:0031225 GO:0046658	Golgi apparatus; anchored to membrane; anchored to plasma membrane; endosome; plasma membrane; plasmodesma; trans-Golgi network
Glyma.09G040000	qESP-9-1	GO:0007623 GO:0009723 GO:0009735 GO:0009736 GO:0009873 GO:0010029 GO:0010082 GO:0010119 GO:0010150 GO:0031537 GO:0048364 GO:0048831 GO:0071368 GO:0080113	cellular response to cytokinin stimulus; circadian rhythm; cytokinin mediated signaling pathway; ethylene mediated signaling pathway; leaf senescence; regulation of anthocyanin metabolic process; regulation of root meristem growth; regulation of seed germination; regulation of seed growth; regulation of shoot system development; regulation of stomatal movement; response to cytokinin stimulus; res…	GO:0000156 GO:0003700 GO:0005515	phosphorelay response regulator activity; protein binding; sequence-specific DNA binding transcription factor activity	GO:0005634	nucleus
Glyma.09G040100	qESP-9-1	GO:0022900 GO:0022904	electron transport chain; respiratory electron transport chain	GO:0004129 GO:0005507 GO:0009055 GO:0016491 GO:0020037	copper ion binding; cytochrome-c oxidase activity; electron carrier activity; heme binding; oxidoreductase activity	GO:0005739 GO:0005751 GO:0009507 GO:0016020 GO:0016021	chloroplast; integral to membrane; membrane; mitochondrial respiratory chain complex IV; mitochondrion
Glyma.09G040200	qESP-9-1	GO:0009414 GO:0009785 GO:0010161	blue light signaling pathway; red light signaling pathway; response to water deprivation	NA	NA	GO:0005634	nucleus
Glyma.09G040300	qESP-9-1	GO:0008150	biological process	GO:0003674	molecular function	GO:0005634	nucleus
Glyma.09G040400	qESP-9-1	NA	NA	NA	NA	NA	NA
Glyma.09G040500	qESP-9-1	NA	NA	NA	NA	NA	NA
Glyma.09G040600	qESP-9-1	NA	NA	NA	NA	NA	NA
Glyma.09G040700	qESP-9-1	GO:0006261 GO:0006312 GO:0008150 GO:0009560	DNA-dependent DNA replication; biological process; embryo sac egg cell differentiation; mitotic recombination	GO:0003674	molecular function	GO:0005737	cytoplasm
Glyma.09G040800	qESP-9-1	GO:0006952 GO:0016556	defense response; mRNA modification	NA	NA	GO:0009507 GO:0016020	chloroplast; membrane
Glyma.09G040900	qESP-9-1	GO:0006952 GO:0016556	defense response; mRNA modification	NA	NA	GO:0009507 GO:0016020	chloroplast; membrane
Glyma.09G041000	qESP-9-1	GO:0005975 GO:0006816 GO:0007030 GO:0009637 GO:0009651 GO:0010155 GO:0046777 GO:0048767	Golgi organization; calcium ion transport; carbohydrate metabolic process; protein autophosphorylation; regulation of proton transport; response to blue light; response to salt stress; root hair elongation	GO:0004650	polygalacturonase activity	GO:0005576 GO:0005773 GO:0009505	extracellular region; plant-type cell wall; vacuole
Glyma.09G041100	qESP-9-1	GO:0006457	protein folding	GO:0031072 GO:0051082	heat shock protein binding; unfolded protein binding	GO:0005575	cellular component
Glyma.09G041200	qESP-9-1	GO:0006629 GO:0016042	lipid catabolic process; lipid metabolic process	GO:0004091 GO:0004806	carboxylesterase activity; triglyceride lipase activity	GO:0005886	plasma membrane
Glyma.09G041300	qESP-9-1	GO:0006952 GO:0007165 GO:0009416 GO:0010114 GO:0042742	defense response; defense response to bacterium; response to light stimulus; response to red light; signal transduction	GO:0043531	ADP binding	GO:0005622 GO:0005737	cytoplasm; intracellular
Glyma.09G041400	qESP-9-1	GO:0000165 GO:0006612 GO:0007154 GO:0008152 GO:0009409 GO:0009738 GO:0009862 GO:0009867 GO:0010363 GO:0016036 GO:0019375 GO:0030968 GO:0031348 GO:0042631 GO:0043069 GO:0048193 GO:0048364 GO:0048527 GO:0050832	Golgi vesicle transport; MAPK cascade; abscisic acid mediated signaling pathway; cell communication; cellular response to phosphate starvation; cellular response to water deprivation; defense response to fungus; endoplasmic reticulum unfolded protein response; galactolipid biosynthetic process; jasmonic acid mediated signaling pathway; lateral root development; metabolic process; negative regulat…	GO:0003824 GO:0004630 GO:0005543	catalytic activity; phospholipase D activity; phospholipid binding	GO:0005737	cytoplasm
Glyma.09G041500	qESP-9-1	GO:0006355 GO:0008219 GO:0009723 GO:0009735 GO:0009753 GO:0009873 GO:0010286 GO:0045893 GO:0051707	cell death; ethylene mediated signaling pathway; heat acclimation; positive regulation of transcription, DNA-dependent; regulation of transcription, DNA-dependent; response to cytokinin stimulus; response to ethylene stimulus; response to jasmonic acid stimulus; response to other organism	GO:0003677 GO:0003700 GO:0005515	DNA binding; protein binding; sequence-specific DNA binding transcription factor activity	GO:0005634 GO:0005737 GO:0005886	cytoplasm; nucleus; plasma membrane
Glyma.09G041600	qESP-9-1	GO:0005975	carbohydrate metabolic process	GO:0004650	polygalacturonase activity	GO:0005576	extracellular region
Glyma.09G041700	qESP-9-1	NA	NA	NA	NA	NA	NA
Glyma.09G041800	qESP-9-1	NA	NA	NA	NA	NA	NA
Glyma.09G041900	qESP-9-1	NA	NA	NA	NA	NA	NA
Glyma.09G042000	qESP-9-1	GO:0008152 GO:0009610 GO:0048767 GO:0055114	metabolic process; oxidation-reduction process; response to symbiotic fungus; root hair elongation	GO:0003995 GO:0016491 GO:0016627 GO:0016772 GO:0050660	acyl-CoA dehydrogenase activity; flavin adenine dinucleotide binding; oxidoreductase activity; oxidoreductase activity, acting on the CH-CH group of donors; transferase activity, transferring phosphorus-containing groups	NA	NA
Glyma.09G042100	qESP-9-1	GO:0042545	cell wall modification	GO:0004857 GO:0030599	enzyme inhibitor activity; pectinesterase activity	GO:0005618 GO:0009505	cell wall; plant-type cell wall
Glyma.09G042200	qESP-9-1	GO:0042545	cell wall modification	GO:0004857 GO:0030599	enzyme inhibitor activity; pectinesterase activity	GO:0005618 GO:0005634 GO:0009505	cell wall; nucleus; plant-type cell wall
Glyma.09G042300	qESP-9-1	GO:0045739 GO:2001022	positive regulation of DNA repair; positive regulation of response to DNA damage stimulus	NA	NA	GO:0000793 GO:0005634 GO:0005730	condensed chromosome; nucleolus; nucleus
Glyma.09G042400	qESP-9-1	GO:0000165 GO:0002679 GO:0006612 GO:0006952 GO:0009595 GO:0009611 GO:0009612 GO:0009697 GO:0009814 GO:0009862 GO:0009867 GO:0010200 GO:0010310 GO:0010363 GO:0031348 GO:0035556 GO:0042742 GO:0043900 GO:0050832	MAPK cascade; defense response; defense response, incompatible interaction; defense response to bacterium; defense response to fungus; detection of biotic stimulus; intracellular signal transduction; jasmonic acid mediated signaling pathway; negative regulation of defense response; protein targeting to membrane; regulation of hydrogen peroxide metabolic process; regulation of multi-organism proce…	GO:0008270	zinc ion binding	GO:0005634	nucleus
Glyma.09G042500	qESP-9-1	GO:0008150	biological process	GO:0003674	molecular function	GO:0009507	chloroplast
Glyma.09G042600	qESP-9-1	GO:0048235	pollen sperm cell differentiation	GO:0003674	molecular function	GO:0005887	integral to plasma membrane
Glyma.09G042700	qESP-9-1	GO:0006855 GO:0055085	drug transmembrane transport; transmembrane transport	GO:0005215 GO:0015238 GO:0015297	antiporter activity; drug transmembrane transporter activity; transporter activity	GO:0005886 GO:0016020	membrane; plasma membrane
Glyma.09G042800	qESP-9-1	NA	NA	GO:0003824	catalytic activity	GO:0005739	mitochondrion
Glyma.09G042900	qESP-9-1	GO:0008150	biological process	GO:0003674	molecular function	GO:0005634	nucleus
Glyma.09G043000	qESP-9-1	GO:0000394 GO:0007017 GO:0009086	RNA splicing, via endonucleolytic cleavage and ligation; methionine biosynthetic process; microtubule-based process	GO:0003777	microtubule motor activity	GO:0005737 GO:0005875	cytoplasm; microtubule associated complex
Glyma.09G043100	qESP-9-1	GO:0000394 GO:0007017 GO:0009086	RNA splicing, via endonucleolytic cleavage and ligation; methionine biosynthetic process; microtubule-based process	GO:0003777	microtubule motor activity	GO:0005737 GO:0005875	cytoplasm; microtubule associated complex
Glyma.09G043200	qESP-9-1	GO:0006833 GO:0009651 GO:0009750	response to fructose stimulus; response to salt stress; water transport	GO:0051119	sugar transmembrane transporter activity	GO:0005886 GO:0005887 GO:0009705 GO:0016020	integral to plasma membrane; membrane; plant-type vacuole membrane; plasma membrane
Glyma.09G043300	qESP-9-1	GO:0008150	biological process	GO:0003674	molecular function	GO:0005634	nucleus
Glyma.09G043400	qESP-9-1	GO:0009414 GO:0009737 GO:0009790	embryo development; response to abscisic acid stimulus; response to water deprivation	GO:0003674	molecular function	GO:0009507	chloroplast
Glyma.09G043500	qESP-9-1	GO:0008150	biological process	GO:0003674	molecular function	GO:0005576	extracellular region
Glyma.09G043600	qESP-9-1	GO:0008150	biological process	GO:0003674	molecular function	GO:0005739	mitochondrion
Glyma.09G043700	qESP-9-1	GO:0000038 GO:0006633 GO:0008152 GO:0008610 GO:0009409 GO:0042335	cuticle development; fatty acid biosynthetic process; lipid biosynthetic process; metabolic process; response to cold; very long-chain fatty acid metabolic process	GO:0003824 GO:0016746 GO:0016747	catalytic activity; transferase activity, transferring acyl groups; transferase activity, transferring acyl groups other than amino-acyl groups	GO:0009507 GO:0016020	chloroplast; membrane
Glyma.09G043800	qESP-9-1	GO:0000278 GO:0006355 GO:0006396 GO:0006508 GO:0007062 GO:0009640 GO:0009749 GO:0009755 GO:0009793 GO:0009845 GO:0009870 GO:0009880 GO:0009909 GO:0009933 GO:0010072 GO:0010154 GO:0010162 GO:0010182 GO:0010204 GO:0010228 GO:0010431 GO:0010564 GO:0016567 GO:0019915 GO:0042742 GO:0043687 GO:0045595 GO:0045892 GO:0045893 GO:0048364 GO:0048366 GO:0048825 GO:0050826 GO:0050832 GO:0051301	RNA processing; cell division; cotyledon development; defense response signaling pathway, resistance gene-dependent; defense response signaling pathway, resistance gene-independent; defense response to bacterium; defense response to fungus; embryo development ending in seed dormancy; embryonic pattern specification; fruit development; hormone-mediated signaling pathway; leaf development; lipid st…	GO:0000166 GO:0005515	nucleotide binding; protein binding	GO:0005634 GO:0080008	CUL4-RING ubiquitin ligase complex; nucleus
Glyma.09G043900	qESP-9-1	NA	NA	GO:0000166	nucleotide binding	GO:0009507	chloroplast
Glyma.09G044000	qESP-9-1	GO:0006457	protein folding	GO:0005515 GO:0031072 GO:0051082	heat shock protein binding; protein binding; unfolded protein binding	GO:0005634	nucleus
Glyma.09G044100	qESP-9-1	GO:0007067 GO:0030261	chromosome condensation; mitosis	NA	NA	GO:0005634	nucleus
Glyma.09G044200	qESP-9-1	GO:0001558 GO:0007067 GO:0007346 GO:0008283 GO:0009734 GO:0009790 GO:0009791 GO:0009819 GO:0009860 GO:0010252 GO:0031117 GO:0040014 GO:0042742 GO:0046686 GO:0048364 GO:0048527 GO:0048768 GO:0090333	auxin homeostasis; auxin mediated signaling pathway; cell proliferation; defense response to bacterium; drought recovery; embryo development; lateral root development; mitosis; pollen tube growth; positive regulation of microtubule depolymerization; post-embryonic development; regulation of cell growth; regulation of mitotic cell cycle; regulation of multicellular organism growth; regulation of s…	GO:0008017	microtubule binding	GO:0005634 GO:0005737 GO:0005774 GO:0005794 GO:0005829 GO:0005886 GO:0009506 GO:0009507 GO:0009579 GO:0048046 GO:0090406	Golgi apparatus; apoplast; chloroplast; cytoplasm; cytosol; nucleus; plasma membrane; plasmodesma; pollen tube; thylakoid; vacuolar membrane
Glyma.09G044300	qESP-9-1	GO:0000278 GO:0003002 GO:0007155 GO:0009887 GO:0009888 GO:0010014 GO:0010090 GO:0010228 GO:0010638 GO:0016049 GO:0016926 GO:0033043 GO:0033044 GO:0045010 GO:0045595 GO:0048449 GO:0048589 GO:0048765 GO:0050665 GO:0071555	actin nucleation; cell adhesion; cell growth; cell wall organization; developmental growth; floral organ formation; hydrogen peroxide biosynthetic process; meristem initiation; mitotic cell cycle; organ morphogenesis; positive regulation of organelle organization; protein desumoylation; regionalization; regulation of cell differentiation; regulation of chromosome organization; regulation of organ…	GO:0003777 GO:0005524	ATP binding; microtubule motor activity	GO:0005737 GO:0005795 GO:0005874 GO:0005886	Golgi stack; cytoplasm; microtubule; plasma membrane
Glyma.09G044400	qESP-9-1	GO:0006406 GO:0006508 GO:0009909 GO:0009911 GO:0010074 GO:0010413 GO:0016926 GO:0045492	glucuronoxylan metabolic process; mRNA export from nucleus; maintenance of meristem identity; positive regulation of flower development; protein desumoylation; proteolysis; regulation of flower development; xylan biosynthetic process	GO:0008234 GO:0016929	SUMO-specific protease activity; cysteine-type peptidase activity	GO:0005634	nucleus
Glyma.09G044500	qESP-9-1	GO:0006810 GO:0006855 GO:0009414 GO:0009611 GO:0009624 GO:0009627 GO:0010118 GO:0034976 GO:0055085	drug transmembrane transport; response to endoplasmic reticulum stress; response to nematode; response to water deprivation; response to wounding; stomatal movement; systemic acquired resistance; transmembrane transport; transport	GO:0000166 GO:0005524 GO:0008517 GO:0016887 GO:0017111 GO:0042626	ATP binding; ATPase activity; ATPase activity, coupled to transmembrane movement of substances; folic acid transporter activity; nucleoside-triphosphatase activity; nucleotide binding	GO:0000325 GO:0005773 GO:0005774 GO:0005794 GO:0005886 GO:0009506 GO:0016021	Golgi apparatus; integral to membrane; plant-type vacuole; plasma membrane; plasmodesma; vacuolar membrane; vacuole
Glyma.09G044600	qESP-9-1	GO:0000226 GO:0000911 GO:0008150 GO:0010583 GO:0051225	biological process; cytokinesis by cell plate formation; microtubule cytoskeleton organization; response to cyclopentenone; spindle assembly	NA	NA	GO:0005737	cytoplasm
Glyma.09G044700	qESP-9-1	GO:0009220 GO:0009909 GO:0010228 GO:0016458 GO:0019919 GO:0034968 GO:0034970 GO:0034971 GO:0034972	gene silencing; histone H3-R17 methylation; histone H3-R26 methylation; histone H3-R2 methylation; histone lysine methylation; peptidyl-arginine methylation, to asymmetrical-dimethyl arginine; pyrimidine ribonucleotide biosynthetic process; regulation of flower development; vegetative to reproductive phase transition of meristem	GO:0008168 GO:0008469 GO:0016277 GO:0035241 GO:0035242 GO:0042803 GO:0046982	[myelin basic protein]-arginine N-methyltransferase activity; histone-arginine N-methyltransferase activity; methyltransferase activity; protein-arginine omega-N asymmetric methyltransferase activity; protein-arginine omega-N monomethyltransferase activity; protein heterodimerization activity; protein homodimerization activity	GO:0005634 GO:0005737	cytoplasm; nucleus
Glyma.09G044800	qESP-9-1	GO:0000271 GO:0009825 GO:0009932 GO:0009969 GO:0010411 GO:0010817 GO:0019761 GO:0043481 GO:0048767 GO:0071555	anthocyanin accumulation in tissues in response to UV light; cell tip growth; cell wall organization; glucosinolate biosynthetic process; multidimensional cell growth; polysaccharide biosynthetic process; regulation of hormone levels; root hair elongation; xyloglucan biosynthetic process; xyloglucan metabolic process	GO:0005515 GO:0016740 GO:0016757 GO:0033843 GO:0035252	UDP-xylosyltransferase activity; protein binding; transferase activity; transferase activity, transferring glycosyl groups; xyloglucan 6-xylosyltransferase activity	GO:0005768 GO:0005794 GO:0005802 GO:0016021	Golgi apparatus; endosome; integral to membrane; trans-Golgi network
Glyma.09G044900	qESP-9-1	GO:0006778 GO:0006970 GO:0009651 GO:0009737	porphyrin-containing compound metabolic process; response to abscisic acid stimulus; response to osmotic stress; response to salt stress	GO:0020037	heme binding	GO:0005739 GO:0005783 GO:0005794 GO:0005795 GO:0016020 GO:0016021	Golgi apparatus; Golgi stack; endoplasmic reticulum; integral to membrane; membrane; mitochondrion
Glyma.09G045000	qESP-9-1	GO:0000447 GO:0000461 GO:0006412 GO:0006414 GO:0009664 GO:0016925 GO:0042254 GO:0042274 GO:0042545	cell wall modification; endonucleolytic cleavage in ITS1 to separate SSU-rRNA from 5.8S rRNA and LSU-rRNA from tricistronic rRNA transcript (SSU-rRNA, 5.8S rRNA, LSU-rRNA); endonucleolytic cleavage to generate mature 3'-end of SSU-rRNA from (SSU-rRNA, 5.8S rRNA, LSU-rRNA); plant-type cell wall organization; protein sumoylation; ribosomal small subunit biogenesis; ribosome biogenesis; translation;…	GO:0003735	structural constituent of ribosome	GO:0005622 GO:0005737 GO:0005840 GO:0022627	cytoplasm; cytosolic small ribosomal subunit; intracellular; ribosome
Glyma.09G045100	qESP-9-1	NA	NA	GO:0003824 GO:0004722	catalytic activity; protein serine/threonine phosphatase activity	GO:0005634	nucleus
Glyma.09G045200	qESP-9-1	GO:0030001	metal ion transport	GO:0046872	metal ion binding	GO:0005634	nucleus
Glyma.09G045300	qESP-9-1	GO:0008150	biological process	NA	NA	GO:0005634	nucleus
Glyma.09G045400	qESP-9-1	GO:0006810 GO:0016192 GO:0048573	photoperiodism, flowering; transport; vesicle-mediated transport	GO:0003674	molecular function	GO:0005886 GO:0016021	integral to membrane; plasma membrane
Glyma.09G045500	qESP-9-1	GO:0009739 GO:0009911 GO:0010228	positive regulation of flower development; response to gibberellin stimulus; vegetative to reproductive phase transition of meristem	GO:0003674	molecular function	GO:0005634	nucleus
Glyma.09G045600	qESP-9-1	GO:0009739 GO:0009911 GO:0010228	positive regulation of flower development; response to gibberellin stimulus; vegetative to reproductive phase transition of meristem	GO:0003674	molecular function	GO:0005634	nucleus
Glyma.09G045700	qESP-9-1	GO:0006612 GO:0006623 GO:0006820 GO:0006862 GO:0006888 GO:0006944 GO:0009611 GO:0009612 GO:0009646 GO:0010200 GO:0010363 GO:0015696 GO:0015802 GO:0043069 GO:0043090 GO:0043269	ER to Golgi vesicle-mediated transport; amino acid import; ammonium transport; anion transport; basic amino acid transport; cellular membrane fusion; negative regulation of programmed cell death; nucleotide transport; protein targeting to membrane; protein targeting to vacuole; regulation of ion transport; regulation of plant-type hypersensitive response; response to absence of light; response to…	GO:0005515	protein binding	GO:0000326 GO:0005783 GO:0005886	endoplasmic reticulum; plasma membrane; protein storage vacuole
Glyma.09G045800	qESP-9-1	GO:0006810 GO:0006839 GO:0030974	mitochondrial transport; thiamine pyrophosphate transport; transport	GO:0090422	thiamine pyrophosphate transporter activity	GO:0005739 GO:0005743	mitochondrial inner membrane; mitochondrion
Glyma.09G045900	qESP-9-1	GO:0006499	N-terminal protein myristoylation	GO:0003674	molecular function	GO:0005739	mitochondrion
Glyma.09G046000	qESP-9-1	GO:0008150	biological process	GO:0003674	molecular function	GO:0009507 GO:0016020	chloroplast; membrane
Glyma.09G046100	qESP-9-1	NA	NA	NA	NA	NA	NA
Glyma.09G046200	qESP-9-1	GO:0006355	regulation of transcription, DNA-dependent	GO:0003677 GO:0003700 GO:0043565	DNA binding; sequence-specific DNA binding; sequence-specific DNA binding transcription factor activity	GO:0005622 GO:0005634	intracellular; nucleus
Glyma.09G046300	qESP-9-1	GO:0008150	biological process	GO:0008270	zinc ion binding	GO:0005634 GO:0009506	nucleus; plasmodesma
Glyma.09G046400	qESP-9-1	GO:0008152 GO:0055114	metabolic process; oxidation-reduction process	GO:0016491 GO:0016706	oxidoreductase activity; oxidoreductase activity, acting on paired donors, with incorporation or reduction of molecular oxygen, 2-oxoglutarate as one donor, and incorporation of one atom each of oxygen into both donors	GO:0005737	cytoplasm
Glyma.09G046500	qESP-9-1	GO:0000278 GO:0006396 GO:0006486 GO:0006499 GO:0006511 GO:0006888 GO:0007062 GO:0009733 GO:0009753 GO:0009790 GO:0009793 GO:0009867 GO:0009880 GO:0010072 GO:0010087 GO:0010162 GO:0010265 GO:0010431 GO:0010564 GO:0042752 GO:0043090 GO:0045595 GO:0048316 GO:0048366 GO:0048825 GO:0051301	ER to Golgi vesicle-mediated transport; N-terminal protein myristoylation; RNA processing; SCF complex assembly; amino acid import; cell division; cotyledon development; embryo development; embryo development ending in seed dormancy; embryonic pattern specification; jasmonic acid mediated signaling pathway; leaf development; mitotic cell cycle; phloem or xylem histogenesis; primary shoot apical m…	GO:0005515 GO:0031625	protein binding; ubiquitin protein ligase binding	GO:0000151 GO:0000794 GO:0005634 GO:0005737 GO:0005819 GO:0005829 GO:0009524	condensed nuclear chromosome; cytoplasm; cytosol; nucleus; phragmoplast; spindle; ubiquitin ligase complex
Glyma.09G046600	qESP-9-1	NA	NA	NA	NA	NA	NA
Glyma.09G046700	qESP-9-1	NA	NA	NA	NA	NA	NA
Glyma.09G046800	qESP-9-1	GO:0042149 GO:0046777	cellular response to glucose starvation; protein autophosphorylation	GO:0004674 GO:0005515 GO:0030295	protein binding; protein kinase activator activity; protein serine/threonine kinase activity	GO:0005634	nucleus
Glyma.09G046900	qESP-9-1	GO:0008150	biological process	GO:0003674	molecular function	GO:0005634	nucleus
Glyma.09G047000	qESP-9-1	GO:0008150	biological process	GO:0003674	molecular function	GO:0009507 GO:0016020	chloroplast; membrane
Glyma.09G047100	qESP-9-1	GO:0000398 GO:0009560 GO:0010030 GO:0045893	embryo sac egg cell differentiation; mRNA splicing, via spliceosome; positive regulation of seed germination; positive regulation of transcription, DNA-dependent	GO:0003677	DNA binding	GO:0005634	nucleus
Glyma.09G047200	qESP-9-1	GO:0006499 GO:0006816 GO:0006970 GO:0007030 GO:0009409 GO:0009414 GO:0009651 GO:0010350 GO:0018008 GO:0031115 GO:0031117 GO:0035865 GO:0042742 GO:0043622 GO:0046686 GO:0048767 GO:0051511 GO:0051592 GO:0071219 GO:0071280 GO:0071281 GO:0071286 GO:0071325 GO:0071472 GO:0072709 GO:0075733	Golgi organization; N-terminal peptidyl-glycine N-myristoylation; N-terminal protein myristoylation; calcium ion transport; cellular response to copper ion; cellular response to iron ion; cellular response to magnesium ion; cellular response to magnesium starvation; cellular response to mannitol stimulus; cellular response to molecule of bacterial origin; cellular response to potassium ion; cellu…	GO:0005507 GO:0005509 GO:0005515 GO:0005516 GO:0005546 GO:0005547 GO:0008017 GO:0043325 GO:0080025	calcium ion binding; calmodulin binding; copper ion binding; microtubule binding; phosphatidylinositol-3,4,5-trisphosphate binding; phosphatidylinositol-3,4-bisphosphate binding; phosphatidylinositol-3,5-bisphosphate binding; phosphatidylinositol-4,5-bisphosphate binding; protein binding	GO:0005773 GO:0005881 GO:0005886 GO:0009506 GO:0009507 GO:0046658	anchored to plasma membrane; chloroplast; cytoplasmic microtubule; plasma membrane; plasmodesma; vacuole
Glyma.09G047300	qESP-9-1	GO:0006260 GO:0006268 GO:0006270 GO:0008283	DNA replication; DNA replication initiation; DNA unwinding involved in replication; cell proliferation	GO:0003677 GO:0005515 GO:0005524 GO:0008094	ATP binding; DNA-dependent ATPase activity; DNA binding; protein binding	GO:0000790 GO:0005634	nuclear chromatin; nucleus
Glyma.09G047400	qESP-9-1	GO:0006863 GO:0015931	nucleobase-containing compound transport; purine nucleobase transport	GO:0005345	purine nucleobase transmembrane transporter activity	GO:0016020	membrane
Glyma.09G047500	qESP-9-1	GO:0006863 GO:0015931	nucleobase-containing compound transport; purine nucleobase transport	GO:0005345	purine nucleobase transmembrane transporter activity	GO:0016020	membrane
Glyma.09G047600	qESP-9-1	GO:0006863 GO:0015931	nucleobase-containing compound transport; purine nucleobase transport	GO:0005345	purine nucleobase transmembrane transporter activity	GO:0016020	membrane
Glyma.09G047700	qESP-9-1	GO:0008150	biological process	GO:0003674	molecular function	GO:0005634	nucleus
Glyma.09G047800	qESP-9-1	GO:0008150 GO:0048767	biological process; root hair elongation	GO:0003674	molecular function	GO:0005634	nucleus
Glyma.09G047900	qESP-9-1	GO:0042546	cell wall biogenesis	NA	NA	GO:0005737 GO:0005773	cytoplasm; vacuole
Glyma.09G048000	qESP-9-1	NA	NA	NA	NA	NA	NA
Glyma.09G048100	qESP-9-1	GO:0007155 GO:0009651 GO:0009825	cell adhesion; multidimensional cell growth; response to salt stress	GO:0030247	polysaccharide binding	GO:0005886 GO:0009897 GO:0031225 GO:0046658	anchored to membrane; anchored to plasma membrane; external side of plasma membrane; plasma membrane
Glyma.09G048200	qESP-9-1	NA	NA	GO:0008270	zinc ion binding	NA	NA
Glyma.09G048300	qESP-9-1	GO:0006468 GO:0007169 GO:0008544 GO:0009790	embryo development; epidermis development; protein phosphorylation; transmembrane receptor protein tyrosine kinase signaling pathway	GO:0004672 GO:0004674 GO:0005524 GO:0016772	ATP binding; protein kinase activity; protein serine/threonine kinase activity; transferase activity, transferring phosphorus-containing groups	NA	NA
Glyma.09G048400	qESP-9-1	GO:0006979 GO:0010054 GO:0055114	oxidation-reduction process; response to oxidative stress; trichoblast differentiation	GO:0004601 GO:0020037	heme binding; peroxidase activity	GO:0005576	extracellular region
Glyma.09G048500	qESP-9-1	NA	NA	NA	NA	NA	NA
Glyma.09G048600	qESP-9-1	GO:0008150	biological process	GO:0003674	molecular function	GO:0005737 GO:0080008	CUL4-RING ubiquitin ligase complex; cytoplasm
Glyma.09G048700	qESP-9-1	GO:0055114	oxidation-reduction process	GO:0005506 GO:0009055 GO:0016705 GO:0019825 GO:0020037	electron carrier activity; heme binding; iron ion binding; oxidoreductase activity, acting on paired donors, with incorporation or reduction of molecular oxygen; oxygen binding	NA	NA
Glyma.09G048800	qESP-9-1	GO:0055114	oxidation-reduction process	GO:0005506 GO:0009055 GO:0016705 GO:0019825 GO:0020037	electron carrier activity; heme binding; iron ion binding; oxidoreductase activity, acting on paired donors, with incorporation or reduction of molecular oxygen; oxygen binding	NA	NA
Glyma.09G048900	qESP-9-1	GO:0055114	oxidation-reduction process	GO:0005506 GO:0009055 GO:0016705 GO:0019825 GO:0020037	electron carrier activity; heme binding; iron ion binding; oxidoreductase activity, acting on paired donors, with incorporation or reduction of molecular oxygen; oxygen binding	NA	NA
Glyma.09G049000	qESP-9-1	GO:0006468 GO:0007169	protein phosphorylation; transmembrane receptor protein tyrosine kinase signaling pathway	GO:0004672 GO:0004674 GO:0005524 GO:0016301 GO:0016772	ATP binding; kinase activity; protein kinase activity; protein serine/threonine kinase activity; transferase activity, transferring phosphorus-containing groups	GO:0005886	plasma membrane
Glyma.09G049100	qESP-9-1	GO:0055114	oxidation-reduction process	GO:0005506 GO:0009055 GO:0016705 GO:0019825 GO:0020037	electron carrier activity; heme binding; iron ion binding; oxidoreductase activity, acting on paired donors, with incorporation or reduction of molecular oxygen; oxygen binding	NA	NA
Glyma.09G049200	qESP-9-1	GO:0055114	oxidation-reduction process	GO:0005506 GO:0009055 GO:0016705 GO:0019825 GO:0020037	electron carrier activity; heme binding; iron ion binding; oxidoreductase activity, acting on paired donors, with incorporation or reduction of molecular oxygen; oxygen binding	NA	NA
Glyma.09G049300	qESP-9-1	GO:0055114	oxidation-reduction process	GO:0005506 GO:0009055 GO:0016705 GO:0019825 GO:0020037	electron carrier activity; heme binding; iron ion binding; oxidoreductase activity, acting on paired donors, with incorporation or reduction of molecular oxygen; oxygen binding	NA	NA
Glyma.09G049400	qESP-9-1	GO:0008150	biological process	GO:0003674	molecular function	NA	NA
Glyma.09G049500	qESP-9-1	GO:0006508	proteolysis	GO:0004185	serine-type carboxypeptidase activity	GO:0005576 GO:0005773 GO:0005829	cytosol; extracellular region; vacuole
Glyma.09G049600	qESP-9-1	GO:0055114	oxidation-reduction process	GO:0005506 GO:0009055 GO:0016705 GO:0019825 GO:0020037	electron carrier activity; heme binding; iron ion binding; oxidoreductase activity, acting on paired donors, with incorporation or reduction of molecular oxygen; oxygen binding	NA	NA
Glyma.09G049700	qESP-9-1	GO:0006623 GO:0009627 GO:0009697 GO:0009744 GO:0009749 GO:0009750 GO:0034976	protein targeting to vacuole; response to endoplasmic reticulum stress; response to fructose stimulus; response to glucose stimulus; response to sucrose stimulus; salicylic acid biosynthetic process; systemic acquired resistance	GO:0005509	calcium ion binding	GO:0005794 GO:0005887 GO:0017119	Golgi apparatus; Golgi transport complex; integral to plasma membrane
Glyma.09G049800	qESP-9-1	GO:0006364 GO:0006399 GO:0006655 GO:0009658 GO:0010103 GO:0042793 GO:0045036 GO:0045893	chloroplast organization; phosphatidylglycerol biosynthetic process; positive regulation of transcription, DNA-dependent; protein targeting to chloroplast; rRNA processing; stomatal complex morphogenesis; tRNA metabolic process; transcription from plastid promoter	NA	NA	GO:0009295 GO:0009507 GO:0009508	chloroplast; nucleoid; plastid chromosome
Glyma.09G049900	qESP-9-1	NA	NA	GO:0003824 GO:0008265 GO:0030151 GO:0030170	Mo-molybdopterin cofactor sulfurase activity; catalytic activity; molybdenum ion binding; pyridoxal phosphate binding	GO:0009507	chloroplast
Glyma.09G050000	qESP-9-1	NA	NA	GO:0003824 GO:0008265 GO:0030151 GO:0030170	Mo-molybdopterin cofactor sulfurase activity; catalytic activity; molybdenum ion binding; pyridoxal phosphate binding	GO:0009507	chloroplast
Glyma.09G050100	qESP-9-1	NA	NA	GO:0003824 GO:0008265 GO:0030151 GO:0030170	Mo-molybdopterin cofactor sulfurase activity; catalytic activity; molybdenum ion binding; pyridoxal phosphate binding	GO:0009507	chloroplast
Glyma.09G050200	qESP-9-1	GO:0003333 GO:0043091 GO:0051938	L-arginine import; L-glutamate import; amino acid transmembrane transport	GO:0005313 GO:0015171 GO:0015181 GO:0015189 GO:0015326	L-glutamate transmembrane transporter activity; L-lysine transmembrane transporter activity; amino acid transmembrane transporter activity; arginine transmembrane transporter activity; cationic amino acid transmembrane transporter activity	GO:0005886 GO:0016020	membrane; plasma membrane
Glyma.09G050300	qESP-9-1	GO:0006468 GO:0007169	protein phosphorylation; transmembrane receptor protein tyrosine kinase signaling pathway	GO:0004672 GO:0004674 GO:0005524 GO:0016301 GO:0016772	ATP binding; kinase activity; protein kinase activity; protein serine/threonine kinase activity; transferase activity, transferring phosphorus-containing groups	GO:0005886	plasma membrane
Glyma.09G050400	qESP-9-1	NA	NA	NA	NA	NA	NA
Glyma.09G050500	qESP-9-1	GO:0009793	embryo development ending in seed dormancy	NA	NA	GO:0005739	mitochondrion
Glyma.09G050600	qESP-9-1	GO:0003333 GO:0043091 GO:0051938	L-arginine import; L-glutamate import; amino acid transmembrane transport	GO:0005313 GO:0015171 GO:0015181 GO:0015189 GO:0015326	L-glutamate transmembrane transporter activity; L-lysine transmembrane transporter activity; amino acid transmembrane transporter activity; arginine transmembrane transporter activity; cationic amino acid transmembrane transporter activity	GO:0005886 GO:0016020	membrane; plasma membrane
Glyma.09G050700	qESP-9-1	GO:0008152	metabolic process	GO:0003824 GO:0008967 GO:0016787	catalytic activity; hydrolase activity; phosphoglycolate phosphatase activity	NA	NA
Glyma.09G050800	qESP-9-1	GO:0006508 GO:0008152 GO:0010136 GO:0015996	chlorophyll catabolic process; metabolic process; proteolysis; ureide catabolic process	GO:0008237 GO:0016787 GO:0016813 GO:0047652	allantoate deiminase activity; hydrolase activity; hydrolase activity, acting on carbon-nitrogen (but not peptide) bonds, in linear amidines; metallopeptidase activity	GO:0005783 GO:0009507	chloroplast; endoplasmic reticulum
Glyma.09G050900	qESP-9-1	GO:0009556 GO:0009827 GO:0009860 GO:0010584	microsporogenesis; plant-type cell wall modification; pollen exine formation; pollen tube growth	GO:0004650	polygalacturonase activity	GO:0005576	extracellular region
Glyma.09G051000	qESP-9-1	NA	NA	NA	NA	NA	NA
Glyma.09G051100	qESP-9-1	GO:0009832 GO:0009834 GO:0010413 GO:0030244 GO:0042546 GO:0042742 GO:0044036 GO:0045492 GO:0050832	cell wall biogenesis; cell wall macromolecule metabolic process; cellulose biosynthetic process; defense response to bacterium; defense response to fungus; glucuronoxylan metabolic process; plant-type cell wall biogenesis; secondary cell wall biogenesis; xylan biosynthetic process	GO:0016757 GO:0016759 GO:0016760	cellulose synthase (UDP-forming) activity; cellulose synthase activity; transferase activity, transferring glycosyl groups	GO:0005886 GO:0016020	membrane; plasma membrane
Glyma.09G051200	qESP-9-1	GO:0006656 GO:0009058	biosynthetic process; phosphatidylcholine biosynthetic process	GO:0003824 GO:0004105 GO:0016779	catalytic activity; choline-phosphate cytidylyltransferase activity; nucleotidyltransferase activity	GO:0005634	nucleus
Glyma.09G051300	qESP-9-1	NA	NA	NA	NA	NA	NA
Glyma.09G051400	qESP-9-1	GO:0008152	metabolic process	GO:0003824 GO:0008168	catalytic activity; methyltransferase activity	GO:0005886	plasma membrane
Glyma.09G051500	qESP-9-1	GO:0006869 GO:0006891 GO:0010351 GO:0016558 GO:0034196 GO:1990052	ER to chloroplast lipid transport; acylglycerol transport; intra-Golgi vesicle-mediated transport; lipid transport; lithium ion transport; protein import into peroxisome matrix	GO:0042803 GO:0070300	phosphatidic acid binding; protein homodimerization activity	GO:0005634 GO:0005783 GO:0009507 GO:0009536 GO:0009707 GO:0009941 GO:0016020	chloroplast; chloroplast envelope; chloroplast outer membrane; endoplasmic reticulum; membrane; nucleus; plastid
Glyma.09G051600	qESP-9-1	GO:0006464 GO:0006511 GO:0016567 GO:0042787	cellular protein modification process; protein ubiquitination; protein ubiquitination involved in ubiquitin-dependent protein catabolic process; ubiquitin-dependent protein catabolic process	GO:0004842 GO:0016881	acid-amino acid ligase activity; ubiquitin-protein ligase activity	GO:0000151 GO:0005622 GO:0005634 GO:0005739 GO:0005829 GO:0009506 GO:0016020	cytosol; intracellular; membrane; mitochondrion; nucleus; plasmodesma; ubiquitin ligase complex
Glyma.09G051700	qESP-9-1	NA	NA	NA	NA	NA	NA
Glyma.09G051800	qESP-9-1	GO:0008150	biological process	GO:0003674	molecular function	GO:0009507	chloroplast
Glyma.09G051900	qESP-9-1	GO:0008150	biological process	GO:0003674	molecular function	GO:0005634	nucleus
Glyma.09G052000	qESP-9-1	GO:0000041 GO:0000303 GO:0006487 GO:0006754 GO:0006812 GO:0006825 GO:0007165 GO:0008152 GO:0008219 GO:0009723 GO:0009755 GO:0009863 GO:0009873 GO:0010119 GO:0030001 GO:0046034	ATP biosynthetic process; ATP metabolic process; cation transport; cell death; copper ion transport; ethylene mediated signaling pathway; hormone-mediated signaling pathway; metabolic process; metal ion transport; protein N-linked glycosylation; regulation of stomatal movement; response to ethylene stimulus; response to superoxide; salicylic acid mediated signaling pathway; signal transduction; t…	GO:0000166 GO:0003824 GO:0005375 GO:0005507 GO:0005524 GO:0015662 GO:0016820 GO:0043682 GO:0046872	ATP binding; ATPase activity, coupled to transmembrane movement of ions, phosphorylative mechanism; catalytic activity; copper-transporting ATPase activity; copper ion binding; copper ion transmembrane transporter activity; hydrolase activity, acting on acid anhydrides, catalyzing transmembrane movement of substances; metal ion binding; nucleotide binding	GO:0005768 GO:0005794 GO:0005802 GO:0016020 GO:0016021	Golgi apparatus; endosome; integral to membrane; membrane; trans-Golgi network
Glyma.09G052100	qESP-9-1	GO:0001510 GO:0006412	RNA methylation; translation	GO:0003735	structural constituent of ribosome	GO:0005622 GO:0005737 GO:0005840 GO:0022625 GO:0022626	cytoplasm; cytosolic large ribosomal subunit; cytosolic ribosome; intracellular; ribosome
Glyma.09G052200	qESP-9-1	GO:0009909 GO:0010228 GO:0010452 GO:0051568	histone H3-K36 methylation; histone H3-K4 methylation; regulation of flower development; vegetative to reproductive phase transition of meristem	NA	NA	GO:0005634 GO:0005737	cytoplasm; nucleus
Glyma.09G052300	qESP-9-1	NA	NA	NA	NA	NA	NA
Glyma.09G052400	qESP-9-1	GO:0008150	biological process	NA	NA	GO:0005739	mitochondrion
Glyma.09G052500	qESP-9-1	GO:0001666 GO:0006397	mRNA processing; response to hypoxia	GO:0003676 GO:0004386 GO:0005515 GO:0005524 GO:0008026	ATP-dependent helicase activity; ATP binding; helicase activity; nucleic acid binding; protein binding	GO:0005634 GO:0005654 GO:0005730 GO:0016020 GO:0016607 GO:0035145	exon-exon junction complex; membrane; nuclear speck; nucleolus; nucleoplasm; nucleus
Glyma.09G052600	qESP-9-1	GO:0006508 GO:0010304 GO:0030163	PSII associated light-harvesting complex II catabolic process; protein catabolic process; proteolysis	GO:0000166 GO:0004176 GO:0004222 GO:0005524 GO:0008237 GO:0008270 GO:0016887 GO:0017111	ATP-dependent peptidase activity; ATP binding; ATPase activity; metalloendopeptidase activity; metallopeptidase activity; nucleoside-triphosphatase activity; nucleotide binding; zinc ion binding	GO:0005739 GO:0009507 GO:0009534 GO:0009535 GO:0009579 GO:0009941 GO:0016020 GO:0016021	chloroplast; chloroplast envelope; chloroplast thylakoid; chloroplast thylakoid membrane; integral to membrane; membrane; mitochondrion; thylakoid
Glyma.09G052700	qESP-9-1	GO:0006813 GO:0009555 GO:0071805	pollen development; potassium ion transmembrane transport; potassium ion transport	GO:0015079	potassium ion transmembrane transporter activity	GO:0005737 GO:0005886 GO:0016020	cytoplasm; membrane; plasma membrane
Glyma.09G052800	qESP-9-1	GO:0006355 GO:0009873 GO:0010200	ethylene mediated signaling pathway; regulation of transcription, DNA-dependent; response to chitin	GO:0003677 GO:0003700	DNA binding; sequence-specific DNA binding transcription factor activity	GO:0005634	nucleus
Glyma.09G052900	qESP-9-1	GO:0006355 GO:0009873 GO:0010200	ethylene mediated signaling pathway; regulation of transcription, DNA-dependent; response to chitin	GO:0003677 GO:0003700	DNA binding; sequence-specific DNA binding transcription factor activity	GO:0005634	nucleus
Glyma.09G053000	qESP-9-1	GO:0006355 GO:0009873 GO:0010200	ethylene mediated signaling pathway; regulation of transcription, DNA-dependent; response to chitin	GO:0003677 GO:0003700	DNA binding; sequence-specific DNA binding transcription factor activity	GO:0005634	nucleus
Glyma.09G053100	qESP-9-1	NA	NA	NA	NA	NA	NA
Glyma.09G053200	qESP-9-1	NA	NA	NA	NA	NA	NA
Glyma.09G053300	qESP-9-1	NA	NA	NA	NA	NA	NA
Glyma.09G053400	qESP-9-1	GO:0008150	biological process	NA	NA	GO:0005575	cellular component
Glyma.09G053500	qESP-9-1	NA	NA	NA	NA	NA	NA
Glyma.09G053600	qESP-9-1	NA	NA	NA	NA	NA	NA
Glyma.09G053700	qESP-9-1	GO:0008150	biological process	NA	NA	GO:0005575	cellular component
Glyma.09G053800	qESP-9-1	GO:0008150	biological process	NA	NA	GO:0005575	cellular component
Glyma.09G053900	qESP-9-1	NA	NA	NA	NA	NA	NA
Glyma.09G054000	qESP-9-1	GO:0008150	biological process	NA	NA	GO:0005575	cellular component
Glyma.09G054100	qESP-9-1	GO:0008150	biological process	NA	NA	GO:0005575	cellular component
Glyma.09G054200	qESP-9-1	GO:0008150	biological process	NA	NA	GO:0005575	cellular component
Glyma.09G054300	qESP-9-1	GO:0010219 GO:0045892 GO:0048440 GO:0048441 GO:0048442 GO:0048443 GO:0048510 GO:0048833	carpel development; negative regulation of transcription, DNA-dependent; petal development; regulation of timing of transition from vegetative to reproductive phase; regulation of vernalization response; sepal development; specification of floral organ number; stamen development	GO:0003674	molecular function	GO:0005634 GO:0016592	mediator complex; nucleus
Glyma.09G054400	qESP-9-1	GO:0008150	biological process	GO:0003674	molecular function	GO:0005886	plasma membrane
Glyma.09G054500	qESP-9-1	GO:0008150	biological process	GO:0003674	molecular function	NA	NA
Glyma.09G054600	qESP-9-1	NA	NA	NA	NA	NA	NA
Glyma.09G054700	qESP-9-1	GO:0008150	biological process	NA	NA	GO:0005634	nucleus
Glyma.09G054800	qESP-9-1	GO:0008150	biological process	NA	NA	GO:0005575	cellular component
Glyma.09G054900	qESP-9-1	NA	NA	NA	NA	NA	NA
Glyma.09G055000	qESP-9-1	GO:0006869	lipid transport	GO:0008289	lipid binding	GO:0005576	extracellular region
Glyma.09G055100	qESP-9-1	GO:0006869 GO:0045893	lipid transport; positive regulation of transcription, DNA-dependent	GO:0008289	lipid binding	GO:0005576	extracellular region
Glyma.09G055200	qESP-9-1	NA	NA	NA	NA	NA	NA
Glyma.09G055300	qESP-9-1	GO:0009409 GO:0009789 GO:0012501 GO:0046473 GO:0090333	phosphatidic acid metabolic process; positive regulation of abscisic acid mediated signaling pathway; programmed cell death; regulation of stomatal closure; response to cold	GO:0003824 GO:0004630 GO:0005509	calcium ion binding; catalytic activity; phospholipase D activity	GO:0005773 GO:0005886 GO:0009506 GO:0015630 GO:0016020	membrane; microtubule cytoskeleton; plasma membrane; plasmodesma; vacuole
Glyma.09G055400	qESP-9-1	GO:0006468	protein phosphorylation	GO:0004672 GO:0004674 GO:0005524 GO:0016301 GO:0016772	ATP binding; kinase activity; protein kinase activity; protein serine/threonine kinase activity; transferase activity, transferring phosphorus-containing groups	GO:0005634	nucleus
Glyma.09G055500	qESP-9-1	NA	NA	NA	NA	NA	NA
Glyma.09G055600	qESP-9-1	GO:0006754 GO:0006812 GO:0008152 GO:0030001 GO:0055069	ATP biosynthetic process; cation transport; metabolic process; metal ion transport; zinc ion homeostasis	GO:0000166 GO:0003824 GO:0005524 GO:0015434 GO:0015662 GO:0016818 GO:0046872 GO:0046873	ATP binding; ATPase activity, coupled to transmembrane movement of ions, phosphorylative mechanism; cadmium-transporting ATPase activity; catalytic activity; hydrolase activity, acting on acid anhydrides, in phosphorus-containing anhydrides; metal ion binding; metal ion transmembrane transporter activity; nucleotide binding	GO:0005886 GO:0016020 GO:0016021	integral to membrane; membrane; plasma membrane
Glyma.09G055700	qESP-9-1	GO:0006468	protein phosphorylation	GO:0004672 GO:0004674 GO:0004713 GO:0005524 GO:0016301 GO:0016772	ATP binding; kinase activity; protein kinase activity; protein serine/threonine kinase activity; protein tyrosine kinase activity; transferase activity, transferring phosphorus-containing groups	GO:0005886	plasma membrane
Glyma.09G055800	qESP-9-1	GO:0006468 GO:0007389 GO:0048438 GO:0048439 GO:0048544	floral whorl development; flower morphogenesis; pattern specification process; protein phosphorylation; recognition of pollen	GO:0004672 GO:0005524 GO:0016772 GO:0030246	ATP binding; carbohydrate binding; protein kinase activity; transferase activity, transferring phosphorus-containing groups	GO:0005886	plasma membrane
Glyma.09G055900	qESP-9-1	GO:0006468	protein phosphorylation	GO:0004672 GO:0004674 GO:0004713 GO:0005524 GO:0016301 GO:0016772	ATP binding; kinase activity; protein kinase activity; protein serine/threonine kinase activity; protein tyrosine kinase activity; transferase activity, transferring phosphorus-containing groups	GO:0005886	plasma membrane
Glyma.09G056000	qESP-9-1	GO:0006468 GO:0046777	protein autophosphorylation; protein phosphorylation	GO:0004672 GO:0004674 GO:0005524 GO:0016301 GO:0016772 GO:0030246 GO:0031625	ATP binding; carbohydrate binding; kinase activity; protein kinase activity; protein serine/threonine kinase activity; transferase activity, transferring phosphorus-containing groups; ubiquitin protein ligase binding	GO:0005886	plasma membrane
Glyma.09G056100	qESP-9-1	GO:0006355 GO:0006511 GO:0006635 GO:0007165 GO:0007623 GO:0009639 GO:0009908 GO:0010114 GO:0010498 GO:0016558 GO:0031146 GO:0042752 GO:0043153 GO:0044265	SCF-dependent proteasomal ubiquitin-dependent protein catabolic process; cellular macromolecule catabolic process; circadian rhythm; entrainment of circadian clock by photoperiod; fatty acid beta-oxidation; flower development; proteasomal protein catabolic process; protein import into peroxisome matrix; regulation of circadian rhythm; regulation of transcription, DNA-dependent; response to red li…	GO:0004842 GO:0004871 GO:0005515 GO:0009882	blue light photoreceptor activity; protein binding; signal transducer activity; ubiquitin-protein ligase activity	GO:0005634 GO:0005829 GO:0019005	SCF ubiquitin ligase complex; cytosol; nucleus
Glyma.09G056200	qESP-9-1	GO:0008150	biological process	NA	NA	GO:0005739	mitochondrion
Glyma.09G056300	qESP-9-1	GO:0006200 GO:0006754 GO:0006812 GO:0006857 GO:0006865 GO:0006888 GO:0008152 GO:0010167 GO:0015706 GO:0015991 GO:0043090 GO:0052541 GO:0052546	ATP biosynthetic process; ATP catabolic process; ATP hydrolysis coupled proton transport; ER to Golgi vesicle-mediated transport; amino acid import; amino acid transport; cation transport; cell wall pectin metabolic process; metabolic process; nitrate transport; oligopeptide transport; plant-type cell wall cellulose metabolic process; response to nitrate	GO:0000166 GO:0000287 GO:0003824 GO:0005515 GO:0005524 GO:0008553 GO:0015662 GO:0016887 GO:0046872	ATP binding; ATPase activity; ATPase activity, coupled to transmembrane movement of ions, phosphorylative mechanism; catalytic activity; hydrogen-exporting ATPase activity, phosphorylative mechanism; magnesium ion binding; metal ion binding; nucleotide binding; protein binding	GO:0005774 GO:0005794 GO:0005886 GO:0009506 GO:0016020 GO:0016021	Golgi apparatus; integral to membrane; membrane; plasma membrane; plasmodesma; vacuolar membrane
Glyma.09G056400	qESP-9-1	GO:0006952 GO:0007165	defense response; signal transduction	GO:0000166 GO:0017111 GO:0043531	ADP binding; nucleoside-triphosphatase activity; nucleotide binding	GO:0005622 GO:0005634	intracellular; nucleus
Glyma.09G056500	qESP-9-1	GO:0006952 GO:0007165	defense response; signal transduction	GO:0000166 GO:0017111 GO:0043531	ADP binding; nucleoside-triphosphatase activity; nucleotide binding	GO:0005622 GO:0005737	cytoplasm; intracellular
Glyma.09G056600	qESP-9-1	GO:0008150	biological process	GO:0003674	molecular function	GO:0005634	nucleus
Glyma.09G056700	qESP-9-1	GO:0006869	lipid transport	GO:0008289	lipid binding	GO:0005576	extracellular region
Glyma.09G056800	qESP-9-1	GO:0009658 GO:0016226	chloroplast organization; iron-sulfur cluster assembly	GO:0005198 GO:0005506 GO:0051536	iron-sulfur cluster binding; iron ion binding; structural molecule activity	GO:0009507 GO:0009570	chloroplast; chloroplast stroma
Glyma.09G056900	qESP-9-1	GO:0008150 GO:0009741	biological process; response to brassinosteroid stimulus	GO:0003674	molecular function	GO:0005634	nucleus
Glyma.09G057000	qESP-9-1	GO:0006952 GO:0007165	defense response; signal transduction	GO:0000166 GO:0017111 GO:0043531	ADP binding; nucleoside-triphosphatase activity; nucleotide binding	GO:0005622 GO:0005737	cytoplasm; intracellular
Glyma.09G057100	qESP-9-1	GO:0000041 GO:0006826 GO:0006979 GO:0009736 GO:0010106 GO:0010167 GO:0010359 GO:0015706 GO:0055114	cellular response to iron ion starvation; cytokinin mediated signaling pathway; iron ion transport; nitrate transport; oxidation-reduction process; regulation of anion channel activity; response to nitrate; response to oxidative stress; transition metal ion transport	GO:0004601 GO:0020037	heme binding; peroxidase activity	GO:0005576	extracellular region
Glyma.09G057200	qESP-9-1	GO:0008150	biological process	GO:0003674	molecular function	GO:0005634	nucleus
Glyma.09G057300	qESP-9-1	GO:0005975 GO:0006012 GO:0009737 GO:0019761	carbohydrate metabolic process; galactose metabolic process; glucosinolate biosynthetic process; response to abscisic acid stimulus	GO:0003824 GO:0004034 GO:0016853 GO:0030246	aldose 1-epimerase activity; carbohydrate binding; catalytic activity; isomerase activity	GO:0005829	cytosol
Glyma.09G057400	qESP-9-1	GO:0007010 GO:0007015 GO:0009737 GO:0016482 GO:0030042 GO:0048767 GO:0051014 GO:0051764	actin crosslink formation; actin filament depolymerization; actin filament organization; actin filament severing; cytoplasmic transport; cytoskeleton organization; response to abscisic acid stimulus; root hair elongation	GO:0003779 GO:0051015	actin binding; actin filament binding	GO:0005737 GO:0005829 GO:0005884	actin filament; cytoplasm; cytosol
Glyma.09G057500	qESP-9-1	GO:0008150	biological process	GO:0000166	nucleotide binding	GO:0005737 GO:0005829 GO:0005834	cytoplasm; cytosol; heterotrimeric G-protein complex
Glyma.09G057600	qESP-9-1	NA	NA	NA	NA	NA	NA
Glyma.09G057700	qESP-9-1	GO:0006606 GO:0009303 GO:0009553 GO:0009790	embryo development; embryo sac development; protein import into nucleus; rRNA transcription	GO:0003674	molecular function	GO:0005634 GO:0005730	nucleolus; nucleus
Glyma.09G057800	qESP-9-1	GO:0006487	protein N-linked glycosylation	GO:0003723 GO:0003729	RNA binding; mRNA binding	GO:0005737 GO:0005773 GO:0005829	cytoplasm; cytosol; vacuole
Glyma.09G057900	qESP-9-1	GO:0006406 GO:0006606 GO:0006626 GO:0051604	mRNA export from nucleus; protein import into nucleus; protein maturation; protein targeting to mitochondrion	GO:0003674 GO:0005515	molecular function; protein binding	GO:0005622 GO:0005634 GO:0005739 GO:0005741 GO:0005743 GO:0009536	intracellular; mitochondrial inner membrane; mitochondrial outer membrane; mitochondrion; nucleus; plastid
Glyma.09G058000	qESP-9-1	GO:0006499	N-terminal protein myristoylation	GO:0003674	molecular function	GO:0005634	nucleus
Glyma.09G058100	qESP-9-1	GO:0006412	translation	GO:0003735	structural constituent of ribosome	GO:0000312 GO:0005622 GO:0005840 GO:0009507 GO:0015935	chloroplast; intracellular; plastid small ribosomal subunit; ribosome; small ribosomal subunit
Glyma.09G058200	qESP-9-1	NA	NA	NA	NA	GO:0005576	extracellular region
Glyma.09G058300	qESP-9-1	GO:0006508	proteolysis	GO:0004190	aspartic-type endopeptidase activity	GO:0005576	extracellular region
Glyma.09G058400	qESP-9-1	GO:0006508	proteolysis	GO:0004190	aspartic-type endopeptidase activity	GO:0005576	extracellular region
Glyma.09G058500	qESP-9-1	GO:0008150	biological process	GO:0003676	nucleic acid binding	GO:0005575	cellular component
Glyma.09G058600	qESP-9-1	NA	NA	NA	NA	GO:0005739	mitochondrion
Glyma.09G058700	qESP-9-1	GO:0006499	N-terminal protein myristoylation	GO:0003674	molecular function	GO:0005575	cellular component
Glyma.09G058800	qESP-9-1	GO:0008202	steroid metabolic process	GO:0008142	oxysterol binding	GO:0005634	nucleus
Glyma.09G058900	qESP-9-1	GO:0008202	steroid metabolic process	GO:0008142	oxysterol binding	GO:0005634	nucleus
Glyma.09G059000	qESP-9-1	GO:0000023 GO:0006508 GO:0007020 GO:0008152 GO:0009736 GO:0019252 GO:0019761 GO:0043085 GO:0043086	cytokinin mediated signaling pathway; glucosinolate biosynthetic process; maltose metabolic process; metabolic process; microtubule nucleation; negative regulation of catalytic activity; positive regulation of catalytic activity; proteolysis; starch biosynthetic process	GO:0004252 GO:0042802	identical protein binding; serine-type endopeptidase activity	GO:0005576 GO:0005618 GO:0016020	cell wall; extracellular region; membrane
Glyma.09G059100	qESP-9-1	GO:0042023 GO:0043161 GO:0043248 GO:0051510 GO:0051788	DNA endoreduplication; proteasomal ubiquitin-dependent protein catabolic process; proteasome assembly; regulation of unidimensional cell growth; response to misfolded protein	GO:0003674	molecular function	NA	NA
Glyma.09G059200	qESP-9-1	GO:0032313	regulation of Rab GTPase activity	GO:0005097	RAB GTPase activator activity	GO:0005622 GO:0005737	cytoplasm; intracellular
Glyma.09G059300	qESP-9-1	GO:0008150	biological process	GO:0003674	molecular function	GO:0005634 GO:0005886	nucleus; plasma membrane
Glyma.09G059400	qESP-9-1	GO:0008150	biological process	GO:0003674	molecular function	GO:0009507	chloroplast
Glyma.09G059500	qESP-9-1	GO:0006499 GO:0048268	N-terminal protein myristoylation; clathrin coat assembly	GO:0005543 GO:0005545 GO:0030276	1-phosphatidylinositol binding; clathrin binding; phospholipid binding	GO:0005634 GO:0030118	clathrin coat; nucleus
Glyma.09G059600	qESP-9-1	GO:0006096 GO:0006511 GO:0008150 GO:0009060 GO:0009853 GO:0046686 GO:0051788 GO:0080129	aerobic respiration; biological process; glycolysis; photorespiration; proteasome core complex assembly; response to cadmium ion; response to misfolded protein; ubiquitin-dependent protein catabolic process	GO:0003674	molecular function	GO:0005739 GO:0005753 GO:0009536	mitochondrial proton-transporting ATP synthase complex; mitochondrion; plastid
Glyma.09G059700	qESP-9-1	GO:0006355 GO:0009733 GO:0045893	positive regulation of transcription, DNA-dependent; regulation of transcription, DNA-dependent; response to auxin stimulus	GO:0003700 GO:0005515 GO:0008270 GO:0043565	protein binding; sequence-specific DNA binding; sequence-specific DNA binding transcription factor activity; zinc ion binding	GO:0005634	nucleus
Glyma.09G059800	qESP-9-1	GO:0006355 GO:0045036 GO:0045893	positive regulation of transcription, DNA-dependent; protein targeting to chloroplast; regulation of transcription, DNA-dependent	NA	NA	GO:0005634	nucleus
Glyma.09G059900	qESP-9-1	GO:0048367 GO:0048467	gynoecium development; shoot system development	GO:0003676 GO:0003723	RNA binding; nucleic acid binding	GO:0005634	nucleus
Glyma.09G060000	qESP-9-1	NA	NA	NA	NA	NA	NA
Glyma.09G060100	qESP-9-1	GO:0006260 GO:0006266 GO:0006281 GO:0006302 GO:0006310 GO:0006974 GO:0010165 GO:0051103	DNA ligation; DNA ligation involved in DNA repair; DNA recombination; DNA repair; DNA replication; double-strand break repair; response to DNA damage stimulus; response to X-ray	GO:0003677 GO:0003909 GO:0003910 GO:0005515 GO:0005524	ATP binding; DNA binding; DNA ligase (ATP) activity; DNA ligase activity; protein binding	GO:0005634 GO:0009506 GO:0032807 GO:0048046	DNA ligase IV complex; apoplast; nucleus; plasmodesma
Glyma.09G060200	qESP-9-1	GO:0006355 GO:0009694 GO:0009753	jasmonic acid metabolic process; regulation of transcription, DNA-dependent; response to jasmonic acid stimulus	GO:0003677 GO:0003700	DNA binding; sequence-specific DNA binding transcription factor activity	GO:0005634	nucleus
Glyma.09G060300	qESP-9-1	NA	NA	GO:0003993 GO:0004722 GO:0016787	acid phosphatase activity; hydrolase activity; protein serine/threonine phosphatase activity	GO:0005576	extracellular region
Glyma.09G060400	qESP-9-1	GO:0010496 GO:0046907	intercellular transport; intracellular transport	GO:0005515	protein binding	GO:0005783 GO:0009506	endoplasmic reticulum; plasmodesma
Glyma.09G060500	qESP-9-1	GO:0009855 GO:0009887 GO:0009944 GO:0010014 GO:0010051 GO:0010075 GO:0019538 GO:0048439 GO:0048519	determination of bilateral symmetry; flower morphogenesis; meristem initiation; negative regulation of biological process; organ morphogenesis; polarity specification of adaxial/abaxial axis; protein metabolic process; regulation of meristem growth; xylem and phloem pattern formation	NA	NA	GO:0005575	cellular component
Glyma.09G060600	qESP-9-1	GO:0008150	biological process	GO:0003674	molecular function	NA	NA
Glyma.09G060700	qESP-9-1	NA	NA	NA	NA	GO:0005575	cellular component
Glyma.09G060800	qESP-9-1	NA	NA	NA	NA	NA	NA
Glyma.09G060900	qESP-9-1	GO:0000038 GO:0006633 GO:0009409 GO:0042335	cuticle development; fatty acid biosynthetic process; response to cold; very long-chain fatty acid metabolic process	GO:0000036 GO:0005515 GO:0031177 GO:0046872 GO:0050897	ACP phosphopantetheine attachment site binding involved in fatty acid biosynthetic process; cobalt ion binding; metal ion binding; phosphopantetheine binding; protein binding	GO:0005739 GO:0005759	mitochondrial matrix; mitochondrion
Glyma.09G061000	qESP-9-1	GO:0006412	translation	GO:0003735	structural constituent of ribosome	GO:0005618 GO:0005622 GO:0005737 GO:0005773 GO:0005774 GO:0005829 GO:0005840 GO:0005886 GO:0009507 GO:0015934 GO:0016020 GO:0022625 GO:0022626	cell wall; chloroplast; cytoplasm; cytosol; cytosolic large ribosomal subunit; cytosolic ribosome; intracellular; large ribosomal subunit; membrane; plasma membrane; ribosome; vacuolar membrane; vacuole
Glyma.09G061100	qESP-9-1	GO:0008150	biological process	GO:0003674	molecular function	GO:0005634	nucleus
Glyma.09G061200	qESP-9-1	GO:0006754 GO:0006812 GO:0006816 GO:0006882 GO:0008152 GO:0009624 GO:0070588	ATP biosynthetic process; calcium ion transmembrane transport; calcium ion transport; cation transport; cellular zinc ion homeostasis; metabolic process; response to nematode	GO:0000166 GO:0003824 GO:0005388 GO:0005515 GO:0005516 GO:0005524 GO:0015662 GO:0043621 GO:0046872	ATP binding; ATPase activity, coupled to transmembrane movement of ions, phosphorylative mechanism; calcium-transporting ATPase activity; calmodulin binding; catalytic activity; metal ion binding; nucleotide binding; protein binding; protein self-association	GO:0005886 GO:0009506 GO:0016020	membrane; plasma membrane; plasmodesma
Glyma.09G061300	qESP-9-1	GO:0008150	biological process	GO:0016757	transferase activity, transferring glycosyl groups	GO:0005768 GO:0005794 GO:0005802 GO:0009505	Golgi apparatus; endosome; plant-type cell wall; trans-Golgi network
Glyma.09G061400	qESP-9-1	NA	NA	NA	NA	NA	NA
Glyma.09G061500	qESP-9-1	GO:0008150 GO:0042023	DNA endoreduplication; biological process	NA	NA	NA	NA
Glyma.09G061600	qESP-9-1	GO:0008150 GO:0009407	biological process; toxin catabolic process	GO:0003674	molecular function	GO:0005886	plasma membrane
Glyma.09G061700	qESP-9-1	NA	NA	NA	NA	GO:0016020	membrane
Glyma.09G061800	qESP-9-1	GO:0008361 GO:0009637 GO:0009640 GO:0009723 GO:0009733 GO:0009749 GO:0009926 GO:0009958 GO:0043481 GO:0046685 GO:0048364 GO:0048443 GO:0055085	anthocyanin accumulation in tissues in response to UV light; auxin polar transport; photomorphogenesis; positive gravitropism; regulation of cell size; response to arsenic-containing substance; response to auxin stimulus; response to blue light; response to ethylene stimulus; response to glucose stimulus; root development; stamen development; transmembrane transport	GO:0005215 GO:0009672 GO:0010329	auxin:hydrogen symporter activity; auxin efflux transmembrane transporter activity; transporter activity	GO:0000323 GO:0005886 GO:0009925 GO:0016021	basal plasma membrane; integral to membrane; lytic vacuole; plasma membrane
Glyma.09G061900	qESP-9-1	GO:0002679 GO:0006355 GO:0010200 GO:0035556 GO:0042742	defense response to bacterium; intracellular signal transduction; regulation of transcription, DNA-dependent; respiratory burst involved in defense response; response to chitin	GO:0003700 GO:0005516 GO:0043565	calmodulin binding; sequence-specific DNA binding; sequence-specific DNA binding transcription factor activity	GO:0005634	nucleus
Glyma.09G062000	qESP-9-1	NA	NA	NA	NA	NA	NA
Glyma.09G062100	qESP-9-1	GO:0006952	defense response	GO:0043531	ADP binding	GO:0009506	plasmodesma
Glyma.09G062200	qESP-9-1	GO:0008150	biological process	GO:0003674	molecular function	GO:0005575	cellular component
Glyma.09G062300	qESP-9-1	GO:0045454	cell redox homeostasis	GO:0008794 GO:0009055 GO:0015035	arsenate reductase (glutaredoxin) activity; electron carrier activity; protein disulfide oxidoreductase activity	GO:0005783 GO:0005794 GO:0009507	Golgi apparatus; chloroplast; endoplasmic reticulum
Glyma.09G062400	qESP-9-1	GO:0006355	regulation of transcription, DNA-dependent	GO:0003677 GO:0003700 GO:0043565	DNA binding; sequence-specific DNA binding; sequence-specific DNA binding transcription factor activity	GO:0005634	nucleus
Glyma.09G062500	qESP-9-1	GO:0006468	protein phosphorylation	GO:0004672 GO:0004674 GO:0004713 GO:0005524 GO:0016772	ATP binding; protein kinase activity; protein serine/threonine kinase activity; protein tyrosine kinase activity; transferase activity, transferring phosphorus-containing groups	GO:0005886	plasma membrane
Glyma.09G062600	qESP-9-1	GO:0005975 GO:0006073	carbohydrate metabolic process; cellular glucan metabolic process	GO:0004553 GO:0016762 GO:0016798	hydrolase activity, acting on glycosyl bonds; hydrolase activity, hydrolyzing O-glycosyl compounds; xyloglucan:xyloglucosyl transferase activity	GO:0005576 GO:0005618 GO:0005794 GO:0048046	Golgi apparatus; apoplast; cell wall; extracellular region
Glyma.09G062700	qESP-9-1	GO:0016556	mRNA modification	NA	NA	GO:0005739 GO:0009506	mitochondrion; plasmodesma
Glyma.09G062800	qESP-9-1	GO:0006355 GO:0007623 GO:0009416 GO:0009735 GO:0009740 GO:0009910 GO:0010187 GO:0010380 GO:0010468	circadian rhythm; gibberellic acid mediated signaling pathway; negative regulation of flower development; negative regulation of seed germination; regulation of chlorophyll biosynthetic process; regulation of gene expression; regulation of transcription, DNA-dependent; response to cytokinin stimulus; response to light stimulus	GO:0003700 GO:0008270 GO:0043565 GO:0044212	sequence-specific DNA binding; sequence-specific DNA binding transcription factor activity; transcription regulatory region DNA binding; zinc ion binding	GO:0005634	nucleus
Glyma.09G062900	qESP-9-1	GO:0005975 GO:0005990 GO:0019513 GO:0019515	carbohydrate metabolic process; lactose catabolic process; lactose catabolic process, using glucoside 3-dehydrogenase; lactose catabolic process via UDP-galactose	GO:0003824 GO:0004553 GO:0004565 GO:0043169	beta-galactosidase activity; catalytic activity; cation binding; hydrolase activity, hydrolyzing O-glycosyl compounds	GO:0005576 GO:0005618	cell wall; extracellular region
Glyma.09G063000	qESP-9-1	GO:0007020 GO:0009736 GO:0055114	cytokinin mediated signaling pathway; microtubule nucleation; oxidation-reduction process	GO:0008131 GO:0016491	oxidoreductase activity; primary amine oxidase activity	GO:0005739	mitochondrion
Glyma.09G063100	qESP-9-1	GO:0006281 GO:0009826 GO:0009908 GO:0009965 GO:0010090 GO:0010224	DNA repair; flower development; leaf morphogenesis; response to UV-B; trichome morphogenesis; unidimensional cell growth	GO:0046872	metal ion binding	GO:0005634 GO:0005730 GO:0005737 GO:0005829 GO:0080008	CUL4-RING ubiquitin ligase complex; cytoplasm; cytosol; nucleolus; nucleus
Glyma.09G063200	qESP-9-1	GO:0006468	protein phosphorylation	GO:0004672 GO:0004674 GO:0004713 GO:0005524 GO:0016301 GO:0016772	ATP binding; kinase activity; protein kinase activity; protein serine/threonine kinase activity; protein tyrosine kinase activity; transferase activity, transferring phosphorus-containing groups	GO:0005886	plasma membrane
Glyma.09G063300	qESP-9-1	GO:0008150 GO:0030003 GO:0070838	biological process; cellular cation homeostasis; divalent metal ion transport	GO:0003674	molecular function	NA	NA
Glyma.09G063400	qESP-9-1	GO:0006413	translational initiation	GO:0003743	translation initiation factor activity	GO:0005737	cytoplasm
Glyma.09G063500	qESP-9-1	GO:0009690 GO:0009823 GO:0055114	cytokinin catabolic process; cytokinin metabolic process; oxidation-reduction process	GO:0003824 GO:0008131 GO:0008762 GO:0016491 GO:0016614 GO:0019139 GO:0050660	UDP-N-acetylmuramate dehydrogenase activity; catalytic activity; cytokinin dehydrogenase activity; flavin adenine dinucleotide binding; oxidoreductase activity; oxidoreductase activity, acting on CH-OH group of donors; primary amine oxidase activity	GO:0005576 GO:0005773	extracellular region; vacuole
Glyma.09G063600	qESP-9-1	GO:0008150	biological process	GO:0003674	molecular function	GO:0005739	mitochondrion
Glyma.09G063700	qESP-9-1	GO:0009690 GO:0009823 GO:0055114	cytokinin catabolic process; cytokinin metabolic process; oxidation-reduction process	GO:0003824 GO:0008131 GO:0008762 GO:0016491 GO:0016614 GO:0019139 GO:0050660	UDP-N-acetylmuramate dehydrogenase activity; catalytic activity; cytokinin dehydrogenase activity; flavin adenine dinucleotide binding; oxidoreductase activity; oxidoreductase activity, acting on CH-OH group of donors; primary amine oxidase activity	GO:0005576 GO:0005788	endoplasmic reticulum lumen; extracellular region
Glyma.09G063800	qESP-9-1	GO:0006414	translational elongation	GO:0003746	translation elongation factor activity	GO:0005829 GO:0005853 GO:0005886	cytosol; eukaryotic translation elongation factor 1 complex; plasma membrane
Glyma.09G063900	qESP-9-1	GO:0009690 GO:0009823 GO:0055114	cytokinin catabolic process; cytokinin metabolic process; oxidation-reduction process	GO:0003824 GO:0008131 GO:0008762 GO:0016491 GO:0016614 GO:0019139 GO:0050660	UDP-N-acetylmuramate dehydrogenase activity; catalytic activity; cytokinin dehydrogenase activity; flavin adenine dinucleotide binding; oxidoreductase activity; oxidoreductase activity, acting on CH-OH group of donors; primary amine oxidase activity	GO:0005576 GO:0005773	extracellular region; vacuole
Glyma.09G064000	qESP-9-1	GO:0008150	biological process	GO:0003824	catalytic activity	GO:0005575	cellular component
Glyma.09G064100	qESP-9-1	NA	NA	NA	NA	NA	NA
Glyma.09G064200	qESP-9-1	GO:0006355 GO:0010200	regulation of transcription, DNA-dependent; response to chitin	GO:0003677 GO:0003700	DNA binding; sequence-specific DNA binding transcription factor activity	GO:0005634	nucleus
Glyma.09G064300	qESP-9-1	GO:0006259 GO:0006281 GO:0006310 GO:0009432	DNA metabolic process; DNA recombination; DNA repair; SOS response	GO:0000166 GO:0003677 GO:0003697 GO:0005524 GO:0008094 GO:0017111	ATP binding; DNA-dependent ATPase activity; DNA binding; nucleoside-triphosphatase activity; nucleotide binding; single-stranded DNA binding	GO:0005739	mitochondrion
Glyma.09G064400	qESP-9-1	GO:0006281 GO:0006334 GO:0009294 GO:0046686	DNA mediated transformation; DNA repair; nucleosome assembly; response to cadmium ion	GO:0003677	DNA binding	GO:0005634 GO:0005737 GO:0005829 GO:0005886	cytoplasm; cytosol; nucleus; plasma membrane
Glyma.09G064500	qESP-9-1	GO:0006412 GO:0010267 GO:0035196 GO:0042254 GO:0051607	defense response to virus; production of miRNAs involved in gene silencing by miRNA; production of ta-siRNAs involved in RNA interference; ribosome biogenesis; translation	GO:0003735	structural constituent of ribosome	GO:0005622 GO:0005739 GO:0005840 GO:0009536	intracellular; mitochondrion; plastid; ribosome
Glyma.09G064600	qESP-9-1	NA	NA	GO:0003993 GO:0016787	acid phosphatase activity; hydrolase activity	GO:0005737	cytoplasm
Glyma.09G064700	qESP-9-1	GO:0000165 GO:0002679 GO:0006355 GO:0006612 GO:0006944 GO:0007154 GO:0008219 GO:0009408 GO:0009409 GO:0009410 GO:0009595 GO:0009611 GO:0009617 GO:0009625 GO:0009627 GO:0009682 GO:0009697 GO:0009738 GO:0009862 GO:0009863 GO:0009867 GO:0010112 GO:0010200 GO:0010310 GO:0010363 GO:0016045 GO:0030968 GO:0031347 GO:0031348 GO:0035304 GO:0042742 GO:0043069 GO:0043900 GO:0045087 GO:0045088 GO:0045893 GO:…	MAPK cascade; abscisic acid mediated signaling pathway; cell communication; cell death; cellular membrane fusion; defense response to bacterium; defense response to fungus; detection of bacterium; detection of biotic stimulus; endoplasmic reticulum unfolded protein response; induced systemic resistance; innate immune response; jasmonic acid mediated signaling pathway; negative regulation of defen…	GO:0005515	protein binding	GO:0005634 GO:0005737	cytoplasm; nucleus
Glyma.09G064800	qESP-9-1	GO:0008150	biological process	GO:0003674	molecular function	GO:0005634	nucleus
Glyma.09G064900	qESP-9-1	GO:0008150	biological process	GO:0003677 GO:0046983	DNA binding; protein dimerization activity	GO:0005634	nucleus
Glyma.09G065000	qESP-9-1	GO:0000165 GO:0002237 GO:0002679 GO:0006569 GO:0006612 GO:0006944 GO:0009581 GO:0009595 GO:0009625 GO:0009627 GO:0009646 GO:0009684 GO:0009697 GO:0009862 GO:0009863 GO:0009867 GO:0010119 GO:0010197 GO:0010200 GO:0010310 GO:0010363 GO:0030968 GO:0031347 GO:0031348 GO:0035556 GO:0042742 GO:0043069 GO:0043900 GO:0045087 GO:0050832	MAPK cascade; cellular membrane fusion; defense response to bacterium; defense response to fungus; detection of biotic stimulus; detection of external stimulus; endoplasmic reticulum unfolded protein response; indoleacetic acid biosynthetic process; innate immune response; intracellular signal transduction; jasmonic acid mediated signaling pathway; negative regulation of defense response; negativ…	GO:0005516	calmodulin binding	GO:0005634 GO:0005737	cytoplasm; nucleus
Glyma.09G065100	qESP-9-1	NA	NA	NA	NA	GO:0005634	nucleus
Glyma.09G065200	qESP-9-1	GO:0006468	protein phosphorylation	GO:0004672 GO:0004674 GO:0005524 GO:0016301 GO:0016772	ATP binding; kinase activity; protein kinase activity; protein serine/threonine kinase activity; transferase activity, transferring phosphorus-containing groups	GO:0005634 GO:0009506	nucleus; plasmodesma
Glyma.09G065300	qESP-9-1	GO:0005975 GO:0007568 GO:0007623 GO:0009409 GO:0009651 GO:0009737 GO:0009749 GO:0009793 GO:0010029 GO:0010030 GO:0019432 GO:0045995	aging; carbohydrate metabolic process; circadian rhythm; embryo development ending in seed dormancy; positive regulation of seed germination; regulation of embryonic development; regulation of seed germination; response to abscisic acid stimulus; response to cold; response to glucose stimulus; response to salt stress; triglyceride biosynthetic process	GO:0004144 GO:0008374	O-acyltransferase activity; diacylglycerol O-acyltransferase activity	GO:0005634 GO:0009941 GO:0016020	chloroplast envelope; membrane; nucleus
Glyma.09G065400	qESP-9-1	NA	NA	NA	NA	NA	NA
Glyma.09G065500	qESP-9-1	NA	NA	NA	NA	NA	NA
Glyma.09G065600	qESP-9-1	GO:0006094 GO:0006096 GO:0006413 GO:0009651 GO:0046686	gluconeogenesis; glycolysis; response to cadmium ion; response to salt stress; translational initiation	GO:0003676 GO:0003743 GO:0004386 GO:0005515 GO:0005524 GO:0008026	ATP-dependent helicase activity; ATP binding; helicase activity; nucleic acid binding; protein binding; translation initiation factor activity	GO:0005618 GO:0005634 GO:0005730 GO:0005737 GO:0005829 GO:0009506 GO:0016020 GO:0048046	apoplast; cell wall; cytoplasm; cytosol; membrane; nucleolus; nucleus; plasmodesma
Glyma.09G065700	qESP-9-1	GO:0006499 GO:0006511 GO:0009853 GO:0010064 GO:0019722 GO:0040007 GO:0051788 GO:0080129	N-terminal protein myristoylation; calcium-mediated signaling; embryonic shoot morphogenesis; growth; photorespiration; proteasome core complex assembly; response to misfolded protein; ubiquitin-dependent protein catabolic process	GO:0004379 GO:0019107	glycylpeptide N-tetradecanoyltransferase activity; myristoyltransferase activity	GO:0005737 GO:0005829 GO:0005840	cytoplasm; cytosol; ribosome
Glyma.09G065800	qESP-9-1	GO:0006979 GO:0055114	oxidation-reduction process; response to oxidative stress	GO:0004601 GO:0020037	heme binding; peroxidase activity	GO:0005576 GO:0005634 GO:0005737	cytoplasm; extracellular region; nucleus
Glyma.09G065900	qESP-9-1	GO:0006508 GO:0008152	metabolic process; proteolysis	GO:0004222 GO:0008237 GO:0008270	metalloendopeptidase activity; metallopeptidase activity; zinc ion binding	GO:0005576 GO:0031012 GO:0031225	anchored to membrane; extracellular matrix; extracellular region
Glyma.09G066000	qESP-9-1	GO:0000394 GO:0000956 GO:0006351 GO:0006366 GO:0009793	RNA splicing, via endonucleolytic cleavage and ligation; embryo development ending in seed dormancy; nuclear-transcribed mRNA catabolic process; transcription, DNA-dependent; transcription from RNA polymerase II promoter	GO:0003677 GO:0003899 GO:0032549	DNA-directed RNA polymerase activity; DNA binding; ribonucleoside binding	GO:0005634 GO:0005665 GO:0005829 GO:0009506 GO:0016591	DNA-directed RNA polymerase II, core complex; DNA-directed RNA polymerase II, holoenzyme; cytosol; nucleus; plasmodesma
Glyma.09G066100	qESP-9-1	NA	NA	NA	NA	NA	NA
Glyma.09G066200	qESP-9-1	GO:0009765 GO:0010103 GO:0016117 GO:0016120 GO:0016123	carotene biosynthetic process; carotenoid biosynthetic process; photosynthesis, light harvesting; stomatal complex morphogenesis; xanthophyll biosynthetic process	GO:0016705 GO:0045435	lycopene epsilon cyclase activity; oxidoreductase activity, acting on paired donors, with incorporation or reduction of molecular oxygen	GO:0009507	chloroplast
Glyma.09G066300	qESP-9-1	GO:0006468	protein phosphorylation	GO:0004672 GO:0004674 GO:0005524 GO:0016301 GO:0016772	ATP binding; kinase activity; protein kinase activity; protein serine/threonine kinase activity; transferase activity, transferring phosphorus-containing groups	GO:0005634	nucleus
Glyma.09G066400	qESP-9-1	NA	NA	GO:0003674	molecular function	GO:0005634	nucleus
Glyma.09G066500	qESP-9-1	GO:0000165 GO:0000303 GO:0006470 GO:0006612 GO:0006914 GO:0007154 GO:0007165 GO:0008219 GO:0009408 GO:0009409 GO:0009414 GO:0009611 GO:0009723 GO:0009733 GO:0009737 GO:0009738 GO:0009753 GO:0009787 GO:0009788 GO:0009862 GO:0009863 GO:0009867 GO:0009873 GO:0010029 GO:0010119 GO:0010363 GO:0030968 GO:0031348 GO:0042538 GO:0043069 GO:0050832	MAPK cascade; abscisic acid mediated signaling pathway; autophagy; cell communication; cell death; defense response to fungus; endoplasmic reticulum unfolded protein response; ethylene mediated signaling pathway; hyperosmotic salinity response; jasmonic acid mediated signaling pathway; negative regulation of abscisic acid mediated signaling pathway; negative regulation of defense response; negati…	GO:0003824 GO:0004722 GO:0005509 GO:0005515 GO:0019901	calcium ion binding; catalytic activity; protein binding; protein kinase binding; protein serine/threonine phosphatase activity	GO:0005634 GO:0008287	nucleus; protein serine/threonine phosphatase complex
Glyma.09G066600	qESP-9-1	GO:0000165 GO:0006096 GO:0006355 GO:0006468 GO:0006612 GO:0006833 GO:0006970 GO:0006972 GO:0007030 GO:0007154 GO:0009266 GO:0009409 GO:0009595 GO:0009617 GO:0009627 GO:0009631 GO:0009651 GO:0009697 GO:0009738 GO:0009814 GO:0009862 GO:0009863 GO:0009867 GO:0010200 GO:0010310 GO:0010363 GO:0010374 GO:0030968 GO:0031348 GO:0034976 GO:0035304 GO:0035556 GO:0042742 GO:0043069 GO:0043900 GO:0045088 GO:…	Golgi organization; MAPK cascade; abscisic acid mediated signaling pathway; cell communication; cold acclimation; defense response, incompatible interaction; defense response to bacterium; defense response to fungus; detection of biotic stimulus; endoplasmic reticulum unfolded protein response; glycolysis; hyperosmotic response; intracellular signal transduction; jasmonic acid mediated signaling …	GO:0004672 GO:0004674 GO:0004708 GO:0004713 GO:0005515 GO:0005524 GO:0016301 GO:0016772	ATP binding; MAP kinase kinase activity; kinase activity; protein binding; protein kinase activity; protein serine/threonine kinase activity; protein tyrosine kinase activity; transferase activity, transferring phosphorus-containing groups	GO:0005737 GO:0005886	cytoplasm; plasma membrane
Glyma.09G066700	qESP-9-1	GO:0008150 GO:0010260	biological process; organ senescence	NA	NA	GO:0005634	nucleus
Glyma.09G066800	qESP-9-1	GO:0006412	translation	GO:0003735	structural constituent of ribosome	GO:0005840	ribosome
Glyma.09G066900	qESP-9-1	GO:0008150	biological process	GO:0003674	molecular function	GO:0005634	nucleus
Glyma.09G067000	qESP-9-1	GO:0008150	biological process	GO:0003674	molecular function	GO:0005634	nucleus
Glyma.09G067100	qESP-9-1	GO:0008150	biological process	GO:0003674	molecular function	GO:0005634	nucleus
Glyma.09G067200	qESP-9-1	GO:0008150	biological process	GO:0003674	molecular function	GO:0005634	nucleus
Glyma.09G067300	qESP-9-1	GO:0008150	biological process	GO:0003674	molecular function	GO:0005575	cellular component
Glyma.09G067400	qESP-9-1	GO:0008150	biological process	GO:0003674	molecular function	GO:0005634	nucleus
Glyma.09G067500	qESP-9-1	GO:0000724 GO:0006260 GO:0006312 GO:0006355 GO:0007062 GO:0007129 GO:0007131 GO:0007140 GO:0007141 GO:0009220 GO:0009555 GO:0009560 GO:0009640 GO:0009793 GO:0009845 GO:0009909 GO:0009933 GO:0010162 GO:0010182 GO:0010228 GO:0010332 GO:0016444 GO:0016567 GO:0019915 GO:0032204 GO:0032504 GO:0042138 GO:0043247 GO:0043687 GO:0045132 GO:0045893 GO:0048232 GO:0050826 GO:0051026	DNA replication; chiasma assembly; double-strand break repair via homologous recombination; embryo development ending in seed dormancy; embryo sac egg cell differentiation; lipid storage; male gamete generation; male meiosis; male meiosis I; meiotic DNA double-strand break formation; meiotic chromosome segregation; meristem structural organization; mitotic recombination; multicellular organism re…	GO:0003676 GO:0003677	DNA binding; nucleic acid binding	GO:0000790 GO:0005634	nuclear chromatin; nucleus
Glyma.09G067600	qESP-9-1	GO:0009409 GO:0048610 GO:0048767 GO:0048868	cellular process involved in reproduction; pollen tube development; response to cold; root hair elongation	GO:0005509	calcium ion binding	GO:0005634 GO:0005737	cytoplasm; nucleus
Glyma.09G067700	qESP-9-1	GO:0015979	photosynthesis	GO:0003674	molecular function	GO:0009507 GO:0009523 GO:0009535 GO:0016020	chloroplast; chloroplast thylakoid membrane; membrane; photosystem II
Glyma.09G067800	qESP-9-1	GO:0006820 GO:0050982	anion transport; detection of mechanical stimulus	GO:0008381	mechanically-gated ion channel activity	GO:0005634 GO:0005886 GO:0016020	membrane; nucleus; plasma membrane
Glyma.09G067900	qESP-9-1	NA	NA	GO:0008270	zinc ion binding	GO:0005634	nucleus
Glyma.09G068000	qESP-9-1	GO:0006944 GO:0009644 GO:0010200 GO:0015031 GO:0016192 GO:0042542 GO:0048193	Golgi vesicle transport; cellular membrane fusion; protein transport; response to chitin; response to high light intensity; response to hydrogen peroxide; vesicle-mediated transport	GO:0005515	protein binding	GO:0000815 GO:0005771	ESCRT III complex; multivesicular body
Glyma.09G068100	qESP-9-1	GO:0008150 GO:0010089 GO:0044036	biological process; cell wall macromolecule metabolic process; xylem development	GO:0003674	molecular function	GO:0005634	nucleus
Glyma.09G068200	qESP-9-1	NA	NA	NA	NA	NA	NA
Glyma.09G068300	qESP-9-1	NA	NA	NA	NA	NA	NA
Glyma.09G068400	qESP-9-1	GO:0006355 GO:0045892	negative regulation of transcription, DNA-dependent; regulation of transcription, DNA-dependent	GO:0003677 GO:0003700	DNA binding; sequence-specific DNA binding transcription factor activity	GO:0005634 GO:0016602	CCAAT-binding factor complex; nucleus
Glyma.09G068500	qESP-9-1	GO:0006355	regulation of transcription, DNA-dependent	GO:0003677 GO:0008270 GO:0035064	DNA binding; methylated histone residue binding; zinc ion binding	GO:0005634	nucleus
Glyma.09G068600	qESP-9-1	GO:0000003 GO:0000398 GO:0006306 GO:0006325 GO:0006342 GO:0006346 GO:0006355 GO:0007131 GO:0008284 GO:0009630 GO:0009640 GO:0009910 GO:0010090 GO:0010388 GO:0010638 GO:0016567 GO:0016571 GO:0016572 GO:0016579 GO:0030422 GO:0031047 GO:0031048 GO:0033044 GO:0035196 GO:0043687 GO:0045893 GO:0051276 GO:0051567	DNA methylation; chromatin organization; chromatin silencing; chromatin silencing by small RNA; chromosome organization; cullin deneddylation; gene silencing by RNA; gravitropism; histone H3-K9 methylation; histone methylation; histone phosphorylation; mRNA splicing, via spliceosome; methylation-dependent chromatin silencing; negative regulation of flower development; photomorphogenesis; positive…	NA	NA	GO:0005634 GO:0016020	membrane; nucleus
Glyma.09G068700	qESP-9-1	GO:0006355 GO:0009737 GO:0009793 GO:0009845 GO:0009909 GO:0009965 GO:0010162 GO:0016570 GO:0048366 GO:0048449	embryo development ending in seed dormancy; floral organ formation; histone modification; leaf development; leaf morphogenesis; regulation of flower development; regulation of transcription, DNA-dependent; response to abscisic acid stimulus; seed dormancy process; seed germination	GO:0005524 GO:0016818	ATP binding; hydrolase activity, acting on acid anhydrides, in phosphorus-containing anhydrides	GO:0005634	nucleus
Glyma.09G068800	qESP-9-1	GO:0008150	biological process	GO:0003674	molecular function	GO:0005634	nucleus
Glyma.09G068900	qESP-9-1	NA	NA	NA	NA	NA	NA
Glyma.09G069000	qESP-9-1	GO:0000902 GO:0006816 GO:0007030 GO:0009553 GO:0009554 GO:0009556 GO:0009651 GO:0016049 GO:0048193	Golgi organization; Golgi vesicle transport; calcium ion transport; cell growth; cell morphogenesis; embryo sac development; megasporogenesis; microsporogenesis; response to salt stress	NA	NA	GO:0005634 GO:0009507	chloroplast; nucleus
Glyma.09G069100	qESP-9-1	GO:0008150	biological process	GO:0016757	transferase activity, transferring glycosyl groups	GO:0005794 GO:0009507	Golgi apparatus; chloroplast
Glyma.09G069200	qESP-9-1	GO:0008150	biological process	GO:0016757	transferase activity, transferring glycosyl groups	GO:0005794 GO:0009507	Golgi apparatus; chloroplast
Glyma.09G069300	qESP-9-1	GO:0008150	biological process	GO:0016757	transferase activity, transferring glycosyl groups	GO:0005794 GO:0009507	Golgi apparatus; chloroplast
Glyma.09G069400	qESP-9-1	GO:0008150	biological process	GO:0003674	molecular function	GO:0005634	nucleus
Glyma.09G069500	qESP-9-1	GO:0008152	metabolic process	GO:0008080	N-acetyltransferase activity	GO:0005575	cellular component
Glyma.09G069600	qESP-9-1	GO:0006464 GO:0042991	cellular protein modification process; transcription factor import into nucleus	GO:0004835	tubulin-tyrosine ligase activity	GO:0005737 GO:0009507	chloroplast; cytoplasm
Glyma.09G069700	qESP-9-1	GO:0008150	biological process	GO:0005515	protein binding	NA	NA
Glyma.09G069800	qESP-9-1	GO:0006508	proteolysis	GO:0008234	cysteine-type peptidase activity	GO:0005576	extracellular region
Glyma.09G069900	qESP-9-1	GO:0000165 GO:0006468 GO:0006499 GO:0006612 GO:0007154 GO:0009409 GO:0009414 GO:0009611 GO:0009625 GO:0009627 GO:0009697 GO:0009738 GO:0009862 GO:0009863 GO:0009867 GO:0009963 GO:0010363 GO:0016036 GO:0019375 GO:0030968 GO:0031348 GO:0042538 GO:0042631 GO:0042742 GO:0043069 GO:0045087 GO:0050832	MAPK cascade; N-terminal protein myristoylation; abscisic acid mediated signaling pathway; cell communication; cellular response to phosphate starvation; cellular response to water deprivation; defense response to bacterium; defense response to fungus; endoplasmic reticulum unfolded protein response; galactolipid biosynthetic process; hyperosmotic salinity response; innate immune response; jasmon…	GO:0004672 GO:0004674 GO:0005524 GO:0016301 GO:0016772	ATP binding; kinase activity; protein kinase activity; protein serine/threonine kinase activity; transferase activity, transferring phosphorus-containing groups	GO:0005886	plasma membrane
Glyma.09G070000	qESP-9-1	GO:0000394 GO:0006508 GO:0008152 GO:0009086 GO:0009664 GO:0009832 GO:0010075 GO:0043086 GO:0048653	RNA splicing, via endonucleolytic cleavage and ligation; anther development; metabolic process; methionine biosynthetic process; negative regulation of catalytic activity; plant-type cell wall biogenesis; plant-type cell wall organization; proteolysis; regulation of meristem growth	GO:0004252 GO:0042802	identical protein binding; serine-type endopeptidase activity	GO:0005576 GO:0005618 GO:0005794 GO:0009505 GO:0009506	Golgi apparatus; cell wall; extracellular region; plant-type cell wall; plasmodesma
Glyma.09G070100	qESP-9-1	GO:0009737	response to abscisic acid stimulus	GO:0003674	molecular function	GO:0005634 GO:0005886 GO:0045095	keratin filament; nucleus; plasma membrane
Glyma.09G070200	qESP-9-1	GO:0008150	biological process	GO:0003674	molecular function	GO:0005575	cellular component
Glyma.09G070300	qESP-9-1	GO:0000303 GO:0008152 GO:0009269 GO:0009651 GO:0009733 GO:0009737 GO:0009743 GO:0009873 GO:0015996 GO:0055114	chlorophyll catabolic process; ethylene mediated signaling pathway; metabolic process; oxidation-reduction process; response to abscisic acid stimulus; response to auxin stimulus; response to carbohydrate stimulus; response to desiccation; response to salt stress; response to superoxide	GO:0004028 GO:0016491	3-chloroallyl aldehyde dehydrogenase activity; oxidoreductase activity	GO:0005737 GO:0005829	cytoplasm; cytosol
Glyma.09G070400	qESP-9-1	GO:0009058 GO:0009821 GO:0009902 GO:0009965 GO:0010155 GO:0030154 GO:0045893 GO:0046777	alkaloid biosynthetic process; biosynthetic process; cell differentiation; chloroplast relocation; leaf morphogenesis; positive regulation of transcription, DNA-dependent; protein autophosphorylation; regulation of proton transport	GO:0016844	strictosidine synthase activity	GO:0009507	chloroplast
Glyma.09G070500	qESP-9-1	GO:0009058 GO:0009821 GO:0009902 GO:0009965 GO:0010155 GO:0030154 GO:0045893 GO:0046777	alkaloid biosynthetic process; biosynthetic process; cell differentiation; chloroplast relocation; leaf morphogenesis; positive regulation of transcription, DNA-dependent; protein autophosphorylation; regulation of proton transport	GO:0016844	strictosidine synthase activity	GO:0009507	chloroplast
Glyma.09G070600	qESP-9-1	GO:0006310 GO:0008152	DNA recombination; metabolic process	GO:0005524 GO:0008026 GO:0009378 GO:0036310 GO:0043138	3'-5' DNA helicase activity; ATP-dependent helicase activity; ATP binding; annealing helicase activity; four-way junction helicase activity	GO:0005634	nucleus
Glyma.09G070700	qESP-9-1	GO:0000023 GO:0000394 GO:0006413 GO:0009086 GO:0019252 GO:0019509 GO:0043085 GO:0044237 GO:0044249 GO:0071281 GO:0071369 GO:0071732	L-methionine salvage from methylthioadenosine; RNA splicing, via endonucleolytic cleavage and ligation; cellular biosynthetic process; cellular metabolic process; cellular response to ethylene stimulus; cellular response to iron ion; cellular response to nitric oxide; maltose metabolic process; methionine biosynthetic process; positive regulation of catalytic activity; starch biosynthetic process…	GO:0003743 GO:0005525 GO:0046523	GTP binding; S-methyl-5-thioribose-1-phosphate isomerase activity; translation initiation factor activity	GO:0005576 GO:0005634 GO:0005737 GO:0005851 GO:0009506	cytoplasm; eukaryotic translation initiation factor 2B complex; extracellular region; nucleus; plasmodesma
Glyma.09G070800	qESP-9-1	NA	NA	NA	NA	NA	NA
Glyma.09G070900	qESP-9-1	GO:0008150 GO:0009690	biological process; cytokinin metabolic process	GO:0003674	molecular function	GO:0005576 GO:0005886 GO:0016020	extracellular region; membrane; plasma membrane
Glyma.09G071000	qESP-9-1	GO:0008150 GO:0009062	biological process; fatty acid catabolic process	NA	NA	GO:0009507	chloroplast
Glyma.09G071100	qESP-9-1	GO:0008150	biological process	GO:0003674	molecular function	GO:0005575	cellular component
Glyma.09G071200	qESP-9-1	GO:0008150	biological process	GO:0003674	molecular function	GO:0005634	nucleus
Glyma.09G071300	qESP-9-1	GO:0000087 GO:0000280 GO:0000911 GO:0006275 GO:0006468 GO:0007346 GO:0008283 GO:0009755 GO:0009934 GO:0010389 GO:0042023 GO:0046777 GO:0051225	DNA endoreduplication; M phase of mitotic cell cycle; cell proliferation; cytokinesis by cell plate formation; hormone-mediated signaling pathway; nuclear division; protein autophosphorylation; protein phosphorylation; regulation of DNA replication; regulation of G2/M transition of mitotic cell cycle; regulation of meristem structural organization; regulation of mitotic cell cycle; spindle assemb…	GO:0004672 GO:0004674 GO:0004693 GO:0005515 GO:0005524 GO:0016301 GO:0016772	ATP binding; cyclin-dependent protein serine/threonine kinase activity; kinase activity; protein binding; protein kinase activity; protein serine/threonine kinase activity; transferase activity, transferring phosphorus-containing groups	GO:0005634	nucleus
Glyma.09G071400	qESP-9-1	GO:0006098 GO:0006364 GO:0009637 GO:0009644 GO:0009744 GO:0009765 GO:0010114 GO:0010155 GO:0010218 GO:0015979 GO:0019288 GO:0019761 GO:0030003 GO:0070838	cellular cation homeostasis; divalent metal ion transport; glucosinolate biosynthetic process; isopentenyl diphosphate biosynthetic process, mevalonate-independent pathway; pentose-phosphate shunt; photosynthesis; photosynthesis, light harvesting; rRNA processing; regulation of proton transport; response to blue light; response to far red light; response to high light intensity; response to red l…	GO:0016168	chlorophyll binding	GO:0009507 GO:0016020 GO:0030076	chloroplast; light-harvesting complex; membrane
Glyma.09G071500	qESP-9-1	GO:0005975	carbohydrate metabolic process	GO:0004650	polygalacturonase activity	NA	NA
Glyma.09G071600	qESP-9-1	GO:0000165 GO:0006612 GO:0007154 GO:0007165 GO:0009409 GO:0009414 GO:0009555 GO:0009611 GO:0009620 GO:0009695 GO:0009723 GO:0009733 GO:0009738 GO:0009753 GO:0009862 GO:0009863 GO:0009867 GO:0009908 GO:0010200 GO:0010363 GO:0030968 GO:0031348 GO:0035556 GO:0042538 GO:0042742 GO:0043069 GO:0050832	MAPK cascade; abscisic acid mediated signaling pathway; cell communication; defense response to bacterium; defense response to fungus; endoplasmic reticulum unfolded protein response; flower development; hyperosmotic salinity response; intracellular signal transduction; jasmonic acid biosynthetic process; jasmonic acid mediated signaling pathway; negative regulation of defense response; negative …	GO:0005515	protein binding	GO:0005634	nucleus
Glyma.09G071700	qESP-9-1	NA	NA	NA	NA	NA	NA
Glyma.09G071800	qESP-9-1	GO:0006612 GO:0006816 GO:0006833 GO:0007030 GO:0008150 GO:0009651 GO:0009750 GO:0009963 GO:0010363	Golgi organization; biological process; calcium ion transport; positive regulation of flavonoid biosynthetic process; protein targeting to membrane; regulation of plant-type hypersensitive response; response to fructose stimulus; response to salt stress; water transport	NA	NA	NA	NA
Glyma.09G071900	qESP-9-1	GO:0008150	biological process	GO:0003674	molecular function	GO:0005634 GO:0005886 GO:0009506 GO:0046658	anchored to plasma membrane; nucleus; plasma membrane; plasmodesma
Glyma.09G072000	qESP-9-1	GO:0006355 GO:0010200	regulation of transcription, DNA-dependent; response to chitin	GO:0003677 GO:0003700	DNA binding; sequence-specific DNA binding transcription factor activity	GO:0005634	nucleus
Glyma.09G072100	qESP-9-1	GO:0006094 GO:0006096 GO:0009409 GO:0009651 GO:0009658 GO:0019288 GO:0019344 GO:0046686 GO:0048481 GO:1901671	chloroplast organization; cysteine biosynthetic process; gluconeogenesis; glycolysis; isopentenyl diphosphate biosynthetic process, mevalonate-independent pathway; ovule development; positive regulation of superoxide dismutase activity; response to cadmium ion; response to cold; response to salt stress	GO:0005507 GO:0005515 GO:0005516	calmodulin binding; copper ion binding; protein binding	GO:0005737 GO:0005739 GO:0009507 GO:0009535 GO:0009536 GO:0009570 GO:0009579 GO:0009941 GO:0048046	apoplast; chloroplast; chloroplast envelope; chloroplast stroma; chloroplast thylakoid membrane; cytoplasm; mitochondrion; plastid; thylakoid
Glyma.09G072200	qESP-9-1	GO:0006355 GO:0007155 GO:0009723 GO:0009725 GO:0009733 GO:0009741 GO:0010090 GO:0010311 GO:0010583 GO:0045010 GO:0048366 GO:0048527 GO:0048765 GO:0071555	actin nucleation; cell adhesion; cell wall organization; lateral root development; lateral root formation; leaf development; regulation of transcription, DNA-dependent; response to auxin stimulus; response to brassinosteroid stimulus; response to cyclopentenone; response to ethylene stimulus; response to hormone stimulus; root hair cell differentiation; trichome morphogenesis	GO:0003677 GO:0003700 GO:0043565 GO:0046983	DNA binding; protein dimerization activity; sequence-specific DNA binding; sequence-specific DNA binding transcription factor activity	GO:0005634	nucleus
Glyma.09G072300	qESP-9-1	NA	NA	NA	NA	NA	NA
Glyma.09G072400	qESP-9-1	GO:0006312 GO:0006406 GO:0006606 GO:0006626 GO:0009560 GO:0009561 GO:0009640 GO:0010388 GO:0042991 GO:0051604	cullin deneddylation; embryo sac egg cell differentiation; mRNA export from nucleus; megagametogenesis; mitotic recombination; photomorphogenesis; protein import into nucleus; protein maturation; protein targeting to mitochondrion; transcription factor import into nucleus	GO:0003676 GO:0004386 GO:0005524 GO:0008026	ATP-dependent helicase activity; ATP binding; helicase activity; nucleic acid binding	GO:0005634	nucleus
Glyma.09G072500	qESP-9-1	GO:0006346 GO:0006468 GO:0007267 GO:0009616 GO:0009855 GO:0009887 GO:0010014 GO:0010048 GO:0010050 GO:0010051 GO:0010073 GO:0010267 GO:0016246 GO:0035196 GO:0048439 GO:0048519	RNA interference; cell-cell signaling; determination of bilateral symmetry; flower morphogenesis; meristem initiation; meristem maintenance; methylation-dependent chromatin silencing; negative regulation of biological process; organ morphogenesis; production of miRNAs involved in gene silencing by miRNA; production of ta-siRNAs involved in RNA interference; protein phosphorylation; vegetative pha…	GO:0004672 GO:0004713 GO:0005524 GO:0016301 GO:0016772	ATP binding; kinase activity; protein kinase activity; protein tyrosine kinase activity; transferase activity, transferring phosphorus-containing groups	GO:0005886	plasma membrane
Glyma.09G072600	qESP-9-1	GO:0001510 GO:0006412	RNA methylation; translation	GO:0003735	structural constituent of ribosome	GO:0005618 GO:0005622 GO:0005730 GO:0005737 GO:0005829 GO:0005840 GO:0005886 GO:0009506 GO:0016020 GO:0022626 GO:0022627	cell wall; cytoplasm; cytosol; cytosolic ribosome; cytosolic small ribosomal subunit; intracellular; membrane; nucleolus; plasma membrane; plasmodesma; ribosome
Glyma.09G072700	qESP-9-1	NA	NA	GO:0004857 GO:0030599 GO:0046910	enzyme inhibitor activity; pectinesterase activity; pectinesterase inhibitor activity	GO:0009507	chloroplast
Glyma.09G072800	qESP-9-1	NA	NA	NA	NA	NA	NA
Glyma.09G072900	qESP-9-1	GO:0008150	biological process	GO:0003674	molecular function	GO:0005634	nucleus
Glyma.09G073000	qESP-9-1	GO:0008150 GO:0009744 GO:0009813 GO:0010224 GO:0016036 GO:0019375 GO:0045892	biological process; cellular response to phosphate starvation; flavonoid biosynthetic process; galactolipid biosynthetic process; negative regulation of transcription, DNA-dependent; response to UV-B; response to sucrose stimulus	GO:0003674	molecular function	GO:0005576	extracellular region
Glyma.09G073100	qESP-9-1	NA	NA	GO:0016788	hydrolase activity, acting on ester bonds	GO:0005634	nucleus
Glyma.09G073200	qESP-9-1	GO:0006952 GO:0055114	defense response; oxidation-reduction process	GO:0004601 GO:0005506 GO:0005509 GO:0009055 GO:0016491 GO:0050660 GO:0050664	calcium ion binding; electron carrier activity; flavin adenine dinucleotide binding; iron ion binding; oxidoreductase activity; oxidoreductase activity, acting on NAD(P)H, oxygen as acceptor; peroxidase activity	GO:0005634 GO:0016020 GO:0016021	integral to membrane; membrane; nucleus
Glyma.09G073300	qESP-9-1	GO:0009733	response to auxin stimulus	GO:0005516	calmodulin binding	GO:0005634	nucleus
Glyma.09G073400	qESP-9-1	GO:0009733 GO:0016126	response to auxin stimulus; sterol biosynthetic process	GO:0003674	molecular function	GO:0005634	nucleus
Glyma.09G073500	qESP-9-1	GO:0006886 GO:0042147	intracellular protein transport; retrograde transport, endosome to Golgi	NA	NA	NA	NA
Glyma.09G073600	qESP-9-1	GO:0001666 GO:0005986 GO:0009862 GO:0010310 GO:0019375	galactolipid biosynthetic process; regulation of hydrogen peroxide metabolic process; response to hypoxia; sucrose biosynthetic process; systemic acquired resistance, salicylic acid mediated signaling pathway	GO:0008194 GO:0016157 GO:0016757	UDP-glycosyltransferase activity; sucrose synthase activity; transferase activity, transferring glycosyl groups	GO:0005773 GO:0005829 GO:0005886 GO:0016020	cytosol; membrane; plasma membrane; vacuole
Glyma.09G073700	qESP-9-1	GO:0010413 GO:0032957 GO:0045492 GO:0046855	glucuronoxylan metabolic process; inositol phosphate dephosphorylation; inositol trisphosphate metabolic process; xylan biosynthetic process	GO:0004439 GO:0042578	phosphatidylinositol-4,5-bisphosphate 5-phosphatase activity; phosphoric ester hydrolase activity	GO:0005634	nucleus
Glyma.09G073800	qESP-9-1	GO:0006629 GO:0009620 GO:0009627 GO:0009751 GO:0009817 GO:0009866 GO:0009871 GO:0042742 GO:0050832	defense response to bacterium; defense response to fungus; defense response to fungus, incompatible interaction; induced systemic resistance, ethylene mediated signaling pathway; jasmonic acid and ethylene-dependent systemic resistance, ethylene mediated signaling pathway; lipid metabolic process; response to fungus; response to salicylic acid stimulus; systemic acquired resistance	GO:0004091 GO:0016298 GO:0016788	carboxylesterase activity; hydrolase activity, acting on ester bonds; lipase activity	GO:0005576 GO:0005615	extracellular region; extracellular space
Glyma.09G073900	qESP-9-1	GO:0015979	photosynthesis	GO:0003674	molecular function	GO:0009507 GO:0009523 GO:0009535 GO:0016020	chloroplast; chloroplast thylakoid membrane; membrane; photosystem II
Glyma.09G074000	qESP-9-1	GO:0006629 GO:0006865 GO:0015824	amino acid transport; lipid metabolic process; proline transport	GO:0004091 GO:0016298 GO:0016788	carboxylesterase activity; hydrolase activity, acting on ester bonds; lipase activity	GO:0005576	extracellular region
Glyma.09G074100	qESP-9-1	GO:0008380	RNA splicing	GO:0003674	molecular function	GO:0005634	nucleus
Glyma.09G074200	qESP-9-1	NA	NA	GO:0008270	zinc ion binding	GO:0005737	cytoplasm
Glyma.09G074300	qESP-9-1	NA	NA	GO:0003677 GO:0008270	DNA binding; zinc ion binding	GO:0005622	intracellular
Glyma.09G074400	qESP-9-1	NA	NA	NA	NA	NA	NA
Glyma.09G074500	qESP-9-1	NA	NA	GO:0003824 GO:0004301	catalytic activity; epoxide hydrolase activity	GO:0005634 GO:0005829	cytosol; nucleus
Glyma.09G074600	qESP-9-1	GO:0007165 GO:0009414 GO:0009611 GO:0009723 GO:0009733 GO:0009737 GO:0009738 GO:0009753 GO:0009845 GO:0032957 GO:0042538 GO:0046854 GO:0046855 GO:0052542	abscisic acid mediated signaling pathway; defense response by callose deposition; hyperosmotic salinity response; inositol phosphate dephosphorylation; inositol trisphosphate metabolic process; phosphatidylinositol phosphorylation; response to abscisic acid stimulus; response to auxin stimulus; response to ethylene stimulus; response to jasmonic acid stimulus; response to water deprivation; respo…	GO:0004445	inositol-polyphosphate 5-phosphatase activity	GO:0005737	cytoplasm
Glyma.09G074700	qESP-9-1	NA	NA	GO:0000166 GO:0005524 GO:0016887 GO:0017111 GO:0042626	ATP binding; ATPase activity; ATPase activity, coupled to transmembrane movement of substances; nucleoside-triphosphatase activity; nucleotide binding	GO:0005634 GO:0009507 GO:0016020	chloroplast; membrane; nucleus
Glyma.09G074800	qESP-9-1	GO:0007015 GO:0009408 GO:0030036 GO:0051693	actin cytoskeleton organization; actin filament capping; actin filament organization; response to heat	GO:0003779	actin binding	GO:0005737 GO:0008290	F-actin capping protein complex; cytoplasm
Glyma.09G074900	qESP-9-1	GO:0006979 GO:0008152 GO:0009058 GO:0009411 GO:0009611 GO:0009629 GO:0009715 GO:0009718 GO:0009733 GO:0009744 GO:0009753 GO:0009813 GO:0009926 GO:0010224 GO:0031540	anthocyanin-containing compound biosynthetic process; auxin polar transport; biosynthetic process; chalcone biosynthetic process; flavonoid biosynthetic process; metabolic process; regulation of anthocyanin biosynthetic process; response to UV; response to UV-B; response to auxin stimulus; response to gravity; response to jasmonic acid stimulus; response to oxidative stress; response to sucrose s…	GO:0003824 GO:0005515 GO:0016210 GO:0016746 GO:0016747	catalytic activity; naringenin-chalcone synthase activity; protein binding; transferase activity, transferring acyl groups; transferase activity, transferring acyl groups other than amino-acyl groups	GO:0005634 GO:0005737 GO:0005783 GO:0009705	cytoplasm; endoplasmic reticulum; nucleus; plant-type vacuole membrane
Glyma.09G075000	qESP-9-1	NA	NA	GO:0004091	carboxylesterase activity	GO:0005576	extracellular region
Glyma.09G075100	qESP-9-1	GO:0008150	biological process	GO:0003723	RNA binding	GO:0005739	mitochondrion
Glyma.09G075200	qESP-9-1	GO:0006979 GO:0008152 GO:0009058 GO:0009411 GO:0009611 GO:0009629 GO:0009715 GO:0009718 GO:0009733 GO:0009744 GO:0009753 GO:0009813 GO:0009926 GO:0010224 GO:0031540	anthocyanin-containing compound biosynthetic process; auxin polar transport; biosynthetic process; chalcone biosynthetic process; flavonoid biosynthetic process; metabolic process; regulation of anthocyanin biosynthetic process; response to UV; response to UV-B; response to auxin stimulus; response to gravity; response to jasmonic acid stimulus; response to oxidative stress; response to sucrose s…	GO:0003824 GO:0005515 GO:0016210 GO:0016746 GO:0016747	catalytic activity; naringenin-chalcone synthase activity; protein binding; transferase activity, transferring acyl groups; transferase activity, transferring acyl groups other than amino-acyl groups	GO:0005634 GO:0005737 GO:0005783 GO:0009705	cytoplasm; endoplasmic reticulum; nucleus; plant-type vacuole membrane
Glyma.09G075300	qESP-9-1	GO:0008152	metabolic process	GO:0003824 GO:0016746 GO:0016747	catalytic activity; transferase activity, transferring acyl groups; transferase activity, transferring acyl groups other than amino-acyl groups	GO:0009507	chloroplast
Glyma.09G075400	qESP-9-1	GO:0006457 GO:0030968	endoplasmic reticulum unfolded protein response; protein folding	GO:0031072 GO:0051082	heat shock protein binding; unfolded protein binding	GO:0005739 GO:0005783 GO:0005794 GO:0005886 GO:0009507 GO:0030176	Golgi apparatus; chloroplast; endoplasmic reticulum; integral to endoplasmic reticulum membrane; mitochondrion; plasma membrane
Glyma.09G075500	qESP-9-1	GO:0006952 GO:0007165	defense response; signal transduction	GO:0000166 GO:0017111 GO:0043531	ADP binding; nucleoside-triphosphatase activity; nucleotide binding	GO:0005622	intracellular
Glyma.09G075600	qESP-9-1	GO:0008150	biological process	GO:0003674	molecular function	GO:0005634	nucleus
Glyma.09G075700	qESP-9-1	GO:0006499 GO:0006810 GO:0006886 GO:0016192	N-terminal protein myristoylation; intracellular protein transport; transport; vesicle-mediated transport	NA	NA	GO:0005829 GO:0009506 GO:0016020 GO:0030131	clathrin adaptor complex; cytosol; membrane; plasmodesma
Glyma.09G075800	qESP-9-1	GO:0008150	biological process	GO:0003674	molecular function	GO:0005634	nucleus
Glyma.09G075900	qESP-9-1	GO:0008150	biological process	GO:0003674	molecular function	GO:0005634	nucleus
Glyma.09G076000	qESP-9-1	GO:0042545	cell wall modification	GO:0004857 GO:0030599	enzyme inhibitor activity; pectinesterase activity	GO:0005576 GO:0005618 GO:0009505	cell wall; extracellular region; plant-type cell wall
Glyma.09G076100	qESP-9-1	GO:0042545	cell wall modification	GO:0004857 GO:0030599	enzyme inhibitor activity; pectinesterase activity	GO:0005618 GO:0009505	cell wall; plant-type cell wall
Glyma.09G076200	qESP-9-1	GO:0042545	cell wall modification	GO:0004857 GO:0030599	enzyme inhibitor activity; pectinesterase activity	GO:0005576 GO:0005618 GO:0009505	cell wall; extracellular region; plant-type cell wall
Glyma.09G076300	qESP-9-1	GO:0006094 GO:0007010 GO:0008150 GO:0010498	biological process; cytoskeleton organization; gluconeogenesis; proteasomal protein catabolic process	NA	NA	GO:0005634 GO:0005829 GO:0005886 GO:0009507	chloroplast; cytosol; nucleus; plasma membrane
Glyma.09G076400	qESP-9-1	NA	NA	GO:0016740 GO:0016747	transferase activity; transferase activity, transferring acyl groups other than amino-acyl groups	GO:0005737	cytoplasm
Glyma.09G076500	qESP-9-1	GO:0000076 GO:0000278 GO:0000724 GO:0000731 GO:0000911 GO:0003002 GO:0006260 GO:0006261 GO:0006269 GO:0006270 GO:0006271 GO:0006275 GO:0006306 GO:0007155 GO:0008283 GO:0009910 GO:0009965 GO:0010090 GO:0010389 GO:0033043 GO:0042023 GO:0045010 GO:0048449 GO:0051567 GO:0051726	DNA-dependent DNA replication; DNA endoreduplication; DNA methylation; DNA replication; DNA replication, synthesis of RNA primer; DNA replication checkpoint; DNA replication initiation; DNA strand elongation involved in DNA replication; DNA synthesis involved in DNA repair; actin nucleation; cell adhesion; cell proliferation; cytokinesis by cell plate formation; double-strand break repair via hom…	GO:0000166 GO:0001882 GO:0003676 GO:0003677 GO:0003887	DNA-directed DNA polymerase activity; DNA binding; nucleic acid binding; nucleoside binding; nucleotide binding	GO:0005634 GO:0005658	alpha DNA polymerase:primase complex; nucleus
Glyma.09G076600	qESP-9-1	GO:0006865 GO:0015824 GO:0042545	amino acid transport; cell wall modification; proline transport	GO:0004857 GO:0030599	enzyme inhibitor activity; pectinesterase activity	GO:0005618 GO:0009505	cell wall; plant-type cell wall
Glyma.09G076700	qESP-9-1	GO:0055114	oxidation-reduction process	GO:0005506 GO:0009055 GO:0016705 GO:0019825 GO:0020037	electron carrier activity; heme binding; iron ion binding; oxidoreductase activity, acting on paired donors, with incorporation or reduction of molecular oxygen; oxygen binding	GO:0005575	cellular component
Glyma.09G076800	qESP-9-1	GO:0006355	regulation of transcription, DNA-dependent	GO:0003700 GO:0008270 GO:0043565	sequence-specific DNA binding; sequence-specific DNA binding transcription factor activity; zinc ion binding	GO:0005634	nucleus
Glyma.09G076900	qESP-9-1	GO:0000023 GO:0019252 GO:0019288	isopentenyl diphosphate biosynthetic process, mevalonate-independent pathway; maltose metabolic process; starch biosynthetic process	GO:0003674	molecular function	GO:0005634 GO:0009507	chloroplast; nucleus
Glyma.09G077000	qESP-9-1	NA	NA	GO:0016788	hydrolase activity, acting on ester bonds	GO:0005634	nucleus
Glyma.09G077100	qESP-9-1	GO:0006865 GO:0015824 GO:0042545	amino acid transport; cell wall modification; proline transport	GO:0004857 GO:0030599	enzyme inhibitor activity; pectinesterase activity	GO:0005618 GO:0009505	cell wall; plant-type cell wall
Glyma.09G077200	qESP-9-1	NA	NA	NA	NA	NA	NA
Glyma.09G077300	qESP-9-1	NA	NA	NA	NA	NA	NA
Glyma.09G077400	qESP-9-1	NA	NA	GO:0016791	phosphatase activity	NA	NA
Glyma.09G077500	qESP-9-1	GO:0006612 GO:0008150 GO:0009611 GO:0009867 GO:0009963 GO:0010363	biological process; jasmonic acid mediated signaling pathway; positive regulation of flavonoid biosynthetic process; protein targeting to membrane; regulation of plant-type hypersensitive response; response to wounding	GO:0005515	protein binding	GO:0005634	nucleus
Glyma.09G077600	qESP-9-1	GO:0006412 GO:0007389 GO:0008361 GO:0009664 GO:0009832 GO:0009926 GO:0010015 GO:0010075 GO:0040007 GO:0042254 GO:0048653	anther development; auxin polar transport; growth; pattern specification process; plant-type cell wall biogenesis; plant-type cell wall organization; regulation of cell size; regulation of meristem growth; ribosome biogenesis; root morphogenesis; translation	GO:0003735	structural constituent of ribosome	GO:0005622 GO:0005840 GO:0009507 GO:0009570 GO:0009941	chloroplast; chloroplast envelope; chloroplast stroma; intracellular; ribosome
Glyma.09G077700	qESP-9-1	GO:0008150	biological process	GO:0003674	molecular function	NA	NA
Glyma.09G077800	qESP-9-1	GO:0008150	biological process	GO:0003677 GO:0046983	DNA binding; protein dimerization activity	GO:0005634	nucleus
Glyma.09G077900	qESP-9-1	GO:0008150	biological process	GO:0000166	nucleotide binding	GO:0005634 GO:0080008	CUL4-RING ubiquitin ligase complex; nucleus
Glyma.09G078000	qESP-9-1	GO:0008150	biological process	GO:0003674	molecular function	GO:0005634	nucleus
Glyma.09G078100	qESP-9-1	GO:0008150	biological process	GO:0003674	molecular function	GO:0005634 GO:0009506	nucleus; plasmodesma
Glyma.09G078200	qESP-9-1	GO:0008150	biological process	GO:0003674	molecular function	GO:0005634	nucleus
Glyma.09G078300	qESP-9-1	GO:0008150	biological process	NA	NA	NA	NA
Glyma.09G078400	qESP-9-1	GO:0008150	biological process	GO:0003674	molecular function	GO:0005575	cellular component
Glyma.09G078500	qESP-9-1	NA	NA	NA	NA	NA	NA
Glyma.09G078600	qESP-9-1	NA	NA	NA	NA	NA	NA
Glyma.09G078700	qESP-9-1	GO:0006863	purine nucleobase transport	GO:0008514	organic anion transmembrane transporter activity	GO:0005794 GO:0005886	Golgi apparatus; plasma membrane
Glyma.09G078800	qESP-9-1	GO:0008150	biological process	GO:0003674	molecular function	GO:0005575	cellular component
Glyma.09G078900	qESP-9-1	GO:0008150	biological process	GO:0003674	molecular function	NA	NA
Glyma.09G079000	qESP-9-1	GO:0030003 GO:0046777 GO:0070838	cellular cation homeostasis; divalent metal ion transport; protein autophosphorylation	GO:0004740 GO:0005524 GO:0009927 GO:0042803	ATP binding; histidine phosphotransfer kinase activity; protein homodimerization activity; pyruvate dehydrogenase (acetyl-transferring) kinase activity	GO:0005739	mitochondrion
Glyma.09G079100	qESP-9-1	GO:0008150	biological process	GO:0003677 GO:0046983	DNA binding; protein dimerization activity	GO:0005634	nucleus
Glyma.09G079200	qESP-9-1	NA	NA	NA	NA	NA	NA
Glyma.09G079300	qESP-9-1	NA	NA	NA	NA	NA	NA
Glyma.09G079400	qESP-9-1	GO:0006468 GO:0006970 GO:0007165 GO:0009651 GO:0009737 GO:0010118 GO:0019722	calcium-mediated signaling; protein phosphorylation; response to abscisic acid stimulus; response to osmotic stress; response to salt stress; signal transduction; stomatal movement	GO:0004672 GO:0004674 GO:0004713 GO:0005515 GO:0005524 GO:0016301 GO:0016772	ATP binding; kinase activity; protein binding; protein kinase activity; protein serine/threonine kinase activity; protein tyrosine kinase activity; transferase activity, transferring phosphorus-containing groups	GO:0005886	plasma membrane
Glyma.09G079500	qESP-9-1	GO:0008150	biological process	GO:0008253	5'-nucleotidase activity	GO:0009507 GO:0009570	chloroplast; chloroplast stroma
Glyma.09G079600	qESP-9-1	GO:0008150	biological process	NA	NA	GO:0009507	chloroplast
Glyma.09G079700	qESP-9-1	GO:0009627 GO:0009697 GO:0009863 GO:0031347 GO:0031348 GO:0042742 GO:0045087 GO:0060548	defense response to bacterium; innate immune response; negative regulation of cell death; negative regulation of defense response; regulation of defense response; salicylic acid biosynthetic process; salicylic acid mediated signaling pathway; systemic acquired resistance	GO:0004672 GO:0005515 GO:0016301 GO:0033612	kinase activity; protein binding; protein kinase activity; receptor serine/threonine kinase binding	GO:0005886 GO:0009506	plasma membrane; plasmodesma
Glyma.09G079800	qESP-9-1	GO:0006281 GO:0006284 GO:0006306 GO:0006349 GO:0009793	DNA methylation; DNA repair; base-excision repair; embryo development ending in seed dormancy; regulation of gene expression by genetic imprinting	GO:0003824 GO:0003906 GO:0004519 GO:0019104 GO:0051539	4 iron, 4 sulfur cluster binding; DNA-(apurinic or apyrimidinic site) lyase activity; DNA N-glycosylase activity; catalytic activity; endonuclease activity	GO:0005634 GO:0043078	nucleus; polar nucleus
Glyma.09G079900	qESP-9-1	GO:0006096 GO:0006508 GO:0006623 GO:0006629 GO:0006833 GO:0006972 GO:0007030 GO:0009266 GO:0009651 GO:0046686 GO:0048513	Golgi organization; glycolysis; hyperosmotic response; lipid metabolic process; organ development; protein targeting to vacuole; proteolysis; response to cadmium ion; response to salt stress; response to temperature stimulus; water transport	GO:0004175 GO:0004190	aspartic-type endopeptidase activity; endopeptidase activity	GO:0005576 GO:0005773 GO:0005829 GO:0009506	cytosol; extracellular region; plasmodesma; vacuole
Glyma.09G080000	qESP-9-1	GO:0006355 GO:0045892	negative regulation of transcription, DNA-dependent; regulation of transcription, DNA-dependent	GO:0003700 GO:0043565	sequence-specific DNA binding; sequence-specific DNA binding transcription factor activity	GO:0005634	nucleus
Glyma.09G080100	qESP-9-1	GO:0009061 GO:0009218 GO:0019690 GO:0019692	anaerobic respiration; deoxyribose phosphate metabolic process; pyrimidine deoxyribonucleoside interconversion; pyrimidine ribonucleotide metabolic process	GO:0003824 GO:0008270 GO:0016787	catalytic activity; hydrolase activity; zinc ion binding	GO:0005829 GO:0009507	chloroplast; cytosol
Glyma.09G080200	qESP-9-1	GO:0008150	biological process	GO:0003674	molecular function	GO:0005634	nucleus
Glyma.09G080300	qESP-9-1	GO:0008150	biological process	GO:0003674	molecular function	GO:0009507	chloroplast
Glyma.09G080400	qESP-9-1	GO:0008150	biological process	GO:0003674	molecular function	GO:0009507 GO:0009536 GO:0009941	chloroplast; chloroplast envelope; plastid
Glyma.09G080500	qESP-9-1	GO:0042372	phylloquinone biosynthetic process	GO:0016788 GO:0047617	acyl-CoA hydrolase activity; hydrolase activity, acting on ester bonds	GO:0005777 GO:0009507	chloroplast; peroxisome
Glyma.09G080600	qESP-9-1	GO:0000956 GO:0006402 GO:0006635 GO:0009791 GO:0010072 GO:0016441 GO:0016558 GO:0031087 GO:0044265	cellular macromolecule catabolic process; deadenylation-independent decapping of nuclear-transcribed mRNA; fatty acid beta-oxidation; mRNA catabolic process; nuclear-transcribed mRNA catabolic process; post-embryonic development; posttranscriptional gene silencing; primary shoot apical meristem specification; protein import into peroxisome matrix	GO:0000287 GO:0003729 GO:0005515 GO:0016787 GO:0030145 GO:0042803 GO:0050072	hydrolase activity; m7G(5')pppN diphosphatase activity; mRNA binding; magnesium ion binding; manganese ion binding; protein binding; protein homodimerization activity	GO:0000932 GO:0005634 GO:0005737	cytoplasm; cytoplasmic mRNA processing body; nucleus
Glyma.09G080700	qESP-9-1	GO:0008150	biological process	GO:0003674	molecular function	GO:0005634	nucleus
Glyma.09G080800	qESP-9-1	GO:0008150	biological process	GO:0003674	molecular function	GO:0005634	nucleus
Glyma.09G080900	qESP-9-1	GO:0008150	biological process	GO:0003674	molecular function	GO:0005886	plasma membrane
Glyma.09G081000	qESP-9-1	GO:0009407 GO:0010200 GO:0010583 GO:0042744 GO:0046482 GO:0055114	hydrogen peroxide catabolic process; oxidation-reduction process; para-aminobenzoic acid metabolic process; response to chitin; response to cyclopentenone; toxin catabolic process	GO:0009055 GO:0016491 GO:0050660	electron carrier activity; flavin adenine dinucleotide binding; oxidoreductase activity	GO:0005737 GO:0005794	Golgi apparatus; cytoplasm
Glyma.09G081100	qESP-9-1	GO:0008150	biological process	GO:0003674	molecular function	GO:0005634	nucleus
Glyma.09G081200	qESP-9-1	NA	NA	NA	NA	NA	NA
Glyma.09G081300	qESP-9-1	NA	NA	NA	NA	NA	NA
Glyma.09G081400	qESP-9-1	GO:0009567 GO:0010183 GO:0048235	double fertilization forming a zygote and endosperm; pollen sperm cell differentiation; pollen tube guidance	NA	NA	GO:0005783 GO:0005886	endoplasmic reticulum; plasma membrane
Glyma.09G081500	qESP-9-1	NA	NA	NA	NA	NA	NA
Glyma.09G081600	qESP-9-1	GO:0009567 GO:0010183 GO:0048235	double fertilization forming a zygote and endosperm; pollen sperm cell differentiation; pollen tube guidance	NA	NA	GO:0005783 GO:0005886	endoplasmic reticulum; plasma membrane
Glyma.09G081700	qESP-9-1	NA	NA	GO:0008270	zinc ion binding	GO:0005634 GO:0005737	cytoplasm; nucleus
Glyma.09G081800	qESP-9-1	GO:0006468 GO:0046777	protein autophosphorylation; protein phosphorylation	GO:0004672 GO:0004674 GO:0005524 GO:0016301 GO:0016772	ATP binding; kinase activity; protein kinase activity; protein serine/threonine kinase activity; transferase activity, transferring phosphorus-containing groups	GO:0005886	plasma membrane
Glyma.09G081900	qESP-9-1	GO:0046786	viral replication complex formation and maintenance	NA	NA	GO:0005739	mitochondrion
Glyma.09G082000	qESP-9-1	GO:0006355 GO:0032880 GO:0042744	hydrogen peroxide catabolic process; regulation of protein localization; regulation of transcription, DNA-dependent	GO:0003677 GO:0003700	DNA binding; sequence-specific DNA binding transcription factor activity	GO:0005634	nucleus
Glyma.09G082100	qESP-9-1	GO:0009553 GO:0009555 GO:0009790 GO:0009793 GO:0048868	embryo development; embryo development ending in seed dormancy; embryo sac development; pollen development; pollen tube development	GO:0019843	rRNA binding	GO:0005739 GO:0009507	chloroplast; mitochondrion
Glyma.09G082200	qESP-9-1	NA	NA	NA	NA	GO:0009507 GO:0016020 GO:0016021	chloroplast; integral to membrane; membrane
Glyma.09G082300	qESP-9-1	GO:0000911 GO:0006508 GO:0008152 GO:0043086	cytokinesis by cell plate formation; metabolic process; negative regulation of catalytic activity; proteolysis	GO:0004252 GO:0042802	identical protein binding; serine-type endopeptidase activity	GO:0005576 GO:0005618	cell wall; extracellular region
Glyma.09G082400	qESP-9-1	GO:0000394 GO:0008150 GO:0009086 GO:0048573	RNA splicing, via endonucleolytic cleavage and ligation; biological process; methionine biosynthetic process; photoperiodism, flowering	GO:0005516	calmodulin binding	GO:0005634 GO:0005886	nucleus; plasma membrane
Glyma.09G082500	qESP-9-1	GO:0008150	biological process	GO:0003674	molecular function	GO:0005575	cellular component
Glyma.09G082600	qESP-9-1	GO:0008150	biological process	GO:0003674	molecular function	GO:0009507	chloroplast
Glyma.09G082700	qESP-9-1	GO:0008150	biological process	GO:0003674	molecular function	GO:0005634	nucleus
Glyma.09G082800	qESP-9-1	NA	NA	NA	NA	NA	NA
Glyma.09G082900	qESP-9-1	GO:0008152	metabolic process	GO:0016757 GO:0016758 GO:0035251 GO:0080043 GO:0080044	UDP-glucosyltransferase activity; quercetin 3-O-glucosyltransferase activity; quercetin 7-O-glucosyltransferase activity; transferase activity, transferring glycosyl groups; transferase activity, transferring hexosyl groups	GO:0005575	cellular component
Glyma.09G083000	qESP-9-1	NA	NA	NA	NA	NA	NA
Glyma.09G083100	qESP-9-1	GO:0006886	intracellular protein transport	GO:0005215	transporter activity	GO:0005783 GO:0005794 GO:0005886	Golgi apparatus; endoplasmic reticulum; plasma membrane
Glyma.09G083200	qESP-9-1	GO:0008150	biological process	GO:0003674	molecular function	NA	NA
Glyma.09G083300	qESP-9-1	GO:0006355 GO:0048573	photoperiodism, flowering; regulation of transcription, DNA-dependent	GO:0003700 GO:0032453	histone demethylase activity (H3-K4 specific); sequence-specific DNA binding transcription factor activity	GO:0005634	nucleus
Glyma.09G083400	qESP-9-1	GO:0008150	biological process	GO:0005515	protein binding	GO:0005576	extracellular region
Glyma.09G083500	qESP-9-1	GO:0000303 GO:0001666 GO:0002240 GO:0006914 GO:0008219 GO:0009626 GO:0009651 GO:0009733 GO:0009737 GO:0009743 GO:0009751 GO:0009862 GO:0009863 GO:0009873 GO:0010104 GO:0010310 GO:0010602 GO:0010618 GO:0043067 GO:0043069	aerenchyma formation; autophagy; cell death; ethylene mediated signaling pathway; negative regulation of programmed cell death; plant-type hypersensitive response; regulation of 1-aminocyclopropane-1-carboxylate metabolic process; regulation of ethylene mediated signaling pathway; regulation of hydrogen peroxide metabolic process; regulation of programmed cell death; response to abscisic acid sti…	GO:0003700 GO:0005515	protein binding; sequence-specific DNA binding transcription factor activity	GO:0005576	extracellular region
Glyma.09G083600	qESP-9-1	NA	NA	NA	NA	NA	NA
Glyma.09G083700	qESP-9-1	GO:0000226 GO:0000911 GO:0006260 GO:0006306 GO:0008283 GO:0015031 GO:0016192 GO:0016572 GO:0051567	DNA methylation; DNA replication; cell proliferation; cytokinesis by cell plate formation; histone H3-K9 methylation; histone phosphorylation; microtubule cytoskeleton organization; protein transport; vesicle-mediated transport	GO:0005515	protein binding	GO:0000815 GO:0005634	ESCRT III complex; nucleus
Glyma.09G083800	qESP-9-1	GO:0042147	retrograde transport, endosome to Golgi	NA	NA	GO:0005794 GO:0009507	Golgi apparatus; chloroplast
Glyma.09G083900	qESP-9-1	GO:0008150	biological process	GO:0046983	protein dimerization activity	NA	NA
Glyma.09G084000	qESP-9-1	NA	NA	NA	NA	NA	NA
Glyma.09G084100	qESP-9-1	GO:0042147	retrograde transport, endosome to Golgi	NA	NA	GO:0005794 GO:0009507	Golgi apparatus; chloroplast
Glyma.09G084200	qESP-9-1	NA	NA	NA	NA	NA	NA
Glyma.09G084300	qESP-9-1	GO:0007155 GO:0009733 GO:0010014 GO:0010090 GO:0010102 GO:0016049 GO:0045010 GO:0045595 GO:0048589 GO:0048765 GO:0071555	actin nucleation; cell adhesion; cell growth; cell wall organization; developmental growth; lateral root morphogenesis; meristem initiation; regulation of cell differentiation; response to auxin stimulus; root hair cell differentiation; trichome morphogenesis	NA	NA	GO:0005634 GO:0005886 GO:0009506	nucleus; plasma membrane; plasmodesma
Glyma.09G084400	qESP-9-1	NA	NA	NA	NA	NA	NA
Glyma.09G084500	qESP-9-1	GO:0007155 GO:0009733 GO:0010014 GO:0010090 GO:0010102 GO:0016049 GO:0045010 GO:0045595 GO:0048589 GO:0048765 GO:0071555	actin nucleation; cell adhesion; cell growth; cell wall organization; developmental growth; lateral root morphogenesis; meristem initiation; regulation of cell differentiation; response to auxin stimulus; root hair cell differentiation; trichome morphogenesis	NA	NA	GO:0005634 GO:0005886 GO:0009506	nucleus; plasma membrane; plasmodesma
Glyma.09G084600	qESP-9-1	GO:0001510 GO:0006364 GO:0006406 GO:0006606 GO:0009220 GO:0009553	RNA methylation; embryo sac development; mRNA export from nucleus; protein import into nucleus; pyrimidine ribonucleotide biosynthetic process; rRNA processing	GO:0000166	nucleotide binding	GO:0005634 GO:0005730 GO:0080008	CUL4-RING ubiquitin ligase complex; nucleolus; nucleus
Glyma.09G084700	qESP-9-1	GO:0003333 GO:0006612 GO:0006820 GO:0006862 GO:0006865 GO:0006888 GO:0006944 GO:0009407 GO:0010363 GO:0010583 GO:0015696 GO:0015802 GO:0015824 GO:0043069 GO:0043090 GO:0043091 GO:0043269 GO:0051938	ER to Golgi vesicle-mediated transport; L-arginine import; L-glutamate import; amino acid import; amino acid transmembrane transport; amino acid transport; ammonium transport; anion transport; basic amino acid transport; cellular membrane fusion; negative regulation of programmed cell death; nucleotide transport; proline transport; protein targeting to membrane; regulation of ion transport; regul…	GO:0005313 GO:0015171 GO:0015181 GO:0015189 GO:0015326	L-glutamate transmembrane transporter activity; L-lysine transmembrane transporter activity; amino acid transmembrane transporter activity; arginine transmembrane transporter activity; cationic amino acid transmembrane transporter activity	GO:0005737 GO:0005886 GO:0016020	cytoplasm; membrane; plasma membrane
Glyma.09G084800	qESP-9-1	GO:0016458 GO:0051604 GO:0080111	DNA demethylation; gene silencing; protein maturation	GO:0000166 GO:0003676 GO:0003723	RNA binding; nucleic acid binding; nucleotide binding	GO:0005634	nucleus
Glyma.09G084900	qESP-9-1	GO:0000038 GO:0006869 GO:0042335	cuticle development; lipid transport; very long-chain fatty acid metabolic process	GO:0008289	lipid binding	GO:0005576 GO:0009535	chloroplast thylakoid membrane; extracellular region
Glyma.09G085000	qESP-9-1	GO:0006499	N-terminal protein myristoylation	NA	NA	GO:0005634	nucleus
Glyma.09G085100	qESP-9-1	GO:0008150	biological process	GO:0046983	protein dimerization activity	GO:0005634 GO:0009506	nucleus; plasmodesma
Glyma.09G085200	qESP-9-1	GO:0009416	response to light stimulus	GO:0004871	signal transducer activity	GO:0005886	plasma membrane
Glyma.09G085300	qESP-9-1	GO:0006810 GO:0006811 GO:0006812 GO:0055085	cation transport; ion transport; transmembrane transport; transport	GO:0008511 GO:0015377	cation:chloride symporter activity; sodium:potassium:chloride symporter activity	GO:0005768 GO:0005794 GO:0005802 GO:0005886 GO:0016020 GO:0016021	Golgi apparatus; endosome; integral to membrane; membrane; plasma membrane; trans-Golgi network
Glyma.09G085400	qESP-9-1	GO:0006486	protein glycosylation	GO:0008378 GO:0016757	galactosyltransferase activity; transferase activity, transferring glycosyl groups	GO:0005576 GO:0016020	extracellular region; membrane
Glyma.09G085500	qESP-9-1	GO:0005975	carbohydrate metabolic process	GO:0004650	polygalacturonase activity	GO:0005576	extracellular region
Glyma.09G085600	qESP-9-1	GO:0008150	biological process	GO:0003674	molecular function	GO:0009507 GO:0016020	chloroplast; membrane
Glyma.09G085700	qESP-9-1	GO:0008150	biological process	GO:0003674	molecular function	GO:0005634	nucleus
Glyma.09G085800	qESP-9-1	NA	NA	NA	NA	NA	NA
Glyma.09G085900	qESP-9-1	NA	NA	GO:0016788	hydrolase activity, acting on ester bonds	GO:0005575	cellular component
Glyma.09G086000	qESP-9-1	GO:0008150	biological process	GO:0003674	molecular function	GO:0005634	nucleus
Glyma.09G086100	qESP-9-1	GO:0000023 GO:0009073 GO:0009637 GO:0009793 GO:0010155 GO:0016226 GO:0016556 GO:0019252 GO:0019761 GO:0046777	aromatic amino acid family biosynthetic process; embryo development ending in seed dormancy; glucosinolate biosynthetic process; iron-sulfur cluster assembly; mRNA modification; maltose metabolic process; protein autophosphorylation; regulation of proton transport; response to blue light; starch biosynthetic process	GO:0003674	molecular function	GO:0009507	chloroplast
Glyma.09G086200	qESP-9-1	NA	NA	GO:0000166 GO:0005515	nucleotide binding; protein binding	GO:0005730 GO:0005737 GO:0005834 GO:0080008	CUL4-RING ubiquitin ligase complex; cytoplasm; heterotrimeric G-protein complex; nucleolus
Glyma.09G086300	qESP-9-1	NA	NA	NA	NA	NA	NA
Glyma.09G086400	qESP-9-1	NA	NA	NA	NA	NA	NA
Glyma.09G086500	qESP-9-1	GO:0008150	biological process	GO:0003674	molecular function	GO:0005634	nucleus
Glyma.09G086600	qESP-9-1	GO:0008150	biological process	NA	NA	GO:0005739	mitochondrion
Glyma.09G086700	qESP-9-1	GO:0006355 GO:0009410 GO:0009738 GO:0030968 GO:0045893	abscisic acid mediated signaling pathway; endoplasmic reticulum unfolded protein response; positive regulation of transcription, DNA-dependent; regulation of transcription, DNA-dependent; response to xenobiotic stimulus	GO:0003677 GO:0003700 GO:0033613 GO:0043565 GO:0046983	DNA binding; activating transcription factor binding; protein dimerization activity; sequence-specific DNA binding; sequence-specific DNA binding transcription factor activity	GO:0005634	nucleus
Glyma.09G086800	qESP-9-1	GO:0055114	oxidation-reduction process	GO:0003756 GO:0016671 GO:0050660	flavin adenine dinucleotide binding; oxidoreductase activity, acting on a sulfur group of donors, disulfide as acceptor; protein disulfide isomerase activity	GO:0005634 GO:0005783 GO:0005789	endoplasmic reticulum; endoplasmic reticulum membrane; nucleus
Glyma.09G086900	qESP-9-1	NA	NA	NA	NA	NA	NA
Glyma.09G087000	qESP-9-1	GO:0045454	cell redox homeostasis	GO:0009055 GO:0015035	electron carrier activity; protein disulfide oxidoreductase activity	NA	NA
Glyma.09G087100	qESP-9-1	GO:0008152 GO:0009698	metabolic process; phenylpropanoid metabolic process	GO:0003824 GO:0016207	4-coumarate-CoA ligase activity; catalytic activity	NA	NA
Glyma.09G087200	qESP-9-1	GO:0006810 GO:0006863 GO:0015798 GO:0023052 GO:0055085	myo-inositol transport; purine nucleobase transport; signaling; transmembrane transport; transport	GO:0005215 GO:0005351 GO:0005366 GO:0015144 GO:0022857 GO:0022891	carbohydrate transmembrane transporter activity; myo-inositol:hydrogen symporter activity; substrate-specific transmembrane transporter activity; sugar:hydrogen symporter activity; transmembrane transporter activity; transporter activity	GO:0005886 GO:0016020 GO:0016021 GO:0090406	integral to membrane; membrane; plasma membrane; pollen tube
Glyma.09G087300	qESP-9-1	NA	NA	NA	NA	NA	NA
Glyma.09G087400	qESP-9-1	GO:0006810 GO:0006863 GO:0015798 GO:0023052 GO:0055085	myo-inositol transport; purine nucleobase transport; signaling; transmembrane transport; transport	GO:0005215 GO:0005351 GO:0005366 GO:0015144 GO:0022857 GO:0022891	carbohydrate transmembrane transporter activity; myo-inositol:hydrogen symporter activity; substrate-specific transmembrane transporter activity; sugar:hydrogen symporter activity; transmembrane transporter activity; transporter activity	GO:0005886 GO:0016020 GO:0016021 GO:0090406	integral to membrane; membrane; plasma membrane; pollen tube
Glyma.09G087500	qESP-9-1	GO:0008150	biological process	GO:0003674	molecular function	GO:0005576	extracellular region
Glyma.09G087600	qESP-9-1	GO:0008150	biological process	GO:0003674	molecular function	GO:0005634 GO:0016020	membrane; nucleus
Glyma.09G087700	qESP-9-1	GO:0015979 GO:0019344 GO:0030003 GO:0070838	cellular cation homeostasis; cysteine biosynthetic process; divalent metal ion transport; photosynthesis	GO:0003674	molecular function	GO:0009507 GO:0009522 GO:0009534 GO:0009535 GO:0009579 GO:0016020	chloroplast; chloroplast thylakoid; chloroplast thylakoid membrane; membrane; photosystem I; thylakoid
Glyma.09G087800	qESP-9-1	GO:0008150	biological process	GO:0003674	molecular function	GO:0005634	nucleus
Glyma.09G087900	qESP-9-1	GO:0000278 GO:0000956 GO:0006396 GO:0006412 GO:0009630 GO:0019344	RNA processing; cysteine biosynthetic process; gravitropism; mitotic cell cycle; nuclear-transcribed mRNA catabolic process; translation	GO:0003723	RNA binding	GO:0005737	cytoplasm
Glyma.09G088000	qESP-9-1	NA	NA	NA	NA	GO:0005739	mitochondrion
Glyma.09G088100	qESP-9-1	GO:0005982 GO:0005987 GO:0048825	cotyledon development; starch metabolic process; sucrose catabolic process	GO:0003824 GO:0004564 GO:0004575	beta-fructofuranosidase activity; catalytic activity; sucrose alpha-glucosidase activity	GO:0009507	chloroplast
Glyma.09G088200	qESP-9-1	NA	NA	NA	NA	NA	NA
Glyma.09G088300	qESP-9-1	GO:0006470 GO:0006888 GO:0009610 GO:0043090	ER to Golgi vesicle-mediated transport; amino acid import; protein dephosphorylation; response to symbiotic fungus	GO:0008420 GO:0016791	CTD phosphatase activity; phosphatase activity	GO:0005634	nucleus
Glyma.09G088400	qESP-9-1	NA	NA	NA	NA	NA	NA
Glyma.09G088500	qESP-9-1	GO:0006346 GO:0006355 GO:0007165 GO:0009584 GO:0009585 GO:0010155 GO:0016246 GO:0017006 GO:0018106 GO:0018298 GO:0046777	RNA interference; detection of visible light; methylation-dependent chromatin silencing; peptidyl-histidine phosphorylation; protein-chromophore linkage; protein-tetrapyrrole linkage; protein autophosphorylation; red, far-red light phototransduction; regulation of proton transport; regulation of transcription, DNA-dependent; signal transduction	GO:0000155 GO:0004673 GO:0004871 GO:0005515 GO:0005524 GO:0008020 GO:0009881 GO:0042803	ATP binding; G-protein coupled photoreceptor activity; phosphorelay sensor kinase activity; photoreceptor activity; protein binding; protein histidine kinase activity; protein homodimerization activity; signal transducer activity	GO:0016020	membrane
Glyma.09G088600	qESP-9-1	GO:0008150	biological process	GO:0003674	molecular function	GO:0031225	anchored to membrane
Glyma.09G088700	qESP-9-1	GO:0006635 GO:0016558 GO:0045836 GO:0045927	fatty acid beta-oxidation; positive regulation of growth; positive regulation of meiosis; protein import into peroxisome matrix	GO:0000166 GO:0003676 GO:0003723	RNA binding; nucleic acid binding; nucleotide binding	GO:0005634	nucleus
Glyma.09G088800	qESP-9-1	GO:0008150 GO:0009741	biological process; response to brassinosteroid stimulus	GO:0003674	molecular function	NA	NA
Glyma.09G088900	qESP-9-1	GO:0009791	post-embryonic development	GO:0003677 GO:0046983	DNA binding; protein dimerization activity	GO:0005634 GO:0005829	cytosol; nucleus
Glyma.09G089000	qESP-9-1	GO:0008150	biological process	GO:0003674	molecular function	GO:0005886	plasma membrane
Glyma.09G089100	qESP-9-1	GO:0006278	RNA-dependent DNA replication	GO:0003676 GO:0003723 GO:0003964	RNA-directed DNA polymerase activity; RNA binding; nucleic acid binding	GO:0005739	mitochondrion
Glyma.09G089200	qESP-9-1	NA	NA	NA	NA	GO:0005739	mitochondrion
Glyma.09G089300	qESP-9-1	GO:0009639	response to red or far red light	GO:0008270	zinc ion binding	GO:0005634	nucleus
Glyma.09G089400	qESP-9-1	GO:0008150	biological process	GO:0003674	molecular function	GO:0005634	nucleus
Glyma.09G089500	qESP-9-1	NA	NA	GO:0031072	heat shock protein binding	GO:0005737	cytoplasm
Glyma.09G089600	qESP-9-1	GO:0008150	biological process	GO:0003674	molecular function	GO:0009507	chloroplast
Glyma.09G089700	qESP-9-1	GO:0000911 GO:0006468 GO:0007165 GO:0007584 GO:0009414 GO:0009723 GO:0009738 GO:0010107 GO:0010118 GO:0016036 GO:0019375 GO:0019722 GO:0035556 GO:0042631	abscisic acid mediated signaling pathway; calcium-mediated signaling; cellular response to phosphate starvation; cellular response to water deprivation; cytokinesis by cell plate formation; galactolipid biosynthetic process; intracellular signal transduction; potassium ion import; protein phosphorylation; response to ethylene stimulus; response to nutrient; response to water deprivation; signal t…	GO:0004672 GO:0004674 GO:0005515 GO:0005524 GO:0016301 GO:0016772	ATP binding; kinase activity; protein binding; protein kinase activity; protein serine/threonine kinase activity; transferase activity, transferring phosphorus-containing groups	GO:0005634 GO:0005737 GO:0005829 GO:0005886 GO:0009536	cytoplasm; cytosol; nucleus; plasma membrane; plastid
Glyma.09G089800	qESP-9-1	GO:0008150	biological process	GO:0003676 GO:0008270	nucleic acid binding; zinc ion binding	GO:0005634	nucleus
Glyma.09G089900	qESP-9-1	GO:0006351	transcription, DNA-dependent	GO:0003677 GO:0003899	DNA-directed RNA polymerase activity; DNA binding	GO:0005634 GO:0009507	chloroplast; nucleus
Glyma.09G090000	qESP-9-1	NA	NA	NA	NA	NA	NA
Glyma.09G090100	qESP-9-1	GO:0006091 GO:0006354 GO:0009768 GO:0015979 GO:0019684	DNA-dependent transcription, elongation; generation of precursor metabolites and energy; photosynthesis; photosynthesis, light harvesting in photosystem I; photosynthesis, light reaction	GO:0016168	chlorophyll binding	GO:0009507 GO:0009522 GO:0009534 GO:0009535 GO:0009538 GO:0009579 GO:0009941 GO:0010287 GO:0016020 GO:0016021	chloroplast; chloroplast envelope; chloroplast thylakoid; chloroplast thylakoid membrane; integral to membrane; membrane; photosystem I; photosystem I reaction center; plastoglobule; thylakoid
Glyma.09G090200	qESP-9-1	GO:0008150	biological process	GO:0003674	molecular function	GO:0005794 GO:0016020	Golgi apparatus; membrane
Glyma.09G090300	qESP-9-1	GO:0008150	biological process	GO:0003674	molecular function	GO:0009507	chloroplast
Glyma.09G090400	qESP-9-1	GO:0006952 GO:0009627 GO:0009697	defense response; salicylic acid biosynthetic process; systemic acquired resistance	GO:0005515 GO:0043531	ADP binding; protein binding	GO:0005576	extracellular region
Glyma.09G090500	qESP-9-1	GO:0006952 GO:0009627 GO:0009697	defense response; salicylic acid biosynthetic process; systemic acquired resistance	GO:0005515 GO:0043531	ADP binding; protein binding	GO:0005576	extracellular region
Glyma.09G090600	qESP-9-1	NA	NA	NA	NA	NA	NA
Glyma.09G090700	qESP-9-1	NA	NA	NA	NA	NA	NA
Glyma.09G090800	qESP-9-1	NA	NA	NA	NA	NA	NA
Glyma.09G090900	qESP-9-1	GO:0006457	protein folding	GO:0003755	peptidyl-prolyl cis-trans isomerase activity	GO:0005737 GO:0005773 GO:0005829 GO:0005886	cytoplasm; cytosol; plasma membrane; vacuole
Glyma.09G091000	qESP-9-1	GO:0006096 GO:0006511 GO:0009060 GO:0009853 GO:0046686 GO:0051788 GO:0080129	aerobic respiration; glycolysis; photorespiration; proteasome core complex assembly; response to cadmium ion; response to misfolded protein; ubiquitin-dependent protein catabolic process	GO:0003824	catalytic activity	GO:0005739 GO:0005747 GO:0016020	membrane; mitochondrial respiratory chain complex I; mitochondrion
Glyma.09G091100	qESP-9-1	NA	NA	GO:0004566 GO:0016798	beta-glucuronidase activity; hydrolase activity, acting on glycosyl bonds	GO:0005576 GO:0009505 GO:0016020	extracellular region; membrane; plant-type cell wall
Glyma.09G091200	qESP-9-1	GO:0008150	biological process	NA	NA	GO:0005739	mitochondrion
Glyma.09G091300	qESP-9-1	GO:0008150	biological process	GO:0003674	molecular function	GO:0005634	nucleus
Glyma.09G091400	qESP-9-1	NA	NA	NA	NA	NA	NA
Glyma.09G091500	qESP-9-1	NA	NA	NA	NA	NA	NA
Glyma.09G091600	qESP-9-1	GO:0006457 GO:0009408 GO:0009644 GO:0009651 GO:0030244 GO:0030433 GO:0034976 GO:0042542 GO:0048193	ER-associated protein catabolic process; Golgi vesicle transport; cellulose biosynthetic process; protein folding; response to endoplasmic reticulum stress; response to heat; response to high light intensity; response to hydrogen peroxide; response to salt stress	NA	NA	GO:0005783	endoplasmic reticulum
Glyma.09G091700	qESP-9-1	NA	NA	NA	NA	GO:0005634	nucleus
Glyma.09G091800	qESP-9-1	GO:0008150	biological process	GO:0003674	molecular function	GO:0005575	cellular component
Glyma.09G091900	qESP-9-1	GO:0080167	response to karrikin	GO:0003674	molecular function	GO:0005634	nucleus
Glyma.09G092000	qESP-9-1	GO:0008150 GO:0009909 GO:0016570 GO:0034968 GO:0048449	biological process; floral organ formation; histone lysine methylation; histone modification; regulation of flower development	GO:0005515	protein binding	GO:0005634 GO:0005635 GO:0005783	endoplasmic reticulum; nuclear envelope; nucleus
Glyma.09G092100	qESP-9-1	GO:0008150	biological process	GO:0003674	molecular function	GO:0005634	nucleus
Glyma.09G092200	qESP-9-1	GO:0008150	biological process	GO:0046983	protein dimerization activity	GO:0005634 GO:0009506	nucleus; plasmodesma
Glyma.09G092300	qESP-9-1	GO:0008150	biological process	GO:0003674	molecular function	NA	NA
Glyma.09G092400	qESP-9-1	GO:0008150	biological process	GO:0003674	molecular function	GO:0005634	nucleus
Glyma.09G092500	qESP-9-1	GO:0006355 GO:0009723 GO:0009751 GO:0010200 GO:0048527	lateral root development; regulation of transcription, DNA-dependent; response to chitin; response to ethylene stimulus; response to salicylic acid stimulus	GO:0003677 GO:0003700 GO:0005515	DNA binding; protein binding; sequence-specific DNA binding transcription factor activity	GO:0005634	nucleus
Glyma.09G092600	qESP-9-1	GO:0000911 GO:0006275 GO:0006346 GO:0008150 GO:0009909 GO:0009957 GO:0010389 GO:0016458 GO:0031048 GO:0034968 GO:0051567	biological process; chromatin silencing by small RNA; cytokinesis by cell plate formation; epidermal cell fate specification; gene silencing; histone H3-K9 methylation; histone lysine methylation; methylation-dependent chromatin silencing; regulation of DNA replication; regulation of G2/M transition of mitotic cell cycle; regulation of flower development	GO:0003674	molecular function	GO:0005634	nucleus
Glyma.09G092700	qESP-9-1	GO:0006869	lipid transport	NA	NA	GO:0005575	cellular component
Glyma.09G092800	qESP-9-1	GO:0006457 GO:0009408 GO:0009644 GO:0010167 GO:0015706 GO:0034976 GO:0042542	nitrate transport; protein folding; response to endoplasmic reticulum stress; response to heat; response to high light intensity; response to hydrogen peroxide; response to nitrate	GO:0004866	endopeptidase inhibitor activity	GO:0005576 GO:0005618 GO:0048046	apoplast; cell wall; extracellular region
Glyma.09G092900	qESP-9-1	GO:0006355 GO:0009739 GO:0009751 GO:0010200	regulation of transcription, DNA-dependent; response to chitin; response to gibberellin stimulus; response to salicylic acid stimulus	GO:0003677 GO:0003700	DNA binding; sequence-specific DNA binding transcription factor activity	GO:0005634	nucleus
Glyma.09G093000	qESP-9-1	NA	NA	NA	NA	NA	NA
Glyma.09G093100	qESP-9-1	GO:0008150	biological process	GO:0003676 GO:0008270	nucleic acid binding; zinc ion binding	GO:0005634	nucleus
Glyma.09G093200	qESP-9-1	NA	NA	NA	NA	NA	NA
Glyma.09G093300	qESP-9-1	GO:0000394 GO:0006661 GO:0008150 GO:0009086	RNA splicing, via endonucleolytic cleavage and ligation; biological process; methionine biosynthetic process; phosphatidylinositol biosynthetic process	GO:0003674	molecular function	GO:0005739	mitochondrion
Glyma.09G093400	qESP-9-1	GO:0008150	biological process	GO:0003674	molecular function	GO:0005576 GO:0009506	extracellular region; plasmodesma
Glyma.09G093500	qESP-9-1	NA	NA	NA	NA	NA	NA
Glyma.09G093600	qESP-9-1	GO:0008150	biological process	GO:0003674	molecular function	GO:0005575	cellular component
Glyma.09G093700	qESP-9-1	GO:0009639	response to red or far red light	GO:0008270	zinc ion binding	GO:0005634	nucleus
Glyma.09G093800	qESP-9-1	GO:0009626 GO:0009627 GO:0009870 GO:0010204 GO:0042742 GO:0050832 GO:0051707 GO:0055114 GO:0071456	cellular response to hypoxia; defense response signaling pathway, resistance gene-dependent; defense response signaling pathway, resistance gene-independent; defense response to bacterium; defense response to fungus; oxidation-reduction process; plant-type hypersensitive response; response to other organism; systemic acquired resistance	GO:0004497 GO:0004499 GO:0016491 GO:0050660 GO:0050661	N,N-dimethylaniline monooxygenase activity; NADP binding; flavin adenine dinucleotide binding; monooxygenase activity; oxidoreductase activity	GO:0009507 GO:0031227	chloroplast; intrinsic to endoplasmic reticulum membrane
Glyma.09G093900	qESP-9-1	GO:0008152 GO:0080167	metabolic process; response to karrikin	GO:0008168	methyltransferase activity	GO:0009507 GO:0010287	chloroplast; plastoglobule
Glyma.09G094000	qESP-9-1	GO:0009626 GO:0009627 GO:0009870 GO:0010204 GO:0042742 GO:0050832 GO:0051707 GO:0055114 GO:0071456	cellular response to hypoxia; defense response signaling pathway, resistance gene-dependent; defense response signaling pathway, resistance gene-independent; defense response to bacterium; defense response to fungus; oxidation-reduction process; plant-type hypersensitive response; response to other organism; systemic acquired resistance	GO:0004497 GO:0004499 GO:0016491 GO:0050660 GO:0050661	N,N-dimethylaniline monooxygenase activity; NADP binding; flavin adenine dinucleotide binding; monooxygenase activity; oxidoreductase activity	GO:0009507 GO:0031227	chloroplast; intrinsic to endoplasmic reticulum membrane
Glyma.09G094100	qESP-9-1	NA	NA	NA	NA	NA	NA
Glyma.09G094200	qESP-9-1	GO:0006412	translation	GO:0003735	structural constituent of ribosome	GO:0005622 GO:0005737 GO:0005840 GO:0016020 GO:0022627	cytoplasm; cytosolic small ribosomal subunit; intracellular; membrane; ribosome
Glyma.09G094300	qESP-9-1	GO:0006412	translation	GO:0003735	structural constituent of ribosome	GO:0005622 GO:0005737 GO:0005840 GO:0016020 GO:0022627	cytoplasm; cytosolic small ribosomal subunit; intracellular; membrane; ribosome
Glyma.09G094400	qESP-9-1	NA	NA	GO:0008168 GO:0008171 GO:0046983	O-methyltransferase activity; methyltransferase activity; protein dimerization activity	GO:0005829	cytosol
Glyma.09G094500	qESP-9-1	NA	NA	NA	NA	NA	NA
Glyma.09G094600	qESP-9-1	NA	NA	GO:0008168 GO:0008171 GO:0046983	O-methyltransferase activity; methyltransferase activity; protein dimerization activity	GO:0005829	cytosol
Glyma.09G094700	qESP-9-1	NA	NA	NA	NA	NA	NA
Glyma.09G094800	qESP-9-1	GO:0006412	translation	GO:0003735	structural constituent of ribosome	GO:0005622 GO:0005840 GO:0022625	cytosolic large ribosomal subunit; intracellular; ribosome
Glyma.09G094900	qESP-9-1	GO:0006944 GO:0008150 GO:0048193	Golgi vesicle transport; biological process; cellular membrane fusion	GO:0003674	molecular function	GO:0005634	nucleus
Glyma.09G095000	qESP-9-1	NA	NA	NA	NA	NA	NA
Glyma.09G095100	qESP-9-1	GO:0005975 GO:0005990 GO:0006499 GO:0009311 GO:0016139 GO:0046477	N-terminal protein myristoylation; carbohydrate metabolic process; glycoside catabolic process; glycosylceramide catabolic process; lactose catabolic process; oligosaccharide metabolic process	GO:0003824 GO:0004553 GO:0004557	alpha-galactosidase activity; catalytic activity; hydrolase activity, hydrolyzing O-glycosyl compounds	GO:0005576 GO:0005618 GO:0005737 GO:0009505	cell wall; cytoplasm; extracellular region; plant-type cell wall
Glyma.09G095200	qESP-9-1	GO:0009739	response to gibberellin stimulus	GO:0003674	molecular function	GO:0005576	extracellular region
Glyma.09G095300	qESP-9-1	GO:0006606 GO:0006886 GO:0009407	intracellular protein transport; protein import into nucleus; toxin catabolic process	GO:0008565	protein transporter activity	GO:0005634 GO:0005730 GO:0005737 GO:0005829 GO:0009506	cytoplasm; cytosol; nucleolus; nucleus; plasmodesma
Glyma.09G095400	qESP-9-1	GO:0006457 GO:0018119	peptidyl-cysteine S-nitrosylation; protein folding	GO:0003755	peptidyl-prolyl cis-trans isomerase activity	GO:0009507 GO:0031977	chloroplast; thylakoid lumen
Glyma.09G095500	qESP-9-1	GO:0006457 GO:0018119	peptidyl-cysteine S-nitrosylation; protein folding	GO:0003755	peptidyl-prolyl cis-trans isomerase activity	GO:0009507 GO:0031977	chloroplast; thylakoid lumen
Glyma.09G095600	qESP-9-1	GO:0006457 GO:0009408 GO:0009644 GO:0034976 GO:0042542	protein folding; response to endoplasmic reticulum stress; response to heat; response to high light intensity; response to hydrogen peroxide	GO:0001671 GO:0051087	ATPase activator activity; chaperone binding	GO:0005634 GO:0005829	cytosol; nucleus
Glyma.09G095700	qESP-9-1	GO:0006355 GO:0009416 GO:0009722 GO:0048513 GO:0071345	cellular response to cytokine stimulus; detection of cytokinin stimulus; organ development; regulation of transcription, DNA-dependent; response to light stimulus	GO:0003677 GO:0003700 GO:0005515 GO:0043565	DNA binding; protein binding; sequence-specific DNA binding; sequence-specific DNA binding transcription factor activity	GO:0005634 GO:0005829	cytosol; nucleus
Glyma.09G095800	qESP-9-1	GO:0008150	biological process	GO:0003674	molecular function	GO:0005575	cellular component
Glyma.09G095900	qESP-9-1	GO:0006468 GO:0009644 GO:0042542	protein phosphorylation; response to high light intensity; response to hydrogen peroxide	GO:0004672 GO:0004674 GO:0004712 GO:0005524 GO:0016772	ATP binding; protein kinase activity; protein serine/threonine/tyrosine kinase activity; protein serine/threonine kinase activity; transferase activity, transferring phosphorus-containing groups	GO:0005634	nucleus
Glyma.09G096000	qESP-9-1	GO:0007165	signal transduction	GO:0004672	protein kinase activity	GO:0005886	plasma membrane
Glyma.09G096100	qESP-9-1	GO:0008150	biological process	GO:0005516	calmodulin binding	GO:0005634 GO:0005886	nucleus; plasma membrane
Glyma.09G096200	qESP-9-1	GO:0008150	biological process	GO:0003674	molecular function	GO:0005634	nucleus
Glyma.09G096300	qESP-9-1	NA	NA	GO:0008270	zinc ion binding	GO:0005634 GO:0005739	mitochondrion; nucleus
Glyma.09G096400	qESP-9-1	NA	NA	NA	NA	NA	NA
Glyma.09G096500	qESP-9-1	GO:0008643 GO:0015706 GO:0055062 GO:0055085	carbohydrate transport; nitrate transport; phosphate ion homeostasis; transmembrane transport	GO:0005351	sugar:hydrogen symporter activity	GO:0009507 GO:0016021	chloroplast; integral to membrane
Glyma.09G096600	qESP-9-1	GO:0006470 GO:0050688	protein dephosphorylation; regulation of defense response to virus	GO:0003824 GO:0004722	catalytic activity; protein serine/threonine phosphatase activity	GO:0005634 GO:0005737 GO:0005829	cytoplasm; cytosol; nucleus
Glyma.09G096700	qESP-9-1	NA	NA	NA	NA	GO:0005739 GO:0005768 GO:0005794 GO:0005802 GO:0016021	Golgi apparatus; endosome; integral to membrane; mitochondrion; trans-Golgi network
Glyma.09G096800	qESP-9-1	GO:0006139 GO:0006354 GO:0009061 GO:0009117 GO:0015979 GO:0046939	DNA-dependent transcription, elongation; anaerobic respiration; nucleobase-containing compound metabolic process; nucleotide metabolic process; nucleotide phosphorylation; photosynthesis	GO:0004017 GO:0005524 GO:0016776 GO:0019201 GO:0019205	ATP binding; adenylate kinase activity; nucleobase-containing compound kinase activity; nucleotide kinase activity; phosphotransferase activity, phosphate group as acceptor	GO:0009507 GO:0009534 GO:0009535 GO:0009941	chloroplast; chloroplast envelope; chloroplast thylakoid; chloroplast thylakoid membrane
Glyma.09G096900	qESP-9-1	NA	NA	NA	NA	NA	NA
Glyma.09G097000	qESP-9-1	NA	NA	NA	NA	NA	NA
Glyma.09G097100	qESP-9-1	GO:0006810 GO:0055085	transmembrane transport; transport	GO:0005215 GO:0005351 GO:0015144 GO:0022857 GO:0022891	carbohydrate transmembrane transporter activity; substrate-specific transmembrane transporter activity; sugar:hydrogen symporter activity; transmembrane transporter activity; transporter activity	GO:0005886 GO:0016020	membrane; plasma membrane
Glyma.09G097200	qESP-9-1	GO:0008150	biological process	GO:0003674	molecular function	GO:0005739	mitochondrion
Glyma.09G097300	qESP-9-1	GO:0009855 GO:0009926 GO:0010014 GO:0010073 GO:0048451 GO:0048453 GO:0055085	auxin polar transport; determination of bilateral symmetry; meristem initiation; meristem maintenance; petal formation; sepal formation; transmembrane transport	GO:0005215 GO:0009672	auxin:hydrogen symporter activity; transporter activity	GO:0005886 GO:0016021	integral to membrane; plasma membrane
Glyma.09G097400	qESP-9-1	GO:0000302 GO:0006145 GO:0009414 GO:0042554 GO:0046110 GO:0055114	oxidation-reduction process; purine nucleobase catabolic process; response to reactive oxygen species; response to water deprivation; superoxide anion generation; xanthine metabolic process	GO:0003824 GO:0004854 GO:0005506 GO:0008762 GO:0009055 GO:0016491 GO:0016614 GO:0046872 GO:0050660 GO:0051536 GO:0051537	2 iron, 2 sulfur cluster binding; UDP-N-acetylmuramate dehydrogenase activity; catalytic activity; electron carrier activity; flavin adenine dinucleotide binding; iron-sulfur cluster binding; iron ion binding; metal ion binding; oxidoreductase activity; oxidoreductase activity, acting on CH-OH group of donors; xanthine dehydrogenase activity	GO:0005829	cytosol
Glyma.09G097500	qESP-9-1	GO:0006468 GO:0007169 GO:2000604	negative regulation of secondary growth; protein phosphorylation; transmembrane receptor protein tyrosine kinase signaling pathway	GO:0004672 GO:0004674 GO:0005524 GO:0016301 GO:0016772	ATP binding; kinase activity; protein kinase activity; protein serine/threonine kinase activity; transferase activity, transferring phosphorus-containing groups	GO:0005886	plasma membrane
Glyma.09G097600	qESP-9-1	GO:0006397 GO:0008150 GO:0008284 GO:0009630	biological process; gravitropism; mRNA processing; positive regulation of cell proliferation	GO:0003723 GO:0005515	RNA binding; protein binding	GO:0005634	nucleus
Glyma.09G097700	qESP-9-1	GO:0006623 GO:0006810 GO:0006944 GO:0007030 GO:0007033 GO:0007067 GO:0016192 GO:0048193	Golgi organization; Golgi vesicle transport; cellular membrane fusion; mitosis; protein targeting to vacuole; transport; vacuole organization; vesicle-mediated transport	GO:0003674	molecular function	GO:0005634 GO:0005794 GO:0005829	Golgi apparatus; cytosol; nucleus
Glyma.09G097800	qESP-9-1	NA	NA	NA	NA	GO:0005739	mitochondrion
Glyma.09G097900	qESP-9-1	GO:0008150	biological process	NA	NA	GO:0005576	extracellular region
Glyma.09G098000	qESP-9-1	GO:0006468 GO:0007165 GO:0007275 GO:0009414 GO:0009651 GO:0010118 GO:0010540 GO:0019722 GO:0042538	basipetal auxin transport; calcium-mediated signaling; hyperosmotic salinity response; multicellular organismal development; protein phosphorylation; response to salt stress; response to water deprivation; signal transduction; stomatal movement	GO:0004672 GO:0004674 GO:0005515 GO:0005524 GO:0016301 GO:0016772	ATP binding; kinase activity; protein binding; protein kinase activity; protein serine/threonine kinase activity; transferase activity, transferring phosphorus-containing groups	GO:0005886	plasma membrane
Glyma.09G098100	qESP-9-1	GO:0000911 GO:0006260 GO:0006270 GO:0006275 GO:0006306 GO:0006342 GO:0006346 GO:0007059 GO:0007067 GO:0007129 GO:0007131 GO:0008283 GO:0009909 GO:0010267 GO:0010389 GO:0010564 GO:0016458 GO:0016570 GO:0031047 GO:0031048 GO:0034968 GO:0035196 GO:0048449 GO:0051276 GO:0051567 GO:0051607 GO:0051726	DNA methylation; DNA replication; DNA replication initiation; cell proliferation; chromatin silencing; chromatin silencing by small RNA; chromosome organization; chromosome segregation; cytokinesis by cell plate formation; defense response to virus; floral organ formation; gene silencing; gene silencing by RNA; histone H3-K9 methylation; histone lysine methylation; histone modification; methylati…	GO:0005215 GO:0005524	ATP binding; transporter activity	GO:0005634 GO:0005694	chromosome; nucleus
Glyma.09G098200	qESP-9-1	GO:0006817 GO:0008150 GO:0016036	biological process; cellular response to phosphate starvation; phosphate ion transport	GO:0003674	molecular function	GO:0005886 GO:0016021	integral to membrane; plasma membrane
Glyma.09G098300	qESP-9-1	GO:0006355 GO:0080147	regulation of transcription, DNA-dependent; root hair cell development	GO:0003677 GO:0003700	DNA binding; sequence-specific DNA binding transcription factor activity	GO:0005634	nucleus
Glyma.09G098400	qESP-9-1	GO:0006355 GO:0009553 GO:0009555 GO:0009733 GO:0009751 GO:0042542	embryo sac development; pollen development; regulation of transcription, DNA-dependent; response to auxin stimulus; response to hydrogen peroxide; response to salicylic acid stimulus	GO:0003712 GO:0004402 GO:0005515 GO:0005516 GO:0008270	calmodulin binding; histone acetyltransferase activity; protein binding; transcription cofactor activity; zinc ion binding	GO:0005634 GO:0005737	cytoplasm; nucleus
Glyma.09G098500	qESP-9-1	GO:0008150	biological process	GO:0003674	molecular function	GO:0005634	nucleus
Glyma.09G098600	qESP-9-1	GO:0009735 GO:0009736 GO:0010082 GO:0010380 GO:0031537 GO:0048364 GO:0048367 GO:0071368 GO:0080022 GO:0080113	cellular response to cytokinin stimulus; cytokinin mediated signaling pathway; primary root development; regulation of anthocyanin metabolic process; regulation of chlorophyll biosynthetic process; regulation of root meristem growth; regulation of seed growth; response to cytokinin stimulus; root development; shoot system development	GO:0000156 GO:0003700	phosphorelay response regulator activity; sequence-specific DNA binding transcription factor activity	GO:0005634	nucleus
Glyma.09G098700	qESP-9-1	GO:0008150	biological process	GO:0005516	calmodulin binding	GO:0005634	nucleus
Glyma.09G098800	qESP-9-1	GO:0000394 GO:0008150 GO:0009086	RNA splicing, via endonucleolytic cleavage and ligation; biological process; methionine biosynthetic process	GO:0003674	molecular function	NA	NA
Glyma.09G098900	qESP-9-1	GO:0006810 GO:0009408 GO:0009409 GO:0009416 GO:0042538	hyperosmotic salinity response; response to cold; response to heat; response to light stimulus; transport	GO:0005215	transporter activity	GO:0005576 GO:0005739 GO:0005773 GO:0005774 GO:0005783 GO:0005794 GO:0005886 GO:0009506	Golgi apparatus; endoplasmic reticulum; extracellular region; mitochondrion; plasma membrane; plasmodesma; vacuolar membrane; vacuole
Glyma.09G099000	qESP-9-1	GO:0000165 GO:0006355 GO:0006612 GO:0009617 GO:0009641 GO:0009658 GO:0009718 GO:0009862 GO:0009867 GO:0010099 GO:0010310 GO:0010363 GO:0015995 GO:0031348 GO:0035304	MAPK cascade; anthocyanin-containing compound biosynthetic process; chlorophyll biosynthetic process; chloroplast organization; jasmonic acid mediated signaling pathway; negative regulation of defense response; protein targeting to membrane; regulation of hydrogen peroxide metabolic process; regulation of photomorphogenesis; regulation of plant-type hypersensitive response; regulation of protein …	GO:0003700 GO:0005515 GO:0008270	protein binding; sequence-specific DNA binding transcription factor activity; zinc ion binding	GO:0005634 GO:0016607	nuclear speck; nucleus
Glyma.09G099100	qESP-9-1	GO:0006468 GO:0048544 GO:0048765	protein phosphorylation; recognition of pollen; root hair cell differentiation	GO:0004672 GO:0004674 GO:0004713 GO:0005524 GO:0016772 GO:0030246	ATP binding; carbohydrate binding; protein kinase activity; protein serine/threonine kinase activity; protein tyrosine kinase activity; transferase activity, transferring phosphorus-containing groups	GO:0005886	plasma membrane
Glyma.09G099200	qESP-9-1	GO:0006468 GO:0048544 GO:0048765	protein phosphorylation; recognition of pollen; root hair cell differentiation	GO:0004672 GO:0004674 GO:0004713 GO:0005524 GO:0016772 GO:0030246	ATP binding; carbohydrate binding; protein kinase activity; protein serine/threonine kinase activity; protein tyrosine kinase activity; transferase activity, transferring phosphorus-containing groups	GO:0005886	plasma membrane
Glyma.09G099300	qESP-9-1	GO:0007126 GO:0035825 GO:0051026	chiasma assembly; meiosis; reciprocal DNA recombination	GO:0003677	DNA binding	GO:0005634 GO:0005694	chromosome; nucleus
Glyma.09G099400	qESP-9-1	GO:0009791	post-embryonic development	GO:0003677 GO:0046983	DNA binding; protein dimerization activity	GO:0005634 GO:0005829	cytosol; nucleus
Glyma.09G099500	qESP-9-1	GO:0006812 GO:0009718 GO:0009744 GO:0010224 GO:0055085	anthocyanin-containing compound biosynthetic process; cation transport; response to UV-B; response to sucrose stimulus; transmembrane transport	GO:0008324	cation transmembrane transporter activity	GO:0016020 GO:0016021	integral to membrane; membrane
Glyma.09G099600	qESP-9-1	NA	NA	NA	NA	NA	NA
Glyma.09G099700	qESP-9-1	GO:0005975 GO:0006006 GO:0006096 GO:0009555 GO:0048658 GO:0055114 GO:0080022 GO:0080144	amino acid homeostasis; anther wall tapetum development; carbohydrate metabolic process; glucose metabolic process; glycolysis; oxidation-reduction process; pollen development; primary root development	GO:0000166 GO:0004365 GO:0005507 GO:0008270 GO:0016620 GO:0050661 GO:0051287	NADP binding; NAD binding; copper ion binding; glyceraldehyde-3-phosphate dehydrogenase (NAD+) (phosphorylating) activity; nucleotide binding; oxidoreductase activity, acting on the aldehyde or oxo group of donors, NAD or NADP as acceptor; zinc ion binding	GO:0009507 GO:0009536 GO:0016020	chloroplast; membrane; plastid
Glyma.09G099800	qESP-9-1	GO:0008150 GO:0010200	biological process; response to chitin	GO:0003674	molecular function	GO:0005634	nucleus
Glyma.09G099900	qESP-9-1	GO:0006468	protein phosphorylation	GO:0004672 GO:0004674 GO:0004713 GO:0005524 GO:0016772	ATP binding; protein kinase activity; protein serine/threonine kinase activity; protein tyrosine kinase activity; transferase activity, transferring phosphorus-containing groups	GO:0005886 GO:0016020	membrane; plasma membrane
Glyma.09G100000	qESP-9-1	NA	NA	NA	NA	NA	NA
Glyma.09G100100	qESP-9-1	GO:0008150	biological process	GO:0003674	molecular function	GO:0005575	cellular component
Glyma.09G100200	qESP-9-1	GO:0008150	biological process	GO:0003674	molecular function	GO:0005739	mitochondrion
Glyma.09G100300	qESP-9-1	NA	NA	GO:0003676 GO:0004386 GO:0005524 GO:0008026	ATP-dependent helicase activity; ATP binding; helicase activity; nucleic acid binding	GO:0005634	nucleus
Glyma.09G100400	qESP-9-1	GO:0006094	gluconeogenesis	GO:0004611 GO:0004612 GO:0005524 GO:0017076	ATP binding; phosphoenolpyruvate carboxykinase (ATP) activity; phosphoenolpyruvate carboxykinase activity; purine nucleotide binding	GO:0005737	cytoplasm
Glyma.09G100500	qESP-9-1	NA	NA	NA	NA	NA	NA
Glyma.09G100600	qESP-9-1	NA	NA	NA	NA	NA	NA
Glyma.09G100700	qESP-9-1	NA	NA	NA	NA	NA	NA
Glyma.09G100800	qESP-9-1	NA	NA	NA	NA	NA	NA
Glyma.09G100900	qESP-9-1	NA	NA	NA	NA	NA	NA
Glyma.09G101000	qESP-9-1	GO:0000162 GO:0006568 GO:0008152	metabolic process; tryptophan biosynthetic process; tryptophan metabolic process	GO:0003824 GO:0004834 GO:0030170	catalytic activity; pyridoxal phosphate binding; tryptophan synthase activity	GO:0009507 GO:0009570 GO:0009941	chloroplast; chloroplast envelope; chloroplast stroma
Glyma.09G101100	qESP-9-1	GO:0008150	biological process	NA	NA	GO:0016020	membrane
Glyma.09G101200	qESP-9-1	GO:0000398 GO:0000956 GO:0006306 GO:0006342 GO:0006355 GO:0007267 GO:0008283 GO:0008284 GO:0009616 GO:0009640 GO:0009793 GO:0009845 GO:0009909 GO:0009933 GO:0010048 GO:0010162 GO:0010182 GO:0010228 GO:0010267 GO:0016567 GO:0016569 GO:0019915 GO:0030422 GO:0031047 GO:0035196 GO:0043687 GO:0045893 GO:0048573 GO:0048638 GO:0050826	DNA methylation; cell-cell signaling; cell proliferation; chromatin silencing; covalent chromatin modification; embryo development ending in seed dormancy; gene silencing by RNA; lipid storage; mRNA splicing, via spliceosome; meristem structural organization; nuclear-transcribed mRNA catabolic process; photomorphogenesis; photoperiodism, flowering; positive regulation of cell proliferation; posit…	GO:0003674 GO:0003723 GO:0005515	RNA binding; molecular function; protein binding	GO:0005634 GO:0005829 GO:0009507	chloroplast; cytosol; nucleus
Glyma.09G101300	qESP-9-1	GO:0006863	purine nucleobase transport	NA	NA	GO:0005886 GO:0016020	membrane; plasma membrane
Glyma.09G101400	qESP-9-1	GO:0008150	biological process	GO:0003674	molecular function	GO:0005575	cellular component
Glyma.09G101500	qESP-9-1	GO:0008150	biological process	GO:0003674	molecular function	GO:0005575	cellular component
Glyma.09G101600	qESP-9-1	NA	NA	NA	NA	NA	NA
Glyma.09G101700	qESP-9-1	NA	NA	GO:0003676 GO:0004386 GO:0005524 GO:0008026	ATP-dependent helicase activity; ATP binding; helicase activity; nucleic acid binding	GO:0005634	nucleus
Glyma.09G101800	qESP-9-1	NA	NA	NA	NA	NA	NA
Glyma.09G101900	qESP-9-1	GO:0008150	biological process	GO:0003674	molecular function	GO:0005634	nucleus
Glyma.09G102000	qESP-9-1	GO:0006098 GO:0006655 GO:0019288 GO:0080167 GO:0090391	granum assembly; isopentenyl diphosphate biosynthetic process, mevalonate-independent pathway; pentose-phosphate shunt; phosphatidylglycerol biosynthetic process; response to karrikin	GO:0003674	molecular function	GO:0009507 GO:0009570	chloroplast; chloroplast stroma
Glyma.09G102100	qESP-9-1	GO:0007264 GO:0016192	small GTPase mediated signal transduction; vesicle-mediated transport	GO:0005525	GTP binding	GO:0005622 GO:0005634	intracellular; nucleus
Glyma.09G102200	qESP-9-1	GO:0007623 GO:0055114	circadian rhythm; oxidation-reduction process	GO:0005506 GO:0009055 GO:0016705 GO:0019825 GO:0020037	electron carrier activity; heme binding; iron ion binding; oxidoreductase activity, acting on paired donors, with incorporation or reduction of molecular oxygen; oxygen binding	NA	NA
Glyma.09G102300	qESP-9-1	GO:0008150	biological process	GO:0003674	molecular function	GO:0005634	nucleus
Glyma.09G102400	qESP-9-1	GO:0006952	defense response	GO:0003674	molecular function	GO:0005737	cytoplasm
Glyma.09G102500	qESP-9-1	GO:0009693 GO:0010193 GO:0010286 GO:0030968 GO:0052542	defense response by callose deposition; endoplasmic reticulum unfolded protein response; ethylene biosynthetic process; heat acclimation; response to ozone	GO:0005509	calcium ion binding	GO:0005634 GO:0005737	cytoplasm; nucleus
Glyma.09G102600	qESP-9-1	NA	NA	NA	NA	NA	NA
Glyma.09G102700	qESP-9-1	GO:0006355 GO:0007062 GO:0009630 GO:0009790 GO:0009880 GO:0010030 GO:0010072 GO:0010162 GO:0010431 GO:0010564 GO:0043687 GO:0045595 GO:0045893 GO:0048316 GO:0048366 GO:0048825 GO:0051301 GO:2000034	cell division; cotyledon development; embryo development; embryonic pattern specification; gravitropism; leaf development; positive regulation of seed germination; positive regulation of transcription, DNA-dependent; post-translational protein modification; primary shoot apical meristem specification; regulation of cell cycle process; regulation of cell differentiation; regulation of seed maturat…	GO:0003700 GO:0005515	protein binding; sequence-specific DNA binding transcription factor activity	GO:0005634	nucleus
Glyma.09G102800	qESP-9-1	GO:0006826 GO:0006855 GO:0006879 GO:0010106 GO:0010167 GO:0010413 GO:0015706 GO:0045492 GO:0055085 GO:0071281 GO:0071369 GO:0071732	cellular iron ion homeostasis; cellular response to ethylene stimulus; cellular response to iron ion; cellular response to iron ion starvation; cellular response to nitric oxide; drug transmembrane transport; glucuronoxylan metabolic process; iron ion transport; nitrate transport; response to nitrate; transmembrane transport; xylan biosynthetic process	GO:0005215 GO:0015137 GO:0015238 GO:0015297	antiporter activity; citrate transmembrane transporter activity; drug transmembrane transporter activity; transporter activity	GO:0005886 GO:0016020	membrane; plasma membrane
Glyma.09G102900	qESP-9-1	GO:0006355 GO:0006486	protein glycosylation; regulation of transcription, DNA-dependent	GO:0003676 GO:0003700 GO:0008270	nucleic acid binding; sequence-specific DNA binding transcription factor activity; zinc ion binding	GO:0005634 GO:0005737	cytoplasm; nucleus
Glyma.09G103000	qESP-9-1	GO:0000271 GO:0006096 GO:0006816 GO:0006833 GO:0006952 GO:0006972 GO:0007030 GO:0007389 GO:0008361 GO:0009266 GO:0009651 GO:0009750 GO:0009809 GO:0009825 GO:0009832 GO:0009833 GO:0009834 GO:0009926 GO:0009932 GO:0010015 GO:0010817 GO:0016049 GO:0016126 GO:0030243 GO:0030244 GO:0040007 GO:0042546 GO:0043255 GO:0043481 GO:0046686 GO:0048767 GO:0071555	Golgi organization; anthocyanin accumulation in tissues in response to UV light; auxin polar transport; calcium ion transport; cell growth; cell tip growth; cell wall biogenesis; cell wall organization; cellulose biosynthetic process; cellulose metabolic process; defense response; glycolysis; growth; hyperosmotic response; lignin biosynthetic process; multidimensional cell growth; pattern specifi…	GO:0008270 GO:0016757 GO:0016759 GO:0016760	cellulose synthase (UDP-forming) activity; cellulose synthase activity; transferase activity, transferring glycosyl groups; zinc ion binding	GO:0005768 GO:0005794 GO:0005802 GO:0005886 GO:0009506 GO:0016020	Golgi apparatus; endosome; membrane; plasma membrane; plasmodesma; trans-Golgi network
Glyma.09G103100	qESP-9-1	GO:0008150	biological process	GO:0003674	molecular function	NA	NA
Glyma.09G103200	qESP-9-1	GO:0009407 GO:0010583	response to cyclopentenone; toxin catabolic process	GO:0004364	glutathione transferase activity	GO:0005737	cytoplasm
Glyma.09G103300	qESP-9-1	GO:0032259	methylation	GO:0003676 GO:0008168	methyltransferase activity; nucleic acid binding	GO:0005737	cytoplasm
Glyma.09G103400	qESP-9-1	GO:0006412	translation	GO:0003723 GO:0003735	RNA binding; structural constituent of ribosome	GO:0005618 GO:0005622 GO:0005774 GO:0005829 GO:0005840 GO:0005886 GO:0009506 GO:0009507 GO:0015935 GO:0016020 GO:0022626 GO:0022627	cell wall; chloroplast; cytosol; cytosolic ribosome; cytosolic small ribosomal subunit; intracellular; membrane; plasma membrane; plasmodesma; ribosome; small ribosomal subunit; vacuolar membrane
Glyma.09G103500	qESP-9-1	GO:0010236 GO:0016117	carotenoid biosynthetic process; plastoquinone biosynthetic process	GO:0004161 GO:0004659 GO:0010355 GO:0010356 GO:0010357	dimethylallyltranstransferase activity; homogentisate farnesyltransferase activity; homogentisate geranylgeranyltransferase activity; homogentisate solanesyltransferase activity; prenyltransferase activity	GO:0005739 GO:0009536 GO:0009941 GO:0016021	chloroplast envelope; integral to membrane; mitochondrion; plastid
Glyma.09G103600	qESP-9-1	GO:0008150	biological process	GO:0005516	calmodulin binding	GO:0005634	nucleus
Glyma.09G103700	qESP-9-1	GO:0006351	transcription, DNA-dependent	GO:0003899	DNA-directed RNA polymerase activity	GO:0005634 GO:0005665	DNA-directed RNA polymerase II, core complex; nucleus
Glyma.09G103800	qESP-9-1	GO:0009611 GO:0015824 GO:0050832	defense response to fungus; proline transport; response to wounding	GO:0004867	serine-type endopeptidase inhibitor activity	GO:0005576 GO:0005618	cell wall; extracellular region
Glyma.09G103900	qESP-9-1	NA	NA	NA	NA	GO:0016020	membrane
Glyma.09G104000	qESP-9-1	GO:0001510 GO:0006364 GO:0006606 GO:0009553	RNA methylation; embryo sac development; protein import into nucleus; rRNA processing	GO:0003723	RNA binding	GO:0005634 GO:0005730 GO:0005886	nucleolus; nucleus; plasma membrane
Glyma.09G104100	qESP-9-1	GO:0008150	biological process	GO:0003677 GO:0046983	DNA binding; protein dimerization activity	GO:0005634	nucleus
Glyma.09G104200	qESP-9-1	GO:0000278 GO:0000398 GO:0006355 GO:0006396 GO:0008380 GO:0030422 GO:0035196 GO:0043687 GO:0045893	RNA processing; RNA splicing; mRNA splicing, via spliceosome; mitotic cell cycle; positive regulation of transcription, DNA-dependent; post-translational protein modification; production of miRNAs involved in gene silencing by miRNA; production of siRNA involved in RNA interference; regulation of transcription, DNA-dependent	GO:0003723 GO:0005515 GO:0042802	RNA binding; identical protein binding; protein binding	GO:0005634 GO:0005730 GO:0005886 GO:0016607 GO:0035061	interchromatin granule; nuclear speck; nucleolus; nucleus; plasma membrane
Glyma.09G104300	qESP-9-1	NA	NA	NA	NA	NA	NA
Glyma.09G104400	qESP-9-1	NA	NA	NA	NA	NA	NA
Glyma.09G104500	qESP-9-1	GO:0008150	biological process	GO:0003674	molecular function	GO:0005634	nucleus
Glyma.09G104600	qESP-9-1	GO:0008150	biological process	GO:0003674	molecular function	GO:0005634	nucleus
Glyma.09G104700	qESP-9-1	GO:0007020 GO:0016051	carbohydrate biosynthetic process; microtubule nucleation	GO:0008375 GO:0016757	acetylglucosaminyltransferase activity; transferase activity, transferring glycosyl groups	GO:0005794 GO:0016020	Golgi apparatus; membrane
Glyma.09G104800	qESP-9-1	GO:0009556 GO:0010584 GO:0055114	microsporogenesis; oxidation-reduction process; pollen exine formation	GO:0000166 GO:0016620 GO:0016628 GO:0080019	fatty-acyl-CoA reductase (alcohol-forming) activity; nucleotide binding; oxidoreductase activity, acting on the CH-CH group of donors, NAD or NADP as acceptor; oxidoreductase activity, acting on the aldehyde or oxo group of donors, NAD or NADP as acceptor	NA	NA
Glyma.09G104900	qESP-9-1	NA	NA	NA	NA	NA	NA
Glyma.09G105000	qESP-9-1	GO:0006470	protein dephosphorylation	GO:0004722 GO:0016787	hydrolase activity; protein serine/threonine phosphatase activity	GO:0000159 GO:0005634 GO:0005730 GO:0005737 GO:0005829	cytoplasm; cytosol; nucleolus; nucleus; protein phosphatase type 2A complex
Glyma.09G105100	qESP-9-1	GO:0008150	biological process	GO:0003677 GO:0046983	DNA binding; protein dimerization activity	GO:0005634	nucleus
Glyma.09G105200	qESP-9-1	NA	NA	NA	NA	NA	NA
Glyma.09G105300	qESP-9-1	NA	NA	GO:0003676 GO:0004386 GO:0005524 GO:0008026	ATP-dependent helicase activity; ATP binding; helicase activity; nucleic acid binding	GO:0005777	peroxisome
Glyma.09G105400	qESP-9-1	NA	NA	NA	NA	NA	NA
Glyma.09G105500	qESP-9-1	GO:0008150	biological process	NA	NA	GO:0005737 GO:0005829	cytoplasm; cytosol
Glyma.09G105600	qESP-9-1	GO:0010228	vegetative to reproductive phase transition of meristem	GO:0016787	hydrolase activity	NA	NA
Glyma.09G105700	qESP-9-1	GO:0006464 GO:0006511	cellular protein modification process; ubiquitin-dependent protein catabolic process	NA	NA	GO:0005622	intracellular
Glyma.09G105800	qESP-9-1	GO:0008150	biological process	GO:0003674	molecular function	GO:0005575	cellular component
Glyma.09G105900	qESP-9-1	NA	NA	NA	NA	NA	NA
Glyma.09G106000	qESP-9-1	GO:0008150	biological process	GO:0003674	molecular function	GO:0005634 GO:0009506	nucleus; plasmodesma
Glyma.09G106100	qESP-9-1	NA	NA	NA	NA	NA	NA
Glyma.09G106200	qESP-9-1	GO:0008150 GO:0009610 GO:0009738 GO:0046482	abscisic acid mediated signaling pathway; biological process; para-aminobenzoic acid metabolic process; response to symbiotic fungus	GO:0003674	molecular function	GO:0005773 GO:0009507	chloroplast; vacuole
Glyma.09G106300	qESP-9-1	GO:0008150 GO:0009610 GO:0009738 GO:0046482	abscisic acid mediated signaling pathway; biological process; para-aminobenzoic acid metabolic process; response to symbiotic fungus	GO:0003674	molecular function	GO:0005773 GO:0009507	chloroplast; vacuole
Glyma.09G106400	qESP-9-1	GO:0008150 GO:0009610 GO:0009738 GO:0046482	abscisic acid mediated signaling pathway; biological process; para-aminobenzoic acid metabolic process; response to symbiotic fungus	GO:0003674	molecular function	GO:0005773 GO:0009507	chloroplast; vacuole
Glyma.09G106500	qESP-9-1	GO:0008150 GO:0009610 GO:0009738 GO:0046482	abscisic acid mediated signaling pathway; biological process; para-aminobenzoic acid metabolic process; response to symbiotic fungus	GO:0003674	molecular function	GO:0005773 GO:0009507	chloroplast; vacuole
Glyma.09G106600	qESP-9-1	GO:0008150 GO:0009610 GO:0009738 GO:0046482	abscisic acid mediated signaling pathway; biological process; para-aminobenzoic acid metabolic process; response to symbiotic fungus	GO:0003674	molecular function	GO:0005773 GO:0009507	chloroplast; vacuole
Glyma.09G106700	qESP-9-1	GO:0008150 GO:0009610 GO:0009738 GO:0046482	abscisic acid mediated signaling pathway; biological process; para-aminobenzoic acid metabolic process; response to symbiotic fungus	GO:0003674	molecular function	GO:0005773 GO:0009507	chloroplast; vacuole
Glyma.09G106800	qESP-9-1	GO:0008150 GO:0009610 GO:0009738 GO:0046482	abscisic acid mediated signaling pathway; biological process; para-aminobenzoic acid metabolic process; response to symbiotic fungus	GO:0003674	molecular function	GO:0005773 GO:0009507	chloroplast; vacuole
Glyma.09G106900	qESP-9-1	GO:0008150 GO:0009610 GO:0009738 GO:0046482	abscisic acid mediated signaling pathway; biological process; para-aminobenzoic acid metabolic process; response to symbiotic fungus	GO:0003674	molecular function	GO:0005773 GO:0009507	chloroplast; vacuole
Glyma.09G107000	qESP-9-1	GO:0006355	regulation of transcription, DNA-dependent	GO:0003677 GO:0008270 GO:0035064	DNA binding; methylated histone residue binding; zinc ion binding	GO:0005634	nucleus
Glyma.09G107100	qESP-9-1	GO:0009611 GO:0009620 GO:0009695 GO:0009753 GO:0009867 GO:0055114 GO:0080167	jasmonic acid biosynthetic process; jasmonic acid mediated signaling pathway; oxidation-reduction process; response to fungus; response to jasmonic acid stimulus; response to karrikin; response to wounding	GO:0005506 GO:0016491 GO:0016706	iron ion binding; oxidoreductase activity; oxidoreductase activity, acting on paired donors, with incorporation or reduction of molecular oxygen, 2-oxoglutarate as one donor, and incorporation of one atom each of oxygen into both donors	GO:0005737	cytoplasm
Glyma.09G107200	qESP-9-1	GO:0008150	biological process	GO:0003674	molecular function	GO:0005634 GO:0016020	membrane; nucleus
Glyma.09G107300	qESP-9-1	NA	NA	NA	NA	NA	NA
Glyma.09G107400	qESP-9-1	GO:0000165 GO:0006355 GO:0006612 GO:0009617 GO:0009793 GO:0009862 GO:0009867 GO:0009965 GO:0010026 GO:0010027 GO:0010228 GO:0010310 GO:0010363 GO:0016226 GO:0030154 GO:0031348 GO:0035304 GO:0045893 GO:0048481	MAPK cascade; cell differentiation; embryo development ending in seed dormancy; iron-sulfur cluster assembly; jasmonic acid mediated signaling pathway; leaf morphogenesis; negative regulation of defense response; ovule development; positive regulation of transcription, DNA-dependent; protein targeting to membrane; regulation of hydrogen peroxide metabolic process; regulation of plant-type hyperse…	GO:0003676 GO:0003700 GO:0008270	nucleic acid binding; sequence-specific DNA binding transcription factor activity; zinc ion binding	GO:0005634	nucleus
Glyma.09G107500	qESP-9-1	NA	NA	NA	NA	NA	NA
Glyma.09G107600	qESP-9-1	GO:0006511 GO:0009407	toxin catabolic process; ubiquitin-dependent protein catabolic process	GO:0004842	ubiquitin-protein ligase activity	GO:0005634	nucleus
Glyma.09G107700	qESP-9-1	NA	NA	NA	NA	NA	NA
Glyma.09G107800	qESP-9-1	NA	NA	NA	NA	NA	NA
Glyma.09G107900	qESP-9-1	NA	NA	NA	NA	NA	NA
Glyma.09G108000	qESP-9-1	GO:0007018	microtubule-based movement	GO:0003777 GO:0005524	ATP binding; microtubule motor activity	NA	NA
Glyma.09G108100	qESP-9-1	GO:0006334	nucleosome assembly	GO:0003677	DNA binding	GO:0000786 GO:0005634	nucleosome; nucleus
Glyma.09G108200	qESP-9-1	GO:0008150	biological process	GO:0003674	molecular function	GO:0005634	nucleus
Glyma.09G108300	qESP-9-1	NA	NA	NA	NA	NA	NA
Glyma.09G108400	qESP-9-1	GO:0006412 GO:0019288 GO:0019344	cysteine biosynthetic process; isopentenyl diphosphate biosynthetic process, mevalonate-independent pathway; translation	GO:0003735 GO:0008266	poly(U) RNA binding; structural constituent of ribosome	GO:0000311 GO:0005634 GO:0005840 GO:0009507 GO:0009535 GO:0009547 GO:0009570 GO:0009579 GO:0016020 GO:0022626	chloroplast; chloroplast stroma; chloroplast thylakoid membrane; cytosolic ribosome; membrane; nucleus; plastid large ribosomal subunit; plastid ribosome; ribosome; thylakoid
Glyma.09G108500	qESP-9-1	GO:0001510 GO:0006412	RNA methylation; translation	GO:0003735	structural constituent of ribosome	GO:0005622 GO:0005730 GO:0005737 GO:0005829 GO:0005840 GO:0005886 GO:0009506 GO:0022625 GO:0022626	cytoplasm; cytosol; cytosolic large ribosomal subunit; cytosolic ribosome; intracellular; nucleolus; plasma membrane; plasmodesma; ribosome
Glyma.09G108600	qESP-9-1	GO:0000079 GO:0000724 GO:0010389 GO:0051726	double-strand break repair via homologous recombination; regulation of G2/M transition of mitotic cell cycle; regulation of cell cycle; regulation of cyclin-dependent protein serine/threonine kinase activity	GO:0005515 GO:0016538 GO:0019901	cyclin-dependent protein serine/threonine kinase regulator activity; protein binding; protein kinase binding	GO:0005634	nucleus
Glyma.09G108700	qESP-9-1	GO:0006493	protein O-linked glycosylation	GO:0016757	transferase activity, transferring glycosyl groups	GO:0005634	nucleus
Glyma.09G108800	qESP-9-1	GO:0006355	regulation of transcription, DNA-dependent	GO:0003700 GO:0008270	sequence-specific DNA binding transcription factor activity; zinc ion binding	GO:0005634	nucleus
Glyma.09G108900	qESP-9-1	GO:0001510 GO:0006412	RNA methylation; translation	GO:0003735	structural constituent of ribosome	GO:0005622 GO:0005730 GO:0005737 GO:0005829 GO:0005840 GO:0005886 GO:0009506 GO:0022625 GO:0022626	cytoplasm; cytosol; cytosolic large ribosomal subunit; cytosolic ribosome; intracellular; nucleolus; plasma membrane; plasmodesma; ribosome
Glyma.09G109000	qESP-9-1	GO:0008150	biological process	GO:0003674	molecular function	GO:0005886	plasma membrane
Glyma.09G109100	qESP-9-1	GO:0006468 GO:0009827 GO:0009860	plant-type cell wall modification; pollen tube growth; protein phosphorylation	GO:0004672 GO:0004713 GO:0005524 GO:0016301 GO:0016772	ATP binding; kinase activity; protein kinase activity; protein tyrosine kinase activity; transferase activity, transferring phosphorus-containing groups	GO:0005737	cytoplasm
Glyma.09G109200	qESP-9-1	GO:0006457 GO:0009408 GO:0009644 GO:0034976 GO:0042542	protein folding; response to endoplasmic reticulum stress; response to heat; response to high light intensity; response to hydrogen peroxide	GO:0001671 GO:0051087	ATPase activator activity; chaperone binding	GO:0005634 GO:0005829	cytosol; nucleus
Glyma.09G109300	qESP-9-1	NA	NA	NA	NA	NA	NA
Glyma.09G109400	qESP-9-1	GO:0008150	biological process	GO:0003676 GO:0008270	nucleic acid binding; zinc ion binding	GO:0005634	nucleus
Glyma.09G109500	qESP-9-1	GO:0016126 GO:0019745	pentacyclic triterpenoid biosynthetic process; sterol biosynthetic process	GO:0003824 GO:0016866 GO:0042299	catalytic activity; intramolecular transferase activity; lupeol synthase activity	GO:0005634	nucleus
Glyma.09G109600	qESP-9-1	GO:0009827 GO:0009834 GO:0030244 GO:0045489	cellulose biosynthetic process; pectin biosynthetic process; plant-type cell wall modification; secondary cell wall biogenesis	GO:0003674	molecular function	GO:0005634 GO:0005768 GO:0005794 GO:0005802	Golgi apparatus; endosome; nucleus; trans-Golgi network
Glyma.09G109700	qESP-9-1	GO:0006355	regulation of transcription, DNA-dependent	GO:0003677 GO:0003700 GO:0043565	DNA binding; sequence-specific DNA binding; sequence-specific DNA binding transcription factor activity	GO:0005634	nucleus
Glyma.09G109800	qESP-9-1	GO:0002215 GO:0006979 GO:0009908 GO:0055114	defense response to nematode; flower development; oxidation-reduction process; response to oxidative stress	GO:0004601 GO:0020037	heme binding; peroxidase activity	GO:0005576 GO:0005794	Golgi apparatus; extracellular region
Glyma.09G109900	qESP-9-1	GO:0006863 GO:0009926 GO:0055085	auxin polar transport; purine nucleobase transport; transmembrane transport	GO:0009672	auxin:hydrogen symporter activity	GO:0016021	integral to membrane
Glyma.09G110000	qESP-9-1	NA	NA	NA	NA	NA	NA
Glyma.09G110100	qESP-9-1	GO:0008150	biological process	GO:0003674	molecular function	NA	NA
Glyma.09G110200	qESP-9-1	GO:0006164 GO:0006207 GO:0006520 GO:0009220 GO:0016036	de novo' pyrimidine nucleobase biosynthetic process; cellular amino acid metabolic process; cellular response to phosphate starvation; purine nucleotide biosynthetic process; pyrimidine ribonucleotide biosynthetic process	GO:0004070 GO:0005515 GO:0016597 GO:0016743	amino acid binding; aspartate carbamoyltransferase activity; carboxyl- or carbamoyltransferase activity; protein binding	GO:0005829 GO:0009507 GO:0009570	chloroplast; chloroplast stroma; cytosol
Glyma.09G110300	qESP-9-1	GO:0006275 GO:0006342 GO:0007018 GO:0010389 GO:0051567	chromatin silencing; histone H3-K9 methylation; microtubule-based movement; regulation of DNA replication; regulation of G2/M transition of mitotic cell cycle	GO:0003777 GO:0005524	ATP binding; microtubule motor activity	NA	NA
Glyma.09G110400	qESP-9-1	GO:0006418 GO:0006421 GO:0009793 GO:0046686	asparaginyl-tRNA aminoacylation; embryo development ending in seed dormancy; response to cadmium ion; tRNA aminoacylation for protein translation	GO:0000166 GO:0003676 GO:0004812 GO:0004816 GO:0005524	ATP binding; aminoacyl-tRNA ligase activity; asparagine-tRNA ligase activity; nucleic acid binding; nucleotide binding	GO:0005737 GO:0005739 GO:0005829 GO:0009507	chloroplast; cytoplasm; cytosol; mitochondrion
Glyma.09G110500	qESP-9-1	GO:0000041 GO:0006468	protein phosphorylation; transition metal ion transport	GO:0004672 GO:0004674 GO:0005524 GO:0016301 GO:0016772 GO:0030246	ATP binding; carbohydrate binding; kinase activity; protein kinase activity; protein serine/threonine kinase activity; transferase activity, transferring phosphorus-containing groups	GO:0005886	plasma membrane
Glyma.09G110600	qESP-9-1	NA	NA	GO:0004869	cysteine-type endopeptidase inhibitor activity	GO:0005576 GO:0005618	cell wall; extracellular region
Glyma.09G110700	qESP-9-1	GO:0000041 GO:0006468	protein phosphorylation; transition metal ion transport	GO:0004672 GO:0004674 GO:0005524 GO:0016301 GO:0016772 GO:0030246	ATP binding; carbohydrate binding; kinase activity; protein kinase activity; protein serine/threonine kinase activity; transferase activity, transferring phosphorus-containing groups	GO:0005886	plasma membrane
Glyma.09G110800	qESP-9-1	GO:0001510 GO:0006412 GO:0042254	RNA methylation; ribosome biogenesis; translation	GO:0003735	structural constituent of ribosome	GO:0005622 GO:0005730 GO:0005737 GO:0005773 GO:0005774 GO:0005783 GO:0005829 GO:0005840 GO:0009506 GO:0009507 GO:0022625 GO:0022626	chloroplast; cytoplasm; cytosol; cytosolic large ribosomal subunit; cytosolic ribosome; endoplasmic reticulum; intracellular; nucleolus; plasmodesma; ribosome; vacuolar membrane; vacuole
Glyma.09G110900	qESP-9-1	NA	NA	NA	NA	NA	NA
Glyma.09G111000	qESP-9-1	GO:0009416 GO:0042726	flavin-containing compound metabolic process; response to light stimulus	GO:0016787 GO:0047884	FAD diphosphatase activity; hydrolase activity	GO:0009507	chloroplast
Glyma.09G111100	qESP-9-1	GO:0006457	protein folding	GO:0031072	heat shock protein binding	NA	NA
Glyma.09G111200	qESP-9-1	GO:0007010	cytoskeleton organization	GO:0005200 GO:0005524	ATP binding; structural constituent of cytoskeleton	GO:0005618 GO:0005634 GO:0005737 GO:0005856 GO:0009506 GO:0048046	apoplast; cell wall; cytoplasm; cytoskeleton; nucleus; plasmodesma
Glyma.09G111300	qESP-9-1	GO:0006470	protein dephosphorylation	GO:0003824 GO:0004722	catalytic activity; protein serine/threonine phosphatase activity	GO:0005739 GO:0008287	mitochondrion; protein serine/threonine phosphatase complex
Glyma.09G111400	qESP-9-1	GO:0001510 GO:0006333 GO:0006606 GO:0008150 GO:0051604	RNA methylation; biological process; chromatin assembly or disassembly; protein import into nucleus; protein maturation	GO:0000166 GO:0003676 GO:0003723	RNA binding; nucleic acid binding; nucleotide binding	GO:0005730 GO:0009507	chloroplast; nucleolus
Glyma.09G111500	qESP-9-1	GO:0008150	biological process	GO:0003674	molecular function	GO:0005634	nucleus
Glyma.09G111600	qESP-9-1	GO:0006091 GO:0006354 GO:0006412 GO:0015979 GO:0019684	DNA-dependent transcription, elongation; generation of precursor metabolites and energy; photosynthesis; photosynthesis, light reaction; translation	GO:0003735 GO:0019843	rRNA binding; structural constituent of ribosome	GO:0000311 GO:0005622 GO:0005840 GO:0009507 GO:0009570 GO:0009941	chloroplast; chloroplast envelope; chloroplast stroma; intracellular; plastid large ribosomal subunit; ribosome
Glyma.09G111700	qESP-9-1	GO:0008150 GO:0010027 GO:0019288	biological process; isopentenyl diphosphate biosynthetic process, mevalonate-independent pathway; thylakoid membrane organization	GO:0005198	structural molecule activity	GO:0009507 GO:0009534 GO:0009570 GO:0009579 GO:0010287	chloroplast; chloroplast stroma; chloroplast thylakoid; plastoglobule; thylakoid
Glyma.09G111800	qESP-9-1	GO:0008150	biological process	GO:0003674	molecular function	GO:0005634	nucleus
Glyma.09G111900	qESP-9-1	GO:0006629 GO:0055114	lipid metabolic process; oxidation-reduction process	GO:0016717 GO:0016720 GO:0045485	delta12-fatty acid dehydrogenase activity; omega-6 fatty acid desaturase activity; oxidoreductase activity, acting on paired donors, with oxidation of a pair of donors resulting in the reduction of molecular oxygen to two molecules of water	GO:0005634 GO:0005783	endoplasmic reticulum; nucleus
Glyma.09G112000	qESP-9-1	GO:0002237 GO:0006468 GO:0006499	N-terminal protein myristoylation; protein phosphorylation; response to molecule of bacterial origin	GO:0004672 GO:0004674 GO:0004713 GO:0005524 GO:0016301 GO:0016772	ATP binding; kinase activity; protein kinase activity; protein serine/threonine kinase activity; protein tyrosine kinase activity; transferase activity, transferring phosphorus-containing groups	GO:0005634	nucleus
Glyma.09G112100	qESP-9-1	GO:0006970 GO:0009409 GO:0009414 GO:0009790 GO:0009793 GO:0048316	embryo development; embryo development ending in seed dormancy; response to cold; response to osmotic stress; response to water deprivation; seed development	GO:0003674	molecular function	GO:0005575	cellular component
Glyma.09G112200	qESP-9-1	GO:0000278 GO:0003002 GO:0006338 GO:0007155 GO:0009793 GO:0009909 GO:0009910 GO:0010090 GO:0010228 GO:0033043 GO:0042742 GO:0045010 GO:0046686 GO:0048441 GO:0048449 GO:0048451 GO:0048453 GO:0048765 GO:0071555	actin nucleation; cell adhesion; cell wall organization; chromatin remodeling; defense response to bacterium; embryo development ending in seed dormancy; floral organ formation; mitotic cell cycle; negative regulation of flower development; petal development; petal formation; regionalization; regulation of flower development; regulation of organelle organization; response to cadmium ion; root hai…	GO:0003676 GO:0003677 GO:0004386 GO:0005515 GO:0005524	ATP binding; DNA binding; helicase activity; nucleic acid binding; protein binding	GO:0005618 GO:0005634 GO:0016514	SWI/SNF complex; cell wall; nucleus
Glyma.09G112300	qESP-9-1	NA	NA	NA	NA	NA	NA
Glyma.09G112400	qESP-9-1	GO:0008150	biological process	GO:0003674	molecular function	NA	NA
Glyma.09G112500	qESP-9-1	GO:0008150 GO:0008284 GO:0010413 GO:0045492	biological process; glucuronoxylan metabolic process; positive regulation of cell proliferation; xylan biosynthetic process	GO:0003674	molecular function	GO:0005634	nucleus
Glyma.09G112600	qESP-9-1	NA	NA	NA	NA	NA	NA
Glyma.09G112700	qESP-9-1	GO:0008150	biological process	GO:0003674	molecular function	GO:0009507	chloroplast
Glyma.09G112800	qESP-9-1	NA	NA	NA	NA	NA	NA
Glyma.09G112900	qESP-9-1	GO:0008150	biological process	GO:0003674	molecular function	NA	NA
Glyma.09G113000	qESP-9-1	GO:0006355	regulation of transcription, DNA-dependent	GO:0003700	sequence-specific DNA binding transcription factor activity	GO:0005634	nucleus
Glyma.09G113100	qESP-9-1	GO:0006355	regulation of transcription, DNA-dependent	GO:0003700	sequence-specific DNA binding transcription factor activity	GO:0005634	nucleus
Glyma.09G113200	qESP-9-1	NA	NA	GO:0004536 GO:0016888	deoxyribonuclease activity; endodeoxyribonuclease activity, producing 5'-phosphomonoesters	GO:0005634	nucleus
Glyma.09G113300	qESP-9-1	GO:0006944 GO:0008654 GO:0009697 GO:0009863 GO:0010200 GO:0030968 GO:0031348 GO:0045087	cellular membrane fusion; endoplasmic reticulum unfolded protein response; innate immune response; negative regulation of defense response; phospholipid biosynthetic process; response to chitin; salicylic acid biosynthetic process; salicylic acid mediated signaling pathway	GO:0004168 GO:0004605	dolichol kinase activity; phosphatidate cytidylyltransferase activity	GO:0016020	membrane
Glyma.09G113400	qESP-9-1	GO:0006468 GO:0006486	protein glycosylation; protein phosphorylation	GO:0004672 GO:0004674 GO:0005524 GO:0016301 GO:0016772	ATP binding; kinase activity; protein kinase activity; protein serine/threonine kinase activity; transferase activity, transferring phosphorus-containing groups	GO:0005634	nucleus
Glyma.09G113500	qESP-9-1	GO:0000278 GO:0000956 GO:0006346 GO:0006355 GO:0006396 GO:0009736 GO:0009740 GO:0009938 GO:0016246 GO:0043687 GO:0045893 GO:2000377	RNA interference; RNA processing; cytokinin mediated signaling pathway; gibberellic acid mediated signaling pathway; methylation-dependent chromatin silencing; mitotic cell cycle; negative regulation of gibberellic acid mediated signaling pathway; nuclear-transcribed mRNA catabolic process; positive regulation of transcription, DNA-dependent; post-translational protein modification; regulation of…	GO:0005515 GO:0016262 GO:0016757	protein N-acetylglucosaminyltransferase activity; protein binding; transferase activity, transferring glycosyl groups	GO:0005634 GO:0005737 GO:0005829	cytoplasm; cytosol; nucleus
Glyma.09G113600	qESP-9-1	GO:0046488	phosphatidylinositol metabolic process	GO:0005524 GO:0016307 GO:0016308	1-phosphatidylinositol-4-phosphate 5-kinase activity; ATP binding; phosphatidylinositol phosphate kinase activity	GO:0005634 GO:0005886	nucleus; plasma membrane
Glyma.09G113700	qESP-9-1	GO:0006047 GO:0008152 GO:0019276	UDP-N-acetylgalactosamine metabolic process; UDP-N-acetylglucosamine metabolic process; metabolic process	GO:0003977 GO:0016779 GO:0052630	UDP-N-acetylgalactosamine diphosphorylase activity; UDP-N-acetylglucosamine diphosphorylase activity; nucleotidyltransferase activity	GO:0005737 GO:0005829 GO:0005886	cytoplasm; cytosol; plasma membrane
Glyma.09G113800	qESP-9-1	GO:0006355 GO:0010228 GO:0048366 GO:0048653 GO:2000025	anther development; leaf development; regulation of leaf formation; regulation of transcription, DNA-dependent; vegetative to reproductive phase transition of meristem	GO:0003677 GO:0003700	DNA binding; sequence-specific DNA binding transcription factor activity	GO:0005634	nucleus
Glyma.09G113900	qESP-9-1	NA	NA	NA	NA	NA	NA
Glyma.09G114000	qESP-9-1	GO:0008150	biological process	GO:0003674	molecular function	GO:0005739 GO:0009507 GO:0009536 GO:0009941	chloroplast; chloroplast envelope; mitochondrion; plastid
Glyma.09G114100	qESP-9-1	GO:0008150	biological process	GO:0003674	molecular function	GO:0005737	cytoplasm
Glyma.09G114200	qESP-9-1	GO:0015031	protein transport	GO:0008565	protein transporter activity	GO:0005794 GO:0005886 GO:0009507	Golgi apparatus; chloroplast; plasma membrane
Glyma.09G114300	qESP-9-1	GO:0006333	chromatin assembly or disassembly	NA	NA	GO:0005783	endoplasmic reticulum
Glyma.09G114400	qESP-9-1	NA	NA	NA	NA	NA	NA
Glyma.09G114500	qESP-9-1	GO:0008150	biological process	NA	NA	GO:0000145 GO:0005886	exocyst; plasma membrane
Glyma.09G114600	qESP-9-1	GO:0008150	biological process	GO:0003674	molecular function	GO:0005634 GO:0005829 GO:0009507	chloroplast; cytosol; nucleus
Glyma.09G114700	qESP-9-1	GO:0008150	biological process	NA	NA	GO:0000145 GO:0005886	exocyst; plasma membrane
Glyma.09G114800	qESP-9-1	GO:0000096 GO:0000165 GO:0006546 GO:0006569 GO:0006612 GO:0006636 GO:0006733 GO:0006766 GO:0006952 GO:0008652 GO:0009072 GO:0009106 GO:0009108 GO:0009117 GO:0009416 GO:0009595 GO:0009611 GO:0009620 GO:0009684 GO:0009694 GO:0009695 GO:0009697 GO:0009753 GO:0009862 GO:0009867 GO:0010200 GO:0010310 GO:0010363 GO:0015994 GO:0019216 GO:0019288 GO:0019373 GO:0019748 GO:0019761 GO:0031348 GO:0031407 GO:…	MAPK cascade; aromatic amino acid family metabolic process; cellular amino acid biosynthetic process; chlorophyll metabolic process; coenzyme biosynthetic process; defense response; defense response to bacterium; defense response to fungus; detection of biotic stimulus; epoxygenase P450 pathway; glucosinolate biosynthetic process; glycine catabolic process; indoleacetic acid biosynthetic process;…	GO:0005506 GO:0009055 GO:0009978 GO:0016705 GO:0016836 GO:0019825 GO:0020037	allene oxide synthase activity; electron carrier activity; heme binding; hydro-lyase activity; iron ion binding; oxidoreductase activity, acting on paired donors, with incorporation or reduction of molecular oxygen; oxygen binding	GO:0005739 GO:0009507 GO:0009534 GO:0009535 GO:0009579 GO:0009941 GO:0010287 GO:0016020	chloroplast; chloroplast envelope; chloroplast thylakoid; chloroplast thylakoid membrane; membrane; mitochondrion; plastoglobule; thylakoid
Glyma.09G114900	qESP-9-1	GO:0006355 GO:0009909 GO:0010048	regulation of flower development; regulation of transcription, DNA-dependent; vernalization response	GO:0003677	DNA binding	GO:0005634 GO:0005654	nucleoplasm; nucleus
Glyma.09G115000	qESP-9-1	GO:0008150	biological process	GO:0003674	molecular function	GO:0005634	nucleus
Glyma.09G115100	qESP-9-1	GO:0009793 GO:0010106	cellular response to iron ion starvation; embryo development ending in seed dormancy	GO:0008270	zinc ion binding	GO:0005634	nucleus
Glyma.09G115200	qESP-9-1	NA	NA	GO:0016757	transferase activity, transferring glycosyl groups	GO:0016020	membrane
Glyma.09G115300	qESP-9-1	GO:0006468 GO:0007169	protein phosphorylation; transmembrane receptor protein tyrosine kinase signaling pathway	GO:0004672 GO:0004674 GO:0005524 GO:0016301 GO:0016772	ATP binding; kinase activity; protein kinase activity; protein serine/threonine kinase activity; transferase activity, transferring phosphorus-containing groups	GO:0005576	extracellular region
Glyma.09G115400	qESP-9-1	NA	NA	GO:0016787	hydrolase activity	GO:0005737	cytoplasm
Glyma.09G115500	qESP-9-1	NA	NA	NA	NA	NA	NA
Glyma.09G115600	qESP-9-1	NA	NA	GO:0003676 GO:0003723 GO:0003725 GO:0004386 GO:0005524 GO:0008026	ATP-dependent helicase activity; ATP binding; RNA binding; double-stranded RNA binding; helicase activity; nucleic acid binding	GO:0005622 GO:0005634	intracellular; nucleus
Glyma.09G115700	qESP-9-1	NA	NA	NA	NA	NA	NA
Glyma.09G115800	qESP-9-1	GO:0009738	abscisic acid mediated signaling pathway	GO:0003824 GO:0003993 GO:0008195	acid phosphatase activity; catalytic activity; phosphatidate phosphatase activity	GO:0005737 GO:0005886 GO:0005887 GO:0016020	cytoplasm; integral to plasma membrane; membrane; plasma membrane
Glyma.09G115900	qESP-9-1	GO:0016132 GO:0055114	brassinosteroid biosynthetic process; oxidation-reduction process	GO:0005506 GO:0009055 GO:0016705 GO:0019825 GO:0020037	electron carrier activity; heme binding; iron ion binding; oxidoreductase activity, acting on paired donors, with incorporation or reduction of molecular oxygen; oxygen binding	NA	NA
Glyma.09G116000	qESP-9-1	NA	NA	NA	NA	GO:0005634 GO:0005829	cytosol; nucleus
Glyma.09G116100	qESP-9-1	GO:0009926 GO:0055085	auxin polar transport; transmembrane transport	GO:0009672	auxin:hydrogen symporter activity	GO:0016021	integral to membrane
Glyma.09G116200	qESP-9-1	GO:0008150	biological process	GO:0003674	molecular function	GO:0005634	nucleus
Glyma.09G116300	qESP-9-1	GO:0002679 GO:0006468 GO:0006984 GO:0009407 GO:0010200 GO:0010583 GO:0034976	ER-nucleus signaling pathway; protein phosphorylation; respiratory burst involved in defense response; response to chitin; response to cyclopentenone; response to endoplasmic reticulum stress; toxin catabolic process	GO:0004672 GO:0004674 GO:0004713 GO:0005524 GO:0016301 GO:0016772	ATP binding; kinase activity; protein kinase activity; protein serine/threonine kinase activity; protein tyrosine kinase activity; transferase activity, transferring phosphorus-containing groups	GO:0005576 GO:0005886	extracellular region; plasma membrane
Glyma.09G116400	qESP-9-1	GO:0006355	regulation of transcription, DNA-dependent	GO:0003677 GO:0003700	DNA binding; sequence-specific DNA binding transcription factor activity	GO:0005634	nucleus
Glyma.09G116500	qESP-9-1	GO:0008150	biological process	GO:0003674	molecular function	GO:0005739 GO:0005886	mitochondrion; plasma membrane
Glyma.09G116600	qESP-9-1	GO:0006457	protein folding	GO:0031072	heat shock protein binding	GO:0009507	chloroplast
Glyma.09G116700	qESP-9-1	GO:0008150	biological process	GO:0003674	molecular function	GO:0005739 GO:0005886	mitochondrion; plasma membrane
Glyma.09G116800	qESP-9-1	GO:0006457	protein folding	GO:0031072	heat shock protein binding	GO:0009507	chloroplast
Glyma.09G116900	qESP-9-1	GO:0006810 GO:0006839 GO:0043132 GO:0055085	NAD transport; mitochondrial transport; transmembrane transport; transport	GO:0005215 GO:0051724	NAD transporter activity; transporter activity	GO:0005739 GO:0005743	mitochondrial inner membrane; mitochondrion
Glyma.09G117000	qESP-9-1	GO:0008150	biological process	GO:0003674	molecular function	GO:0005634	nucleus
Glyma.09G117100	qESP-9-1	GO:0008150	biological process	GO:0003674	molecular function	NA	NA
Glyma.09G117200	qESP-9-1	GO:0006355 GO:0009909 GO:0010048	regulation of flower development; regulation of transcription, DNA-dependent; vernalization response	GO:0003677	DNA binding	GO:0005634 GO:0005654	nucleoplasm; nucleus
Glyma.09G117300	qESP-9-1	GO:0008152	metabolic process	GO:0000166 GO:0016491	nucleotide binding; oxidoreductase activity	GO:0005737	cytoplasm
Glyma.09G117400	qESP-9-1	GO:0055114	oxidation-reduction process	GO:0005506 GO:0009055 GO:0016705 GO:0019825 GO:0020037	electron carrier activity; heme binding; iron ion binding; oxidoreductase activity, acting on paired donors, with incorporation or reduction of molecular oxygen; oxygen binding	NA	NA
Glyma.09G117500	qESP-9-1	GO:0006355 GO:0009909 GO:0010048	regulation of flower development; regulation of transcription, DNA-dependent; vernalization response	GO:0003677	DNA binding	GO:0005634 GO:0005654	nucleoplasm; nucleus
Glyma.09G117600	qESP-9-1	GO:0006753 GO:0006857 GO:0015967 GO:0019243	diadenosine tetraphosphate catabolic process; methylglyoxal catabolic process to D-lactate; nucleoside phosphate metabolic process; oligopeptide transport	GO:0004081 GO:0008893	bis(5'-nucleosyl)-tetraphosphatase (asymmetrical) activity; guanosine-3',5'-bis(diphosphate) 3'-diphosphatase activity	GO:0009507	chloroplast
Glyma.09G117700	qESP-9-1	GO:0008150	biological process	GO:0003674	molecular function	GO:0005634	nucleus
Glyma.09G117800	qESP-9-1	GO:0006281 GO:0006310	DNA recombination; DNA repair	GO:0003676 GO:0004003 GO:0004386 GO:0005524 GO:0008026	ATP-dependent DNA helicase activity; ATP-dependent helicase activity; ATP binding; helicase activity; nucleic acid binding	GO:0005634	nucleus
Glyma.09G117900	qESP-9-1	GO:0000271 GO:0007389 GO:0008356 GO:0008361 GO:0009416 GO:0009606 GO:0009630 GO:0009825 GO:0009926 GO:0009932 GO:0009958 GO:0010015 GO:0010082 GO:0010218 GO:0010315 GO:0010817 GO:0040007 GO:0043481 GO:0048364 GO:0048765 GO:0048766 GO:0048767 GO:0071555	anthocyanin accumulation in tissues in response to UV light; asymmetric cell division; auxin efflux; auxin polar transport; cell tip growth; cell wall organization; gravitropism; growth; multidimensional cell growth; pattern specification process; polysaccharide biosynthetic process; positive gravitropism; regulation of cell size; regulation of hormone levels; regulation of root meristem growth; …	GO:0005215 GO:0009672	auxin:hydrogen symporter activity; transporter activity	GO:0005886 GO:0009986 GO:0012506 GO:0016328	cell surface; lateral plasma membrane; plasma membrane; vesicle membrane
Glyma.09G118000	qESP-9-1	NA	NA	NA	NA	NA	NA
Glyma.09G118100	qESP-9-1	GO:0006457 GO:0008150 GO:0009408 GO:0009644 GO:0034976 GO:0042542	biological process; protein folding; response to endoplasmic reticulum stress; response to heat; response to high light intensity; response to hydrogen peroxide	GO:0003674	molecular function	GO:0005634 GO:0009507 GO:0009535 GO:0009536 GO:0009941	chloroplast; chloroplast envelope; chloroplast thylakoid membrane; nucleus; plastid
Glyma.09G118200	qESP-9-1	NA	NA	NA	NA	NA	NA
Glyma.09G118300	qESP-9-1	GO:0006952 GO:0030003 GO:0070838	cellular cation homeostasis; defense response; divalent metal ion transport	GO:0003674	molecular function	GO:0009507	chloroplast
Glyma.09G118400	qESP-9-1	GO:0008150	biological process	GO:0003674	molecular function	GO:0005774 GO:0005783 GO:0005886	endoplasmic reticulum; plasma membrane; vacuolar membrane
Glyma.09G118500	qESP-9-1	NA	NA	NA	NA	NA	NA
Glyma.09G118600	qESP-9-1	GO:0009435 GO:0019363	NAD biosynthetic process; pyridine nucleotide biosynthetic process	GO:0003824 GO:0004514 GO:0016763	catalytic activity; nicotinate-nucleotide diphosphorylase (carboxylating) activity; transferase activity, transferring pentosyl groups	GO:0009507	chloroplast
Glyma.09G118700	qESP-9-1	NA	NA	NA	NA	NA	NA
Glyma.09G118800	qESP-9-1	GO:0006499 GO:0009624	N-terminal protein myristoylation; response to nematode	GO:0003674	molecular function	GO:0005886	plasma membrane
Glyma.09G118900	qESP-9-1	GO:0003333 GO:0006612 GO:0006820 GO:0006862 GO:0006865 GO:0006888 GO:0006944 GO:0009407 GO:0010363 GO:0010583 GO:0015696 GO:0015802 GO:0015824 GO:0043069 GO:0043090 GO:0043091 GO:0043269 GO:0051938	ER to Golgi vesicle-mediated transport; L-arginine import; L-glutamate import; amino acid import; amino acid transmembrane transport; amino acid transport; ammonium transport; anion transport; basic amino acid transport; cellular membrane fusion; negative regulation of programmed cell death; nucleotide transport; proline transport; protein targeting to membrane; regulation of ion transport; regul…	GO:0005313 GO:0015171 GO:0015181 GO:0015189 GO:0015326	L-glutamate transmembrane transporter activity; L-lysine transmembrane transporter activity; amino acid transmembrane transporter activity; arginine transmembrane transporter activity; cationic amino acid transmembrane transporter activity	GO:0005737 GO:0005886 GO:0016020	cytoplasm; membrane; plasma membrane
Glyma.09G119000	qESP-9-1	GO:0000271 GO:0009832 GO:0009846 GO:0030244	cellulose biosynthetic process; plant-type cell wall biogenesis; pollen germination; polysaccharide biosynthetic process	GO:0016757 GO:0016759 GO:0016760	cellulose synthase (UDP-forming) activity; cellulose synthase activity; transferase activity, transferring glycosyl groups	GO:0005794 GO:0016020	Golgi apparatus; membrane
Glyma.09G119100	qESP-9-1	GO:0006833 GO:0009651 GO:0009750	response to fructose stimulus; response to salt stress; water transport	GO:0051119	sugar transmembrane transporter activity	GO:0005886 GO:0005887 GO:0009705 GO:0016020	integral to plasma membrane; membrane; plant-type vacuole membrane; plasma membrane
Glyma.09G119200	qESP-9-1	GO:0006301 GO:0006651 GO:0006655 GO:0008152 GO:0019432	diacylglycerol biosynthetic process; metabolic process; phosphatidylglycerol biosynthetic process; postreplication repair; triglyceride biosynthetic process	GO:0016746	transferase activity, transferring acyl groups	GO:0005634 GO:0005783 GO:0005886 GO:0016020	endoplasmic reticulum; membrane; nucleus; plasma membrane
Glyma.09G119300	qESP-9-1	NA	NA	NA	NA	NA	NA
Glyma.09G119400	qESP-9-1	NA	NA	NA	NA	NA	NA
Glyma.09G119500	qESP-9-1	GO:0016036 GO:0019375 GO:0030001 GO:0045892	cellular response to phosphate starvation; galactolipid biosynthetic process; metal ion transport; negative regulation of transcription, DNA-dependent	GO:0046872	metal ion binding	GO:0005737	cytoplasm
Glyma.09G119600	qESP-9-1	GO:0006468 GO:0006857 GO:0006995 GO:0009627 GO:0031347	cellular response to nitrogen starvation; oligopeptide transport; protein phosphorylation; regulation of defense response; systemic acquired resistance	GO:0004672 GO:0004713 GO:0005524 GO:0016301 GO:0016772	ATP binding; kinase activity; protein kinase activity; protein tyrosine kinase activity; transferase activity, transferring phosphorus-containing groups	GO:0005634 GO:0005886 GO:0009506 GO:0016020	membrane; nucleus; plasma membrane; plasmodesma
Glyma.09G119700	qESP-9-1	GO:0016051	carbohydrate biosynthetic process	GO:0008375 GO:0016757	acetylglucosaminyltransferase activity; transferase activity, transferring glycosyl groups	GO:0005794 GO:0016020	Golgi apparatus; membrane
Glyma.09G119800	qESP-9-1	NA	NA	GO:0003674	molecular function	GO:0005576	extracellular region
Glyma.09G119900	qESP-9-1	NA	NA	NA	NA	NA	NA
Glyma.09G120000	qESP-9-1	GO:0016036 GO:0019375 GO:0030001 GO:0045892	cellular response to phosphate starvation; galactolipid biosynthetic process; metal ion transport; negative regulation of transcription, DNA-dependent	GO:0046872	metal ion binding	GO:0005737	cytoplasm
Glyma.09G120100	qESP-9-1	GO:0006626 GO:0009640 GO:0009909 GO:0010388 GO:0034968	cullin deneddylation; histone lysine methylation; photomorphogenesis; protein targeting to mitochondrion; regulation of flower development	GO:0008168	methyltransferase activity	GO:0005634	nucleus
Glyma.09G120200	qESP-9-1	GO:0006200 GO:0006259 GO:0006261 GO:0006265 GO:0007059 GO:0009220	ATP catabolic process; DNA-dependent DNA replication; DNA metabolic process; DNA topological change; chromosome segregation; pyrimidine ribonucleotide biosynthetic process	GO:0003677 GO:0003824 GO:0003916 GO:0003918 GO:0005524 GO:0008094	ATP binding; DNA-dependent ATPase activity; DNA binding; DNA topoisomerase activity; DNA topoisomerase type II (ATP-hydrolyzing) activity; catalytic activity	GO:0005739 GO:0009295 GO:0009330 GO:0009507 GO:0016592	DNA topoisomerase complex (ATP-hydrolyzing); chloroplast; mediator complex; mitochondrion; nucleoid
Glyma.09G120300	qESP-9-1	GO:0009639	response to red or far red light	GO:0008270	zinc ion binding	GO:0005634	nucleus
Glyma.09G120400	qESP-9-1	GO:0008150	biological process	NA	NA	GO:0009507 GO:0009570	chloroplast; chloroplast stroma
Glyma.09G120500	qESP-9-1	NA	NA	NA	NA	NA	NA
Glyma.09G120600	qESP-9-1	GO:0006486 GO:0006499 GO:0006623 GO:0016192 GO:0048268	N-terminal protein myristoylation; clathrin coat assembly; protein glycosylation; protein targeting to vacuole; vesicle-mediated transport	GO:0005543 GO:0005545 GO:0030276	1-phosphatidylinositol binding; clathrin binding; phospholipid binding	GO:0005886 GO:0016020	membrane; plasma membrane
Glyma.09G120700	qESP-9-1	NA	NA	NA	NA	NA	NA
Glyma.09G120800	qESP-9-1	NA	NA	GO:0016788	hydrolase activity, acting on ester bonds	GO:0005634	nucleus
Glyma.09G120900	qESP-9-1	GO:0008150	biological process	GO:0003674	molecular function	GO:0005737	cytoplasm
Glyma.09G121000	qESP-9-1	NA	NA	NA	NA	NA	NA
Glyma.09G121100	qESP-9-1	GO:0008150	biological process	NA	NA	GO:0005576	extracellular region
Glyma.09G121200	qESP-9-1	GO:0000911 GO:0006260 GO:0006270 GO:0006275 GO:0006306 GO:0006342 GO:0006346 GO:0007059 GO:0007067 GO:0007129 GO:0007131 GO:0008283 GO:0009909 GO:0010267 GO:0010389 GO:0010564 GO:0016458 GO:0016570 GO:0031047 GO:0031048 GO:0034968 GO:0035196 GO:0048449 GO:0051276 GO:0051567 GO:0051607 GO:0051726	DNA methylation; DNA replication; DNA replication initiation; cell proliferation; chromatin silencing; chromatin silencing by small RNA; chromosome organization; chromosome segregation; cytokinesis by cell plate formation; defense response to virus; floral organ formation; gene silencing; gene silencing by RNA; histone H3-K9 methylation; histone lysine methylation; histone modification; methylati…	GO:0005215 GO:0005524	ATP binding; transporter activity	GO:0005634 GO:0005694	chromosome; nucleus
Glyma.09G121300	qESP-9-1	GO:0006468 GO:0009832 GO:0010413 GO:0045492	glucuronoxylan metabolic process; plant-type cell wall biogenesis; protein phosphorylation; xylan biosynthetic process	GO:0004672 GO:0005524 GO:0016301 GO:0016772	ATP binding; kinase activity; protein kinase activity; transferase activity, transferring phosphorus-containing groups	GO:0005634 GO:0005886	nucleus; plasma membrane
Glyma.09G121400	qESP-9-1	GO:0006354 GO:0009220 GO:0009306 GO:0009793 GO:0015031	DNA-dependent transcription, elongation; embryo development ending in seed dormancy; protein secretion; protein transport; pyrimidine ribonucleotide biosynthetic process	GO:0015450	P-P-bond-hydrolysis-driven protein transmembrane transporter activity	GO:0005886 GO:0009526 GO:0016020	membrane; plasma membrane; plastid envelope
Glyma.09G121500	qESP-9-1	GO:0007018	microtubule-based movement	GO:0003777 GO:0005524	ATP binding; microtubule motor activity	GO:0005737 GO:0005886	cytoplasm; plasma membrane
Glyma.09G121600	qESP-9-1	NA	NA	NA	NA	NA	NA
Glyma.09G121700	qESP-9-1	GO:0006468	protein phosphorylation	GO:0004672 GO:0004674 GO:0004713 GO:0005524 GO:0016301 GO:0016772	ATP binding; kinase activity; protein kinase activity; protein serine/threonine kinase activity; protein tyrosine kinase activity; transferase activity, transferring phosphorus-containing groups	GO:0005634	nucleus
Glyma.09G121800	qESP-9-1	GO:0006511 GO:0030163	protein catabolic process; ubiquitin-dependent protein catabolic process	GO:0000166 GO:0005524 GO:0016787 GO:0016887 GO:0017111	ATP binding; ATPase activity; hydrolase activity; nucleoside-triphosphatase activity; nucleotide binding	GO:0000502 GO:0005634 GO:0005737 GO:0005829 GO:0005886 GO:0008540	cytoplasm; cytosol; nucleus; plasma membrane; proteasome complex; proteasome regulatory particle, base subcomplex
Glyma.09G121900	qESP-9-1	GO:0009639	response to red or far red light	GO:0008270	zinc ion binding	GO:0005634	nucleus
Glyma.09G122000	qESP-9-1	NA	NA	GO:0004857 GO:0030599 GO:0046910	enzyme inhibitor activity; pectinesterase activity; pectinesterase inhibitor activity	GO:0005576	extracellular region
Glyma.09G122100	qESP-9-1	GO:0006346 GO:0007267 GO:0009616 GO:0009855 GO:0009887 GO:0009944 GO:0010014 GO:0010050 GO:0010051 GO:0010072 GO:0010073 GO:0010267 GO:0010586 GO:0016246 GO:0035019 GO:0035196 GO:0048439 GO:0048519	RNA interference; cell-cell signaling; determination of bilateral symmetry; flower morphogenesis; meristem initiation; meristem maintenance; methylation-dependent chromatin silencing; miRNA metabolic process; negative regulation of biological process; organ morphogenesis; polarity specification of adaxial/abaxial axis; primary shoot apical meristem specification; production of miRNAs involved in …	GO:0003676 GO:0003743 GO:0035198	miRNA binding; nucleic acid binding; translation initiation factor activity	GO:0005737	cytoplasm
Glyma.09G122200	qESP-9-1	GO:0008150	biological process	GO:0003674	molecular function	GO:0005783 GO:0005794 GO:0009507	Golgi apparatus; chloroplast; endoplasmic reticulum
Glyma.09G122300	qESP-9-1	GO:0008150	biological process	GO:0003674	molecular function	GO:0005634	nucleus
Glyma.09G122400	qESP-9-1	NA	NA	NA	NA	NA	NA
Glyma.09G122500	qESP-9-1	GO:0006863 GO:0008152 GO:0009611 GO:0009625 GO:0009753 GO:0016106 GO:0080027	metabolic process; purine nucleobase transport; response to herbivore; response to insect; response to jasmonic acid stimulus; response to wounding; sesquiterpenoid biosynthetic process	GO:0000287 GO:0010333 GO:0016829 GO:0034768 GO:0050551 GO:0052578	(E)-beta-ocimene synthase activity; alpha-farnesene synthase activity; lyase activity; magnesium ion binding; myrcene synthase activity; terpene synthase activity	GO:0005829 GO:0009507	chloroplast; cytosol
Glyma.09G122600	qESP-9-1	GO:0006812 GO:0009718 GO:0009744 GO:0010224 GO:0055085	anthocyanin-containing compound biosynthetic process; cation transport; response to UV-B; response to sucrose stimulus; transmembrane transport	GO:0008324	cation transmembrane transporter activity	GO:0016020 GO:0016021	integral to membrane; membrane
Glyma.09G122700	qESP-9-1	GO:0008150	biological process	GO:0003677 GO:0046983	DNA binding; protein dimerization activity	GO:0005634	nucleus
Glyma.09G122800	qESP-9-1	GO:0008150	biological process	GO:0003674	molecular function	GO:0005739	mitochondrion
Glyma.09G122900	qESP-9-1	GO:0005975 GO:0005990 GO:0019513 GO:0019515	carbohydrate metabolic process; lactose catabolic process; lactose catabolic process, using glucoside 3-dehydrogenase; lactose catabolic process via UDP-galactose	GO:0003824 GO:0004553 GO:0004565 GO:0030246 GO:0043169	beta-galactosidase activity; carbohydrate binding; catalytic activity; cation binding; hydrolase activity, hydrolyzing O-glycosyl compounds	GO:0005576	extracellular region
Glyma.09G123000	qESP-9-1	GO:0005975	carbohydrate metabolic process	GO:0003824 GO:0004553 GO:0004565 GO:0030246 GO:0043169	beta-galactosidase activity; carbohydrate binding; catalytic activity; cation binding; hydrolase activity, hydrolyzing O-glycosyl compounds	GO:0005576	extracellular region
Glyma.09G123100	qESP-9-1	NA	NA	NA	NA	GO:0009507	chloroplast
Glyma.09G123200	qESP-9-1	GO:0016132 GO:0055114	brassinosteroid biosynthetic process; oxidation-reduction process	GO:0005506 GO:0009055 GO:0016705 GO:0019825 GO:0020037	electron carrier activity; heme binding; iron ion binding; oxidoreductase activity, acting on paired donors, with incorporation or reduction of molecular oxygen; oxygen binding	NA	NA
Glyma.09G123300	qESP-9-1	GO:0009640	photomorphogenesis	GO:0003700 GO:0004871	sequence-specific DNA binding transcription factor activity; signal transducer activity	GO:0005634 GO:0005737	cytoplasm; nucleus
Glyma.09G123400	qESP-9-1	GO:0006605 GO:0006886 GO:0009790 GO:0017038	embryo development; intracellular protein transport; protein import; protein targeting	GO:0005524 GO:0008270	ATP binding; zinc ion binding	GO:0005886 GO:0009536 GO:0009941 GO:0016020	chloroplast envelope; membrane; plasma membrane; plastid
Glyma.09G123500	qESP-9-1	GO:0006487 GO:0010413 GO:0045492	glucuronoxylan metabolic process; protein N-linked glycosylation; xylan biosynthetic process	GO:0003674	molecular function	GO:0005634	nucleus
Glyma.09G123600	qESP-9-1	GO:0009611 GO:0009695 GO:0009867 GO:0031347	jasmonic acid biosynthetic process; jasmonic acid mediated signaling pathway; regulation of defense response; response to wounding	GO:0005515 GO:0042802	identical protein binding; protein binding	GO:0005634	nucleus
Glyma.09G123700	qESP-9-1	NA	NA	NA	NA	NA	NA
Glyma.09G123800	qESP-9-1	GO:0008150	biological process	GO:0005509	calcium ion binding	GO:0009507	chloroplast
Glyma.09G123900	qESP-9-1	NA	NA	NA	NA	NA	NA
Glyma.09G124000	qESP-9-1	GO:0008150	biological process	GO:0046983	protein dimerization activity	NA	NA
Glyma.09G124100	qESP-9-1	NA	NA	NA	NA	NA	NA
Glyma.09G124200	qESP-9-1	GO:0009737 GO:0009819	drought recovery; response to abscisic acid stimulus	GO:0005509	calcium ion binding	GO:0009507	chloroplast
Glyma.09G124300	qESP-9-1	GO:0006364 GO:0009657 GO:0010207 GO:0015979	photosynthesis; photosystem II assembly; plastid organization; rRNA processing	GO:0003674	molecular function	GO:0009507 GO:0009522 GO:0009534 GO:0009535 GO:0009538	chloroplast; chloroplast thylakoid; chloroplast thylakoid membrane; photosystem I; photosystem I reaction center
Glyma.09G124400	qESP-9-1	GO:0009737 GO:0009819	drought recovery; response to abscisic acid stimulus	GO:0005509	calcium ion binding	GO:0009507	chloroplast
Glyma.09G124500	qESP-9-1	GO:0008150	biological process	GO:0016829 GO:0030570	lyase activity; pectate lyase activity	GO:0005886	plasma membrane
Glyma.09G124600	qESP-9-1	GO:0009737 GO:0009819	drought recovery; response to abscisic acid stimulus	GO:0005509	calcium ion binding	GO:0009507	chloroplast
Glyma.09G124700	qESP-9-1	GO:0009737 GO:0009819	drought recovery; response to abscisic acid stimulus	GO:0005509	calcium ion binding	GO:0009507	chloroplast
Glyma.09G124800	qESP-9-1	GO:0006301 GO:0006623	postreplication repair; protein targeting to vacuole	GO:0004842 GO:0005515 GO:0016881	acid-amino acid ligase activity; protein binding; ubiquitin-protein ligase activity	GO:0005634 GO:0031372	UBC13-MMS2 complex; nucleus
Glyma.09G124900	qESP-9-1	NA	NA	NA	NA	NA	NA
Glyma.09G125000	qESP-9-1	GO:0000478 GO:0006364 GO:0009220 GO:0009793	embryo development ending in seed dormancy; endonucleolytic cleavage involved in rRNA processing; pyrimidine ribonucleotide biosynthetic process; rRNA processing	GO:0003674	molecular function	GO:0005634 GO:0005654 GO:0005730 GO:0016020	membrane; nucleolus; nucleoplasm; nucleus
Glyma.09G125100	qESP-9-1	GO:0000478 GO:0006364 GO:0009220 GO:0009793	embryo development ending in seed dormancy; endonucleolytic cleavage involved in rRNA processing; pyrimidine ribonucleotide biosynthetic process; rRNA processing	GO:0003674	molecular function	GO:0005634 GO:0005654 GO:0005730 GO:0016020	membrane; nucleolus; nucleoplasm; nucleus
Glyma.09G125200	qESP-9-1	NA	NA	NA	NA	NA	NA
Glyma.09G125300	qESP-9-1	GO:0000478 GO:0006364 GO:0009220 GO:0009793	embryo development ending in seed dormancy; endonucleolytic cleavage involved in rRNA processing; pyrimidine ribonucleotide biosynthetic process; rRNA processing	GO:0003674	molecular function	GO:0005634 GO:0005654 GO:0005730 GO:0016020	membrane; nucleolus; nucleoplasm; nucleus
Glyma.09G125400	qESP-9-1	GO:0006355	regulation of transcription, DNA-dependent	GO:0003677 GO:0008270	DNA binding; zinc ion binding	GO:0005634	nucleus
Glyma.09G125500	qESP-9-1	NA	NA	NA	NA	NA	NA
Glyma.09G125600	qESP-9-1	GO:0008150	biological process	GO:0016757	transferase activity, transferring glycosyl groups	GO:0005739	mitochondrion
Glyma.09G125700	qESP-9-1	NA	NA	NA	NA	NA	NA
Glyma.09G125800	qESP-9-1	GO:0008150 GO:0009073 GO:0010207 GO:0016226 GO:0045893	aromatic amino acid family biosynthetic process; biological process; iron-sulfur cluster assembly; photosystem II assembly; positive regulation of transcription, DNA-dependent	GO:0003674	molecular function	GO:0009507	chloroplast
Glyma.09G125900	qESP-9-1	GO:0007165	signal transduction	NA	NA	GO:0005886	plasma membrane
Glyma.09G126000	qESP-9-1	NA	NA	NA	NA	NA	NA
Glyma.09G126100	qESP-9-1	NA	NA	NA	NA	GO:0005739	mitochondrion
Glyma.09G126200	qESP-9-1	GO:0005975 GO:0009409 GO:0009611 GO:0009642 GO:0009651 GO:0010228 GO:0016926 GO:0042631 GO:0050665	carbohydrate metabolic process; cellular response to water deprivation; hydrogen peroxide biosynthetic process; protein desumoylation; response to cold; response to light intensity; response to salt stress; response to wounding; vegetative to reproductive phase transition of meristem	GO:0003824 GO:0004553 GO:0043169	catalytic activity; cation binding; hydrolase activity, hydrolyzing O-glycosyl compounds	GO:0005576	extracellular region
Glyma.09G126300	qESP-9-1	GO:0006096 GO:0006629 GO:0006633 GO:0010431 GO:0046686 GO:0048316	fatty acid biosynthetic process; glycolysis; lipid metabolic process; response to cadmium ion; seed development; seed maturation	GO:0000287 GO:0003824 GO:0004743 GO:0030955	catalytic activity; magnesium ion binding; potassium ion binding; pyruvate kinase activity	GO:0005739 GO:0009507 GO:0009570	chloroplast; chloroplast stroma; mitochondrion
Glyma.09G126400	qESP-9-1	GO:0008150 GO:0009741	biological process; response to brassinosteroid stimulus	GO:0003674	molecular function	GO:0005634	nucleus
Glyma.09G126500	qESP-9-1	GO:0006598 GO:0006873 GO:0009698 GO:0010167 GO:0015706 GO:0042398 GO:0055085	cellular ion homeostasis; cellular modified amino acid biosynthetic process; nitrate transport; phenylpropanoid metabolic process; polyamine catabolic process; response to nitrate; transmembrane transport	GO:0005215	transporter activity	GO:0005886 GO:0016021	integral to membrane; plasma membrane
Glyma.09G126600	qESP-9-1	GO:0006816 GO:0007030 GO:0008150 GO:0009651	Golgi organization; biological process; calcium ion transport; response to salt stress	NA	NA	NA	NA
Glyma.09G126700	qESP-9-1	GO:0008150	biological process	GO:0046983	protein dimerization activity	GO:0005634 GO:0009506	nucleus; plasmodesma
Glyma.09G126800	qESP-9-1	GO:0008150	biological process	GO:0003674	molecular function	GO:0005634	nucleus
Glyma.09G126900	qESP-9-1	GO:0006598 GO:0006873 GO:0009698 GO:0010167 GO:0015706 GO:0042398 GO:0055085	cellular ion homeostasis; cellular modified amino acid biosynthetic process; nitrate transport; phenylpropanoid metabolic process; polyamine catabolic process; response to nitrate; transmembrane transport	GO:0005215	transporter activity	GO:0005886 GO:0016021	integral to membrane; plasma membrane
Glyma.09G127000	qESP-9-1	NA	NA	GO:0000166 GO:0005524 GO:0016887 GO:0017111	ATP binding; ATPase activity; nucleoside-triphosphatase activity; nucleotide binding	GO:0005886	plasma membrane
Glyma.09G127100	qESP-9-1	GO:0002679 GO:0006355 GO:0009407 GO:0010200 GO:0010583 GO:0016036 GO:0035556 GO:0043090 GO:0045892 GO:0080169	amino acid import; cellular response to boron-containing substance deprivation; cellular response to phosphate starvation; intracellular signal transduction; negative regulation of transcription, DNA-dependent; regulation of transcription, DNA-dependent; respiratory burst involved in defense response; response to chitin; response to cyclopentenone; toxin catabolic process	GO:0003700 GO:0005515 GO:0043565 GO:0044212	protein binding; sequence-specific DNA binding; sequence-specific DNA binding transcription factor activity; transcription regulatory region DNA binding	GO:0005634	nucleus
Glyma.09G127200	qESP-9-1	GO:0008152	metabolic process	GO:0008194 GO:0016757 GO:0016758 GO:0080043 GO:0080044 GO:0080045 GO:0080046	UDP-glycosyltransferase activity; quercetin 3'-O-glucosyltransferase activity; quercetin 3-O-glucosyltransferase activity; quercetin 4'-O-glucosyltransferase activity; quercetin 7-O-glucosyltransferase activity; transferase activity, transferring glycosyl groups; transferase activity, transferring hexosyl groups	GO:0005634 GO:0005829	cytosol; nucleus
Glyma.09G127300	qESP-9-1	GO:0008152	metabolic process	GO:0008194 GO:0016757 GO:0016758 GO:0080043 GO:0080044 GO:0080045 GO:0080046	UDP-glycosyltransferase activity; quercetin 3'-O-glucosyltransferase activity; quercetin 3-O-glucosyltransferase activity; quercetin 4'-O-glucosyltransferase activity; quercetin 7-O-glucosyltransferase activity; transferase activity, transferring glycosyl groups; transferase activity, transferring hexosyl groups	GO:0005634 GO:0005829	cytosol; nucleus
Glyma.09G127400	qESP-9-1	GO:0009793	embryo development ending in seed dormancy	GO:0003674	molecular function	GO:0009507	chloroplast
Glyma.09G127500	qESP-9-1	GO:0006520 GO:0006526 GO:0008652 GO:0046686 GO:0048481 GO:0055114	arginine biosynthetic process; cellular amino acid biosynthetic process; cellular amino acid metabolic process; ovule development; oxidation-reduction process; response to cadmium ion	GO:0000166 GO:0003942 GO:0005507 GO:0016620 GO:0046983 GO:0051287	N-acetyl-gamma-glutamyl-phosphate reductase activity; NAD binding; copper ion binding; nucleotide binding; oxidoreductase activity, acting on the aldehyde or oxo group of donors, NAD or NADP as acceptor; protein dimerization activity	GO:0005730 GO:0005737 GO:0009507 GO:0009570 GO:0016020	chloroplast; chloroplast stroma; cytoplasm; membrane; nucleolus
Glyma.09G127600	qESP-9-1	GO:0006857 GO:0010039 GO:0010043 GO:0055085	oligopeptide transport; response to iron ion; response to zinc ion; transmembrane transport	GO:0015198	oligopeptide transporter activity	GO:0005886	plasma membrane
Glyma.09G127700	qESP-9-1	GO:0008152	metabolic process	GO:0008194 GO:0016757 GO:0016758 GO:0080043 GO:0080044 GO:0080045 GO:0080046	UDP-glycosyltransferase activity; quercetin 3'-O-glucosyltransferase activity; quercetin 3-O-glucosyltransferase activity; quercetin 4'-O-glucosyltransferase activity; quercetin 7-O-glucosyltransferase activity; transferase activity, transferring glycosyl groups; transferase activity, transferring hexosyl groups	GO:0005634 GO:0005829	cytosol; nucleus
Glyma.09G127800	qESP-9-1	GO:0006094 GO:0006096 GO:0006168 GO:0007623 GO:0009651 GO:0009690 GO:0046686	adenine salvage; circadian rhythm; cytokinin metabolic process; gluconeogenesis; glycolysis; response to cadmium ion; response to salt stress	GO:0003999	adenine phosphoribosyltransferase activity	GO:0005737 GO:0005794 GO:0005829 GO:0005886 GO:0009505 GO:0009507 GO:0009570	Golgi apparatus; chloroplast; chloroplast stroma; cytoplasm; cytosol; plant-type cell wall; plasma membrane
Glyma.09G127900	qESP-9-1	GO:0008150	biological process	GO:0003674	molecular function	GO:0009507	chloroplast
Glyma.09G128000	qESP-9-1	GO:0006793 GO:0006812 GO:0006814 GO:0006816 GO:0006874 GO:0006882 GO:0009624 GO:0010351 GO:0030026 GO:0051592 GO:0055062 GO:0055085	calcium ion transport; cation transport; cellular calcium ion homeostasis; cellular manganese ion homeostasis; cellular zinc ion homeostasis; lithium ion transport; phosphate ion homeostasis; phosphorus metabolic process; response to calcium ion; response to nematode; sodium ion transport; transmembrane transport	GO:0005515 GO:0008324 GO:0015368 GO:0015369 GO:0015491	calcium:cation antiporter activity; calcium:hydrogen antiporter activity; cation:cation antiporter activity; cation transmembrane transporter activity; protein binding	GO:0005773 GO:0005774 GO:0009705 GO:0016021	integral to membrane; plant-type vacuole membrane; vacuolar membrane; vacuole
Glyma.09G128100	qESP-9-1	GO:0001510	RNA methylation	GO:0000166 GO:0005525	GTP binding; nucleotide binding	GO:0005634 GO:0016020	membrane; nucleus
Glyma.09G128200	qESP-9-1	GO:0008152	metabolic process	GO:0008194 GO:0016757 GO:0016758 GO:0080043 GO:0080044 GO:0080045 GO:0080046	UDP-glycosyltransferase activity; quercetin 3'-O-glucosyltransferase activity; quercetin 3-O-glucosyltransferase activity; quercetin 4'-O-glucosyltransferase activity; quercetin 7-O-glucosyltransferase activity; transferase activity, transferring glycosyl groups; transferase activity, transferring hexosyl groups	GO:0005634 GO:0005829	cytosol; nucleus
Glyma.09G128300	qESP-9-1	GO:0008152	metabolic process	GO:0008194 GO:0016757 GO:0016758 GO:0080043 GO:0080044 GO:0080045 GO:0080046	UDP-glycosyltransferase activity; quercetin 3'-O-glucosyltransferase activity; quercetin 3-O-glucosyltransferase activity; quercetin 4'-O-glucosyltransferase activity; quercetin 7-O-glucosyltransferase activity; transferase activity, transferring glycosyl groups; transferase activity, transferring hexosyl groups	GO:0005634 GO:0005829	cytosol; nucleus
Glyma.09G128400	qESP-9-1	GO:0008152	metabolic process	GO:0008194 GO:0016757 GO:0016758 GO:0080043 GO:0080044 GO:0080045 GO:0080046	UDP-glycosyltransferase activity; quercetin 3'-O-glucosyltransferase activity; quercetin 3-O-glucosyltransferase activity; quercetin 4'-O-glucosyltransferase activity; quercetin 7-O-glucosyltransferase activity; transferase activity, transferring glycosyl groups; transferase activity, transferring hexosyl groups	GO:0005634 GO:0005829	cytosol; nucleus
Glyma.09G128500	qESP-9-1	GO:0055085	transmembrane transport	GO:0003674	molecular function	GO:0005794 GO:0016021	Golgi apparatus; integral to membrane
Glyma.09G128600	qESP-9-1	GO:0006812 GO:0006814 GO:0010351 GO:0055085	cation transport; lithium ion transport; sodium ion transport; transmembrane transport	GO:0005451 GO:0015299	monovalent cation:hydrogen antiporter activity; solute:hydrogen antiporter activity	GO:0016021	integral to membrane
Glyma.09G128700	qESP-9-1	GO:0009791	post-embryonic development	GO:0003677 GO:0046983	DNA binding; protein dimerization activity	GO:0005634 GO:0005829	cytosol; nucleus
Glyma.09G128800	qESP-9-1	GO:0000165 GO:0006511 GO:0006612 GO:0009408 GO:0009595 GO:0009697 GO:0009734 GO:0009793 GO:0009853 GO:0009862 GO:0009863 GO:0009867 GO:0010187 GO:0010200 GO:0010310 GO:0010363 GO:0030163 GO:0031348 GO:0042742 GO:0043069 GO:0043900 GO:0050832 GO:0051707 GO:0051788 GO:0080129 GO:2000072	MAPK cascade; auxin mediated signaling pathway; defense response to bacterium; defense response to fungus; detection of biotic stimulus; embryo development ending in seed dormancy; jasmonic acid mediated signaling pathway; negative regulation of defense response; negative regulation of programmed cell death; negative regulation of seed germination; photorespiration; proteasome core complex assemb…	GO:0005515	protein binding	GO:0005634 GO:0005737 GO:0005829 GO:0019005	SCF ubiquitin ligase complex; cytoplasm; cytosol; nucleus
Glyma.09G128900	qESP-9-1	GO:0008150	biological process	GO:0003674	molecular function	GO:0005634	nucleus
Glyma.09G129000	qESP-9-1	GO:0006098 GO:0006511 GO:0009651 GO:0009853 GO:0022904 GO:0051788 GO:0080129	pentose-phosphate shunt; photorespiration; proteasome core complex assembly; respiratory electron transport chain; response to misfolded protein; response to salt stress; ubiquitin-dependent protein catabolic process	GO:0016651	oxidoreductase activity, acting on NAD(P)H	GO:0005739 GO:0005743 GO:0005747 GO:0009507 GO:0016020 GO:0031966 GO:0045271	chloroplast; membrane; mitochondrial inner membrane; mitochondrial membrane; mitochondrial respiratory chain complex I; mitochondrion; respiratory chain complex I
Glyma.09G129100	qESP-9-1	GO:0006355 GO:0007263 GO:0009739 GO:0042742 GO:0045892	defense response to bacterium; negative regulation of transcription, DNA-dependent; nitric oxide mediated signal transduction; regulation of transcription, DNA-dependent; response to gibberellin stimulus	GO:0003700 GO:0005515 GO:0043565	protein binding; sequence-specific DNA binding; sequence-specific DNA binding transcription factor activity	GO:0005634	nucleus
Glyma.09G129200	qESP-9-1	NA	NA	NA	NA	NA	NA
Glyma.09G129300	qESP-9-1	GO:0008150 GO:0009165	biological process; nucleotide biosynthetic process	GO:0003674	molecular function	GO:0005575	cellular component
Glyma.09G129400	qESP-9-1	GO:0009793	embryo development ending in seed dormancy	GO:0003674	molecular function	GO:0005739	mitochondrion
Glyma.09G129500	qESP-9-1	GO:0008150	biological process	GO:0003674	molecular function	GO:0005634	nucleus
Glyma.09G129600	qESP-9-1	GO:0006260	DNA replication	GO:0003896	DNA primase activity	GO:0005634	nucleus
Glyma.09G129700	qESP-9-1	GO:0008150	biological process	GO:0003674	molecular function	GO:0005886	plasma membrane
Glyma.09G129800	qESP-9-1	GO:0006499	N-terminal protein myristoylation	GO:0003674	molecular function	GO:0005634	nucleus
Glyma.09G129900	qESP-9-1	GO:0008150	biological process	GO:0003674	molecular function	GO:0005886	plasma membrane
Glyma.09G130000	qESP-9-1	GO:0008150	biological process	GO:0003674	molecular function	GO:0005886	plasma membrane
Glyma.09G130100	qESP-9-1	GO:0008150	biological process	GO:0003674	molecular function	GO:0005634	nucleus
Glyma.09G130200	qESP-9-1	GO:0008150	biological process	GO:0003674	molecular function	GO:0005634	nucleus
Glyma.09G130300	qESP-9-1	GO:0008150	biological process	GO:0003674	molecular function	GO:0005886	plasma membrane
Glyma.09G130400	qESP-9-1	GO:0030001	metal ion transport	GO:0046872	metal ion binding	GO:0005634	nucleus
Glyma.09G130500	qESP-9-1	GO:0030001	metal ion transport	GO:0046872	metal ion binding	GO:0005634	nucleus
Glyma.09G130600	qESP-9-1	GO:0030001	metal ion transport	GO:0046872	metal ion binding	GO:0005634	nucleus
Glyma.09G130700	qESP-9-1	NA	NA	NA	NA	NA	NA
Glyma.09G130800	qESP-9-1	GO:0030001	metal ion transport	GO:0046872	metal ion binding	GO:0005634	nucleus
Glyma.09G130900	qESP-9-1	GO:0030001	metal ion transport	GO:0046872	metal ion binding	GO:0005634	nucleus
Glyma.09G131000	qESP-9-1	GO:0009733 GO:0010044	response to aluminum ion; response to auxin stimulus	GO:0003674	molecular function	GO:0005737 GO:0005886	cytoplasm; plasma membrane
Glyma.09G131100	qESP-9-1	GO:0030001	metal ion transport	GO:0046872	metal ion binding	GO:0005634	nucleus
Glyma.09G131200	qESP-9-1	GO:0030001	metal ion transport	GO:0046872	metal ion binding	GO:0005634	nucleus
Glyma.09G131300	qESP-9-1	NA	NA	NA	NA	NA	NA
Glyma.09G131400	qESP-9-1	GO:0006355 GO:0009651 GO:0009723 GO:0009737 GO:0009739 GO:0009751 GO:0009753 GO:0046686	regulation of transcription, DNA-dependent; response to abscisic acid stimulus; response to cadmium ion; response to ethylene stimulus; response to gibberellin stimulus; response to jasmonic acid stimulus; response to salicylic acid stimulus; response to salt stress	GO:0003677 GO:0003700	DNA binding; sequence-specific DNA binding transcription factor activity	GO:0005634	nucleus
Glyma.09G131500	qESP-9-1	GO:0006457 GO:0009408 GO:0009644 GO:0009816 GO:0042542 GO:0042742 GO:0046685	defense response to bacterium; defense response to bacterium, incompatible interaction; protein folding; response to arsenic-containing substance; response to heat; response to high light intensity; response to hydrogen peroxide	GO:0005515 GO:0005524 GO:0051082	ATP binding; protein binding; unfolded protein binding	GO:0005618 GO:0005737 GO:0005829 GO:0005886	cell wall; cytoplasm; cytosol; plasma membrane
Glyma.09G131600	qESP-9-1	GO:0009723 GO:0017186 GO:0031348	negative regulation of defense response; peptidyl-pyroglutamic acid biosynthetic process, using glutaminyl-peptide cyclotransferase; response to ethylene stimulus	GO:0003824 GO:0016603	catalytic activity; glutaminyl-peptide cyclotransferase activity	GO:0005886 GO:0009507	chloroplast; plasma membrane
Glyma.09G131700	qESP-9-1	GO:0008150	biological process	GO:0003674	molecular function	GO:0005634	nucleus
Glyma.09G131800	qESP-9-1	GO:0009723 GO:0017186 GO:0031348	negative regulation of defense response; peptidyl-pyroglutamic acid biosynthetic process, using glutaminyl-peptide cyclotransferase; response to ethylene stimulus	GO:0003824 GO:0016603	catalytic activity; glutaminyl-peptide cyclotransferase activity	GO:0005886 GO:0009507	chloroplast; plasma membrane
Glyma.09G131900	qESP-9-1	GO:0009723 GO:0017186 GO:0031348	negative regulation of defense response; peptidyl-pyroglutamic acid biosynthetic process, using glutaminyl-peptide cyclotransferase; response to ethylene stimulus	GO:0003824 GO:0016603	catalytic activity; glutaminyl-peptide cyclotransferase activity	GO:0005886 GO:0009507	chloroplast; plasma membrane
Glyma.09G132000	qESP-9-1	NA	NA	NA	NA	NA	NA
Glyma.09G132100	qESP-9-1	GO:0005975	carbohydrate metabolic process	GO:0004650	polygalacturonase activity	NA	NA
Glyma.09G132200	qESP-9-1	GO:0006633 GO:0016119 GO:0016123 GO:0055114	carotene metabolic process; fatty acid biosynthetic process; oxidation-reduction process; xanthophyll biosynthetic process	GO:0005506 GO:0010291 GO:0016491	carotene beta-ring hydroxylase activity; iron ion binding; oxidoreductase activity	GO:0009507	chloroplast
Glyma.09G132300	qESP-9-1	GO:0000918 GO:0006200 GO:0010020	ATP catabolic process; barrier septum site selection; chloroplast fission	GO:0005515 GO:0016887 GO:0030899 GO:0042803	ATPase activity; calcium-dependent ATPase activity; protein binding; protein homodimerization activity	GO:0009507 GO:0009570 GO:0009941	chloroplast; chloroplast envelope; chloroplast stroma
Glyma.09G132400	qESP-9-1	GO:0000271 GO:0009825 GO:0009932 GO:0010817 GO:0016051 GO:0030243 GO:0043481 GO:0048765 GO:0048767 GO:0055114 GO:0071555	anthocyanin accumulation in tissues in response to UV light; carbohydrate biosynthetic process; cell tip growth; cell wall organization; cellulose metabolic process; multidimensional cell growth; oxidation-reduction process; polysaccharide biosynthetic process; regulation of hormone levels; root hair cell differentiation; root hair elongation	GO:0005507 GO:0016491	copper ion binding; oxidoreductase activity	GO:0005576 GO:0005618 GO:0005774 GO:0005886 GO:0009505 GO:0009506 GO:0016020 GO:0031225 GO:0046658 GO:0048046	anchored to membrane; anchored to plasma membrane; apoplast; cell wall; extracellular region; membrane; plant-type cell wall; plasma membrane; plasmodesma; vacuolar membrane
Glyma.09G132500	qESP-9-1	NA	NA	NA	NA	NA	NA
Glyma.09G132600	qESP-9-1	NA	NA	NA	NA	GO:0005739	mitochondrion
Glyma.09G132700	qESP-9-1	GO:0008150	biological process	NA	NA	GO:0005739	mitochondrion
Glyma.09G132800	qESP-9-1	GO:0008150	biological process	GO:0003674	molecular function	GO:0005737	cytoplasm
Glyma.09G132900	qESP-9-1	NA	NA	NA	NA	NA	NA
Glyma.09G133000	qESP-9-1	GO:0006468 GO:0051510	protein phosphorylation; regulation of unidimensional cell growth	GO:0004672 GO:0004674 GO:0005524 GO:0016301 GO:0016772	ATP binding; kinase activity; protein kinase activity; protein serine/threonine kinase activity; transferase activity, transferring phosphorus-containing groups	GO:0005886 GO:0009506	plasma membrane; plasmodesma
Glyma.09G133100	qESP-9-1	GO:0008150	biological process	GO:0003674	molecular function	GO:0005575	cellular component
Glyma.09G133200	qESP-9-1	GO:0006418 GO:0006433 GO:0009553 GO:0009658 GO:0009793 GO:0010027 GO:0010109 GO:0010228 GO:0016226 GO:0048316 GO:0048481	chloroplast organization; embryo development ending in seed dormancy; embryo sac development; iron-sulfur cluster assembly; ovule development; prolyl-tRNA aminoacylation; regulation of photosynthesis; seed development; tRNA aminoacylation for protein translation; thylakoid membrane organization; vegetative to reproductive phase transition of meristem	GO:0000166 GO:0004812 GO:0004827 GO:0005524	ATP binding; aminoacyl-tRNA ligase activity; nucleotide binding; proline-tRNA ligase activity	GO:0005737 GO:0005739 GO:0009507 GO:0009570	chloroplast; chloroplast stroma; cytoplasm; mitochondrion
Glyma.09G133300	qESP-9-1	GO:0006457	protein folding	GO:0031072	heat shock protein binding	GO:0005634 GO:0009507 GO:0009536	chloroplast; nucleus; plastid
Glyma.09G133400	qESP-9-1	GO:0008150	biological process	GO:0003677 GO:0046983	DNA binding; protein dimerization activity	GO:0005634	nucleus
Glyma.09G133500	qESP-9-1	GO:0008150	biological process	GO:0003676 GO:0008270	nucleic acid binding; zinc ion binding	GO:0005634	nucleus
Glyma.09G133600	qESP-9-1	GO:0006355	regulation of transcription, DNA-dependent	GO:0003700	sequence-specific DNA binding transcription factor activity	GO:0005634 GO:0005737	cytoplasm; nucleus
Glyma.09G133700	qESP-9-1	GO:0009791	post-embryonic development	GO:0003677 GO:0046983	DNA binding; protein dimerization activity	GO:0005634 GO:0005829	cytosol; nucleus
Glyma.09G133800	qESP-9-1	NA	NA	GO:0030247	polysaccharide binding	GO:0009507	chloroplast
Glyma.09G133900	qESP-9-1	NA	NA	NA	NA	NA	NA
Glyma.09G134000	qESP-9-1	GO:0006855 GO:0009860 GO:0030048 GO:0055085	actin filament-based movement; drug transmembrane transport; pollen tube growth; transmembrane transport	GO:0005215 GO:0015238 GO:0015297	antiporter activity; drug transmembrane transporter activity; transporter activity	GO:0005886 GO:0016020	membrane; plasma membrane
Glyma.09G134100	qESP-9-1	GO:0006855 GO:0009860 GO:0030048 GO:0055085	actin filament-based movement; drug transmembrane transport; pollen tube growth; transmembrane transport	GO:0005215 GO:0015238 GO:0015297	antiporter activity; drug transmembrane transporter activity; transporter activity	GO:0005886 GO:0016020	membrane; plasma membrane
Glyma.09G134200	qESP-9-1	GO:0006855 GO:0009860 GO:0030048 GO:0055085	actin filament-based movement; drug transmembrane transport; pollen tube growth; transmembrane transport	GO:0005215 GO:0015238 GO:0015297	antiporter activity; drug transmembrane transporter activity; transporter activity	GO:0005886 GO:0016020	membrane; plasma membrane
Glyma.09G134300	qESP-9-1	GO:0006886	intracellular protein transport	GO:0003674	molecular function	GO:0005794 GO:0005801 GO:0005829 GO:0016020	Golgi apparatus; cis-Golgi network; cytosol; membrane
Glyma.09G134400	qESP-9-1	GO:0006952 GO:0007165	defense response; signal transduction	GO:0043531	ADP binding	GO:0005622 GO:0005737	cytoplasm; intracellular
Glyma.09G134500	qESP-9-1	GO:0008150	biological process	GO:0003674	molecular function	GO:0005575	cellular component
Glyma.09G134600	qESP-9-1	GO:0009793 GO:0010090 GO:0010143 GO:0048730 GO:0051179	cutin biosynthetic process; embryo development ending in seed dormancy; epidermis morphogenesis; localization; trichome morphogenesis	GO:0016740 GO:0016747	transferase activity; transferase activity, transferring acyl groups other than amino-acyl groups	GO:0005737	cytoplasm
Glyma.09G134700	qESP-9-1	GO:0008150	biological process	GO:0003674	molecular function	GO:0005634	nucleus
Glyma.09G134800	qESP-9-1	GO:0015746 GO:0055085	citrate transport; transmembrane transport	GO:0005215 GO:0015137	citrate transmembrane transporter activity; transporter activity	GO:0016021	integral to membrane
Glyma.09G134900	qESP-9-1	GO:0015746 GO:0055085	citrate transport; transmembrane transport	GO:0005215 GO:0015137	citrate transmembrane transporter activity; transporter activity	GO:0016021	integral to membrane
Glyma.09G135000	qESP-9-1	GO:0015746 GO:0055085	citrate transport; transmembrane transport	GO:0005215 GO:0015137	citrate transmembrane transporter activity; transporter activity	GO:0016021	integral to membrane
Glyma.09G135100	qESP-9-1	GO:0007155 GO:0009793 GO:0010090 GO:0010103 GO:0010229 GO:0045010 GO:0048765 GO:0071555	actin nucleation; cell adhesion; cell wall organization; embryo development ending in seed dormancy; inflorescence development; root hair cell differentiation; stomatal complex morphogenesis; trichome morphogenesis	GO:0004672 GO:0005524 GO:0016301 GO:0016772	ATP binding; kinase activity; protein kinase activity; transferase activity, transferring phosphorus-containing groups	GO:0005737	cytoplasm
Glyma.09G135200	qESP-9-1	GO:0008152	metabolic process	GO:0000166 GO:0016491	nucleotide binding; oxidoreductase activity	GO:0009507	chloroplast
Glyma.09G135300	qESP-9-1	GO:0008152	metabolic process	GO:0000166 GO:0016491	nucleotide binding; oxidoreductase activity	GO:0009507	chloroplast
Glyma.09G135400	qESP-9-1	NA	NA	NA	NA	NA	NA
Glyma.09G135500	qESP-9-1	GO:0005975	carbohydrate metabolic process	GO:0003824 GO:0004553 GO:0043169	catalytic activity; cation binding; hydrolase activity, hydrolyzing O-glycosyl compounds	GO:0005575	cellular component
Glyma.09G135600	qESP-9-1	NA	NA	NA	NA	NA	NA
Glyma.09G135700	qESP-9-1	GO:0008152	metabolic process	GO:0000166 GO:0016491	nucleotide binding; oxidoreductase activity	GO:0009507	chloroplast
Glyma.09G135800	qESP-9-1	GO:0008152	metabolic process	GO:0000166 GO:0016491	nucleotide binding; oxidoreductase activity	GO:0009507	chloroplast
Glyma.09G135900	qESP-9-1	GO:0008152	metabolic process	GO:0000166 GO:0016491	nucleotide binding; oxidoreductase activity	GO:0009507	chloroplast
Glyma.09G136000	qESP-9-1	GO:0006511	ubiquitin-dependent protein catabolic process	GO:0004842	ubiquitin-protein ligase activity	GO:0005634 GO:0019005	SCF ubiquitin ligase complex; nucleus
Glyma.09G136100	qESP-9-1	GO:0008150	biological process	GO:0003674	molecular function	GO:0005783	endoplasmic reticulum
Glyma.09G136200	qESP-9-1	GO:0008150	biological process	GO:0003676 GO:0008270	nucleic acid binding; zinc ion binding	GO:0005622 GO:0005634 GO:0005886	intracellular; nucleus; plasma membrane
Glyma.09G136300	qESP-9-1	NA	NA	NA	NA	NA	NA
Glyma.09G136400	qESP-9-1	GO:0000226 GO:0000911 GO:0007018 GO:0008283 GO:0051225	cell proliferation; cytokinesis by cell plate formation; microtubule-based movement; microtubule cytoskeleton organization; spindle assembly	GO:0003777 GO:0005524	ATP binding; microtubule motor activity	GO:0005794	Golgi apparatus
Glyma.09G136500	qESP-9-1	GO:0008150	biological process	GO:0003674	molecular function	GO:0005634	nucleus
Glyma.09G136600	qESP-9-1	GO:0055114	oxidation-reduction process	GO:0005506 GO:0016705 GO:0031418	L-ascorbic acid binding; iron ion binding; oxidoreductase activity, acting on paired donors, with incorporation or reduction of molecular oxygen	GO:0005576	extracellular region
Glyma.09G136700	qESP-9-1	GO:0006629 GO:0016042	lipid catabolic process; lipid metabolic process	GO:0004091 GO:0004806 GO:0005516	calmodulin binding; carboxylesterase activity; triglyceride lipase activity	GO:0005576	extracellular region
Glyma.09G136800	qESP-9-1	NA	NA	NA	NA	GO:0005739 GO:0009507 GO:0009535 GO:0009536 GO:0009941	chloroplast; chloroplast envelope; chloroplast thylakoid membrane; mitochondrion; plastid
Glyma.09G136900	qESP-9-1	GO:0000278 GO:0006306 GO:0006342 GO:0006378 GO:0006379 GO:0006396 GO:0006397 GO:0007267 GO:0009220 GO:0009616 GO:0009640 GO:0009793 GO:0010267 GO:0010388 GO:0016569 GO:0031047 GO:0035194 GO:0035196	DNA methylation; RNA processing; cell-cell signaling; chromatin silencing; covalent chromatin modification; cullin deneddylation; embryo development ending in seed dormancy; gene silencing by RNA; mRNA cleavage; mRNA polyadenylation; mRNA processing; mitotic cell cycle; photomorphogenesis; posttranscriptional gene silencing by RNA; production of miRNAs involved in gene silencing by miRNA; product…	GO:0003677 GO:0005515 GO:0016787	DNA binding; hydrolase activity; protein binding	GO:0005634 GO:0005847 GO:0009506	mRNA cleavage and polyadenylation specificity factor complex; nucleus; plasmodesma
Glyma.09G137000	qESP-9-1	GO:0009414 GO:0010118 GO:0010167 GO:0042128	nitrate assimilation; response to nitrate; response to water deprivation; stomatal movement	GO:0003700	sequence-specific DNA binding transcription factor activity	GO:0005634	nucleus
Glyma.09G137100	qESP-9-1	NA	NA	GO:0008270	zinc ion binding	GO:0005618	cell wall
Glyma.09G137200	qESP-9-1	GO:0006508 GO:0008152 GO:0009630	gravitropism; metabolic process; proteolysis	GO:0004252 GO:0008240	serine-type endopeptidase activity; tripeptidyl-peptidase activity	GO:0005737 GO:0005773 GO:0005774 GO:0009507 GO:0016020 GO:0022626	chloroplast; cytoplasm; cytosolic ribosome; membrane; vacuolar membrane; vacuole
Glyma.09G137300	qESP-9-1	GO:0006508 GO:0008152 GO:0009630	gravitropism; metabolic process; proteolysis	GO:0004252 GO:0008240	serine-type endopeptidase activity; tripeptidyl-peptidase activity	GO:0005737 GO:0005773 GO:0005774 GO:0009507 GO:0016020 GO:0022626	chloroplast; cytoplasm; cytosolic ribosome; membrane; vacuolar membrane; vacuole
Glyma.09G137400	qESP-9-1	GO:0006355 GO:0046685 GO:0048573	photoperiodism, flowering; regulation of transcription, DNA-dependent; response to arsenic-containing substance	GO:0003677 GO:0003700	DNA binding; sequence-specific DNA binding transcription factor activity	GO:0005634	nucleus
Glyma.09G137500	qESP-9-1	GO:0006508 GO:0008152 GO:0009630	gravitropism; metabolic process; proteolysis	GO:0004252 GO:0008240	serine-type endopeptidase activity; tripeptidyl-peptidase activity	GO:0005737 GO:0005773 GO:0005774 GO:0009507 GO:0016020 GO:0022626	chloroplast; cytoplasm; cytosolic ribosome; membrane; vacuolar membrane; vacuole
Glyma.09G137600	qESP-9-1	GO:0055114	oxidation-reduction process	GO:0005506 GO:0009055 GO:0016705 GO:0019825 GO:0020037	electron carrier activity; heme binding; iron ion binding; oxidoreductase activity, acting on paired donors, with incorporation or reduction of molecular oxygen; oxygen binding	NA	NA
Glyma.09G137700	qESP-9-1	GO:0006952 GO:0031408	defense response; oxylipin biosynthetic process	GO:0004392 GO:0004497 GO:0005509 GO:0071614	calcium ion binding; heme oxygenase (decyclizing) activity; linoleic acid epoxygenase activity; monooxygenase activity	GO:0016021	integral to membrane
Glyma.09G137800	qESP-9-1	GO:0008150	biological process	GO:0003674	molecular function	GO:0005634	nucleus
Glyma.09G137900	qESP-9-1	NA	NA	NA	NA	NA	NA
Glyma.09G138000	qESP-9-1	GO:0008150	biological process	GO:0003674	molecular function	NA	NA
Glyma.09G138100	qESP-9-1	GO:0010030 GO:0010167 GO:0010214 GO:0015706 GO:0033611 GO:0046482 GO:0046686 GO:0050832	defense response to fungus; nitrate transport; oxalate catabolic process; para-aminobenzoic acid metabolic process; positive regulation of seed germination; response to cadmium ion; response to nitrate; seed coat development	GO:0016208 GO:0050203	AMP binding; oxalate-CoA ligase activity	GO:0005737 GO:0005739 GO:0009506 GO:0009507 GO:0009570 GO:0048046	apoplast; chloroplast; chloroplast stroma; cytoplasm; mitochondrion; plasmodesma
Glyma.09G138200	qESP-9-1	NA	NA	NA	NA	NA	NA
Glyma.09G138300	qESP-9-1	GO:0008150	biological process	GO:0003674	molecular function	GO:0005576 GO:0005768 GO:0005794 GO:0005802	Golgi apparatus; endosome; extracellular region; trans-Golgi network
Glyma.09G138400	qESP-9-1	GO:0006098 GO:0006354 GO:0006364 GO:0006412 GO:0009657 GO:0009793 GO:0010207 GO:0019288	DNA-dependent transcription, elongation; embryo development ending in seed dormancy; isopentenyl diphosphate biosynthetic process, mevalonate-independent pathway; pentose-phosphate shunt; photosystem II assembly; plastid organization; rRNA processing; translation	GO:0003735 GO:0019843	rRNA binding; structural constituent of ribosome	GO:0005622 GO:0005840 GO:0009507 GO:0009570 GO:0009941 GO:0015934 GO:0016020	chloroplast; chloroplast envelope; chloroplast stroma; intracellular; large ribosomal subunit; membrane; ribosome
Glyma.09G138500	qESP-9-1	GO:0006825 GO:0030001	copper ion transport; metal ion transport	GO:0005507 GO:0046872	copper ion binding; metal ion binding	GO:0005794	Golgi apparatus
Glyma.09G138600	qESP-9-1	NA	NA	GO:0046872	metal ion binding	GO:0005575	cellular component
Glyma.09G138700	qESP-9-1	GO:0006007 GO:0006096 GO:0006098 GO:0006508 GO:0009060 GO:0009651 GO:0046686	aerobic respiration; glucose catabolic process; glycolysis; pentose-phosphate shunt; proteolysis; response to cadmium ion; response to salt stress	GO:0003824 GO:0004222 GO:0005524 GO:0008270 GO:0046872	ATP binding; catalytic activity; metal ion binding; metalloendopeptidase activity; zinc ion binding	GO:0005739 GO:0005750 GO:0005774 GO:0009507 GO:0009536 GO:0016020	chloroplast; membrane; mitochondrial respiratory chain complex III; mitochondrion; plastid; vacuolar membrane
Glyma.09G138800	qESP-9-1	GO:0006863 GO:0008150	biological process; purine nucleobase transport	GO:0003674	molecular function	NA	NA
Glyma.09G138900	qESP-9-1	GO:0008150	biological process	GO:0003676 GO:0008270	nucleic acid binding; zinc ion binding	GO:0005634	nucleus
Glyma.09G139000	qESP-9-1	GO:0006355 GO:0009639 GO:0009751 GO:0010018 GO:0045893	far-red light signaling pathway; positive regulation of transcription, DNA-dependent; regulation of transcription, DNA-dependent; response to red or far red light; response to salicylic acid stimulus	GO:0003677 GO:0003700 GO:0005515	DNA binding; protein binding; sequence-specific DNA binding transcription factor activity	GO:0005634	nucleus
Glyma.09G139100	qESP-9-1	GO:0008150	biological process	GO:0003674	molecular function	GO:0005634	nucleus
Glyma.09G139200	qESP-9-1	GO:0008150 GO:0042546	biological process; cell wall biogenesis	GO:0003677	DNA binding	GO:0005634	nucleus
Glyma.09G139300	qESP-9-1	GO:0008150	biological process	GO:0003674	molecular function	GO:0005575	cellular component
Glyma.09G139400	qESP-9-1	GO:0000712	resolution of meiotic recombination intermediates	GO:0003674	molecular function	GO:0009506	plasmodesma
Glyma.09G139500	qESP-9-1	NA	NA	NA	NA	NA	NA
Glyma.09G139600	qESP-9-1	GO:0009409 GO:0009414 GO:0009651 GO:0009737 GO:0009738 GO:0010150	abscisic acid mediated signaling pathway; leaf senescence; response to abscisic acid stimulus; response to cold; response to salt stress; response to water deprivation	GO:0003674	molecular function	GO:0005737	cytoplasm
Glyma.09G139700	qESP-9-1	GO:0006888 GO:0008150	ER to Golgi vesicle-mediated transport; biological process	GO:0003674	molecular function	GO:0005634	nucleus
Glyma.09G139800	qESP-9-1	GO:0008150	biological process	GO:0003674	molecular function	GO:0005634	nucleus
Glyma.09G139900	qESP-9-1	GO:0006888 GO:0008150	ER to Golgi vesicle-mediated transport; biological process	GO:0003674	molecular function	GO:0005634	nucleus
Glyma.09G140000	qESP-9-1	GO:0046686	response to cadmium ion	NA	NA	GO:0005634	nucleus
Glyma.09G140100	qESP-9-1	GO:0008150	biological process	GO:0003674	molecular function	GO:0005634	nucleus
Glyma.09G140200	qESP-9-1	NA	NA	NA	NA	GO:0005634	nucleus
Glyma.09G140300	qESP-9-1	GO:0009684 GO:0009723 GO:0042742 GO:0048523	defense response to bacterium; indoleacetic acid biosynthetic process; negative regulation of cellular process; response to ethylene stimulus	GO:0020037	heme binding	GO:0005634 GO:0005783 GO:0005886 GO:0009535	chloroplast thylakoid membrane; endoplasmic reticulum; nucleus; plasma membrane
Glyma.09G140400	qESP-9-1	NA	NA	NA	NA	NA	NA
Glyma.09G140500	qESP-9-1	NA	NA	NA	NA	NA	NA
Glyma.09G140600	qESP-9-1	GO:0008150	biological process	GO:0005515	protein binding	GO:0005634	nucleus
Glyma.09G140700	qESP-9-1	GO:0002679 GO:0009814 GO:0009816 GO:0010200 GO:0016567 GO:0035556	defense response, incompatible interaction; defense response to bacterium, incompatible interaction; intracellular signal transduction; protein ubiquitination; respiratory burst involved in defense response; response to chitin	GO:0004842 GO:0008270	ubiquitin-protein ligase activity; zinc ion binding	GO:0005576 GO:0005886	extracellular region; plasma membrane
Glyma.09G140800	qESP-9-1	GO:0002679 GO:0009814 GO:0009816 GO:0010200 GO:0016567 GO:0035556	defense response, incompatible interaction; defense response to bacterium, incompatible interaction; intracellular signal transduction; protein ubiquitination; respiratory burst involved in defense response; response to chitin	GO:0004842 GO:0008270	ubiquitin-protein ligase activity; zinc ion binding	GO:0005576 GO:0005886	extracellular region; plasma membrane
Glyma.09G140900	qESP-9-1	GO:0009407	toxin catabolic process	GO:0004364	glutathione transferase activity	GO:0005737	cytoplasm
Glyma.09G141000	qESP-9-1	NA	NA	GO:0016788	hydrolase activity, acting on ester bonds	GO:0005575	cellular component
Glyma.09G141100	qESP-9-1	GO:0007059 GO:0007129 GO:0007131 GO:0042138	chromosome segregation; meiotic DNA double-strand break formation; reciprocal meiotic recombination; synapsis	NA	NA	GO:0005634	nucleus
Glyma.09G141200	qESP-9-1	GO:0008150	biological process	GO:0003674	molecular function	GO:0005634	nucleus
Glyma.09G141300	qESP-9-1	GO:0008150	biological process	GO:0003674	molecular function	GO:0005634	nucleus
Glyma.09G141400	qESP-9-1	GO:0008150	biological process	GO:0003674	molecular function	GO:0005634	nucleus
Glyma.09G141500	qESP-9-1	GO:0008150	biological process	GO:0003674	molecular function	GO:0005634	nucleus
Glyma.09G141600	qESP-9-1	GO:0007059 GO:0007129 GO:0007131 GO:0042138	chromosome segregation; meiotic DNA double-strand break formation; reciprocal meiotic recombination; synapsis	NA	NA	GO:0005634	nucleus
Glyma.09G141700	qESP-9-1	GO:0007059 GO:0007129 GO:0007131 GO:0042138	chromosome segregation; meiotic DNA double-strand break formation; reciprocal meiotic recombination; synapsis	NA	NA	GO:0005634	nucleus
Glyma.09G141800	qESP-9-1	GO:0008150	biological process	GO:0003674	molecular function	GO:0005634	nucleus
Glyma.09G141900	qESP-9-1	GO:0008150 GO:0009688	abscisic acid biosynthetic process; biological process	GO:0003723	RNA binding	GO:0005634	nucleus
Glyma.09G142000	qESP-9-1	GO:0008150	biological process	GO:0003674	molecular function	GO:0005634	nucleus
Glyma.09G142100	qESP-9-1	GO:0009966 GO:0043666 GO:0080163	regulation of phosphoprotein phosphatase activity; regulation of protein serine/threonine phosphatase activity; regulation of signal transduction	GO:0004864	protein phosphatase inhibitor activity	GO:0005634	nucleus
Glyma.09G142200	qESP-9-1	GO:0055114	oxidation-reduction process	GO:0005506 GO:0009055 GO:0016705 GO:0019825 GO:0020037	electron carrier activity; heme binding; iron ion binding; oxidoreductase activity, acting on paired donors, with incorporation or reduction of molecular oxygen; oxygen binding	NA	NA
Glyma.09G142300	qESP-9-1	GO:0055114	oxidation-reduction process	GO:0005506 GO:0009055 GO:0016705 GO:0019825 GO:0020037	electron carrier activity; heme binding; iron ion binding; oxidoreductase activity, acting on paired donors, with incorporation or reduction of molecular oxygen; oxygen binding	NA	NA
Glyma.09G142400	qESP-9-1	GO:0000226 GO:0000911 GO:0006306 GO:0006342 GO:0006346 GO:0007018 GO:0009909 GO:0016458 GO:0031047 GO:0031048 GO:0034968 GO:0048451 GO:0048453 GO:0051567	DNA methylation; chromatin silencing; chromatin silencing by small RNA; cytokinesis by cell plate formation; gene silencing; gene silencing by RNA; histone H3-K9 methylation; histone lysine methylation; methylation-dependent chromatin silencing; microtubule-based movement; microtubule cytoskeleton organization; petal formation; regulation of flower development; sepal formation	GO:0003777 GO:0005524	ATP binding; microtubule motor activity	GO:0005737	cytoplasm
Glyma.09G142500	qESP-9-1	GO:0055114	oxidation-reduction process	GO:0005506 GO:0009055 GO:0016705 GO:0019825 GO:0020037	electron carrier activity; heme binding; iron ion binding; oxidoreductase activity, acting on paired donors, with incorporation or reduction of molecular oxygen; oxygen binding	NA	NA
Glyma.09G142600	qESP-9-1	GO:0000398 GO:0008150	biological process; mRNA splicing, via spliceosome	GO:0000166 GO:0003676 GO:0003723	RNA binding; nucleic acid binding; nucleotide binding	GO:0005634 GO:0009507 GO:0009570	chloroplast; chloroplast stroma; nucleus
Glyma.09G142700	qESP-9-1	GO:0055114	oxidation-reduction process	GO:0005506 GO:0009055 GO:0016705 GO:0019825 GO:0020037	electron carrier activity; heme binding; iron ion binding; oxidoreductase activity, acting on paired donors, with incorporation or reduction of molecular oxygen; oxygen binding	GO:0005576 GO:0005794	Golgi apparatus; extracellular region
Glyma.09G142800	qESP-9-1	GO:0055114	oxidation-reduction process	GO:0005506 GO:0009055 GO:0016705 GO:0020037	electron carrier activity; heme binding; iron ion binding; oxidoreductase activity, acting on paired donors, with incorporation or reduction of molecular oxygen	GO:0005576	extracellular region
Glyma.09G142900	qESP-9-1	GO:0055114	oxidation-reduction process	GO:0005506 GO:0009055 GO:0016705 GO:0019825 GO:0020037	electron carrier activity; heme binding; iron ion binding; oxidoreductase activity, acting on paired donors, with incorporation or reduction of molecular oxygen; oxygen binding	NA	NA
Glyma.09G143000	qESP-9-1	NA	NA	NA	NA	NA	NA
Glyma.09G143100	qESP-9-1	GO:0000038 GO:0006633 GO:0008152 GO:0009409 GO:0042335 GO:0055114	cuticle development; fatty acid biosynthetic process; metabolic process; oxidation-reduction process; response to cold; very long-chain fatty acid metabolic process	GO:0000166 GO:0004316 GO:0005507 GO:0016491 GO:0051287	3-oxoacyl-[acyl-carrier-protein] reductase (NADPH) activity; NAD binding; copper ion binding; nucleotide binding; oxidoreductase activity	GO:0009507 GO:0009536 GO:0009570 GO:0009941	chloroplast; chloroplast envelope; chloroplast stroma; plastid
Glyma.09G143200	qESP-9-1	GO:0002679 GO:0006355 GO:0010200 GO:0035556	intracellular signal transduction; regulation of transcription, DNA-dependent; respiratory burst involved in defense response; response to chitin	GO:0003677 GO:0003700 GO:0043565	DNA binding; sequence-specific DNA binding; sequence-specific DNA binding transcription factor activity	GO:0005634	nucleus
Glyma.09G143300	qESP-9-1	GO:0006508	proteolysis	GO:0004185	serine-type carboxypeptidase activity	GO:0005576 GO:0009505 GO:0009506	extracellular region; plant-type cell wall; plasmodesma
Glyma.09G143400	qESP-9-1	GO:0010190 GO:0010207	cytochrome b6f complex assembly; photosystem II assembly	GO:0003674	molecular function	GO:0009507	chloroplast
Glyma.09G143500	qESP-9-1	GO:0000041 GO:0009910 GO:0010228	negative regulation of flower development; transition metal ion transport; vegetative to reproductive phase transition of meristem	GO:0008429	phosphatidylethanolamine binding	GO:0005634 GO:0005737	cytoplasm; nucleus
Glyma.09G143600	qESP-9-1	GO:0006499 GO:0016567	N-terminal protein myristoylation; protein ubiquitination	GO:0004842 GO:0008270	ubiquitin-protein ligase activity; zinc ion binding	GO:0005737	cytoplasm
Glyma.09G143700	qESP-9-1	GO:0006473 GO:0042335 GO:0043481 GO:0048364 GO:0048765	anthocyanin accumulation in tissues in response to UV light; cuticle development; protein acetylation; root development; root hair cell differentiation	GO:0003700 GO:0043565	sequence-specific DNA binding; sequence-specific DNA binding transcription factor activity	GO:0005634	nucleus
Glyma.09G143800	qESP-9-1	GO:0006508	proteolysis	GO:0004252	serine-type endopeptidase activity	GO:0005794 GO:0009506 GO:0016021	Golgi apparatus; integral to membrane; plasmodesma
Glyma.09G143900	qESP-9-1	NA	NA	GO:0005516	calmodulin binding	GO:0005634	nucleus
Glyma.09G144000	qESP-9-1	GO:0006869	lipid transport	GO:0008289	lipid binding	GO:0005576	extracellular region
Glyma.09G144100	qESP-9-1	GO:0009791	post-embryonic development	GO:0003677 GO:0046983	DNA binding; protein dimerization activity	GO:0005634 GO:0005829	cytosol; nucleus
Glyma.09G144200	qESP-9-1	GO:0010054	trichoblast differentiation	GO:0008168	methyltransferase activity	GO:0005794	Golgi apparatus
Glyma.09G144300	qESP-9-1	GO:0006569 GO:0009684 GO:0055114	indoleacetic acid biosynthetic process; oxidation-reduction process; tryptophan catabolic process	GO:0005506 GO:0009055 GO:0016705 GO:0020037	electron carrier activity; heme binding; iron ion binding; oxidoreductase activity, acting on paired donors, with incorporation or reduction of molecular oxygen	NA	NA
Glyma.09G144400	qESP-9-1	NA	NA	NA	NA	NA	NA
Glyma.09G144500	qESP-9-1	GO:0006091 GO:0006354 GO:0015979 GO:0019684	DNA-dependent transcription, elongation; generation of precursor metabolites and energy; photosynthesis; photosynthesis, light reaction	GO:0016168 GO:0046872	chlorophyll binding; metal ion binding	GO:0009507 GO:0009522 GO:0009534 GO:0009535 GO:0009538 GO:0009579 GO:0009941 GO:0010287 GO:0016020 GO:0016021	chloroplast; chloroplast envelope; chloroplast thylakoid; chloroplast thylakoid membrane; integral to membrane; membrane; photosystem I; photosystem I reaction center; plastoglobule; thylakoid
Glyma.09G144600	qESP-9-1	GO:0005975 GO:0006096 GO:0006970 GO:0009409 GO:0009651	carbohydrate metabolic process; glycolysis; response to cold; response to osmotic stress; response to salt stress	GO:0004340 GO:0004396 GO:0005524 GO:0008865 GO:0016773	ATP binding; fructokinase activity; glucokinase activity; hexokinase activity; phosphotransferase activity, alcohol group as acceptor	GO:0009507	chloroplast
Glyma.09G144700	qESP-9-1	GO:0009414 GO:0009611 GO:0009867 GO:0042538 GO:0055114	hyperosmotic salinity response; jasmonic acid mediated signaling pathway; oxidation-reduction process; response to water deprivation; response to wounding	GO:0016491 GO:0016706	oxidoreductase activity; oxidoreductase activity, acting on paired donors, with incorporation or reduction of molecular oxygen, 2-oxoglutarate as one donor, and incorporation of one atom each of oxygen into both donors	GO:0005737	cytoplasm
Glyma.09G144800	qESP-9-1	GO:0009414 GO:0009611 GO:0009867 GO:0042538 GO:0055114	hyperosmotic salinity response; jasmonic acid mediated signaling pathway; oxidation-reduction process; response to water deprivation; response to wounding	GO:0016491 GO:0016706	oxidoreductase activity; oxidoreductase activity, acting on paired donors, with incorporation or reduction of molecular oxygen, 2-oxoglutarate as one donor, and incorporation of one atom each of oxygen into both donors	GO:0005737	cytoplasm
Glyma.09G144900	qESP-9-1	GO:0009414 GO:0009611 GO:0009867 GO:0042538 GO:0055114	hyperosmotic salinity response; jasmonic acid mediated signaling pathway; oxidation-reduction process; response to water deprivation; response to wounding	GO:0016491 GO:0016706	oxidoreductase activity; oxidoreductase activity, acting on paired donors, with incorporation or reduction of molecular oxygen, 2-oxoglutarate as one donor, and incorporation of one atom each of oxygen into both donors	GO:0005737	cytoplasm
Glyma.09G145000	qESP-9-1	GO:0009414 GO:0009611 GO:0009867 GO:0042538 GO:0055114	hyperosmotic salinity response; jasmonic acid mediated signaling pathway; oxidation-reduction process; response to water deprivation; response to wounding	GO:0016491 GO:0016706	oxidoreductase activity; oxidoreductase activity, acting on paired donors, with incorporation or reduction of molecular oxygen, 2-oxoglutarate as one donor, and incorporation of one atom each of oxygen into both donors	GO:0005737	cytoplasm
Glyma.09G145100	qESP-9-1	GO:0009414 GO:0009611 GO:0009867 GO:0042538 GO:0055114	hyperosmotic salinity response; jasmonic acid mediated signaling pathway; oxidation-reduction process; response to water deprivation; response to wounding	GO:0016491 GO:0016706	oxidoreductase activity; oxidoreductase activity, acting on paired donors, with incorporation or reduction of molecular oxygen, 2-oxoglutarate as one donor, and incorporation of one atom each of oxygen into both donors	GO:0005737	cytoplasm
Glyma.09G145200	qESP-9-1	GO:0009414 GO:0009611 GO:0009867 GO:0042538 GO:0055114	hyperosmotic salinity response; jasmonic acid mediated signaling pathway; oxidation-reduction process; response to water deprivation; response to wounding	GO:0016491 GO:0016706	oxidoreductase activity; oxidoreductase activity, acting on paired donors, with incorporation or reduction of molecular oxygen, 2-oxoglutarate as one donor, and incorporation of one atom each of oxygen into both donors	GO:0005737	cytoplasm
Glyma.09G145300	qESP-9-1	GO:0000041 GO:0009691 GO:0055114	cytokinin biosynthetic process; oxidation-reduction process; transition metal ion transport	GO:0009815 GO:0016491 GO:0016706	1-aminocyclopropane-1-carboxylate oxidase activity; oxidoreductase activity; oxidoreductase activity, acting on paired donors, with incorporation or reduction of molecular oxygen, 2-oxoglutarate as one donor, and incorporation of one atom each of oxygen into both donors	GO:0005737	cytoplasm
Glyma.09G145400	qESP-9-1	GO:0009414 GO:0009611 GO:0009867 GO:0042538 GO:0055114	hyperosmotic salinity response; jasmonic acid mediated signaling pathway; oxidation-reduction process; response to water deprivation; response to wounding	GO:0016491 GO:0016706	oxidoreductase activity; oxidoreductase activity, acting on paired donors, with incorporation or reduction of molecular oxygen, 2-oxoglutarate as one donor, and incorporation of one atom each of oxygen into both donors	GO:0005737	cytoplasm
Glyma.09G145500	qESP-9-1	NA	NA	GO:0015171	amino acid transmembrane transporter activity	GO:0005774 GO:0005886	plasma membrane; vacuolar membrane
Glyma.09G145600	qESP-9-1	GO:0002237 GO:0006952 GO:0007165 GO:0010103 GO:0048443	defense response; response to molecule of bacterial origin; signal transduction; stamen development; stomatal complex morphogenesis	GO:0016301	kinase activity	NA	NA
Glyma.09G145700	qESP-9-1	GO:0006499 GO:0009611 GO:0009744 GO:0009750	N-terminal protein myristoylation; response to fructose stimulus; response to sucrose stimulus; response to wounding	GO:0005515 GO:0030246	carbohydrate binding; protein binding	GO:0005634	nucleus
Glyma.09G145800	qESP-9-1	GO:0008150	biological process	GO:0003674	molecular function	GO:0005634	nucleus
Glyma.09G145900	qESP-9-1	NA	NA	NA	NA	NA	NA
Glyma.09G146000	qESP-9-1	GO:0009790 GO:0048467 GO:0048481	embryo development; gynoecium development; ovule development	GO:0003674	molecular function	GO:0005634	nucleus
Glyma.09G146100	qESP-9-1	NA	NA	NA	NA	GO:0005634	nucleus
Glyma.09G146200	qESP-9-1	GO:0009790 GO:0048467 GO:0048481	embryo development; gynoecium development; ovule development	GO:0003674	molecular function	GO:0005634	nucleus
Glyma.09G146300	qESP-9-1	GO:0005992 GO:0008152 GO:0046686	metabolic process; response to cadmium ion; trehalose biosynthetic process	GO:0003824 GO:0004805	catalytic activity; trehalose-phosphatase activity	GO:0005634 GO:0005737	cytoplasm; nucleus
Glyma.09G146400	qESP-9-1	GO:0000272 GO:0005982 GO:0006468 GO:0007169 GO:0007389 GO:0008356 GO:0008361 GO:0009664 GO:0009832 GO:0009926 GO:0010015 GO:0010075 GO:0040007 GO:0048653	anther development; asymmetric cell division; auxin polar transport; growth; pattern specification process; plant-type cell wall biogenesis; plant-type cell wall organization; polysaccharide catabolic process; protein phosphorylation; regulation of cell size; regulation of meristem growth; root morphogenesis; starch metabolic process; transmembrane receptor protein tyrosine kinase signaling pathw…	GO:0004672 GO:0004674 GO:0005515 GO:0005524 GO:0016301 GO:0016772	ATP binding; kinase activity; protein binding; protein kinase activity; protein serine/threonine kinase activity; transferase activity, transferring phosphorus-containing groups	GO:0005886	plasma membrane
Glyma.09G146500	qESP-9-1	GO:0006833 GO:0009651 GO:0009750 GO:0030003 GO:0048767 GO:0070838	cellular cation homeostasis; divalent metal ion transport; response to fructose stimulus; response to salt stress; root hair elongation; water transport	GO:0051087	chaperone binding	GO:0005739	mitochondrion
Glyma.09G146600	qESP-9-1	NA	NA	NA	NA	NA	NA
Glyma.09G146700	qESP-9-1	GO:0006833 GO:0009651 GO:0009750 GO:0030003 GO:0048767 GO:0070838	cellular cation homeostasis; divalent metal ion transport; response to fructose stimulus; response to salt stress; root hair elongation; water transport	GO:0051087	chaperone binding	GO:0005739	mitochondrion
Glyma.09G146800	qESP-9-1	GO:0006855 GO:0055085	drug transmembrane transport; transmembrane transport	GO:0005215 GO:0015238 GO:0015297	antiporter activity; drug transmembrane transporter activity; transporter activity	GO:0005886 GO:0016020	membrane; plasma membrane
Glyma.09G146900	qESP-9-1	GO:0006355	regulation of transcription, DNA-dependent	GO:0003677 GO:0008270	DNA binding; zinc ion binding	GO:0005634	nucleus
Glyma.09G147000	qESP-9-1	NA	NA	NA	NA	NA	NA
Glyma.09G147100	qESP-9-1	GO:0007623 GO:0009723 GO:0009735 GO:0009736 GO:0009873 GO:0010029 GO:0010082 GO:0010119 GO:0010150 GO:0031537 GO:0048364 GO:0048831 GO:0071368 GO:0080113	cellular response to cytokinin stimulus; circadian rhythm; cytokinin mediated signaling pathway; ethylene mediated signaling pathway; leaf senescence; regulation of anthocyanin metabolic process; regulation of root meristem growth; regulation of seed germination; regulation of seed growth; regulation of shoot system development; regulation of stomatal movement; response to cytokinin stimulus; res…	GO:0000156 GO:0003700 GO:0005515	phosphorelay response regulator activity; protein binding; sequence-specific DNA binding transcription factor activity	GO:0005634	nucleus
Glyma.09G147200	qESP-9-1	GO:0006355	regulation of transcription, DNA-dependent	GO:0003677 GO:0003700	DNA binding; sequence-specific DNA binding transcription factor activity	GO:0005634	nucleus
Glyma.09G147300	qESP-9-1	GO:0008150	biological process	GO:0003674	molecular function	GO:0005794	Golgi apparatus
Glyma.09G147400	qESP-9-1	GO:0006200 GO:0006810 GO:0035672 GO:0055085	ATP catabolic process; oligopeptide transmembrane transport; transmembrane transport; transport	GO:0000166 GO:0005215 GO:0005524 GO:0015421 GO:0016887 GO:0017111 GO:0042626	ATP binding; ATPase activity; ATPase activity, coupled to transmembrane movement of substances; nucleoside-triphosphatase activity; nucleotide binding; oligopeptide-transporting ATPase activity; transporter activity	GO:0005886 GO:0009507 GO:0009941 GO:0016020 GO:0016021	chloroplast; chloroplast envelope; integral to membrane; membrane; plasma membrane
Glyma.09G147500	qESP-9-1	GO:0008150	biological process	GO:0003674	molecular function	GO:0009507	chloroplast
Glyma.09G147600	qESP-9-1	GO:0008150	biological process	GO:0003674	molecular function	GO:0005634	nucleus
Glyma.09G147700	qESP-9-1	NA	NA	NA	NA	NA	NA
Glyma.09G147800	qESP-9-1	GO:0006396 GO:0008033	RNA processing; tRNA processing	GO:0004808 GO:0016740	tRNA (5-methylaminomethyl-2-thiouridylate)-methyltransferase activity; transferase activity	GO:0005737 GO:0009507	chloroplast; cytoplasm
Glyma.09G147900	qESP-9-1	GO:0008150	biological process	GO:0003677 GO:0046983	DNA binding; protein dimerization activity	GO:0005634	nucleus
Glyma.09G148000	qESP-9-1	GO:0008150	biological process	GO:0003676 GO:0008270	nucleic acid binding; zinc ion binding	GO:0005737	cytoplasm
Glyma.09G148100	qESP-9-1	GO:0055114	oxidation-reduction process	GO:0000166 GO:0008270 GO:0016491	nucleotide binding; oxidoreductase activity; zinc ion binding	GO:0005737 GO:0005829 GO:0009506	cytoplasm; cytosol; plasmodesma
Glyma.09G148200	qESP-9-1	GO:0016998	cell wall macromolecule catabolic process	GO:0003674	molecular function	GO:0005576	extracellular region
Glyma.09G148300	qESP-9-1	GO:0016998	cell wall macromolecule catabolic process	GO:0003674	molecular function	NA	NA
Glyma.09G148400	qESP-9-1	GO:0008152	metabolic process	GO:0003824 GO:0030170	catalytic activity; pyridoxal phosphate binding	NA	NA
Glyma.09G148500	qESP-9-1	GO:0006084 GO:0008152 GO:0008299 GO:0019287	acetyl-CoA metabolic process; isopentenyl diphosphate biosynthetic process, mevalonate pathway; isoprenoid biosynthetic process; metabolic process	GO:0003824 GO:0004421	catalytic activity; hydroxymethylglutaryl-CoA synthase activity	GO:0005739 GO:0005829 GO:0009506	cytosol; mitochondrion; plasmodesma
Glyma.09G148600	qESP-9-1	GO:0006979 GO:0055114	oxidation-reduction process; response to oxidative stress	GO:0004601 GO:0020037	heme binding; peroxidase activity	GO:0005576	extracellular region
Glyma.09G148700	qESP-9-1	GO:0008150	biological process	GO:0003674	molecular function	GO:0005634	nucleus
Glyma.09G148800	qESP-9-1	NA	NA	NA	NA	NA	NA
Glyma.09G148900	qESP-9-1	GO:0006014 GO:0046686	D-ribose metabolic process; response to cadmium ion	GO:0004747 GO:0016301 GO:0016773	kinase activity; phosphotransferase activity, alcohol group as acceptor; ribokinase activity	GO:0005737 GO:0005829	cytoplasm; cytosol
Glyma.09G149000	qESP-9-1	GO:0006355 GO:0009911 GO:0010228 GO:0048437 GO:0048481	floral organ development; ovule development; positive regulation of flower development; regulation of transcription, DNA-dependent; vegetative to reproductive phase transition of meristem	GO:0003677 GO:0003700 GO:0005515	DNA binding; protein binding; sequence-specific DNA binding transcription factor activity	GO:0005634	nucleus
Glyma.09G149100	qESP-9-1	NA	NA	GO:0016788	hydrolase activity, acting on ester bonds	GO:0005575	cellular component
Glyma.09G149200	qESP-9-1	GO:0009686 GO:0009688 GO:0009737 GO:0009739 GO:0009740 GO:0009793 GO:0009826 GO:0009845 GO:0009908 GO:0010162 GO:0016114 GO:0048366 GO:0048575 GO:0048608 GO:0055114	abscisic acid biosynthetic process; embryo development ending in seed dormancy; flower development; gibberellic acid mediated signaling pathway; gibberellin biosynthetic process; leaf development; oxidation-reduction process; reproductive structure development; response to abscisic acid stimulus; response to gibberellin stimulus; seed dormancy process; seed germination; short-day photoperiodism, …	GO:0005506 GO:0016491 GO:0016706 GO:0045544	gibberellin 20-oxidase activity; iron ion binding; oxidoreductase activity; oxidoreductase activity, acting on paired donors, with incorporation or reduction of molecular oxygen, 2-oxoglutarate as one donor, and incorporation of one atom each of oxygen into both donors	GO:0005737	cytoplasm
Glyma.09G149300	qESP-9-1	GO:0008152	metabolic process	GO:0016787	hydrolase activity	GO:0005634	nucleus
Glyma.09G149400	qESP-9-1	GO:0008152	metabolic process	GO:0016787	hydrolase activity	GO:0005634	nucleus
Glyma.09G149500	qESP-9-1	GO:0000226 GO:0000280 GO:0000911 GO:0000914 GO:0006260 GO:0006270 GO:0006275 GO:0006306 GO:0006346 GO:0008283 GO:0010389 GO:0031048 GO:0042023 GO:0051225 GO:0051567 GO:0051726 GO:0055046 GO:0080175	DNA endoreduplication; DNA methylation; DNA replication; DNA replication initiation; cell proliferation; chromatin silencing by small RNA; cytokinesis by cell plate formation; histone H3-K9 methylation; methylation-dependent chromatin silencing; microgametogenesis; microtubule cytoskeleton organization; nuclear division; phragmoplast assembly; phragmoplast microtubule organization; regulation of …	GO:0003777 GO:0005515 GO:0008574	microtubule motor activity; plus-end-directed microtubule motor activity; protein binding	GO:0005737 GO:0009524	cytoplasm; phragmoplast
Glyma.09G149600	qESP-9-1	GO:0008152	metabolic process	GO:0016787	hydrolase activity	GO:0005634	nucleus
Glyma.09G149700	qESP-9-1	GO:0048445	carpel morphogenesis	GO:0016772	transferase activity, transferring phosphorus-containing groups	GO:0005634	nucleus
Glyma.09G149800	qESP-9-1	GO:0006468	protein phosphorylation	GO:0004672 GO:0004713 GO:0005524 GO:0016301 GO:0016772	ATP binding; kinase activity; protein kinase activity; protein tyrosine kinase activity; transferase activity, transferring phosphorus-containing groups	GO:0005886 GO:0009506	plasma membrane; plasmodesma
Glyma.09G149900	qESP-9-1	GO:0006355	regulation of transcription, DNA-dependent	GO:0003677 GO:0003700	DNA binding; sequence-specific DNA binding transcription factor activity	GO:0005634	nucleus
Glyma.09G150000	qESP-9-1	GO:0006355	regulation of transcription, DNA-dependent	GO:0003677 GO:0003700	DNA binding; sequence-specific DNA binding transcription factor activity	GO:0005634	nucleus
Glyma.09G150100	qESP-9-1	GO:0006468	protein phosphorylation	GO:0004672 GO:0004674 GO:0005524 GO:0016772	ATP binding; protein kinase activity; protein serine/threonine kinase activity; transferase activity, transferring phosphorus-containing groups	GO:0005886	plasma membrane
Glyma.09G150200	qESP-9-1	GO:0009617 GO:0010087 GO:0016337 GO:0045087	cell-cell adhesion; innate immune response; phloem or xylem histogenesis; response to bacterium	GO:0016757 GO:0016758 GO:0035251	UDP-glucosyltransferase activity; transferase activity, transferring glycosyl groups; transferase activity, transferring hexosyl groups	GO:0005739 GO:0005768 GO:0005794 GO:0005802 GO:0031227	Golgi apparatus; endosome; intrinsic to endoplasmic reticulum membrane; mitochondrion; trans-Golgi network
Glyma.09G150300	qESP-9-1	GO:0006508 GO:0008152 GO:0008356 GO:0043086	asymmetric cell division; metabolic process; negative regulation of catalytic activity; proteolysis	GO:0004252 GO:0042802	identical protein binding; serine-type endopeptidase activity	GO:0005618 GO:0048046	apoplast; cell wall
Glyma.09G150400	qESP-9-1	GO:0010200 GO:0050832	defense response to fungus; response to chitin	GO:0030246	carbohydrate binding	GO:0005618 GO:0005634 GO:0005886 GO:0009505 GO:0048046	apoplast; cell wall; nucleus; plant-type cell wall; plasma membrane
Glyma.09G150500	qESP-9-1	GO:0000041 GO:0006468 GO:0006826 GO:0010106 GO:0010167 GO:0010413 GO:0015706 GO:0045492	cellular response to iron ion starvation; glucuronoxylan metabolic process; iron ion transport; nitrate transport; protein phosphorylation; response to nitrate; transition metal ion transport; xylan biosynthetic process	GO:0004672 GO:0004674 GO:0005524 GO:0016301 GO:0016772	ATP binding; kinase activity; protein kinase activity; protein serine/threonine kinase activity; transferase activity, transferring phosphorus-containing groups	GO:0005576	extracellular region
Glyma.09G150600	qESP-9-1	NA	NA	NA	NA	NA	NA
Glyma.09G150700	qESP-9-1	NA	NA	NA	NA	NA	NA
Glyma.09G150800	qESP-9-1	NA	NA	NA	NA	NA	NA
Glyma.09G150900	qESP-9-1	NA	NA	NA	NA	NA	NA
Glyma.09G151000	qESP-9-1	NA	NA	NA	NA	NA	NA
Glyma.09G151100	qESP-9-1	NA	NA	NA	NA	NA	NA
Glyma.09G151200	qESP-9-1	NA	NA	NA	NA	NA	NA
Glyma.09G151300	qESP-9-1	GO:0006468 GO:0009738	abscisic acid mediated signaling pathway; protein phosphorylation	GO:0004672 GO:0004674 GO:0004683 GO:0005509 GO:0005524 GO:0016301 GO:0016772	ATP binding; calcium ion binding; calmodulin-dependent protein kinase activity; kinase activity; protein kinase activity; protein serine/threonine kinase activity; transferase activity, transferring phosphorus-containing groups	NA	NA
Glyma.09G151400	qESP-9-1	GO:0006468 GO:0006995	cellular response to nitrogen starvation; protein phosphorylation	GO:0004672 GO:0004674 GO:0004713 GO:0005524 GO:0016301 GO:0016772	ATP binding; kinase activity; protein kinase activity; protein serine/threonine kinase activity; protein tyrosine kinase activity; transferase activity, transferring phosphorus-containing groups	GO:0005886	plasma membrane
Glyma.09G151500	qESP-9-1	GO:0002237 GO:0009737	response to abscisic acid stimulus; response to molecule of bacterial origin	GO:0003674	molecular function	GO:0005576 GO:0005618 GO:0005773	cell wall; extracellular region; vacuole
Glyma.09G151600	qESP-9-1	GO:0008150	biological process	GO:0003677 GO:0003700	DNA binding; sequence-specific DNA binding transcription factor activity	GO:0005634	nucleus
Glyma.09G151700	qESP-9-1	GO:0006468 GO:0006995	cellular response to nitrogen starvation; protein phosphorylation	GO:0004672 GO:0004674 GO:0004713 GO:0005524 GO:0016301 GO:0016772	ATP binding; kinase activity; protein kinase activity; protein serine/threonine kinase activity; protein tyrosine kinase activity; transferase activity, transferring phosphorus-containing groups	GO:0005886	plasma membrane
Glyma.09G151800	qESP-9-1	GO:0006508	proteolysis	GO:0004222	metalloendopeptidase activity	GO:0005739 GO:0016020	membrane; mitochondrion
Glyma.09G151900	qESP-9-1	GO:0008150 GO:0009611 GO:0009695	biological process; jasmonic acid biosynthetic process; response to wounding	GO:0003674	molecular function	GO:0005774 GO:0031225	anchored to membrane; vacuolar membrane
Glyma.09G152000	qESP-9-1	GO:0006354 GO:0006412 GO:0009220	DNA-dependent transcription, elongation; pyrimidine ribonucleotide biosynthetic process; translation	GO:0003735	structural constituent of ribosome	GO:0005622 GO:0005840 GO:0009507 GO:0022627	chloroplast; cytosolic small ribosomal subunit; intracellular; ribosome
Glyma.09G152100	qESP-9-1	GO:0006098 GO:0010150 GO:0016556 GO:0055072 GO:0072593	iron ion homeostasis; leaf senescence; mRNA modification; pentose-phosphate shunt; reactive oxygen species metabolic process	GO:0051537	2 iron, 2 sulfur cluster binding	GO:0005739 GO:0009507 GO:0009570	chloroplast; chloroplast stroma; mitochondrion
Glyma.09G152200	qESP-9-1	NA	NA	NA	NA	NA	NA
Glyma.09G152300	qESP-9-1	GO:0006812 GO:0006813 GO:0006814 GO:0010351 GO:0055085	cation transport; lithium ion transport; potassium ion transport; sodium ion transport; transmembrane transport	GO:0015079 GO:0015299 GO:0015386	potassium:hydrogen antiporter activity; potassium ion transmembrane transporter activity; solute:hydrogen antiporter activity	GO:0016021	integral to membrane
Glyma.09G152400	qESP-9-1	GO:0001708 GO:0002237 GO:0006468 GO:0007165 GO:0009553 GO:0009827 GO:0009860 GO:0009886 GO:0009909 GO:0009965 GO:0010103 GO:0048441 GO:0048443 GO:0048481 GO:0048507	cell fate specification; embryo sac development; leaf morphogenesis; meristem development; ovule development; petal development; plant-type cell wall modification; pollen tube growth; post-embryonic morphogenesis; protein phosphorylation; regulation of flower development; response to molecule of bacterial origin; signal transduction; stamen development; stomatal complex morphogenesis	GO:0004672 GO:0004674 GO:0004713 GO:0005524 GO:0016301 GO:0016772	ATP binding; kinase activity; protein kinase activity; protein serine/threonine kinase activity; protein tyrosine kinase activity; transferase activity, transferring phosphorus-containing groups	GO:0005576 GO:0016020	extracellular region; membrane
Glyma.09G152500	qESP-9-1	GO:0008150	biological process	GO:0003674	molecular function	GO:0005634	nucleus
Glyma.09G152600	qESP-9-1	GO:0008150	biological process	GO:0003674	molecular function	GO:0005634 GO:0009507	chloroplast; nucleus
Glyma.09G152700	qESP-9-1	GO:0006520 GO:0009058 GO:0009693 GO:0042218	1-aminocyclopropane-1-carboxylate biosynthetic process; biosynthetic process; cellular amino acid metabolic process; ethylene biosynthetic process	GO:0003824 GO:0004069 GO:0008793 GO:0016740 GO:0016847 GO:0030170	1-aminocyclopropane-1-carboxylate synthase activity; L-aspartate:2-oxoglutarate aminotransferase activity; aromatic-amino-acid:2-oxoglutarate aminotransferase activity; catalytic activity; pyridoxal phosphate binding; transferase activity	GO:0005737	cytoplasm
Glyma.09G152800	qESP-9-1	GO:0006520 GO:0008295 GO:0010413 GO:0045492 GO:0055114	cellular amino acid metabolic process; glucuronoxylan metabolic process; oxidation-reduction process; spermidine biosynthetic process; xylan biosynthetic process	GO:0000166 GO:0016491	nucleotide binding; oxidoreductase activity	GO:0005737	cytoplasm
Glyma.09G152900	qESP-9-1	GO:0008150	biological process	NA	NA	GO:0005739	mitochondrion
Glyma.09G153000	qESP-9-1	NA	NA	NA	NA	NA	NA
Glyma.09G153100	qESP-9-1	GO:0006378 GO:0006379 GO:0006397 GO:0009909 GO:0016570 GO:0048449	floral organ formation; histone modification; mRNA cleavage; mRNA polyadenylation; mRNA processing; regulation of flower development	GO:0003676 GO:0005515	nucleic acid binding; protein binding	GO:0005634 GO:0005829	cytosol; nucleus
Glyma.09G153200	qESP-9-1	GO:0019538	protein metabolic process	GO:0005524	ATP binding	GO:0009507 GO:0009532 GO:0009570 GO:0009579 GO:0009941	chloroplast; chloroplast envelope; chloroplast stroma; plastid stroma; thylakoid
Glyma.09G153300	qESP-9-1	GO:0019538	protein metabolic process	GO:0005524	ATP binding	GO:0009507 GO:0009532 GO:0009570 GO:0009579 GO:0009941	chloroplast; chloroplast envelope; chloroplast stroma; plastid stroma; thylakoid
Glyma.09G153400	qESP-9-1	GO:0009791	post-embryonic development	GO:0003677 GO:0046983	DNA binding; protein dimerization activity	GO:0005634 GO:0005829	cytosol; nucleus
Glyma.09G153500	qESP-9-1	GO:0000226 GO:0000278 GO:0000280 GO:0000911 GO:0006275 GO:0006342 GO:0007000 GO:0007067 GO:0007129 GO:0007131 GO:0008283 GO:0009624 GO:0010389 GO:0010564 GO:0016572 GO:0042023 GO:0045010 GO:0046785 GO:0051225 GO:0051258 GO:0051322 GO:0051567 GO:0052096	DNA endoreduplication; actin nucleation; anaphase; cell proliferation; chromatin silencing; cytokinesis by cell plate formation; formation by symbiont of syncytium involving giant cell for nutrient acquisition from host; histone H3-K9 methylation; histone phosphorylation; microtubule cytoskeleton organization; microtubule polymerization; mitosis; mitotic cell cycle; nuclear division; nucleolus or…	GO:0008017	microtubule binding	GO:0005874 GO:0009524 GO:0009574 GO:0055028	cortical microtubule; microtubule; phragmoplast; preprophase band
Glyma.09G153600	qESP-9-1	GO:0006355	regulation of transcription, DNA-dependent	GO:0003677	DNA binding	GO:0005634	nucleus
Glyma.09G153700	qESP-9-1	NA	NA	NA	NA	NA	NA
Glyma.09G153800	qESP-9-1	NA	NA	NA	NA	NA	NA
Glyma.09G153900	qESP-9-1	GO:0006094 GO:0006096 GO:0006098 GO:0009409 GO:0009416 GO:0009651 GO:0009737 GO:0009853 GO:0046686	gluconeogenesis; glycolysis; pentose-phosphate shunt; photorespiration; response to abscisic acid stimulus; response to cadmium ion; response to cold; response to light stimulus; response to salt stress	GO:0000287 GO:0003677 GO:0004634 GO:0005507	DNA binding; copper ion binding; magnesium ion binding; phosphopyruvate hydratase activity	GO:0000015 GO:0005634 GO:0005737 GO:0005739 GO:0005740 GO:0005829 GO:0005886 GO:0009506 GO:0009507 GO:0016020 GO:0048046	apoplast; chloroplast; cytoplasm; cytosol; membrane; mitochondrial envelope; mitochondrion; nucleus; phosphopyruvate hydratase complex; plasma membrane; plasmodesma
Glyma.09G154000	qESP-9-1	NA	NA	GO:0004594	pantothenate kinase activity	GO:0005737	cytoplasm
Glyma.09G154100	qESP-9-1	NA	NA	NA	NA	GO:0009507	chloroplast
Glyma.09G154200	qESP-9-1	GO:0008150	biological process	GO:0003674	molecular function	GO:0005739	mitochondrion
Glyma.09G154300	qESP-9-1	NA	NA	NA	NA	NA	NA
Glyma.09G154400	qESP-9-1	GO:0006499	N-terminal protein myristoylation	NA	NA	GO:0005773 GO:0005774 GO:0005794 GO:0005886 GO:0009506 GO:0016020	Golgi apparatus; membrane; plasma membrane; plasmodesma; vacuolar membrane; vacuole
Glyma.09G154500	qESP-9-1	GO:0008150	biological process	GO:0003674	molecular function	GO:0005575	cellular component
Glyma.09G154600	qESP-9-1	GO:0006468 GO:0007169 GO:0010075	protein phosphorylation; regulation of meristem growth; transmembrane receptor protein tyrosine kinase signaling pathway	GO:0004672 GO:0004674 GO:0005524 GO:0016772	ATP binding; protein kinase activity; protein serine/threonine kinase activity; transferase activity, transferring phosphorus-containing groups	GO:0005886	plasma membrane
Glyma.09G154700	qESP-9-1	GO:0006364 GO:0009637 GO:0009644 GO:0009744 GO:0009765 GO:0010114 GO:0010155 GO:0010196 GO:0010218 GO:0015979 GO:0019344	cysteine biosynthetic process; nonphotochemical quenching; photosynthesis; photosynthesis, light harvesting; rRNA processing; regulation of proton transport; response to blue light; response to far red light; response to high light intensity; response to red light; response to sucrose stimulus	GO:0016168	chlorophyll binding	GO:0009507 GO:0009517 GO:0009533 GO:0009534 GO:0009535 GO:0009579 GO:0009783 GO:0010287 GO:0016020 GO:0030076	PSII associated light-harvesting complex II; chloroplast; chloroplast stromal thylakoid; chloroplast thylakoid; chloroplast thylakoid membrane; light-harvesting complex; membrane; photosystem II antenna complex; plastoglobule; thylakoid
Glyma.09G154800	qESP-9-1	GO:0008150	biological process	GO:0003674	molecular function	GO:0005575	cellular component
Glyma.09G154900	qESP-9-1	GO:0000373 GO:0009658 GO:0010468 GO:0015979	Group II intron splicing; chloroplast organization; photosynthesis; regulation of gene expression	GO:0003723 GO:0008270	RNA binding; zinc ion binding	GO:0005739 GO:0009507	chloroplast; mitochondrion
Glyma.09G155000	qESP-9-1	GO:0006661	phosphatidylinositol biosynthetic process	GO:0003674	molecular function	GO:0009507	chloroplast
Glyma.09G155100	qESP-9-1	GO:0009639 GO:0010228 GO:0016926 GO:0050665	hydrogen peroxide biosynthetic process; protein desumoylation; response to red or far red light; vegetative to reproductive phase transition of meristem	GO:0008270	zinc ion binding	GO:0005634	nucleus
Glyma.09G155200	qESP-9-1	GO:0006457	protein folding	GO:0000166 GO:0005524 GO:0016887 GO:0017111 GO:0051082	ATP binding; ATPase activity; nucleoside-triphosphatase activity; nucleotide binding; unfolded protein binding	GO:0005739	mitochondrion
Glyma.09G155300	qESP-9-1	NA	NA	NA	NA	NA	NA
Glyma.09G155400	qESP-9-1	GO:0006457	protein folding	GO:0031072 GO:0051082	heat shock protein binding; unfolded protein binding	GO:0005737	cytoplasm
Glyma.09G155500	qESP-9-1	GO:0006457 GO:0009408 GO:0009644 GO:0010167 GO:0015706 GO:0034976 GO:0042542	nitrate transport; protein folding; response to endoplasmic reticulum stress; response to heat; response to high light intensity; response to hydrogen peroxide; response to nitrate	GO:0004866	endopeptidase inhibitor activity	GO:0005576 GO:0005618 GO:0048046	apoplast; cell wall; extracellular region
Glyma.09G155600	qESP-9-1	GO:0008150	biological process	NA	NA	GO:0005634	nucleus
Glyma.09G155700	qESP-9-1	GO:0006364 GO:0009902 GO:0010027 GO:0010207 GO:0034660 GO:0035304 GO:0042793 GO:0045893	chloroplast relocation; ncRNA metabolic process; photosystem II assembly; positive regulation of transcription, DNA-dependent; rRNA processing; regulation of protein dephosphorylation; thylakoid membrane organization; transcription from plastid promoter	GO:0003674	molecular function	GO:0005886 GO:0009507	chloroplast; plasma membrane
Glyma.09G155800	qESP-9-1	NA	NA	NA	NA	NA	NA
Glyma.09G155900	qESP-9-1	GO:0006354 GO:0006412 GO:0006511 GO:0009853 GO:0051788 GO:0080129	DNA-dependent transcription, elongation; photorespiration; proteasome core complex assembly; response to misfolded protein; translation; ubiquitin-dependent protein catabolic process	GO:0003723 GO:0003735 GO:0016740	RNA binding; structural constituent of ribosome; transferase activity	GO:0005622 GO:0005840 GO:0009507 GO:0015934	chloroplast; intracellular; large ribosomal subunit; ribosome
Glyma.09G156000	qESP-9-1	GO:0080156	mitochondrial mRNA modification	GO:0003676 GO:0004386 GO:0005524	ATP binding; helicase activity; nucleic acid binding	GO:0005739	mitochondrion
Glyma.09G156100	qESP-9-1	GO:0006944 GO:0008150 GO:0010200 GO:0048193	Golgi vesicle transport; biological process; cellular membrane fusion; response to chitin	GO:0003677 GO:0008270	DNA binding; zinc ion binding	GO:0005634 GO:0009506	nucleus; plasmodesma
Glyma.09G156200	qESP-9-1	GO:0048268	clathrin coat assembly	GO:0005543 GO:0005545 GO:0030276	1-phosphatidylinositol binding; clathrin binding; phospholipid binding	GO:0030118	clathrin coat
Glyma.09G156300	qESP-9-1	GO:0006415 GO:0006783	heme biosynthetic process; translational termination	GO:0003747	translation release factor activity	GO:0009507	chloroplast
Glyma.09G156400	qESP-9-1	GO:0055114	oxidation-reduction process	GO:0016491 GO:0016706	oxidoreductase activity; oxidoreductase activity, acting on paired donors, with incorporation or reduction of molecular oxygen, 2-oxoglutarate as one donor, and incorporation of one atom each of oxygen into both donors	NA	NA
Glyma.09G156500	qESP-9-1	NA	NA	GO:0016279 GO:0018024	histone-lysine N-methyltransferase activity; protein-lysine N-methyltransferase activity	GO:0005634 GO:0005783 GO:0009506	endoplasmic reticulum; nucleus; plasmodesma
Glyma.09G156600	qESP-9-1	GO:0001510 GO:0006412 GO:0009651	RNA methylation; response to salt stress; translation	GO:0003723 GO:0003735	RNA binding; structural constituent of ribosome	GO:0005622 GO:0005730 GO:0005737 GO:0005829 GO:0005840 GO:0009506 GO:0015935 GO:0016020 GO:0022626 GO:0022627	cytoplasm; cytosol; cytosolic ribosome; cytosolic small ribosomal subunit; intracellular; membrane; nucleolus; plasmodesma; ribosome; small ribosomal subunit
Glyma.09G156700	qESP-9-1	GO:0006598 GO:0006979 GO:0009698 GO:0010167 GO:0015706 GO:0042398 GO:0055114	cellular modified amino acid biosynthetic process; nitrate transport; oxidation-reduction process; phenylpropanoid metabolic process; polyamine catabolic process; response to nitrate; response to oxidative stress	GO:0004601 GO:0020037	heme binding; peroxidase activity	GO:0005576	extracellular region
Glyma.09G156800	qESP-9-1	GO:0000394 GO:0006661 GO:0006810 GO:0009086 GO:0016192	RNA splicing, via endonucleolytic cleavage and ligation; methionine biosynthetic process; phosphatidylinositol biosynthetic process; transport; vesicle-mediated transport	GO:0003674	molecular function	GO:0005739 GO:0016021	integral to membrane; mitochondrion
Glyma.09G156900	qESP-9-1	GO:0006725 GO:0055114	cellular aromatic compound metabolic process; oxidation-reduction process	GO:0008198 GO:0008270 GO:0016491 GO:0016701	ferrous iron binding; oxidoreductase activity; oxidoreductase activity, acting on single donors with incorporation of molecular oxygen; zinc ion binding	GO:0005737	cytoplasm
Glyma.09G157000	qESP-9-1	GO:0006725 GO:0055114	cellular aromatic compound metabolic process; oxidation-reduction process	GO:0008198 GO:0008270 GO:0016491 GO:0016701	ferrous iron binding; oxidoreductase activity; oxidoreductase activity, acting on single donors with incorporation of molecular oxygen; zinc ion binding	GO:0005737	cytoplasm
Glyma.09G157100	qESP-9-1	GO:0006725 GO:0055114	cellular aromatic compound metabolic process; oxidation-reduction process	GO:0008198 GO:0008270 GO:0016491 GO:0016701	ferrous iron binding; oxidoreductase activity; oxidoreductase activity, acting on single donors with incorporation of molecular oxygen; zinc ion binding	GO:0005737	cytoplasm
Glyma.09G157200	qESP-9-1	GO:0006260 GO:0006351 GO:0009165	DNA replication; nucleotide biosynthetic process; transcription, DNA-dependent	GO:0003677 GO:0003887	DNA-directed DNA polymerase activity; DNA binding	GO:0005634 GO:0005829	cytosol; nucleus
Glyma.09G157300	qESP-9-1	GO:0006486 GO:0007059 GO:0007062 GO:0007129 GO:0007131 GO:0008150 GO:0009887 GO:0009888 GO:0010332 GO:0010413 GO:0010638 GO:0016926 GO:0032204 GO:0032504 GO:0033044 GO:0042138 GO:0043247 GO:0045132 GO:0045492	biological process; chromosome segregation; glucuronoxylan metabolic process; meiotic DNA double-strand break formation; meiotic chromosome segregation; multicellular organism reproduction; organ morphogenesis; positive regulation of organelle organization; protein desumoylation; protein glycosylation; reciprocal meiotic recombination; regulation of chromosome organization; regulation of telomere…	GO:0003674	molecular function	GO:0005634	nucleus
Glyma.09G157400	qESP-9-1	GO:0008150	biological process	GO:0003674	molecular function	GO:0005739	mitochondrion
Glyma.09G157500	qESP-9-1	NA	NA	NA	NA	NA	NA
Glyma.09G157600	qESP-9-1	GO:0008152 GO:0009860	metabolic process; pollen tube growth	GO:0004091 GO:0016787	carboxylesterase activity; hydrolase activity	GO:0005634	nucleus
Glyma.09G157700	qESP-9-1	GO:0008152 GO:0009860	metabolic process; pollen tube growth	GO:0004091 GO:0016787	carboxylesterase activity; hydrolase activity	GO:0005634	nucleus
Glyma.09G157800	qESP-9-1	GO:0008152 GO:0009860	metabolic process; pollen tube growth	GO:0004091 GO:0016787	carboxylesterase activity; hydrolase activity	GO:0005634	nucleus
Glyma.09G157900	qESP-9-1	GO:0006821 GO:0055085	chloride transport; transmembrane transport	GO:0005216 GO:0005247 GO:0005253	anion channel activity; ion channel activity; voltage-gated chloride channel activity	GO:0005622 GO:0005774 GO:0009705 GO:0016020	intracellular; membrane; plant-type vacuole membrane; vacuolar membrane
Glyma.09G158000	qESP-9-1	GO:0006413 GO:0009793 GO:0042256 GO:0071215	cellular response to abscisic acid stimulus; embryo development ending in seed dormancy; mature ribosome assembly; translational initiation	GO:0003743 GO:0043022	ribosome binding; translation initiation factor activity	GO:0005634 GO:0005730 GO:0005829	cytosol; nucleolus; nucleus
Glyma.09G158100	qESP-9-1	GO:0006413 GO:0009793 GO:0042256 GO:0071215	cellular response to abscisic acid stimulus; embryo development ending in seed dormancy; mature ribosome assembly; translational initiation	GO:0003743 GO:0043022	ribosome binding; translation initiation factor activity	GO:0005634 GO:0005730 GO:0005829	cytosol; nucleolus; nucleus
Glyma.09G158200	qESP-9-1	GO:0006364 GO:0006457 GO:0044267	cellular protein metabolic process; protein folding; rRNA processing	GO:0005524 GO:0051082	ATP binding; unfolded protein binding	GO:0005737 GO:0005829	cytoplasm; cytosol
Glyma.09G158300	qESP-9-1	GO:0000394 GO:0006352 GO:0009086 GO:0009616 GO:0010050 GO:0016570 GO:0048573	DNA-dependent transcription, initiation; RNA splicing, via endonucleolytic cleavage and ligation; histone modification; methionine biosynthetic process; photoperiodism, flowering; vegetative phase change; virus induced gene silencing	GO:0003677	DNA binding	GO:0005634	nucleus
Glyma.09G158400	qESP-9-1	GO:0006355 GO:0009414	regulation of transcription, DNA-dependent; response to water deprivation	GO:0003677 GO:0003700 GO:0005515 GO:0043565	DNA binding; protein binding; sequence-specific DNA binding; sequence-specific DNA binding transcription factor activity	GO:0005622 GO:0005634 GO:0016602	CCAAT-binding factor complex; intracellular; nucleus
Glyma.09G158500	qESP-9-1	NA	NA	NA	NA	NA	NA
Glyma.09G158600	qESP-9-1	NA	NA	NA	NA	NA	NA
Glyma.09G158700	qESP-9-1	NA	NA	NA	NA	NA	NA
Glyma.09G158800	qESP-9-1	NA	NA	NA	NA	NA	NA
Glyma.09G158900	qESP-9-1	NA	NA	NA	NA	NA	NA
Glyma.09G159000	qESP-9-1	GO:0008150	biological process	GO:0003674	molecular function	GO:0005739	mitochondrion
Glyma.09G159100	qESP-9-1	GO:0000041 GO:0006826 GO:0008150 GO:0010106 GO:0010167 GO:0015706	biological process; cellular response to iron ion starvation; iron ion transport; nitrate transport; response to nitrate; transition metal ion transport	GO:0003674	molecular function	GO:0005576	extracellular region
Glyma.09G159200	qESP-9-1	GO:0008150	biological process	GO:0003674	molecular function	GO:0005739	mitochondrion
Glyma.09G159300	qESP-9-1	GO:0008150	biological process	GO:0003674	molecular function	GO:0005739	mitochondrion
Glyma.09G159400	qESP-9-1	GO:0008152 GO:0055114	metabolic process; oxidation-reduction process	GO:0000166 GO:0016491	nucleotide binding; oxidoreductase activity	GO:0005829	cytosol
Glyma.09G159500	qESP-9-1	GO:0006338 GO:0016568 GO:0040029	chromatin modification; chromatin remodeling; regulation of gene expression, epigenetic	GO:0003682 GO:0005515	chromatin binding; protein binding	GO:0000228 GO:0005634	nuclear chromosome; nucleus
Glyma.09G159600	qESP-9-1	GO:0006793 GO:0006812 GO:0006814 GO:0006816 GO:0006874 GO:0006882 GO:0009624 GO:0010351 GO:0030026 GO:0051592 GO:0055062 GO:0055085	calcium ion transport; cation transport; cellular calcium ion homeostasis; cellular manganese ion homeostasis; cellular zinc ion homeostasis; lithium ion transport; phosphate ion homeostasis; phosphorus metabolic process; response to calcium ion; response to nematode; sodium ion transport; transmembrane transport	GO:0005515 GO:0008324 GO:0015368 GO:0015369 GO:0015491	calcium:cation antiporter activity; calcium:hydrogen antiporter activity; cation:cation antiporter activity; cation transmembrane transporter activity; protein binding	GO:0005773 GO:0005774 GO:0009705 GO:0016021	integral to membrane; plant-type vacuole membrane; vacuolar membrane; vacuole
Glyma.09G159700	qESP-9-1	NA	NA	NA	NA	GO:0005886	plasma membrane
Glyma.09G159800	qESP-9-1	NA	NA	NA	NA	GO:0005886	plasma membrane
Glyma.09G159900	qESP-9-1	NA	NA	NA	NA	GO:0005886	plasma membrane
Glyma.09G160000	qESP-9-1	GO:0009611 GO:0009651 GO:0009737 GO:0015908 GO:0080051	cutin transport; fatty acid transport; response to abscisic acid stimulus; response to salt stress; response to wounding	GO:0000166 GO:0005524 GO:0015245 GO:0016887 GO:0017111 GO:0042626	ATP binding; ATPase activity; ATPase activity, coupled to transmembrane movement of substances; fatty acid transporter activity; nucleoside-triphosphatase activity; nucleotide binding	GO:0005886 GO:0009897 GO:0016020	external side of plasma membrane; membrane; plasma membrane
Glyma.09G160100	qESP-9-1	GO:0008150	biological process	GO:0003674	molecular function	GO:0005634	nucleus
Glyma.09G160200	qESP-9-1	GO:0007165	signal transduction	GO:0005543 GO:0035091	phosphatidylinositol binding; phospholipid binding	NA	NA
Glyma.09G160300	qESP-9-1	GO:0008150	biological process	GO:0003674	molecular function	GO:0005739	mitochondrion
Glyma.09G160400	qESP-9-1	GO:0000023 GO:0005975 GO:0007020 GO:0009311 GO:0009911 GO:0009965 GO:0016139 GO:0019252 GO:0043085 GO:0046477	carbohydrate metabolic process; glycoside catabolic process; glycosylceramide catabolic process; leaf morphogenesis; maltose metabolic process; microtubule nucleation; oligosaccharide metabolic process; positive regulation of catalytic activity; positive regulation of flower development; starch biosynthetic process	GO:0003824 GO:0004553 GO:0004557	alpha-galactosidase activity; catalytic activity; hydrolase activity, hydrolyzing O-glycosyl compounds	GO:0005576 GO:0005737 GO:0009505	cytoplasm; extracellular region; plant-type cell wall
Glyma.09G160500	qESP-9-1	GO:0006810 GO:0006833 GO:0006914 GO:0055085	autophagy; transmembrane transport; transport; water transport	GO:0005215 GO:0015250	transporter activity; water channel activity	GO:0000326 GO:0005737 GO:0009705 GO:0016020 GO:0016021 GO:0042807	central vacuole; cytoplasm; integral to membrane; membrane; plant-type vacuole membrane; protein storage vacuole
Glyma.09G160600	qESP-9-1	GO:0006468 GO:0007169 GO:0010075	protein phosphorylation; regulation of meristem growth; transmembrane receptor protein tyrosine kinase signaling pathway	GO:0004672 GO:0004674 GO:0004713 GO:0005524 GO:0016301 GO:0016772	ATP binding; kinase activity; protein kinase activity; protein serine/threonine kinase activity; protein tyrosine kinase activity; transferase activity, transferring phosphorus-containing groups	GO:0005774 GO:0005886 GO:0009506	plasma membrane; plasmodesma; vacuolar membrane
Glyma.09G160700	qESP-9-1	GO:0008150	biological process	GO:0003674	molecular function	GO:0005737	cytoplasm
Glyma.09G160800	qESP-9-1	NA	NA	NA	NA	NA	NA
Glyma.09G160900	qESP-9-1	GO:0055114	oxidation-reduction process	GO:0004497 GO:0005506 GO:0009055 GO:0016705 GO:0019825 GO:0020037	electron carrier activity; heme binding; iron ion binding; monooxygenase activity; oxidoreductase activity, acting on paired donors, with incorporation or reduction of molecular oxygen; oxygen binding	NA	NA
Glyma.09G161000	qESP-9-1	GO:0008150	biological process	GO:0003674	molecular function	GO:0005634	nucleus
Glyma.09G161100	qESP-9-1	GO:0002679 GO:0006468 GO:0006612 GO:0006944 GO:0009723 GO:0009738 GO:0010200 GO:0010363 GO:0035556 GO:0043069 GO:0052542	abscisic acid mediated signaling pathway; cellular membrane fusion; defense response by callose deposition; intracellular signal transduction; negative regulation of programmed cell death; protein phosphorylation; protein targeting to membrane; regulation of plant-type hypersensitive response; respiratory burst involved in defense response; response to chitin; response to ethylene stimulus	GO:0004672 GO:0004674 GO:0005524 GO:0016301 GO:0016772	ATP binding; kinase activity; protein kinase activity; protein serine/threonine kinase activity; transferase activity, transferring phosphorus-containing groups	GO:0005886 GO:0016020	membrane; plasma membrane
Glyma.09G161200	qESP-9-1	GO:0019303	D-ribose catabolic process	GO:0016301	kinase activity	GO:0005737	cytoplasm
Glyma.09G161300	qESP-9-1	GO:0006511 GO:0006635 GO:0030163 GO:0043161 GO:0043248 GO:0046685 GO:0051603 GO:0051788 GO:0080129	fatty acid beta-oxidation; proteasomal ubiquitin-dependent protein catabolic process; proteasome assembly; proteasome core complex assembly; protein catabolic process; proteolysis involved in cellular protein catabolic process; response to arsenic-containing substance; response to misfolded protein; ubiquitin-dependent protein catabolic process	GO:0004175 GO:0004298 GO:0008233	endopeptidase activity; peptidase activity; threonine-type endopeptidase activity	GO:0000502 GO:0005737 GO:0005829 GO:0005839 GO:0005886 GO:0019773	cytoplasm; cytosol; plasma membrane; proteasome complex; proteasome core complex; proteasome core complex, alpha-subunit complex
Glyma.09G161400	qESP-9-1	GO:0006952 GO:0007165	defense response; signal transduction	GO:0043531	ADP binding	GO:0005622 GO:0005737	cytoplasm; intracellular
Glyma.09G161500	qESP-9-1	NA	NA	NA	NA	NA	NA
Glyma.09G161600	qESP-9-1	GO:0009611 GO:0009805 GO:0055114	coumarin biosynthetic process; oxidation-reduction process; response to wounding	GO:0000166 GO:0008270 GO:0016491 GO:0016747	nucleotide binding; oxidoreductase activity; transferase activity, transferring acyl groups other than amino-acyl groups; zinc ion binding	GO:0005737	cytoplasm
Glyma.09G161700	qESP-9-1	GO:0008150	biological process	GO:0003674	molecular function	GO:0005575	cellular component
Glyma.09G161800	qESP-9-1	NA	NA	NA	NA	NA	NA
Glyma.09G161900	qESP-9-1	GO:0006499	N-terminal protein myristoylation	GO:0003674	molecular function	GO:0005634	nucleus
Glyma.09G162000	qESP-9-1	NA	NA	NA	NA	NA	NA
Glyma.09G162100	qESP-9-1	GO:0006084 GO:0006260 GO:0006261 GO:0006270 GO:0006275 GO:0006342 GO:0009658 GO:0009909 GO:0010389 GO:0016458 GO:0016572 GO:0034968 GO:0048229 GO:0051276 GO:0051567 GO:0051726	DNA-dependent DNA replication; DNA replication; DNA replication initiation; acetyl-CoA metabolic process; chloroplast organization; chromatin silencing; chromosome organization; gametophyte development; gene silencing; histone H3-K9 methylation; histone lysine methylation; histone phosphorylation; regulation of DNA replication; regulation of G2/M transition of mitotic cell cycle; regulation of ce…	GO:0004693 GO:0005515 GO:0019901 GO:0070182	DNA polymerase binding; cyclin-dependent protein serine/threonine kinase activity; protein binding; protein kinase binding	GO:0005634 GO:0009507	chloroplast; nucleus
Glyma.09G162200	qESP-9-1	GO:0009555 GO:0009567	double fertilization forming a zygote and endosperm; pollen development	GO:0003674	molecular function	GO:0005739	mitochondrion
Glyma.09G162300	qESP-9-1	NA	NA	NA	NA	NA	NA
Glyma.09G162400	qESP-9-1	GO:0006970 GO:0008152 GO:0009414 GO:0009611 GO:0009651 GO:0009723 GO:0009737 GO:0009738 GO:0042538 GO:0046345	abscisic acid catabolic process; abscisic acid mediated signaling pathway; hyperosmotic salinity response; metabolic process; response to abscisic acid stimulus; response to ethylene stimulus; response to osmotic stress; response to salt stress; response to water deprivation; response to wounding	GO:0008194 GO:0010294 GO:0016757 GO:0016758	UDP-glycosyltransferase activity; abscisic acid glucosyltransferase activity; transferase activity, transferring glycosyl groups; transferase activity, transferring hexosyl groups	GO:0016020	membrane
Glyma.09G162500	qESP-9-1	GO:0006457 GO:0009408 GO:0009644 GO:0010167 GO:0015706 GO:0034976 GO:0042542	nitrate transport; protein folding; response to endoplasmic reticulum stress; response to heat; response to high light intensity; response to hydrogen peroxide; response to nitrate	GO:0004866	endopeptidase inhibitor activity	GO:0005576 GO:0005618 GO:0048046	apoplast; cell wall; extracellular region
Glyma.09G162600	qESP-9-1	GO:0006457 GO:0009408 GO:0009644 GO:0010167 GO:0015706 GO:0034976 GO:0042542	nitrate transport; protein folding; response to endoplasmic reticulum stress; response to heat; response to high light intensity; response to hydrogen peroxide; response to nitrate	GO:0004866	endopeptidase inhibitor activity	GO:0005576 GO:0005618 GO:0048046	apoplast; cell wall; extracellular region
Glyma.09G162700	qESP-9-1	GO:0006457 GO:0009408 GO:0009644 GO:0010167 GO:0015706 GO:0034976 GO:0042542	nitrate transport; protein folding; response to endoplasmic reticulum stress; response to heat; response to high light intensity; response to hydrogen peroxide; response to nitrate	GO:0004866	endopeptidase inhibitor activity	GO:0005576 GO:0005618 GO:0048046	apoplast; cell wall; extracellular region
Glyma.09G162800	qESP-9-1	GO:0006457 GO:0009408 GO:0009644 GO:0010167 GO:0015706 GO:0034976 GO:0042542	nitrate transport; protein folding; response to endoplasmic reticulum stress; response to heat; response to high light intensity; response to hydrogen peroxide; response to nitrate	GO:0004866	endopeptidase inhibitor activity	GO:0005576 GO:0005618 GO:0048046	apoplast; cell wall; extracellular region
Glyma.09G162900	qESP-9-1	NA	NA	NA	NA	NA	NA
Glyma.09G163000	qESP-9-1	GO:0006457 GO:0009408 GO:0009644 GO:0010167 GO:0015706 GO:0034976 GO:0042542	nitrate transport; protein folding; response to endoplasmic reticulum stress; response to heat; response to high light intensity; response to hydrogen peroxide; response to nitrate	GO:0004866	endopeptidase inhibitor activity	GO:0005576 GO:0005618 GO:0048046	apoplast; cell wall; extracellular region
Glyma.09G163100	qESP-9-1	GO:0006457 GO:0009408 GO:0009644 GO:0010167 GO:0015706 GO:0034976 GO:0042542	nitrate transport; protein folding; response to endoplasmic reticulum stress; response to heat; response to high light intensity; response to hydrogen peroxide; response to nitrate	GO:0004866	endopeptidase inhibitor activity	GO:0005576 GO:0005618 GO:0048046	apoplast; cell wall; extracellular region
Glyma.09G163200	qESP-9-1	GO:0006457 GO:0009408 GO:0009644 GO:0010167 GO:0015706 GO:0034976 GO:0042542	nitrate transport; protein folding; response to endoplasmic reticulum stress; response to heat; response to high light intensity; response to hydrogen peroxide; response to nitrate	GO:0004866	endopeptidase inhibitor activity	GO:0005576 GO:0005618 GO:0048046	apoplast; cell wall; extracellular region
Glyma.09G163300	qESP-9-1	GO:0006457 GO:0009408 GO:0009644 GO:0010167 GO:0015706 GO:0034976 GO:0042542	nitrate transport; protein folding; response to endoplasmic reticulum stress; response to heat; response to high light intensity; response to hydrogen peroxide; response to nitrate	GO:0004866	endopeptidase inhibitor activity	GO:0005576 GO:0005618 GO:0048046	apoplast; cell wall; extracellular region
Glyma.09G163400	qESP-9-1	GO:0006457 GO:0009408 GO:0009644 GO:0010167 GO:0015706 GO:0034976 GO:0042542	nitrate transport; protein folding; response to endoplasmic reticulum stress; response to heat; response to high light intensity; response to hydrogen peroxide; response to nitrate	GO:0004866	endopeptidase inhibitor activity	GO:0005576 GO:0005618 GO:0048046	apoplast; cell wall; extracellular region
Glyma.09G163500	qESP-9-1	NA	NA	NA	NA	NA	NA
Glyma.09G163600	qESP-9-1	GO:0006457 GO:0009408 GO:0009644 GO:0010167 GO:0015706 GO:0034976 GO:0042542	nitrate transport; protein folding; response to endoplasmic reticulum stress; response to heat; response to high light intensity; response to hydrogen peroxide; response to nitrate	GO:0004866	endopeptidase inhibitor activity	GO:0005576 GO:0005618 GO:0048046	apoplast; cell wall; extracellular region
Glyma.09G163700	qESP-9-1	GO:0006457 GO:0009408 GO:0009644 GO:0010167 GO:0015706 GO:0034976 GO:0042542	nitrate transport; protein folding; response to endoplasmic reticulum stress; response to heat; response to high light intensity; response to hydrogen peroxide; response to nitrate	GO:0004866	endopeptidase inhibitor activity	GO:0005576 GO:0005618 GO:0048046	apoplast; cell wall; extracellular region
Glyma.09G163800	qESP-9-1	NA	NA	GO:0004866	endopeptidase inhibitor activity	GO:0005576	extracellular region
Glyma.09G163900	qESP-9-1	GO:0006457 GO:0009408 GO:0009644 GO:0010167 GO:0015706 GO:0034976 GO:0042542	nitrate transport; protein folding; response to endoplasmic reticulum stress; response to heat; response to high light intensity; response to hydrogen peroxide; response to nitrate	GO:0004866	endopeptidase inhibitor activity	GO:0005576 GO:0005618 GO:0048046	apoplast; cell wall; extracellular region
Glyma.09G164000	qESP-9-1	NA	NA	NA	NA	NA	NA
Glyma.09G164100	qESP-9-1	GO:0008150	biological process	GO:0003674	molecular function	GO:0009507	chloroplast
Glyma.09G164200	qESP-9-1	GO:0000394 GO:0006351 GO:0006366	RNA splicing, via endonucleolytic cleavage and ligation; transcription, DNA-dependent; transcription from RNA polymerase II promoter	GO:0003677 GO:0003899	DNA-directed RNA polymerase activity; DNA binding	GO:0000418 GO:0000419 GO:0005634 GO:0005665	DNA-directed RNA polymerase II, core complex; DNA-directed RNA polymerase IV complex; DNA-directed RNA polymerase V complex; nucleus
Glyma.09G164300	qESP-9-1	GO:0008150	biological process	GO:0003674	molecular function	GO:0005634	nucleus
Glyma.09G164400	qESP-9-1	NA	NA	NA	NA	NA	NA
Glyma.09G164500	qESP-9-1	GO:0006857 GO:0006865 GO:0055085	amino acid transport; oligopeptide transport; transmembrane transport	GO:0015198	oligopeptide transporter activity	GO:0005886	plasma membrane
Glyma.09G164600	qESP-9-1	GO:0000278 GO:0006355 GO:0006396 GO:0009410 GO:0042023 GO:0043687 GO:0045893 GO:0048522 GO:0048766	DNA endoreduplication; RNA processing; mitotic cell cycle; positive regulation of cellular process; positive regulation of transcription, DNA-dependent; post-translational protein modification; regulation of transcription, DNA-dependent; response to xenobiotic stimulus; root hair initiation	GO:0003677 GO:0005515	DNA binding; protein binding	GO:0005634 GO:0005730	nucleolus; nucleus
Glyma.09G164700	qESP-9-1	GO:0010020 GO:0043572	chloroplast fission; plastid fission	GO:0005515 GO:0043621	protein binding; protein self-association	GO:0009507 GO:0009528	chloroplast; plastid inner membrane
Glyma.09G164800	qESP-9-1	GO:0006612 GO:0006952 GO:0007165 GO:0009963 GO:0010363	defense response; positive regulation of flavonoid biosynthetic process; protein targeting to membrane; regulation of plant-type hypersensitive response; signal transduction	GO:0043531	ADP binding	GO:0005634	nucleus
Glyma.09G164900	qESP-9-1	GO:0006626 GO:0008152 GO:0009220	metabolic process; protein targeting to mitochondrion; pyrimidine ribonucleotide biosynthetic process	GO:0000166 GO:0003824 GO:0003878 GO:0004775 GO:0004776 GO:0005507	ATP citrate synthase activity; catalytic activity; copper ion binding; nucleotide binding; succinate-CoA ligase (ADP-forming) activity; succinate-CoA ligase (GDP-forming) activity	GO:0005739	mitochondrion
Glyma.09G165000	qESP-9-1	GO:0006486	protein glycosylation	GO:0004576	oligosaccharyl transferase activity	GO:0005783 GO:0005886 GO:0016020	endoplasmic reticulum; membrane; plasma membrane
Glyma.09G165100	qESP-9-1	GO:0016998	cell wall macromolecule catabolic process	GO:0003674	molecular function	GO:0005634	nucleus
Glyma.09G165200	qESP-9-1	GO:0010200	response to chitin	GO:0008270	zinc ion binding	NA	NA
Glyma.09G165300	qESP-9-1	GO:0009408	response to heat	GO:0003674	molecular function	GO:0005737	cytoplasm
Glyma.09G165400	qESP-9-1	GO:0008150 GO:0019243	biological process; methylglyoxal catabolic process to D-lactate	NA	NA	GO:0009507	chloroplast
Glyma.09G165500	qESP-9-1	NA	NA	NA	NA	NA	NA
Glyma.09G165600	qESP-9-1	GO:0006457 GO:0008150 GO:0009408 GO:0009644 GO:0034976 GO:0042542	biological process; protein folding; response to endoplasmic reticulum stress; response to heat; response to high light intensity; response to hydrogen peroxide	GO:0003674	molecular function	GO:0005737 GO:0016020	cytoplasm; membrane
Glyma.09G165700	qESP-9-1	GO:0032312	regulation of ARF GTPase activity	GO:0003677 GO:0008060 GO:0008270	ARF GTPase activator activity; DNA binding; zinc ion binding	GO:0005634 GO:0005737	cytoplasm; nucleus
Glyma.09G165800	qESP-9-1	GO:0048765 GO:0048767	root hair cell differentiation; root hair elongation	GO:0005507 GO:0009055	copper ion binding; electron carrier activity	GO:0005886 GO:0031225	anchored to membrane; plasma membrane
Glyma.09G165900	qESP-9-1	GO:0008150 GO:0015824	biological process; proline transport	GO:0003674	molecular function	GO:0009507	chloroplast
Glyma.09G166000	qESP-9-1	GO:0006415	translational termination	GO:0003747 GO:0016149	translation release factor activity; translation release factor activity, codon specific	GO:0005737	cytoplasm
Glyma.09G166100	qESP-9-1	GO:0007275 GO:0008152 GO:0010073	meristem maintenance; metabolic process; multicellular organismal development	GO:0000166 GO:0016491	nucleotide binding; oxidoreductase activity	GO:0005634 GO:0005783	endoplasmic reticulum; nucleus
Glyma.09G166200	qESP-9-1	NA	NA	GO:0005507 GO:0009055	copper ion binding; electron carrier activity	GO:0005886	plasma membrane
Glyma.09G166300	qESP-9-1	GO:0008150	biological process	GO:0003674	molecular function	GO:0005739	mitochondrion
Glyma.09G166400	qESP-9-1	GO:0010150 GO:0015706 GO:0016036 GO:0019375 GO:0045892 GO:0055085	cellular response to phosphate starvation; galactolipid biosynthetic process; leaf senescence; negative regulation of transcription, DNA-dependent; nitrate transport; transmembrane transport	GO:0005215 GO:0015144 GO:0015226 GO:0022857	carbohydrate transmembrane transporter activity; carnitine transmembrane transporter activity; transmembrane transporter activity; transporter activity	GO:0005886 GO:0016020 GO:0016021	integral to membrane; membrane; plasma membrane
Glyma.09G166500	qESP-9-1	GO:0008150	biological process	GO:0003674	molecular function	GO:0005634 GO:0005783	endoplasmic reticulum; nucleus
Glyma.09G166600	qESP-9-1	GO:0008150	biological process	GO:0003674	molecular function	GO:0009507 GO:0009543	chloroplast; chloroplast thylakoid lumen
Glyma.09G166700	qESP-9-1	NA	NA	NA	NA	NA	NA
Glyma.09G166800	qESP-9-1	NA	NA	NA	NA	NA	NA
Glyma.09G166900	qESP-9-1	GO:0008150	biological process	GO:0003674	molecular function	GO:0009507 GO:0009543	chloroplast; chloroplast thylakoid lumen
Glyma.09G167000	qESP-9-1	GO:0001666 GO:0005985 GO:0005986 GO:0009058 GO:0019375 GO:0080165	biosynthetic process; callose deposition in phloem sieve plate; galactolipid biosynthetic process; response to hypoxia; sucrose biosynthetic process; sucrose metabolic process	GO:0008194 GO:0016157	UDP-glycosyltransferase activity; sucrose synthase activity	GO:0005618 GO:0009507	cell wall; chloroplast
Glyma.09G167100	qESP-9-1	GO:0006306 GO:0006342 GO:0006346 GO:0007062 GO:0007155 GO:0007267 GO:0009616 GO:0009733 GO:0009793 GO:0009850 GO:0009855 GO:0009880 GO:0009887 GO:0009926 GO:0009955 GO:0009965 GO:0010014 GO:0010050 GO:0010051 GO:0010072 GO:0010073 GO:0010090 GO:0010218 GO:0010228 GO:0010267 GO:0010305 GO:0010431 GO:0010589 GO:0016246 GO:0016441 GO:0016569 GO:0031047 GO:0035195 GO:0035196 GO:0045010 GO:0045087 GO:…	DNA methylation; RNA interference; actin nucleation; adaxial/abaxial pattern specification; adventitious root development; auxin metabolic process; auxin polar transport; cell-cell signaling; cell adhesion; cell division; cell wall organization; chromatin silencing; covalent chromatin modification; determination of bilateral symmetry; embryo development ending in seed dormancy; embryonic pattern …	GO:0004521 GO:0005515 GO:0035197 GO:0035198	endoribonuclease activity; miRNA binding; protein binding; siRNA binding	GO:0005634 GO:0005737 GO:0005829 GO:0019898	cytoplasm; cytosol; extrinsic to membrane; nucleus
Glyma.09G167200	qESP-9-1	NA	NA	NA	NA	NA	NA
Glyma.09G167300	qESP-9-1	GO:0009407 GO:0010583	response to cyclopentenone; toxin catabolic process	GO:0004364	glutathione transferase activity	GO:0005737	cytoplasm
Glyma.09G167400	qESP-9-1	GO:0006355 GO:0007275	multicellular organismal development; regulation of transcription, DNA-dependent	GO:0003677 GO:0003700	DNA binding; sequence-specific DNA binding transcription factor activity	GO:0005634	nucleus
Glyma.09G167500	qESP-9-1	GO:0008150	biological process	NA	NA	NA	NA
Glyma.09G167600	qESP-9-1	NA	NA	NA	NA	NA	NA
Glyma.09G167700	qESP-9-1	GO:0015937 GO:0042538	coenzyme A biosynthetic process; hyperosmotic salinity response	GO:0003824 GO:0004633 GO:0010181	FMN binding; catalytic activity; phosphopantothenoylcysteine decarboxylase activity	GO:0005737 GO:0005829	cytoplasm; cytosol
Glyma.09G167800	qESP-9-1	GO:0008150	biological process	GO:0000166 GO:0003676 GO:0003723	RNA binding; nucleic acid binding; nucleotide binding	GO:0009507	chloroplast
Glyma.09G167900	qESP-9-1	GO:0006355 GO:0007623 GO:0009651 GO:0009723 GO:0046686	circadian rhythm; regulation of transcription, DNA-dependent; response to cadmium ion; response to ethylene stimulus; response to salt stress	GO:0003677 GO:0003700	DNA binding; sequence-specific DNA binding transcription factor activity	GO:0005634	nucleus
Glyma.09G168000	qESP-9-1	GO:0006355 GO:0010091	regulation of transcription, DNA-dependent; trichome branching	GO:0003677 GO:0003700 GO:0005515 GO:0043565	DNA binding; protein binding; sequence-specific DNA binding; sequence-specific DNA binding transcription factor activity	GO:0005634	nucleus
Glyma.09G168100	qESP-9-1	GO:0008150	biological process	GO:0003674	molecular function	GO:0005634	nucleus
Glyma.09G168200	qESP-9-1	NA	NA	NA	NA	NA	NA
Glyma.09G168300	qESP-9-1	GO:0000272 GO:0005975 GO:0005983 GO:0009414	carbohydrate metabolic process; polysaccharide catabolic process; response to water deprivation; starch catabolic process	GO:0003824 GO:0016161 GO:0043169	beta-amylase activity; catalytic activity; cation binding	GO:0005634 GO:0005829 GO:0009507	chloroplast; cytosol; nucleus
Glyma.09G168400	qESP-9-1	GO:0000165 GO:0006612 GO:0006811 GO:0009595 GO:0009624 GO:0009697 GO:0009862 GO:0009867 GO:0010200 GO:0010310 GO:0010363 GO:0031348 GO:0042742 GO:0043900 GO:0050832 GO:0055085	MAPK cascade; defense response to bacterium; defense response to fungus; detection of biotic stimulus; ion transport; jasmonic acid mediated signaling pathway; negative regulation of defense response; protein targeting to membrane; regulation of hydrogen peroxide metabolic process; regulation of multi-organism process; regulation of plant-type hypersensitive response; response to chitin; response…	GO:0005216 GO:0005516 GO:0030551	calmodulin binding; cyclic nucleotide binding; ion channel activity	GO:0005886	plasma membrane
Glyma.09G168500	qESP-9-1	GO:0000165 GO:0006612 GO:0006811 GO:0009595 GO:0009624 GO:0009697 GO:0009862 GO:0009867 GO:0010200 GO:0010310 GO:0010363 GO:0031348 GO:0042742 GO:0043900 GO:0050832 GO:0055085	MAPK cascade; defense response to bacterium; defense response to fungus; detection of biotic stimulus; ion transport; jasmonic acid mediated signaling pathway; negative regulation of defense response; protein targeting to membrane; regulation of hydrogen peroxide metabolic process; regulation of multi-organism process; regulation of plant-type hypersensitive response; response to chitin; response…	GO:0005216 GO:0005516 GO:0030551	calmodulin binding; cyclic nucleotide binding; ion channel activity	GO:0005886	plasma membrane
Glyma.09G168600	qESP-9-1	GO:0000165 GO:0006612 GO:0006811 GO:0009595 GO:0009624 GO:0009697 GO:0009862 GO:0009867 GO:0010200 GO:0010310 GO:0010363 GO:0031348 GO:0042742 GO:0043900 GO:0050832 GO:0055085	MAPK cascade; defense response to bacterium; defense response to fungus; detection of biotic stimulus; ion transport; jasmonic acid mediated signaling pathway; negative regulation of defense response; protein targeting to membrane; regulation of hydrogen peroxide metabolic process; regulation of multi-organism process; regulation of plant-type hypersensitive response; response to chitin; response…	GO:0005216 GO:0005516 GO:0030551	calmodulin binding; cyclic nucleotide binding; ion channel activity	GO:0005886	plasma membrane
Glyma.09G168700	qESP-9-1	GO:0000165 GO:0006612 GO:0006811 GO:0009595 GO:0009624 GO:0009697 GO:0009862 GO:0009867 GO:0010200 GO:0010310 GO:0010363 GO:0031348 GO:0042742 GO:0043900 GO:0050832 GO:0055085	MAPK cascade; defense response to bacterium; defense response to fungus; detection of biotic stimulus; ion transport; jasmonic acid mediated signaling pathway; negative regulation of defense response; protein targeting to membrane; regulation of hydrogen peroxide metabolic process; regulation of multi-organism process; regulation of plant-type hypersensitive response; response to chitin; response…	GO:0005216 GO:0005516 GO:0030551	calmodulin binding; cyclic nucleotide binding; ion channel activity	GO:0005886	plasma membrane
Glyma.09G168800	qESP-9-1	GO:0008150	biological process	NA	NA	GO:0005575	cellular component
Glyma.09G168900	qESP-9-1	GO:0006536 GO:0006540 GO:0019752	carboxylic acid metabolic process; glutamate decarboxylation to succinate; glutamate metabolic process	GO:0003824 GO:0004351 GO:0005516 GO:0016831 GO:0030170	calmodulin binding; carboxy-lyase activity; catalytic activity; glutamate decarboxylase activity; pyridoxal phosphate binding	GO:0009506	plasmodesma
Glyma.09G169000	qESP-9-1	GO:0008150	biological process	GO:0003674	molecular function	GO:0005739	mitochondrion
Glyma.09G169100	qESP-9-1	GO:0006260 GO:0006261	DNA-dependent DNA replication; DNA replication	GO:0003677 GO:0003887	DNA-directed DNA polymerase activity; DNA binding	GO:0005634 GO:0008622	epsilon DNA polymerase complex; nucleus
Glyma.09G169200	qESP-9-1	GO:0006481 GO:0009788 GO:0009908 GO:0048367	C-terminal protein methylation; flower development; negative regulation of abscisic acid mediated signaling pathway; shoot system development	GO:0004671	protein C-terminal S-isoprenylcysteine carboxyl O-methyltransferase activity	GO:0005783 GO:0016021	endoplasmic reticulum; integral to membrane
Glyma.09G169300	qESP-9-1	GO:0006355 GO:0009737 GO:2000652	regulation of secondary cell wall biogenesis; regulation of transcription, DNA-dependent; response to abscisic acid stimulus	GO:0003677 GO:0003700	DNA binding; sequence-specific DNA binding transcription factor activity	GO:0005634	nucleus
Glyma.09G169400	qESP-9-1	GO:0006810	transport	NA	NA	GO:0005768 GO:0005794 GO:0005802 GO:0016020 GO:0016021	Golgi apparatus; endosome; integral to membrane; membrane; trans-Golgi network
Glyma.09G169500	qESP-9-1	GO:0006468	protein phosphorylation	GO:0004672 GO:0004674 GO:0004713 GO:0005524 GO:0016301 GO:0016772	ATP binding; kinase activity; protein kinase activity; protein serine/threonine kinase activity; protein tyrosine kinase activity; transferase activity, transferring phosphorus-containing groups	GO:0005634 GO:0005737 GO:0005829 GO:0005886	cytoplasm; cytosol; nucleus; plasma membrane
Glyma.09G169600	qESP-9-1	GO:0000956 GO:0007346 GO:0008150 GO:0010048	biological process; nuclear-transcribed mRNA catabolic process; regulation of mitotic cell cycle; vernalization response	GO:0003674	molecular function	GO:0005634	nucleus
Glyma.09G169700	qESP-9-1	GO:0009651 GO:0055114	oxidation-reduction process; response to salt stress	GO:0016491	oxidoreductase activity	GO:0005829 GO:0009507	chloroplast; cytosol
Glyma.09G169800	qESP-9-1	GO:0009873 GO:0055114	ethylene mediated signaling pathway; oxidation-reduction process	GO:0016491	oxidoreductase activity	GO:0009507	chloroplast
Glyma.09G169900	qESP-9-1	GO:0009651 GO:0055114	oxidation-reduction process; response to salt stress	GO:0016491	oxidoreductase activity	GO:0005829 GO:0009507	chloroplast; cytosol
Glyma.09G170000	qESP-9-1	GO:0009651 GO:0055114	oxidation-reduction process; response to salt stress	GO:0016491	oxidoreductase activity	GO:0005829 GO:0009507	chloroplast; cytosol
Glyma.09G170100	qESP-9-1	GO:0006865 GO:0006888 GO:0008150 GO:0043090	ER to Golgi vesicle-mediated transport; amino acid import; amino acid transport; biological process	GO:0003674	molecular function	GO:0009507 GO:0016020	chloroplast; membrane
Glyma.09G170200	qESP-9-1	GO:0006355 GO:2000904	regulation of starch metabolic process; regulation of transcription, DNA-dependent	GO:0003676 GO:0003700 GO:0008270 GO:0043621 GO:0044212 GO:0046982	nucleic acid binding; protein heterodimerization activity; protein self-association; sequence-specific DNA binding transcription factor activity; transcription regulatory region DNA binding; zinc ion binding	GO:0005622 GO:0005634	intracellular; nucleus
Glyma.09G170300	qESP-9-1	GO:0006355 GO:0009723 GO:0050793	regulation of developmental process; regulation of transcription, DNA-dependent; response to ethylene stimulus	GO:0003677 GO:0003700 GO:0043565	DNA binding; sequence-specific DNA binding; sequence-specific DNA binding transcription factor activity	GO:0005634	nucleus
Glyma.09G170400	qESP-9-1	GO:0006355 GO:0009723 GO:0050793	regulation of developmental process; regulation of transcription, DNA-dependent; response to ethylene stimulus	GO:0003677 GO:0003700 GO:0043565	DNA binding; sequence-specific DNA binding; sequence-specific DNA binding transcription factor activity	GO:0005634	nucleus
Glyma.09G170500	qESP-9-1	GO:0009686 GO:0009737 GO:0009740 GO:0009793 GO:0009845 GO:0010162 GO:0048608	embryo development ending in seed dormancy; gibberellic acid mediated signaling pathway; gibberellin biosynthetic process; reproductive structure development; response to abscisic acid stimulus; seed dormancy process; seed germination	GO:0003677 GO:0003700 GO:0005515	DNA binding; protein binding; sequence-specific DNA binding transcription factor activity	GO:0005634	nucleus
Glyma.09G170600	qESP-9-1	GO:0006071 GO:0009610 GO:0016036 GO:0019375 GO:0042631	cellular response to phosphate starvation; cellular response to water deprivation; galactolipid biosynthetic process; glycerol metabolic process; response to symbiotic fungus	GO:0004371 GO:0005524	ATP binding; glycerone kinase activity	GO:0005737	cytoplasm
Glyma.09G170700	qESP-9-1	GO:0008152	metabolic process	GO:0008080	N-acetyltransferase activity	GO:0005634	nucleus
Glyma.09G170800	qESP-9-1	GO:0006944 GO:0008152 GO:0048193	Golgi vesicle transport; cellular membrane fusion; metabolic process	GO:0008168	methyltransferase activity	NA	NA
Glyma.09G170900	qESP-9-1	GO:0001510 GO:0006412	RNA methylation; translation	GO:0003735 GO:0019843	rRNA binding; structural constituent of ribosome	GO:0005622 GO:0005737 GO:0005840 GO:0015934 GO:0022625 GO:0022626	cytoplasm; cytosolic large ribosomal subunit; cytosolic ribosome; intracellular; large ribosomal subunit; ribosome
Glyma.09G171000	qESP-9-1	GO:0000741 GO:0006406 GO:0006606 GO:0009560 GO:0009561	embryo sac egg cell differentiation; karyogamy; mRNA export from nucleus; megagametogenesis; protein import into nucleus	GO:0003674	molecular function	GO:0005634 GO:0005730 GO:0080008	CUL4-RING ubiquitin ligase complex; nucleolus; nucleus
Glyma.09G171100	qESP-9-1	GO:0006355 GO:0009737 GO:0009793 GO:0009845 GO:0009944 GO:0010162 GO:0048440 GO:0048481	carpel development; embryo development ending in seed dormancy; ovule development; polarity specification of adaxial/abaxial axis; regulation of transcription, DNA-dependent; response to abscisic acid stimulus; seed dormancy process; seed germination	GO:0003677 GO:0003700	DNA binding; sequence-specific DNA binding transcription factor activity	GO:0005634	nucleus
Glyma.09G171200	qESP-9-1	GO:0080156	mitochondrial mRNA modification	GO:0003676 GO:0004386 GO:0005524	ATP binding; helicase activity; nucleic acid binding	GO:0005739	mitochondrion
Glyma.09G171300	qESP-9-1	GO:0006091 GO:0006354 GO:0015979 GO:0017004	DNA-dependent transcription, elongation; cytochrome complex assembly; generation of precursor metabolites and energy; photosynthesis	GO:0045158	electron transporter, transferring electrons within cytochrome b6/f complex of photosystem II activity	GO:0009507 GO:0009512	chloroplast; cytochrome b6f complex
Glyma.09G171400	qESP-9-1	GO:0015979 GO:0019684	photosynthesis; photosynthesis, light reaction	NA	NA	GO:0009507 GO:0009523 GO:0016021	chloroplast; integral to membrane; photosystem II
Glyma.09G171500	qESP-9-1	GO:0006091 GO:0006176 GO:0006354 GO:0009409 GO:0009832 GO:0015979 GO:0015986 GO:0015991 GO:0015992 GO:0016049 GO:0019684 GO:0030243 GO:0042742 GO:0046034	ATP hydrolysis coupled proton transport; ATP metabolic process; ATP synthesis coupled proton transport; DNA-dependent transcription, elongation; cell growth; cellulose metabolic process; dATP biosynthetic process from ADP; defense response to bacterium; generation of precursor metabolites and energy; photosynthesis; photosynthesis, light reaction; plant-type cell wall biogenesis; proton transport…	GO:0005524 GO:0008270 GO:0016820 GO:0046933 GO:0046961	ATP binding; hydrolase activity, acting on acid anhydrides, catalyzing transmembrane movement of substances; proton-transporting ATP synthase activity, rotational mechanism; proton-transporting ATPase activity, rotational mechanism; zinc ion binding	GO:0005739 GO:0009507 GO:0009534 GO:0009535 GO:0009544 GO:0009579 GO:0010287 GO:0010319 GO:0016020 GO:0016469 GO:0031977 GO:0033178 GO:0045261	chloroplast; chloroplast ATP synthase complex; chloroplast thylakoid; chloroplast thylakoid membrane; membrane; mitochondrion; plastoglobule; proton-transporting ATP synthase complex, catalytic core F(1); proton-transporting two-sector ATPase complex; proton-transporting two-sector ATPase complex, catalytic domain; stromule; thylakoid; thylakoid lumen
Glyma.09G171600	qESP-9-1	GO:0009408 GO:0009409 GO:0009414 GO:0009639 GO:0009651 GO:0009827 GO:0009860 GO:0030048	actin filament-based movement; plant-type cell wall modification; pollen tube growth; response to cold; response to heat; response to red or far red light; response to salt stress; response to water deprivation	GO:0005509 GO:0005544	calcium-dependent phospholipid binding; calcium ion binding	NA	NA
Glyma.09G171700	qESP-9-1	GO:0006970 GO:0009651 GO:0009658 GO:0009737	chloroplast organization; response to abscisic acid stimulus; response to osmotic stress; response to salt stress	GO:0003674	molecular function	GO:0005739	mitochondrion
Glyma.09G171800	qESP-9-1	GO:0009409 GO:0009414 GO:0009737 GO:0042538	hyperosmotic salinity response; response to abscisic acid stimulus; response to cold; response to water deprivation	GO:0016787	hydrolase activity	GO:0005737	cytoplasm
Glyma.09G171900	qESP-9-1	GO:0008150	biological process	GO:0003674	molecular function	NA	NA
Glyma.09G172000	qESP-9-1	GO:0006184 GO:0007165 GO:0007186 GO:0007188 GO:0009630 GO:0009652 GO:0009723 GO:0009737 GO:0009744 GO:0009749 GO:0009750 GO:0010555 GO:0048364 GO:2000067	G-protein coupled receptor signaling pathway; GTP catabolic process; adenylate cyclase-modulating G-protein coupled receptor signaling pathway; gravitropism; regulation of root morphogenesis; response to abscisic acid stimulus; response to ethylene stimulus; response to fructose stimulus; response to glucose stimulus; response to mannitol stimulus; response to sucrose stimulus; root development; …	GO:0001664 GO:0003924 GO:0004871 GO:0019001 GO:0031683	G-protein beta/gamma-subunit complex binding; G-protein coupled receptor binding; GTPase activity; guanyl nucleotide binding; signal transducer activity	GO:0005634 GO:0005737 GO:0005834 GO:0031234	cytoplasm; extrinsic to internal side of plasma membrane; heterotrimeric G-protein complex; nucleus
Glyma.09G172100	qESP-9-1	GO:0002679 GO:0010200 GO:0015824 GO:0016567 GO:0035556	intracellular signal transduction; proline transport; protein ubiquitination; respiratory burst involved in defense response; response to chitin	GO:0004842	ubiquitin-protein ligase activity	GO:0005737	cytoplasm
Glyma.09G172200	qESP-9-1	GO:0006886	intracellular protein transport	GO:0003674	molecular function	GO:0005783 GO:0016021	endoplasmic reticulum; integral to membrane
Glyma.09G172300	qESP-9-1	GO:0008150	biological process	GO:0003674	molecular function	GO:0005739	mitochondrion
Glyma.09G172400	qESP-9-1	GO:0006412 GO:0006783 GO:0009965 GO:0016556 GO:0030154	cell differentiation; heme biosynthetic process; leaf morphogenesis; mRNA modification; translation	GO:0004045	aminoacyl-tRNA hydrolase activity	GO:0009507	chloroplast
Glyma.09G172500	qESP-9-1	GO:0006468 GO:0006569 GO:0008152 GO:0009611 GO:0009651 GO:0009684 GO:0009693 GO:0009873 GO:0010120 GO:0010200 GO:0019344 GO:0045893 GO:0046777	camalexin biosynthetic process; cysteine biosynthetic process; ethylene biosynthetic process; ethylene mediated signaling pathway; indoleacetic acid biosynthetic process; metabolic process; positive regulation of transcription, DNA-dependent; protein autophosphorylation; protein phosphorylation; response to chitin; response to salt stress; response to wounding; tryptophan catabolic process	GO:0004672 GO:0004674 GO:0004708 GO:0005515 GO:0005524 GO:0016301 GO:0016772 GO:0030295	ATP binding; MAP kinase kinase activity; kinase activity; protein binding; protein kinase activator activity; protein kinase activity; protein serine/threonine kinase activity; transferase activity, transferring phosphorus-containing groups	GO:0005739	mitochondrion
Glyma.09G172600	qESP-9-1	GO:0002229 GO:0006468 GO:0009862 GO:0009926 GO:0042742	auxin polar transport; defense response to bacterium; defense response to oomycetes; protein phosphorylation; systemic acquired resistance, salicylic acid mediated signaling pathway	GO:0004672 GO:0004674 GO:0004708 GO:0005524 GO:0016301 GO:0016772	ATP binding; MAP kinase kinase activity; kinase activity; protein kinase activity; protein serine/threonine kinase activity; transferase activity, transferring phosphorus-containing groups	NA	NA
Glyma.09G172700	qESP-9-1	GO:0006207 GO:0006212 GO:0006222 GO:0043562 GO:0055114	de novo' pyrimidine nucleobase biosynthetic process; UMP biosynthetic process; cellular response to nitrogen levels; oxidation-reduction process; uracil catabolic process	GO:0003824 GO:0004152 GO:0004158 GO:0016627 GO:0017113	catalytic activity; dihydroorotate dehydrogenase activity; dihydroorotate oxidase activity; dihydropyrimidine dehydrogenase (NADP+) activity; oxidoreductase activity, acting on the CH-CH group of donors	GO:0005737 GO:0005886 GO:0009507 GO:0009536 GO:0009570	chloroplast; chloroplast stroma; cytoplasm; plasma membrane; plastid
Glyma.09G172800	qESP-9-1	GO:0001708 GO:0010589 GO:0045893	cell fate specification; leaf proximal/distal pattern formation; positive regulation of transcription, DNA-dependent	GO:0003677	DNA binding	GO:0005634 GO:0005737	cytoplasm; nucleus
Glyma.09G172900	qESP-9-1	GO:0001708 GO:0010589 GO:0045893	cell fate specification; leaf proximal/distal pattern formation; positive regulation of transcription, DNA-dependent	GO:0003677	DNA binding	GO:0005634 GO:0005737	cytoplasm; nucleus
Glyma.09G173000	qESP-9-1	GO:0006355 GO:0006914 GO:0009610 GO:0009642 GO:0009651 GO:0009697 GO:0010188 GO:0010310 GO:0042742	autophagy; defense response to bacterium; regulation of hydrogen peroxide metabolic process; regulation of transcription, DNA-dependent; response to light intensity; response to microbial phytotoxin; response to salt stress; response to symbiotic fungus; salicylic acid biosynthetic process	GO:0003700 GO:0008270	sequence-specific DNA binding transcription factor activity; zinc ion binding	GO:0005634	nucleus
Glyma.09G173100	qESP-9-1	GO:0006396	RNA processing	GO:0003723 GO:0016779	RNA binding; nucleotidyltransferase activity	GO:0005739	mitochondrion
[truncated: 2,688 more rows]
