# Supplementary material for: Identifying Soybean Pod Borer (Leguminivora glycinivorella) Resistance QTLs and the Mechanism of Induced Defense Using Linkage Mapping and RNA-Seq Analysis
Source: Int J Mol Sci. 2022 Sep 18;23(18):10910. doi: 10.3390/ijms231810910 (PMC9504297; doi:10.3390/ijms231810910)
Supplement: Supplementary file 1 [file ijms-23-10910-s001.zip › Table S3.xlsx]

## Sheet: Common response to SPB
Gene Ontology (GO) enrichment analysis (Benjamini-Hochberg method,p.adjust<0.05) of the common differently expressed genes [DEGs,(|log2 fold change|≥1 and p adjust <0.05)] for response to SPB between two parents
ONTOLOGY	ID	Description	GeneRatio	BgRatio	p.adjust	geneID	Count
BP	GO:0009611	response to wounding	11/351	26/16967	1.05341e-09	Glyma.11G038600/Glyma.12G073000/Glyma.13G112000/Glyma.20G065500/Glyma.07G041400/Glyma.16G010000/Glyma.13G219100/Glyma.05G141200/Glyma.08G096500/Glyma.15G093100/Glyma.U021800	11
BP	GO:2000022	regulation of jasmonic acid mediated signaling pathway	9/351	25/16967	3.24506e-07	Glyma.11G038600/Glyma.13G112000/Glyma.20G065500/Glyma.07G041400/Glyma.16G010000/Glyma.13G219100/Glyma.05G141200/Glyma.08G096500/Glyma.15G093100	9
BP	GO:0031347	regulation of defense response	11/351	45/16967	3.24506e-07	Glyma.11G038600/Glyma.13G112000/Glyma.20G065500/Glyma.07G041400/Glyma.02G009500/Glyma.16G010000/Glyma.10G010100/Glyma.13G219100/Glyma.05G141200/Glyma.08G096500/Glyma.15G093100	11
BP	GO:0048583	regulation of response to stimulus	20/351	210/16967	1.22665e-06	Glyma.07G199800/Glyma.05G155600/Glyma.11G038600/Glyma.12G073000/Glyma.13G112000/Glyma.07G013500/Glyma.20G065500/Glyma.13G176600/Glyma.07G041400/Glyma.02G009500/Glyma.05G197000/Glyma.08G197500/Glyma.16G010000/Glyma.10G010100/Glyma.15G088100/Glyma.13G219100/Glyma.05G141200/Glyma.08G096500/Glyma.15G093100/Glyma.U021800	20
BP	GO:0009753	response to jasmonic acid	9/351	33/16967	1.22665e-06	Glyma.11G038600/Glyma.13G112000/Glyma.20G065500/Glyma.07G041400/Glyma.16G010000/Glyma.13G219100/Glyma.05G141200/Glyma.08G096500/Glyma.15G093100	9
BP	GO:0009867	jasmonic acid mediated signaling pathway	9/351	33/16967	1.22665e-06	Glyma.11G038600/Glyma.13G112000/Glyma.20G065500/Glyma.07G041400/Glyma.16G010000/Glyma.13G219100/Glyma.05G141200/Glyma.08G096500/Glyma.15G093100	9
BP	GO:0070542	response to fatty acid	9/351	33/16967	1.22665e-06	Glyma.11G038600/Glyma.13G112000/Glyma.20G065500/Glyma.07G041400/Glyma.16G010000/Glyma.13G219100/Glyma.05G141200/Glyma.08G096500/Glyma.15G093100	9
BP	GO:0071395	cellular response to jasmonic acid stimulus	9/351	33/16967	1.22665e-06	Glyma.11G038600/Glyma.13G112000/Glyma.20G065500/Glyma.07G041400/Glyma.16G010000/Glyma.13G219100/Glyma.05G141200/Glyma.08G096500/Glyma.15G093100	9
BP	GO:0071398	cellular response to fatty acid	9/351	33/16967	1.22665e-06	Glyma.11G038600/Glyma.13G112000/Glyma.20G065500/Glyma.07G041400/Glyma.16G010000/Glyma.13G219100/Glyma.05G141200/Glyma.08G096500/Glyma.15G093100	9
BP	GO:1901701	cellular response to oxygen-containing compound	20/351	216/16967	1.68894e-06	Glyma.07G199800/Glyma.11G038600/Glyma.09G040600/Glyma.13G112000/Glyma.20G065500/Glyma.13G176600/Glyma.07G041400/Glyma.05G197000/Glyma.17G030400/Glyma.16G010000/Glyma.15G088100/Glyma.15G145900/Glyma.14G121200/Glyma.13G219100/Glyma.05G141200/Glyma.09G040400/Glyma.08G096500/Glyma.15G093100/Glyma.07G268400/Glyma.07G243900	20
BP	GO:0080134	regulation of response to stress	13/351	87/16967	1.68894e-06	Glyma.11G038600/Glyma.12G073000/Glyma.13G112000/Glyma.20G065500/Glyma.07G041400/Glyma.02G009500/Glyma.16G010000/Glyma.10G010100/Glyma.13G219100/Glyma.05G141200/Glyma.08G096500/Glyma.15G093100/Glyma.U021800	13
BP	GO:0009607	response to biotic stimulus	21/351	250/16967	3.51213e-06	Glyma.07G199800/Glyma.20G225200/Glyma.12G073000/Glyma.18G185400/Glyma.16G145600/Glyma.09G151400/Glyma.13G176600/Glyma.02G009500/Glyma.17G166600/Glyma.17G030400/Glyma.11G093100/Glyma.07G183900/Glyma.10G010100/Glyma.15G088100/Glyma.05G198500/Glyma.09G040400/Glyma.19G245400/Glyma.18G219700/Glyma.03G093600/Glyma.U021800/Glyma.18G191600	21
BP	GO:0040011	locomotion	6/351	14/16967	1.06793e-05	Glyma.12G073000/Glyma.06G319500/Glyma.02G136700/Glyma.13G087500/Glyma.07G208700/Glyma.U021800	6
BP	GO:1901700	response to oxygen-containing compound	25/351	385/16967	2.46614e-05	Glyma.07G199800/Glyma.11G038600/Glyma.09G040600/Glyma.12G073000/Glyma.13G112000/Glyma.20G065500/Glyma.17G079000/Glyma.13G176600/Glyma.07G041400/Glyma.05G197000/Glyma.17G030400/Glyma.16G010000/Glyma.15G088100/Glyma.15G145900/Glyma.14G121200/Glyma.13G219100/Glyma.05G141200/Glyma.09G040400/Glyma.08G096500/Glyma.15G093100/Glyma.05G020400/Glyma.07G268400/Glyma.U021800/Glyma.04G108500/Glyma.07G243900	25
BP	GO:0009966	regulation of signal transduction	14/351	133/16967	2.80379e-05	Glyma.07G199800/Glyma.05G155600/Glyma.11G038600/Glyma.13G112000/Glyma.20G065500/Glyma.13G176600/Glyma.07G041400/Glyma.05G197000/Glyma.16G010000/Glyma.15G088100/Glyma.13G219100/Glyma.05G141200/Glyma.08G096500/Glyma.15G093100	14
BP	GO:0010646	regulation of cell communication	14/351	133/16967	2.80379e-05	Glyma.07G199800/Glyma.05G155600/Glyma.11G038600/Glyma.13G112000/Glyma.20G065500/Glyma.13G176600/Glyma.07G041400/Glyma.05G197000/Glyma.16G010000/Glyma.15G088100/Glyma.13G219100/Glyma.05G141200/Glyma.08G096500/Glyma.15G093100	14
BP	GO:0023051	regulation of signaling	14/351	133/16967	2.80379e-05	Glyma.07G199800/Glyma.05G155600/Glyma.11G038600/Glyma.13G112000/Glyma.20G065500/Glyma.13G176600/Glyma.07G041400/Glyma.05G197000/Glyma.16G010000/Glyma.15G088100/Glyma.13G219100/Glyma.05G141200/Glyma.08G096500/Glyma.15G093100	14
BP	GO:0002376	immune system process	17/351	200/16967	3.2243e-05	Glyma.07G199800/Glyma.20G225200/Glyma.12G073000/Glyma.18G185400/Glyma.09G151400/Glyma.13G176600/Glyma.02G009500/Glyma.17G166600/Glyma.11G093100/Glyma.07G183900/Glyma.10G010100/Glyma.15G088100/Glyma.05G198500/Glyma.19G245400/Glyma.18G219700/Glyma.U021800/Glyma.18G191600	17
BP	GO:0006955	immune response	17/351	200/16967	3.2243e-05	Glyma.07G199800/Glyma.20G225200/Glyma.12G073000/Glyma.18G185400/Glyma.09G151400/Glyma.13G176600/Glyma.02G009500/Glyma.17G166600/Glyma.11G093100/Glyma.07G183900/Glyma.10G010100/Glyma.15G088100/Glyma.05G198500/Glyma.19G245400/Glyma.18G219700/Glyma.U021800/Glyma.18G191600	17
BP	GO:0098542	defense response to other organism	17/351	200/16967	3.2243e-05	Glyma.07G199800/Glyma.20G225200/Glyma.12G073000/Glyma.18G185400/Glyma.09G151400/Glyma.13G176600/Glyma.02G009500/Glyma.17G166600/Glyma.11G093100/Glyma.07G183900/Glyma.10G010100/Glyma.15G088100/Glyma.05G198500/Glyma.19G245400/Glyma.18G219700/Glyma.U021800/Glyma.18G191600	17
BP	GO:0043207	response to external biotic stimulus	17/351	201/16967	3.2243e-05	Glyma.07G199800/Glyma.20G225200/Glyma.12G073000/Glyma.18G185400/Glyma.09G151400/Glyma.13G176600/Glyma.02G009500/Glyma.17G166600/Glyma.11G093100/Glyma.07G183900/Glyma.10G010100/Glyma.15G088100/Glyma.05G198500/Glyma.19G245400/Glyma.18G219700/Glyma.U021800/Glyma.18G191600	17
BP	GO:0051707	response to other organism	17/351	201/16967	3.2243e-05	Glyma.07G199800/Glyma.20G225200/Glyma.12G073000/Glyma.18G185400/Glyma.09G151400/Glyma.13G176600/Glyma.02G009500/Glyma.17G166600/Glyma.11G093100/Glyma.07G183900/Glyma.10G010100/Glyma.15G088100/Glyma.05G198500/Glyma.19G245400/Glyma.18G219700/Glyma.U021800/Glyma.18G191600	17
BP	GO:0071396	cellular response to lipid	15/351	161/16967	3.9959e-05	Glyma.11G038600/Glyma.09G040600/Glyma.13G112000/Glyma.20G065500/Glyma.07G041400/Glyma.17G030400/Glyma.16G010000/Glyma.15G145900/Glyma.13G219100/Glyma.05G141200/Glyma.09G040400/Glyma.08G096500/Glyma.15G093100/Glyma.07G268400/Glyma.07G243900	15
BP	GO:0044419	biological process involved in interspecies interaction between organisms	17/351	210/16967	5.42188e-05	Glyma.07G199800/Glyma.20G225200/Glyma.12G073000/Glyma.18G185400/Glyma.09G151400/Glyma.13G176600/Glyma.02G009500/Glyma.17G166600/Glyma.11G093100/Glyma.07G183900/Glyma.10G010100/Glyma.15G088100/Glyma.05G198500/Glyma.19G245400/Glyma.18G219700/Glyma.U021800/Glyma.18G191600	17
BP	GO:0033993	response to lipid	17/351	215/16967	7.18436e-05	Glyma.11G038600/Glyma.09G040600/Glyma.13G112000/Glyma.20G065500/Glyma.17G079000/Glyma.07G041400/Glyma.17G030400/Glyma.16G010000/Glyma.15G145900/Glyma.13G219100/Glyma.05G141200/Glyma.09G040400/Glyma.08G096500/Glyma.15G093100/Glyma.05G020400/Glyma.07G268400/Glyma.07G243900	17
BP	GO:0044273	sulfur compound catabolic process	6/351	26/16967	0.000331791	Glyma.11G129900/Glyma.11G235800/Glyma.04G077300/Glyma.12G054100/Glyma.12G054200/Glyma.12G053900	6
BP	GO:0009605	response to external stimulus	21/351	359/16967	0.00052516	Glyma.07G199800/Glyma.20G225200/Glyma.12G073000/Glyma.18G185400/Glyma.09G151400/Glyma.13G176600/Glyma.02G009500/Glyma.17G166600/Glyma.11G093100/Glyma.18G261900/Glyma.07G183900/Glyma.10G010100/Glyma.15G088100/Glyma.05G198500/Glyma.19G245400/Glyma.02G136700/Glyma.18G219700/Glyma.07G208700/Glyma.U021800/Glyma.18G191600/Glyma.09G235200	21
BP	GO:0044036	cell wall macromolecule metabolic process	13/351	164/16967	0.000949955	Glyma.08G104600/Glyma.18G003200/Glyma.07G215600/Glyma.13G095000/Glyma.18G271900/Glyma.17G065200/Glyma.19G033500/Glyma.17G065000/Glyma.17G065100/Glyma.13G095200/Glyma.02G007400/Glyma.13G095300/Glyma.16G045000	13
BP	GO:0010383	cell wall polysaccharide metabolic process	12/351	149/16967	0.00155824	Glyma.08G104600/Glyma.18G003200/Glyma.07G215600/Glyma.13G095000/Glyma.18G271900/Glyma.17G065200/Glyma.19G033500/Glyma.17G065000/Glyma.17G065100/Glyma.13G095200/Glyma.13G095300/Glyma.16G045000	12
BP	GO:0010411	xyloglucan metabolic process	8/351	73/16967	0.003047	Glyma.18G003200/Glyma.13G095000/Glyma.17G065200/Glyma.17G065000/Glyma.17G065100/Glyma.13G095200/Glyma.13G095300/Glyma.16G045000	8
BP	GO:0009617	response to bacterium	8/351	75/16967	0.00345916	Glyma.20G225200/Glyma.12G073000/Glyma.18G185400/Glyma.09G151400/Glyma.07G183900/Glyma.19G245400/Glyma.18G219700/Glyma.U021800	8
BP	GO:0042742	defense response to bacterium	8/351	75/16967	0.00345916	Glyma.20G225200/Glyma.12G073000/Glyma.18G185400/Glyma.09G151400/Glyma.07G183900/Glyma.19G245400/Glyma.18G219700/Glyma.U021800	8
BP	GO:0006829	zinc ion transport	5/351	27/16967	0.00413451	Glyma.13G338300/Glyma.08G164400/Glyma.15G262800/Glyma.13G004400/Glyma.18G060300	5
BP	GO:0071577	zinc ion transmembrane transport	5/351	27/16967	0.00413451	Glyma.13G338300/Glyma.08G164400/Glyma.15G262800/Glyma.13G004400/Glyma.18G060300	5
BP	GO:0042546	cell wall biogenesis	14/351	220/16967	0.00413451	Glyma.08G104600/Glyma.18G003200/Glyma.07G215600/Glyma.13G095000/Glyma.18G271900/Glyma.17G065200/Glyma.19G033500/Glyma.08G249900/Glyma.05G161900/Glyma.17G065000/Glyma.17G065100/Glyma.13G095200/Glyma.13G095300/Glyma.16G045000	14
BP	GO:0016145	S-glycoside catabolic process	4/351	16/16967	0.00482686	Glyma.11G129900/Glyma.12G054100/Glyma.12G054200/Glyma.12G053900	4
BP	GO:0019759	glycosinolate catabolic process	4/351	16/16967	0.00482686	Glyma.11G129900/Glyma.12G054100/Glyma.12G054200/Glyma.12G053900	4
BP	GO:0019762	glucosinolate catabolic process	4/351	16/16967	0.00482686	Glyma.11G129900/Glyma.12G054100/Glyma.12G054200/Glyma.12G053900	4
BP	GO:0048868	pollen tube development	4/351	16/16967	0.00482686	Glyma.12G073000/Glyma.02G136700/Glyma.07G208700/Glyma.U021800	4
BP	GO:0019748	secondary metabolic process	10/351	125/16967	0.00482686	Glyma.05G155600/Glyma.12G073000/Glyma.11G129900/Glyma.08G109500/Glyma.12G054100/Glyma.02G130400/Glyma.12G054200/Glyma.12G053900/Glyma.U021800/Glyma.08G109300	10
BP	GO:0009651	response to salt stress	7/351	64/16967	0.00557033	Glyma.12G073000/Glyma.11G129900/Glyma.12G054100/Glyma.12G054200/Glyma.12G053900/Glyma.U021800/Glyma.04G108500	7
BP	GO:0016143	S-glycoside metabolic process	4/351	17/16967	0.00557033	Glyma.11G129900/Glyma.12G054100/Glyma.12G054200/Glyma.12G053900	4
BP	GO:0019757	glycosinolate metabolic process	4/351	17/16967	0.00557033	Glyma.11G129900/Glyma.12G054100/Glyma.12G054200/Glyma.12G053900	4
BP	GO:0019760	glucosinolate metabolic process	4/351	17/16967	0.00557033	Glyma.11G129900/Glyma.12G054100/Glyma.12G054200/Glyma.12G053900	4
BP	GO:0010410	hemicellulose metabolic process	10/351	131/16967	0.00625643	Glyma.08G104600/Glyma.18G003200/Glyma.07G215600/Glyma.13G095000/Glyma.17G065200/Glyma.17G065000/Glyma.17G065100/Glyma.13G095200/Glyma.13G095300/Glyma.16G045000	10
BP	GO:0006970	response to osmotic stress	7/351	68/16967	0.00771553	Glyma.12G073000/Glyma.11G129900/Glyma.12G054100/Glyma.12G054200/Glyma.12G053900/Glyma.U021800/Glyma.04G108500	7
BP	GO:0071554	cell wall organization or biogenesis	22/351	486/16967	0.0079049	Glyma.01G050100/Glyma.08G104600/Glyma.18G003200/Glyma.07G215600/Glyma.13G095000/Glyma.04G236200/Glyma.18G271900/Glyma.17G065200/Glyma.19G033500/Glyma.08G249900/Glyma.18G179800/Glyma.05G161900/Glyma.17G065000/Glyma.12G062700/Glyma.17G065100/Glyma.13G095200/Glyma.18G224200/Glyma.02G109100/Glyma.02G007400/Glyma.14G068000/Glyma.13G095300/Glyma.16G045000	22
BP	GO:0044042	glucan metabolic process	14/351	249/16967	0.0104944	Glyma.10G106600/Glyma.18G003200/Glyma.13G095000/Glyma.18G271900/Glyma.02G293900/Glyma.17G065200/Glyma.19G033500/Glyma.17G065000/Glyma.17G065100/Glyma.13G095200/Glyma.12G042400/Glyma.13G095300/Glyma.16G045000/Glyma.10G041400	14
BP	GO:0045229	external encapsulating structure organization	18/351	374/16967	0.0120246	Glyma.01G050100/Glyma.18G003200/Glyma.13G095000/Glyma.04G236200/Glyma.18G271900/Glyma.17G065200/Glyma.01G036900/Glyma.19G033500/Glyma.18G179800/Glyma.17G065000/Glyma.12G062700/Glyma.17G065100/Glyma.13G095200/Glyma.18G224200/Glyma.02G109100/Glyma.14G068000/Glyma.13G095300/Glyma.16G045000	18
BP	GO:0031407	oxylipin metabolic process	5/351	37/16967	0.0129312	Glyma.07G196800/Glyma.13G109800/Glyma.13G030300/Glyma.15G026500/Glyma.13G347800	5
BP	GO:0031408	oxylipin biosynthetic process	5/351	37/16967	0.0129312	Glyma.07G196800/Glyma.13G109800/Glyma.13G030300/Glyma.15G026500/Glyma.13G347800	5
BP	GO:2000031	regulation of salicylic acid mediated signaling pathway	4/351	22/16967	0.0133505	Glyma.07G199800/Glyma.13G176600/Glyma.05G197000/Glyma.15G088100	4
BP	GO:0071555	cell wall organization	17/351	351/16967	0.0143662	Glyma.01G050100/Glyma.18G003200/Glyma.13G095000/Glyma.04G236200/Glyma.18G271900/Glyma.17G065200/Glyma.19G033500/Glyma.18G179800/Glyma.17G065000/Glyma.12G062700/Glyma.17G065100/Glyma.13G095200/Glyma.18G224200/Glyma.02G109100/Glyma.14G068000/Glyma.13G095300/Glyma.16G045000	17
BP	GO:0044550	secondary metabolite biosynthetic process	5/351	39/16967	0.0155959	Glyma.12G073000/Glyma.08G109500/Glyma.02G130400/Glyma.U021800/Glyma.08G109300	5
BP	GO:0030638	polyketide metabolic process	3/351	11/16967	0.016185	Glyma.08G109500/Glyma.02G130400/Glyma.08G109300	3
BP	GO:0030639	polyketide biosynthetic process	3/351	11/16967	0.016185	Glyma.08G109500/Glyma.02G130400/Glyma.08G109300	3
BP	GO:1901136	carbohydrate derivative catabolic process	7/351	80/16967	0.016522	Glyma.11G129900/Glyma.15G206800/Glyma.12G054100/Glyma.12G054200/Glyma.12G053900/Glyma.19G245400/Glyma.02G007400	7
BP	GO:0006073	cellular glucan metabolic process	13/351	240/16967	0.0186603	Glyma.18G003200/Glyma.13G095000/Glyma.18G271900/Glyma.02G293900/Glyma.17G065200/Glyma.19G033500/Glyma.17G065000/Glyma.17G065100/Glyma.13G095200/Glyma.12G042400/Glyma.13G095300/Glyma.16G045000/Glyma.10G041400	13
BP	GO:0009065	glutamine family amino acid catabolic process	4/351	25/16967	0.0193777	Glyma.02G072200/Glyma.04G007700/Glyma.05G136100/Glyma.16G153400	4
BP	GO:0044264	cellular polysaccharide metabolic process	15/351	305/16967	0.0211496	Glyma.08G104600/Glyma.18G003200/Glyma.07G215600/Glyma.13G095000/Glyma.18G271900/Glyma.02G293900/Glyma.17G065200/Glyma.19G033500/Glyma.17G065000/Glyma.17G065100/Glyma.13G095200/Glyma.12G042400/Glyma.13G095300/Glyma.16G045000/Glyma.10G041400	15
BP	GO:0009863	salicylic acid mediated signaling pathway	4/351	26/16967	0.0214411	Glyma.07G199800/Glyma.13G176600/Glyma.05G197000/Glyma.15G088100	4
BP	GO:0071446	cellular response to salicylic acid stimulus	4/351	26/16967	0.0214411	Glyma.07G199800/Glyma.13G176600/Glyma.05G197000/Glyma.15G088100	4
BP	GO:0006851	mitochondrial calcium ion transmembrane transport	3/351	13/16967	0.0230827	Glyma.11G202000/Glyma.02G238500/Glyma.16G142100	3
BP	GO:0036444	calcium import into the mitochondrion	3/351	13/16967	0.0230827	Glyma.11G202000/Glyma.02G238500/Glyma.16G142100	3
BP	GO:0060401	cytosolic calcium ion transport	3/351	13/16967	0.0230827	Glyma.11G202000/Glyma.02G238500/Glyma.16G142100	3
BP	GO:0070509	calcium ion import	3/351	13/16967	0.0230827	Glyma.11G202000/Glyma.02G238500/Glyma.16G142100	3
BP	GO:0009737	response to abscisic acid	8/351	113/16967	0.0250923	Glyma.09G040600/Glyma.17G079000/Glyma.17G030400/Glyma.15G145900/Glyma.09G040400/Glyma.05G020400/Glyma.07G268400/Glyma.07G243900	8
BP	GO:0097305	response to alcohol	8/351	113/16967	0.0250923	Glyma.09G040600/Glyma.17G079000/Glyma.17G030400/Glyma.15G145900/Glyma.09G040400/Glyma.05G020400/Glyma.07G268400/Glyma.07G243900	8
BP	GO:0000041	transition metal ion transport	5/351	46/16967	0.0258275	Glyma.13G338300/Glyma.08G164400/Glyma.15G262800/Glyma.13G004400/Glyma.18G060300	5
BP	GO:0006538	glutamate catabolic process	3/351	14/16967	0.0268932	Glyma.02G072200/Glyma.05G136100/Glyma.16G153400	3
BP	GO:0051560	mitochondrial calcium ion homeostasis	3/351	14/16967	0.0268932	Glyma.11G202000/Glyma.02G238500/Glyma.16G142100	3
BP	GO:0072330	monocarboxylic acid biosynthetic process	11/351	202/16967	0.031763	Glyma.07G196800/Glyma.04G149300/Glyma.03G232500/Glyma.13G109800/Glyma.13G030300/Glyma.15G026500/Glyma.18G280900/Glyma.10G148700/Glyma.13G347800/Glyma.19G229400/Glyma.08G256600	11
BP	GO:0009695	jasmonic acid biosynthetic process	3/351	15/16967	0.031763	Glyma.13G109800/Glyma.18G280900/Glyma.08G256600	3
BP	GO:0043649	dicarboxylic acid catabolic process	3/351	15/16967	0.031763	Glyma.02G072200/Glyma.05G136100/Glyma.16G153400	3
BP	GO:0006790	sulfur compound metabolic process	16/351	359/16967	0.0323586	Glyma.12G073000/Glyma.11G129900/Glyma.19G210300/Glyma.17G066500/Glyma.11G235800/Glyma.07G071300/Glyma.08G174700/Glyma.04G077300/Glyma.08G118700/Glyma.12G054100/Glyma.01G106000/Glyma.12G054200/Glyma.10G172700/Glyma.12G053900/Glyma.U021800/Glyma.03G176300	16
BP	GO:0045087	innate immune response	4/351	31/16967	0.0333985	Glyma.07G199800/Glyma.13G176600/Glyma.17G166600/Glyma.15G088100	4
BP	GO:0009738	abscisic acid-activated signaling pathway	6/351	72/16967	0.0333985	Glyma.09G040600/Glyma.17G030400/Glyma.15G145900/Glyma.09G040400/Glyma.07G268400/Glyma.07G243900	6
BP	GO:0071215	cellular response to abscisic acid stimulus	6/351	72/16967	0.0333985	Glyma.09G040600/Glyma.17G030400/Glyma.15G145900/Glyma.09G040400/Glyma.07G268400/Glyma.07G243900	6
BP	GO:0097306	cellular response to alcohol	6/351	72/16967	0.0333985	Glyma.09G040600/Glyma.17G030400/Glyma.15G145900/Glyma.09G040400/Glyma.07G268400/Glyma.07G243900	6
BP	GO:0009697	salicylic acid biosynthetic process	3/351	16/16967	0.0345351	Glyma.03G232500/Glyma.10G148700/Glyma.19G229400	3
BP	GO:0010337	regulation of salicylic acid metabolic process	3/351	16/16967	0.0345351	Glyma.03G232500/Glyma.10G148700/Glyma.19G229400	3
BP	GO:0080142	regulation of salicylic acid biosynthetic process	3/351	16/16967	0.0345351	Glyma.03G232500/Glyma.10G148700/Glyma.19G229400	3
BP	GO:0009751	response to salicylic acid	4/351	32/16967	0.0345351	Glyma.07G199800/Glyma.13G176600/Glyma.05G197000/Glyma.15G088100	4
BP	GO:1901658	glycosyl compound catabolic process	4/351	32/16967	0.0345351	Glyma.11G129900/Glyma.12G054100/Glyma.12G054200/Glyma.12G053900	4
BP	GO:0009664	plant-type cell wall organization	6/351	74/16967	0.0355633	Glyma.01G050100/Glyma.18G271900/Glyma.19G033500/Glyma.12G062700/Glyma.02G109100/Glyma.14G068000	6
BP	GO:0046189	phenol-containing compound biosynthetic process	3/351	17/16967	0.0396147	Glyma.03G232500/Glyma.10G148700/Glyma.19G229400	3
BP	GO:0042743	hydrogen peroxide metabolic process	9/351	156/16967	0.042059	Glyma.05G103600/Glyma.18G211000/Glyma.13G167100/Glyma.15G129200/Glyma.02G234200/Glyma.06G275900/Glyma.16G164400/Glyma.03G007700/Glyma.16G164200	9
BP	GO:0042744	hydrogen peroxide catabolic process	9/351	156/16967	0.042059	Glyma.05G103600/Glyma.18G211000/Glyma.13G167100/Glyma.15G129200/Glyma.02G234200/Glyma.06G275900/Glyma.16G164400/Glyma.03G007700/Glyma.16G164200	9
BP	GO:0030001	metal ion transport	9/351	159/16967	0.0470056	Glyma.13G338300/Glyma.08G164400/Glyma.11G202000/Glyma.15G262800/Glyma.08G091900/Glyma.02G238500/Glyma.13G004400/Glyma.16G142100/Glyma.18G060300	9
BP	GO:0071669	plant-type cell wall organization or biogenesis	10/351	191/16967	0.0495655	Glyma.01G050100/Glyma.08G104600/Glyma.07G215600/Glyma.18G271900/Glyma.19G033500/Glyma.08G249900/Glyma.05G161900/Glyma.12G062700/Glyma.02G109100/Glyma.14G068000	10
BP	GO:0006026	aminoglycan catabolic process	3/351	19/16967	0.0495655	Glyma.15G206800/Glyma.19G245400/Glyma.02G007400	3
BP	GO:0006030	chitin metabolic process	3/351	19/16967	0.0495655	Glyma.15G206800/Glyma.19G245400/Glyma.02G007400	3
BP	GO:0006032	chitin catabolic process	3/351	19/16967	0.0495655	Glyma.15G206800/Glyma.19G245400/Glyma.02G007400	3
BP	GO:0046348	amino sugar catabolic process	3/351	19/16967	0.0495655	Glyma.15G206800/Glyma.19G245400/Glyma.02G007400	3
BP	GO:1901072	glucosamine-containing compound catabolic process	3/351	19/16967	0.0495655	Glyma.15G206800/Glyma.19G245400/Glyma.02G007400	3
BP	GO:0044262	cellular carbohydrate metabolic process	18/351	456/16967	0.051106	Glyma.08G137500/Glyma.08G104600/Glyma.18G003200/Glyma.07G215600/Glyma.13G095000/Glyma.18G271900/Glyma.02G293900/Glyma.17G065200/Glyma.19G033500/Glyma.07G266200/Glyma.06G318400/Glyma.17G065000/Glyma.17G065100/Glyma.13G095200/Glyma.12G042400/Glyma.13G095300/Glyma.16G045000/Glyma.10G041400	18
BP	GO:0009626	plant-type hypersensitive response	3/351	20/16967	0.0551095	Glyma.07G199800/Glyma.13G176600/Glyma.15G088100	3
BP	GO:0034050	programmed cell death induced by symbiont	3/351	20/16967	0.0551095	Glyma.07G199800/Glyma.13G176600/Glyma.15G088100	3
BP	GO:0051702	biological process involved in interaction with symbiont	3/351	20/16967	0.0551095	Glyma.07G199800/Glyma.13G176600/Glyma.15G088100	3
BP	GO:0072593	reactive oxygen species metabolic process	9/351	168/16967	0.0592464	Glyma.05G103600/Glyma.18G211000/Glyma.13G167100/Glyma.15G129200/Glyma.02G234200/Glyma.06G275900/Glyma.16G164400/Glyma.03G007700/Glyma.16G164200	9
BP	GO:0006979	response to oxidative stress	12/351	265/16967	0.0657391	Glyma.05G103600/Glyma.12G073000/Glyma.18G211000/Glyma.13G167100/Glyma.15G129200/Glyma.02G234200/Glyma.06G275900/Glyma.16G164400/Glyma.03G007700/Glyma.16G164200/Glyma.U021800/Glyma.04G108500	12
BP	GO:0012501	programmed cell death	4/351	41/16967	0.0692682	Glyma.07G199800/Glyma.13G176600/Glyma.05G197000/Glyma.15G088100	4
BP	GO:0051704	multi-organism process	8/351	145/16967	0.0732934	Glyma.12G073000/Glyma.16G093900/Glyma.07G188800/Glyma.12G022800/Glyma.02G136700/Glyma.07G208700/Glyma.11G096700/Glyma.U021800	8
BP	GO:0007166	cell surface receptor signaling pathway	4/351	42/16967	0.07389	Glyma.09G181400/Glyma.14G157700/Glyma.09G253200/Glyma.07G096100	4
BP	GO:0050832	defense response to fungus	4/351	44/16967	0.0859569	Glyma.20G225200/Glyma.12G073000/Glyma.19G245400/Glyma.U021800	4
BP	GO:0009620	response to fungus	4/351	45/16967	0.0919662	Glyma.20G225200/Glyma.12G073000/Glyma.19G245400/Glyma.U021800	4
BP	GO:0098662	inorganic cation transmembrane transport	8/351	153/16967	0.0952176	Glyma.13G338300/Glyma.08G164400/Glyma.11G202000/Glyma.15G262800/Glyma.02G238500/Glyma.13G004400/Glyma.16G142100/Glyma.18G060300	8
BP	GO:0008219	cell death	4/351	46/16967	0.0963955	Glyma.07G199800/Glyma.13G176600/Glyma.05G197000/Glyma.15G088100	4
BP	GO:0042537	benzene-containing compound metabolic process	4/351	46/16967	0.0963955	Glyma.02G255400/Glyma.03G232500/Glyma.10G148700/Glyma.19G229400	4
BP	GO:0006022	aminoglycan metabolic process	3/351	26/16967	0.101421	Glyma.15G206800/Glyma.19G245400/Glyma.02G007400	3
BP	GO:0010565	regulation of cellular ketone metabolic process	3/351	26/16967	0.101421	Glyma.03G232500/Glyma.10G148700/Glyma.19G229400	3
BP	GO:1901071	glucosamine-containing compound metabolic process	3/351	26/16967	0.101421	Glyma.15G206800/Glyma.19G245400/Glyma.02G007400	3
BP	GO:0009095	aromatic amino acid family biosynthetic process, prephenate pathway	2/351	10/16967	0.10667	Glyma.11G233900/Glyma.18G023100	2
BP	GO:0010224	response to UV-B	2/351	10/16967	0.10667	Glyma.12G073000/Glyma.U021800	2
BP	GO:1901606	alpha-amino acid catabolic process	5/351	73/16967	0.10667	Glyma.02G255400/Glyma.02G072200/Glyma.04G007700/Glyma.05G136100/Glyma.16G153400	5
BP	GO:0006749	glutathione metabolic process	6/351	100/16967	0.10667	Glyma.11G235800/Glyma.08G174700/Glyma.04G077300/Glyma.08G118700/Glyma.01G106000/Glyma.03G176300	6
BP	GO:0009812	flavonoid metabolic process	3/351	27/16967	0.10667	Glyma.08G109500/Glyma.02G130400/Glyma.08G109300	3
BP	GO:0009813	flavonoid biosynthetic process	3/351	27/16967	0.10667	Glyma.08G109500/Glyma.02G130400/Glyma.08G109300	3
BP	GO:0009856	pollination	6/351	101/16967	0.108758	Glyma.12G073000/Glyma.16G093900/Glyma.07G188800/Glyma.02G136700/Glyma.07G208700/Glyma.U021800	6
BP	GO:0044706	multi-multicellular organism process	6/351	101/16967	0.108758	Glyma.12G073000/Glyma.16G093900/Glyma.07G188800/Glyma.02G136700/Glyma.07G208700/Glyma.U021800	6
BP	GO:0098655	cation transmembrane transport	8/351	161/16967	0.111097	Glyma.13G338300/Glyma.08G164400/Glyma.11G202000/Glyma.15G262800/Glyma.02G238500/Glyma.13G004400/Glyma.16G142100/Glyma.18G060300	8
BP	GO:0018105	peptidyl-serine phosphorylation	7/351	131/16967	0.111671	Glyma.18G096500/Glyma.01G166100/Glyma.04G082900/Glyma.19G201400/Glyma.06G084300/Glyma.03G204100/Glyma.08G316500	7
BP	GO:0042430	indole-containing compound metabolic process	3/351	28/16967	0.112895	Glyma.02G255400/Glyma.12G073000/Glyma.U021800	3
BP	GO:0018209	peptidyl-serine modification	7/351	132/16967	0.114041	Glyma.18G096500/Glyma.01G166100/Glyma.04G082900/Glyma.19G201400/Glyma.06G084300/Glyma.03G204100/Glyma.08G316500	7
BP	GO:0043171	peptide catabolic process	2/351	11/16967	0.117509	Glyma.11G235800/Glyma.04G077300	2
BP	GO:0006536	glutamate metabolic process	3/351	29/16967	0.119189	Glyma.02G072200/Glyma.05G136100/Glyma.16G153400	3
BP	GO:0009696	salicylic acid metabolic process	3/351	29/16967	0.119189	Glyma.03G232500/Glyma.10G148700/Glyma.19G229400	3
BP	GO:0044403	biological process involved in symbiotic interaction	3/351	29/16967	0.119189	Glyma.07G199800/Glyma.13G176600/Glyma.15G088100	3
BP	GO:0009694	jasmonic acid metabolic process	3/351	30/16967	0.129439	Glyma.13G109800/Glyma.18G280900/Glyma.08G256600	3
BP	GO:0071407	cellular response to organic cyclic compound	4/351	54/16967	0.137853	Glyma.07G199800/Glyma.13G176600/Glyma.05G197000/Glyma.15G088100	4
BP	GO:0018958	phenol-containing compound metabolic process	3/351	31/16967	0.137956	Glyma.03G232500/Glyma.10G148700/Glyma.19G229400	3
BP	GO:0062012	regulation of small molecule metabolic process	3/351	31/16967	0.137956	Glyma.03G232500/Glyma.10G148700/Glyma.19G229400	3
BP	GO:0046777	protein autophosphorylation	8/351	171/16967	0.138937	Glyma.18G096500/Glyma.01G166100/Glyma.11G204700/Glyma.19G201400/Glyma.02G288600/Glyma.03G204100/Glyma.08G316500/Glyma.15G072200	8
BP	GO:0098660	inorganic ion transmembrane transport	8/351	172/16967	0.142132	Glyma.13G338300/Glyma.08G164400/Glyma.11G202000/Glyma.15G262800/Glyma.02G238500/Glyma.13G004400/Glyma.16G142100/Glyma.18G060300	8
BP	GO:0070588	calcium ion transmembrane transport	3/351	32/16967	0.145708	Glyma.11G202000/Glyma.02G238500/Glyma.16G142100	3
BP	GO:0034406	cell wall beta-glucan metabolic process	2/351	13/16967	0.145708	Glyma.18G271900/Glyma.19G033500	2
BP	GO:0034410	cell wall beta-glucan biosynthetic process	2/351	13/16967	0.145708	Glyma.18G271900/Glyma.19G033500	2
BP	GO:0052324	plant-type cell wall cellulose biosynthetic process	2/351	13/16967	0.145708	Glyma.18G271900/Glyma.19G033500	2
BP	GO:0052541	plant-type cell wall cellulose metabolic process	2/351	13/16967	0.145708	Glyma.18G271900/Glyma.19G033500	2
BP	GO:0042180	cellular ketone metabolic process	5/351	83/16967	0.145708	Glyma.02G255400/Glyma.03G232500/Glyma.10G148700/Glyma.19G229400/Glyma.09G236500	5
BP	GO:0035556	intracellular signal transduction	16/351	464/16967	0.162038	Glyma.13G119500/Glyma.18G096500/Glyma.12G073000/Glyma.01G166100/Glyma.05G081900/Glyma.19G201400/Glyma.02G027400/Glyma.07G049400/Glyma.18G027300/Glyma.03G204100/Glyma.08G316500/Glyma.19G260400/Glyma.19G171400/Glyma.02G235700/Glyma.01G204200/Glyma.14G203700	16
BP	GO:0034220	ion transmembrane transport	9/351	212/16967	0.162038	Glyma.13G338300/Glyma.08G164400/Glyma.11G202000/Glyma.15G262800/Glyma.02G238500/Glyma.15G115200/Glyma.13G004400/Glyma.16G142100/Glyma.18G060300	9
BP	GO:0080163	regulation of protein serine/threonine phosphatase activity	3/351	34/16967	0.162038	Glyma.09G040600/Glyma.17G030400/Glyma.15G145900	3
BP	GO:2000028	regulation of photoperiodism, flowering	2/351	14/16967	0.162038	Glyma.07G013500/Glyma.08G197500	2
BP	GO:0009110	vitamin biosynthetic process	5/351	88/16967	0.174858	Glyma.19G210300/Glyma.17G066500/Glyma.15G055700/Glyma.08G177300/Glyma.09G236500	5
BP	GO:0048573	photoperiodism, flowering	2/351	15/16967	0.181929	Glyma.07G013500/Glyma.08G197500	2
BP	GO:0014070	response to organic cyclic compound	4/351	62/16967	0.189413	Glyma.07G199800/Glyma.13G176600/Glyma.05G197000/Glyma.15G088100	4
BP	GO:0006816	calcium ion transport	3/351	37/16967	0.193074	Glyma.11G202000/Glyma.02G238500/Glyma.16G142100	3
BP	GO:0009627	systemic acquired resistance	3/351	37/16967	0.193074	Glyma.02G009500/Glyma.10G010100/Glyma.18G191600	3
BP	GO:0009231	riboflavin biosynthetic process	2/351	17/16967	0.222833	Glyma.15G055700/Glyma.08G177300	2
BP	GO:0032787	monocarboxylic acid metabolic process	14/351	411/16967	0.222833	Glyma.07G196800/Glyma.04G149300/Glyma.07G071300/Glyma.03G232500/Glyma.13G109800/Glyma.11G198300/Glyma.13G030300/Glyma.15G026500/Glyma.18G280900/Glyma.10G148700/Glyma.13G347800/Glyma.19G229400/Glyma.08G256600/Glyma.09G218600	14
BP	GO:0006040	amino sugar metabolic process	3/351	40/16967	0.230121	Glyma.15G206800/Glyma.19G245400/Glyma.02G007400	3
BP	GO:0006771	riboflavin metabolic process	2/351	18/16967	0.232388	Glyma.15G055700/Glyma.08G177300	2
BP	GO:0009555	pollen development	2/351	18/16967	0.232388	Glyma.12G073000/Glyma.U021800	2
BP	GO:0048438	floral whorl development	2/351	18/16967	0.232388	Glyma.12G073000/Glyma.U021800	2
BP	GO:1902969	mitotic DNA replication	2/351	18/16967	0.232388	Glyma.01G187400/Glyma.18G027600	2
BP	GO:0006874	cellular calcium ion homeostasis	3/351	41/16967	0.232388	Glyma.11G202000/Glyma.02G238500/Glyma.16G142100	3
BP	GO:0030198	extracellular matrix organization	3/351	41/16967	0.232388	Glyma.18G271900/Glyma.01G036900/Glyma.19G033500	3
BP	GO:0043062	extracellular structure organization	3/351	41/16967	0.232388	Glyma.18G271900/Glyma.01G036900/Glyma.19G033500	3
BP	GO:0055074	calcium ion homeostasis	3/351	41/16967	0.232388	Glyma.11G202000/Glyma.02G238500/Glyma.16G142100	3
BP	GO:0034637	cellular carbohydrate biosynthetic process	9/351	233/16967	0.23653	Glyma.08G137500/Glyma.08G104600/Glyma.07G215600/Glyma.18G271900/Glyma.19G033500/Glyma.07G266200/Glyma.06G318400/Glyma.12G042400/Glyma.10G041400	9
BP	GO:0005992	trehalose biosynthetic process	2/351	19/16967	0.248424	Glyma.08G137500/Glyma.06G318400	2
BP	GO:0016036	cellular response to phosphate starvation	2/351	19/16967	0.248424	Glyma.18G261900/Glyma.09G235200	2
BP	GO:0051643	endoplasmic reticulum localization	2/351	19/16967	0.248424	Glyma.07G189400/Glyma.15G067100	2
BP	GO:0061817	endoplasmic reticulum-plasma membrane tethering	2/351	19/16967	0.248424	Glyma.07G189400/Glyma.15G067100	2
BP	GO:0009063	cellular amino acid catabolic process	5/351	101/16967	0.248718	Glyma.02G255400/Glyma.02G072200/Glyma.04G007700/Glyma.05G136100/Glyma.16G153400	5
BP	GO:0072503	cellular divalent inorganic cation homeostasis	3/351	43/16967	0.248718	Glyma.11G202000/Glyma.02G238500/Glyma.16G142100	3
BP	GO:0072507	divalent inorganic cation homeostasis	3/351	43/16967	0.248718	Glyma.11G202000/Glyma.02G238500/Glyma.16G142100	3
BP	GO:0006766	vitamin metabolic process	5/351	103/16967	0.256789	Glyma.19G210300/Glyma.17G066500/Glyma.15G055700/Glyma.08G177300/Glyma.09G236500	5
BP	GO:0005991	trehalose metabolic process	2/351	20/16967	0.256789	Glyma.08G137500/Glyma.06G318400	2
BP	GO:0009310	amine catabolic process	2/351	20/16967	0.256789	Glyma.02G255400/Glyma.10G090700	2
BP	GO:0042402	cellular biogenic amine catabolic process	2/351	20/16967	0.256789	Glyma.02G255400/Glyma.10G090700	2
BP	GO:0042435	indole-containing compound biosynthetic process	2/351	20/16967	0.256789	Glyma.12G073000/Glyma.U021800	2
BP	GO:0042726	flavin-containing compound metabolic process	2/351	20/16967	0.256789	Glyma.15G055700/Glyma.08G177300	2
BP	GO:0042727	flavin-containing compound biosynthetic process	2/351	20/16967	0.256789	Glyma.15G055700/Glyma.08G177300	2
BP	GO:0043666	regulation of phosphoprotein phosphatase activity	3/351	45/16967	0.264911	Glyma.09G040600/Glyma.17G030400/Glyma.15G145900	3
BP	GO:0006812	cation transport	9/351	245/16967	0.264911	Glyma.13G338300/Glyma.08G164400/Glyma.11G202000/Glyma.15G262800/Glyma.08G091900/Glyma.02G238500/Glyma.13G004400/Glyma.16G142100/Glyma.18G060300	9
BP	GO:0006772	thiamine metabolic process	2/351	21/16967	0.264911	Glyma.19G210300/Glyma.17G066500	2
BP	GO:0009414	response to water deprivation	2/351	21/16967	0.264911	Glyma.12G073000/Glyma.U021800	2
BP	GO:0009648	photoperiodism	2/351	21/16967	0.264911	Glyma.07G013500/Glyma.08G197500	2
BP	GO:0010215	cellulose microfibril organization	2/351	21/16967	0.264911	Glyma.18G271900/Glyma.19G033500	2
BP	GO:0042723	thiamine-containing compound metabolic process	2/351	21/16967	0.264911	Glyma.19G210300/Glyma.17G066500	2
BP	GO:0042724	thiamine-containing compound biosynthetic process	2/351	21/16967	0.264911	Glyma.19G210300/Glyma.17G066500	2
BP	GO:0070726	cell wall assembly	2/351	21/16967	0.264911	Glyma.18G271900/Glyma.19G033500	2
BP	GO:0071668	plant-type cell wall assembly	2/351	21/16967	0.264911	Glyma.18G271900/Glyma.19G033500	2
BP	GO:0042364	water-soluble vitamin biosynthetic process	4/351	75/16967	0.265871	Glyma.19G210300/Glyma.17G066500/Glyma.15G055700/Glyma.08G177300	4
BP	GO:0009832	plant-type cell wall biogenesis	6/351	141/16967	0.275899	Glyma.08G104600/Glyma.07G215600/Glyma.18G271900/Glyma.19G033500/Glyma.08G249900/Glyma.05G161900	6
BP	GO:0007163	establishment or maintenance of cell polarity	2/351	22/16967	0.279404	Glyma.06G319500/Glyma.13G087500	2
BP	GO:0009411	response to UV	2/351	22/16967	0.279404	Glyma.12G073000/Glyma.U021800	2
BP	GO:0009415	response to water	2/351	22/16967	0.279404	Glyma.12G073000/Glyma.U021800	2
BP	GO:0070592	cell wall polysaccharide biosynthetic process	4/351	77/16967	0.279404	Glyma.08G104600/Glyma.07G215600/Glyma.18G271900/Glyma.19G033500	4
BP	GO:0010921	regulation of phosphatase activity	3/351	48/16967	0.281837	Glyma.09G040600/Glyma.17G030400/Glyma.15G145900	3
BP	GO:0009308	amine metabolic process	6/351	143/16967	0.281837	Glyma.02G198300/Glyma.02G255400/Glyma.04G007700/Glyma.10G090700/Glyma.09G225400/Glyma.13G104700	6
BP	GO:0009064	glutamine family amino acid metabolic process	5/351	112/16967	0.298972	Glyma.02G072200/Glyma.04G007700/Glyma.19G002400/Glyma.05G136100/Glyma.16G153400	5
BP	GO:0044038	cell wall macromolecule biosynthetic process	4/351	80/16967	0.298972	Glyma.08G104600/Glyma.07G215600/Glyma.18G271900/Glyma.19G033500	4
BP	GO:0070589	cellular component macromolecule biosynthetic process	4/351	80/16967	0.298972	Glyma.08G104600/Glyma.07G215600/Glyma.18G271900/Glyma.19G033500	4
BP	GO:1901617	organic hydroxy compound biosynthetic process	7/351	182/16967	0.298972	Glyma.16G113000/Glyma.17G066500/Glyma.07G266200/Glyma.03G232500/Glyma.10G148700/Glyma.19G229400/Glyma.09G196000	7
BP	GO:0046395	carboxylic acid catabolic process	6/351	148/16967	0.298972	Glyma.02G255400/Glyma.02G072200/Glyma.04G007700/Glyma.07G071300/Glyma.05G136100/Glyma.16G153400	6
BP	GO:0001101	response to acid chemical	2/351	24/16967	0.298972	Glyma.12G073000/Glyma.U021800	2
BP	GO:0002682	regulation of immune system process	2/351	24/16967	0.298972	Glyma.02G009500/Glyma.10G010100	2
BP	GO:0002831	regulation of response to biotic stimulus	2/351	24/16967	0.298972	Glyma.02G009500/Glyma.10G010100	2
BP	GO:0010200	response to chitin	2/351	24/16967	0.298972	Glyma.12G073000/Glyma.U021800	2
BP	GO:0032101	regulation of response to external stimulus	2/351	24/16967	0.298972	Glyma.02G009500/Glyma.10G010100	2
BP	GO:0048229	gametophyte development	2/351	24/16967	0.298972	Glyma.12G073000/Glyma.U021800	2
BP	GO:0048437	floral organ development	2/351	24/16967	0.298972	Glyma.12G073000/Glyma.U021800	2
BP	GO:0050776	regulation of immune response	2/351	24/16967	0.298972	Glyma.02G009500/Glyma.10G010100	2
BP	GO:0090158	endoplasmic reticulum membrane organization	2/351	24/16967	0.298972	Glyma.07G189400/Glyma.15G067100	2
BP	GO:0015936	coenzyme A metabolic process	2/351	26/16967	0.341149	Glyma.16G113000/Glyma.09G196000	2
BP	GO:0006575	cellular modified amino acid metabolic process	6/351	154/16967	0.341149	Glyma.11G235800/Glyma.08G174700/Glyma.04G077300/Glyma.08G118700/Glyma.01G106000/Glyma.03G176300	6
BP	GO:0009690	cytokinin metabolic process	3/351	55/16967	0.354425	Glyma.02G198300/Glyma.09G225400/Glyma.13G104700	3
BP	GO:0045332	phospholipid translocation	2/351	27/16967	0.356779	Glyma.17G123800/Glyma.05G015400	2
BP	GO:0045927	positive regulation of growth	2/351	27/16967	0.356779	Glyma.06G024000/Glyma.04G023800	2
BP	GO:0034754	cellular hormone metabolic process	3/351	56/16967	0.362243	Glyma.02G198300/Glyma.09G225400/Glyma.13G104700	3
BP	GO:0009875	pollen-pistil interaction	4/351	88/16967	0.362243	Glyma.12G073000/Glyma.16G093900/Glyma.07G188800/Glyma.U021800	4
BP	GO:1901657	glycosyl compound metabolic process	4/351	89/16967	0.370021	Glyma.11G129900/Glyma.12G054100/Glyma.12G054200/Glyma.12G053900	4
BP	GO:1990542	mitochondrial transmembrane transport	4/351	89/16967	0.370021	Glyma.11G202000/Glyma.02G238500/Glyma.16G142100/Glyma.07G144200	4
BP	GO:0006631	fatty acid metabolic process	7/351	197/16967	0.376081	Glyma.07G196800/Glyma.04G149300/Glyma.07G071300/Glyma.11G198300/Glyma.13G030300/Glyma.15G026500/Glyma.13G347800	7
BP	GO:0006767	water-soluble vitamin metabolic process	4/351	90/16967	0.377805	Glyma.19G210300/Glyma.17G066500/Glyma.15G055700/Glyma.08G177300	4
BP	GO:0016054	organic acid catabolic process	6/351	161/16967	0.379071	Glyma.02G255400/Glyma.02G072200/Glyma.04G007700/Glyma.07G071300/Glyma.05G136100/Glyma.16G153400	6
BP	GO:0046394	carboxylic acid biosynthetic process	14/351	475/16967	0.379071	Glyma.07G196800/Glyma.04G149300/Glyma.03G232500/Glyma.13G109800/Glyma.13G030300/Glyma.11G233900/Glyma.18G023100/Glyma.15G026500/Glyma.18G280900/Glyma.10G148700/Glyma.13G347800/Glyma.19G229400/Glyma.08G256600/Glyma.10G172700	14
BP	GO:0035304	regulation of protein dephosphorylation	3/351	58/16967	0.379131	Glyma.09G040600/Glyma.17G030400/Glyma.15G145900	3
BP	GO:0006811	ion transport	12/351	395/16967	0.380409	Glyma.13G338300/Glyma.08G164400/Glyma.11G202000/Glyma.15G262800/Glyma.18G261900/Glyma.08G091900/Glyma.02G238500/Glyma.15G115200/Glyma.13G004400/Glyma.16G142100/Glyma.18G060300/Glyma.09G235200	12
BP	GO:0034204	lipid translocation	2/351	29/16967	0.380409	Glyma.17G123800/Glyma.05G015400	2
BP	GO:0034308	primary alcohol metabolic process	2/351	29/16967	0.380409	Glyma.19G210300/Glyma.17G066500	2
BP	GO:0010228	vegetative to reproductive phase transition of meristem	2/351	30/16967	0.398697	Glyma.07G013500/Glyma.08G197500	2
BP	GO:0015914	phospholipid transport	2/351	30/16967	0.398697	Glyma.17G123800/Glyma.05G015400	2
BP	GO:0006869	lipid transport	5/351	130/16967	0.413913	Glyma.08G074100/Glyma.17G123800/Glyma.05G015400/Glyma.09G181100/Glyma.12G028200	5
BP	GO:0097237	cellular response to toxic substance	2/351	31/16967	0.415126	Glyma.14G121200/Glyma.14G188300	2
BP	GO:1990748	cellular detoxification	2/351	31/16967	0.415126	Glyma.14G121200/Glyma.14G188300	2
BP	GO:0016051	carbohydrate biosynthetic process	10/351	326/16967	0.422286	Glyma.08G137500/Glyma.08G104600/Glyma.07G215600/Glyma.18G271900/Glyma.19G033500/Glyma.07G266200/Glyma.06G318400/Glyma.12G042400/Glyma.18G224200/Glyma.10G041400	10
BP	GO:0010118	stomatal movement	2/351	32/16967	0.422286	Glyma.11G192900/Glyma.13G186600	2
BP	GO:0010119	regulation of stomatal movement	2/351	32/16967	0.422286	Glyma.11G192900/Glyma.13G186600	2
BP	GO:0033260	nuclear DNA replication	2/351	32/16967	0.422286	Glyma.01G187400/Glyma.18G027600	2
BP	GO:0048584	positive regulation of response to stimulus	2/351	32/16967	0.422286	Glyma.12G073000/Glyma.U021800	2
BP	GO:0051017	actin filament bundle assembly	2/351	32/16967	0.422286	Glyma.06G319500/Glyma.13G087500	2
BP	GO:0061572	actin filament bundle organization	2/351	32/16967	0.422286	Glyma.06G319500/Glyma.13G087500	2
BP	GO:0097035	regulation of membrane lipid distribution	2/351	32/16967	0.422286	Glyma.17G123800/Glyma.05G015400	2
BP	GO:1901605	alpha-amino acid metabolic process	9/351	288/16967	0.429747	Glyma.02G255400/Glyma.02G072200/Glyma.04G007700/Glyma.19G002400/Glyma.11G233900/Glyma.18G023100/Glyma.05G136100/Glyma.16G153400/Glyma.10G172700	9
BP	GO:0044282	small molecule catabolic process	8/351	249/16967	0.432335	Glyma.02G255400/Glyma.02G072200/Glyma.04G007700/Glyma.07G266200/Glyma.07G071300/Glyma.05G136100/Glyma.16G153400/Glyma.14G121200	8
BP	GO:0080135	regulation of cellular response to stress	2/351	33/16967	0.436328	Glyma.12G073000/Glyma.U021800	2
BP	GO:0098754	detoxification	2/351	33/16967	0.436328	Glyma.14G121200/Glyma.14G188300	2
BP	GO:0016053	organic acid biosynthetic process	14/351	496/16967	0.438274	Glyma.07G196800/Glyma.04G149300/Glyma.03G232500/Glyma.13G109800/Glyma.13G030300/Glyma.11G233900/Glyma.18G023100/Glyma.15G026500/Glyma.18G280900/Glyma.10G148700/Glyma.13G347800/Glyma.19G229400/Glyma.08G256600/Glyma.10G172700	14
BP	GO:0009072	aromatic amino acid family metabolic process	3/351	65/16967	0.439175	Glyma.02G255400/Glyma.11G233900/Glyma.18G023100	3
BP	GO:0035303	regulation of dephosphorylation	3/351	65/16967	0.439175	Glyma.09G040600/Glyma.17G030400/Glyma.15G145900	3
BP	GO:0006865	amino acid transport	5/351	138/16967	0.457395	Glyma.04G209200/Glyma.06G019500/Glyma.09G238100/Glyma.01G161100/Glyma.06G088300	5
BP	GO:0009834	plant-type secondary cell wall biogenesis	3/351	67/16967	0.464158	Glyma.08G104600/Glyma.07G215600/Glyma.05G161900	3
BP	GO:0046351	disaccharide biosynthetic process	2/351	35/16967	0.467405	Glyma.08G137500/Glyma.06G318400	2
BP	GO:0009409	response to cold	2/351	36/16967	0.48592	Glyma.12G073000/Glyma.U021800	2
BP	GO:1901615	organic hydroxy compound metabolic process	9/351	300/16967	0.48592	Glyma.16G113000/Glyma.19G210300/Glyma.17G066500/Glyma.07G266200/Glyma.03G232500/Glyma.10G148700/Glyma.19G229400/Glyma.09G218600/Glyma.09G196000	9
BP	GO:0010876	lipid localization	5/351	142/16967	0.486443	Glyma.08G074100/Glyma.17G123800/Glyma.05G015400/Glyma.09G181100/Glyma.12G028200	5
BP	GO:0006270	DNA replication initiation	2/351	37/16967	0.489589	Glyma.01G187400/Glyma.18G027600	2
BP	GO:0006817	phosphate ion transport	2/351	37/16967	0.489589	Glyma.18G261900/Glyma.09G235200	2
BP	GO:0006004	fucose metabolic process	3/351	71/16967	0.489589	Glyma.01G109800/Glyma.17G049700/Glyma.09G003300	3
BP	GO:0019953	sexual reproduction	2/351	38/16967	0.489589	Glyma.12G022800/Glyma.11G096700	2
BP	GO:0044703	multi-organism reproductive process	2/351	38/16967	0.489589	Glyma.12G022800/Glyma.11G096700	2
BP	GO:0009628	response to abiotic stimulus	12/351	433/16967	0.489589	Glyma.12G073000/Glyma.11G129900/Glyma.07G013500/Glyma.15G179400/Glyma.10G072000/Glyma.08G197500/Glyma.13G151200/Glyma.12G054100/Glyma.12G054200/Glyma.12G053900/Glyma.U021800/Glyma.04G108500	12
BP	GO:0006787	porphyrin-containing compound catabolic process	1/351	10/16967	0.489589	Glyma.07G097000	1
BP	GO:0007205	protein kinase C-activating G protein-coupled receptor signaling pathway	1/351	10/16967	0.489589	Glyma.06G254900	1
BP	GO:0008216	spermidine metabolic process	1/351	10/16967	0.489589	Glyma.04G007700	1
BP	GO:0008295	spermidine biosynthetic process	1/351	10/16967	0.489589	Glyma.04G007700	1
BP	GO:0009445	putrescine metabolic process	1/351	10/16967	0.489589	Glyma.04G007700	1
BP	GO:0009446	putrescine biosynthetic process	1/351	10/16967	0.489589	Glyma.04G007700	1
BP	GO:0031056	regulation of histone modification	1/351	10/16967	0.489589	Glyma.13G362500	1
BP	GO:0033015	tetrapyrrole catabolic process	1/351	10/16967	0.489589	Glyma.07G097000	1
BP	GO:0042371	vitamin K biosynthetic process	1/351	10/16967	0.489589	Glyma.09G236500	1
BP	GO:0042372	phylloquinone biosynthetic process	1/351	10/16967	0.489589	Glyma.09G236500	1
BP	GO:0042373	vitamin K metabolic process	1/351	10/16967	0.489589	Glyma.09G236500	1
BP	GO:0042374	phylloquinone metabolic process	1/351	10/16967	0.489589	Glyma.09G236500	1
BP	GO:0052863	1-deoxy-D-xylulose 5-phosphate metabolic process	1/351	10/16967	0.489589	Glyma.17G066500	1
BP	GO:0052865	1-deoxy-D-xylulose 5-phosphate biosynthetic process	1/351	10/16967	0.489589	Glyma.17G066500	1
BP	GO:2000762	regulation of phenylpropanoid metabolic process	1/351	10/16967	0.489589	Glyma.05G155600	1
BP	GO:0003006	developmental process involved in reproduction	6/351	186/16967	0.489589	Glyma.12G073000/Glyma.07G013500/Glyma.08G197500/Glyma.02G136700/Glyma.07G208700/Glyma.U021800	6
BP	GO:0006633	fatty acid biosynthetic process	5/351	147/16967	0.489589	Glyma.07G196800/Glyma.04G149300/Glyma.13G030300/Glyma.15G026500/Glyma.13G347800	5
BP	GO:0000160	phosphorelay signal transduction system	4/351	109/16967	0.489589	Glyma.02G027400/Glyma.07G049400/Glyma.19G260400/Glyma.19G171400	4
BP	GO:0007029	endoplasmic reticulum organization	2/351	39/16967	0.496419	Glyma.07G189400/Glyma.15G067100	2
BP	GO:0000271	polysaccharide biosynthetic process	7/351	228/16967	0.499209	Glyma.08G104600/Glyma.07G215600/Glyma.18G271900/Glyma.19G033500/Glyma.12G042400/Glyma.18G224200/Glyma.10G041400	7
BP	GO:0055065	metal ion homeostasis	4/351	111/16967	0.505824	Glyma.07G171600/Glyma.11G202000/Glyma.02G238500/Glyma.16G142100	4
BP	GO:0044272	sulfur compound biosynthetic process	5/351	150/16967	0.509328	Glyma.12G073000/Glyma.19G210300/Glyma.17G066500/Glyma.10G172700/Glyma.U021800	5
BP	GO:0033692	cellular polysaccharide biosynthetic process	6/351	190/16967	0.510451	Glyma.08G104600/Glyma.07G215600/Glyma.18G271900/Glyma.19G033500/Glyma.12G042400/Glyma.10G041400	6
BP	GO:0042445	hormone metabolic process	4/351	112/16967	0.510451	Glyma.02G198300/Glyma.09G225400/Glyma.08G292000/Glyma.13G104700	4
BP	GO:0006576	cellular biogenic amine metabolic process	3/351	75/16967	0.510451	Glyma.02G255400/Glyma.04G007700/Glyma.10G090700	3
BP	GO:0006308	DNA catabolic process	1/351	11/16967	0.510451	Glyma.20G116800	1
BP	GO:0010051	xylem and phloem pattern formation	1/351	11/16967	0.510451	Glyma.10G244600	1
BP	GO:0036297	interstrand cross-link repair	1/351	11/16967	0.510451	Glyma.11G038500	1
BP	GO:0098869	cellular oxidant detoxification	1/351	11/16967	0.510451	Glyma.14G188300	1
BP	GO:0044106	cellular amine metabolic process	3/351	76/16967	0.515069	Glyma.02G255400/Glyma.04G007700/Glyma.10G090700	3
BP	GO:0002229	defense response to oomycetes	2/351	42/16967	0.529917	Glyma.18G185400/Glyma.07G183900	2
BP	GO:0002239	response to oomycetes	2/351	42/16967	0.529917	Glyma.18G185400/Glyma.07G183900	2
BP	GO:0006598	polyamine catabolic process	1/351	12/16967	0.536256	Glyma.10G090700	1
BP	GO:0006714	sesquiterpenoid metabolic process	1/351	12/16967	0.536256	Glyma.09G218600	1
BP	GO:0017157	regulation of exocytosis	1/351	12/16967	0.536256	Glyma.16G116200	1
BP	GO:0051046	regulation of secretion	1/351	12/16967	0.536256	Glyma.16G116200	1
BP	GO:1903530	regulation of secretion by cell	1/351	12/16967	0.536256	Glyma.16G116200	1
BP	GO:0006595	polyamine metabolic process	2/351	44/16967	0.55593	Glyma.04G007700/Glyma.10G090700	2
BP	GO:0006305	DNA alkylation	1/351	13/16967	0.56292	Glyma.13G362500	1
BP	GO:0006306	DNA methylation	1/351	13/16967	0.56292	Glyma.13G362500	1
BP	GO:0006775	fat-soluble vitamin metabolic process	1/351	13/16967	0.56292	Glyma.09G236500	1
BP	GO:0042362	fat-soluble vitamin biosynthetic process	1/351	13/16967	0.56292	Glyma.09G236500	1
BP	GO:0051307	meiotic chromosome separation	1/351	13/16967	0.56292	Glyma.11G038500	1
BP	GO:0016126	sterol biosynthetic process	2/351	45/16967	0.56292	Glyma.16G113000/Glyma.09G196000	2
BP	GO:0009073	aromatic amino acid family biosynthetic process	2/351	46/16967	0.579128	Glyma.11G233900/Glyma.18G023100	2
BP	GO:0022414	reproductive process	11/351	419/16967	0.587469	Glyma.12G073000/Glyma.07G013500/Glyma.16G093900/Glyma.11G038500/Glyma.08G197500/Glyma.07G188800/Glyma.12G022800/Glyma.02G136700/Glyma.07G208700/Glyma.11G096700/Glyma.U021800	11
BP	GO:0009092	homoserine metabolic process	1/351	14/16967	0.587469	Glyma.10G172700	1
BP	GO:0043455	regulation of secondary metabolic process	1/351	14/16967	0.587469	Glyma.05G155600	1
BP	GO:0009636	response to toxic substance	2/351	47/16967	0.587469	Glyma.14G121200/Glyma.14G188300	2
BP	GO:0019252	starch biosynthetic process	2/351	47/16967	0.587469	Glyma.12G042400/Glyma.10G041400	2
BP	GO:0009416	response to light stimulus	6/351	207/16967	0.595552	Glyma.12G073000/Glyma.07G013500/Glyma.15G179400/Glyma.10G072000/Glyma.08G197500/Glyma.U021800	6
BP	GO:0000003	reproduction	11/351	422/16967	0.595552	Glyma.12G073000/Glyma.07G013500/Glyma.16G093900/Glyma.11G038500/Glyma.08G197500/Glyma.07G188800/Glyma.12G022800/Glyma.02G136700/Glyma.07G208700/Glyma.11G096700/Glyma.U021800	11
BP	GO:0009312	oligosaccharide biosynthetic process	2/351	48/16967	0.595552	Glyma.08G137500/Glyma.06G318400	2
BP	GO:0044786	cell cycle DNA replication	2/351	48/16967	0.595552	Glyma.01G187400/Glyma.18G027600	2
BP	GO:0045492	xylan biosynthetic process	2/351	48/16967	0.595552	Glyma.08G104600/Glyma.07G215600	2
BP	GO:0009266	response to temperature stimulus	4/351	126/16967	0.599492	Glyma.12G073000/Glyma.13G151200/Glyma.U021800/Glyma.04G108500	4
BP	GO:0060236	regulation of mitotic spindle organization	1/351	15/16967	0.603272	Glyma.05G054600	1
BP	GO:0090224	regulation of spindle organization	1/351	15/16967	0.603272	Glyma.05G054600	1
BP	GO:0090307	mitotic spindle assembly	1/351	15/16967	0.603272	Glyma.05G054600	1
BP	GO:0120254	olefinic compound metabolic process	1/351	15/16967	0.603272	Glyma.09G218600	1
BP	GO:0051336	regulation of hydrolase activity	4/351	128/16967	0.608589	Glyma.09G040600/Glyma.17G030400/Glyma.01G119300/Glyma.15G145900	4
BP	GO:0022406	membrane docking	3/351	88/16967	0.608589	Glyma.02G195300/Glyma.07G189400/Glyma.15G067100	3
BP	GO:0140056	organelle localization by membrane tethering	3/351	88/16967	0.608589	Glyma.02G195300/Glyma.07G189400/Glyma.15G067100	3
BP	GO:0009251	glucan catabolic process	2/351	50/16967	0.612877	Glyma.10G106600/Glyma.02G293900	2
BP	GO:0045934	negative regulation of nucleobase-containing compound metabolic process	4/351	129/16967	0.613017	Glyma.17G079000/Glyma.13G362500/Glyma.01G131900/Glyma.05G020400	4
BP	GO:0006887	exocytosis	3/351	89/16967	0.615293	Glyma.02G195300/Glyma.02G232000/Glyma.16G116200	3
BP	GO:0048015	phosphatidylinositol-mediated signaling	1/351	16/16967	0.618308	Glyma.18G027300	1
BP	GO:0090332	stomatal closure	1/351	16/16967	0.618308	Glyma.13G186600	1
BP	GO:0090333	regulation of stomatal closure	1/351	16/16967	0.618308	Glyma.13G186600	1
BP	GO:0009267	cellular response to starvation	2/351	51/16967	0.618308	Glyma.18G261900/Glyma.09G235200	2
BP	GO:0005982	starch metabolic process	2/351	52/16967	0.6304	Glyma.12G042400/Glyma.10G041400	2
BP	GO:0009314	response to radiation	6/351	217/16967	0.6304	Glyma.12G073000/Glyma.07G013500/Glyma.15G179400/Glyma.10G072000/Glyma.08G197500/Glyma.U021800	6
BP	GO:0030243	cellulose metabolic process	3/351	92/16967	0.6304	Glyma.18G271900/Glyma.02G293900/Glyma.19G033500	3
BP	GO:0005978	glycogen biosynthetic process	1/351	17/16967	0.6304	Glyma.12G042400	1
BP	GO:0009074	aromatic amino acid family catabolic process	1/351	17/16967	0.6304	Glyma.02G255400	1
BP	GO:0046292	formaldehyde metabolic process	1/351	17/16967	0.6304	Glyma.14G121200	1
BP	GO:0046294	formaldehyde catabolic process	1/351	17/16967	0.6304	Glyma.14G121200	1
BP	GO:0110095	cellular detoxification of aldehyde	1/351	17/16967	0.6304	Glyma.14G121200	1
BP	GO:0110096	cellular response to aldehyde	1/351	17/16967	0.6304	Glyma.14G121200	1
BP	GO:0031669	cellular response to nutrient levels	2/351	53/16967	0.6304	Glyma.18G261900/Glyma.09G235200	2
BP	GO:0048827	phyllome development	2/351	53/16967	0.6304	Glyma.12G073000/Glyma.U021800	2
BP	GO:0016125	sterol metabolic process	3/351	93/16967	0.633511	Glyma.16G113000/Glyma.09G218600/Glyma.09G196000	3
BP	GO:0009250	glucan biosynthetic process	4/351	135/16967	0.638571	Glyma.18G271900/Glyma.19G033500/Glyma.12G042400/Glyma.10G041400	4
BP	GO:0006875	cellular metal ion homeostasis	3/351	94/16967	0.640212	Glyma.11G202000/Glyma.02G238500/Glyma.16G142100	3
BP	GO:0009637	response to blue light	1/351	18/16967	0.640212	Glyma.10G072000	1
BP	GO:0046855	inositol phosphate dephosphorylation	1/351	18/16967	0.640212	Glyma.07G266200	1
BP	GO:0070973	protein localization to endoplasmic reticulum exit site	1/351	18/16967	0.640212	Glyma.12G192600	1
BP	GO:0071545	inositol phosphate catabolic process	1/351	18/16967	0.640212	Glyma.07G266200	1
BP	GO:0033865	nucleoside bisphosphate metabolic process	3/351	95/16967	0.640212	Glyma.16G113000/Glyma.07G071300/Glyma.09G196000	3
BP	GO:0033875	ribonucleoside bisphosphate metabolic process	3/351	95/16967	0.640212	Glyma.16G113000/Glyma.07G071300/Glyma.09G196000	3
BP	GO:0034032	purine nucleoside bisphosphate metabolic process	3/351	95/16967	0.640212	Glyma.16G113000/Glyma.07G071300/Glyma.09G196000	3
BP	GO:0006470	protein dephosphorylation	4/351	138/16967	0.650589	Glyma.15G201300/Glyma.09G040600/Glyma.17G030400/Glyma.15G145900	4
BP	GO:0003002	regionalization	1/351	19/16967	0.654012	Glyma.10G244600	1
BP	GO:0006271	DNA strand elongation involved in DNA replication	1/351	19/16967	0.654012	Glyma.01G187400	1
BP	GO:0006782	protoporphyrinogen IX biosynthetic process	1/351	19/16967	0.654012	Glyma.08G064700	1
BP	GO:0022616	DNA strand elongation	1/351	19/16967	0.654012	Glyma.01G187400	1
BP	GO:0046501	protoporphyrinogen IX metabolic process	1/351	19/16967	0.654012	Glyma.08G064700	1
BP	GO:0046513	ceramide biosynthetic process	1/351	19/16967	0.654012	Glyma.18G192800	1
BP	GO:0048017	inositol lipid-mediated signaling	1/351	19/16967	0.654012	Glyma.18G027300	1
BP	GO:0042594	response to starvation	2/351	57/16967	0.657487	Glyma.18G261900/Glyma.09G235200	2
BP	GO:0015849	organic acid transport	5/351	184/16967	0.659957	Glyma.04G209200/Glyma.06G019500/Glyma.09G238100/Glyma.01G161100/Glyma.06G088300	5
BP	GO:0015748	organophosphate ester transport	2/351	58/16967	0.660043	Glyma.17G123800/Glyma.05G015400	2
BP	GO:0031668	cellular response to extracellular stimulus	2/351	58/16967	0.660043	Glyma.18G261900/Glyma.09G235200	2
BP	GO:0071496	cellular response to external stimulus	2/351	58/16967	0.660043	Glyma.18G261900/Glyma.09G235200	2
BP	GO:0009228	thiamine biosynthetic process	1/351	20/16967	0.660043	Glyma.17G066500	1
BP	GO:0009768	photosynthesis, light harvesting in photosystem I	1/351	20/16967	0.660043	Glyma.15G179400	1
BP	GO:0019432	triglyceride biosynthetic process	1/351	20/16967	0.660043	Glyma.09G196400	1
BP	GO:0030574	collagen catabolic process	1/351	20/16967	0.660043	Glyma.01G036900	1
BP	GO:0046460	neutral lipid biosynthetic process	1/351	20/16967	0.660043	Glyma.09G196400	1
BP	GO:0046463	acylglycerol biosynthetic process	1/351	20/16967	0.660043	Glyma.09G196400	1
BP	GO:0032940	secretion by cell	3/351	100/16967	0.660043	Glyma.02G195300/Glyma.02G232000/Glyma.16G116200	3
BP	GO:0006839	mitochondrial transport	4/351	143/16967	0.660388	Glyma.11G202000/Glyma.02G238500/Glyma.16G142100/Glyma.07G144200	4
BP	GO:0032963	collagen metabolic process	1/351	21/16967	0.672941	Glyma.01G036900	1
BP	GO:0044728	DNA methylation or demethylation	1/351	21/16967	0.672941	Glyma.13G362500	1
BP	GO:0046470	phosphatidylcholine metabolic process	1/351	21/16967	0.672941	Glyma.01G215100	1
BP	GO:0046838	phosphorylated carbohydrate dephosphorylation	1/351	21/16967	0.672941	Glyma.07G266200	1
BP	GO:0051053	negative regulation of DNA metabolic process	1/351	21/16967	0.672941	Glyma.13G362500	1
BP	GO:0071482	cellular response to light stimulus	1/351	21/16967	0.672941	Glyma.10G072000	1
BP	GO:0006720	isoprenoid metabolic process	4/351	146/16967	0.674699	Glyma.16G113000/Glyma.17G066500/Glyma.09G218600/Glyma.09G196000	4
BP	GO:0031667	response to nutrient levels	2/351	61/16967	0.676507	Glyma.18G261900/Glyma.09G235200	2
BP	GO:0006066	alcohol metabolic process	4/351	147/16967	0.676507	Glyma.19G210300/Glyma.17G066500/Glyma.07G266200/Glyma.09G218600	4
BP	GO:0010817	regulation of hormone levels	4/351	147/16967	0.676507	Glyma.02G198300/Glyma.09G225400/Glyma.08G292000/Glyma.13G104700	4
BP	GO:0045892	negative regulation of transcription, DNA-templated	3/351	104/16967	0.676507	Glyma.17G079000/Glyma.01G131900/Glyma.05G020400	3
BP	GO:1902679	negative regulation of RNA biosynthetic process	3/351	104/16967	0.676507	Glyma.17G079000/Glyma.01G131900/Glyma.05G020400	3
BP	GO:1903507	negative regulation of nucleic acid-templated transcription	3/351	104/16967	0.676507	Glyma.17G079000/Glyma.01G131900/Glyma.05G020400	3
BP	GO:0006304	DNA modification	1/351	22/16967	0.676507	Glyma.13G362500	1
BP	GO:0006638	neutral lipid metabolic process	1/351	22/16967	0.676507	Glyma.09G196400	1
BP	GO:0006639	acylglycerol metabolic process	1/351	22/16967	0.676507	Glyma.09G196400	1
BP	GO:0006641	triglyceride metabolic process	1/351	22/16967	0.676507	Glyma.09G196400	1
BP	GO:0034968	histone lysine methylation	1/351	22/16967	0.676507	Glyma.13G362500	1
BP	GO:0030244	cellulose biosynthetic process	2/351	63/16967	0.680925	Glyma.18G271900/Glyma.19G033500	2
BP	GO:0045491	xylan metabolic process	2/351	63/16967	0.680925	Glyma.08G104600/Glyma.07G215600	2
BP	GO:2000241	regulation of reproductive process	2/351	63/16967	0.680925	Glyma.07G013500/Glyma.08G197500	2
BP	GO:0046903	secretion	3/351	106/16967	0.680925	Glyma.02G195300/Glyma.02G232000/Glyma.16G116200	3
BP	GO:0051273	beta-glucan metabolic process	3/351	106/16967	0.680925	Glyma.18G271900/Glyma.02G293900/Glyma.19G033500	3
BP	GO:0006857	oligopeptide transport	1/351	23/16967	0.683108	Glyma.15G017000	1
BP	GO:0007389	pattern specification process	1/351	23/16967	0.683108	Glyma.10G244600	1
BP	GO:0015833	peptide transport	1/351	23/16967	0.683108	Glyma.15G017000	1
BP	GO:0050801	ion homeostasis	5/351	196/16967	0.683108	Glyma.07G171600/Glyma.11G202000/Glyma.02G238500/Glyma.16G142100/Glyma.04G069500	5
BP	GO:0015698	inorganic anion transport	2/351	64/16967	0.683108	Glyma.18G261900/Glyma.09G235200	2
BP	GO:0048511	rhythmic process	2/351	64/16967	0.683108	Glyma.07G049400/Glyma.19G260400	2
BP	GO:0051253	negative regulation of RNA metabolic process	3/351	108/16967	0.688929	Glyma.17G079000/Glyma.01G131900/Glyma.05G020400	3
BP	GO:0006568	tryptophan metabolic process	1/351	24/16967	0.691716	Glyma.02G255400	1
BP	GO:0006586	indolalkylamine metabolic process	1/351	24/16967	0.691716	Glyma.02G255400	1
BP	GO:0034309	primary alcohol biosynthetic process	1/351	24/16967	0.691716	Glyma.17G066500	1
BP	GO:0071214	cellular response to abiotic stimulus	1/351	24/16967	0.691716	Glyma.10G072000	1
BP	GO:0071478	cellular response to radiation	1/351	24/16967	0.691716	Glyma.10G072000	1
BP	GO:0104004	cellular response to environmental stimulus	1/351	24/16967	0.691716	Glyma.10G072000	1
BP	GO:0009991	response to extracellular stimulus	2/351	66/16967	0.693149	Glyma.18G261900/Glyma.09G235200	2
BP	GO:0034440	lipid oxidation	2/351	66/16967	0.693149	Glyma.07G196800/Glyma.13G030300	2
BP	GO:0043648	dicarboxylic acid metabolic process	3/351	110/16967	0.693149	Glyma.02G072200/Glyma.05G136100/Glyma.16G153400	3
BP	GO:0016042	lipid catabolic process	4/351	155/16967	0.693419	Glyma.07G071300/Glyma.18G027300/Glyma.01G215100/Glyma.18G040500	4
BP	GO:0008202	steroid metabolic process	3/351	111/16967	0.699404	Glyma.16G113000/Glyma.09G218600/Glyma.09G196000	3
BP	GO:0046185	aldehyde catabolic process	1/351	25/16967	0.701536	Glyma.14G121200	1
BP	GO:0070507	regulation of microtubule cytoskeleton organization	1/351	25/16967	0.701536	Glyma.05G054600	1
BP	GO:0005984	disaccharide metabolic process	2/351	69/16967	0.712293	Glyma.08G137500/Glyma.06G318400	2
BP	GO:0005977	glycogen metabolic process	1/351	26/16967	0.712293	Glyma.12G042400	1
BP	GO:0006012	galactose metabolic process	1/351	26/16967	0.712293	Glyma.10G145300	1
BP	GO:0006020	inositol metabolic process	1/351	26/16967	0.712293	Glyma.07G266200	1
BP	GO:0006112	energy reserve metabolic process	1/351	26/16967	0.712293	Glyma.12G042400	1
BP	GO:0060627	regulation of vesicle-mediated transport	1/351	26/16967	0.712293	Glyma.16G116200	1
BP	GO:0009395	phospholipid catabolic process	1/351	27/16967	0.71892	Glyma.01G215100	1
BP	GO:0009850	auxin metabolic process	1/351	27/16967	0.71892	Glyma.08G292000	1
BP	GO:0009968	negative regulation of signal transduction	1/351	27/16967	0.71892	Glyma.05G155600	1
BP	GO:0010648	negative regulation of cell communication	1/351	27/16967	0.71892	Glyma.05G155600	1
BP	GO:0016998	cell wall macromolecule catabolic process	1/351	27/16967	0.71892	Glyma.02G007400	1
BP	GO:0019344	cysteine biosynthetic process	1/351	27/16967	0.71892	Glyma.10G172700	1
BP	GO:0023057	negative regulation of signaling	1/351	27/16967	0.71892	Glyma.05G155600	1
BP	GO:0046174	polyol catabolic process	1/351	27/16967	0.71892	Glyma.07G266200	1
BP	GO:0031399	regulation of protein modification process	4/351	164/16967	0.729953	Glyma.09G040600/Glyma.17G030400/Glyma.13G362500/Glyma.15G145900	4
BP	GO:0006002	fructose 6-phosphate metabolic process	1/351	28/16967	0.729953	Glyma.08G199800	1
BP	GO:0016571	histone methylation	1/351	28/16967	0.729953	Glyma.13G362500	1
BP	GO:0046164	alcohol catabolic process	1/351	28/16967	0.729953	Glyma.07G266200	1
BP	GO:0046854	phosphatidylinositol phosphate biosynthetic process	1/351	28/16967	0.729953	Glyma.07G266200	1
BP	GO:0040008	regulation of growth	2/351	73/16967	0.735441	Glyma.06G024000/Glyma.04G023800	2
BP	GO:0072528	pyrimidine-containing compound biosynthetic process	2/351	74/16967	0.738639	Glyma.19G210300/Glyma.17G066500	2
BP	GO:0009767	photosynthetic electron transport chain	1/351	29/16967	0.738639	Glyma.12G215100	1
BP	GO:0030245	cellulose catabolic process	1/351	29/16967	0.738639	Glyma.02G293900	1
BP	GO:0032886	regulation of microtubule-based process	1/351	29/16967	0.738639	Glyma.05G054600	1
BP	GO:0051275	beta-glucan catabolic process	1/351	29/16967	0.738639	Glyma.02G293900	1
BP	GO:0008299	isoprenoid biosynthetic process	3/351	121/16967	0.743302	Glyma.16G113000/Glyma.17G066500/Glyma.09G196000	3
BP	GO:0006525	arginine metabolic process	1/351	30/16967	0.748401	Glyma.04G007700	1
BP	GO:0008283	cell population proliferation	1/351	30/16967	0.748401	Glyma.U029600	1
BP	GO:0042886	amide transport	1/351	30/16967	0.748401	Glyma.15G017000	1
BP	GO:1901616	organic hydroxy compound catabolic process	1/351	30/16967	0.748401	Glyma.07G266200	1
BP	GO:0006778	porphyrin-containing compound metabolic process	2/351	76/16967	0.749072	Glyma.08G064700/Glyma.07G097000	2
BP	GO:0048608	reproductive structure development	4/351	170/16967	0.749072	Glyma.12G073000/Glyma.07G013500/Glyma.08G197500/Glyma.U021800	4
BP	GO:0061458	reproductive system development	4/351	171/16967	0.752511	Glyma.12G073000/Glyma.07G013500/Glyma.08G197500/Glyma.U021800	4
BP	GO:0010035	response to inorganic substance	3/351	124/16967	0.752511	Glyma.12G073000/Glyma.U021800/Glyma.04G108500	3
BP	GO:0033013	tetrapyrrole metabolic process	2/351	77/16967	0.752511	Glyma.08G064700/Glyma.07G097000	2
BP	GO:0051274	beta-glucan biosynthetic process	2/351	77/16967	0.752511	Glyma.18G271900/Glyma.19G033500	2
BP	GO:0009765	photosynthesis, light harvesting	1/351	31/16967	0.752511	Glyma.15G179400	1
BP	GO:0034605	cellular response to heat	1/351	31/16967	0.752511	Glyma.13G151200	1
BP	GO:0046165	alcohol biosynthetic process	2/351	78/16967	0.758279	Glyma.17G066500/Glyma.07G266200	2
BP	GO:0000272	polysaccharide catabolic process	5/351	221/16967	0.758696	Glyma.10G106600/Glyma.04G236200/Glyma.02G293900/Glyma.05G114000/Glyma.19G245400	5
BP	GO:0006596	polyamine biosynthetic process	1/351	32/16967	0.7628	Glyma.04G007700	1
BP	GO:0006783	heme biosynthetic process	1/351	32/16967	0.7628	Glyma.08G064700	1
BP	GO:0016311	dephosphorylation	5/351	223/16967	0.765996	Glyma.15G201300/Glyma.09G040600/Glyma.07G266200/Glyma.17G030400/Glyma.15G145900	5
BP	GO:0018193	peptidyl-amino acid modification	8/351	368/16967	0.768244	Glyma.18G096500/Glyma.01G166100/Glyma.04G082900/Glyma.19G201400/Glyma.06G084300/Glyma.03G204100/Glyma.08G316500/Glyma.13G362500	8
BP	GO:0055080	cation homeostasis	4/351	176/16967	0.769418	Glyma.07G171600/Glyma.11G202000/Glyma.02G238500/Glyma.16G142100	4
BP	GO:0006694	steroid biosynthetic process	2/351	81/16967	0.775819	Glyma.16G113000/Glyma.09G196000	2
BP	GO:0016485	protein processing	2/351	81/16967	0.775819	Glyma.14G092800/Glyma.17G230700	2
BP	GO:0140352	export from cell	3/351	130/16967	0.780757	Glyma.02G195300/Glyma.02G232000/Glyma.16G116200	3
BP	GO:0006672	ceramide metabolic process	1/351	34/16967	0.783516	Glyma.18G192800	1
BP	GO:0030003	cellular cation homeostasis	3/351	131/16967	0.785253	Glyma.11G202000/Glyma.02G238500/Glyma.16G142100	3
BP	GO:0006534	cysteine metabolic process	1/351	35/16967	0.792132	Glyma.10G172700	1
BP	GO:0042168	heme metabolic process	1/351	35/16967	0.792132	Glyma.08G064700	1
BP	GO:0043647	inositol phosphate metabolic process	1/351	35/16967	0.792132	Glyma.07G266200	1
BP	GO:0009311	oligosaccharide metabolic process	2/351	84/16967	0.792132	Glyma.08G137500/Glyma.06G318400	2
BP	GO:0098771	inorganic ion homeostasis	4/351	182/16967	0.792132	Glyma.07G171600/Glyma.11G202000/Glyma.02G238500/Glyma.16G142100	4
BP	GO:0006897	endocytosis	3/351	134/16967	0.792132	Glyma.06G099700/Glyma.04G082900/Glyma.06G084300	3
BP	GO:0008037	cell recognition	2/351	85/16967	0.792132	Glyma.16G093900/Glyma.07G188800	2
BP	GO:0046434	organophosphate catabolic process	2/351	85/16967	0.792132	Glyma.07G266200/Glyma.01G215100	2
BP	GO:0048544	recognition of pollen	2/351	85/16967	0.792132	Glyma.16G093900/Glyma.07G188800	2
BP	GO:0009062	fatty acid catabolic process	1/351	36/16967	0.792132	Glyma.07G071300	1
BP	GO:0018022	peptidyl-lysine methylation	1/351	36/16967	0.792132	Glyma.13G362500	1
BP	GO:0030148	sphingolipid biosynthetic process	1/351	36/16967	0.792132	Glyma.18G192800	1
BP	GO:0006873	cellular ion homeostasis	3/351	135/16967	0.793957	Glyma.11G202000/Glyma.02G238500/Glyma.16G142100	3
BP	GO:0048585	negative regulation of response to stimulus	1/351	37/16967	0.803344	Glyma.05G155600	1
BP	GO:0019318	hexose metabolic process	4/351	187/16967	0.807978	Glyma.10G145300/Glyma.01G109800/Glyma.17G049700/Glyma.09G003300	4
BP	GO:0042542	response to hydrogen peroxide	1/351	38/16967	0.814163	Glyma.04G108500	1
BP	GO:0061024	membrane organization	6/351	288/16967	0.814943	Glyma.06G099700/Glyma.02G195300/Glyma.17G123800/Glyma.07G189400/Glyma.05G015400/Glyma.15G067100	6
BP	GO:0009908	flower development	2/351	89/16967	0.814943	Glyma.12G073000/Glyma.U021800	2
BP	GO:0090567	reproductive shoot system development	2/351	89/16967	0.814943	Glyma.12G073000/Glyma.U021800	2
BP	GO:0042181	ketone biosynthetic process	1/351	39/16967	0.816081	Glyma.09G236500	1
BP	GO:0046173	polyol biosynthetic process	1/351	39/16967	0.816081	Glyma.07G266200	1
BP	GO:1901661	quinone metabolic process	1/351	39/16967	0.816081	Glyma.09G236500	1
BP	GO:1901663	quinone biosynthetic process	1/351	39/16967	0.816081	Glyma.09G236500	1
BP	GO:0009408	response to heat	2/351	91/16967	0.816386	Glyma.13G151200/Glyma.04G108500	2
BP	GO:0007131	reciprocal meiotic recombination	1/351	40/16967	0.816386	Glyma.11G038500	1
BP	GO:0007186	G protein-coupled receptor signaling pathway	1/351	40/16967	0.816386	Glyma.06G254900	1
BP	GO:0010087	phloem or xylem histogenesis	1/351	40/16967	0.816386	Glyma.10G244600	1
BP	GO:0035825	homologous recombination	1/351	40/16967	0.816386	Glyma.11G038500	1
BP	GO:0140527	reciprocal homologous recombination	1/351	40/16967	0.816386	Glyma.11G038500	1
BP	GO:0030154	cell differentiation	4/351	193/16967	0.816386	Glyma.14G145700/Glyma.11G111700/Glyma.07G108900/Glyma.U029600	4
BP	GO:0009734	auxin-activated signaling pathway	8/351	393/16967	0.816386	Glyma.04G209200/Glyma.06G019500/Glyma.09G238100/Glyma.01G161100/Glyma.17G256500/Glyma.08G010400/Glyma.10G244600/Glyma.06G088300	8
BP	GO:0071365	cellular response to auxin stimulus	8/351	393/16967	0.816386	Glyma.04G209200/Glyma.06G019500/Glyma.09G238100/Glyma.01G161100/Glyma.17G256500/Glyma.08G010400/Glyma.10G244600/Glyma.06G088300	8
BP	GO:0044247	cellular polysaccharide catabolic process	1/351	41/16967	0.823899	Glyma.02G293900	1
BP	GO:0051259	protein complex oligomerization	1/351	41/16967	0.823899	Glyma.04G108500	1
BP	GO:0044242	cellular lipid catabolic process	2/351	94/16967	0.826456	Glyma.07G071300/Glyma.01G215100	2
BP	GO:0048869	cellular developmental process	4/351	197/16967	0.826456	Glyma.14G145700/Glyma.11G111700/Glyma.07G108900/Glyma.U029600	4
BP	GO:0007052	mitotic spindle organization	1/351	42/16967	0.826456	Glyma.05G054600	1
BP	GO:0009691	cytokinin biosynthetic process	1/351	42/16967	0.826456	Glyma.02G198300	1
BP	GO:0045489	pectin biosynthetic process	1/351	42/16967	0.826456	Glyma.18G224200	1
BP	GO:1902850	microtubule cytoskeleton organization involved in mitosis	1/351	42/16967	0.826456	Glyma.05G054600	1
BP	GO:0072527	pyrimidine-containing compound metabolic process	2/351	95/16967	0.829337	Glyma.19G210300/Glyma.17G066500	2
BP	GO:0006928	movement of cell or subcellular component	3/351	147/16967	0.82952	Glyma.06G319500/Glyma.07G005200/Glyma.13G087500	3
BP	GO:0045132	meiotic chromosome segregation	1/351	43/16967	0.833632	Glyma.11G038500	1
BP	GO:0055082	cellular chemical homeostasis	3/351	149/16967	0.8391	Glyma.11G202000/Glyma.02G238500/Glyma.16G142100	3
BP	GO:0015994	chlorophyll metabolic process	1/351	45/16967	0.851299	Glyma.07G097000	1
BP	GO:0006820	anion transport	3/351	152/16967	0.851299	Glyma.18G261900/Glyma.15G115200/Glyma.09G235200	3
BP	GO:0019220	regulation of phosphate metabolic process	3/351	152/16967	0.851299	Glyma.09G040600/Glyma.17G030400/Glyma.15G145900	3
BP	GO:0051174	regulation of phosphorus metabolic process	3/351	152/16967	0.851299	Glyma.09G040600/Glyma.17G030400/Glyma.15G145900	3
BP	GO:0009733	response to auxin	8/351	410/16967	0.855707	Glyma.04G209200/Glyma.06G019500/Glyma.09G238100/Glyma.01G161100/Glyma.17G256500/Glyma.08G010400/Glyma.10G244600/Glyma.06G088300	8
BP	GO:0006721	terpenoid metabolic process	2/351	101/16967	0.855791	Glyma.17G066500/Glyma.09G218600	2
BP	GO:0006479	protein methylation	1/351	47/16967	0.855791	Glyma.13G362500	1
BP	GO:0008213	protein alkylation	1/351	47/16967	0.855791	Glyma.13G362500	1
BP	GO:0009736	cytokinin-activated signaling pathway	1/351	47/16967	0.855791	Glyma.05G155600	1
BP	GO:0051304	chromosome separation	1/351	47/16967	0.855791	Glyma.11G038500	1
BP	GO:0055072	iron ion homeostasis	1/351	47/16967	0.855791	Glyma.07G171600	1
BP	GO:0071368	cellular response to cytokinin stimulus	1/351	47/16967	0.855791	Glyma.05G155600	1
BP	GO:0072329	monocarboxylic acid catabolic process	1/351	47/16967	0.855791	Glyma.07G071300	1
BP	GO:0019684	photosynthesis, light reaction	2/351	103/16967	0.861313	Glyma.15G179400/Glyma.12G215100	2
BP	GO:0006520	cellular amino acid metabolic process	9/351	467/16967	0.861313	Glyma.02G255400/Glyma.02G072200/Glyma.04G007700/Glyma.19G002400/Glyma.11G233900/Glyma.18G023100/Glyma.05G136100/Glyma.16G153400/Glyma.10G172700	9
BP	GO:0009735	response to cytokinin	1/351	48/16967	0.861403	Glyma.05G155600	1
BP	GO:0007127	meiosis I	1/351	49/16967	0.870054	Glyma.11G038500	1
BP	GO:0006541	glutamine metabolic process	1/351	51/16967	0.886626	Glyma.19G002400	1
BP	GO:0006813	potassium ion transport	1/351	51/16967	0.886626	Glyma.08G091900	1
BP	GO:0010243	response to organonitrogen compound	2/351	108/16967	0.886973	Glyma.12G073000/Glyma.U021800	2
BP	GO:0040007	growth	2/351	109/16967	0.887793	Glyma.06G024000/Glyma.04G023800	2
BP	GO:0006891	intra-Golgi vesicle-mediated transport	1/351	52/16967	0.887793	Glyma.15G013900	1
BP	GO:0009309	amine biosynthetic process	1/351	52/16967	0.887793	Glyma.04G007700	1
BP	GO:0042401	cellular biogenic amine biosynthetic process	1/351	52/16967	0.887793	Glyma.04G007700	1
BP	GO:0006338	chromatin remodeling	2/351	110/16967	0.890814	Glyma.01G014700/Glyma.09G207400	2
BP	GO:0000097	sulfur amino acid biosynthetic process	1/351	53/16967	0.890814	Glyma.10G172700	1
BP	GO:0072583	clathrin-dependent endocytosis	1/351	53/16967	0.890814	Glyma.06G099700	1
BP	GO:0051172	negative regulation of nitrogen compound metabolic process	4/351	220/16967	0.890814	Glyma.17G079000/Glyma.13G362500/Glyma.01G131900/Glyma.05G020400	4
BP	GO:0006289	nucleotide-excision repair	1/351	54/16967	0.894463	Glyma.11G038500	1
BP	GO:0006665	sphingolipid metabolic process	1/351	54/16967	0.894463	Glyma.18G192800	1
BP	GO:0006890	retrograde vesicle-mediated transport, Golgi to endoplasmic reticulum	1/351	54/16967	0.894463	Glyma.15G013900	1
BP	GO:0048878	chemical homeostasis	5/351	276/16967	0.89506	Glyma.07G171600/Glyma.11G202000/Glyma.02G238500/Glyma.16G142100/Glyma.04G069500	5
BP	GO:0010256	endomembrane system organization	2/351	113/16967	0.896622	Glyma.07G189400/Glyma.15G067100	2
BP	GO:0051049	regulation of transport	1/351	55/16967	0.896622	Glyma.16G116200	1
BP	GO:0098656	anion transmembrane transport	1/351	55/16967	0.896622	Glyma.15G115200	1
BP	GO:0051052	regulation of DNA metabolic process	1/351	56/16967	0.901884	Glyma.13G362500	1
BP	GO:0061982	meiosis I cell cycle process	1/351	56/16967	0.901884	Glyma.11G038500	1
BP	GO:0051604	protein maturation	2/351	116/16967	0.906931	Glyma.14G092800/Glyma.17G230700	2
BP	GO:0009070	serine family amino acid biosynthetic process	1/351	57/16967	0.906931	Glyma.10G172700	1
BP	GO:0051225	spindle assembly	1/351	59/16967	0.921447	Glyma.05G054600	1
BP	GO:0005996	monosaccharide metabolic process	4/351	233/16967	0.925276	Glyma.10G145300/Glyma.01G109800/Glyma.17G049700/Glyma.09G003300	4
BP	GO:0000096	sulfur amino acid metabolic process	1/351	60/16967	0.925888	Glyma.10G172700	1
BP	GO:0006779	porphyrin-containing compound biosynthetic process	1/351	61/16967	0.926454	Glyma.08G064700	1
BP	GO:0055076	transition metal ion homeostasis	1/351	61/16967	0.926454	Glyma.07G171600	1
BP	GO:1901698	response to nitrogen compound	2/351	122/16967	0.926454	Glyma.12G073000/Glyma.U021800	2
BP	GO:0006081	cellular aldehyde metabolic process	1/351	62/16967	0.926454	Glyma.14G121200	1
BP	GO:0006637	acyl-CoA metabolic process	1/351	62/16967	0.926454	Glyma.07G071300	1
BP	GO:0009225	nucleotide-sugar metabolic process	1/351	62/16967	0.926454	Glyma.08G249900	1
BP	GO:0033014	tetrapyrrole biosynthetic process	1/351	62/16967	0.926454	Glyma.08G064700	1
BP	GO:0035383	thioester metabolic process	1/351	62/16967	0.926454	Glyma.07G071300	1
BP	GO:0019725	cellular homeostasis	3/351	182/16967	0.926454	Glyma.11G202000/Glyma.02G238500/Glyma.16G142100	3
BP	GO:0030258	lipid modification	2/351	124/16967	0.926454	Glyma.07G196800/Glyma.13G030300	2
BP	GO:0042440	pigment metabolic process	2/351	124/16967	0.926454	Glyma.08G064700/Glyma.07G097000	2
BP	GO:0006325	chromatin organization	3/351	183/16967	0.928877	Glyma.01G014700/Glyma.13G362500/Glyma.09G207400	3
BP	GO:0031324	negative regulation of cellular metabolic process	4/351	240/16967	0.929046	Glyma.17G079000/Glyma.13G362500/Glyma.01G131900/Glyma.05G020400	4
BP	GO:0099402	plant organ development	2/351	126/16967	0.929046	Glyma.12G073000/Glyma.U021800	2
BP	GO:0032879	regulation of localization	1/351	64/16967	0.929046	Glyma.16G116200	1
BP	GO:0010393	galacturonan metabolic process	3/351	185/16967	0.929046	Glyma.04G236200/Glyma.05G114000/Glyma.18G224200	3
BP	GO:0045488	pectin metabolic process	3/351	185/16967	0.929046	Glyma.04G236200/Glyma.05G114000/Glyma.18G224200	3
BP	GO:1901607	alpha-amino acid biosynthetic process	3/351	187/16967	0.934707	Glyma.11G233900/Glyma.18G023100/Glyma.10G172700	3
BP	GO:0018298	protein-chromophore linkage	1/351	66/16967	0.934707	Glyma.15G179400	1
BP	GO:0010558	negative regulation of macromolecule biosynthetic process	3/351	188/16967	0.934707	Glyma.17G079000/Glyma.01G131900/Glyma.05G020400	3
BP	GO:2000113	negative regulation of cellular macromolecule biosynthetic process	3/351	188/16967	0.934707	Glyma.17G079000/Glyma.01G131900/Glyma.05G020400	3
BP	GO:0006900	vesicle budding from membrane	1/351	67/16967	0.938474	Glyma.06G099700	1
BP	GO:0000302	response to reactive oxygen species	1/351	68/16967	0.940606	Glyma.04G108500	1
BP	GO:0048278	vesicle docking	1/351	69/16967	0.940606	Glyma.02G195300	1
BP	GO:0042592	homeostatic process	5/351	307/16967	0.940606	Glyma.07G171600/Glyma.11G202000/Glyma.02G238500/Glyma.16G142100/Glyma.04G069500	5
BP	GO:0006888	endoplasmic reticulum to Golgi vesicle-mediated transport	2/351	133/16967	0.940606	Glyma.12G192600/Glyma.15G013900	2
BP	GO:0007015	actin filament organization	2/351	133/16967	0.940606	Glyma.06G319500/Glyma.13G087500	2
BP	GO:0051640	organelle localization	3/351	193/16967	0.940606	Glyma.02G195300/Glyma.07G189400/Glyma.15G067100	3
BP	GO:0009791	post-embryonic development	4/351	251/16967	0.940606	Glyma.12G073000/Glyma.07G013500/Glyma.08G197500/Glyma.U021800	4
BP	GO:0045490	pectin catabolic process	2/351	134/16967	0.940606	Glyma.04G236200/Glyma.05G114000	2
BP	GO:0006906	vesicle fusion	1/351	70/16967	0.940606	Glyma.02G195300	1
BP	GO:0044275	cellular carbohydrate catabolic process	1/351	70/16967	0.940606	Glyma.02G293900	1
BP	GO:0043547	positive regulation of GTPase activity	1/351	71/16967	0.944836	Glyma.01G119300	1
BP	GO:0030036	actin cytoskeleton organization	2/351	136/16967	0.945158	Glyma.06G319500/Glyma.13G087500	2
BP	GO:0031327	negative regulation of cellular biosynthetic process	3/351	197/16967	0.945675	Glyma.17G079000/Glyma.01G131900/Glyma.05G020400	3
BP	GO:0006898	receptor-mediated endocytosis	1/351	72/16967	0.945675	Glyma.06G099700	1
BP	GO:0016050	vesicle organization	2/351	138/16967	0.947034	Glyma.06G099700/Glyma.02G195300	2
BP	GO:0030029	actin filament-based process	2/351	138/16967	0.947034	Glyma.06G319500/Glyma.13G087500	2
BP	GO:0006261	DNA-dependent DNA replication	2/351	139/16967	0.949385	Glyma.01G187400/Glyma.18G027600	2
BP	GO:0051345	positive regulation of hydrolase activity	1/351	74/16967	0.949385	Glyma.01G119300	1
BP	GO:0009890	negative regulation of biosynthetic process	3/351	201/16967	0.949385	Glyma.17G079000/Glyma.01G131900/Glyma.05G020400	3
BP	GO:0043087	regulation of GTPase activity	1/351	75/16967	0.949385	Glyma.01G119300	1
BP	GO:0090174	organelle membrane fusion	1/351	75/16967	0.949385	Glyma.02G195300	1
BP	GO:0045017	glycerolipid biosynthetic process	2/351	141/16967	0.949385	Glyma.07G266200/Glyma.09G196400	2
BP	GO:0046486	glycerolipid metabolic process	3/351	204/16967	0.953399	Glyma.07G266200/Glyma.09G196400/Glyma.01G215100	3
BP	GO:0009069	serine family amino acid metabolic process	1/351	77/16967	0.956058	Glyma.10G172700	1
BP	GO:0000724	double-strand break repair via homologous recombination	1/351	79/16967	0.962596	Glyma.11G038500	1
BP	GO:0090305	nucleic acid phosphodiester bond hydrolysis	1/351	79/16967	0.962596	Glyma.11G038500	1
BP	GO:0009698	phenylpropanoid metabolic process	1/351	80/16967	0.965457	Glyma.05G155600	1
BP	GO:0006661	phosphatidylinositol biosynthetic process	1/351	81/16967	0.965457	Glyma.07G266200	1
BP	GO:0016114	terpenoid biosynthetic process	1/351	81/16967	0.965457	Glyma.17G066500	1
BP	GO:0061025	membrane fusion	1/351	81/16967	0.965457	Glyma.02G195300	1
BP	GO:0031047	gene silencing by RNA	1/351	83/16967	0.972741	Glyma.05G198500	1
BP	GO:0042446	hormone biosynthetic process	1/351	85/16967	0.979636	Glyma.02G198300	1
BP	GO:0061077	chaperone-mediated protein folding	1/351	86/16967	0.980498	Glyma.08G074200	1
BP	GO:0140013	meiotic nuclear division	1/351	86/16967	0.980498	Glyma.11G038500	1
BP	GO:0000725	recombinational repair	1/351	87/16967	0.98127	Glyma.11G038500	1
BP	GO:0019751	polyol metabolic process	1/351	87/16967	0.98127	Glyma.07G266200	1
BP	GO:0051493	regulation of cytoskeleton organization	1/351	88/16967	0.983573	Glyma.05G054600	1
BP	GO:0007051	spindle organization	1/351	89/16967	0.984167	Glyma.05G054600	1
BP	GO:0016458	gene silencing	1/351	89/16967	0.984167	Glyma.05G198500	1
BP	GO:0016052	carbohydrate catabolic process	5/351	351/16967	0.994035	Glyma.10G106600/Glyma.04G236200/Glyma.02G293900/Glyma.05G114000/Glyma.19G245400	5
BP	GO:0050790	regulation of catalytic activity	4/351	293/16967	0.997266	Glyma.09G040600/Glyma.17G030400/Glyma.01G119300/Glyma.15G145900	4
BP	GO:0046700	heterocycle catabolic process	3/351	233/16967	0.999938	Glyma.02G255400/Glyma.20G116800/Glyma.07G097000	3
BP	GO:0044270	cellular nitrogen compound catabolic process	3/351	235/16967	0.999938	Glyma.02G255400/Glyma.20G116800/Glyma.07G097000	3
BP	GO:0065009	regulation of molecular function	4/351	298/16967	0.999938	Glyma.09G040600/Glyma.17G030400/Glyma.01G119300/Glyma.15G145900	4
BP	GO:0048284	organelle fusion	1/351	97/16967	0.999938	Glyma.02G195300	1
BP	GO:0070972	protein localization to endoplasmic reticulum	1/351	98/16967	0.999938	Glyma.12G192600	1
BP	GO:0008652	cellular amino acid biosynthetic process	3/351	241/16967	0.999938	Glyma.11G233900/Glyma.18G023100/Glyma.10G172700	3
BP	GO:0022900	electron transport chain	1/351	101/16967	0.999938	Glyma.12G215100	1
BP	GO:0048523	negative regulation of cellular process	5/351	367/16967	0.999938	Glyma.05G155600/Glyma.17G079000/Glyma.13G362500/Glyma.01G131900/Glyma.05G020400	5
BP	GO:0006400	tRNA modification	1/351	103/16967	0.999938	Glyma.04G099000	1
BP	GO:1903046	meiotic cell cycle process	1/351	103/16967	0.999938	Glyma.11G038500	1
BP	GO:0010605	negative regulation of macromolecule metabolic process	5/351	371/16967	0.999938	Glyma.17G079000/Glyma.13G362500/Glyma.01G131900/Glyma.05G198500/Glyma.05G020400	5
BP	GO:0048367	shoot system development	2/351	179/16967	0.999938	Glyma.12G073000/Glyma.U021800	2
BP	GO:0000280	nuclear division	2/351	180/16967	0.999938	Glyma.11G038500/Glyma.05G054600	2
BP	GO:0006260	DNA replication	2/351	180/16967	0.999938	Glyma.01G187400/Glyma.18G027600	2
BP	GO:0006650	glycerophospholipid metabolic process	2/351	182/16967	0.999938	Glyma.07G266200/Glyma.01G215100	2
BP	GO:0009892	negative regulation of metabolic process	5/351	384/16967	0.999938	Glyma.17G079000/Glyma.13G362500/Glyma.01G131900/Glyma.05G198500/Glyma.05G020400	5
BP	GO:0042545	cell wall modification	1/351	111/16967	0.999938	Glyma.04G236200	1
BP	GO:0097435	supramolecular fiber organization	2/351	188/16967	0.999938	Glyma.06G319500/Glyma.13G087500	2
BP	GO:0043085	positive regulation of catalytic activity	1/351	112/16967	0.999938	Glyma.01G119300	1
BP	GO:0046467	membrane lipid biosynthetic process	1/351	112/16967	0.999938	Glyma.18G192800	1
BP	GO:0006644	phospholipid metabolic process	3/351	258/16967	0.999938	Glyma.09G115800/Glyma.07G266200/Glyma.01G215100	3
BP	GO:0009150	purine ribonucleotide metabolic process	3/351	258/16967	0.999938	Glyma.16G113000/Glyma.07G071300/Glyma.09G196000	3
BP	GO:0018205	peptidyl-lysine modification	1/351	114/16967	0.999938	Glyma.13G362500	1
BP	GO:0046148	pigment biosynthetic process	1/351	114/16967	0.999938	Glyma.08G064700	1
BP	GO:0098813	nuclear chromosome segregation	1/351	114/16967	0.999938	Glyma.11G038500	1
BP	GO:0140014	mitotic nuclear division	1/351	114/16967	0.999938	Glyma.05G054600	1
BP	GO:0007010	cytoskeleton organization	4/351	328/16967	0.999938	Glyma.15G118000/Glyma.06G319500/Glyma.13G087500/Glyma.05G054600	4
BP	GO:0006302	double-strand break repair	1/351	116/16967	0.999938	Glyma.11G038500	1
BP	GO:0007018	microtubule-based movement	1/351	116/16967	0.999938	Glyma.07G005200	1
BP	GO:0010564	regulation of cell cycle process	1/351	117/16967	0.999938	Glyma.05G054600	1
BP	GO:0044093	positive regulation of molecular function	1/351	117/16967	0.999938	Glyma.01G119300	1
BP	GO:0009888	tissue development	1/351	120/16967	0.999938	Glyma.10G244600	1
BP	GO:0006163	purine nucleotide metabolic process	3/351	269/16967	0.999938	Glyma.16G113000/Glyma.07G071300/Glyma.09G196000	3
BP	GO:0048731	system development	4/351	336/16967	0.999938	Glyma.12G073000/Glyma.07G013500/Glyma.08G197500/Glyma.U021800	4
BP	GO:0046474	glycerophospholipid biosynthetic process	1/351	121/16967	0.999938	Glyma.07G266200	1
BP	GO:0043414	macromolecule methylation	1/351	122/16967	0.999938	Glyma.13G362500	1
BP	GO:0006486	protein glycosylation	2/351	203/16967	0.999938	Glyma.10G200700/Glyma.06G108100	2
BP	GO:0043413	macromolecule glycosylation	2/351	203/16967	0.999938	Glyma.10G200700/Glyma.06G108100	2
BP	GO:1903047	mitotic cell cycle process	3/351	275/16967	0.999938	Glyma.01G187400/Glyma.18G027600/Glyma.05G054600	3
BP	GO:0009101	glycoprotein biosynthetic process	2/351	204/16967	0.999938	Glyma.10G200700/Glyma.06G108100	2
BP	GO:0007059	chromosome segregation	1/351	125/16967	0.999938	Glyma.11G038500	1
BP	GO:0016570	histone modification	1/351	126/16967	0.999938	Glyma.13G362500	1
BP	GO:0046488	phosphatidylinositol metabolic process	1/351	127/16967	0.999938	Glyma.07G266200	1
BP	GO:0070085	glycosylation	2/351	209/16967	0.999938	Glyma.10G200700/Glyma.06G108100	2
BP	GO:0019439	aromatic compound catabolic process	3/351	281/16967	0.999938	Glyma.02G255400/Glyma.20G116800/Glyma.07G097000	3
BP	GO:0006643	membrane lipid metabolic process	1/351	130/16967	0.999938	Glyma.18G192800	1
BP	GO:0051321	meiotic cell cycle	1/351	134/16967	0.999938	Glyma.11G038500	1
BP	GO:0008033	tRNA processing	1/351	135/16967	0.999938	Glyma.04G099000	1
BP	GO:1901361	organic cyclic compound catabolic process	3/351	291/16967	0.999938	Glyma.02G255400/Glyma.20G116800/Glyma.07G097000	3
BP	GO:0072521	purine-containing compound metabolic process	3/351	296/16967	0.999938	Glyma.16G113000/Glyma.07G071300/Glyma.09G196000	3
BP	GO:0015979	photosynthesis	2/351	223/16967	0.999938	Glyma.15G179400/Glyma.12G215100	2
BP	GO:0032268	regulation of cellular protein metabolic process	4/351	367/16967	0.999938	Glyma.09G040600/Glyma.17G030400/Glyma.13G362500/Glyma.15G145900	4
BP	GO:0009100	glycoprotein metabolic process	2/351	225/16967	0.999938	Glyma.10G200700/Glyma.06G108100	2
BP	GO:0009259	ribonucleotide metabolic process	3/351	299/16967	0.999938	Glyma.16G113000/Glyma.07G071300/Glyma.09G196000	3
BP	GO:0009658	chloroplast organization	1/351	142/16967	0.999938	Glyma.11G169800	1
BP	GO:0050793	regulation of developmental process	1/351	144/16967	0.999938	Glyma.17G166600	1
BP	GO:0007017	microtubule-based process	3/351	312/16967	0.999938	Glyma.13G357500/Glyma.07G005200/Glyma.05G054600	3
BP	GO:0019693	ribose phosphate metabolic process	3/351	312/16967	0.999938	Glyma.16G113000/Glyma.07G071300/Glyma.09G196000	3
BP	GO:0051246	regulation of protein metabolic process	4/351	387/16967	0.999938	Glyma.09G040600/Glyma.17G030400/Glyma.13G362500/Glyma.15G145900	4
BP	GO:0015980	energy derivation by oxidation of organic compounds	1/351	155/16967	0.999938	Glyma.12G042400	1
BP	GO:0048285	organelle fission	2/351	241/16967	0.999938	Glyma.11G038500/Glyma.05G054600	2
BP	GO:0048193	Golgi vesicle transport	2/351	242/16967	0.999938	Glyma.12G192600/Glyma.15G013900	2
BP	GO:0032259	methylation	3/351	325/16967	0.999938	Glyma.01G004200/Glyma.13G362500/Glyma.16G197200	3
BP	GO:0016567	protein ubiquitination	5/351	468/16967	0.999938	Glyma.02G107500/Glyma.20G036400/Glyma.04G080300/Glyma.11G192900/Glyma.10G018800	5
BP	GO:0009657	plastid organization	1/351	163/16967	0.999938	Glyma.11G169800	1
BP	GO:0008654	phospholipid biosynthetic process	1/351	166/16967	0.999938	Glyma.07G266200	1
BP	GO:0000278	mitotic cell cycle	3/351	337/16967	0.999938	Glyma.01G187400/Glyma.18G027600/Glyma.05G054600	3
BP	GO:0006310	DNA recombination	1/351	173/16967	0.999938	Glyma.11G038500	1
BP	GO:0140694	non-membrane-bounded organelle assembly	1/351	174/16967	0.999938	Glyma.05G054600	1
BP	GO:0000226	microtubule cytoskeleton organization	1/351	177/16967	0.999938	Glyma.05G054600	1
BP	GO:0033043	regulation of organelle organization	1/351	180/16967	0.999938	Glyma.05G054600	1
BP	GO:0006259	DNA metabolic process	5/351	498/16967	0.999938	Glyma.20G116800/Glyma.11G038500/Glyma.01G187400/Glyma.18G027600/Glyma.13G362500	5
BP	GO:0022402	cell cycle process	4/351	433/16967	0.999938	Glyma.11G038500/Glyma.01G187400/Glyma.18G027600/Glyma.05G054600	4
BP	GO:0006457	protein folding	2/351	282/16967	0.999938	Glyma.08G074200/Glyma.04G108500	2
BP	GO:0009117	nucleotide metabolic process	3/351	371/16967	0.999938	Glyma.16G113000/Glyma.07G071300/Glyma.09G196000	3
BP	GO:0051276	chromosome organization	3/351	371/16967	0.999938	Glyma.01G014700/Glyma.13G362500/Glyma.09G207400	3
BP	GO:0034655	nucleobase-containing compound catabolic process	1/351	202/16967	0.999938	Glyma.20G116800	1
BP	GO:0051726	regulation of cell cycle	1/351	209/16967	0.999938	Glyma.05G054600	1
BP	GO:0006753	nucleoside phosphate metabolic process	3/351	389/16967	0.999938	Glyma.16G113000/Glyma.07G071300/Glyma.09G196000	3
BP	GO:0006091	generation of precursor metabolites and energy	3/351	396/16967	0.999938	Glyma.15G179400/Glyma.12G042400/Glyma.12G215100	3
BP	GO:0070925	organelle assembly	1/351	217/16967	0.999938	Glyma.05G054600	1
BP	GO:0006399	tRNA metabolic process	1/351	219/16967	0.999938	Glyma.04G099000	1
BP	GO:0010629	negative regulation of gene expression	1/351	219/16967	0.999938	Glyma.05G198500	1
BP	GO:0051128	regulation of cellular component organization	1/351	225/16967	0.999938	Glyma.05G054600	1
BP	GO:0051301	cell division	1/351	239/16967	0.999938	Glyma.11G220500	1
BP	GO:0045893	positive regulation of transcription, DNA-templated	3/351	434/16967	0.999938	Glyma.14G145700/Glyma.11G111700/Glyma.04G029600	3
BP	GO:1902680	positive regulation of RNA biosynthetic process	3/351	434/16967	0.999938	Glyma.14G145700/Glyma.11G111700/Glyma.04G029600	3
BP	GO:1903508	positive regulation of nucleic acid-templated transcription	3/351	434/16967	0.999938	Glyma.14G145700/Glyma.11G111700/Glyma.04G029600	3
BP	GO:0090407	organophosphate biosynthetic process	3/351	438/16967	0.999938	Glyma.19G210300/Glyma.17G066500/Glyma.07G266200	3
BP	GO:0010557	positive regulation of macromolecule biosynthetic process	3/351	466/16967	0.999938	Glyma.14G145700/Glyma.11G111700/Glyma.04G029600	3
BP	GO:0009891	positive regulation of biosynthetic process	3/351	468/16967	0.999938	Glyma.14G145700/Glyma.11G111700/Glyma.04G029600	3
BP	GO:0031328	positive regulation of cellular biosynthetic process	3/351	468/16967	0.999938	Glyma.14G145700/Glyma.11G111700/Glyma.04G029600	3
BP	GO:0009451	RNA modification	1/351	278/16967	0.999938	Glyma.04G099000	1
BP	GO:0051254	positive regulation of RNA metabolic process	3/351	500/16967	0.999938	Glyma.14G145700/Glyma.11G111700/Glyma.04G029600	3
BP	GO:0033365	protein localization to organelle	1/351	357/16967	0.999938	Glyma.12G192600	1
BP	GO:0006281	DNA repair	1/351	364/16967	0.999938	Glyma.11G038500	1
BP	GO:0006974	cellular response to DNA damage stimulus	1/351	385/16967	0.999938	Glyma.11G038500	1
BP	GO:0034470	ncRNA processing	1/351	457/16967	0.999938	Glyma.04G099000	1
CC	GO:0005618	cell wall	21/457	493/21541	0.0594126	Glyma.01G050100/Glyma.18G003200/Glyma.13G167100/Glyma.13G095000/Glyma.04G236200/Glyma.17G065200/Glyma.18G179800/Glyma.17G065000/Glyma.03G132900/Glyma.12G062700/Glyma.05G114000/Glyma.17G065100/Glyma.13G095200/Glyma.12G022800/Glyma.09G273400/Glyma.02G109100/Glyma.16G164400/Glyma.03G007700/Glyma.14G068000/Glyma.13G095300/Glyma.16G045000	21
CC	GO:0034702	ion channel complex	3/457	13/21541	0.0594126	Glyma.11G202000/Glyma.02G238500/Glyma.16G142100	3
CC	GO:0034703	cation channel complex	3/457	13/21541	0.0594126	Glyma.11G202000/Glyma.02G238500/Glyma.16G142100	3
CC	GO:0034704	calcium channel complex	3/457	13/21541	0.0594126	Glyma.11G202000/Glyma.02G238500/Glyma.16G142100	3
CC	GO:1990246	uniplex complex	3/457	13/21541	0.0594126	Glyma.11G202000/Glyma.02G238500/Glyma.16G142100	3
CC	GO:0031225	anchored component of membrane	12/457	220/21541	0.0594126	Glyma.08G074100/Glyma.18G223900/Glyma.13G158200/Glyma.18G271900/Glyma.19G033500/Glyma.19G198800/Glyma.05G169900/Glyma.03G132900/Glyma.04G074000/Glyma.05G055100/Glyma.02G269000/Glyma.03G261400	12
CC	GO:0031226	intrinsic component of plasma membrane	14/457	284/21541	0.0594503	Glyma.18G223900/Glyma.18G204800/Glyma.13G158200/Glyma.18G271900/Glyma.20G067300/Glyma.19G033500/Glyma.19G198800/Glyma.18G192800/Glyma.05G169900/Glyma.03G132900/Glyma.04G074000/Glyma.02G269000/Glyma.11G048300/Glyma.03G261400	14
CC	GO:0046658	anchored component of plasma membrane	10/457	174/21541	0.0679823	Glyma.18G223900/Glyma.13G158200/Glyma.18G271900/Glyma.19G033500/Glyma.19G198800/Glyma.05G169900/Glyma.03G132900/Glyma.04G074000/Glyma.02G269000/Glyma.03G261400	10
CC	GO:0048046	apoplast	10/457	233/21541	0.404562	Glyma.18G003200/Glyma.13G095000/Glyma.17G065200/Glyma.11G150400/Glyma.11G150300/Glyma.17G065000/Glyma.17G065100/Glyma.13G095200/Glyma.13G095300/Glyma.16G045000	10
CC	GO:0009505	plant-type cell wall	6/457	112/21541	0.425334	Glyma.13G167100/Glyma.18G179800/Glyma.12G022800/Glyma.09G273400/Glyma.16G164400/Glyma.03G007700	6
CC	GO:0031305	integral component of mitochondrial inner membrane	3/457	48/21541	0.940728	Glyma.11G202000/Glyma.02G238500/Glyma.16G142100	3
CC	GO:0031304	intrinsic component of mitochondrial inner membrane	3/457	49/21541	0.940728	Glyma.11G202000/Glyma.02G238500/Glyma.16G142100	3
CC	GO:0032592	integral component of mitochondrial membrane	3/457	58/21541	0.999627	Glyma.11G202000/Glyma.02G238500/Glyma.16G142100	3
CC	GO:0098573	intrinsic component of mitochondrial membrane	3/457	59/21541	0.999627	Glyma.11G202000/Glyma.02G238500/Glyma.16G142100	3
CC	GO:1902495	transmembrane transporter complex	3/457	67/21541	0.999627	Glyma.11G202000/Glyma.02G238500/Glyma.16G142100	3
CC	GO:0031261	DNA replication preinitiation complex	1/457	10/21541	0.999627	Glyma.18G027600	1
CC	GO:0005778	peroxisomal membrane	2/457	39/21541	0.999627	Glyma.16G113000/Glyma.09G196000	2
CC	GO:0031903	microbody membrane	2/457	39/21541	0.999627	Glyma.16G113000/Glyma.09G196000	2
CC	GO:0005887	integral component of plasma membrane	4/457	110/21541	0.999627	Glyma.18G204800/Glyma.20G067300/Glyma.18G192800/Glyma.11G048300	4
CC	GO:0005911	cell-cell junction	7/457	228/21541	0.999627	Glyma.13G167100/Glyma.19G198800/Glyma.12G022800/Glyma.13G076900/Glyma.16G164400/Glyma.03G007700/Glyma.03G261400	7
CC	GO:0009506	plasmodesma	7/457	228/21541	0.999627	Glyma.13G167100/Glyma.19G198800/Glyma.12G022800/Glyma.13G076900/Glyma.16G164400/Glyma.03G007700/Glyma.03G261400	7
CC	GO:0055044	symplast	7/457	228/21541	0.999627	Glyma.13G167100/Glyma.19G198800/Glyma.12G022800/Glyma.13G076900/Glyma.16G164400/Glyma.03G007700/Glyma.03G261400	7
CC	GO:0070161	anchoring junction	7/457	228/21541	0.999627	Glyma.13G167100/Glyma.19G198800/Glyma.12G022800/Glyma.13G076900/Glyma.16G164400/Glyma.03G007700/Glyma.03G261400	7
CC	GO:1990351	transporter complex	3/457	75/21541	0.999627	Glyma.11G202000/Glyma.02G238500/Glyma.16G142100	3
CC	GO:0030054	cell junction	7/457	229/21541	0.999627	Glyma.13G167100/Glyma.19G198800/Glyma.12G022800/Glyma.13G076900/Glyma.16G164400/Glyma.03G007700/Glyma.03G261400	7
CC	GO:0005802	trans-Golgi network	5/457	164/21541	0.999627	Glyma.18G261900/Glyma.18G192800/Glyma.01G195000/Glyma.16G197200/Glyma.09G235200	5
CC	GO:0005777	peroxisome	4/457	126/21541	0.999627	Glyma.16G113000/Glyma.13G109800/Glyma.09G236500/Glyma.09G196000	4
CC	GO:0042579	microbody	4/457	126/21541	0.999627	Glyma.16G113000/Glyma.13G109800/Glyma.09G236500/Glyma.09G196000	4
CC	GO:0031464	Cul4A-RING E3 ubiquitin ligase complex	1/457	16/21541	0.999627	Glyma.04G080300	1
CC	GO:0030286	dynein complex	1/457	19/21541	0.999627	Glyma.13G357500	1
CC	GO:0030894	replisome	1/457	19/21541	0.999627	Glyma.01G187400	1
CC	GO:0043601	nuclear replisome	1/457	19/21541	0.999627	Glyma.01G187400	1
CC	GO:1990391	DNA repair complex	1/457	20/21541	0.999627	Glyma.11G038500	1
CC	GO:0090575	RNA polymerase II transcription regulator complex	4/457	142/21541	0.999627	Glyma.04G182600/Glyma.U035800/Glyma.12G114300/Glyma.06G291900	4
CC	GO:0031012	extracellular matrix	1/457	21/21541	0.999627	Glyma.01G036900	1
CC	GO:0098791	Golgi apparatus subcompartment	5/457	187/21541	0.999627	Glyma.18G261900/Glyma.18G192800/Glyma.01G195000/Glyma.16G197200/Glyma.09G235200	5
CC	GO:0072686	mitotic spindle	1/457	22/21541	0.999627	Glyma.05G054600	1
CC	GO:0005938	cell cortex	3/457	106/21541	0.999627	Glyma.12G073000/Glyma.02G232000/Glyma.U021800	3
CC	GO:0042575	DNA polymerase complex	1/457	24/21541	0.999627	Glyma.01G187400	1
CC	GO:0005880	nuclear microtubule	1/457	26/21541	0.999627	Glyma.05G054600	1
CC	GO:0005615	extracellular space	3/457	114/21541	0.999627	Glyma.02G208200/Glyma.15G054600/Glyma.08G071300	3
CC	GO:0043596	nuclear replication fork	1/457	27/21541	0.999627	Glyma.01G187400	1
CC	GO:0030126	COPI vesicle coat	1/457	28/21541	0.999627	Glyma.15G013900	1
CC	GO:0030137	COPI-coated vesicle	1/457	30/21541	0.999627	Glyma.15G013900	1
CC	GO:0030663	COPI-coated vesicle membrane	1/457	30/21541	0.999627	Glyma.15G013900	1
CC	GO:0005680	anaphase-promoting complex	1/457	31/21541	0.999627	Glyma.11G220500	1
CC	GO:0000152	nuclear ubiquitin ligase complex	1/457	33/21541	0.999627	Glyma.11G220500	1
CC	GO:0080008	Cul4-RING E3 ubiquitin ligase complex	1/457	34/21541	0.999627	Glyma.04G080300	1
CC	GO:0009654	photosystem II oxygen evolving complex	1/457	38/21541	0.999627	Glyma.12G215100	1
CC	GO:0098800	inner mitochondrial membrane protein complex	3/457	140/21541	0.999627	Glyma.11G202000/Glyma.02G238500/Glyma.16G142100	3
CC	GO:0009523	photosystem II	2/457	93/21541	0.999627	Glyma.15G179400/Glyma.12G215100	2
CC	GO:0005667	transcription regulator complex	4/457	196/21541	0.999627	Glyma.04G182600/Glyma.U035800/Glyma.12G114300/Glyma.06G291900	4
CC	GO:0015629	actin cytoskeleton	2/457	95/21541	0.999627	Glyma.06G319500/Glyma.13G087500	2
CC	GO:0030173	integral component of Golgi membrane	1/457	46/21541	0.999627	Glyma.18G192800	1
CC	GO:0031228	intrinsic component of Golgi membrane	1/457	46/21541	0.999627	Glyma.18G192800	1
CC	GO:0000228	nuclear chromosome	2/457	101/21541	0.999627	Glyma.01G187400/Glyma.18G027600	2
CC	GO:0005905	clathrin-coated pit	1/457	49/21541	0.999627	Glyma.06G099700	1
CC	GO:0098590	plasma membrane region	1/457	50/21541	0.999627	Glyma.06G099700	1
CC	GO:0005657	replication fork	1/457	51/21541	0.999627	Glyma.01G187400	1
CC	GO:0009707	chloroplast outer membrane	1/457	53/21541	0.999627	Glyma.11G169800	1
CC	GO:0000145	exocyst	1/457	54/21541	0.999627	Glyma.02G232000	1
CC	GO:0031301	integral component of organelle membrane	4/457	221/21541	0.999627	Glyma.11G202000/Glyma.18G192800/Glyma.02G238500/Glyma.16G142100	4
CC	GO:0009522	photosystem I	1/457	55/21541	0.999627	Glyma.15G179400	1
CC	GO:0019867	outer membrane	2/457	115/21541	0.999627	Glyma.11G169800/Glyma.16G203100	2
CC	GO:0031968	organelle outer membrane	2/457	115/21541	0.999627	Glyma.11G169800/Glyma.16G203100	2
CC	GO:0031300	intrinsic component of organelle membrane	4/457	226/21541	0.999627	Glyma.11G202000/Glyma.18G192800/Glyma.02G238500/Glyma.16G142100	4
CC	GO:0009521	photosystem	2/457	119/21541	0.999627	Glyma.15G179400/Glyma.12G215100	2
CC	GO:0005643	nuclear pore	1/457	60/21541	0.999627	Glyma.01G119300	1
CC	GO:0005798	Golgi-associated vesicle	1/457	61/21541	0.999627	Glyma.15G013900	1
CC	GO:0030660	Golgi-associated vesicle membrane	1/457	61/21541	0.999627	Glyma.15G013900	1
CC	GO:0009527	plastid outer membrane	1/457	62/21541	0.999627	Glyma.11G169800	1
CC	GO:0005741	mitochondrial outer membrane	1/457	64/21541	0.999627	Glyma.16G203100	1
CC	GO:0009705	plant-type vacuole membrane	1/457	64/21541	0.999627	Glyma.13G186600	1
CC	GO:0031201	SNARE complex	1/457	64/21541	0.999627	Glyma.02G195300	1
CC	GO:0000139	Golgi membrane	6/457	347/21541	0.999627	Glyma.08G104600/Glyma.07G215600/Glyma.18G192800/Glyma.01G195000/Glyma.06G108100/Glyma.18G224200	6
CC	GO:0030136	clathrin-coated vesicle	1/457	66/21541	0.999627	Glyma.06G099700	1
CC	GO:0005819	spindle	1/457	70/21541	0.999627	Glyma.05G054600	1
CC	GO:0031969	chloroplast membrane	2/457	135/21541	0.999627	Glyma.11G169800/Glyma.10G295300	2
CC	GO:0032993	protein-DNA complex	2/457	136/21541	0.999627	Glyma.01G187400/Glyma.18G027600	2
CC	GO:0019898	extrinsic component of membrane	1/457	83/21541	0.999627	Glyma.12G215100	1
CC	GO:0030120	vesicle coat	1/457	84/21541	0.999627	Glyma.15G013900	1
CC	GO:0005635	nuclear envelope	1/457	89/21541	0.999627	Glyma.01G119300	1
CC	GO:0098798	mitochondrial protein-containing complex	3/457	226/21541	0.999627	Glyma.11G202000/Glyma.02G238500/Glyma.16G142100	3
CC	GO:0030135	coated vesicle	2/457	164/21541	0.999627	Glyma.06G099700/Glyma.15G013900	2
CC	GO:0009570	chloroplast stroma	2/457	165/21541	0.999627	Glyma.14G098100/Glyma.17G226600	2
CC	GO:0005875	microtubule associated complex	1/457	96/21541	0.999627	Glyma.13G357500	1
CC	GO:0031461	cullin-RING ubiquitin ligase complex	2/457	168/21541	0.999627	Glyma.04G080300/Glyma.11G220500	2
CC	GO:0009532	plastid stroma	2/457	169/21541	0.999627	Glyma.14G098100/Glyma.17G226600	2
CC	GO:0030662	coated vesicle membrane	1/457	102/21541	0.999627	Glyma.15G013900	1
CC	GO:0005774	vacuolar membrane	3/457	243/21541	0.999627	Glyma.09G238100/Glyma.14G205100/Glyma.13G186600	3
CC	GO:0030176	integral component of endoplasmic reticulum membrane	1/457	105/21541	0.999627	Glyma.18G192800	1
CC	GO:0031227	intrinsic component of endoplasmic reticulum membrane	1/457	109/21541	0.999627	Glyma.18G192800	1
CC	GO:0031966	mitochondrial membrane	5/457	380/21541	0.999627	Glyma.16G203100/Glyma.11G202000/Glyma.02G238500/Glyma.16G142100/Glyma.07G144200	5
CC	GO:0099023	vesicle tethering complex	1/457	112/21541	0.999627	Glyma.02G232000	1
CC	GO:0000325	plant-type vacuole	1/457	113/21541	0.999627	Glyma.13G186600	1
CC	GO:0042651	thylakoid membrane	3/457	259/21541	0.999627	Glyma.15G179400/Glyma.08G336100/Glyma.12G215100	3
CC	GO:0005740	mitochondrial envelope	5/457	391/21541	0.999627	Glyma.16G203100/Glyma.11G202000/Glyma.02G238500/Glyma.16G142100/Glyma.07G144200	5
CC	GO:0030117	membrane coat	1/457	119/21541	0.999627	Glyma.15G013900	1
CC	GO:0048475	coated membrane	1/457	119/21541	0.999627	Glyma.15G013900	1
CC	GO:0005874	microtubule	3/457	266/21541	0.999627	Glyma.13G357500/Glyma.07G005200/Glyma.05G054600	3
CC	GO:0005789	endoplasmic reticulum membrane	6/457	459/21541	0.999627	Glyma.16G113000/Glyma.07G189400/Glyma.15G067100/Glyma.18G192800/Glyma.12G192600/Glyma.09G196000	6
CC	GO:0042175	nuclear outer membrane-endoplasmic reticulum membrane network	6/457	459/21541	0.999627	Glyma.16G113000/Glyma.07G189400/Glyma.15G067100/Glyma.18G192800/Glyma.12G192600/Glyma.09G196000	6
CC	GO:0034357	photosynthetic membrane	3/457	269/21541	0.999627	Glyma.15G179400/Glyma.08G336100/Glyma.12G215100	3
CC	GO:0098827	endoplasmic reticulum subcompartment	6/457	463/21541	0.999627	Glyma.16G113000/Glyma.07G189400/Glyma.15G067100/Glyma.18G192800/Glyma.12G192600/Glyma.09G196000	6
CC	GO:0099081	supramolecular polymer	3/457	274/21541	0.999627	Glyma.13G357500/Glyma.07G005200/Glyma.05G054600	3
CC	GO:0099512	supramolecular fiber	3/457	274/21541	0.999627	Glyma.13G357500/Glyma.07G005200/Glyma.05G054600	3
CC	GO:0099513	polymeric cytoskeletal fiber	3/457	274/21541	0.999627	Glyma.13G357500/Glyma.07G005200/Glyma.05G054600	3
CC	GO:0009941	chloroplast envelope	2/457	211/21541	0.999627	Glyma.11G169800/Glyma.10G295300	2
CC	GO:0009535	chloroplast thylakoid membrane	2/457	218/21541	0.999627	Glyma.15G179400/Glyma.08G336100	2
CC	GO:0055035	plastid thylakoid membrane	2/457	218/21541	0.999627	Glyma.15G179400/Glyma.08G336100	2
CC	GO:0042170	plastid membrane	4/457	359/21541	0.999627	Glyma.11G169800/Glyma.15G179400/Glyma.08G336100/Glyma.10G295300	4
CC	GO:1990204	oxidoreductase complex	1/457	140/21541	0.999627	Glyma.12G215100	1
CC	GO:0000151	ubiquitin ligase complex	2/457	222/21541	0.999627	Glyma.04G080300/Glyma.11G220500	2
CC	GO:0005743	mitochondrial inner membrane	3/457	304/21541	0.999627	Glyma.11G202000/Glyma.02G238500/Glyma.16G142100	3
CC	GO:0055029	nuclear DNA-directed RNA polymerase complex	1/457	149/21541	0.999627	Glyma.01G187400	1
CC	GO:0005856	cytoskeleton	5/457	447/21541	0.999627	Glyma.13G357500/Glyma.06G319500/Glyma.07G005200/Glyma.13G087500/Glyma.05G054600	5
CC	GO:0015630	microtubule cytoskeleton	3/457	311/21541	0.999627	Glyma.13G357500/Glyma.07G005200/Glyma.05G054600	3
CC	GO:0000428	DNA-directed RNA polymerase complex	1/457	157/21541	0.999627	Glyma.01G187400	1
CC	GO:0005773	vacuole	5/457	464/21541	0.999627	Glyma.09G238100/Glyma.14G092800/Glyma.14G205100/Glyma.13G186600/Glyma.17G230700	5
CC	GO:0030880	RNA polymerase complex	1/457	166/21541	0.999627	Glyma.01G187400	1
CC	GO:0009579	thylakoid	3/457	341/21541	0.999627	Glyma.15G179400/Glyma.08G336100/Glyma.12G215100	3
CC	GO:0009526	plastid envelope	4/457	420/21541	0.999627	Glyma.11G169800/Glyma.15G179400/Glyma.08G336100/Glyma.10G295300	4
CC	GO:0009534	chloroplast thylakoid	2/457	272/21541	0.999627	Glyma.15G179400/Glyma.08G336100	2
CC	GO:0031976	plastid thylakoid	2/457	272/21541	0.999627	Glyma.15G179400/Glyma.08G336100	2
CC	GO:0019866	organelle inner membrane	3/457	354/21541	0.999627	Glyma.11G202000/Glyma.02G238500/Glyma.16G142100	3
CC	GO:0099080	supramolecular complex	3/457	366/21541	0.999627	Glyma.13G357500/Glyma.07G005200/Glyma.05G054600	3
CC	GO:0030659	cytoplasmic vesicle membrane	1/457	216/21541	0.999627	Glyma.15G013900	1
CC	GO:0012506	vesicle membrane	1/457	217/21541	0.999627	Glyma.15G013900	1
CC	GO:0005768	endosome	2/457	315/21541	0.999627	Glyma.01G195000/Glyma.16G197200	2
CC	GO:0005694	chromosome	2/457	395/21541	0.999627	Glyma.01G187400/Glyma.18G027600	2
CC	GO:0061695	transferase complex, transferring phosphorus-containing groups	1/457	321/21541	0.999627	Glyma.01G187400	1
CC	GO:0005654	nucleoplasm	1/457	365/21541	0.999627	Glyma.18G027600	1
MF	GO:0005516	calmodulin binding	18/534	194/22279	0.000395748	Glyma.01G193600/Glyma.18G096500/Glyma.16G196900/Glyma.01G166100/Glyma.17G038800/Glyma.16G145600/Glyma.19G201400/Glyma.03G232400/Glyma.03G232500/Glyma.05G178200/Glyma.03G204100/Glyma.08G135200/Glyma.08G316500/Glyma.10G148700/Glyma.19G229400/Glyma.08G044400/Glyma.03G093600/Glyma.11G048300	18
MF	GO:0016762	xyloglucan:xyloglucosyl transferase activity	8/534	55/22279	0.00833772	Glyma.18G003200/Glyma.13G095000/Glyma.17G065200/Glyma.17G065000/Glyma.17G065100/Glyma.13G095200/Glyma.13G095300/Glyma.16G045000	8
MF	GO:0043178	alcohol binding	8/534	58/22279	0.00833772	Glyma.09G040600/Glyma.19G210300/Glyma.17G030400/Glyma.18G261900/Glyma.15G145900/Glyma.09G040400/Glyma.07G243900/Glyma.09G235200	8
MF	GO:0005509	calcium ion binding	22/534	389/22279	0.0177849	Glyma.18G096500/Glyma.05G245600/Glyma.14G157700/Glyma.01G166100/Glyma.15G238500/Glyma.08G136200/Glyma.03G157800/Glyma.15G238400/Glyma.19G201400/Glyma.12G185400/Glyma.17G034900/Glyma.10G178400/Glyma.10G002200/Glyma.03G204100/Glyma.08G316500/Glyma.11G097500/Glyma.18G290300/Glyma.01G215100/Glyma.12G217500/Glyma.03G236300/Glyma.13G283600/Glyma.12G215100	22
MF	GO:0008422	beta-glucosidase activity	10/534	108/22279	0.0197336	Glyma.10G106600/Glyma.11G129900/Glyma.13G316200/Glyma.18G291500/Glyma.12G054100/Glyma.03G132900/Glyma.12G054200/Glyma.04G074000/Glyma.12G053900/Glyma.02G269000	10
MF	GO:0033293	monocarboxylic acid binding	8/534	76/22279	0.0259137	Glyma.09G040600/Glyma.14G098100/Glyma.17G030400/Glyma.15G145900/Glyma.09G040400/Glyma.17G226600/Glyma.18G191600/Glyma.07G243900	8
MF	GO:0046873	metal ion transmembrane transporter activity	16/534	257/22279	0.0259137	Glyma.01G193600/Glyma.13G338300/Glyma.08G164400/Glyma.11G202000/Glyma.15G262800/Glyma.05G132900/Glyma.12G170500/Glyma.08G091900/Glyma.13G186600/Glyma.17G165200/Glyma.02G238500/Glyma.13G004400/Glyma.16G142100/Glyma.18G060300/Glyma.08G072400/Glyma.11G048300	16
MF	GO:0005385	zinc ion transmembrane transporter activity	5/534	29/22279	0.0259137	Glyma.13G338300/Glyma.08G164400/Glyma.15G262800/Glyma.13G004400/Glyma.18G060300	5
MF	GO:0043531	ADP binding	14/534	216/22279	0.0304522	Glyma.16G135200/Glyma.13G028100/Glyma.12G135600/Glyma.08G303700/Glyma.12G236500/Glyma.03G075300/Glyma.12G011700/Glyma.20G061300/Glyma.06G259800/Glyma.05G082400/Glyma.20G020200/Glyma.11G153000/Glyma.18G281600/Glyma.06G260100	14
MF	GO:0015926	glucosidase activity	10/534	130/22279	0.0425763	Glyma.10G106600/Glyma.11G129900/Glyma.13G316200/Glyma.18G291500/Glyma.12G054100/Glyma.03G132900/Glyma.12G054200/Glyma.04G074000/Glyma.12G053900/Glyma.02G269000	10
MF	GO:0016717	oxidoreductase activity, acting on paired donors, with oxidation of a pair of donors resulting in the reduction of molecular oxygen to two molecules of water	4/534	22/22279	0.0557343	Glyma.18G202600/Glyma.08G212900/Glyma.07G151300/Glyma.14G194300	4
MF	GO:0015292	uniporter activity	3/534	11/22279	0.0590404	Glyma.11G202000/Glyma.02G238500/Glyma.16G142100	3
MF	GO:0046527	glucosyltransferase activity	12/534	196/22279	0.0738173	Glyma.18G003200/Glyma.15G054300/Glyma.13G095000/Glyma.17G065200/Glyma.01G036000/Glyma.02G029900/Glyma.17G065000/Glyma.17G065100/Glyma.13G095200/Glyma.13G090300/Glyma.13G095300/Glyma.16G045000	12
MF	GO:0010427	abscisic acid binding	5/534	41/22279	0.0738173	Glyma.09G040600/Glyma.17G030400/Glyma.15G145900/Glyma.09G040400/Glyma.07G243900	5
MF	GO:0016210	naringenin-chalcone synthase activity	3/534	13/22279	0.0745383	Glyma.08G109500/Glyma.02G130400/Glyma.08G109300	3
MF	GO:0046915	transition metal ion transmembrane transporter activity	7/534	81/22279	0.0745383	Glyma.13G338300/Glyma.08G164400/Glyma.15G262800/Glyma.05G132900/Glyma.13G004400/Glyma.18G060300/Glyma.08G072400	7
MF	GO:0030247	polysaccharide binding	7/534	83/22279	0.0804212	Glyma.17G214400/Glyma.14G157700/Glyma.07G095900/Glyma.17G214100/Glyma.05G237100/Glyma.07G094500/Glyma.09G181600	7
MF	GO:0005507	copper ion binding	8/534	107/22279	0.0853129	Glyma.05G132900/Glyma.06G307100/Glyma.11G059200/Glyma.01G183100/Glyma.13G076900/Glyma.11G097300/Glyma.17G012300/Glyma.12G023300	8
MF	GO:0019840	isoprenoid binding	5/534	46/22279	0.0895902	Glyma.09G040600/Glyma.17G030400/Glyma.15G145900/Glyma.09G040400/Glyma.07G243900	5
MF	GO:0038023	signaling receptor activity	10/534	159/22279	0.0895902	Glyma.09G040600/Glyma.18G185400/Glyma.17G030400/Glyma.07G183900/Glyma.13G161500/Glyma.05G119600/Glyma.15G145900/Glyma.09G040400/Glyma.05G119500/Glyma.07G243900	10
MF	GO:0042562	hormone binding	5/534	47/22279	0.0895902	Glyma.09G040600/Glyma.17G030400/Glyma.15G145900/Glyma.09G040400/Glyma.07G243900	5
MF	GO:0005262	calcium channel activity	3/534	16/22279	0.0999802	Glyma.11G202000/Glyma.02G238500/Glyma.16G142100	3
MF	GO:0004864	protein phosphatase inhibitor activity	5/534	54/22279	0.14718	Glyma.09G040600/Glyma.17G030400/Glyma.15G145900/Glyma.09G040400/Glyma.07G243900	5
MF	GO:0019212	phosphatase inhibitor activity	5/534	55/22279	0.152172	Glyma.09G040600/Glyma.17G030400/Glyma.15G145900/Glyma.09G040400/Glyma.07G243900	5
MF	GO:0031406	carboxylic acid binding	8/534	126/22279	0.152612	Glyma.09G040600/Glyma.14G098100/Glyma.17G030400/Glyma.15G145900/Glyma.09G040400/Glyma.17G226600/Glyma.18G191600/Glyma.07G243900	8
MF	GO:0060089	molecular transducer activity	10/534	180/22279	0.152612	Glyma.09G040600/Glyma.18G185400/Glyma.17G030400/Glyma.07G183900/Glyma.13G161500/Glyma.05G119600/Glyma.15G145900/Glyma.09G040400/Glyma.05G119500/Glyma.07G243900	10
MF	GO:0016758	hexosyltransferase activity	19/534	448/22279	0.152612	Glyma.11G053400/Glyma.10G145300/Glyma.18G003200/Glyma.15G054300/Glyma.13G095000/Glyma.17G065200/Glyma.01G036000/Glyma.08G181000/Glyma.02G029900/Glyma.17G065000/Glyma.18G192800/Glyma.01G195000/Glyma.17G065100/Glyma.13G095200/Glyma.06G108100/Glyma.18G224200/Glyma.13G090300/Glyma.13G095300/Glyma.16G045000	19
MF	GO:0015085	calcium ion transmembrane transporter activity	5/534	58/22279	0.152612	Glyma.01G193600/Glyma.11G202000/Glyma.02G238500/Glyma.16G142100/Glyma.11G048300	5
MF	GO:0080043	quercetin 3-O-glucosyltransferase activity	4/534	38/22279	0.152612	Glyma.15G054300/Glyma.01G036000/Glyma.02G029900/Glyma.13G090300	4
MF	GO:0080044	quercetin 7-O-glucosyltransferase activity	4/534	38/22279	0.152612	Glyma.15G054300/Glyma.01G036000/Glyma.02G029900/Glyma.13G090300	4
MF	GO:0008061	chitin binding	3/534	21/22279	0.153082	Glyma.15G206800/Glyma.19G245400/Glyma.02G007400	3
MF	GO:0004683	calmodulin-dependent protein kinase activity	5/534	60/22279	0.153082	Glyma.18G096500/Glyma.01G166100/Glyma.19G201400/Glyma.03G204100/Glyma.08G316500	5
MF	GO:0009931	calcium-dependent protein serine/threonine kinase activity	5/534	60/22279	0.153082	Glyma.18G096500/Glyma.01G166100/Glyma.19G201400/Glyma.03G204100/Glyma.08G316500	5
MF	GO:0010857	calcium-dependent protein kinase activity	5/534	60/22279	0.153082	Glyma.18G096500/Glyma.01G166100/Glyma.19G201400/Glyma.03G204100/Glyma.08G316500	5
MF	GO:0008378	galactosyltransferase activity	3/534	22/22279	0.155413	Glyma.10G145300/Glyma.01G195000/Glyma.06G108100	3
MF	GO:0051213	dioxygenase activity	11/534	216/22279	0.155768	Glyma.14G058700/Glyma.07G196800/Glyma.01G014700/Glyma.13G030300/Glyma.14G049200/Glyma.15G026500/Glyma.02G257700/Glyma.09G207400/Glyma.08G050400/Glyma.13G347800/Glyma.07G150900	11
MF	GO:0004601	peroxidase activity	10/534	189/22279	0.157505	Glyma.05G103600/Glyma.18G211000/Glyma.13G167100/Glyma.15G129200/Glyma.02G234200/Glyma.06G275900/Glyma.16G164400/Glyma.03G236300/Glyma.03G007700/Glyma.16G164200	10
MF	GO:0016684	oxidoreductase activity, acting on peroxide as acceptor	10/534	190/22279	0.158545	Glyma.05G103600/Glyma.18G211000/Glyma.13G167100/Glyma.15G129200/Glyma.02G234200/Glyma.06G275900/Glyma.16G164400/Glyma.03G236300/Glyma.03G007700/Glyma.16G164200	10
MF	GO:0042973	glucan endo-1,3-beta-D-glucosidase activity	5/534	65/22279	0.183281	Glyma.13G316200/Glyma.18G291500/Glyma.03G132900/Glyma.04G074000/Glyma.02G269000	5
MF	GO:0005544	calcium-dependent phospholipid binding	3/534	26/22279	0.213996	Glyma.15G238500/Glyma.08G136200/Glyma.15G238400	3
MF	GO:0004190	aspartic-type endopeptidase activity	7/534	125/22279	0.243469	Glyma.08G321400/Glyma.06G114200/Glyma.01G163000/Glyma.07G055300/Glyma.02G045100/Glyma.16G024000/Glyma.18G110200	7
MF	GO:0070001	aspartic-type peptidase activity	7/534	125/22279	0.243469	Glyma.08G321400/Glyma.06G114200/Glyma.01G163000/Glyma.07G055300/Glyma.02G045100/Glyma.16G024000/Glyma.18G110200	7
MF	GO:0004675	transmembrane receptor protein serine/threonine kinase activity	4/534	50/22279	0.243469	Glyma.18G185400/Glyma.07G183900/Glyma.05G119600/Glyma.05G119500	4
MF	GO:0016628	oxidoreductase activity, acting on the CH-CH group of donors, NAD or NADP as acceptor	4/534	50/22279	0.243469	Glyma.03G098600/Glyma.13G109800/Glyma.11G233900/Glyma.18G023100	4
MF	GO:0003933	GTP cyclohydrolase activity	2/534	12/22279	0.243469	Glyma.15G055700/Glyma.08G177300	2
MF	GO:0016639	oxidoreductase activity, acting on the CH-NH2 group of donors, NAD or NADP as acceptor	2/534	12/22279	0.243469	Glyma.02G072200/Glyma.16G153400	2
MF	GO:0035529	NADH pyrophosphatase activity	2/534	12/22279	0.243469	Glyma.13G006700/Glyma.20G062000	2
MF	GO:0047631	ADP-ribose diphosphatase activity	2/534	12/22279	0.243469	Glyma.13G006700/Glyma.20G062000	2
MF	GO:0019199	transmembrane receptor protein kinase activity	4/534	51/22279	0.248497	Glyma.18G185400/Glyma.07G183900/Glyma.05G119600/Glyma.05G119500	4
MF	GO:0005102	signaling receptor binding	4/534	52/22279	0.251775	Glyma.U029600/Glyma.05G119600/Glyma.04G217600/Glyma.05G119500	4
MF	GO:0004470	malic enzyme activity	2/534	13/22279	0.251775	Glyma.04G086300/Glyma.06G087800	2
MF	GO:0004471	malate dehydrogenase (decarboxylating) (NAD+) activity	2/534	13/22279	0.251775	Glyma.04G086300/Glyma.06G087800	2
MF	GO:0015114	phosphate ion transmembrane transporter activity	2/534	13/22279	0.251775	Glyma.18G261900/Glyma.09G235200	2
MF	GO:0019139	cytokinin dehydrogenase activity	2/534	13/22279	0.251775	Glyma.09G225400/Glyma.13G104700	2
MF	GO:0004568	chitinase activity	3/534	32/22279	0.267364	Glyma.15G206800/Glyma.19G245400/Glyma.02G007400	3
MF	GO:0000822	inositol hexakisphosphate binding	2/534	14/22279	0.278838	Glyma.18G261900/Glyma.09G235200	2
MF	GO:0008289	lipid binding	15/534	385/22279	0.286086	Glyma.06G099700/Glyma.09G040600/Glyma.08G074100/Glyma.15G238500/Glyma.08G136200/Glyma.15G238400/Glyma.14G098100/Glyma.17G030400/Glyma.15G145900/Glyma.09G040400/Glyma.17G226600/Glyma.12G028200/Glyma.17G236700/Glyma.18G191600/Glyma.07G243900	15
MF	GO:0015662	P-type ion transporter activity	4/534	57/22279	0.286086	Glyma.01G193600/Glyma.05G132900/Glyma.08G072400/Glyma.11G048300	4
MF	GO:0140358	P-type transmembrane transporter activity	4/534	57/22279	0.286086	Glyma.01G193600/Glyma.05G132900/Glyma.08G072400/Glyma.11G048300	4
MF	GO:0004805	trehalose-phosphatase activity	2/534	15/22279	0.286086	Glyma.08G137500/Glyma.06G318400	2
MF	GO:0016872	intramolecular lyase activity	2/534	15/22279	0.286086	Glyma.14G098100/Glyma.17G226600	2
MF	GO:0034647	histone H3-tri/di/monomethyl-lysine-4 demethylase activity	2/534	15/22279	0.286086	Glyma.01G014700/Glyma.09G207400	2
MF	GO:0004567	beta-mannosidase activity	3/534	35/22279	0.287807	Glyma.06G319500/Glyma.10G154400/Glyma.13G087500	3
MF	GO:0005504	fatty acid binding	3/534	35/22279	0.287807	Glyma.14G098100/Glyma.17G226600/Glyma.18G191600	3
MF	GO:0016209	antioxidant activity	10/534	232/22279	0.293486	Glyma.05G103600/Glyma.18G211000/Glyma.13G167100/Glyma.15G129200/Glyma.02G234200/Glyma.06G275900/Glyma.16G164400/Glyma.03G236300/Glyma.03G007700/Glyma.16G164200	10
MF	GO:0005375	copper ion transmembrane transporter activity	2/534	16/22279	0.293486	Glyma.05G132900/Glyma.08G072400	2
MF	GO:0009975	cyclase activity	2/534	16/22279	0.293486	Glyma.18G280900/Glyma.08G256600	2
MF	GO:0032453	histone H3-methyl-lysine-4 demethylase activity	2/534	16/22279	0.293486	Glyma.01G014700/Glyma.09G207400	2
MF	GO:0022890	inorganic cation transmembrane transporter activity	17/534	469/22279	0.309279	Glyma.01G193600/Glyma.13G338300/Glyma.18G204800/Glyma.08G164400/Glyma.11G202000/Glyma.15G262800/Glyma.05G132900/Glyma.12G170500/Glyma.08G091900/Glyma.13G186600/Glyma.17G165200/Glyma.02G238500/Glyma.13G004400/Glyma.16G142100/Glyma.18G060300/Glyma.08G072400/Glyma.11G048300	17
MF	GO:0004888	transmembrane signaling receptor activity	4/534	62/22279	0.309279	Glyma.18G185400/Glyma.07G183900/Glyma.05G119600/Glyma.05G119500	4
MF	GO:0004551	nucleotide diphosphatase activity	2/534	17/22279	0.309279	Glyma.13G006700/Glyma.20G062000	2
MF	GO:0008083	growth factor activity	2/534	17/22279	0.309279	Glyma.U029600/Glyma.04G217600	2
MF	GO:0016705	oxidoreductase activity, acting on paired donors, with incorporation or reduction of molecular oxygen	17/534	479/22279	0.351601	Glyma.19G144600/Glyma.11G197300/Glyma.07G039800/Glyma.01G153300/Glyma.01G014700/Glyma.15G201100/Glyma.11G093100/Glyma.18G202600/Glyma.09G207400/Glyma.08G212900/Glyma.09G142900/Glyma.09G218600/Glyma.11G051800/Glyma.07G151300/Glyma.14G194300/Glyma.05G042600/Glyma.07G162900	17
MF	GO:0016702	oxidoreductase activity, acting on single donors with incorporation of molecular oxygen, incorporation of two atoms of oxygen	4/534	67/22279	0.376584	Glyma.07G196800/Glyma.13G030300/Glyma.15G026500/Glyma.13G347800	4
MF	GO:0008753	NADPH dehydrogenase (quinone) activity	2/534	21/22279	0.414319	Glyma.11G152400/Glyma.11G120200	2
MF	GO:0030545	signaling receptor regulator activity	2/534	21/22279	0.414319	Glyma.U029600/Glyma.04G217600	2
MF	GO:0030546	signaling receptor activator activity	2/534	21/22279	0.414319	Glyma.U029600/Glyma.04G217600	2
MF	GO:0048018	receptor ligand activity	2/534	21/22279	0.414319	Glyma.U029600/Glyma.04G217600	2
MF	GO:0004364	glutathione transferase activity	4/534	72/22279	0.432156	Glyma.08G174700/Glyma.08G118700/Glyma.01G106000/Glyma.03G176300	4
MF	GO:0016615	malate dehydrogenase activity	2/534	22/22279	0.432156	Glyma.04G086300/Glyma.06G087800	2
MF	GO:0019238	cyclohydrolase activity	2/534	22/22279	0.432156	Glyma.15G055700/Glyma.08G177300	2
MF	GO:0004866	endopeptidase inhibitor activity	4/534	74/22279	0.444107	Glyma.03G068200/Glyma.08G342000/Glyma.16G212500/Glyma.09G163900	4
MF	GO:0030414	peptidase inhibitor activity	4/534	74/22279	0.444107	Glyma.03G068200/Glyma.08G342000/Glyma.16G212500/Glyma.09G163900	4
MF	GO:0061135	endopeptidase regulator activity	4/534	76/22279	0.472003	Glyma.03G068200/Glyma.08G342000/Glyma.16G212500/Glyma.09G163900	4
MF	GO:0019888	protein phosphatase regulator activity	5/534	107/22279	0.485661	Glyma.09G040600/Glyma.17G030400/Glyma.15G145900/Glyma.09G040400/Glyma.07G243900	5
MF	GO:0061134	peptidase regulator activity	4/534	78/22279	0.485661	Glyma.03G068200/Glyma.08G342000/Glyma.16G212500/Glyma.09G163900	4
MF	GO:0003993	acid phosphatase activity	3/534	50/22279	0.485661	Glyma.06G170300/Glyma.13G161900/Glyma.08G200000	3
MF	GO:0019208	phosphatase regulator activity	5/534	108/22279	0.485661	Glyma.09G040600/Glyma.17G030400/Glyma.15G145900/Glyma.09G040400/Glyma.07G243900	5
MF	GO:0015923	mannosidase activity	3/534	51/22279	0.498053	Glyma.06G319500/Glyma.10G154400/Glyma.13G087500	3
MF	GO:0043177	organic acid binding	5/534	110/22279	0.498053	Glyma.09G040600/Glyma.17G030400/Glyma.15G145900/Glyma.09G040400/Glyma.07G243900	5
MF	GO:0016289	CoA hydrolase activity	2/534	26/22279	0.498053	Glyma.07G071300/Glyma.09G236500	2
MF	GO:0016846	carbon-sulfur lyase activity	2/534	26/22279	0.498053	Glyma.02G077600/Glyma.10G172700	2
MF	GO:0140326	ATPase-coupled intramembrane lipid transporter activity	2/534	26/22279	0.498053	Glyma.17G123800/Glyma.05G015400	2
MF	GO:0005388	P-type calcium transporter activity	2/534	27/22279	0.518605	Glyma.01G193600/Glyma.11G048300	2
MF	GO:0140303	intramembrane lipid transporter activity	2/534	27/22279	0.518605	Glyma.17G123800/Glyma.05G015400	2
MF	GO:0030246	carbohydrate binding	10/534	283/22279	0.52784	Glyma.17G214400/Glyma.14G157700/Glyma.07G095900/Glyma.18G185400/Glyma.17G214100/Glyma.02G156800/Glyma.05G237100/Glyma.07G183900/Glyma.07G094500/Glyma.09G181600	10
MF	GO:0004707	MAP kinase activity	2/534	28/22279	0.52784	Glyma.12G073000/Glyma.U021800	2
MF	GO:0032452	histone demethylase activity	2/534	28/22279	0.52784	Glyma.01G014700/Glyma.09G207400	2
MF	GO:0140457	protein demethylase activity	2/534	28/22279	0.52784	Glyma.01G014700/Glyma.09G207400	2
MF	GO:0016701	oxidoreductase activity, acting on single donors with incorporation of molecular oxygen	4/534	85/22279	0.532726	Glyma.07G196800/Glyma.13G030300/Glyma.15G026500/Glyma.13G347800	4
MF	GO:0010181	FMN binding	3/534	56/22279	0.53984	Glyma.19G057500/Glyma.13G109800/Glyma.11G120200	3
MF	GO:0016709	oxidoreductase activity, acting on paired donors, with incorporation or reduction of molecular oxygen, NAD(P)H as one donor, and incorporation of one atom of oxygen	5/534	119/22279	0.560105	Glyma.19G144600/Glyma.11G197300/Glyma.15G201100/Glyma.09G218600/Glyma.11G051800	5
MF	GO:0045735	nutrient reservoir activity	2/534	30/22279	0.566407	Glyma.08G200000/Glyma.08G200100	2
MF	GO:0016645	oxidoreductase activity, acting on the CH-NH group of donors	3/534	59/22279	0.57469	Glyma.10G090700/Glyma.09G225400/Glyma.13G104700	3
MF	GO:0016638	oxidoreductase activity, acting on the CH-NH2 group of donors	2/534	31/22279	0.57469	Glyma.02G072200/Glyma.16G153400	2
MF	GO:0016985	mannan endo-1,4-beta-mannosidase activity	2/534	31/22279	0.57469	Glyma.06G319500/Glyma.13G087500	2
MF	GO:0015291	secondary active transmembrane transporter activity	14/534	438/22279	0.57469	Glyma.04G209200/Glyma.06G019500/Glyma.18G031100/Glyma.09G238100/Glyma.01G216600/Glyma.20G155500/Glyma.11G202000/Glyma.01G161100/Glyma.13G186600/Glyma.02G238500/Glyma.16G142100/Glyma.04G069500/Glyma.15G150300/Glyma.06G088300	14
MF	GO:0005261	cation channel activity	4/534	93/22279	0.617362	Glyma.11G202000/Glyma.12G170500/Glyma.02G238500/Glyma.16G142100	4
MF	GO:0032451	demethylase activity	2/534	33/22279	0.620931	Glyma.01G014700/Glyma.09G207400	2
MF	GO:0016627	oxidoreductase activity, acting on the CH-CH group of donors	4/534	96/22279	0.65345	Glyma.03G098600/Glyma.13G109800/Glyma.11G233900/Glyma.18G023100	4
MF	GO:0019203	carbohydrate phosphatase activity	2/534	35/22279	0.65345	Glyma.08G137500/Glyma.06G318400	2
MF	GO:0015293	symporter activity	5/534	131/22279	0.65345	Glyma.04G209200/Glyma.06G019500/Glyma.09G238100/Glyma.01G161100/Glyma.06G088300	5
MF	GO:0019829	ATPase-coupled cation transmembrane transporter activity	4/534	98/22279	0.65345	Glyma.01G193600/Glyma.05G132900/Glyma.08G072400/Glyma.11G048300	4
MF	GO:0016791	phosphatase activity	15/534	496/22279	0.65345	Glyma.06G170300/Glyma.15G201300/Glyma.13G161900/Glyma.08G137500/Glyma.20G131500/Glyma.12G116800/Glyma.05G080500/Glyma.09G115800/Glyma.07G266200/Glyma.06G318400/Glyma.08G200000/Glyma.17G243100/Glyma.11G243900/Glyma.03G226200/Glyma.14G082200	15
MF	GO:0004143	diacylglycerol kinase activity	1/534	10/22279	0.65345	Glyma.06G254900	1
MF	GO:0005452	inorganic anion exchanger activity	1/534	10/22279	0.65345	Glyma.04G069500	1
MF	GO:0008661	1-deoxy-D-xylulose-5-phosphate synthase activity	1/534	10/22279	0.65345	Glyma.17G066500	1
MF	GO:0016842	amidine-lyase activity	1/534	10/22279	0.65345	Glyma.04G077300	1
MF	GO:0045156	electron transporter, transferring electrons within the cyclic electron transport pathway of photosynthesis activity	1/534	10/22279	0.65345	Glyma.12G215100	1
MF	GO:0106310	protein serine kinase activity	8/534	239/22279	0.65345	Glyma.13G119500/Glyma.12G073000/Glyma.06G110700/Glyma.02G275900/Glyma.16G093900/Glyma.02G288600/Glyma.07G188800/Glyma.U021800	8
MF	GO:0010333	terpene synthase activity	1/534	11/22279	0.695135	Glyma.12G197500	1
MF	GO:0042577	lipid phosphatase activity	1/534	11/22279	0.695135	Glyma.09G115800	1
MF	GO:0000062	fatty-acyl-CoA binding	1/534	12/22279	0.714482	Glyma.17G236700	1
MF	GO:0004435	phosphatidylinositol phospholipase C activity	1/534	12/22279	0.714482	Glyma.18G027300	1
MF	GO:0004629	phospholipase C activity	1/534	12/22279	0.714482	Glyma.18G027300	1
MF	GO:0035250	UDP-galactosyltransferase activity	1/534	12/22279	0.714482	Glyma.10G145300	1
MF	GO:0120227	acyl-CoA binding	1/534	12/22279	0.714482	Glyma.17G236700	1
MF	GO:1901567	fatty acid derivative binding	1/534	12/22279	0.714482	Glyma.17G236700	1
MF	GO:0004725	protein tyrosine phosphatase activity	2/534	42/22279	0.736405	Glyma.11G243900/Glyma.03G226200	2
MF	GO:0004557	alpha-galactosidase activity	1/534	13/22279	0.736405	Glyma.09G273400	1
MF	GO:0008878	glucose-1-phosphate adenylyltransferase activity	1/534	13/22279	0.736405	Glyma.12G042400	1
MF	GO:0016755	aminoacyltransferase activity	1/534	13/22279	0.736405	Glyma.11G235800	1
MF	GO:0052692	raffinose alpha-galactosidase activity	1/534	13/22279	0.736405	Glyma.09G273400	1
MF	GO:0004620	phospholipase activity	3/534	77/22279	0.75915	Glyma.18G027300/Glyma.03G159000/Glyma.01G215100	3
MF	GO:0042910	xenobiotic transmembrane transporter activity	3/534	78/22279	0.760112	Glyma.01G216600/Glyma.20G155500/Glyma.15G150300	3
MF	GO:0047617	acyl-CoA hydrolase activity	1/534	14/22279	0.760112	Glyma.07G071300	1
MF	GO:1901681	sulfur compound binding	2/534	45/22279	0.760112	Glyma.19G210300/Glyma.17G236700	2
MF	GO:0004497	monooxygenase activity	11/534	377/22279	0.760112	Glyma.19G144600/Glyma.11G197300/Glyma.07G039800/Glyma.01G153300/Glyma.15G201100/Glyma.11G093100/Glyma.09G142900/Glyma.09G218600/Glyma.11G051800/Glyma.05G042600/Glyma.07G162900	11
MF	GO:0016814	hydrolase activity, acting on carbon-nitrogen (but not peptide) bonds, in cyclic amidines	2/534	46/22279	0.760112	Glyma.15G055700/Glyma.08G177300	2
MF	GO:0004017	adenylate kinase activity	1/534	15/22279	0.760112	Glyma.16G059400	1
MF	GO:0004024	alcohol dehydrogenase activity, zinc-dependent	1/534	15/22279	0.760112	Glyma.14G121200	1
MF	GO:0008195	phosphatidate phosphatase activity	1/534	15/22279	0.760112	Glyma.09G115800	1
MF	GO:0016174	NAD(P)H oxidase H2O2-forming activity	1/534	15/22279	0.760112	Glyma.03G236300	1
MF	GO:0017022	myosin binding	1/534	15/22279	0.760112	Glyma.16G116200	1
MF	GO:0015079	potassium ion transmembrane transporter activity	3/534	81/22279	0.760112	Glyma.12G170500/Glyma.08G091900/Glyma.13G186600	3
MF	GO:0004144	diacylglycerol O-acyltransferase activity	1/534	16/22279	0.760112	Glyma.09G196400	1
MF	GO:0004427	inorganic diphosphatase activity	1/534	16/22279	0.760112	Glyma.13G132400	1
MF	GO:0046592	polyamine oxidase activity	1/534	16/22279	0.760112	Glyma.10G090700	1
MF	GO:0050664	oxidoreductase activity, acting on NAD(P)H, oxygen as acceptor	1/534	16/22279	0.760112	Glyma.03G236300	1
MF	GO:0051903	S-(hydroxymethyl)glutathione dehydrogenase activity	1/534	16/22279	0.760112	Glyma.14G121200	1
MF	GO:0004659	prenyltransferase activity	2/534	49/22279	0.760112	Glyma.10G295300/Glyma.14G023000	2
MF	GO:0016790	thiolester hydrolase activity	2/534	49/22279	0.760112	Glyma.07G071300/Glyma.09G236500	2
MF	GO:0004022	alcohol dehydrogenase (NAD+) activity	1/534	17/22279	0.760112	Glyma.14G121200	1
MF	GO:0016647	oxidoreductase activity, acting on the CH-NH group of donors, oxygen as acceptor	1/534	17/22279	0.760112	Glyma.10G090700	1
MF	GO:0016778	diphosphotransferase activity	1/534	17/22279	0.760112	Glyma.19G210300	1
MF	GO:0018455	alcohol dehydrogenase [NAD(P)+] activity	1/534	17/22279	0.760112	Glyma.14G121200	1
MF	GO:0035673	oligopeptide transmembrane transporter activity	1/534	17/22279	0.760112	Glyma.20G067300	1
MF	GO:0045505	dynein intermediate chain binding	1/534	17/22279	0.760112	Glyma.13G357500	1
MF	GO:0051959	dynein light intermediate chain binding	1/534	17/22279	0.760112	Glyma.13G357500	1
MF	GO:0052793	pectin acetylesterase activity	1/534	17/22279	0.760112	Glyma.18G179800	1
MF	GO:1904680	peptide transmembrane transporter activity	1/534	17/22279	0.760112	Glyma.20G067300	1
MF	GO:0016765	transferase activity, transferring alkyl or aryl (other than methyl) groups	6/534	199/22279	0.766489	Glyma.08G174700/Glyma.08G118700/Glyma.01G106000/Glyma.10G295300/Glyma.14G023000/Glyma.03G176300	6
MF	GO:0016829	lyase activity	11/534	395/22279	0.775629	Glyma.04G007700/Glyma.02G077600/Glyma.04G077300/Glyma.05G136100/Glyma.11G003500/Glyma.06G182700/Glyma.12G197500/Glyma.05G114000/Glyma.15G055700/Glyma.10G172700/Glyma.08G177300	11
MF	GO:0051287	NAD binding	4/534	125/22279	0.77652	Glyma.13G006700/Glyma.04G086300/Glyma.20G062000/Glyma.06G087800	4
MF	GO:0016838	carbon-oxygen lyase activity, acting on phosphates	1/534	18/22279	0.77652	Glyma.12G197500	1
MF	GO:0015035	protein-disulfide reductase activity	4/534	127/22279	0.791066	Glyma.13G234500/Glyma.15G078600/Glyma.12G207400/Glyma.17G023900	4
MF	GO:0004630	phospholipase D activity	1/534	20/22279	0.823739	Glyma.01G215100	1
MF	GO:0019905	syntaxin binding	1/534	20/22279	0.823739	Glyma.16G116200	1
MF	GO:0070290	N-acylphosphatidylethanolamine-specific phospholipase D activity	1/534	20/22279	0.823739	Glyma.01G215100	1
MF	GO:0015036	disulfide oxidoreductase activity	4/534	132/22279	0.824881	Glyma.13G234500/Glyma.15G078600/Glyma.12G207400/Glyma.17G023900	4
MF	GO:0005543	phospholipid binding	4/534	133/22279	0.824881	Glyma.06G099700/Glyma.15G238500/Glyma.08G136200/Glyma.15G238400	4
MF	GO:0004089	carbonate dehydratase activity	1/534	21/22279	0.824881	Glyma.06G182700	1
MF	GO:0016853	isomerase activity	9/534	332/22279	0.824881	Glyma.10G025500/Glyma.14G098100/Glyma.05G080500/Glyma.08G249900/Glyma.05G008200/Glyma.17G116500/Glyma.18G280900/Glyma.17G226600/Glyma.08G256600	9
MF	GO:0003954	NADH dehydrogenase activity	2/534	58/22279	0.824881	Glyma.11G152400/Glyma.11G120200	2
MF	GO:0050136	NADH dehydrogenase (quinone) activity	2/534	58/22279	0.824881	Glyma.11G152400/Glyma.11G120200	2
MF	GO:0003872	6-phosphofructokinase activity	1/534	22/22279	0.824881	Glyma.08G199800	1
MF	GO:0004520	endodeoxyribonuclease activity	1/534	22/22279	0.824881	Glyma.11G038500	1
MF	GO:0022821	potassium ion antiporter activity	1/534	22/22279	0.824881	Glyma.13G186600	1
MF	GO:0070003	threonine-type peptidase activity	1/534	22/22279	0.824881	Glyma.11G235800	1
MF	GO:0102682	N6-(Delta2-isopentenyl)-adenosine 5'-monophosphate phosphoribohydrolase activity	1/534	22/22279	0.824881	Glyma.02G198300	1
MF	GO:0003955	NAD(P)H dehydrogenase (quinone) activity	2/534	59/22279	0.824881	Glyma.11G152400/Glyma.11G120200	2
MF	GO:0016854	racemase and epimerase activity	2/534	59/22279	0.824881	Glyma.05G008200/Glyma.17G116500	2
MF	GO:0035251	UDP-glucosyltransferase activity	4/534	137/22279	0.824881	Glyma.15G054300/Glyma.01G036000/Glyma.02G029900/Glyma.13G090300	4
MF	GO:0003887	DNA-directed DNA polymerase activity	1/534	23/22279	0.828157	Glyma.01G187400	1
MF	GO:0005249	voltage-gated potassium channel activity	1/534	23/22279	0.828157	Glyma.12G170500	1
MF	GO:0016744	transketolase or transaldolase activity	1/534	23/22279	0.828157	Glyma.17G066500	1
MF	GO:0042887	amide transmembrane transporter activity	1/534	23/22279	0.828157	Glyma.20G067300	1
MF	GO:0016413	O-acetyltransferase activity	3/534	101/22279	0.842018	Glyma.20G110000/Glyma.10G111200/Glyma.11G233100	3
MF	GO:0005216	ion channel activity	5/534	182/22279	0.843833	Glyma.11G202000/Glyma.12G170500/Glyma.02G238500/Glyma.16G142100/Glyma.09G168700	5
MF	GO:0016830	carbon-carbon lyase activity	4/534	142/22279	0.843833	Glyma.04G007700/Glyma.05G136100/Glyma.15G055700/Glyma.08G177300	4
MF	GO:0030170	pyridoxal phosphate binding	4/534	143/22279	0.843833	Glyma.05G136100/Glyma.16G032200/Glyma.11G021500/Glyma.10G172700	4
MF	GO:0070279	vitamin B6 binding	4/534	143/22279	0.843833	Glyma.05G136100/Glyma.16G032200/Glyma.11G021500/Glyma.10G172700	4
MF	GO:0016651	oxidoreductase activity, acting on NAD(P)H	3/534	103/22279	0.843833	Glyma.11G152400/Glyma.11G120200/Glyma.03G236300	3
MF	GO:0003688	DNA replication origin binding	1/534	25/22279	0.848897	Glyma.01G187400	1
MF	GO:0003951	NAD+ kinase activity	1/534	26/22279	0.854319	Glyma.06G254900	1
MF	GO:0015645	fatty acid ligase activity	1/534	26/22279	0.854319	Glyma.11G198300	1
MF	GO:0016780	phosphotransferase activity, for other substituted phosphate groups	1/534	26/22279	0.854319	Glyma.18G192800	1
MF	GO:0016655	oxidoreductase activity, acting on NAD(P)H, quinone or similar compound as acceptor	2/534	67/22279	0.854319	Glyma.11G152400/Glyma.11G120200	2
MF	GO:0005545	1-phosphatidylinositol binding	1/534	27/22279	0.854319	Glyma.06G099700	1
MF	GO:0008443	phosphofructokinase activity	1/534	27/22279	0.854319	Glyma.08G199800	1
MF	GO:0016411	acylglycerol O-acyltransferase activity	1/534	27/22279	0.854319	Glyma.09G196400	1
MF	GO:0016868	intramolecular transferase activity, phosphotransferases	1/534	27/22279	0.854319	Glyma.05G080500	1
MF	GO:0022843	voltage-gated cation channel activity	1/534	28/22279	0.854319	Glyma.12G170500	1
MF	GO:0034061	DNA polymerase activity	1/534	28/22279	0.854319	Glyma.01G187400	1
MF	GO:0050145	nucleoside monophosphate kinase activity	1/534	28/22279	0.854319	Glyma.16G059400	1
MF	GO:0102336	3-oxo-arachidoyl-CoA synthase activity	1/534	28/22279	0.854319	Glyma.04G149300	1
MF	GO:0102337	3-oxo-cerotoyl-CoA synthase activity	1/534	28/22279	0.854319	Glyma.04G149300	1
MF	GO:0102338	3-oxo-lignoceronyl-CoA synthase activity	1/534	28/22279	0.854319	Glyma.04G149300	1
MF	GO:0102756	very-long-chain 3-ketoacyl-CoA synthase activity	1/534	28/22279	0.854319	Glyma.04G149300	1
MF	GO:0000149	SNARE binding	3/534	111/22279	0.856172	Glyma.06G099700/Glyma.02G195300/Glyma.16G116200	3
MF	GO:0015103	inorganic anion transmembrane transporter activity	3/534	111/22279	0.856172	Glyma.18G261900/Glyma.04G069500/Glyma.09G235200	3
MF	GO:0008081	phosphoric diester hydrolase activity	2/534	70/22279	0.856366	Glyma.18G027300/Glyma.01G215100	2
MF	GO:0008810	cellulase activity	1/534	29/22279	0.856366	Glyma.02G293900	1
MF	GO:0016810	hydrolase activity, acting on carbon-nitrogen (but not peptide) bonds	4/534	154/22279	0.856366	Glyma.19G002400/Glyma.08G292000/Glyma.15G055700/Glyma.08G177300	4
MF	GO:0000287	magnesium ion binding	4/534	155/22279	0.859321	Glyma.13G132400/Glyma.17G123800/Glyma.05G015400/Glyma.12G197500	4
MF	GO:0005267	potassium channel activity	1/534	30/22279	0.859321	Glyma.12G170500	1
MF	GO:0019842	vitamin binding	5/534	199/22279	0.859321	Glyma.19G210300/Glyma.05G136100/Glyma.16G032200/Glyma.11G021500/Glyma.10G172700	5
MF	GO:0004499	N,N-dimethylaniline monooxygenase activity	1/534	31/22279	0.859321	Glyma.15G201100	1
MF	GO:0005546	phosphatidylinositol-4,5-bisphosphate binding	1/534	31/22279	0.859321	Glyma.06G099700	1
MF	GO:0008138	protein tyrosine/serine/threonine phosphatase activity	1/534	31/22279	0.859321	Glyma.11G243900	1
MF	GO:0030570	pectate lyase activity	1/534	31/22279	0.859321	Glyma.05G114000	1
MF	GO:0070566	adenylyltransferase activity	1/534	31/22279	0.859321	Glyma.12G042400	1
MF	GO:0016616	oxidoreductase activity, acting on the CH-OH group of donors, NAD or NADP as acceptor	6/534	244/22279	0.859321	Glyma.16G113000/Glyma.07G023700/Glyma.04G086300/Glyma.14G121200/Glyma.06G087800/Glyma.09G196000	6
MF	GO:0016860	intramolecular oxidoreductase activity	2/534	74/22279	0.859321	Glyma.18G280900/Glyma.08G256600	2
MF	GO:0016298	lipase activity	3/534	118/22279	0.859321	Glyma.18G027300/Glyma.03G159000/Glyma.01G215100	3
MF	GO:0019209	kinase activator activity	1/534	32/22279	0.859321	Glyma.05G054600	1
MF	GO:0030295	protein kinase activator activity	1/534	32/22279	0.859321	Glyma.05G054600	1
MF	GO:0016667	oxidoreductase activity, acting on a sulfur group of donors	4/534	161/22279	0.859321	Glyma.13G234500/Glyma.15G078600/Glyma.12G207400/Glyma.17G023900	4
MF	GO:0016835	carbon-oxygen lyase activity	4/534	165/22279	0.876877	Glyma.11G003500/Glyma.06G182700/Glyma.12G197500/Glyma.05G114000	4
MF	GO:0016706	2-oxoglutarate-dependent dioxygenase activity	2/534	78/22279	0.876877	Glyma.01G014700/Glyma.09G207400	2
MF	GO:0016840	carbon-nitrogen lyase activity	1/534	34/22279	0.876877	Glyma.04G077300	1
MF	GO:0032050	clathrin heavy chain binding	1/534	34/22279	0.876877	Glyma.06G099700	1
MF	GO:0016866	intramolecular transferase activity	2/534	79/22279	0.88188	Glyma.05G080500/Glyma.08G249900	2
MF	GO:0016168	chlorophyll binding	1/534	35/22279	0.88188	Glyma.15G179400	1
MF	GO:0043621	protein self-association	1/534	35/22279	0.88188	Glyma.04G108500	1
MF	GO:0003697	single-stranded DNA binding	2/534	81/22279	0.890114	Glyma.11G038500/Glyma.01G187400	2
MF	GO:0016878	acid-thiol ligase activity	1/534	36/22279	0.890114	Glyma.11G198300	1
MF	GO:0005506	iron ion binding	10/534	432/22279	0.896069	Glyma.19G144600/Glyma.11G197300/Glyma.07G039800/Glyma.01G153300/Glyma.11G093100/Glyma.09G142900/Glyma.09G218600/Glyma.11G051800/Glyma.05G042600/Glyma.07G162900	10
MF	GO:0047262	polygalacturonate 4-alpha-galacturonosyltransferase activity	1/534	37/22279	0.897838	Glyma.18G224200	1
MF	GO:0005319	lipid transporter activity	2/534	84/22279	0.901333	Glyma.17G123800/Glyma.05G015400	2
MF	GO:0004536	deoxyribonuclease activity	1/534	38/22279	0.901333	Glyma.11G038500	1
MF	GO:0016837	carbon-oxygen lyase activity, acting on polysaccharides	1/534	38/22279	0.901333	Glyma.05G114000	1
MF	GO:0008374	O-acyltransferase activity	4/534	175/22279	0.904396	Glyma.20G110000/Glyma.10G111200/Glyma.11G233100/Glyma.09G196400	4
MF	GO:0003684	damaged DNA binding	1/534	39/22279	0.904396	Glyma.11G038500	1
MF	GO:1902936	phosphatidylinositol bisphosphate binding	1/534	39/22279	0.904396	Glyma.06G099700	1
MF	GO:0061630	ubiquitin protein ligase activity	5/534	223/22279	0.914673	Glyma.07G097700/Glyma.11G192900/Glyma.12G131800/Glyma.09G180300/Glyma.14G049700	5
MF	GO:0008194	UDP-glycosyltransferase activity	9/534	406/22279	0.930904	Glyma.11G053400/Glyma.10G145300/Glyma.15G054300/Glyma.01G036000/Glyma.08G181000/Glyma.02G029900/Glyma.15G221300/Glyma.18G224200/Glyma.13G090300	9
MF	GO:0061659	ubiquitin-like protein ligase activity	5/534	228/22279	0.930904	Glyma.07G097700/Glyma.11G192900/Glyma.12G131800/Glyma.09G180300/Glyma.14G049700	5
MF	GO:1901981	phosphatidylinositol phosphate binding	1/534	43/22279	0.930904	Glyma.06G099700	1
MF	GO:0004721	phosphoprotein phosphatase activity	5/534	230/22279	0.930904	Glyma.15G201300/Glyma.20G131500/Glyma.12G116800/Glyma.11G243900/Glyma.03G226200	5
MF	GO:0016614	oxidoreductase activity, acting on CH-OH group of donors	6/534	276/22279	0.930904	Glyma.16G113000/Glyma.07G023700/Glyma.04G086300/Glyma.14G121200/Glyma.06G087800/Glyma.09G196000	6
MF	GO:0003779	actin binding	3/534	140/22279	0.930904	Glyma.06G319500/Glyma.14G205100/Glyma.13G087500	3
MF	GO:0051015	actin filament binding	2/534	93/22279	0.930904	Glyma.06G319500/Glyma.13G087500	2
MF	GO:0022853	active ion transmembrane transporter activity	6/534	278/22279	0.930904	Glyma.01G193600/Glyma.05G132900/Glyma.13G186600/Glyma.04G069500/Glyma.08G072400/Glyma.11G048300	6
MF	GO:0050661	NADP binding	2/534	94/22279	0.930904	Glyma.08G064700/Glyma.15G201100	2
MF	GO:0015925	galactosidase activity	1/534	45/22279	0.930904	Glyma.09G273400	1
MF	GO:0016405	CoA-ligase activity	1/534	45/22279	0.930904	Glyma.11G198300	1
MF	GO:0016776	phosphotransferase activity, phosphate group as acceptor	1/534	45/22279	0.930904	Glyma.16G059400	1
MF	GO:0016831	carboxy-lyase activity	2/534	95/22279	0.930904	Glyma.04G007700/Glyma.05G136100	2
MF	GO:0042626	ATPase-coupled transmembrane transporter activity	6/534	281/22279	0.930904	Glyma.01G193600/Glyma.13G043800/Glyma.18G240700/Glyma.05G132900/Glyma.08G072400/Glyma.11G048300	6
MF	GO:0051537	2 iron, 2 sulfur cluster binding	1/534	49/22279	0.965057	Glyma.16G203100	1
MF	GO:0015267	channel activity	5/534	249/22279	0.976952	Glyma.11G202000/Glyma.12G170500/Glyma.02G238500/Glyma.16G142100/Glyma.09G168700	5
MF	GO:0022803	passive transmembrane transporter activity	5/534	249/22279	0.976952	Glyma.11G202000/Glyma.12G170500/Glyma.02G238500/Glyma.16G142100/Glyma.09G168700	5
MF	GO:0016836	hydro-lyase activity	2/534	104/22279	0.976952	Glyma.11G003500/Glyma.06G182700	2
MF	GO:0003712	transcription coregulator activity	4/534	202/22279	0.976952	Glyma.17G038800/Glyma.06G067900/Glyma.05G178200/Glyma.08G135200	4
MF	GO:0004197	cysteine-type endopeptidase activity	2/534	105/22279	0.976952	Glyma.14G092800/Glyma.17G230700	2
MF	GO:0071949	FAD binding	2/534	105/22279	0.976952	Glyma.09G225400/Glyma.13G104700	2
MF	GO:0061631	ubiquitin conjugating enzyme activity	1/534	53/22279	0.977934	Glyma.13G239100	1
MF	GO:0016799	hydrolase activity, hydrolyzing N-glycosyl compounds	1/534	55/22279	0.982855	Glyma.02G198300	1
MF	GO:0019200	carbohydrate kinase activity	1/534	55/22279	0.982855	Glyma.08G199800	1
MF	GO:0004185	serine-type carboxypeptidase activity	1/534	56/22279	0.982855	Glyma.17G244900	1
MF	GO:0019205	nucleobase-containing compound kinase activity	1/534	56/22279	0.982855	Glyma.16G059400	1
MF	GO:0051536	iron-sulfur cluster binding	4/534	212/22279	0.982855	Glyma.12G130000/Glyma.16G203100/Glyma.01G187400/Glyma.19G063100	4
MF	GO:0051540	metal cluster binding	4/534	212/22279	0.982855	Glyma.12G130000/Glyma.16G203100/Glyma.01G187400/Glyma.19G063100	4
MF	GO:0004722	protein serine/threonine phosphatase activity	3/534	163/22279	0.982855	Glyma.15G201300/Glyma.20G131500/Glyma.12G116800	3
MF	GO:0004842	ubiquitin-protein transferase activity	10/534	496/22279	0.982855	Glyma.02G107500/Glyma.20G036400/Glyma.07G097700/Glyma.13G239100/Glyma.14G212200/Glyma.11G192900/Glyma.12G131800/Glyma.09G180300/Glyma.02G234300/Glyma.14G049700	10
MF	GO:0070008	serine-type exopeptidase activity	1/534	58/22279	0.982855	Glyma.17G244900	1
MF	GO:0061650	ubiquitin-like protein conjugating enzyme activity	1/534	59/22279	0.982855	Glyma.13G239100	1
MF	GO:0009055	electron transfer activity	4/534	216/22279	0.982855	Glyma.18G223900/Glyma.13G158200/Glyma.05G169900/Glyma.12G215100	4
MF	GO:0003680	minor groove of adenine-thymine-rich DNA binding	1/534	60/22279	0.982855	Glyma.06G093400	1
MF	GO:0005244	voltage-gated ion channel activity	1/534	61/22279	0.982855	Glyma.12G170500	1
MF	GO:0022832	voltage-gated channel activity	1/534	61/22279	0.982855	Glyma.12G170500	1
MF	GO:0008509	anion transmembrane transporter activity	4/534	220/22279	0.982855	Glyma.18G261900/Glyma.13G186600/Glyma.04G069500/Glyma.09G235200	4
MF	GO:0035091	phosphatidylinositol binding	1/534	63/22279	0.982855	Glyma.06G099700	1
MF	GO:0015297	antiporter activity	5/534	273/22279	0.982855	Glyma.18G031100/Glyma.01G216600/Glyma.20G155500/Glyma.13G186600/Glyma.15G150300	5
MF	GO:0000217	DNA secondary structure binding	1/534	64/22279	0.982855	Glyma.06G093400	1
MF	GO:0005484	SNAP receptor activity	1/534	64/22279	0.982855	Glyma.02G195300	1
MF	GO:0004519	endonuclease activity	2/534	122/22279	0.982855	Glyma.20G116800/Glyma.11G038500	2
MF	GO:0008483	transaminase activity	1/534	65/22279	0.982855	Glyma.02G077600	1
MF	GO:0016769	transferase activity, transferring nitrogenous groups	1/534	65/22279	0.982855	Glyma.02G077600	1
MF	GO:0004540	ribonuclease activity	2/534	123/22279	0.982855	Glyma.20G225200/Glyma.19G245400	2
MF	GO:0004180	carboxypeptidase activity	1/534	66/22279	0.982855	Glyma.17G244900	1
MF	GO:0016877	ligase activity, forming carbon-sulfur bonds	1/534	66/22279	0.982855	Glyma.11G198300	1
MF	GO:0004518	nuclease activity	4/534	228/22279	0.982855	Glyma.20G225200/Glyma.20G116800/Glyma.11G038500/Glyma.19G245400	4
MF	GO:0008171	O-methyltransferase activity	1/534	67/22279	0.982855	Glyma.01G004200	1
MF	GO:0016682	oxidoreductase activity, acting on diphenols and related substances as donors, oxygen as acceptor	1/534	67/22279	0.982855	Glyma.13G076900	1
MF	GO:0051087	chaperone binding	1/534	69/22279	0.990914	Glyma.10G230000	1
MF	GO:0015399	primary active transmembrane transporter activity	6/534	337/22279	0.997494	Glyma.01G193600/Glyma.13G043800/Glyma.18G240700/Glyma.05G132900/Glyma.08G072400/Glyma.11G048300	6
MF	GO:0003899	DNA-directed 5'-3' RNA polymerase activity	1/534	72/22279	0.99861	Glyma.01G187400	1
MF	GO:0015298	solute:cation antiporter activity	1/534	73/22279	0.99861	Glyma.13G186600	1
MF	GO:0016811	hydrolase activity, acting on carbon-nitrogen (but not peptide) bonds, in linear amides	1/534	73/22279	0.99861	Glyma.19G002400	1
MF	GO:0016679	oxidoreductase activity, acting on diphenols and related substances as donors	1/534	75/22279	0.999783	Glyma.13G076900	1
MF	GO:0016763	pentosyltransferase activity	1/534	79/22279	0.999783	Glyma.04G099000	1
MF	GO:0030276	clathrin binding	1/534	79/22279	0.999783	Glyma.06G099700	1
MF	GO:0034062	5'-3' RNA polymerase activity	1/534	79/22279	0.999783	Glyma.01G187400	1
MF	GO:0097747	RNA polymerase activity	1/534	79/22279	0.999783	Glyma.01G187400	1
MF	GO:0016407	acetyltransferase activity	3/534	197/22279	0.999783	Glyma.20G110000/Glyma.10G111200/Glyma.11G233100	3
MF	GO:0106306	protein serine phosphatase activity	2/534	141/22279	0.999783	Glyma.15G201300/Glyma.20G131500	2
MF	GO:0106307	protein threonine phosphatase activity	2/534	141/22279	0.999783	Glyma.15G201300/Glyma.20G131500	2
MF	GO:0016620	oxidoreductase activity, acting on the aldehyde or oxo group of donors, NAD or NADP as acceptor	1/534	80/22279	0.999783	Glyma.08G064700	1
MF	GO:0004222	metalloendopeptidase activity	1/534	83/22279	0.999783	Glyma.01G036900	1
MF	GO:0031625	ubiquitin protein ligase binding	1/534	84/22279	0.999783	Glyma.11G220500	1
MF	GO:0008092	cytoskeletal protein binding	7/534	415/22279	0.999783	Glyma.15G118000/Glyma.06G319500/Glyma.14G205100/Glyma.16G116200/Glyma.07G005200/Glyma.13G087500/Glyma.05G054600	7
MF	GO:0046910	pectinesterase inhibitor activity	1/534	88/22279	0.999783	Glyma.04G236200	1
MF	GO:0044389	ubiquitin-like protein ligase binding	1/534	89/22279	0.999783	Glyma.11G220500	1
MF	GO:0000977	RNA polymerase II transcription regulatory region sequence-specific DNA binding	6/534	375/22279	0.999783	Glyma.04G182600/Glyma.U035800/Glyma.17G245200/Glyma.13G151200/Glyma.12G114300/Glyma.06G291900	6
MF	GO:0050660	flavin adenine dinucleotide binding	3/534	214/22279	0.999783	Glyma.15G201100/Glyma.09G225400/Glyma.13G104700	3
MF	GO:0044877	protein-containing complex binding	4/534	270/22279	0.999783	Glyma.06G319500/Glyma.02G136700/Glyma.13G087500/Glyma.07G208700	4
MF	GO:0008234	cysteine-type peptidase activity	3/534	217/22279	0.999783	Glyma.14G092800/Glyma.17G230700/Glyma.18G281600	3
MF	GO:0030674	protein-macromolecule adaptor activity	1/534	97/22279	0.999783	Glyma.02G195300	1
MF	GO:0045330	aspartyl esterase activity	1/534	97/22279	0.999783	Glyma.04G236200	1
MF	GO:0140101	catalytic activity, acting on a tRNA	2/534	167/22279	0.999783	Glyma.08G064700/Glyma.04G099000	2
MF	GO:0008238	exopeptidase activity	1/534	101/22279	0.999783	Glyma.17G244900	1
MF	GO:0052689	carboxylic ester hydrolase activity	3/534	229/22279	0.999783	Glyma.04G236200/Glyma.07G097000/Glyma.18G179800	3
MF	GO:0016903	oxidoreductase activity, acting on the aldehyde or oxo group of donors	1/534	102/22279	0.999783	Glyma.08G064700	1
MF	GO:0060090	molecular adaptor activity	1/534	105/22279	0.999783	Glyma.02G195300	1
MF	GO:0003682	chromatin binding	2/534	175/22279	0.999783	Glyma.01G187400/Glyma.13G362500	2
MF	GO:0022836	gated channel activity	1/534	107/22279	0.999783	Glyma.12G170500	1
MF	GO:0008017	microtubule binding	3/534	240/22279	0.999783	Glyma.15G118000/Glyma.07G005200/Glyma.05G054600	3
MF	GO:0008242	omega peptidase activity	1/534	111/22279	0.999783	Glyma.11G235800	1
MF	GO:0030599	pectinesterase activity	1/534	112/22279	0.999783	Glyma.04G236200	1
MF	GO:0019887	protein kinase regulator activity	1/534	114/22279	0.999783	Glyma.05G054600	1
MF	GO:0033218	amide binding	1/534	116/22279	0.999783	Glyma.17G236700	1
MF	GO:0015631	tubulin binding	3/534	260/22279	0.999783	Glyma.15G118000/Glyma.07G005200/Glyma.05G054600	3
MF	GO:0019207	kinase regulator activity	1/534	124/22279	0.999783	Glyma.05G054600	1
MF	GO:0005096	GTPase activator activity	1/534	125/22279	0.999783	Glyma.16G116200	1
MF	GO:0016779	nucleotidyltransferase activity	2/534	199/22279	0.999783	Glyma.01G187400/Glyma.12G042400	2
MF	GO:0000981	DNA-binding transcription factor activity, RNA polymerase II-specific	6/534	444/22279	0.999783	Glyma.18G253800/Glyma.04G182600/Glyma.U035800/Glyma.17G245200/Glyma.12G114300/Glyma.06G291900	6
MF	GO:0051539	4 iron, 4 sulfur cluster binding	1/534	135/22279	0.999783	Glyma.01G187400	1
MF	GO:0004857	enzyme inhibitor activity	1/534	139/22279	0.999783	Glyma.04G236200	1
MF	GO:0140678	molecular function inhibitor activity	1/534	139/22279	0.999783	Glyma.04G236200	1
MF	GO:0140097	catalytic activity, acting on DNA	2/534	218/22279	0.999783	Glyma.11G038500/Glyma.01G187400	2
MF	GO:0008237	metallopeptidase activity	1/534	146/22279	0.999783	Glyma.01G036900	1
MF	GO:0030695	GTPase regulator activity	1/534	146/22279	0.999783	Glyma.16G116200	1
MF	GO:0060589	nucleoside-triphosphatase regulator activity	1/534	146/22279	0.999783	Glyma.16G116200	1
MF	GO:0008236	serine-type peptidase activity	2/534	232/22279	0.999783	Glyma.17G244900/Glyma.14G222700	2
MF	GO:0017171	serine hydrolase activity	2/534	232/22279	0.999783	Glyma.17G244900/Glyma.14G222700	2
MF	GO:0004252	serine-type endopeptidase activity	1/534	155/22279	0.999783	Glyma.14G222700	1
MF	GO:0051082	unfolded protein binding	1/534	182/22279	0.999783	Glyma.04G108500	1
MF	GO:0140098	catalytic activity, acting on RNA	5/534	498/22279	0.999783	Glyma.20G225200/Glyma.08G064700/Glyma.04G099000/Glyma.01G187400/Glyma.19G245400	5
MF	GO:0008757	S-adenosylmethionine-dependent methyltransferase activity	1/534	211/22279	0.999783	Glyma.01G004200	1
MF	GO:0005525	GTP binding	3/534	400/22279	0.999783	Glyma.18G102400/Glyma.15G055700/Glyma.08G177300	3
MF	GO:0032561	guanyl ribonucleotide binding	3/534	400/22279	0.999783	Glyma.18G102400/Glyma.15G055700/Glyma.08G177300	3
MF	GO:0000978	RNA polymerase II cis-regulatory region sequence-specific DNA binding	2/534	327/22279	0.999783	Glyma.17G245200/Glyma.13G151200	2
MF	GO:0000987	cis-regulatory region sequence-specific DNA binding	2/534	331/22279	0.999783	Glyma.17G245200/Glyma.13G151200	2
MF	GO:0019001	guanyl nucleotide binding	3/534	411/22279	0.999783	Glyma.18G102400/Glyma.15G055700/Glyma.08G177300	3
MF	GO:0008168	methyltransferase activity	3/534	423/22279	0.999783	Glyma.01G004200/Glyma.19G181000/Glyma.16G197200	3
MF	GO:0016741	transferase activity, transferring one-carbon groups	3/534	446/22279	0.999783	Glyma.01G004200/Glyma.19G181000/Glyma.16G197200	3
MF	GO:0003924	GTPase activity	1/534	295/22279	0.999783	Glyma.18G102400	1
MF	GO:0016874	ligase activity	1/534	295/22279	0.999783	Glyma.11G198300	1
MF	GO:0019899	enzyme binding	1/534	336/22279	0.999783	Glyma.11G220500	1
MF	GO:0003729	mRNA binding	1/534	345/22279	0.999783	Glyma.04G098600	1

## Sheet: Only JY93E_JY93 UP
GO enrichment analysis of the up-regulated DEGs between two JY93E and JY93
ONTOLOGY	ID	Description	GeneRatio	BgRatio	p.adjust	geneID	Count
BP	GO:0009812	flavonoid metabolic process	10/483	27/16967	7.88341e-07	Glyma.12G067000/Glyma.20G241700/Glyma.09G075200/Glyma.14G072700/Glyma.01G239600/Glyma.01G091400/Glyma.10G292200/Glyma.08G110500/Glyma.19G105100/Glyma.20G241600	10
BP	GO:0009813	flavonoid biosynthetic process	10/483	27/16967	7.88341e-07	Glyma.12G067000/Glyma.20G241700/Glyma.09G075200/Glyma.14G072700/Glyma.01G239600/Glyma.01G091400/Glyma.10G292200/Glyma.08G110500/Glyma.19G105100/Glyma.20G241600	10
BP	GO:0009607	response to biotic stimulus	24/483	250/16967	6.5081e-05	Glyma.07G243600/Glyma.13G094100/Glyma.19G015300/Glyma.15G145600/Glyma.13G094200/Glyma.05G099300/Glyma.18G191800/Glyma.13G234400/Glyma.03G051100/Glyma.09G040500/Glyma.15G062400/Glyma.09G150500/Glyma.13G068800/Glyma.07G243500/Glyma.16G145500/Glyma.06G035300/Glyma.09G196800/Glyma.05G196900/Glyma.07G141500/Glyma.18G152400/Glyma.18G294400/Glyma.13G285300/Glyma.03G247500/Glyma.02G042500	24
BP	GO:0006979	response to oxidative stress	23/483	265/16967	0.000506857	Glyma.19G011400/Glyma.11G101200/Glyma.08G068700/Glyma.06G145300/Glyma.11G161600/Glyma.06G157800/Glyma.04G220600/Glyma.20G169200/Glyma.02G127300/Glyma.12G073100/Glyma.07G263000/Glyma.09G277800/Glyma.07G200200/Glyma.05G003900/Glyma.07G200700/Glyma.14G215400/Glyma.13G176200/Glyma.14G100000/Glyma.17G177800/Glyma.19G011700/Glyma.09G277900/Glyma.15G128700/Glyma.02G135100	23
BP	GO:0019748	secondary metabolic process	14/483	125/16967	0.00235094	Glyma.13G173500/Glyma.14G062300/Glyma.09G075200/Glyma.03G070300/Glyma.11G137500/Glyma.01G239600/Glyma.14G198900/Glyma.01G091400/Glyma.08G110500/Glyma.02G309300/Glyma.14G205200/Glyma.02G236500/Glyma.02G231600/Glyma.19G105100	14
BP	GO:0042542	response to hydrogen peroxide	7/483	38/16967	0.0101922	Glyma.19G011400/Glyma.08G068700/Glyma.06G157800/Glyma.07G200200/Glyma.07G200700/Glyma.13G176200/Glyma.14G100000	7
BP	GO:0009737	response to abscisic acid	12/483	113/16967	0.0101922	Glyma.07G243600/Glyma.07G139700/Glyma.16G189900/Glyma.06G204100/Glyma.15G145600/Glyma.08G008600/Glyma.01G060300/Glyma.09G040500/Glyma.05G003900/Glyma.02G118500/Glyma.07G243500/Glyma.03G213300	12
BP	GO:0097305	response to alcohol	12/483	113/16967	0.0101922	Glyma.07G243600/Glyma.07G139700/Glyma.16G189900/Glyma.06G204100/Glyma.15G145600/Glyma.08G008600/Glyma.01G060300/Glyma.09G040500/Glyma.05G003900/Glyma.02G118500/Glyma.07G243500/Glyma.03G213300	12
BP	GO:0044550	secondary metabolite biosynthetic process	7/483	39/16967	0.0101922	Glyma.13G173500/Glyma.09G075200/Glyma.01G239600/Glyma.01G091400/Glyma.08G110500/Glyma.02G309300/Glyma.19G105100	7
BP	GO:0051259	protein complex oligomerization	7/483	41/16967	0.0127654	Glyma.19G011400/Glyma.08G068700/Glyma.06G157800/Glyma.07G200200/Glyma.07G200700/Glyma.13G176200/Glyma.14G100000	7
BP	GO:0030638	polyketide metabolic process	4/483	11/16967	0.0137818	Glyma.09G075200/Glyma.01G091400/Glyma.08G110500/Glyma.19G105100	4
BP	GO:0030639	polyketide biosynthetic process	4/483	11/16967	0.0137818	Glyma.09G075200/Glyma.01G091400/Glyma.08G110500/Glyma.19G105100	4
BP	GO:0009408	response to heat	10/483	91/16967	0.0181269	Glyma.19G011400/Glyma.07G139700/Glyma.08G068700/Glyma.16G178800/Glyma.06G157800/Glyma.07G200200/Glyma.07G200700/Glyma.13G176200/Glyma.14G100000/Glyma.18G010500	10
BP	GO:0009698	phenylpropanoid metabolic process	9/483	80/16967	0.0234362	Glyma.13G173500/Glyma.14G062300/Glyma.11G137500/Glyma.01G239600/Glyma.14G198900/Glyma.02G309300/Glyma.14G205200/Glyma.02G236500/Glyma.02G231600	9
BP	GO:0009651	response to salt stress	8/483	64/16967	0.0234362	Glyma.19G011400/Glyma.08G068700/Glyma.06G157800/Glyma.07G200200/Glyma.07G200700/Glyma.13G176200/Glyma.14G100000/Glyma.03G213300	8
BP	GO:0042743	hydrogen peroxide metabolic process	13/483	156/16967	0.0234362	Glyma.11G101200/Glyma.06G145300/Glyma.11G161600/Glyma.04G220600/Glyma.20G169200/Glyma.02G127300/Glyma.12G073100/Glyma.07G263000/Glyma.09G277800/Glyma.17G177800/Glyma.09G277900/Glyma.15G128700/Glyma.02G135100	13
BP	GO:0042744	hydrogen peroxide catabolic process	13/483	156/16967	0.0234362	Glyma.11G101200/Glyma.06G145300/Glyma.11G161600/Glyma.04G220600/Glyma.20G169200/Glyma.02G127300/Glyma.12G073100/Glyma.07G263000/Glyma.09G277800/Glyma.17G177800/Glyma.09G277900/Glyma.15G128700/Glyma.02G135100	13
BP	GO:0031407	oxylipin metabolic process	6/483	37/16967	0.0234362	Glyma.03G264300/Glyma.17G049900/Glyma.07G034900/Glyma.19G263300/Glyma.03G237300/Glyma.15G026400	6
BP	GO:0031408	oxylipin biosynthetic process	6/483	37/16967	0.0234362	Glyma.03G264300/Glyma.17G049900/Glyma.07G034900/Glyma.19G263300/Glyma.03G237300/Glyma.15G026400	6
BP	GO:0002376	immune system process	15/483	200/16967	0.0234362	Glyma.19G015300/Glyma.05G099300/Glyma.18G191800/Glyma.03G051100/Glyma.09G040500/Glyma.09G150500/Glyma.13G068800/Glyma.06G035300/Glyma.05G196900/Glyma.07G141500/Glyma.18G152400/Glyma.18G294400/Glyma.13G285300/Glyma.03G247500/Glyma.02G042500	15
BP	GO:0006955	immune response	15/483	200/16967	0.0234362	Glyma.19G015300/Glyma.05G099300/Glyma.18G191800/Glyma.03G051100/Glyma.09G040500/Glyma.09G150500/Glyma.13G068800/Glyma.06G035300/Glyma.05G196900/Glyma.07G141500/Glyma.18G152400/Glyma.18G294400/Glyma.13G285300/Glyma.03G247500/Glyma.02G042500	15
BP	GO:0098542	defense response to other organism	15/483	200/16967	0.0234362	Glyma.19G015300/Glyma.05G099300/Glyma.18G191800/Glyma.03G051100/Glyma.09G040500/Glyma.09G150500/Glyma.13G068800/Glyma.06G035300/Glyma.05G196900/Glyma.07G141500/Glyma.18G152400/Glyma.18G294400/Glyma.13G285300/Glyma.03G247500/Glyma.02G042500	15
BP	GO:0043207	response to external biotic stimulus	15/483	201/16967	0.0234362	Glyma.19G015300/Glyma.05G099300/Glyma.18G191800/Glyma.03G051100/Glyma.09G040500/Glyma.09G150500/Glyma.13G068800/Glyma.06G035300/Glyma.05G196900/Glyma.07G141500/Glyma.18G152400/Glyma.18G294400/Glyma.13G285300/Glyma.03G247500/Glyma.02G042500	15
BP	GO:0051707	response to other organism	15/483	201/16967	0.0234362	Glyma.19G015300/Glyma.05G099300/Glyma.18G191800/Glyma.03G051100/Glyma.09G040500/Glyma.09G150500/Glyma.13G068800/Glyma.06G035300/Glyma.05G196900/Glyma.07G141500/Glyma.18G152400/Glyma.18G294400/Glyma.13G285300/Glyma.03G247500/Glyma.02G042500	15
BP	GO:0000302	response to reactive oxygen species	8/483	68/16967	0.0234362	Glyma.19G011400/Glyma.08G068700/Glyma.06G157800/Glyma.12G073100/Glyma.07G200200/Glyma.07G200700/Glyma.13G176200/Glyma.14G100000	8
BP	GO:0006970	response to osmotic stress	8/483	68/16967	0.0234362	Glyma.19G011400/Glyma.08G068700/Glyma.06G157800/Glyma.07G200200/Glyma.07G200700/Glyma.13G176200/Glyma.14G100000/Glyma.03G213300	8
BP	GO:1901700	response to oxygen-containing compound	23/483	385/16967	0.0236226	Glyma.07G243600/Glyma.19G011400/Glyma.07G139700/Glyma.08G068700/Glyma.14G156400/Glyma.16G189900/Glyma.06G204100/Glyma.15G145600/Glyma.08G008600/Glyma.18G141900/Glyma.06G157800/Glyma.01G060300/Glyma.09G040500/Glyma.12G073100/Glyma.07G200200/Glyma.05G003900/Glyma.07G200700/Glyma.02G118500/Glyma.07G243500/Glyma.13G176200/Glyma.14G100000/Glyma.05G196900/Glyma.03G213300	23
BP	GO:0032787	monocarboxylic acid metabolic process	24/483	411/16967	0.0242001	Glyma.16G109300/Glyma.11G111400/Glyma.02G203300/Glyma.19G038400/Glyma.11G247600/Glyma.08G204300/Glyma.18G099500/Glyma.09G262900/Glyma.03G264300/Glyma.09G153900/Glyma.17G049900/Glyma.19G017200/Glyma.02G309300/Glyma.07G034900/Glyma.19G263300/Glyma.03G147700/Glyma.04G104500/Glyma.15G019300/Glyma.19G009000/Glyma.20G210900/Glyma.09G138100/Glyma.06G105600/Glyma.03G237300/Glyma.15G026400	24
BP	GO:0044419	biological process involved in interspecies interaction between organisms	15/483	210/16967	0.031975	Glyma.19G015300/Glyma.05G099300/Glyma.18G191800/Glyma.03G051100/Glyma.09G040500/Glyma.09G150500/Glyma.13G068800/Glyma.06G035300/Glyma.05G196900/Glyma.07G141500/Glyma.18G152400/Glyma.18G294400/Glyma.13G285300/Glyma.03G247500/Glyma.02G042500	15
BP	GO:0072593	reactive oxygen species metabolic process	13/483	168/16967	0.031975	Glyma.11G101200/Glyma.06G145300/Glyma.11G161600/Glyma.04G220600/Glyma.20G169200/Glyma.02G127300/Glyma.12G073100/Glyma.07G263000/Glyma.09G277800/Glyma.17G177800/Glyma.09G277900/Glyma.15G128700/Glyma.02G135100	13
BP	GO:0009628	response to abiotic stimulus	24/483	433/16967	0.044479	Glyma.19G011400/Glyma.07G139700/Glyma.08G068700/Glyma.13G276700/Glyma.16G178800/Glyma.10G136300/Glyma.14G193200/Glyma.06G157800/Glyma.20G085900/Glyma.12G224600/Glyma.13G218200/Glyma.13G082300/Glyma.07G200200/Glyma.03G081700/Glyma.06G055400/Glyma.19G165300/Glyma.05G003900/Glyma.11G074900/Glyma.07G200700/Glyma.13G176200/Glyma.14G100000/Glyma.02G226300/Glyma.03G213300/Glyma.18G010500	24
BP	GO:0030705	cytoskeleton-dependent intracellular transport	5/483	32/16967	0.0552993	Glyma.08G161500/Glyma.15G256400/Glyma.03G237800/Glyma.10G286300/Glyma.15G266300	5
BP	GO:0010035	response to inorganic substance	10/483	124/16967	0.0790489	Glyma.19G011400/Glyma.07G139700/Glyma.08G068700/Glyma.18G141900/Glyma.06G157800/Glyma.07G200200/Glyma.05G003900/Glyma.07G200700/Glyma.13G176200/Glyma.14G100000	10
BP	GO:0009266	response to temperature stimulus	10/483	126/16967	0.0861616	Glyma.19G011400/Glyma.07G139700/Glyma.08G068700/Glyma.16G178800/Glyma.06G157800/Glyma.07G200200/Glyma.07G200700/Glyma.13G176200/Glyma.14G100000/Glyma.18G010500	10
BP	GO:0033319	UDP-D-xylose metabolic process	3/483	12/16967	0.104511	Glyma.17G027300/Glyma.10G018400/Glyma.19G211300	3
BP	GO:0033320	UDP-D-xylose biosynthetic process	3/483	12/16967	0.104511	Glyma.17G027300/Glyma.10G018400/Glyma.19G211300	3
BP	GO:0016246	RNA interference	4/483	24/16967	0.104511	Glyma.09G025400/Glyma.03G262100/Glyma.19G261200/Glyma.17G104100	4
BP	GO:0030422	production of siRNA involved in RNA interference	4/483	24/16967	0.104511	Glyma.09G025400/Glyma.03G262100/Glyma.19G261200/Glyma.17G104100	4
BP	GO:0046394	carboxylic acid biosynthetic process	24/483	475/16967	0.114323	Glyma.08G047800/Glyma.05G152100/Glyma.06G169700/Glyma.02G203300/Glyma.04G049200/Glyma.03G264300/Glyma.13G001200/Glyma.17G049900/Glyma.02G309300/Glyma.07G034900/Glyma.12G181800/Glyma.02G208400/Glyma.19G263300/Glyma.16G019900/Glyma.10G261400/Glyma.18G061100/Glyma.03G147700/Glyma.11G170300/Glyma.05G022600/Glyma.16G038300/Glyma.20G210900/Glyma.16G034300/Glyma.03G237300/Glyma.15G026400	24
BP	GO:0009664	plant-type cell wall organization	7/483	74/16967	0.114323	Glyma.13G336600/Glyma.07G229000/Glyma.18G260900/Glyma.04G021600/Glyma.02G248500/Glyma.07G132600/Glyma.11G139100	7
BP	GO:0009808	lignin metabolic process	6/483	57/16967	0.121191	Glyma.14G062300/Glyma.11G137500/Glyma.14G198900/Glyma.14G205200/Glyma.02G236500/Glyma.02G231600	6
BP	GO:0007188	adenylate cyclase-modulating G protein-coupled receptor signaling pathway	3/483	14/16967	0.139132	Glyma.15G262600/Glyma.17G226700/Glyma.14G098000	3
BP	GO:0042732	D-xylose metabolic process	3/483	14/16967	0.139132	Glyma.17G027300/Glyma.10G018400/Glyma.19G211300	3
BP	GO:0019321	pentose metabolic process	4/483	28/16967	0.159033	Glyma.19G124600/Glyma.17G027300/Glyma.10G018400/Glyma.19G211300	4
BP	GO:0016053	organic acid biosynthetic process	24/483	496/16967	0.167359	Glyma.08G047800/Glyma.05G152100/Glyma.06G169700/Glyma.02G203300/Glyma.04G049200/Glyma.03G264300/Glyma.13G001200/Glyma.17G049900/Glyma.02G309300/Glyma.07G034900/Glyma.12G181800/Glyma.02G208400/Glyma.19G263300/Glyma.16G019900/Glyma.10G261400/Glyma.18G061100/Glyma.03G147700/Glyma.11G170300/Glyma.05G022600/Glyma.16G038300/Glyma.20G210900/Glyma.16G034300/Glyma.03G237300/Glyma.15G026400	24
BP	GO:0006928	movement of cell or subcellular component	10/483	147/16967	0.185049	Glyma.08G161500/Glyma.03G217000/Glyma.15G256400/Glyma.03G237800/Glyma.01G168200/Glyma.10G286300/Glyma.05G085400/Glyma.14G085200/Glyma.05G149700/Glyma.15G266300	10
BP	GO:0048511	rhythmic process	6/483	64/16967	0.185049	Glyma.08G179400/Glyma.13G191900/Glyma.03G261300/Glyma.13G199300/Glyma.04G133400/Glyma.15G229400	6
BP	GO:0140115	export across plasma membrane	4/483	30/16967	0.186611	Glyma.14G134100/Glyma.18G277600/Glyma.03G262600/Glyma.17G061800	4
BP	GO:0032259	methylation	17/483	325/16967	0.223557	Glyma.05G152100/Glyma.01G175300/Glyma.09G213100/Glyma.11G232400/Glyma.09G094600/Glyma.09G281800/Glyma.10G292500/Glyma.06G137100/Glyma.04G227700/Glyma.01G046700/Glyma.07G048900/Glyma.16G038300/Glyma.08G001200/Glyma.14G018100/Glyma.01G187700/Glyma.02G103500/Glyma.14G201100	17
BP	GO:0043648	dicarboxylic acid metabolic process	8/483	110/16967	0.236067	Glyma.08G091500/Glyma.08G047800/Glyma.05G152100/Glyma.09G262900/Glyma.05G042400/Glyma.02G208400/Glyma.15G019300/Glyma.16G034300	8
BP	GO:0007623	circadian rhythm	5/483	50/16967	0.236067	Glyma.08G179400/Glyma.13G191900/Glyma.13G199300/Glyma.04G133400/Glyma.15G229400	5
BP	GO:0031050	dsRNA processing	4/483	33/16967	0.236067	Glyma.09G025400/Glyma.03G262100/Glyma.19G261200/Glyma.17G104100	4
BP	GO:0070918	production of small RNA involved in gene silencing by RNA	4/483	33/16967	0.236067	Glyma.09G025400/Glyma.03G262100/Glyma.19G261200/Glyma.17G104100	4
BP	GO:0009081	branched-chain amino acid metabolic process	4/483	34/16967	0.247653	Glyma.08G047800/Glyma.06G169700/Glyma.04G049200/Glyma.06G120300	4
BP	GO:0035194	post-transcriptional gene silencing by RNA	4/483	34/16967	0.247653	Glyma.09G025400/Glyma.03G262100/Glyma.19G261200/Glyma.17G104100	4
BP	GO:0080163	regulation of protein serine/threonine phosphatase activity	4/483	34/16967	0.247653	Glyma.07G243600/Glyma.15G145600/Glyma.09G040500/Glyma.07G243500	4
BP	GO:0005992	trehalose biosynthetic process	3/483	19/16967	0.251506	Glyma.09G231400/Glyma.04G180900/Glyma.14G171700	3
BP	GO:0006090	pyruvate metabolic process	8/483	114/16967	0.253283	Glyma.11G111400/Glyma.11G247600/Glyma.09G262900/Glyma.09G153900/Glyma.19G017200/Glyma.04G104500/Glyma.15G019300/Glyma.06G105600	8
BP	GO:0009640	photomorphogenesis	4/483	35/16967	0.255247	Glyma.13G276700/Glyma.12G224600/Glyma.03G081700/Glyma.11G074900	4
BP	GO:0016441	posttranscriptional gene silencing	4/483	35/16967	0.255247	Glyma.09G025400/Glyma.03G262100/Glyma.19G261200/Glyma.17G104100	4
BP	GO:0005991	trehalose metabolic process	3/483	20/16967	0.266388	Glyma.09G231400/Glyma.04G180900/Glyma.14G171700	3
BP	GO:0120029	proton export across plasma membrane	3/483	20/16967	0.266388	Glyma.14G134100/Glyma.03G262600/Glyma.17G061800	3
BP	GO:0033993	response to lipid	12/483	215/16967	0.2947	Glyma.07G243600/Glyma.07G139700/Glyma.16G189900/Glyma.06G204100/Glyma.15G145600/Glyma.08G008600/Glyma.01G060300/Glyma.09G040500/Glyma.05G003900/Glyma.02G118500/Glyma.07G243500/Glyma.03G213300	12
BP	GO:0009699	phenylpropanoid biosynthetic process	3/483	21/16967	0.294843	Glyma.13G173500/Glyma.01G239600/Glyma.02G309300	3
BP	GO:0030048	actin filament-based movement	3/483	22/16967	0.314676	Glyma.08G161500/Glyma.10G286300/Glyma.15G266300	3
BP	GO:0030050	vesicle transport along actin filament	3/483	22/16967	0.314676	Glyma.08G161500/Glyma.10G286300/Glyma.15G266300	3
BP	GO:0099515	actin filament-based transport	3/483	22/16967	0.314676	Glyma.08G161500/Glyma.10G286300/Glyma.15G266300	3
BP	GO:0099518	vesicle cytoskeletal trafficking	3/483	22/16967	0.314676	Glyma.08G161500/Glyma.10G286300/Glyma.15G266300	3
BP	GO:0030258	lipid modification	8/483	124/16967	0.334325	Glyma.20G170500/Glyma.03G264300/Glyma.07G107000/Glyma.07G034900/Glyma.08G241500/Glyma.19G263300/Glyma.03G237300/Glyma.15G026400	8
BP	GO:0045892	negative regulation of transcription, DNA-templated	7/483	104/16967	0.365174	Glyma.06G204100/Glyma.04G214600/Glyma.15G014500/Glyma.01G060300/Glyma.03G084300/Glyma.02G118500/Glyma.06G151500	7
BP	GO:1902679	negative regulation of RNA biosynthetic process	7/483	104/16967	0.365174	Glyma.06G204100/Glyma.04G214600/Glyma.15G014500/Glyma.01G060300/Glyma.03G084300/Glyma.02G118500/Glyma.06G151500	7
BP	GO:1903507	negative regulation of nucleic acid-templated transcription	7/483	104/16967	0.365174	Glyma.06G204100/Glyma.04G214600/Glyma.15G014500/Glyma.01G060300/Glyma.03G084300/Glyma.02G118500/Glyma.06G151500	7
BP	GO:0009225	nucleotide-sugar metabolic process	5/483	62/16967	0.38771	Glyma.17G027300/Glyma.10G018400/Glyma.19G211300/Glyma.05G022600/Glyma.18G272200	5
BP	GO:0006457	protein folding	14/483	282/16967	0.38771	Glyma.19G011400/Glyma.08G068700/Glyma.16G178800/Glyma.11G146800/Glyma.05G149900/Glyma.06G157800/Glyma.03G086200/Glyma.18G127500/Glyma.02G305600/Glyma.07G200200/Glyma.07G200700/Glyma.13G176200/Glyma.14G100000/Glyma.20G017200	14
BP	GO:0008037	cell recognition	6/483	85/16967	0.404718	Glyma.12G140200/Glyma.13G303800/Glyma.15G064900/Glyma.13G248900/Glyma.06G258200/Glyma.03G054900	6
BP	GO:0048544	recognition of pollen	6/483	85/16967	0.404718	Glyma.12G140200/Glyma.13G303800/Glyma.15G064900/Glyma.13G248900/Glyma.06G258200/Glyma.03G054900	6
BP	GO:0051253	negative regulation of RNA metabolic process	7/483	108/16967	0.404718	Glyma.06G204100/Glyma.04G214600/Glyma.15G014500/Glyma.01G060300/Glyma.03G084300/Glyma.02G118500/Glyma.06G151500	7
BP	GO:0009416	response to light stimulus	11/483	207/16967	0.404718	Glyma.13G276700/Glyma.10G136300/Glyma.14G193200/Glyma.20G085900/Glyma.12G224600/Glyma.13G218200/Glyma.13G082300/Glyma.03G081700/Glyma.19G165300/Glyma.11G074900/Glyma.02G226300	11
BP	GO:0006022	aminoglycan metabolic process	3/483	26/16967	0.404718	Glyma.17G217000/Glyma.05G022600/Glyma.02G042500	3
BP	GO:0010268	brassinosteroid homeostasis	3/483	26/16967	0.404718	Glyma.17G118100/Glyma.01G175500/Glyma.16G133800	3
BP	GO:0009066	aspartate family amino acid metabolic process	5/483	65/16967	0.404718	Glyma.08G047800/Glyma.05G042400/Glyma.18G061100/Glyma.11G170300/Glyma.16G038300	5
BP	GO:0006549	isoleucine metabolic process	2/483	11/16967	0.404718	Glyma.08G047800/Glyma.06G169700	2
BP	GO:0009097	isoleucine biosynthetic process	2/483	11/16967	0.404718	Glyma.08G047800/Glyma.06G169700	2
BP	GO:0009435	NAD biosynthetic process	2/483	11/16967	0.404718	Glyma.17G150300/Glyma.05G042400	2
BP	GO:0043666	regulation of phosphoprotein phosphatase activity	4/483	45/16967	0.404945	Glyma.07G243600/Glyma.15G145600/Glyma.09G040500/Glyma.07G243500	4
BP	GO:0008202	steroid metabolic process	7/483	111/16967	0.404945	Glyma.16G109300/Glyma.17G118100/Glyma.13G253100/Glyma.17G069100/Glyma.01G175500/Glyma.16G133800/Glyma.15G061800	7
BP	GO:0009875	pollen-pistil interaction	6/483	88/16967	0.404945	Glyma.12G140200/Glyma.13G303800/Glyma.15G064900/Glyma.13G248900/Glyma.06G258200/Glyma.03G054900	6
BP	GO:0034440	lipid oxidation	5/483	66/16967	0.404945	Glyma.03G264300/Glyma.07G034900/Glyma.19G263300/Glyma.03G237300/Glyma.15G026400	5
BP	GO:0045229	external encapsulating structure organization	17/483	374/16967	0.404945	Glyma.11G253900/Glyma.13G336600/Glyma.08G309900/Glyma.07G229000/Glyma.18G260900/Glyma.04G021600/Glyma.02G068900/Glyma.01G196800/Glyma.02G248500/Glyma.09G062600/Glyma.15G184400/Glyma.02G215700/Glyma.20G141800/Glyma.07G132600/Glyma.11G139100/Glyma.02G028200/Glyma.16G107300	17
BP	GO:0009082	branched-chain amino acid biosynthetic process	3/483	27/16967	0.404945	Glyma.08G047800/Glyma.06G169700/Glyma.04G049200	3
BP	GO:0046271	phenylpropanoid catabolic process	4/483	46/16967	0.404945	Glyma.14G062300/Glyma.11G137500/Glyma.14G198900/Glyma.02G231600	4
BP	GO:0046274	lignin catabolic process	4/483	46/16967	0.404945	Glyma.14G062300/Glyma.11G137500/Glyma.14G198900/Glyma.02G231600	4
BP	GO:0006096	glycolytic process	6/483	90/16967	0.404945	Glyma.11G111400/Glyma.11G247600/Glyma.09G153900/Glyma.19G017200/Glyma.04G104500/Glyma.06G105600	6
BP	GO:0006757	ATP generation from ADP	6/483	90/16967	0.404945	Glyma.11G111400/Glyma.11G247600/Glyma.09G153900/Glyma.19G017200/Glyma.04G104500/Glyma.06G105600	6
BP	GO:0009135	purine nucleoside diphosphate metabolic process	6/483	90/16967	0.404945	Glyma.11G111400/Glyma.11G247600/Glyma.09G153900/Glyma.19G017200/Glyma.04G104500/Glyma.06G105600	6
BP	GO:0009179	purine ribonucleoside diphosphate metabolic process	6/483	90/16967	0.404945	Glyma.11G111400/Glyma.11G247600/Glyma.09G153900/Glyma.19G017200/Glyma.04G104500/Glyma.06G105600	6
BP	GO:0046031	ADP metabolic process	6/483	90/16967	0.404945	Glyma.11G111400/Glyma.11G247600/Glyma.09G153900/Glyma.19G017200/Glyma.04G104500/Glyma.06G105600	6
BP	GO:0046148	pigment biosynthetic process	7/483	114/16967	0.409993	Glyma.12G067000/Glyma.02G283400/Glyma.14G072700/Glyma.04G050400/Glyma.06G270400/Glyma.02G218300/Glyma.18G225000	7
BP	GO:0009314	response to radiation	11/483	217/16967	0.414718	Glyma.13G276700/Glyma.10G136300/Glyma.14G193200/Glyma.20G085900/Glyma.12G224600/Glyma.13G218200/Glyma.13G082300/Glyma.03G081700/Glyma.19G165300/Glyma.11G074900/Glyma.02G226300	11
BP	GO:0009226	nucleotide-sugar biosynthetic process	4/483	48/16967	0.414718	Glyma.17G027300/Glyma.10G018400/Glyma.19G211300/Glyma.05G022600	4
BP	GO:0010921	regulation of phosphatase activity	4/483	48/16967	0.414718	Glyma.07G243600/Glyma.15G145600/Glyma.09G040500/Glyma.07G243500	4
BP	GO:0007018	microtubule-based movement	7/483	116/16967	0.414718	Glyma.03G217000/Glyma.15G256400/Glyma.03G237800/Glyma.01G168200/Glyma.05G085400/Glyma.14G085200/Glyma.05G149700	7
BP	GO:0016128	phytosteroid metabolic process	3/483	29/16967	0.414718	Glyma.17G118100/Glyma.01G175500/Glyma.16G133800	3
BP	GO:0016131	brassinosteroid metabolic process	3/483	29/16967	0.414718	Glyma.17G118100/Glyma.01G175500/Glyma.16G133800	3
BP	GO:0006165	nucleoside diphosphate phosphorylation	6/483	93/16967	0.414718	Glyma.11G111400/Glyma.11G247600/Glyma.09G153900/Glyma.19G017200/Glyma.04G104500/Glyma.06G105600	6
BP	GO:0016125	sterol metabolic process	6/483	93/16967	0.414718	Glyma.16G109300/Glyma.13G253100/Glyma.17G069100/Glyma.01G175500/Glyma.16G133800/Glyma.15G061800	6
BP	GO:0006851	mitochondrial calcium ion transmembrane transport	2/483	13/16967	0.414718	Glyma.02G059200/Glyma.01G178500	2
BP	GO:0009773	photosynthetic electron transport in photosystem I	2/483	13/16967	0.414718	Glyma.10G136300/Glyma.20G085900	2
BP	GO:0019722	calcium-mediated signaling	2/483	13/16967	0.414718	Glyma.03G213000/Glyma.11G055200	2
BP	GO:0036444	calcium import into the mitochondrion	2/483	13/16967	0.414718	Glyma.02G059200/Glyma.01G178500	2
BP	GO:0060401	cytosolic calcium ion transport	2/483	13/16967	0.414718	Glyma.02G059200/Glyma.01G178500	2
BP	GO:0070509	calcium ion import	2/483	13/16967	0.414718	Glyma.02G059200/Glyma.01G178500	2
BP	GO:0009605	response to external stimulus	16/483	359/16967	0.41867	Glyma.19G015300/Glyma.05G099300/Glyma.18G191800/Glyma.03G051100/Glyma.09G040500/Glyma.06G055400/Glyma.09G150500/Glyma.13G068800/Glyma.06G035300/Glyma.05G196900/Glyma.07G141500/Glyma.18G152400/Glyma.18G294400/Glyma.13G285300/Glyma.03G247500/Glyma.02G042500	16
BP	GO:0046939	nucleotide phosphorylation	6/483	95/16967	0.428367	Glyma.11G111400/Glyma.11G247600/Glyma.09G153900/Glyma.19G017200/Glyma.04G104500/Glyma.06G105600	6
BP	GO:0051704	multi-organism process	8/483	145/16967	0.435729	Glyma.06G294500/Glyma.12G140200/Glyma.13G303800/Glyma.15G064900/Glyma.13G248900/Glyma.06G258200/Glyma.03G054900/Glyma.10G039500	8
BP	GO:0006631	fatty acid metabolic process	10/483	197/16967	0.435729	Glyma.02G203300/Glyma.08G204300/Glyma.18G099500/Glyma.03G264300/Glyma.07G034900/Glyma.19G263300/Glyma.20G210900/Glyma.09G138100/Glyma.03G237300/Glyma.15G026400	10
BP	GO:0010411	xyloglucan metabolic process	5/483	73/16967	0.440398	Glyma.11G253900/Glyma.02G068900/Glyma.01G196800/Glyma.09G062600/Glyma.20G141800	5
BP	GO:0009185	ribonucleoside diphosphate metabolic process	6/483	97/16967	0.446998	Glyma.11G111400/Glyma.11G247600/Glyma.09G153900/Glyma.19G017200/Glyma.04G104500/Glyma.06G105600	6
BP	GO:0051560	mitochondrial calcium ion homeostasis	2/483	14/16967	0.446998	Glyma.02G059200/Glyma.01G178500	2
BP	GO:0051017	actin filament bundle assembly	3/483	32/16967	0.463093	Glyma.05G218400/Glyma.17G092600/Glyma.14G005200	3
BP	GO:0061572	actin filament bundle organization	3/483	32/16967	0.463093	Glyma.05G218400/Glyma.17G092600/Glyma.14G005200	3
BP	GO:0072330	monocarboxylic acid biosynthetic process	10/483	202/16967	0.467053	Glyma.02G203300/Glyma.03G264300/Glyma.17G049900/Glyma.02G309300/Glyma.07G034900/Glyma.19G263300/Glyma.03G147700/Glyma.20G210900/Glyma.03G237300/Glyma.15G026400	10
BP	GO:0042440	pigment metabolic process	7/483	124/16967	0.467053	Glyma.12G067000/Glyma.02G283400/Glyma.14G072700/Glyma.04G050400/Glyma.06G270400/Glyma.02G218300/Glyma.18G225000	7
BP	GO:0006749	glutathione metabolic process	6/483	100/16967	0.467053	Glyma.07G139700/Glyma.20G101100/Glyma.11G198500/Glyma.05G161600/Glyma.02G024800/Glyma.05G161400	6
BP	GO:0006558	L-phenylalanine metabolic process	2/483	15/16967	0.467053	Glyma.02G309300/Glyma.12G181800	2
BP	GO:0009695	jasmonic acid biosynthetic process	2/483	15/16967	0.467053	Glyma.17G049900/Glyma.03G147700	2
BP	GO:0019932	second-messenger-mediated signaling	2/483	15/16967	0.467053	Glyma.03G213000/Glyma.11G055200	2
BP	GO:0120254	olefinic compound metabolic process	2/483	15/16967	0.467053	Glyma.16G109300/Glyma.02G309300	2
BP	GO:1902221	erythrose 4-phosphate/phosphoenolpyruvate family amino acid metabolic process	2/483	15/16967	0.467053	Glyma.02G309300/Glyma.12G181800	2
BP	GO:0009856	pollination	6/483	101/16967	0.47333	Glyma.12G140200/Glyma.13G303800/Glyma.15G064900/Glyma.13G248900/Glyma.06G258200/Glyma.03G054900	6
BP	GO:0044706	multi-multicellular organism process	6/483	101/16967	0.47333	Glyma.12G140200/Glyma.13G303800/Glyma.15G064900/Glyma.13G248900/Glyma.06G258200/Glyma.03G054900	6
BP	GO:1901605	alpha-amino acid metabolic process	13/483	288/16967	0.475155	Glyma.08G091500/Glyma.08G047800/Glyma.05G152100/Glyma.06G169700/Glyma.06G052100/Glyma.05G042400/Glyma.13G001200/Glyma.02G309300/Glyma.12G181800/Glyma.10G261400/Glyma.18G061100/Glyma.11G170300/Glyma.16G038300	13
BP	GO:0006835	dicarboxylic acid transport	3/483	34/16967	0.487882	Glyma.09G050200/Glyma.12G094400/Glyma.02G097700	3
BP	GO:0006575	cellular modified amino acid metabolic process	8/483	154/16967	0.497026	Glyma.07G139700/Glyma.05G152100/Glyma.20G101100/Glyma.11G198500/Glyma.05G161600/Glyma.02G024800/Glyma.05G161400/Glyma.16G034300	8
BP	GO:0009067	aspartate family amino acid biosynthetic process	4/483	56/16967	0.502579	Glyma.08G047800/Glyma.18G061100/Glyma.11G170300/Glyma.16G038300	4
BP	GO:0045934	negative regulation of nucleobase-containing compound metabolic process	7/483	129/16967	0.504331	Glyma.06G204100/Glyma.04G214600/Glyma.15G014500/Glyma.01G060300/Glyma.03G084300/Glyma.02G118500/Glyma.06G151500	7
BP	GO:0046351	disaccharide biosynthetic process	3/483	35/16967	0.507561	Glyma.09G231400/Glyma.04G180900/Glyma.14G171700	3
BP	GO:0016052	carbohydrate catabolic process	15/483	351/16967	0.507665	Glyma.04G111300/Glyma.11G111400/Glyma.19G038400/Glyma.11G247600/Glyma.15G110500/Glyma.01G151800/Glyma.11G244900/Glyma.18G175300/Glyma.09G153900/Glyma.19G017200/Glyma.09G168300/Glyma.15G184400/Glyma.04G104500/Glyma.06G105600/Glyma.02G042500	15
BP	GO:0071555	cell wall organization	15/483	351/16967	0.507665	Glyma.11G253900/Glyma.13G336600/Glyma.08G309900/Glyma.07G229000/Glyma.18G260900/Glyma.04G021600/Glyma.02G068900/Glyma.01G196800/Glyma.02G248500/Glyma.09G062600/Glyma.15G184400/Glyma.20G141800/Glyma.07G132600/Glyma.11G139100/Glyma.16G107300	15
BP	GO:0006694	steroid biosynthetic process	5/483	81/16967	0.524642	Glyma.13G253100/Glyma.17G069100/Glyma.01G175500/Glyma.16G133800/Glyma.15G061800	5
BP	GO:0035304	regulation of protein dephosphorylation	4/483	58/16967	0.52965	Glyma.07G243600/Glyma.15G145600/Glyma.09G040500/Glyma.07G243500	4
BP	GO:0046655	folic acid metabolic process	2/483	17/16967	0.52965	Glyma.05G152100/Glyma.16G034300	2
BP	GO:0008652	cellular amino acid biosynthetic process	11/483	241/16967	0.534215	Glyma.08G047800/Glyma.05G152100/Glyma.06G169700/Glyma.04G049200/Glyma.13G001200/Glyma.12G181800/Glyma.02G208400/Glyma.10G261400/Glyma.18G061100/Glyma.11G170300/Glyma.16G038300	11
BP	GO:1901607	alpha-amino acid biosynthetic process	9/483	187/16967	0.534215	Glyma.08G047800/Glyma.05G152100/Glyma.06G169700/Glyma.13G001200/Glyma.12G181800/Glyma.10G261400/Glyma.18G061100/Glyma.11G170300/Glyma.16G038300	9
BP	GO:0009627	systemic acquired resistance	3/483	37/16967	0.534215	Glyma.18G191800/Glyma.07G141500/Glyma.18G152400	3
BP	GO:0030004	cellular monovalent inorganic cation homeostasis	3/483	37/16967	0.534215	Glyma.14G134100/Glyma.03G262600/Glyma.17G061800	3
BP	GO:0030641	regulation of cellular pH	3/483	37/16967	0.534215	Glyma.14G134100/Glyma.03G262600/Glyma.17G061800	3
BP	GO:0051453	regulation of intracellular pH	3/483	37/16967	0.534215	Glyma.14G134100/Glyma.03G262600/Glyma.17G061800	3
BP	GO:0031047	gene silencing by RNA	5/483	83/16967	0.534215	Glyma.09G025400/Glyma.03G262100/Glyma.19G261200/Glyma.17G104100/Glyma.06G213300	5
BP	GO:0016054	organic acid catabolic process	8/483	161/16967	0.541125	Glyma.08G091500/Glyma.05G152100/Glyma.19G038400/Glyma.06G052100/Glyma.02G309300/Glyma.13G218200/Glyma.06G120300/Glyma.19G009000	8
BP	GO:0000160	phosphorelay signal transduction system	6/483	109/16967	0.546141	Glyma.04G137600/Glyma.06G142300/Glyma.03G261300/Glyma.11G041300/Glyma.11G155100/Glyma.05G070200	6
BP	GO:0071669	plant-type cell wall organization or biogenesis	9/483	191/16967	0.573012	Glyma.13G336600/Glyma.07G229000/Glyma.18G260900/Glyma.04G021600/Glyma.02G248500/Glyma.11G251000/Glyma.07G132600/Glyma.11G139100/Glyma.18G272200	9
BP	GO:0006811	ion transport	16/483	395/16967	0.573314	Glyma.14G134100/Glyma.07G184800/Glyma.02G059200/Glyma.01G178500/Glyma.18G141900/Glyma.09G010700/Glyma.09G050200/Glyma.12G094400/Glyma.06G055400/Glyma.19G221000/Glyma.03G262600/Glyma.02G097700/Glyma.19G164300/Glyma.17G061800/Glyma.11G232600/Glyma.16G015600	16
BP	GO:0006026	aminoglycan catabolic process	2/483	19/16967	0.573314	Glyma.17G217000/Glyma.02G042500	2
BP	GO:0006030	chitin metabolic process	2/483	19/16967	0.573314	Glyma.17G217000/Glyma.02G042500	2
BP	GO:0006032	chitin catabolic process	2/483	19/16967	0.573314	Glyma.17G217000/Glyma.02G042500	2
BP	GO:0019359	nicotinamide nucleotide biosynthetic process	2/483	19/16967	0.573314	Glyma.17G150300/Glyma.05G042400	2
BP	GO:0046348	amino sugar catabolic process	2/483	19/16967	0.573314	Glyma.17G217000/Glyma.02G042500	2
BP	GO:1901072	glucosamine-containing compound catabolic process	2/483	19/16967	0.573314	Glyma.17G217000/Glyma.02G042500	2
BP	GO:0007186	G protein-coupled receptor signaling pathway	3/483	40/16967	0.585317	Glyma.15G262600/Glyma.17G226700/Glyma.14G098000	3
BP	GO:0051648	vesicle localization	3/483	40/16967	0.585317	Glyma.08G161500/Glyma.10G286300/Glyma.15G266300	3
BP	GO:0051650	establishment of vesicle localization	3/483	40/16967	0.585317	Glyma.08G161500/Glyma.10G286300/Glyma.15G266300	3
BP	GO:0009132	nucleoside diphosphate metabolic process	6/483	114/16967	0.594479	Glyma.11G111400/Glyma.11G247600/Glyma.09G153900/Glyma.19G017200/Glyma.04G104500/Glyma.06G105600	6
BP	GO:0030574	collagen catabolic process	2/483	20/16967	0.603511	Glyma.02G215700/Glyma.02G028200	2
BP	GO:0016458	gene silencing	5/483	89/16967	0.603511	Glyma.09G025400/Glyma.03G262100/Glyma.19G261200/Glyma.17G104100/Glyma.06G213300	5
BP	GO:0006885	regulation of pH	4/483	65/16967	0.617252	Glyma.14G134100/Glyma.03G171500/Glyma.03G262600/Glyma.17G061800	4
BP	GO:0035303	regulation of dephosphorylation	4/483	65/16967	0.617252	Glyma.07G243600/Glyma.15G145600/Glyma.09G040500/Glyma.07G243500	4
BP	GO:0019363	pyridine nucleotide biosynthetic process	2/483	21/16967	0.638654	Glyma.17G150300/Glyma.05G042400	2
BP	GO:0032963	collagen metabolic process	2/483	21/16967	0.638654	Glyma.02G215700/Glyma.02G028200	2
BP	GO:0006520	cellular amino acid metabolic process	18/483	467/16967	0.640097	Glyma.08G091500/Glyma.08G047800/Glyma.05G152100/Glyma.06G169700/Glyma.06G052100/Glyma.04G049200/Glyma.07G059000/Glyma.05G042400/Glyma.13G001200/Glyma.02G309300/Glyma.12G181800/Glyma.02G208400/Glyma.10G261400/Glyma.18G061100/Glyma.15G128000/Glyma.11G170300/Glyma.16G038300/Glyma.06G120300	18
BP	GO:0009639	response to red or far red light	4/483	67/16967	0.650149	Glyma.13G276700/Glyma.12G224600/Glyma.03G081700/Glyma.11G074900	4
BP	GO:0055067	monovalent inorganic cation homeostasis	4/483	67/16967	0.650149	Glyma.14G134100/Glyma.03G171500/Glyma.03G262600/Glyma.17G061800	4
BP	GO:0006633	fatty acid biosynthetic process	7/483	147/16967	0.658704	Glyma.02G203300/Glyma.03G264300/Glyma.07G034900/Glyma.19G263300/Glyma.20G210900/Glyma.03G237300/Glyma.15G026400	7
BP	GO:0006108	malate metabolic process	2/483	22/16967	0.658704	Glyma.09G262900/Glyma.15G019300	2
BP	GO:0009411	response to UV	2/483	22/16967	0.658704	Glyma.14G193200/Glyma.02G226300	2
BP	GO:0045005	DNA-dependent DNA replication maintenance of fidelity	2/483	22/16967	0.658704	Glyma.06G155300/Glyma.10G227900	2
BP	GO:0050832	defense response to fungus	3/483	44/16967	0.658704	Glyma.09G040500/Glyma.03G247500/Glyma.02G042500	3
BP	GO:0005996	monosaccharide metabolic process	10/483	233/16967	0.658704	Glyma.02G046800/Glyma.11G247600/Glyma.02G123200/Glyma.19G124600/Glyma.17G027300/Glyma.10G018400/Glyma.19G211300/Glyma.19G017200/Glyma.16G019900/Glyma.20G094500	10
BP	GO:0046395	carboxylic acid catabolic process	7/483	148/16967	0.658704	Glyma.08G091500/Glyma.05G152100/Glyma.19G038400/Glyma.06G052100/Glyma.02G309300/Glyma.06G120300/Glyma.19G009000	7
BP	GO:0009620	response to fungus	3/483	45/16967	0.680288	Glyma.09G040500/Glyma.03G247500/Glyma.02G042500	3
BP	GO:0016126	sterol biosynthetic process	3/483	45/16967	0.680288	Glyma.13G253100/Glyma.17G069100/Glyma.15G061800	3
BP	GO:0009071	serine family amino acid catabolic process	2/483	23/16967	0.685214	Glyma.05G152100/Glyma.06G052100	2
BP	GO:0046496	nicotinamide nucleotide metabolic process	2/483	23/16967	0.685214	Glyma.17G150300/Glyma.05G042400	2
BP	GO:0046856	phosphatidylinositol dephosphorylation	3/483	46/16967	0.697886	Glyma.20G170500/Glyma.07G107000/Glyma.08G241500	3
BP	GO:0055088	lipid homeostasis	3/483	46/16967	0.697886	Glyma.17G118100/Glyma.01G175500/Glyma.16G133800	3
BP	GO:0006820	anion transport	7/483	152/16967	0.699389	Glyma.18G141900/Glyma.09G010700/Glyma.09G050200/Glyma.12G094400/Glyma.06G055400/Glyma.02G097700/Glyma.19G164300	7
BP	GO:0098662	inorganic cation transmembrane transport	7/483	153/16967	0.699389	Glyma.14G134100/Glyma.02G059200/Glyma.01G178500/Glyma.19G221000/Glyma.03G262600/Glyma.17G061800/Glyma.16G015600	7
BP	GO:0015977	carbon fixation	2/483	24/16967	0.699389	Glyma.18G070500/Glyma.08G335500	2
BP	GO:1901617	organic hydroxy compound biosynthetic process	8/483	182/16967	0.699389	Glyma.12G067000/Glyma.13G253100/Glyma.17G069100/Glyma.01G175500/Glyma.14G072200/Glyma.16G133800/Glyma.15G061800/Glyma.08G277000	8
BP	GO:0009738	abscisic acid-activated signaling pathway	4/483	72/16967	0.699389	Glyma.07G243600/Glyma.15G145600/Glyma.09G040500/Glyma.07G243500	4
BP	GO:0071215	cellular response to abscisic acid stimulus	4/483	72/16967	0.699389	Glyma.07G243600/Glyma.15G145600/Glyma.09G040500/Glyma.07G243500	4
BP	GO:0097306	cellular response to alcohol	4/483	72/16967	0.699389	Glyma.07G243600/Glyma.15G145600/Glyma.09G040500/Glyma.07G243500	4
BP	GO:1902600	proton transmembrane transport	4/483	72/16967	0.699389	Glyma.14G134100/Glyma.03G262600/Glyma.17G061800/Glyma.16G015600	4
BP	GO:0016042	lipid catabolic process	7/483	155/16967	0.713845	Glyma.17G244200/Glyma.14G081500/Glyma.04G020400/Glyma.14G081200/Glyma.02G267100/Glyma.13G218200/Glyma.14G081300	7
BP	GO:1901606	alpha-amino acid catabolic process	4/483	73/16967	0.713845	Glyma.08G091500/Glyma.05G152100/Glyma.06G052100/Glyma.02G309300	4
BP	GO:0071554	cell wall organization or biogenesis	18/483	486/16967	0.713845	Glyma.11G253900/Glyma.13G336600/Glyma.08G309900/Glyma.07G229000/Glyma.18G260900/Glyma.04G021600/Glyma.02G068900/Glyma.01G196800/Glyma.02G248500/Glyma.11G251000/Glyma.09G062600/Glyma.15G184400/Glyma.20G141800/Glyma.07G132600/Glyma.11G139100/Glyma.18G272200/Glyma.16G107300/Glyma.02G042500	18
BP	GO:0015849	organic acid transport	8/483	184/16967	0.713845	Glyma.18G277600/Glyma.09G050200/Glyma.12G094400/Glyma.06G156600/Glyma.06G156200/Glyma.18G029000/Glyma.10G109500/Glyma.02G097700	8
BP	GO:0009312	oligosaccharide biosynthetic process	3/483	48/16967	0.713845	Glyma.09G231400/Glyma.04G180900/Glyma.14G171700	3
BP	GO:0019362	pyridine nucleotide metabolic process	2/483	25/16967	0.720666	Glyma.17G150300/Glyma.05G042400	2
BP	GO:0009063	cellular amino acid catabolic process	5/483	101/16967	0.720748	Glyma.08G091500/Glyma.05G152100/Glyma.06G052100/Glyma.02G309300/Glyma.06G120300	5
BP	GO:0046839	phospholipid dephosphorylation	3/483	49/16967	0.720748	Glyma.20G170500/Glyma.07G107000/Glyma.08G241500	3
BP	GO:0009617	response to bacterium	4/483	75/16967	0.720748	Glyma.03G051100/Glyma.09G150500/Glyma.18G294400/Glyma.03G247500	4
BP	GO:0042742	defense response to bacterium	4/483	75/16967	0.720748	Glyma.03G051100/Glyma.09G150500/Glyma.18G294400/Glyma.03G247500	4
BP	GO:0140352	export from cell	6/483	130/16967	0.720748	Glyma.14G134100/Glyma.10G082500/Glyma.18G277600/Glyma.03G262600/Glyma.17G061800/Glyma.09G198200	6
BP	GO:0000413	protein peptidyl-prolyl isomerization	2/483	26/16967	0.720748	Glyma.05G149900/Glyma.03G086200	2
BP	GO:0006544	glycine metabolic process	2/483	26/16967	0.720748	Glyma.05G152100/Glyma.06G052100	2
BP	GO:0016129	phytosteroid biosynthetic process	2/483	26/16967	0.720748	Glyma.01G175500/Glyma.16G133800	2
BP	GO:0016132	brassinosteroid biosynthetic process	2/483	26/16967	0.720748	Glyma.01G175500/Glyma.16G133800	2
BP	GO:0120178	steroid hormone biosynthetic process	2/483	26/16967	0.720748	Glyma.01G175500/Glyma.16G133800	2
BP	GO:1901071	glucosamine-containing compound metabolic process	2/483	26/16967	0.720748	Glyma.17G217000/Glyma.02G042500	2
BP	GO:0010558	negative regulation of macromolecule biosynthetic process	8/483	188/16967	0.720748	Glyma.06G204100/Glyma.04G214600/Glyma.15G014500/Glyma.01G060300/Glyma.10G227900/Glyma.03G084300/Glyma.02G118500/Glyma.06G151500	8
BP	GO:2000113	negative regulation of cellular macromolecule biosynthetic process	8/483	188/16967	0.720748	Glyma.06G204100/Glyma.04G214600/Glyma.15G014500/Glyma.01G060300/Glyma.10G227900/Glyma.03G084300/Glyma.02G118500/Glyma.06G151500	8
BP	GO:0010410	hemicellulose metabolic process	6/483	131/16967	0.721051	Glyma.11G253900/Glyma.02G068900/Glyma.01G196800/Glyma.11G251000/Glyma.09G062600/Glyma.20G141800	6
BP	GO:0030003	cellular cation homeostasis	6/483	131/16967	0.721051	Glyma.14G134100/Glyma.02G059200/Glyma.01G178500/Glyma.03G262600/Glyma.17G061800/Glyma.11G232600	6
BP	GO:0010605	negative regulation of macromolecule metabolic process	14/483	371/16967	0.721051	Glyma.09G025400/Glyma.06G204100/Glyma.04G214600/Glyma.15G014500/Glyma.03G262100/Glyma.19G261200/Glyma.01G060300/Glyma.17G104100/Glyma.19G005800/Glyma.06G213300/Glyma.10G227900/Glyma.03G084300/Glyma.02G118500/Glyma.06G151500	14
BP	GO:0098655	cation transmembrane transport	7/483	161/16967	0.721051	Glyma.14G134100/Glyma.02G059200/Glyma.01G178500/Glyma.19G221000/Glyma.03G262600/Glyma.17G061800/Glyma.16G015600	7
BP	GO:0009069	serine family amino acid metabolic process	4/483	77/16967	0.721051	Glyma.05G152100/Glyma.06G052100/Glyma.13G001200/Glyma.10G261400	4
BP	GO:0006813	potassium ion transport	3/483	51/16967	0.721051	Glyma.07G184800/Glyma.19G221000/Glyma.16G015600	3
BP	GO:0048580	regulation of post-embryonic development	3/483	51/16967	0.721051	Glyma.08G345100/Glyma.03G081700/Glyma.08G255200	3
BP	GO:2000026	regulation of multicellular organismal development	3/483	51/16967	0.721051	Glyma.08G345100/Glyma.03G081700/Glyma.08G255200	3
BP	GO:0009086	methionine biosynthetic process	2/483	27/16967	0.721051	Glyma.08G047800/Glyma.16G038300	2
BP	GO:0015743	malate transport	2/483	27/16967	0.721051	Glyma.12G094400/Glyma.02G097700	2
BP	GO:0032436	positive regulation of proteasomal ubiquitin-dependent protein catabolic process	2/483	27/16967	0.721051	Glyma.03G134700/Glyma.08G228100	2
BP	GO:0045332	phospholipid translocation	2/483	27/16967	0.721051	Glyma.04G129200/Glyma.04G144900	2
BP	GO:0007015	actin filament organization	6/483	133/16967	0.721051	Glyma.08G161500/Glyma.05G218400/Glyma.17G092600/Glyma.10G286300/Glyma.14G005200/Glyma.15G266300	6
BP	GO:0006873	cellular ion homeostasis	6/483	135/16967	0.74448	Glyma.14G134100/Glyma.02G059200/Glyma.01G178500/Glyma.03G262600/Glyma.17G061800/Glyma.11G232600	6
BP	GO:0044036	cell wall macromolecule metabolic process	7/483	164/16967	0.74448	Glyma.11G253900/Glyma.02G068900/Glyma.01G196800/Glyma.11G251000/Glyma.09G062600/Glyma.20G141800/Glyma.02G042500	7
BP	GO:0006555	methionine metabolic process	2/483	28/16967	0.74448	Glyma.08G047800/Glyma.16G038300	2
BP	GO:0015740	C4-dicarboxylate transport	2/483	28/16967	0.74448	Glyma.12G094400/Glyma.02G097700	2
BP	GO:2000060	positive regulation of ubiquitin-dependent protein catabolic process	2/483	28/16967	0.74448	Glyma.03G134700/Glyma.08G228100	2
BP	GO:0000097	sulfur amino acid biosynthetic process	3/483	53/16967	0.749515	Glyma.08G047800/Glyma.13G001200/Glyma.16G038300	3
BP	GO:0030036	actin cytoskeleton organization	6/483	136/16967	0.749515	Glyma.08G161500/Glyma.05G218400/Glyma.17G092600/Glyma.10G286300/Glyma.14G005200/Glyma.15G266300	6
BP	GO:0009767	photosynthetic electron transport chain	2/483	29/16967	0.763982	Glyma.10G136300/Glyma.20G085900	2
BP	GO:0034204	lipid translocation	2/483	29/16967	0.763982	Glyma.04G129200/Glyma.04G144900	2
BP	GO:0072525	pyridine-containing compound biosynthetic process	2/483	29/16967	0.763982	Glyma.17G150300/Glyma.05G042400	2
BP	GO:0031327	negative regulation of cellular biosynthetic process	8/483	197/16967	0.763982	Glyma.06G204100/Glyma.04G214600/Glyma.15G014500/Glyma.01G060300/Glyma.10G227900/Glyma.03G084300/Glyma.02G118500/Glyma.06G151500	8
BP	GO:0006865	amino acid transport	6/483	138/16967	0.763982	Glyma.18G277600/Glyma.09G050200/Glyma.06G156600/Glyma.06G156200/Glyma.18G029000/Glyma.10G109500	6
BP	GO:0030029	actin filament-based process	6/483	138/16967	0.763982	Glyma.08G161500/Glyma.05G218400/Glyma.17G092600/Glyma.10G286300/Glyma.14G005200/Glyma.15G266300	6
BP	GO:0009892	negative regulation of metabolic process	14/483	384/16967	0.785754	Glyma.09G025400/Glyma.06G204100/Glyma.04G214600/Glyma.15G014500/Glyma.03G262100/Glyma.19G261200/Glyma.01G060300/Glyma.17G104100/Glyma.19G005800/Glyma.06G213300/Glyma.10G227900/Glyma.03G084300/Glyma.02G118500/Glyma.06G151500	14
BP	GO:0009694	jasmonic acid metabolic process	2/483	30/16967	0.785754	Glyma.17G049900/Glyma.03G147700	2
BP	GO:0015914	phospholipid transport	2/483	30/16967	0.785754	Glyma.04G129200/Glyma.04G144900	2
BP	GO:0032434	regulation of proteasomal ubiquitin-dependent protein catabolic process	2/483	30/16967	0.785754	Glyma.03G134700/Glyma.08G228100	2
BP	GO:0042445	hormone metabolic process	5/483	112/16967	0.798769	Glyma.17G118100/Glyma.06G053000/Glyma.01G175500/Glyma.16G133800/Glyma.18G277500	5
BP	GO:0009890	negative regulation of biosynthetic process	8/483	201/16967	0.798769	Glyma.06G204100/Glyma.04G214600/Glyma.15G014500/Glyma.01G060300/Glyma.10G227900/Glyma.03G084300/Glyma.02G118500/Glyma.06G151500	8
BP	GO:0098660	inorganic ion transmembrane transport	7/483	172/16967	0.798769	Glyma.14G134100/Glyma.02G059200/Glyma.01G178500/Glyma.19G221000/Glyma.03G262600/Glyma.17G061800/Glyma.16G015600	7
BP	GO:0010143	cutin biosynthetic process	2/483	31/16967	0.798769	Glyma.03G221100/Glyma.03G221400	2
BP	GO:0045087	innate immune response	2/483	31/16967	0.798769	Glyma.05G099300/Glyma.05G196900	2
BP	GO:0009070	serine family amino acid biosynthetic process	3/483	57/16967	0.798769	Glyma.05G152100/Glyma.13G001200/Glyma.10G261400	3
BP	GO:0042446	hormone biosynthetic process	4/483	85/16967	0.798769	Glyma.06G053000/Glyma.01G175500/Glyma.16G133800/Glyma.18G277500	4
BP	GO:0006783	heme biosynthetic process	2/483	32/16967	0.798769	Glyma.04G050400/Glyma.02G218300	2
BP	GO:0043650	dicarboxylic acid biosynthetic process	2/483	32/16967	0.798769	Glyma.02G208400/Glyma.16G034300	2
BP	GO:0070588	calcium ion transmembrane transport	2/483	32/16967	0.798769	Glyma.02G059200/Glyma.01G178500	2
BP	GO:0097035	regulation of membrane lipid distribution	2/483	32/16967	0.798769	Glyma.04G129200/Glyma.04G144900	2
BP	GO:1901800	positive regulation of proteasomal protein catabolic process	2/483	32/16967	0.798769	Glyma.03G134700/Glyma.08G228100	2
BP	GO:0055080	cation homeostasis	7/483	176/16967	0.798769	Glyma.14G134100/Glyma.03G171500/Glyma.02G059200/Glyma.01G178500/Glyma.03G262600/Glyma.17G061800/Glyma.11G232600	7
BP	GO:0072524	pyridine-containing compound metabolic process	2/483	33/16967	0.798769	Glyma.17G150300/Glyma.05G042400	2
BP	GO:1903052	positive regulation of proteolysis involved in cellular protein catabolic process	2/483	33/16967	0.798769	Glyma.03G134700/Glyma.08G228100	2
BP	GO:1903364	positive regulation of cellular protein catabolic process	2/483	33/16967	0.798769	Glyma.03G134700/Glyma.08G228100	2
BP	GO:2000058	regulation of ubiquitin-dependent protein catabolic process	2/483	33/16967	0.798769	Glyma.03G134700/Glyma.08G228100	2
BP	GO:0000096	sulfur amino acid metabolic process	3/483	60/16967	0.798769	Glyma.08G047800/Glyma.13G001200/Glyma.16G038300	3
BP	GO:0000972	transcription-dependent tethering of RNA polymerase II gene DNA at nuclear periphery	1/483	10/16967	0.798769	Glyma.15G051700	1
BP	GO:0006013	mannose metabolic process	1/483	10/16967	0.798769	Glyma.02G046800	1
BP	GO:0006564	L-serine biosynthetic process	1/483	10/16967	0.798769	Glyma.10G261400	1
BP	GO:0006565	L-serine catabolic process	1/483	10/16967	0.798769	Glyma.05G152100	1
BP	GO:0007076	mitotic chromosome condensation	1/483	10/16967	0.798769	Glyma.02G157700	1
BP	GO:0008156	negative regulation of DNA replication	1/483	10/16967	0.798769	Glyma.10G227900	1
BP	GO:0009095	aromatic amino acid family biosynthetic process, prephenate pathway	1/483	10/16967	0.798769	Glyma.12G181800	1
BP	GO:0015837	amine transport	1/483	10/16967	0.798769	Glyma.18G277600	1
BP	GO:0032890	regulation of organic acid transport	1/483	10/16967	0.798769	Glyma.18G277600	1
BP	GO:0032973	amino acid export across plasma membrane	1/483	10/16967	0.798769	Glyma.18G277600	1
BP	GO:0048582	positive regulation of post-embryonic development	1/483	10/16967	0.798769	Glyma.08G345100	1
BP	GO:0051094	positive regulation of developmental process	1/483	10/16967	0.798769	Glyma.08G345100	1
BP	GO:0051240	positive regulation of multicellular organismal process	1/483	10/16967	0.798769	Glyma.08G345100	1
BP	GO:0051952	regulation of amine transport	1/483	10/16967	0.798769	Glyma.18G277600	1
BP	GO:0051955	regulation of amino acid transport	1/483	10/16967	0.798769	Glyma.18G277600	1
BP	GO:0052863	1-deoxy-D-xylulose 5-phosphate metabolic process	1/483	10/16967	0.798769	Glyma.08G277000	1
BP	GO:0052865	1-deoxy-D-xylulose 5-phosphate biosynthetic process	1/483	10/16967	0.798769	Glyma.08G277000	1
BP	GO:0080143	regulation of amino acid export	1/483	10/16967	0.798769	Glyma.18G277600	1
BP	GO:1903789	regulation of amino acid transmembrane transport	1/483	10/16967	0.798769	Glyma.18G277600	1
BP	GO:1905784	regulation of anaphase-promoting complex-dependent catabolic process	1/483	10/16967	0.798769	Glyma.08G228100	1
BP	GO:1905786	positive regulation of anaphase-promoting complex-dependent catabolic process	1/483	10/16967	0.798769	Glyma.08G228100	1
BP	GO:2000104	negative regulation of DNA-dependent DNA replication	1/483	10/16967	0.798769	Glyma.10G227900	1
BP	GO:0046942	carboxylic acid transport	3/483	61/16967	0.798769	Glyma.09G050200/Glyma.12G094400/Glyma.02G097700	3
BP	GO:0010383	cell wall polysaccharide metabolic process	6/483	149/16967	0.798769	Glyma.11G253900/Glyma.02G068900/Glyma.01G196800/Glyma.11G251000/Glyma.09G062600/Glyma.20G141800	6
BP	GO:0055082	cellular chemical homeostasis	6/483	149/16967	0.798769	Glyma.14G134100/Glyma.02G059200/Glyma.01G178500/Glyma.03G262600/Glyma.17G061800/Glyma.11G232600	6
BP	GO:0006767	water-soluble vitamin metabolic process	4/483	90/16967	0.804932	Glyma.05G152100/Glyma.16G019900/Glyma.08G277000/Glyma.16G034300	4
BP	GO:0034220	ion transmembrane transport	8/483	212/16967	0.814526	Glyma.14G134100/Glyma.02G059200/Glyma.01G178500/Glyma.09G010700/Glyma.19G221000/Glyma.03G262600/Glyma.17G061800/Glyma.16G015600	8
BP	GO:0098771	inorganic ion homeostasis	7/483	182/16967	0.815521	Glyma.14G134100/Glyma.03G171500/Glyma.02G059200/Glyma.01G178500/Glyma.03G262600/Glyma.17G061800/Glyma.11G232600	7
BP	GO:0048878	chemical homeostasis	10/483	276/16967	0.815521	Glyma.14G134100/Glyma.03G171500/Glyma.17G118100/Glyma.02G059200/Glyma.01G178500/Glyma.01G175500/Glyma.16G133800/Glyma.03G262600/Glyma.17G061800/Glyma.11G232600	10
BP	GO:0006284	base-excision repair	2/483	35/16967	0.815521	Glyma.09G018700/Glyma.06G155300	2
BP	GO:0042168	heme metabolic process	2/483	35/16967	0.815521	Glyma.04G050400/Glyma.02G218300	2
BP	GO:0061136	regulation of proteasomal protein catabolic process	2/483	35/16967	0.815521	Glyma.03G134700/Glyma.08G228100	2
BP	GO:0006812	cation transport	9/483	245/16967	0.816702	Glyma.14G134100/Glyma.07G184800/Glyma.02G059200/Glyma.01G178500/Glyma.19G221000/Glyma.03G262600/Glyma.17G061800/Glyma.11G232600/Glyma.16G015600	9
BP	GO:0046034	ATP metabolic process	7/483	183/16967	0.816702	Glyma.11G111400/Glyma.11G247600/Glyma.09G153900/Glyma.19G017200/Glyma.01G230900/Glyma.04G104500/Glyma.06G105600	7
BP	GO:0007142	male meiosis II	1/483	11/16967	0.816702	Glyma.10G039500	1
BP	GO:0008535	respiratory chain complex IV assembly	1/483	11/16967	0.816702	Glyma.11G235000	1
BP	GO:0010017	red or far-red light signaling pathway	1/483	11/16967	0.816702	Glyma.03G081700	1
BP	GO:0019264	glycine biosynthetic process from serine	1/483	11/16967	0.816702	Glyma.05G152100	1
BP	GO:0033617	mitochondrial cytochrome c oxidase assembly	1/483	11/16967	0.816702	Glyma.11G235000	1
BP	GO:0046835	carbohydrate phosphorylation	1/483	11/16967	0.816702	Glyma.14G072200	1
BP	GO:0052746	inositol phosphorylation	1/483	11/16967	0.816702	Glyma.14G072200	1
BP	GO:0071489	cellular response to red or far red light	1/483	11/16967	0.816702	Glyma.03G081700	1
BP	GO:0007017	microtubule-based process	11/483	312/16967	0.816777	Glyma.12G223500/Glyma.06G270500/Glyma.03G217000/Glyma.15G256400/Glyma.03G237800/Glyma.01G168200/Glyma.08G008600/Glyma.05G085400/Glyma.13G277800/Glyma.14G085200/Glyma.05G149700	11
BP	GO:0044282	small molecule catabolic process	9/483	249/16967	0.816777	Glyma.08G091500/Glyma.05G152100/Glyma.14G156400/Glyma.19G038400/Glyma.06G052100/Glyma.02G309300/Glyma.13G218200/Glyma.06G120300/Glyma.19G009000	9
BP	GO:0009072	aromatic amino acid family metabolic process	3/483	65/16967	0.816777	Glyma.02G309300/Glyma.12G181800/Glyma.02G208400	3
BP	GO:0006816	calcium ion transport	2/483	37/16967	0.816777	Glyma.02G059200/Glyma.01G178500	2
BP	GO:0046653	tetrahydrofolate metabolic process	2/483	37/16967	0.816777	Glyma.05G152100/Glyma.16G034300	2
BP	GO:0097435	supramolecular fiber organization	7/483	188/16967	0.816777	Glyma.08G161500/Glyma.05G218400/Glyma.17G092600/Glyma.08G008600/Glyma.10G286300/Glyma.14G005200/Glyma.15G266300	7
BP	GO:0000963	mitochondrial RNA processing	1/483	12/16967	0.816777	Glyma.19G005800	1
BP	GO:0006123	mitochondrial electron transport, cytochrome c to oxygen	1/483	12/16967	0.816777	Glyma.01G230900	1
BP	GO:0006546	glycine catabolic process	1/483	12/16967	0.816777	Glyma.06G052100	1
BP	GO:0006598	polyamine catabolic process	1/483	12/16967	0.816777	Glyma.18G045100	1
BP	GO:0006714	sesquiterpenoid metabolic process	1/483	12/16967	0.816777	Glyma.16G109300	1
BP	GO:0009088	threonine biosynthetic process	1/483	12/16967	0.816777	Glyma.08G047800	1
BP	GO:0009423	chorismate biosynthetic process	1/483	12/16967	0.816777	Glyma.02G208400	1
BP	GO:0010167	response to nitrate	1/483	12/16967	0.816777	Glyma.18G141900	1
BP	GO:0017157	regulation of exocytosis	1/483	12/16967	0.816777	Glyma.09G198200	1
BP	GO:0019464	glycine decarboxylation via glycine cleavage system	1/483	12/16967	0.816777	Glyma.06G052100	1
BP	GO:0033169	histone H3-K9 demethylation	1/483	12/16967	0.816777	Glyma.17G010600	1
BP	GO:0051046	regulation of secretion	1/483	12/16967	0.816777	Glyma.09G198200	1
BP	GO:0120255	olefinic compound biosynthetic process	1/483	12/16967	0.816777	Glyma.02G309300	1
BP	GO:1903530	regulation of secretion by cell	1/483	12/16967	0.816777	Glyma.09G198200	1
BP	GO:0019953	sexual reproduction	2/483	38/16967	0.816777	Glyma.06G294500/Glyma.10G039500	2
BP	GO:0044703	multi-organism reproductive process	2/483	38/16967	0.816777	Glyma.06G294500/Glyma.10G039500	2
BP	GO:1903050	regulation of proteolysis involved in cellular protein catabolic process	2/483	38/16967	0.816777	Glyma.03G134700/Glyma.08G228100	2
BP	GO:1903362	regulation of cellular protein catabolic process	2/483	38/16967	0.816777	Glyma.03G134700/Glyma.08G228100	2
BP	GO:0000272	polysaccharide catabolic process	8/483	221/16967	0.816777	Glyma.04G111300/Glyma.15G110500/Glyma.01G151800/Glyma.11G244900/Glyma.18G175300/Glyma.09G168300/Glyma.15G184400/Glyma.02G042500	8
BP	GO:0030001	metal ion transport	6/483	159/16967	0.828536	Glyma.07G184800/Glyma.02G059200/Glyma.01G178500/Glyma.19G221000/Glyma.11G232600/Glyma.16G015600	6
BP	GO:0016311	dephosphorylation	8/483	223/16967	0.834786	Glyma.07G243600/Glyma.20G170500/Glyma.15G145600/Glyma.07G107000/Glyma.09G040500/Glyma.08G241500/Glyma.07G243500/Glyma.14G018100	8
BP	GO:0046364	monosaccharide biosynthetic process	2/483	39/16967	0.834847	Glyma.19G017200/Glyma.16G019900	2
BP	GO:0030154	cell differentiation	7/483	193/16967	0.834847	Glyma.13G032200/Glyma.17G192800/Glyma.18G295500/Glyma.13G307300/Glyma.17G159000/Glyma.07G054000/Glyma.17G133800	7
BP	GO:0006869	lipid transport	5/483	130/16967	0.834847	Glyma.09G160200/Glyma.04G129200/Glyma.08G041800/Glyma.04G144900/Glyma.18G210900	5
BP	GO:0000966	RNA 5'-end processing	1/483	13/16967	0.834847	Glyma.17G000100	1
BP	GO:0006305	DNA alkylation	1/483	13/16967	0.834847	Glyma.01G175300	1
BP	GO:0006306	DNA methylation	1/483	13/16967	0.834847	Glyma.01G175300	1
BP	GO:0016103	diterpenoid catabolic process	1/483	13/16967	0.834847	Glyma.13G218200	1
BP	GO:0016115	terpenoid catabolic process	1/483	13/16967	0.834847	Glyma.13G218200	1
BP	GO:0034471	ncRNA 5'-end processing	1/483	13/16967	0.834847	Glyma.17G000100	1
BP	GO:0045487	gibberellin catabolic process	1/483	13/16967	0.834847	Glyma.13G218200	1
BP	GO:0005984	disaccharide metabolic process	3/483	69/16967	0.834847	Glyma.09G231400/Glyma.04G180900/Glyma.14G171700	3
BP	GO:0006040	amino sugar metabolic process	2/483	40/16967	0.834847	Glyma.17G217000/Glyma.02G042500	2
BP	GO:0045862	positive regulation of proteolysis	2/483	40/16967	0.834847	Glyma.03G134700/Glyma.08G228100	2
BP	GO:0051656	establishment of organelle localization	4/483	100/16967	0.834847	Glyma.08G161500/Glyma.05G218400/Glyma.10G286300/Glyma.15G266300	4
BP	GO:0006721	terpenoid metabolic process	4/483	101/16967	0.834847	Glyma.16G109300/Glyma.02G283400/Glyma.13G218200/Glyma.08G277000	4
BP	GO:0050801	ion homeostasis	7/483	196/16967	0.834847	Glyma.14G134100/Glyma.03G171500/Glyma.02G059200/Glyma.01G178500/Glyma.03G262600/Glyma.17G061800/Glyma.11G232600	7
BP	GO:0006874	cellular calcium ion homeostasis	2/483	41/16967	0.834847	Glyma.02G059200/Glyma.01G178500	2
BP	GO:0012501	programmed cell death	2/483	41/16967	0.834847	Glyma.08G170400/Glyma.05G196900	2
BP	GO:0030198	extracellular matrix organization	2/483	41/16967	0.834847	Glyma.02G215700/Glyma.02G028200	2
BP	GO:0043062	extracellular structure organization	2/483	41/16967	0.834847	Glyma.02G215700/Glyma.02G028200	2
BP	GO:0055074	calcium ion homeostasis	2/483	41/16967	0.834847	Glyma.02G059200/Glyma.01G178500	2
BP	GO:0048869	cellular developmental process	7/483	197/16967	0.834847	Glyma.13G032200/Glyma.17G192800/Glyma.18G295500/Glyma.13G307300/Glyma.17G159000/Glyma.07G054000/Glyma.17G133800	7
BP	GO:0006538	glutamate catabolic process	1/483	14/16967	0.834847	Glyma.08G091500	1
BP	GO:0006545	glycine biosynthetic process	1/483	14/16967	0.834847	Glyma.05G152100	1
BP	GO:0009092	homoserine metabolic process	1/483	14/16967	0.834847	Glyma.13G001200	1
BP	GO:0009581	detection of external stimulus	1/483	14/16967	0.834847	Glyma.06G055400	1
BP	GO:0009582	detection of abiotic stimulus	1/483	14/16967	0.834847	Glyma.06G055400	1
BP	GO:0015807	L-amino acid transport	1/483	14/16967	0.834847	Glyma.09G050200	1
BP	GO:0018026	peptidyl-lysine monomethylation	1/483	14/16967	0.834847	Glyma.10G292500	1
BP	GO:0019853	L-ascorbic acid biosynthetic process	1/483	14/16967	0.834847	Glyma.16G019900	1
BP	GO:0051606	detection of stimulus	1/483	14/16967	0.834847	Glyma.06G055400	1
BP	GO:0007052	mitotic spindle organization	2/483	42/16967	0.834847	Glyma.05G085400/Glyma.14G085200	2
BP	GO:0009691	cytokinin biosynthetic process	2/483	42/16967	0.834847	Glyma.06G053000/Glyma.18G277500	2
BP	GO:0034599	cellular response to oxidative stress	2/483	42/16967	0.834847	Glyma.12G073100/Glyma.14G215400	2
BP	GO:0062197	cellular response to chemical stress	2/483	42/16967	0.834847	Glyma.12G073100/Glyma.14G215400	2
BP	GO:1902850	microtubule cytoskeleton organization involved in mitosis	2/483	42/16967	0.834847	Glyma.05G085400/Glyma.14G085200	2
BP	GO:0006766	vitamin metabolic process	4/483	103/16967	0.834847	Glyma.05G152100/Glyma.16G019900/Glyma.08G277000/Glyma.16G034300	4
BP	GO:0035556	intracellular signal transduction	15/483	464/16967	0.847417	Glyma.03G213000/Glyma.14G176700/Glyma.04G137600/Glyma.10G217000/Glyma.06G142300/Glyma.11G055200/Glyma.13G210300/Glyma.03G261300/Glyma.20G005300/Glyma.10G227900/Glyma.20G145800/Glyma.11G041300/Glyma.11G155100/Glyma.05G070200/Glyma.18G021600	15
BP	GO:0040008	regulation of growth	3/483	73/16967	0.847417	Glyma.08G272000/Glyma.01G044800/Glyma.17G258400	3
BP	GO:0045732	positive regulation of protein catabolic process	2/483	43/16967	0.847417	Glyma.03G134700/Glyma.08G228100	2
BP	GO:0072503	cellular divalent inorganic cation homeostasis	2/483	43/16967	0.847417	Glyma.02G059200/Glyma.01G178500	2
BP	GO:0072507	divalent inorganic cation homeostasis	2/483	43/16967	0.847417	Glyma.02G059200/Glyma.01G178500	2
BP	GO:1901615	organic hydroxy compound metabolic process	10/483	300/16967	0.847417	Glyma.16G109300/Glyma.17G118100/Glyma.12G067000/Glyma.13G253100/Glyma.17G069100/Glyma.01G175500/Glyma.14G072200/Glyma.16G133800/Glyma.15G061800/Glyma.08G277000	10
BP	GO:0016577	histone demethylation	1/483	15/16967	0.847417	Glyma.17G010600	1
BP	GO:0030388	fructose 1,6-bisphosphate metabolic process	1/483	15/16967	0.847417	Glyma.11G111400	1
BP	GO:0043649	dicarboxylic acid catabolic process	1/483	15/16967	0.847417	Glyma.08G091500	1
BP	GO:0070076	histone lysine demethylation	1/483	15/16967	0.847417	Glyma.17G010600	1
BP	GO:0006595	polyamine metabolic process	2/483	44/16967	0.858314	Glyma.18G045100/Glyma.05G036300	2
BP	GO:0042364	water-soluble vitamin biosynthetic process	3/483	75/16967	0.858314	Glyma.16G019900/Glyma.08G277000/Glyma.16G034300	3
BP	GO:0051239	regulation of multicellular organismal process	3/483	75/16967	0.858314	Glyma.08G345100/Glyma.03G081700/Glyma.08G255200	3
BP	GO:0006563	L-serine metabolic process	2/483	45/16967	0.858314	Glyma.05G152100/Glyma.10G261400	2
BP	GO:0006760	folic acid-containing compound metabolic process	2/483	45/16967	0.858314	Glyma.05G152100/Glyma.16G034300	2
BP	GO:0018208	peptidyl-proline modification	2/483	45/16967	0.858314	Glyma.05G149900/Glyma.03G086200	2
BP	GO:0006778	porphyrin-containing compound metabolic process	3/483	76/16967	0.858314	Glyma.04G050400/Glyma.03G213300/Glyma.02G218300	3
BP	GO:0006482	protein demethylation	1/483	16/16967	0.858314	Glyma.17G010600	1
BP	GO:0006566	threonine metabolic process	1/483	16/16967	0.858314	Glyma.08G047800	1
BP	GO:0008214	protein dealkylation	1/483	16/16967	0.858314	Glyma.17G010600	1
BP	GO:0034063	stress granule assembly	1/483	16/16967	0.858314	Glyma.01G153100	1
BP	GO:0043067	regulation of programmed cell death	1/483	16/16967	0.858314	Glyma.08G170400	1
BP	GO:0046654	tetrahydrofolate biosynthetic process	1/483	16/16967	0.858314	Glyma.16G034300	1
BP	GO:1901570	fatty acid derivative biosynthetic process	1/483	16/16967	0.858314	Glyma.03G221400	1
BP	GO:0031324	negative regulation of cellular metabolic process	8/483	240/16967	0.858314	Glyma.06G204100/Glyma.04G214600/Glyma.15G014500/Glyma.01G060300/Glyma.10G227900/Glyma.03G084300/Glyma.02G118500/Glyma.06G151500	8
BP	GO:0033013	tetrapyrrole metabolic process	3/483	77/16967	0.858314	Glyma.04G050400/Glyma.03G213300/Glyma.02G218300	3
BP	GO:0042592	homeostatic process	10/483	307/16967	0.858314	Glyma.14G134100/Glyma.03G171500/Glyma.17G118100/Glyma.02G059200/Glyma.01G178500/Glyma.01G175500/Glyma.16G133800/Glyma.03G262600/Glyma.17G061800/Glyma.11G232600	10
BP	GO:0008219	cell death	2/483	46/16967	0.858314	Glyma.08G170400/Glyma.05G196900	2
BP	GO:0009073	aromatic amino acid family biosynthetic process	2/483	46/16967	0.858314	Glyma.12G181800/Glyma.02G208400	2
BP	GO:0010876	lipid localization	5/483	142/16967	0.858314	Glyma.09G160200/Glyma.04G129200/Glyma.08G041800/Glyma.04G144900/Glyma.18G210900	5
BP	GO:0005978	glycogen biosynthetic process	1/483	17/16967	0.858314	Glyma.06G030400	1
BP	GO:0006826	iron ion transport	1/483	17/16967	0.858314	Glyma.11G232600	1
BP	GO:0009074	aromatic amino acid family catabolic process	1/483	17/16967	0.858314	Glyma.02G309300	1
BP	GO:0010026	trichome differentiation	1/483	17/16967	0.858314	Glyma.18G295500	1
BP	GO:0010090	trichome morphogenesis	1/483	17/16967	0.858314	Glyma.18G295500	1
BP	GO:0046292	formaldehyde metabolic process	1/483	17/16967	0.858314	Glyma.14G156400	1
BP	GO:0046294	formaldehyde catabolic process	1/483	17/16967	0.858314	Glyma.14G156400	1
BP	GO:0072318	clathrin coat disassembly	1/483	17/16967	0.858314	Glyma.04G033500	1
BP	GO:0072319	vesicle uncoating	1/483	17/16967	0.858314	Glyma.04G033500	1
BP	GO:0110095	cellular detoxification of aldehyde	1/483	17/16967	0.858314	Glyma.14G156400	1
BP	GO:0110096	cellular response to aldehyde	1/483	17/16967	0.858314	Glyma.14G156400	1
BP	GO:1901336	lactone biosynthetic process	1/483	17/16967	0.858314	Glyma.16G019900	1
BP	GO:0009636	response to toxic substance	2/483	47/16967	0.858314	Glyma.06G169700/Glyma.14G156400	2
BP	GO:0072329	monocarboxylic acid catabolic process	2/483	47/16967	0.858314	Glyma.19G038400/Glyma.19G009000	2
BP	GO:0050793	regulation of developmental process	5/483	144/16967	0.861632	Glyma.08G272000/Glyma.05G099300/Glyma.08G345100/Glyma.03G081700/Glyma.08G255200	5
BP	GO:0006720	isoprenoid metabolic process	5/483	146/16967	0.867723	Glyma.16G109300/Glyma.02G283400/Glyma.13G218200/Glyma.08G277000/Glyma.13G262200	5
BP	GO:0006122	mitochondrial electron transport, ubiquinol to cytochrome c	1/483	18/16967	0.867723	Glyma.01G230900	1
BP	GO:0006573	valine metabolic process	1/483	18/16967	0.867723	Glyma.06G169700	1
BP	GO:0008300	isoprenoid catabolic process	1/483	18/16967	0.867723	Glyma.13G218200	1
BP	GO:0009555	pollen development	1/483	18/16967	0.867723	Glyma.08G241500	1
BP	GO:0019852	L-ascorbic acid metabolic process	1/483	18/16967	0.867723	Glyma.16G019900	1
BP	GO:0071805	potassium ion transmembrane transport	1/483	18/16967	0.867723	Glyma.19G221000	1
BP	GO:0010817	regulation of hormone levels	5/483	147/16967	0.867723	Glyma.17G118100/Glyma.06G053000/Glyma.01G175500/Glyma.16G133800/Glyma.18G277500	5
BP	GO:0030162	regulation of proteolysis	2/483	49/16967	0.867723	Glyma.03G134700/Glyma.08G228100	2
BP	GO:0042558	pteridine-containing compound metabolic process	2/483	49/16967	0.867723	Glyma.05G152100/Glyma.16G034300	2
BP	GO:0015711	organic anion transport	3/483	82/16967	0.867723	Glyma.09G050200/Glyma.12G094400/Glyma.02G097700	3
BP	GO:0019725	cellular homeostasis	6/483	182/16967	0.867723	Glyma.14G134100/Glyma.02G059200/Glyma.01G178500/Glyma.03G262600/Glyma.17G061800/Glyma.11G232600	6
BP	GO:1901701	cellular response to oxygen-containing compound	7/483	216/16967	0.867723	Glyma.07G243600/Glyma.14G156400/Glyma.15G145600/Glyma.18G141900/Glyma.09G040500/Glyma.07G243500/Glyma.05G196900	7
BP	GO:0006268	DNA unwinding involved in DNA replication	1/483	19/16967	0.867723	Glyma.10G148300	1
BP	GO:0006782	protoporphyrinogen IX biosynthetic process	1/483	19/16967	0.867723	Glyma.02G218300	1
BP	GO:0009089	lysine biosynthetic process via diaminopimelate	1/483	19/16967	0.867723	Glyma.08G047800	1
BP	GO:0010088	phloem development	1/483	19/16967	0.867723	Glyma.20G204500	1
BP	GO:0034762	regulation of transmembrane transport	1/483	19/16967	0.867723	Glyma.18G277600	1
BP	GO:0046451	diaminopimelate metabolic process	1/483	19/16967	0.867723	Glyma.08G047800	1
BP	GO:0046501	protoporphyrinogen IX metabolic process	1/483	19/16967	0.867723	Glyma.02G218300	1
BP	GO:0071241	cellular response to inorganic substance	1/483	19/16967	0.867723	Glyma.18G141900	1
BP	GO:0006541	glutamine metabolic process	2/483	51/16967	0.867723	Glyma.18G061100/Glyma.11G170300	2
BP	GO:0051156	glucose 6-phosphate metabolic process	2/483	51/16967	0.867723	Glyma.19G038400/Glyma.19G017200	2
BP	GO:0009311	oligosaccharide metabolic process	3/483	84/16967	0.867723	Glyma.09G231400/Glyma.04G180900/Glyma.14G171700	3
BP	GO:0042546	cell wall biogenesis	7/483	220/16967	0.867723	Glyma.11G253900/Glyma.02G068900/Glyma.01G196800/Glyma.11G251000/Glyma.09G062600/Glyma.20G141800/Glyma.18G272200	7
BP	GO:0051172	negative regulation of nitrogen compound metabolic process	7/483	220/16967	0.867723	Glyma.06G204100/Glyma.04G214600/Glyma.15G014500/Glyma.01G060300/Glyma.03G084300/Glyma.02G118500/Glyma.06G151500	7
BP	GO:0009228	thiamine biosynthetic process	1/483	20/16967	0.867723	Glyma.08G277000	1
BP	GO:0009310	amine catabolic process	1/483	20/16967	0.867723	Glyma.18G045100	1
BP	GO:0009626	plant-type hypersensitive response	1/483	20/16967	0.867723	Glyma.05G196900	1
BP	GO:0019432	triglyceride biosynthetic process	1/483	20/16967	0.867723	Glyma.09G239600	1
BP	GO:0034050	programmed cell death induced by symbiont	1/483	20/16967	0.867723	Glyma.05G196900	1
BP	GO:0042402	cellular biogenic amine catabolic process	1/483	20/16967	0.867723	Glyma.18G045100	1
BP	GO:0046417	chorismate metabolic process	1/483	20/16967	0.867723	Glyma.02G208400	1
BP	GO:0046460	neutral lipid biosynthetic process	1/483	20/16967	0.867723	Glyma.09G239600	1
BP	GO:0046463	acylglycerol biosynthetic process	1/483	20/16967	0.867723	Glyma.09G239600	1
BP	GO:0051702	biological process involved in interaction with symbiont	1/483	20/16967	0.867723	Glyma.05G196900	1
BP	GO:0061077	chaperone-mediated protein folding	3/483	86/16967	0.867723	Glyma.05G149900/Glyma.03G086200/Glyma.18G127500	3
BP	GO:0006790	sulfur compound metabolic process	11/483	359/16967	0.867723	Glyma.07G139700/Glyma.08G047800/Glyma.13G001200/Glyma.20G101100/Glyma.11G198500/Glyma.05G161600/Glyma.08G277000/Glyma.02G024800/Glyma.08G345600/Glyma.16G038300/Glyma.05G161400	11
BP	GO:0009888	tissue development	4/483	120/16967	0.867723	Glyma.08G272000/Glyma.18G295500/Glyma.08G345100/Glyma.20G204500	4
BP	GO:0016579	protein deubiquitination	4/483	120/16967	0.867723	Glyma.09G204600/Glyma.17G201000/Glyma.15G248200/Glyma.14G132500	4
BP	GO:0015979	photosynthesis	7/483	223/16967	0.867723	Glyma.06G150300/Glyma.10G136300/Glyma.20G085900/Glyma.18G070500/Glyma.13G127200/Glyma.08G335500/Glyma.04G215800	7
BP	GO:0009150	purine ribonucleotide metabolic process	8/483	258/16967	0.867723	Glyma.11G111400/Glyma.11G247600/Glyma.09G153900/Glyma.19G017200/Glyma.08G345600/Glyma.04G104500/Glyma.06G105600/Glyma.05G045200	8
BP	GO:0006091	generation of precursor metabolites and energy	12/483	396/16967	0.867723	Glyma.11G111400/Glyma.19G038400/Glyma.11G247600/Glyma.04G123800/Glyma.10G136300/Glyma.09G153900/Glyma.20G085900/Glyma.19G017200/Glyma.01G230900/Glyma.04G104500/Glyma.06G030400/Glyma.06G105600	12
BP	GO:0000076	DNA replication checkpoint signaling	1/483	21/16967	0.867723	Glyma.10G227900	1
BP	GO:0006772	thiamine metabolic process	1/483	21/16967	0.867723	Glyma.08G277000	1
BP	GO:0006880	intracellular sequestering of iron ion	1/483	21/16967	0.867723	Glyma.11G232600	1
BP	GO:0007140	male meiotic nuclear division	1/483	21/16967	0.867723	Glyma.10G039500	1
BP	GO:0007276	gamete generation	1/483	21/16967	0.867723	Glyma.10G039500	1
BP	GO:0009414	response to water deprivation	1/483	21/16967	0.867723	Glyma.05G003900	1
BP	GO:0010941	regulation of cell death	1/483	21/16967	0.867723	Glyma.08G170400	1
BP	GO:0016109	tetraterpenoid biosynthetic process	1/483	21/16967	0.867723	Glyma.02G283400	1
BP	GO:0016117	carotenoid biosynthetic process	1/483	21/16967	0.867723	Glyma.02G283400	1
BP	GO:0022412	cellular process involved in reproduction in multicellular organism	1/483	21/16967	0.867723	Glyma.10G039500	1
BP	GO:0035999	tetrahydrofolate interconversion	1/483	21/16967	0.867723	Glyma.05G152100	1
BP	GO:0042723	thiamine-containing compound metabolic process	1/483	21/16967	0.867723	Glyma.08G277000	1
BP	GO:0042724	thiamine-containing compound biosynthetic process	1/483	21/16967	0.867723	Glyma.08G277000	1
BP	GO:0043622	cortical microtubule organization	1/483	21/16967	0.867723	Glyma.08G008600	1
BP	GO:0044728	DNA methylation or demethylation	1/483	21/16967	0.867723	Glyma.01G175300	1
BP	GO:0046470	phosphatidylcholine metabolic process	1/483	21/16967	0.867723	Glyma.04G020400	1
BP	GO:0048232	male gamete generation	1/483	21/16967	0.867723	Glyma.10G039500	1
BP	GO:0051238	sequestering of metal ion	1/483	21/16967	0.867723	Glyma.11G232600	1
BP	GO:0071482	cellular response to light stimulus	1/483	21/16967	0.867723	Glyma.03G081700	1
BP	GO:0097577	sequestering of iron ion	1/483	21/16967	0.867723	Glyma.11G232600	1
BP	GO:1901334	lactone metabolic process	1/483	21/16967	0.867723	Glyma.16G019900	1
BP	GO:0006890	retrograde vesicle-mediated transport, Golgi to endoplasmic reticulum	2/483	54/16967	0.869832	Glyma.15G008700/Glyma.20G158000	2
BP	GO:0007010	cytoskeleton organization	10/483	328/16967	0.869832	Glyma.08G161500/Glyma.05G218400/Glyma.17G092600/Glyma.08G008600/Glyma.10G286300/Glyma.05G085400/Glyma.14G085200/Glyma.14G005200/Glyma.15G266300/Glyma.09G013100	10
BP	GO:0009110	vitamin biosynthetic process	3/483	88/16967	0.871281	Glyma.16G019900/Glyma.08G277000/Glyma.16G034300	3
BP	GO:0009690	cytokinin metabolic process	2/483	55/16967	0.87345	Glyma.06G053000/Glyma.18G277500	2
BP	GO:0051049	regulation of transport	2/483	55/16967	0.87345	Glyma.18G277600/Glyma.09G198200	2
BP	GO:0006304	DNA modification	1/483	22/16967	0.87345	Glyma.01G175300	1
BP	GO:0006638	neutral lipid metabolic process	1/483	22/16967	0.87345	Glyma.09G239600	1
BP	GO:0006639	acylglycerol metabolic process	1/483	22/16967	0.87345	Glyma.09G239600	1
BP	GO:0006641	triglyceride metabolic process	1/483	22/16967	0.87345	Glyma.09G239600	1
BP	GO:0009415	response to water	1/483	22/16967	0.87345	Glyma.05G003900	1
BP	GO:0033962	P-body assembly	1/483	22/16967	0.87345	Glyma.01G153100	1
BP	GO:0090502	RNA phosphodiester bond hydrolysis, endonucleolytic	1/483	22/16967	0.87345	Glyma.17G000100	1
BP	GO:2000031	regulation of salicylic acid mediated signaling pathway	1/483	22/16967	0.87345	Glyma.05G196900	1
BP	GO:0034754	cellular hormone metabolic process	2/483	56/16967	0.8806	Glyma.06G053000/Glyma.18G277500	2
BP	GO:0042176	regulation of protein catabolic process	2/483	56/16967	0.8806	Glyma.03G134700/Glyma.08G228100	2
BP	GO:0009085	lysine biosynthetic process	1/483	23/16967	0.882084	Glyma.08G047800	1
BP	GO:0009396	folic acid-containing compound biosynthetic process	1/483	23/16967	0.882084	Glyma.16G034300	1
BP	GO:0030968	endoplasmic reticulum unfolded protein response	1/483	23/16967	0.882084	Glyma.16G111800	1
BP	GO:1901568	fatty acid derivative metabolic process	1/483	23/16967	0.882084	Glyma.03G221400	1
BP	GO:0015748	organophosphate ester transport	2/483	58/16967	0.882084	Glyma.04G129200/Glyma.04G144900	2
BP	GO:0090558	plant epidermis development	2/483	58/16967	0.882084	Glyma.18G295500/Glyma.08G345100	2
BP	GO:0051336	regulation of hydrolase activity	4/483	128/16967	0.882084	Glyma.07G243600/Glyma.15G145600/Glyma.09G040500/Glyma.07G243500	4
BP	GO:0001101	response to acid chemical	1/483	24/16967	0.882084	Glyma.05G003900	1
BP	GO:0006241	CTP biosynthetic process	1/483	24/16967	0.882084	Glyma.05G045200	1
BP	GO:0007135	meiosis II	1/483	24/16967	0.882084	Glyma.10G039500	1
BP	GO:0009148	pyrimidine nucleoside triphosphate biosynthetic process	1/483	24/16967	0.882084	Glyma.05G045200	1
BP	GO:0009208	pyrimidine ribonucleoside triphosphate metabolic process	1/483	24/16967	0.882084	Glyma.05G045200	1
BP	GO:0009209	pyrimidine ribonucleoside triphosphate biosynthetic process	1/483	24/16967	0.882084	Glyma.05G045200	1
BP	GO:0016108	tetraterpenoid metabolic process	1/483	24/16967	0.882084	Glyma.02G283400	1
BP	GO:0016116	carotenoid metabolic process	1/483	24/16967	0.882084	Glyma.02G283400	1
BP	GO:0034309	primary alcohol biosynthetic process	1/483	24/16967	0.882084	Glyma.08G277000	1
BP	GO:0046036	CTP metabolic process	1/483	24/16967	0.882084	Glyma.05G045200	1
BP	GO:0048229	gametophyte development	1/483	24/16967	0.882084	Glyma.08G241500	1
BP	GO:0061983	meiosis II cell cycle process	1/483	24/16967	0.882084	Glyma.10G039500	1
BP	GO:0070988	demethylation	1/483	24/16967	0.882084	Glyma.17G010600	1
BP	GO:0071214	cellular response to abiotic stimulus	1/483	24/16967	0.882084	Glyma.03G081700	1
BP	GO:0071478	cellular response to radiation	1/483	24/16967	0.882084	Glyma.03G081700	1
BP	GO:0104004	cellular response to environmental stimulus	1/483	24/16967	0.882084	Glyma.03G081700	1
BP	GO:0006163	purine nucleotide metabolic process	8/483	269/16967	0.882084	Glyma.11G111400/Glyma.11G247600/Glyma.09G153900/Glyma.19G017200/Glyma.08G345600/Glyma.04G104500/Glyma.06G105600/Glyma.05G045200	8
BP	GO:0006875	cellular metal ion homeostasis	3/483	94/16967	0.885434	Glyma.02G059200/Glyma.01G178500/Glyma.11G232600	3
BP	GO:0006094	gluconeogenesis	1/483	25/16967	0.892936	Glyma.19G017200	1
BP	GO:0006553	lysine metabolic process	1/483	25/16967	0.892936	Glyma.08G047800	1
BP	GO:0009065	glutamine family amino acid catabolic process	1/483	25/16967	0.892936	Glyma.08G091500	1
BP	GO:0009299	mRNA transcription	1/483	25/16967	0.892936	Glyma.19G165300	1
BP	GO:0019319	hexose biosynthetic process	1/483	25/16967	0.892936	Glyma.19G017200	1
BP	GO:0046185	aldehyde catabolic process	1/483	25/16967	0.892936	Glyma.14G156400	1
BP	GO:0048638	regulation of developmental growth	1/483	25/16967	0.892936	Glyma.08G272000	1
BP	GO:0006779	porphyrin-containing compound biosynthetic process	2/483	61/16967	0.898036	Glyma.04G050400/Glyma.02G218300	2
BP	GO:0006073	cellular glucan metabolic process	7/483	240/16967	0.898036	Glyma.04G111300/Glyma.11G253900/Glyma.02G068900/Glyma.01G196800/Glyma.09G062600/Glyma.20G141800/Glyma.06G030400	7
BP	GO:0000904	cell morphogenesis involved in differentiation	1/483	26/16967	0.898036	Glyma.18G295500	1
BP	GO:0005977	glycogen metabolic process	1/483	26/16967	0.898036	Glyma.06G030400	1
BP	GO:0006012	galactose metabolic process	1/483	26/16967	0.898036	Glyma.20G094500	1
BP	GO:0006020	inositol metabolic process	1/483	26/16967	0.898036	Glyma.14G072200	1
BP	GO:0006112	energy reserve metabolic process	1/483	26/16967	0.898036	Glyma.06G030400	1
BP	GO:0009863	salicylic acid mediated signaling pathway	1/483	26/16967	0.898036	Glyma.05G196900	1
BP	GO:0050821	protein stabilization	1/483	26/16967	0.898036	Glyma.16G178800	1
BP	GO:0060627	regulation of vesicle-mediated transport	1/483	26/16967	0.898036	Glyma.09G198200	1
BP	GO:0071446	cellular response to salicylic acid stimulus	1/483	26/16967	0.898036	Glyma.05G196900	1
BP	GO:0033014	tetrapyrrole biosynthetic process	2/483	62/16967	0.899905	Glyma.04G050400/Glyma.02G218300	2
BP	GO:0045490	pectin catabolic process	4/483	134/16967	0.900619	Glyma.15G110500/Glyma.11G244900/Glyma.18G175300/Glyma.15G184400	4
BP	GO:0022414	reproductive process	12/483	419/16967	0.900619	Glyma.08G272000/Glyma.06G294500/Glyma.12G140200/Glyma.13G303800/Glyma.15G064900/Glyma.13G248900/Glyma.06G258200/Glyma.08G255200/Glyma.17G211900/Glyma.03G054900/Glyma.02G157700/Glyma.10G039500	12
BP	GO:0044262	cellular carbohydrate metabolic process	13/483	456/16967	0.900619	Glyma.04G111300/Glyma.11G253900/Glyma.19G038400/Glyma.09G231400/Glyma.04G180900/Glyma.14G072200/Glyma.02G068900/Glyma.01G196800/Glyma.11G251000/Glyma.09G062600/Glyma.20G141800/Glyma.14G171700/Glyma.06G030400	13
BP	GO:0006006	glucose metabolic process	2/483	63/16967	0.900619	Glyma.11G247600/Glyma.19G017200	2
BP	GO:2000241	regulation of reproductive process	2/483	63/16967	0.900619	Glyma.08G272000/Glyma.08G255200	2
BP	GO:0009395	phospholipid catabolic process	1/483	27/16967	0.900619	Glyma.04G020400	1
BP	GO:0016998	cell wall macromolecule catabolic process	1/483	27/16967	0.900619	Glyma.02G042500	1
BP	GO:0019344	cysteine biosynthetic process	1/483	27/16967	0.900619	Glyma.13G001200	1
BP	GO:0031145	anaphase-promoting complex-dependent catabolic process	1/483	27/16967	0.900619	Glyma.08G228100	1
BP	GO:0042559	pteridine-containing compound biosynthetic process	1/483	27/16967	0.900619	Glyma.16G034300	1
BP	GO:0045927	positive regulation of growth	1/483	27/16967	0.900619	Glyma.17G258400	1
BP	GO:0000003	reproduction	12/483	422/16967	0.901043	Glyma.08G272000/Glyma.06G294500/Glyma.12G140200/Glyma.13G303800/Glyma.15G064900/Glyma.13G248900/Glyma.06G258200/Glyma.08G255200/Glyma.17G211900/Glyma.03G054900/Glyma.02G157700/Glyma.10G039500	12
BP	GO:0070646	protein modification by small protein removal	4/483	136/16967	0.901471	Glyma.09G204600/Glyma.17G201000/Glyma.15G248200/Glyma.14G132500	4
BP	GO:0015698	inorganic anion transport	2/483	64/16967	0.903674	Glyma.18G141900/Glyma.19G164300	2
BP	GO:0032879	regulation of localization	2/483	64/16967	0.903674	Glyma.18G277600/Glyma.09G198200	2
BP	GO:0022900	electron transport chain	3/483	101/16967	0.907355	Glyma.10G136300/Glyma.20G085900/Glyma.01G230900	3
BP	GO:0000959	mitochondrial RNA metabolic process	1/483	28/16967	0.907355	Glyma.19G005800	1
BP	GO:0006002	fructose 6-phosphate metabolic process	1/483	28/16967	0.907355	Glyma.05G224900	1
BP	GO:0030261	chromosome condensation	1/483	28/16967	0.907355	Glyma.02G157700	1
BP	GO:0031647	regulation of protein stability	1/483	28/16967	0.907355	Glyma.16G178800	1
BP	GO:0006470	protein dephosphorylation	4/483	138/16967	0.907367	Glyma.07G243600/Glyma.15G145600/Glyma.09G040500/Glyma.07G243500	4
BP	GO:1903046	meiotic cell cycle process	3/483	103/16967	0.910044	Glyma.17G211900/Glyma.02G157700/Glyma.10G039500	3
BP	GO:0044042	glucan metabolic process	7/483	249/16967	0.910044	Glyma.04G111300/Glyma.11G253900/Glyma.02G068900/Glyma.01G196800/Glyma.09G062600/Glyma.20G141800/Glyma.06G030400	7
BP	GO:0003333	amino acid transmembrane transport	1/483	29/16967	0.910044	Glyma.18G277600	1
BP	GO:0006536	glutamate metabolic process	1/483	29/16967	0.910044	Glyma.08G091500	1
BP	GO:0017004	cytochrome complex assembly	1/483	29/16967	0.910044	Glyma.11G235000	1
BP	GO:0030245	cellulose catabolic process	1/483	29/16967	0.910044	Glyma.04G111300	1
BP	GO:0031570	DNA integrity checkpoint signaling	1/483	29/16967	0.910044	Glyma.10G227900	1
BP	GO:0034308	primary alcohol metabolic process	1/483	29/16967	0.910044	Glyma.08G277000	1
BP	GO:0044403	biological process involved in symbiotic interaction	1/483	29/16967	0.910044	Glyma.05G196900	1
BP	GO:0051275	beta-glucan catabolic process	1/483	29/16967	0.910044	Glyma.04G111300	1
BP	GO:0009791	post-embryonic development	7/483	251/16967	0.915241	Glyma.08G272000/Glyma.13G276700/Glyma.08G345100/Glyma.12G224600/Glyma.03G081700/Glyma.08G255200/Glyma.11G074900	7
BP	GO:0008283	cell population proliferation	1/483	30/16967	0.915241	Glyma.17G159000	1
BP	GO:0009147	pyrimidine nucleoside triphosphate metabolic process	1/483	30/16967	0.915241	Glyma.05G045200	1
BP	GO:0009909	regulation of flower development	1/483	30/16967	0.915241	Glyma.08G255200	1
BP	GO:0032392	DNA geometric change	1/483	30/16967	0.915241	Glyma.10G148300	1
BP	GO:0032508	DNA duplex unwinding	1/483	30/16967	0.915241	Glyma.10G148300	1
BP	GO:0042398	cellular modified amino acid biosynthetic process	1/483	30/16967	0.915241	Glyma.16G034300	1
BP	GO:0048831	regulation of shoot system development	1/483	30/16967	0.915241	Glyma.08G255200	1
BP	GO:0090329	regulation of DNA-dependent DNA replication	1/483	30/16967	0.915241	Glyma.10G227900	1
BP	GO:0009308	amine metabolic process	4/483	143/16967	0.920281	Glyma.06G053000/Glyma.18G045100/Glyma.18G277500/Glyma.05G036300	4
BP	GO:0034605	cellular response to heat	1/483	31/16967	0.926085	Glyma.16G178800	1
BP	GO:0048468	cell development	1/483	31/16967	0.926085	Glyma.18G295500	1
BP	GO:0097237	cellular response to toxic substance	1/483	31/16967	0.926085	Glyma.14G156400	1
BP	GO:1990748	cellular detoxification	1/483	31/16967	0.926085	Glyma.14G156400	1
BP	GO:0010629	negative regulation of gene expression	6/483	219/16967	0.929668	Glyma.09G025400/Glyma.03G262100/Glyma.19G261200/Glyma.17G104100/Glyma.19G005800/Glyma.06G213300	6
BP	GO:0044275	cellular carbohydrate catabolic process	2/483	70/16967	0.930102	Glyma.04G111300/Glyma.19G038400	2
BP	GO:0006596	polyamine biosynthetic process	1/483	32/16967	0.934557	Glyma.05G036300	1
BP	GO:0009751	response to salicylic acid	1/483	32/16967	0.934557	Glyma.05G196900	1
BP	GO:0040007	growth	3/483	109/16967	0.934557	Glyma.08G272000/Glyma.01G044800/Glyma.17G258400	3
BP	GO:0010393	galacturonan metabolic process	5/483	185/16967	0.934557	Glyma.15G110500/Glyma.11G244900/Glyma.08G309900/Glyma.18G175300/Glyma.15G184400	5
BP	GO:0045488	pectin metabolic process	5/483	185/16967	0.934557	Glyma.15G110500/Glyma.11G244900/Glyma.08G309900/Glyma.18G175300/Glyma.15G184400	5
BP	GO:0072521	purine-containing compound metabolic process	8/483	296/16967	0.934557	Glyma.11G111400/Glyma.11G247600/Glyma.09G153900/Glyma.19G017200/Glyma.08G345600/Glyma.04G104500/Glyma.06G105600/Glyma.05G045200	8
BP	GO:0009117	nucleotide metabolic process	10/483	371/16967	0.934557	Glyma.11G111400/Glyma.11G247600/Glyma.17G150300/Glyma.05G042400/Glyma.09G153900/Glyma.19G017200/Glyma.08G345600/Glyma.04G104500/Glyma.06G105600/Glyma.05G045200	10
BP	GO:0006879	cellular iron ion homeostasis	1/483	33/16967	0.934557	Glyma.11G232600	1
BP	GO:0009685	gibberellin metabolic process	1/483	33/16967	0.934557	Glyma.13G218200	1
BP	GO:0009902	chloroplast relocation	1/483	33/16967	0.934557	Glyma.05G218400	1
BP	GO:0016101	diterpenoid metabolic process	1/483	33/16967	0.934557	Glyma.13G218200	1
BP	GO:0019750	chloroplast localization	1/483	33/16967	0.934557	Glyma.05G218400	1
BP	GO:0051644	plastid localization	1/483	33/16967	0.934557	Glyma.05G218400	1
BP	GO:0051667	establishment of plastid localization	1/483	33/16967	0.934557	Glyma.05G218400	1
BP	GO:0098754	detoxification	1/483	33/16967	0.934557	Glyma.14G156400	1
BP	GO:0055065	metal ion homeostasis	3/483	111/16967	0.934833	Glyma.02G059200/Glyma.01G178500/Glyma.11G232600	3
BP	GO:0019318	hexose metabolic process	5/483	187/16967	0.937225	Glyma.02G046800/Glyma.11G247600/Glyma.02G123200/Glyma.19G017200/Glyma.20G094500	5
BP	GO:0009259	ribonucleotide metabolic process	8/483	299/16967	0.937756	Glyma.11G111400/Glyma.11G247600/Glyma.09G153900/Glyma.19G017200/Glyma.08G345600/Glyma.04G104500/Glyma.06G105600/Glyma.05G045200	8
BP	GO:0044272	sulfur compound biosynthetic process	4/483	150/16967	0.937756	Glyma.08G047800/Glyma.13G001200/Glyma.08G277000/Glyma.16G038300	4
BP	GO:0009064	glutamine family amino acid metabolic process	3/483	112/16967	0.937756	Glyma.08G091500/Glyma.18G061100/Glyma.11G170300	3
BP	GO:0000266	mitochondrial fission	1/483	34/16967	0.941721	Glyma.07G120900	1
BP	GO:0072528	pyrimidine-containing compound biosynthetic process	2/483	74/16967	0.941721	Glyma.08G277000/Glyma.05G045200	2
BP	GO:0019220	regulation of phosphate metabolic process	4/483	152/16967	0.946665	Glyma.07G243600/Glyma.15G145600/Glyma.09G040500/Glyma.07G243500	4
BP	GO:0051174	regulation of phosphorus metabolic process	4/483	152/16967	0.946665	Glyma.07G243600/Glyma.15G145600/Glyma.09G040500/Glyma.07G243500	4
BP	GO:0006576	cellular biogenic amine metabolic process	2/483	75/16967	0.946833	Glyma.18G045100/Glyma.05G036300	2
BP	GO:0006534	cysteine metabolic process	1/483	35/16967	0.946833	Glyma.13G001200	1
BP	GO:0043647	inositol phosphate metabolic process	1/483	35/16967	0.946833	Glyma.14G072200	1
BP	GO:0070192	chromosome organization involved in meiotic cell cycle	1/483	35/16967	0.946833	Glyma.02G157700	1
BP	GO:0044106	cellular amine metabolic process	2/483	76/16967	0.948248	Glyma.18G045100/Glyma.05G036300	2
BP	GO:0044264	cellular polysaccharide metabolic process	8/483	305/16967	0.948248	Glyma.04G111300/Glyma.11G253900/Glyma.02G068900/Glyma.01G196800/Glyma.11G251000/Glyma.09G062600/Glyma.20G141800/Glyma.06G030400	8
BP	GO:0051640	organelle localization	5/483	193/16967	0.948248	Glyma.08G161500/Glyma.05G218400/Glyma.10G082500/Glyma.10G286300/Glyma.15G266300	5
BP	GO:0006098	pentose-phosphate shunt	1/483	36/16967	0.948248	Glyma.19G038400	1
BP	GO:0010374	stomatal complex development	1/483	36/16967	0.948248	Glyma.08G345100	1
BP	GO:0018022	peptidyl-lysine methylation	1/483	36/16967	0.948248	Glyma.10G292500	1
BP	GO:0032504	multicellular organism reproduction	1/483	36/16967	0.948248	Glyma.10G039500	1
BP	GO:0034620	cellular response to unfolded protein	1/483	36/16967	0.948248	Glyma.16G111800	1
BP	GO:0048609	multicellular organismal reproductive process	1/483	36/16967	0.948248	Glyma.10G039500	1
BP	GO:0046165	alcohol biosynthetic process	2/483	78/16967	0.953759	Glyma.14G072200/Glyma.08G277000	2
BP	GO:0006275	regulation of DNA replication	1/483	37/16967	0.953759	Glyma.10G227900	1
BP	GO:0006740	NADPH regeneration	1/483	37/16967	0.953759	Glyma.19G038400	1
BP	GO:0006817	phosphate ion transport	1/483	37/16967	0.953759	Glyma.19G164300	1
BP	GO:0006986	response to unfolded protein	1/483	37/16967	0.953759	Glyma.16G111800	1
BP	GO:0048366	leaf development	1/483	37/16967	0.953759	Glyma.14G215400	1
BP	GO:0030865	cortical cytoskeleton organization	1/483	38/16967	0.965965	Glyma.08G008600	1
BP	GO:0019693	ribose phosphate metabolic process	8/483	312/16967	0.965965	Glyma.11G111400/Glyma.11G247600/Glyma.09G153900/Glyma.19G017200/Glyma.08G345600/Glyma.04G104500/Glyma.06G105600/Glyma.05G045200	8
BP	GO:1901136	carbohydrate derivative catabolic process	2/483	80/16967	0.966535	Glyma.17G217000/Glyma.02G042500	2
BP	GO:0006753	nucleoside phosphate metabolic process	10/483	389/16967	0.966771	Glyma.11G111400/Glyma.11G247600/Glyma.17G150300/Glyma.05G042400/Glyma.09G153900/Glyma.19G017200/Glyma.08G345600/Glyma.04G104500/Glyma.06G105600/Glyma.05G045200	10
BP	GO:0008299	isoprenoid biosynthetic process	3/483	121/16967	0.966771	Glyma.02G283400/Glyma.08G277000/Glyma.13G262200	3
BP	GO:0016114	terpenoid biosynthetic process	2/483	81/16967	0.966771	Glyma.02G283400/Glyma.08G277000	2
BP	GO:0010038	response to metal ion	1/483	39/16967	0.966771	Glyma.07G139700	1
BP	GO:0033108	mitochondrial respiratory chain complex assembly	1/483	39/16967	0.966771	Glyma.11G235000	1
BP	GO:0046173	polyol biosynthetic process	1/483	39/16967	0.966771	Glyma.14G072200	1
BP	GO:0071396	cellular response to lipid	4/483	161/16967	0.966771	Glyma.07G243600/Glyma.15G145600/Glyma.09G040500/Glyma.07G243500	4
BP	GO:0007131	reciprocal meiotic recombination	1/483	40/16967	0.9688	Glyma.17G211900	1
BP	GO:0009145	purine nucleoside triphosphate biosynthetic process	1/483	40/16967	0.9688	Glyma.05G045200	1
BP	GO:0009205	purine ribonucleoside triphosphate metabolic process	1/483	40/16967	0.9688	Glyma.05G045200	1
BP	GO:0009206	purine ribonucleoside triphosphate biosynthetic process	1/483	40/16967	0.9688	Glyma.05G045200	1
BP	GO:0010087	phloem or xylem histogenesis	1/483	40/16967	0.9688	Glyma.20G204500	1
BP	GO:0035825	homologous recombination	1/483	40/16967	0.9688	Glyma.17G211900	1
BP	GO:0140527	reciprocal homologous recombination	1/483	40/16967	0.9688	Glyma.17G211900	1
BP	GO:0031399	regulation of protein modification process	4/483	164/16967	0.974392	Glyma.07G243600/Glyma.15G145600/Glyma.09G040500/Glyma.07G243500	4
BP	GO:0046486	glycerolipid metabolic process	5/483	204/16967	0.9754	Glyma.20G170500/Glyma.04G020400/Glyma.07G107000/Glyma.08G241500/Glyma.09G239600	5
BP	GO:0031122	cytoplasmic microtubule organization	1/483	41/16967	0.9754	Glyma.08G008600	1
BP	GO:0044247	cellular polysaccharide catabolic process	1/483	41/16967	0.9754	Glyma.04G111300	1
BP	GO:0002229	defense response to oomycetes	1/483	42/16967	0.977045	Glyma.03G051100	1
BP	GO:0002239	response to oomycetes	1/483	42/16967	0.977045	Glyma.03G051100	1
BP	GO:0007166	cell surface receptor signaling pathway	1/483	42/16967	0.977045	Glyma.01G182400	1
BP	GO:0022622	root system development	1/483	42/16967	0.977045	Glyma.08G329900	1
BP	GO:0042775	mitochondrial ATP synthesis coupled electron transport	1/483	42/16967	0.977045	Glyma.01G230900	1
BP	GO:0045489	pectin biosynthetic process	1/483	42/16967	0.977045	Glyma.08G309900	1
BP	GO:0048364	root development	1/483	42/16967	0.977045	Glyma.08G329900	1
BP	GO:0046488	phosphatidylinositol metabolic process	3/483	127/16967	0.978304	Glyma.20G170500/Glyma.07G107000/Glyma.08G241500	3
BP	GO:0140013	meiotic nuclear division	2/483	86/16967	0.979544	Glyma.17G211900/Glyma.10G039500	2
BP	GO:0009144	purine nucleoside triphosphate metabolic process	1/483	43/16967	0.979801	Glyma.05G045200	1
BP	GO:0009218	pyrimidine ribonucleotide metabolic process	1/483	43/16967	0.979801	Glyma.05G045200	1
BP	GO:0009220	pyrimidine ribonucleotide biosynthetic process	1/483	43/16967	0.979801	Glyma.05G045200	1
BP	GO:0019646	aerobic electron transport chain	1/483	43/16967	0.979801	Glyma.01G230900	1
BP	GO:0016051	carbohydrate biosynthetic process	8/483	326/16967	0.981511	Glyma.08G309900/Glyma.09G231400/Glyma.04G180900/Glyma.19G017200/Glyma.16G019900/Glyma.11G251000/Glyma.14G171700/Glyma.06G030400	8
BP	GO:0046777	protein autophosphorylation	4/483	171/16967	0.988622	Glyma.08G128900/Glyma.10G217000/Glyma.08G284100/Glyma.11G204800	4
BP	GO:0006887	exocytosis	2/483	89/16967	0.988622	Glyma.10G082500/Glyma.09G198200	2
BP	GO:0007051	spindle organization	2/483	89/16967	0.988622	Glyma.05G085400/Glyma.14G085200	2
BP	GO:0031331	positive regulation of cellular catabolic process	2/483	89/16967	0.988622	Glyma.03G134700/Glyma.08G228100	2
BP	GO:1990542	mitochondrial transmembrane transport	2/483	89/16967	0.988622	Glyma.02G059200/Glyma.01G178500	2
BP	GO:0046916	cellular transition metal ion homeostasis	1/483	45/16967	0.988622	Glyma.11G232600	1
BP	GO:1903825	organic acid transmembrane transport	1/483	45/16967	0.988622	Glyma.18G277600	1
BP	GO:1905039	carboxylic acid transmembrane transport	1/483	45/16967	0.988622	Glyma.18G277600	1
BP	GO:0009733	response to auxin	10/483	410/16967	0.993049	Glyma.07G139700/Glyma.06G079200/Glyma.13G113800/Glyma.06G025300/Glyma.01G063800/Glyma.01G157700/Glyma.06G006500/Glyma.06G156600/Glyma.18G029000/Glyma.10G109500	10
BP	GO:0000041	transition metal ion transport	1/483	46/16967	0.993049	Glyma.11G232600	1
BP	GO:0042537	benzene-containing compound metabolic process	1/483	46/16967	0.993049	Glyma.02G309300	1
BP	GO:0051321	meiotic cell cycle	3/483	134/16967	0.993049	Glyma.17G211900/Glyma.02G157700/Glyma.10G039500	3
BP	GO:0032270	positive regulation of cellular protein metabolic process	2/483	92/16967	0.993049	Glyma.03G134700/Glyma.08G228100	2
BP	GO:0006479	protein methylation	1/483	47/16967	0.993049	Glyma.10G292500	1
BP	GO:0008213	protein alkylation	1/483	47/16967	0.993049	Glyma.10G292500	1
BP	GO:0019252	starch biosynthetic process	1/483	47/16967	0.993049	Glyma.06G030400	1
BP	GO:0043086	negative regulation of catalytic activity	1/483	47/16967	0.993049	Glyma.06G319300	1
BP	GO:0044092	negative regulation of molecular function	1/483	47/16967	0.993049	Glyma.06G319300	1
BP	GO:0055072	iron ion homeostasis	1/483	47/16967	0.993049	Glyma.11G232600	1
BP	GO:0009735	response to cytokinin	1/483	48/16967	0.999897	Glyma.07G139700	1
BP	GO:0045492	xylan biosynthetic process	1/483	48/16967	0.999897	Glyma.11G251000	1
BP	GO:0044242	cellular lipid catabolic process	2/483	94/16967	0.999978	Glyma.04G020400/Glyma.13G218200	2
BP	GO:0072527	pyrimidine-containing compound metabolic process	2/483	95/16967	0.999978	Glyma.08G277000/Glyma.05G045200	2
BP	GO:0007127	meiosis I	1/483	49/16967	0.999978	Glyma.17G211900	1
BP	GO:0009739	response to gibberellin	1/483	49/16967	0.999978	Glyma.07G139700	1
BP	GO:0006261	DNA-dependent DNA replication	3/483	139/16967	0.999978	Glyma.10G148300/Glyma.06G155300/Glyma.10G227900	3
BP	GO:0006221	pyrimidine nucleotide biosynthetic process	1/483	50/16967	0.999978	Glyma.05G045200	1
BP	GO:0009251	glucan catabolic process	1/483	50/16967	0.999978	Glyma.04G111300	1
BP	GO:0090501	RNA phosphodiester bond hydrolysis	1/483	50/16967	0.999978	Glyma.17G000100	1
BP	GO:0006650	glycerophospholipid metabolic process	4/483	182/16967	0.999978	Glyma.20G170500/Glyma.04G020400/Glyma.07G107000/Glyma.08G241500	4
BP	GO:0048284	organelle fusion	2/483	97/16967	0.999978	Glyma.09G153900/Glyma.10G082500	2
BP	GO:0000075	cell cycle checkpoint signaling	1/483	51/16967	0.999978	Glyma.10G227900	1
BP	GO:0006739	NADP metabolic process	1/483	51/16967	0.999978	Glyma.19G038400	1
BP	GO:0090626	plant epidermis morphogenesis	1/483	51/16967	0.999978	Glyma.18G295500	1
BP	GO:0140053	mitochondrial gene expression	1/483	51/16967	0.999978	Glyma.19G005800	1
BP	GO:0009896	positive regulation of catabolic process	2/483	99/16967	0.999978	Glyma.03G134700/Glyma.08G228100	2
BP	GO:0005982	starch metabolic process	1/483	52/16967	0.999978	Glyma.06G030400	1
BP	GO:0006891	intra-Golgi vesicle-mediated transport	1/483	52/16967	0.999978	Glyma.15G008700	1
BP	GO:0009309	amine biosynthetic process	1/483	52/16967	0.999978	Glyma.05G036300	1
BP	GO:0042401	cellular biogenic amine biosynthetic process	1/483	52/16967	0.999978	Glyma.05G036300	1
BP	GO:0032940	secretion by cell	2/483	100/16967	0.999978	Glyma.10G082500/Glyma.09G198200	2
BP	GO:0048827	phyllome development	1/483	53/16967	0.999978	Glyma.14G215400	1
BP	GO:0051651	maintenance of location in cell	1/483	53/16967	0.999978	Glyma.11G232600	1
BP	GO:0072583	clathrin-dependent endocytosis	1/483	53/16967	0.999978	Glyma.04G033500	1
BP	GO:0006289	nucleotide-excision repair	1/483	54/16967	0.999978	Glyma.06G155300	1
BP	GO:0048589	developmental growth	1/483	54/16967	0.999978	Glyma.08G272000	1
BP	GO:0051261	protein depolymerization	1/483	54/16967	0.999978	Glyma.04G033500	1
BP	GO:0071407	cellular response to organic cyclic compound	1/483	54/16967	0.999978	Glyma.05G196900	1
BP	GO:1901988	negative regulation of cell cycle phase transition	1/483	54/16967	0.999978	Glyma.10G227900	1
BP	GO:0009734	auxin-activated signaling pathway	9/483	393/16967	0.999978	Glyma.06G079200/Glyma.13G113800/Glyma.06G025300/Glyma.01G063800/Glyma.01G157700/Glyma.06G006500/Glyma.06G156600/Glyma.18G029000/Glyma.10G109500	9
BP	GO:0071365	cellular response to auxin stimulus	9/483	393/16967	0.999978	Glyma.06G079200/Glyma.13G113800/Glyma.06G025300/Glyma.01G063800/Glyma.01G157700/Glyma.06G006500/Glyma.06G156600/Glyma.18G029000/Glyma.10G109500	9
BP	GO:0032984	protein-containing complex disassembly	2/483	102/16967	0.999978	Glyma.04G033500/Glyma.04G195200	2
BP	GO:0051247	positive regulation of protein metabolic process	2/483	102/16967	0.999978	Glyma.03G134700/Glyma.08G228100	2
BP	GO:0006066	alcohol metabolic process	3/483	147/16967	0.999978	Glyma.16G109300/Glyma.14G072200/Glyma.08G277000	3
BP	GO:0045893	positive regulation of transcription, DNA-templated	10/483	434/16967	0.999978	Glyma.05G157000/Glyma.04G214600/Glyma.17G192800/Glyma.17G096700/Glyma.06G143700/Glyma.03G081700/Glyma.04G195200/Glyma.11G041300/Glyma.05G070200/Glyma.06G151500	10
BP	GO:1902680	positive regulation of RNA biosynthetic process	10/483	434/16967	0.999978	Glyma.05G157000/Glyma.04G214600/Glyma.17G192800/Glyma.17G096700/Glyma.06G143700/Glyma.03G081700/Glyma.04G195200/Glyma.11G041300/Glyma.05G070200/Glyma.06G151500	10
BP	GO:1903508	positive regulation of nucleic acid-templated transcription	10/483	434/16967	0.999978	Glyma.05G157000/Glyma.04G214600/Glyma.17G192800/Glyma.17G096700/Glyma.06G143700/Glyma.03G081700/Glyma.04G195200/Glyma.11G041300/Glyma.05G070200/Glyma.06G151500	10
BP	GO:0019684	photosynthesis, light reaction	2/483	103/16967	0.999978	Glyma.10G136300/Glyma.20G085900	2
BP	GO:0006220	pyrimidine nucleotide metabolic process	1/483	55/16967	0.999978	Glyma.05G045200	1
BP	GO:0042773	ATP synthesis coupled electron transport	1/483	55/16967	0.999978	Glyma.01G230900	1
BP	GO:0098656	anion transmembrane transport	1/483	55/16967	0.999978	Glyma.09G010700	1
BP	GO:0034637	cellular carbohydrate biosynthetic process	5/483	233/16967	0.999978	Glyma.09G231400/Glyma.04G180900/Glyma.11G251000/Glyma.14G171700/Glyma.06G030400	5
BP	GO:0009199	ribonucleoside triphosphate metabolic process	1/483	56/16967	0.999978	Glyma.05G045200	1
BP	GO:0009201	ribonucleoside triphosphate biosynthetic process	1/483	56/16967	0.999978	Glyma.05G045200	1
BP	GO:0048646	anatomical structure formation involved in morphogenesis	1/483	56/16967	0.999978	Glyma.06G294500	1
BP	GO:0051052	regulation of DNA metabolic process	1/483	56/16967	0.999978	Glyma.01G175300	1
BP	GO:0061982	meiosis I cell cycle process	1/483	56/16967	0.999978	Glyma.17G211900	1
BP	GO:0006730	one-carbon metabolic process	1/483	57/16967	0.999978	Glyma.05G152100	1
BP	GO:0048316	seed development	1/483	57/16967	0.999978	Glyma.08G272000	1
BP	GO:0034976	response to endoplasmic reticulum stress	2/483	106/16967	0.999978	Glyma.11G146800/Glyma.16G111800	2
BP	GO:0046903	secretion	2/483	106/16967	0.999978	Glyma.10G082500/Glyma.09G198200	2
BP	GO:0031329	regulation of cellular catabolic process	2/483	107/16967	0.999978	Glyma.03G134700/Glyma.08G228100	2
BP	GO:0010154	fruit development	1/483	58/16967	0.999978	Glyma.08G272000	1
BP	GO:0019439	aromatic compound catabolic process	6/483	281/16967	0.999978	Glyma.14G062300/Glyma.11G137500/Glyma.14G198900/Glyma.02G309300/Glyma.19G005800/Glyma.02G231600	6
BP	GO:0006281	DNA repair	8/483	364/16967	0.999978	Glyma.09G018700/Glyma.10G148300/Glyma.14G193200/Glyma.04G074500/Glyma.06G155300/Glyma.11G029500/Glyma.10G227900/Glyma.02G226300	8
BP	GO:0007033	vacuole organization	1/483	59/16967	0.999978	Glyma.09G153900	1
BP	GO:0015980	energy derivation by oxidation of organic compounds	3/483	155/16967	0.999978	Glyma.04G123800/Glyma.01G230900/Glyma.06G030400	3
BP	GO:0006405	RNA export from nucleus	1/483	60/16967	0.999978	Glyma.15G051700	1
BP	GO:0009142	nucleoside triphosphate biosynthetic process	1/483	60/16967	0.999978	Glyma.05G045200	1
BP	GO:0048523	negative regulation of cellular process	8/483	367/16967	0.999978	Glyma.06G204100/Glyma.04G214600/Glyma.15G014500/Glyma.01G060300/Glyma.10G227900/Glyma.03G084300/Glyma.02G118500/Glyma.06G151500	8
BP	GO:0006119	oxidative phosphorylation	1/483	61/16967	0.999978	Glyma.01G230900	1
BP	GO:0055076	transition metal ion homeostasis	1/483	61/16967	0.999978	Glyma.11G232600	1
BP	GO:0010608	posttranscriptional regulation of gene expression	4/483	202/16967	0.999978	Glyma.09G025400/Glyma.03G262100/Glyma.19G261200/Glyma.17G104100	4
BP	GO:0006081	cellular aldehyde metabolic process	1/483	62/16967	0.999978	Glyma.14G156400	1
BP	GO:0014070	response to organic cyclic compound	1/483	62/16967	0.999978	Glyma.05G196900	1
BP	GO:0051084	'de novo' posttranslational protein folding	1/483	62/16967	0.999978	Glyma.18G127500	1
BP	GO:0051085	chaperone cofactor-dependent protein refolding	1/483	62/16967	0.999978	Glyma.18G127500	1
BP	GO:0071103	DNA conformation change	2/483	113/16967	0.999978	Glyma.10G148300/Glyma.02G157700	2
BP	GO:0022904	respiratory electron transport chain	1/483	63/16967	0.999978	Glyma.01G230900	1
BP	GO:0045491	xylan metabolic process	1/483	63/16967	0.999978	Glyma.11G251000	1
BP	GO:1901361	organic cyclic compound catabolic process	6/483	291/16967	0.999978	Glyma.14G062300/Glyma.11G137500/Glyma.14G198900/Glyma.02G309300/Glyma.19G005800/Glyma.02G231600	6
BP	GO:0006352	DNA-templated transcription, initiation	2/483	114/16967	0.999978	Glyma.06G125700/Glyma.14G160600	2
BP	GO:0000470	maturation of LSU-rRNA	1/483	65/16967	0.999978	Glyma.12G009600	1
BP	GO:0051235	maintenance of location	1/483	65/16967	0.999978	Glyma.11G232600	1
BP	GO:0010948	negative regulation of cell cycle process	1/483	66/16967	0.999978	Glyma.10G227900	1
BP	GO:0018298	protein-chromophore linkage	1/483	66/16967	0.999978	Glyma.04G074500	1
BP	GO:0009116	nucleoside metabolic process	1/483	67/16967	0.999978	Glyma.07G083900	1
BP	GO:0009834	plant-type secondary cell wall biogenesis	1/483	67/16967	0.999978	Glyma.11G251000	1
BP	GO:0010557	positive regulation of macromolecule biosynthetic process	10/483	466/16967	0.999978	Glyma.05G157000/Glyma.04G214600/Glyma.17G192800/Glyma.17G096700/Glyma.06G143700/Glyma.03G081700/Glyma.04G195200/Glyma.11G041300/Glyma.05G070200/Glyma.06G151500	10
BP	GO:0006333	chromatin assembly or disassembly	1/483	68/16967	0.999978	Glyma.04G195200	1
BP	GO:0006458	'de novo' protein folding	1/483	68/16967	0.999978	Glyma.18G127500	1
BP	GO:0006974	cellular response to DNA damage stimulus	8/483	385/16967	0.999978	Glyma.09G018700/Glyma.10G148300/Glyma.14G193200/Glyma.04G074500/Glyma.06G155300/Glyma.11G029500/Glyma.10G227900/Glyma.02G226300	8
BP	GO:0009891	positive regulation of biosynthetic process	10/483	468/16967	0.999978	Glyma.05G157000/Glyma.04G214600/Glyma.17G192800/Glyma.17G096700/Glyma.06G143700/Glyma.03G081700/Glyma.04G195200/Glyma.11G041300/Glyma.05G070200/Glyma.06G151500	10
BP	GO:0031328	positive regulation of cellular biosynthetic process	10/483	468/16967	0.999978	Glyma.05G157000/Glyma.04G214600/Glyma.17G192800/Glyma.17G096700/Glyma.06G143700/Glyma.03G081700/Glyma.04G195200/Glyma.11G041300/Glyma.05G070200/Glyma.06G151500	10
BP	GO:0048278	vesicle docking	1/483	69/16967	0.999978	Glyma.10G082500	1
BP	GO:0009060	aerobic respiration	2/483	122/16967	0.999978	Glyma.04G123800/Glyma.01G230900	2
BP	GO:0043414	macromolecule methylation	2/483	122/16967	0.999978	Glyma.01G175300/Glyma.10G292500	2
BP	GO:0006906	vesicle fusion	1/483	70/16967	0.999978	Glyma.10G082500	1
BP	GO:0006004	fucose metabolic process	1/483	71/16967	0.999978	Glyma.02G123200	1
BP	GO:0006323	DNA packaging	1/483	71/16967	0.999978	Glyma.02G157700	1
BP	GO:0009141	nucleoside triphosphate metabolic process	1/483	71/16967	0.999978	Glyma.05G045200	1
BP	GO:0009894	regulation of catabolic process	2/483	125/16967	0.999978	Glyma.03G134700/Glyma.08G228100	2
BP	GO:0006898	receptor-mediated endocytosis	1/483	72/16967	0.999978	Glyma.04G033500	1
BP	GO:0045786	negative regulation of cell cycle	1/483	72/16967	0.999978	Glyma.10G227900	1
BP	GO:0099402	plant organ development	2/483	126/16967	0.999978	Glyma.08G329900/Glyma.14G215400	2
BP	GO:0043624	cellular protein complex disassembly	1/483	74/16967	0.999978	Glyma.04G033500	1
BP	GO:0000226	microtubule cytoskeleton organization	3/483	177/16967	0.999978	Glyma.08G008600/Glyma.05G085400/Glyma.14G085200	3
BP	GO:0045333	cellular respiration	2/483	129/16967	0.999978	Glyma.04G123800/Glyma.01G230900	2
BP	GO:0090174	organelle membrane fusion	1/483	75/16967	0.999978	Glyma.10G082500	1
BP	GO:0048367	shoot system development	3/483	179/16967	0.999978	Glyma.08G329900/Glyma.08G255200/Glyma.14G215400	3
BP	GO:0050657	nucleic acid transport	1/483	76/16967	0.999978	Glyma.15G051700	1
BP	GO:0050658	RNA transport	1/483	76/16967	0.999978	Glyma.15G051700	1
BP	GO:0051236	establishment of RNA localization	1/483	76/16967	0.999978	Glyma.15G051700	1
BP	GO:0000280	nuclear division	3/483	180/16967	0.999978	Glyma.17G211900/Glyma.02G157700/Glyma.10G039500	3
BP	GO:0006260	DNA replication	3/483	180/16967	0.999978	Glyma.10G148300/Glyma.06G155300/Glyma.10G227900	3
BP	GO:0070592	cell wall polysaccharide biosynthetic process	1/483	77/16967	0.999978	Glyma.11G251000	1
BP	GO:1901987	regulation of cell cycle phase transition	1/483	78/16967	0.999978	Glyma.10G227900	1
BP	GO:0000724	double-strand break repair via homologous recombination	1/483	79/16967	0.999978	Glyma.10G148300	1
BP	GO:0031123	RNA 3'-end processing	1/483	79/16967	0.999978	Glyma.19G005800	1
BP	GO:0035967	cellular response to topologically incorrect protein	1/483	79/16967	0.999978	Glyma.16G111800	1
BP	GO:0090305	nucleic acid phosphodiester bond hydrolysis	1/483	79/16967	0.999978	Glyma.17G000100	1
BP	GO:0022411	cellular component disassembly	2/483	135/16967	0.999978	Glyma.04G033500/Glyma.04G195200	2
BP	GO:0035966	response to topologically incorrect protein	1/483	80/16967	0.999978	Glyma.16G111800	1
BP	GO:0044038	cell wall macromolecule biosynthetic process	1/483	80/16967	0.999978	Glyma.11G251000	1
BP	GO:0070589	cellular component macromolecule biosynthetic process	1/483	80/16967	0.999978	Glyma.11G251000	1
BP	GO:0061025	membrane fusion	1/483	81/16967	0.999978	Glyma.10G082500	1
BP	GO:0006259	DNA metabolic process	10/483	498/16967	0.999978	Glyma.01G175300/Glyma.09G018700/Glyma.10G148300/Glyma.14G193200/Glyma.04G074500/Glyma.06G155300/Glyma.11G029500/Glyma.17G211900/Glyma.10G227900/Glyma.02G226300	10
BP	GO:0034728	nucleosome organization	1/483	82/16967	0.999978	Glyma.04G195200	1
BP	GO:0051254	positive regulation of RNA metabolic process	10/483	500/16967	0.999978	Glyma.05G157000/Glyma.04G214600/Glyma.17G192800/Glyma.17G096700/Glyma.06G143700/Glyma.03G081700/Glyma.04G195200/Glyma.11G041300/Glyma.05G070200/Glyma.06G151500	10
BP	GO:0051168	nuclear export	1/483	84/16967	0.999978	Glyma.15G051700	1
BP	GO:0009832	plant-type cell wall biogenesis	2/483	141/16967	0.999978	Glyma.11G251000/Glyma.18G272200	2
BP	GO:0046434	organophosphate catabolic process	1/483	85/16967	0.999978	Glyma.04G020400	1
BP	GO:0048285	organelle fission	4/483	241/16967	0.999978	Glyma.07G120900/Glyma.17G211900/Glyma.02G157700/Glyma.10G039500	4
BP	GO:0009658	chloroplast organization	2/483	142/16967	0.999978	Glyma.05G218400/Glyma.06G143700	2
BP	GO:0000070	mitotic sister chromatid segregation	1/483	86/16967	0.999978	Glyma.02G157700	1
BP	GO:0006839	mitochondrial transport	2/483	143/16967	0.999978	Glyma.02G059200/Glyma.01G178500	2
BP	GO:0000725	recombinational repair	1/483	87/16967	0.999978	Glyma.10G148300	1
BP	GO:0019751	polyol metabolic process	1/483	87/16967	0.999978	Glyma.14G072200	1
BP	GO:0016567	protein ubiquitination	9/483	468/16967	0.999978	Glyma.18G235600/Glyma.13G258700/Glyma.10G268900/Glyma.08G069800/Glyma.09G256800/Glyma.08G228100/Glyma.14G130700/Glyma.16G014700/Glyma.02G137300	9
BP	GO:0022406	membrane docking	1/483	88/16967	0.999978	Glyma.10G082500	1
BP	GO:0140056	organelle localization by membrane tethering	1/483	88/16967	0.999978	Glyma.10G082500	1
BP	GO:0050790	regulation of catalytic activity	5/483	293/16967	0.999978	Glyma.07G243600/Glyma.15G145600/Glyma.09G040500/Glyma.07G243500/Glyma.06G319300	5
BP	GO:0006403	RNA localization	1/483	89/16967	0.999978	Glyma.15G051700	1
BP	GO:0009908	flower development	1/483	89/16967	0.999978	Glyma.08G255200	1
BP	GO:0090567	reproductive shoot system development	1/483	89/16967	0.999978	Glyma.08G255200	1
BP	GO:1901657	glycosyl compound metabolic process	1/483	89/16967	0.999978	Glyma.07G083900	1
BP	GO:0065009	regulation of molecular function	5/483	298/16967	0.999978	Glyma.07G243600/Glyma.15G145600/Glyma.09G040500/Glyma.07G243500/Glyma.06G319300	5
BP	GO:0030243	cellulose metabolic process	1/483	92/16967	0.999978	Glyma.04G111300	1
BP	GO:0006644	phospholipid metabolic process	4/483	258/16967	0.999978	Glyma.20G170500/Glyma.04G020400/Glyma.07G107000/Glyma.08G241500	4
BP	GO:0000819	sister chromatid segregation	1/483	100/16967	0.999978	Glyma.02G157700	1
BP	GO:0015931	nucleobase-containing compound transport	1/483	102/16967	0.999978	Glyma.15G051700	1
BP	GO:0009657	plastid organization	2/483	163/16967	0.999978	Glyma.05G218400/Glyma.06G143700	2
BP	GO:0000902	cell morphogenesis	1/483	103/16967	0.999978	Glyma.18G295500	1
BP	GO:0045944	positive regulation of transcription by RNA polymerase II	4/483	269/16967	0.999978	Glyma.04G214600/Glyma.03G081700/Glyma.04G195200/Glyma.06G151500	4
BP	GO:0009165	nucleotide biosynthetic process	3/483	220/16967	0.999978	Glyma.17G150300/Glyma.05G042400/Glyma.05G045200	3
BP	GO:0032268	regulation of cellular protein metabolic process	6/483	367/16967	0.999978	Glyma.07G243600/Glyma.15G145600/Glyma.03G134700/Glyma.09G040500/Glyma.08G228100/Glyma.07G243500	6
BP	GO:0051273	beta-glucan metabolic process	1/483	106/16967	0.999978	Glyma.04G111300	1
BP	GO:1901293	nucleoside phosphate biosynthetic process	3/483	223/16967	0.999978	Glyma.17G150300/Glyma.05G042400/Glyma.05G045200	3
BP	GO:0048608	reproductive structure development	2/483	170/16967	0.999978	Glyma.08G272000/Glyma.08G255200	2
BP	GO:0061458	reproductive system development	2/483	171/16967	0.999978	Glyma.08G272000/Glyma.08G255200	2
BP	GO:0006338	chromatin remodeling	1/483	110/16967	0.999978	Glyma.04G195200	1
BP	GO:0000271	polysaccharide biosynthetic process	3/483	228/16967	0.999978	Glyma.08G309900/Glyma.11G251000/Glyma.06G030400	3
BP	GO:0006310	DNA recombination	2/483	173/16967	0.999978	Glyma.10G148300/Glyma.17G211900	2
BP	GO:0042545	cell wall modification	1/483	111/16967	0.999978	Glyma.15G184400	1
BP	GO:0018205	peptidyl-lysine modification	1/483	114/16967	0.999978	Glyma.10G292500	1
BP	GO:0098813	nuclear chromosome segregation	1/483	114/16967	0.999978	Glyma.02G157700	1
BP	GO:0140014	mitotic nuclear division	1/483	114/16967	0.999978	Glyma.02G157700	1
BP	GO:0006302	double-strand break repair	1/483	116/16967	0.999978	Glyma.10G148300	1
BP	GO:0006402	mRNA catabolic process	1/483	116/16967	0.999978	Glyma.19G005800	1
BP	GO:0051246	regulation of protein metabolic process	6/483	387/16967	0.999978	Glyma.07G243600/Glyma.15G145600/Glyma.03G134700/Glyma.09G040500/Glyma.08G228100/Glyma.07G243500	6
BP	GO:0010564	regulation of cell cycle process	1/483	117/16967	0.999978	Glyma.10G227900	1
BP	GO:0003006	developmental process involved in reproduction	2/483	186/16967	0.999978	Glyma.08G272000/Glyma.08G255200	2
BP	GO:1901698	response to nitrogen compound	1/483	122/16967	0.999978	Glyma.18G141900	1
BP	GO:0007059	chromosome segregation	1/483	125/16967	0.999978	Glyma.02G157700	1
BP	GO:0033692	cellular polysaccharide biosynthetic process	2/483	190/16967	0.999978	Glyma.11G251000/Glyma.06G030400	2
BP	GO:0016570	histone modification	1/483	126/16967	0.999978	Glyma.17G010600	1
BP	GO:0044770	cell cycle phase transition	1/483	128/16967	0.999978	Glyma.10G227900	1
BP	GO:0018105	peptidyl-serine phosphorylation	1/483	131/16967	0.999978	Glyma.10G217000	1
BP	GO:0018209	peptidyl-serine modification	1/483	132/16967	0.999978	Glyma.10G217000	1
BP	GO:0006888	endoplasmic reticulum to Golgi vesicle-mediated transport	1/483	133/16967	0.999978	Glyma.20G158000	1
BP	GO:0009966	regulation of signal transduction	1/483	133/16967	0.999978	Glyma.05G196900	1
BP	GO:0010646	regulation of cell communication	1/483	133/16967	0.999978	Glyma.05G196900	1
BP	GO:0023051	regulation of signaling	1/483	133/16967	0.999978	Glyma.05G196900	1
BP	GO:0006897	endocytosis	1/483	134/16967	0.999978	Glyma.04G033500	1
BP	GO:0009152	purine ribonucleotide biosynthetic process	1/483	134/16967	0.999978	Glyma.05G045200	1
BP	GO:0008033	tRNA processing	1/483	135/16967	0.999978	Glyma.17G000100	1
BP	GO:0009250	glucan biosynthetic process	1/483	135/16967	0.999978	Glyma.06G030400	1
BP	GO:0042273	ribosomal large subunit biogenesis	1/483	136/16967	0.999978	Glyma.12G009600	1
BP	GO:0016050	vesicle organization	1/483	138/16967	0.999978	Glyma.10G082500	1
BP	GO:0006913	nucleocytoplasmic transport	1/483	141/16967	0.999978	Glyma.15G051700	1
BP	GO:0045017	glycerolipid biosynthetic process	1/483	141/16967	0.999978	Glyma.09G239600	1
BP	GO:0051169	nuclear transport	1/483	141/16967	0.999978	Glyma.15G051700	1
BP	GO:0006164	purine nucleotide biosynthetic process	1/483	142/16967	0.999978	Glyma.05G045200	1
BP	GO:0007005	mitochondrion organization	2/483	210/16967	0.999978	Glyma.07G120900/Glyma.11G235000	2
BP	GO:0048583	regulation of response to stimulus	2/483	210/16967	0.999978	Glyma.03G081700/Glyma.05G196900	2
BP	GO:0022402	cell cycle process	6/483	433/16967	0.999978	Glyma.05G085400/Glyma.14G085200/Glyma.17G211900/Glyma.10G227900/Glyma.02G157700/Glyma.10G039500	6
BP	GO:0006401	RNA catabolic process	1/483	146/16967	0.999978	Glyma.19G005800	1
BP	GO:1903047	mitotic cell cycle process	3/483	275/16967	0.999978	Glyma.05G085400/Glyma.14G085200/Glyma.02G157700	3
BP	GO:0048731	system development	4/483	336/16967	0.999978	Glyma.08G272000/Glyma.08G329900/Glyma.08G255200/Glyma.14G215400	4
BP	GO:0009653	anatomical structure morphogenesis	2/483	220/16967	0.999978	Glyma.06G294500/Glyma.18G295500	2
BP	GO:0071824	protein-DNA complex subunit organization	1/483	151/16967	0.999978	Glyma.04G195200	1
BP	GO:0072522	purine-containing compound biosynthetic process	1/483	153/16967	0.999978	Glyma.05G045200	1
BP	GO:0061024	membrane organization	3/483	288/16967	0.999978	Glyma.04G129200/Glyma.10G082500/Glyma.04G144900	3
BP	GO:0048193	Golgi vesicle transport	2/483	242/16967	0.999978	Glyma.15G008700/Glyma.20G158000	2
BP	GO:0009260	ribonucleotide biosynthetic process	1/483	173/16967	0.999978	Glyma.05G045200	1
BP	GO:0140694	non-membrane-bounded organelle assembly	1/483	174/16967	0.999978	Glyma.01G153100	1
BP	GO:0018193	peptidyl-amino acid modification	4/483	368/16967	0.999978	Glyma.10G217000/Glyma.05G149900/Glyma.03G086200/Glyma.10G292500	4
BP	GO:0051276	chromosome organization	4/483	371/16967	0.999978	Glyma.10G148300/Glyma.04G195200/Glyma.15G051700/Glyma.02G157700	4
BP	GO:0033043	regulation of organelle organization	1/483	180/16967	0.999978	Glyma.09G153900	1
BP	GO:0046390	ribose phosphate biosynthetic process	1/483	181/16967	0.999978	Glyma.05G045200	1
BP	GO:0006325	chromatin organization	1/483	183/16967	0.999978	Glyma.04G195200	1
BP	GO:0090407	organophosphate biosynthetic process	5/483	438/16967	0.999978	Glyma.17G150300/Glyma.05G042400/Glyma.14G072200/Glyma.08G277000/Glyma.05G045200	5
BP	GO:0000278	mitotic cell cycle	3/483	337/16967	0.999978	Glyma.05G085400/Glyma.14G085200/Glyma.02G157700	3
BP	GO:0034655	nucleobase-containing compound catabolic process	1/483	202/16967	0.999978	Glyma.19G005800	1
BP	GO:0006486	protein glycosylation	1/483	203/16967	0.999978	Glyma.13G084600	1
BP	GO:0043413	macromolecule glycosylation	1/483	203/16967	0.999978	Glyma.13G084600	1
BP	GO:0009101	glycoprotein biosynthetic process	1/483	204/16967	0.999978	Glyma.13G084600	1
BP	GO:0051726	regulation of cell cycle	1/483	209/16967	0.999978	Glyma.10G227900	1
BP	GO:0070085	glycosylation	1/483	209/16967	0.999978	Glyma.13G084600	1
BP	GO:0070925	organelle assembly	1/483	217/16967	0.999978	Glyma.01G153100	1
BP	GO:0006399	tRNA metabolic process	1/483	219/16967	0.999978	Glyma.17G000100	1
BP	GO:0009100	glycoprotein metabolic process	1/483	225/16967	0.999978	Glyma.13G084600	1
BP	GO:0051128	regulation of cellular component organization	1/483	225/16967	0.999978	Glyma.09G153900	1
BP	GO:0006364	rRNA processing	2/483	307/16967	0.999978	Glyma.12G009600/Glyma.14G024300	2
BP	GO:0043161	proteasome-mediated ubiquitin-dependent protein catabolic process	2/483	310/16967	0.999978	Glyma.03G134700/Glyma.08G228100	2
BP	GO:0046700	heterocycle catabolic process	1/483	233/16967	0.999978	Glyma.19G005800	1
BP	GO:0044270	cellular nitrogen compound catabolic process	1/483	235/16967	0.999978	Glyma.19G005800	1
BP	GO:0016072	rRNA metabolic process	2/483	316/16967	0.999978	Glyma.12G009600/Glyma.14G024300	2
BP	GO:0051301	cell division	1/483	239/16967	0.999978	Glyma.02G157700	1
BP	GO:0010498	proteasomal protein catabolic process	2/483	336/16967	0.999978	Glyma.03G134700/Glyma.08G228100	2
BP	GO:0034470	ncRNA processing	3/483	457/16967	0.999978	Glyma.12G009600/Glyma.17G000100/Glyma.14G024300	3
BP	GO:0000398	mRNA splicing, via spliceosome	1/483	300/16967	0.999978	Glyma.13G182600	1
BP	GO:0000375	RNA splicing, via transesterification reactions	1/483	319/16967	0.999978	Glyma.13G182600	1
BP	GO:0000377	RNA splicing, via transesterification reactions with bulged adenosine as nucleophile	1/483	319/16967	0.999978	Glyma.13G182600	1
BP	GO:0006397	mRNA processing	2/483	429/16967	0.999978	Glyma.16G111800/Glyma.13G182600	2
BP	GO:0042254	ribosome biogenesis	2/483	437/16967	0.999978	Glyma.12G009600/Glyma.14G024300	2
BP	GO:0008380	RNA splicing	1/483	368/16967	0.999978	Glyma.13G182600	1
CC	GO:0048046	apoplast	22/600	233/21541	0.000111734	Glyma.11G253900/Glyma.06G052100/Glyma.14G062300/Glyma.02G051700/Glyma.11G137500/Glyma.11G073100/Glyma.14G198900/Glyma.04G028600/Glyma.01G127400/Glyma.02G068900/Glyma.01G196800/Glyma.09G198900/Glyma.19G151100/Glyma.13G327000/Glyma.02G231600/Glyma.07G010400/Glyma.03G147700/Glyma.09G062600/Glyma.20G141800/Glyma.15G023800/Glyma.09G062900/Glyma.06G157200	22
CC	GO:0005618	cell wall	31/600	493/21541	0.00199845	Glyma.11G253900/Glyma.15G110500/Glyma.13G336600/Glyma.02G051700/Glyma.11G244900/Glyma.07G229000/Glyma.18G260900/Glyma.11G073100/Glyma.04G021600/Glyma.18G175300/Glyma.20G169200/Glyma.04G028600/Glyma.10G090100/Glyma.02G068900/Glyma.01G196800/Glyma.07G263000/Glyma.02G248500/Glyma.13G327000/Glyma.19G006200/Glyma.07G010400/Glyma.09G062600/Glyma.13G054600/Glyma.15G184400/Glyma.20G141800/Glyma.07G132600…	31
CC	GO:0005773	vacuole	29/600	464/21541	0.00270295	Glyma.10G096300/Glyma.02G046800/Glyma.13G183700/Glyma.10G102100/Glyma.02G051700/Glyma.18G141900/Glyma.11G073100/Glyma.16G145300/Glyma.04G028600/Glyma.17G138500/Glyma.10G019000/Glyma.12G094400/Glyma.19G221000/Glyma.13G327000/Glyma.07G010400/Glyma.14G015300/Glyma.10G109500/Glyma.13G029200/Glyma.03G120200/Glyma.20G178600/Glyma.09G226700/Glyma.02G097700/Glyma.14G032400/Glyma.07G121900/Glyma.15G023800…	29
CC	GO:0031225	anchored component of membrane	15/600	220/21541	0.0558261	Glyma.17G137300/Glyma.08G329900/Glyma.05G056100/Glyma.11G251100/Glyma.06G239900/Glyma.09G266700/Glyma.16G188800/Glyma.12G187600/Glyma.13G313700/Glyma.03G109900/Glyma.17G112900/Glyma.12G185200/Glyma.11G095000/Glyma.17G138300/Glyma.09G037100	15
CC	GO:0046658	anchored component of plasma membrane	12/600	174/21541	0.118949	Glyma.08G329900/Glyma.05G056100/Glyma.06G239900/Glyma.09G266700/Glyma.12G187600/Glyma.13G313700/Glyma.03G109900/Glyma.17G112900/Glyma.12G185200/Glyma.11G095000/Glyma.17G138300/Glyma.09G037100	12
CC	GO:0000325	plant-type vacuole	8/600	113/21541	0.354371	Glyma.18G141900/Glyma.10G019000/Glyma.12G094400/Glyma.19G221000/Glyma.14G015300/Glyma.02G097700/Glyma.07G121900/Glyma.03G167800	8
CC	GO:0030286	dynein complex	3/600	19/21541	0.354371	Glyma.12G223500/Glyma.06G270500/Glyma.13G277800	3
CC	GO:0005774	vacuolar membrane	13/600	243/21541	0.39754	Glyma.10G096300/Glyma.02G046800/Glyma.18G141900/Glyma.10G019000/Glyma.12G094400/Glyma.19G221000/Glyma.14G015300/Glyma.10G109500/Glyma.03G120200/Glyma.02G097700/Glyma.14G032400/Glyma.07G121900/Glyma.03G167800	13
CC	GO:0031226	intrinsic component of plasma membrane	14/600	284/21541	0.442771	Glyma.08G329900/Glyma.05G056100/Glyma.02G145100/Glyma.06G239900/Glyma.09G266700/Glyma.12G187600/Glyma.19G221000/Glyma.13G313700/Glyma.03G109900/Glyma.17G112900/Glyma.12G185200/Glyma.11G095000/Glyma.17G138300/Glyma.09G037100	14
CC	GO:0048471	perinuclear region of cytoplasm	2/600	10/21541	0.442771	Glyma.16G178800/Glyma.02G305600	2
CC	GO:0016459	myosin complex	3/600	26/21541	0.442771	Glyma.08G161500/Glyma.10G286300/Glyma.15G266300	3
CC	GO:0031305	integral component of mitochondrial inner membrane	4/600	48/21541	0.442771	Glyma.02G059200/Glyma.01G178500/Glyma.11G235000/Glyma.16G015600	4
CC	GO:0031304	intrinsic component of mitochondrial inner membrane	4/600	49/21541	0.442771	Glyma.02G059200/Glyma.01G178500/Glyma.11G235000/Glyma.16G015600	4
CC	GO:0034702	ion channel complex	2/600	13/21541	0.442771	Glyma.02G059200/Glyma.01G178500	2
CC	GO:0034703	cation channel complex	2/600	13/21541	0.442771	Glyma.02G059200/Glyma.01G178500	2
CC	GO:0034704	calcium channel complex	2/600	13/21541	0.442771	Glyma.02G059200/Glyma.01G178500	2
CC	GO:1990246	uniplex complex	2/600	13/21541	0.442771	Glyma.02G059200/Glyma.01G178500	2
CC	GO:0015629	actin cytoskeleton	6/600	95/21541	0.442771	Glyma.08G161500/Glyma.05G218400/Glyma.17G092600/Glyma.10G286300/Glyma.14G005200/Glyma.15G266300	6
CC	GO:0005875	microtubule associated complex	6/600	96/21541	0.442771	Glyma.12G223500/Glyma.06G270500/Glyma.15G256400/Glyma.03G237800/Glyma.13G277800/Glyma.05G149700	6
CC	GO:0016593	Cdc73/Paf1 complex	2/600	14/21541	0.442771	Glyma.01G234600/Glyma.11G008300	2
CC	GO:0005834	heterotrimeric G-protein complex	2/600	15/21541	0.442771	Glyma.17G226700/Glyma.14G098000	2
CC	GO:0019897	extrinsic component of plasma membrane	2/600	15/21541	0.442771	Glyma.17G226700/Glyma.14G098000	2
CC	GO:0031234	extrinsic component of cytoplasmic side of plasma membrane	2/600	15/21541	0.442771	Glyma.17G226700/Glyma.14G098000	2
CC	GO:1905360	GTPase complex	2/600	15/21541	0.442771	Glyma.17G226700/Glyma.14G098000	2
CC	GO:0080008	Cul4-RING E3 ubiquitin ligase complex	3/600	34/21541	0.45192	Glyma.14G193200/Glyma.03G134700/Glyma.02G226300	3
CC	GO:0032592	integral component of mitochondrial membrane	4/600	58/21541	0.497712	Glyma.02G059200/Glyma.01G178500/Glyma.11G235000/Glyma.16G015600	4
CC	GO:0098573	intrinsic component of mitochondrial membrane	4/600	59/21541	0.50339	Glyma.02G059200/Glyma.01G178500/Glyma.11G235000/Glyma.16G015600	4
CC	GO:0009705	plant-type vacuole membrane	4/600	64/21541	0.609982	Glyma.18G141900/Glyma.12G094400/Glyma.19G221000/Glyma.02G097700	4
CC	GO:0009898	cytoplasmic side of plasma membrane	2/600	21/21541	0.635966	Glyma.17G226700/Glyma.14G098000	2
CC	GO:0031012	extracellular matrix	2/600	21/21541	0.635966	Glyma.02G215700/Glyma.02G028200	2
CC	GO:0005871	kinesin complex	3/600	49/21541	0.833854	Glyma.15G256400/Glyma.03G237800/Glyma.05G149700	3
CC	GO:0043596	nuclear replication fork	2/600	27/21541	0.854735	Glyma.06G155300/Glyma.10G227900	2
CC	GO:0005911	cell-cell junction	9/600	228/21541	0.854735	Glyma.06G294500/Glyma.03G213000/Glyma.20G169200/Glyma.20G051700/Glyma.11G055200/Glyma.07G263000/Glyma.12G187600/Glyma.13G313700/Glyma.08G290600	9
CC	GO:0009506	plasmodesma	9/600	228/21541	0.854735	Glyma.06G294500/Glyma.03G213000/Glyma.20G169200/Glyma.20G051700/Glyma.11G055200/Glyma.07G263000/Glyma.12G187600/Glyma.13G313700/Glyma.08G290600	9
CC	GO:0055044	symplast	9/600	228/21541	0.854735	Glyma.06G294500/Glyma.03G213000/Glyma.20G169200/Glyma.20G051700/Glyma.11G055200/Glyma.07G263000/Glyma.12G187600/Glyma.13G313700/Glyma.08G290600	9
CC	GO:0070161	anchoring junction	9/600	228/21541	0.854735	Glyma.06G294500/Glyma.03G213000/Glyma.20G169200/Glyma.20G051700/Glyma.11G055200/Glyma.07G263000/Glyma.12G187600/Glyma.13G313700/Glyma.08G290600	9
CC	GO:0030054	cell junction	9/600	229/21541	0.854735	Glyma.06G294500/Glyma.03G213000/Glyma.20G169200/Glyma.20G051700/Glyma.11G055200/Glyma.07G263000/Glyma.12G187600/Glyma.13G313700/Glyma.08G290600	9
CC	GO:0000015	phosphopyruvate hydratase complex	1/600	10/21541	0.999968	Glyma.09G153900	1
CC	GO:0098552	side of membrane	2/600	36/21541	0.999968	Glyma.17G226700/Glyma.14G098000	2
CC	GO:0098562	cytoplasmic side of membrane	2/600	36/21541	0.999968	Glyma.17G226700/Glyma.14G098000	2
CC	GO:0005856	cytoskeleton	15/600	447/21541	0.999968	Glyma.11G139800/Glyma.12G223500/Glyma.06G270500/Glyma.08G161500/Glyma.05G218400/Glyma.15G256400/Glyma.17G092600/Glyma.03G237800/Glyma.01G168200/Glyma.09G111200/Glyma.10G286300/Glyma.13G277800/Glyma.05G149700/Glyma.14G005200/Glyma.15G266300	15
CC	GO:1902555	endoribonuclease complex	1/600	12/21541	0.999968	Glyma.17G000100	1
CC	GO:0005758	mitochondrial intermembrane space	1/600	13/21541	0.999968	Glyma.01G230900	1
CC	GO:0016514	SWI/SNF complex	1/600	13/21541	0.999968	Glyma.04G195200	1
CC	GO:0031970	organelle envelope lumen	1/600	13/21541	0.999968	Glyma.01G230900	1
CC	GO:0045240	dihydrolipoyl dehydrogenase complex	1/600	13/21541	0.999968	Glyma.06G120300	1
CC	GO:0008023	transcription elongation factor complex	2/600	43/21541	0.999968	Glyma.01G234600/Glyma.11G008300	2
CC	GO:0099081	supramolecular polymer	9/600	274/21541	0.999968	Glyma.12G223500/Glyma.06G270500/Glyma.05G218400/Glyma.15G256400/Glyma.03G237800/Glyma.01G168200/Glyma.13G277800/Glyma.05G149700/Glyma.14G005200	9
CC	GO:0099512	supramolecular fiber	9/600	274/21541	0.999968	Glyma.12G223500/Glyma.06G270500/Glyma.05G218400/Glyma.15G256400/Glyma.03G237800/Glyma.01G168200/Glyma.13G277800/Glyma.05G149700/Glyma.14G005200	9
CC	GO:0099513	polymeric cytoskeletal fiber	9/600	274/21541	0.999968	Glyma.12G223500/Glyma.06G270500/Glyma.05G218400/Glyma.15G256400/Glyma.03G237800/Glyma.01G168200/Glyma.13G277800/Glyma.05G149700/Glyma.14G005200	9
CC	GO:0005615	extracellular space	4/600	114/21541	0.999968	Glyma.08G109000/Glyma.13G094200/Glyma.05G152200/Glyma.15G062400	4
CC	GO:0005765	lysosomal membrane	1/600	18/21541	0.999968	Glyma.10G096300	1
CC	GO:0045239	tricarboxylic acid cycle enzyme complex	1/600	18/21541	0.999968	Glyma.06G120300	1
CC	GO:0098852	lytic vacuole membrane	1/600	18/21541	0.999968	Glyma.10G096300	1
CC	GO:0030894	replisome	1/600	19/21541	0.999968	Glyma.06G155300	1
CC	GO:0043601	nuclear replisome	1/600	19/21541	0.999968	Glyma.06G155300	1
CC	GO:0005657	replication fork	2/600	51/21541	0.999968	Glyma.06G155300/Glyma.10G227900	2
CC	GO:0098791	Golgi apparatus subcompartment	6/600	187/21541	0.999968	Glyma.09G213100/Glyma.11G232400/Glyma.04G067700/Glyma.01G046700/Glyma.08G001200/Glyma.03G213300	6
CC	GO:0009522	photosystem I	2/600	55/21541	0.999968	Glyma.06G150300/Glyma.04G215800	2
CC	GO:0098797	plasma membrane protein complex	2/600	56/21541	0.999968	Glyma.17G226700/Glyma.14G098000	2
CC	GO:0005777	peroxisome	4/600	126/21541	0.999968	Glyma.08G059300/Glyma.17G049900/Glyma.18G045100/Glyma.13G246600	4
CC	GO:0042579	microbody	4/600	126/21541	0.999968	Glyma.08G059300/Glyma.17G049900/Glyma.18G045100/Glyma.13G246600	4
CC	GO:0005795	Golgi stack	1/600	23/21541	0.999968	Glyma.03G213300	1
CC	GO:0005802	trans-Golgi network	5/600	164/21541	0.999968	Glyma.09G213100/Glyma.11G232400/Glyma.04G067700/Glyma.01G046700/Glyma.08G001200	5
CC	GO:0070469	respirasome	3/600	94/21541	0.999968	Glyma.04G123800/Glyma.01G230900/Glyma.11G235000	3
CC	GO:0005788	endoplasmic reticulum lumen	1/600	24/21541	0.999968	Glyma.11G146800	1
CC	GO:0042575	DNA polymerase complex	1/600	24/21541	0.999968	Glyma.06G155300	1
CC	GO:0005643	nuclear pore	2/600	60/21541	0.999968	Glyma.03G140900/Glyma.15G051700	2
CC	GO:0031969	chloroplast membrane	4/600	135/21541	0.999968	Glyma.11G093500/Glyma.02G203300/Glyma.13G206700/Glyma.19G005900	4
CC	GO:0009941	chloroplast envelope	6/600	211/21541	0.999968	Glyma.11G093500/Glyma.02G203300/Glyma.06G052100/Glyma.12G234600/Glyma.13G206700/Glyma.19G005900	6
CC	GO:0030126	COPI vesicle coat	1/600	28/21541	0.999968	Glyma.15G008700	1
CC	GO:1990204	oxidoreductase complex	4/600	140/21541	0.999968	Glyma.06G052100/Glyma.06G120300/Glyma.13G127200/Glyma.19G009000	4
CC	GO:1902495	transmembrane transporter complex	2/600	67/21541	0.999968	Glyma.02G059200/Glyma.01G178500	2
CC	GO:0099080	supramolecular complex	10/600	366/21541	0.999968	Glyma.01G153100/Glyma.12G223500/Glyma.06G270500/Glyma.05G218400/Glyma.15G256400/Glyma.03G237800/Glyma.01G168200/Glyma.13G277800/Glyma.05G149700/Glyma.14G005200	10
CC	GO:0000779	condensed chromosome, centromeric region	1/600	30/21541	0.999968	Glyma.02G157700	1
CC	GO:0005689	U12-type spliceosomal complex	1/600	30/21541	0.999968	Glyma.13G182600	1
CC	GO:0005732	sno(s)RNA-containing ribonucleoprotein complex	1/600	30/21541	0.999968	Glyma.17G000100	1
CC	GO:0030137	COPI-coated vesicle	1/600	30/21541	0.999968	Glyma.15G008700	1
CC	GO:0030663	COPI-coated vesicle membrane	1/600	30/21541	0.999968	Glyma.15G008700	1
CC	GO:0005680	anaphase-promoting complex	1/600	31/21541	0.999968	Glyma.08G228100	1
CC	GO:0000152	nuclear ubiquitin ligase complex	1/600	33/21541	0.999968	Glyma.08G228100	1
CC	GO:0009505	plant-type cell wall	3/600	112/21541	0.999968	Glyma.20G169200/Glyma.07G263000/Glyma.16G107300	3
CC	GO:0005874	microtubule	7/600	266/21541	0.999968	Glyma.12G223500/Glyma.06G270500/Glyma.15G256400/Glyma.03G237800/Glyma.01G168200/Glyma.13G277800/Glyma.05G149700	7
CC	GO:1990351	transporter complex	2/600	75/21541	0.999968	Glyma.02G059200/Glyma.01G178500	2
CC	GO:0000118	histone deacetylase complex	1/600	35/21541	0.999968	Glyma.17G010600	1
CC	GO:0009521	photosystem	3/600	119/21541	0.999968	Glyma.06G150300/Glyma.13G127200/Glyma.04G215800	3
CC	GO:0000775	chromosome, centromeric region	1/600	37/21541	0.999968	Glyma.02G157700	1
CC	GO:0005686	U2 snRNP	1/600	37/21541	0.999968	Glyma.13G182600	1
CC	GO:0009654	photosystem II oxygen evolving complex	1/600	38/21541	0.999968	Glyma.13G127200	1
CC	GO:0019898	extrinsic component of membrane	2/600	83/21541	0.999968	Glyma.17G226700/Glyma.14G098000	2
CC	GO:0009570	chloroplast stroma	4/600	165/21541	0.999968	Glyma.03G068100/Glyma.12G181800/Glyma.02G305600/Glyma.10G261400	4
CC	GO:0031461	cullin-RING ubiquitin ligase complex	4/600	168/21541	0.999968	Glyma.14G193200/Glyma.03G134700/Glyma.08G228100/Glyma.02G226300	4
CC	GO:0009532	plastid stroma	4/600	169/21541	0.999968	Glyma.03G068100/Glyma.12G181800/Glyma.02G305600/Glyma.10G261400	4
CC	GO:0070603	SWI/SNF superfamily-type complex	1/600	44/21541	0.999968	Glyma.04G195200	1
CC	GO:0005635	nuclear envelope	2/600	89/21541	0.999968	Glyma.03G140900/Glyma.15G051700	2
CC	GO:0071011	precatalytic spliceosome	1/600	45/21541	0.999968	Glyma.13G182600	1
CC	GO:1904949	ATPase complex	1/600	46/21541	0.999968	Glyma.04G195200	1
CC	GO:0005743	mitochondrial inner membrane	7/600	304/21541	0.999968	Glyma.08G059300/Glyma.04G123800/Glyma.02G059200/Glyma.01G178500/Glyma.11G235000/Glyma.13G246600/Glyma.16G015600	7
CC	GO:0098687	chromosomal region	1/600	49/21541	0.999968	Glyma.02G157700	1
CC	GO:0015630	microtubule cytoskeleton	7/600	311/21541	0.999968	Glyma.12G223500/Glyma.06G270500/Glyma.15G256400/Glyma.03G237800/Glyma.01G168200/Glyma.13G277800/Glyma.05G149700	7
CC	GO:0000228	nuclear chromosome	2/600	101/21541	0.999968	Glyma.06G155300/Glyma.10G227900	2
CC	GO:0000932	P-body	1/600	55/21541	0.999968	Glyma.01G153100	1
CC	GO:0000793	condensed chromosome	1/600	58/21541	0.999968	Glyma.02G157700	1
CC	GO:0005887	integral component of plasma membrane	2/600	110/21541	0.999968	Glyma.02G145100/Glyma.19G221000	2
CC	GO:0005798	Golgi-associated vesicle	1/600	61/21541	0.999968	Glyma.15G008700	1
CC	GO:0030660	Golgi-associated vesicle membrane	1/600	61/21541	0.999968	Glyma.15G008700	1
CC	GO:0016591	RNA polymerase II, holoenzyme	2/600	112/21541	0.999968	Glyma.01G234600/Glyma.11G008300	2
CC	GO:0031201	SNARE complex	1/600	64/21541	0.999968	Glyma.10G082500	1
CC	GO:0005746	mitochondrial respirasome	1/600	66/21541	0.999968	Glyma.11G235000	1
CC	GO:0035770	ribonucleoprotein granule	1/600	67/21541	0.999968	Glyma.01G153100	1
CC	GO:0036464	cytoplasmic ribonucleoprotein granule	1/600	67/21541	0.999968	Glyma.01G153100	1
CC	GO:0005684	U2-type spliceosomal complex	1/600	68/21541	0.999968	Glyma.13G182600	1
CC	GO:0005740	mitochondrial envelope	8/600	391/21541	0.999968	Glyma.08G059300/Glyma.04G123800/Glyma.02G059200/Glyma.01G178500/Glyma.01G230900/Glyma.11G235000/Glyma.13G246600/Glyma.16G015600	8
CC	GO:0071013	catalytic step 2 spliceosome	1/600	70/21541	0.999968	Glyma.13G182600	1
CC	GO:0019866	organelle inner membrane	7/600	354/21541	0.999968	Glyma.08G059300/Glyma.04G123800/Glyma.02G059200/Glyma.01G178500/Glyma.11G235000/Glyma.13G246600/Glyma.16G015600	7
CC	GO:0031301	integral component of organelle membrane	4/600	221/21541	0.999968	Glyma.02G059200/Glyma.01G178500/Glyma.11G235000/Glyma.16G015600	4
CC	GO:0000151	ubiquitin ligase complex	4/600	222/21541	0.999968	Glyma.14G193200/Glyma.03G134700/Glyma.08G228100/Glyma.02G226300	4
CC	GO:0031300	intrinsic component of organelle membrane	4/600	226/21541	0.999968	Glyma.02G059200/Glyma.01G178500/Glyma.11G235000/Glyma.16G015600	4
CC	GO:0005764	lysosome	1/600	76/21541	0.999968	Glyma.10G096300	1
CC	GO:0000323	lytic vacuole	1/600	79/21541	0.999968	Glyma.10G096300	1
CC	GO:0009526	plastid envelope	8/600	420/21541	0.999968	Glyma.11G093500/Glyma.02G203300/Glyma.06G052100/Glyma.12G234600/Glyma.06G150300/Glyma.13G206700/Glyma.19G005900/Glyma.13G127200	8
CC	GO:0098800	inner mitochondrial membrane protein complex	2/600	140/21541	0.999968	Glyma.02G059200/Glyma.01G178500	2
CC	GO:0030120	vesicle coat	1/600	84/21541	0.999968	Glyma.15G008700	1
CC	GO:0031966	mitochondrial membrane	7/600	380/21541	0.999968	Glyma.08G059300/Glyma.04G123800/Glyma.02G059200/Glyma.01G178500/Glyma.11G235000/Glyma.13G246600/Glyma.16G015600	7
CC	GO:0055029	nuclear DNA-directed RNA polymerase complex	2/600	149/21541	0.999968	Glyma.01G234600/Glyma.11G008300	2
CC	GO:0097525	spliceosomal snRNP complex	1/600	91/21541	0.999968	Glyma.13G182600	1
CC	GO:0009523	photosystem II	1/600	93/21541	0.999968	Glyma.13G127200	1
CC	GO:0030532	small nuclear ribonucleoprotein complex	1/600	93/21541	0.999968	Glyma.13G182600	1
CC	GO:0000428	DNA-directed RNA polymerase complex	2/600	157/21541	0.999968	Glyma.01G234600/Glyma.11G008300	2
CC	GO:0042170	plastid membrane	6/600	359/21541	0.999968	Glyma.11G093500/Glyma.02G203300/Glyma.06G150300/Glyma.13G206700/Glyma.19G005900/Glyma.13G127200	6
CC	GO:0005768	endosome	5/600	315/21541	0.999968	Glyma.09G213100/Glyma.11G232400/Glyma.04G067700/Glyma.01G046700/Glyma.08G001200	5
CC	GO:0034357	photosynthetic membrane	4/600	269/21541	0.999968	Glyma.06G150300/Glyma.13G127200/Glyma.04G215800/Glyma.03G059200	4
CC	GO:0030662	coated vesicle membrane	1/600	102/21541	0.999968	Glyma.15G008700	1
CC	GO:0120114	Sm-like protein family complex	1/600	104/21541	0.999968	Glyma.13G182600	1
CC	GO:0030880	RNA polymerase complex	2/600	166/21541	0.999968	Glyma.01G234600/Glyma.11G008300	2
CC	GO:0098798	mitochondrial protein-containing complex	3/600	226/21541	0.999968	Glyma.02G059200/Glyma.01G178500/Glyma.06G120300	3
CC	GO:0009579	thylakoid	5/600	341/21541	0.999968	Glyma.03G068100/Glyma.06G150300/Glyma.13G127200/Glyma.04G215800/Glyma.03G059200	5
CC	GO:0005694	chromosome	6/600	395/21541	0.999968	Glyma.10G148300/Glyma.06G155300/Glyma.04G195200/Glyma.10G227900/Glyma.17G010600/Glyma.02G157700	6
CC	GO:0030117	membrane coat	1/600	119/21541	0.999968	Glyma.15G008700	1
CC	GO:0048475	coated membrane	1/600	119/21541	0.999968	Glyma.15G008700	1
CC	GO:0000785	chromatin	2/600	199/21541	0.999968	Glyma.04G195200/Glyma.17G010600	2
CC	GO:0140534	endoplasmic reticulum protein-containing complex	1/600	132/21541	0.999968	Glyma.16G111800	1
CC	GO:0042651	thylakoid membrane	3/600	259/21541	0.999968	Glyma.06G150300/Glyma.13G127200/Glyma.03G059200	3
CC	GO:0032993	protein-DNA complex	1/600	136/21541	0.999968	Glyma.06G155300	1
CC	GO:0090575	RNA polymerase II transcription regulator complex	1/600	142/21541	0.999968	Glyma.17G090500	1
CC	GO:0005759	mitochondrial matrix	1/600	145/21541	0.999968	Glyma.06G120300	1
CC	GO:0009535	chloroplast thylakoid membrane	2/600	218/21541	0.999968	Glyma.06G150300/Glyma.13G127200	2
CC	GO:0055035	plastid thylakoid membrane	2/600	218/21541	0.999968	Glyma.06G150300/Glyma.13G127200	2
CC	GO:0000139	Golgi membrane	4/600	347/21541	0.999968	Glyma.15G008700/Glyma.08G309900/Glyma.11G251000/Glyma.13G084600	4
CC	GO:0030135	coated vesicle	1/600	164/21541	0.999968	Glyma.15G008700	1
CC	GO:0005654	nucleoplasm	4/600	365/21541	0.999968	Glyma.15G046600/Glyma.01G234600/Glyma.11G008300/Glyma.17G010600	4
CC	GO:0022625	cytosolic large ribosomal subunit	1/600	176/21541	0.999968	Glyma.12G009600	1
CC	GO:0061695	transferase complex, transferring phosphorus-containing groups	3/600	321/21541	0.999968	Glyma.01G234600/Glyma.06G155300/Glyma.11G008300	3
CC	GO:0009534	chloroplast thylakoid	2/600	272/21541	0.999968	Glyma.06G150300/Glyma.13G127200	2
CC	GO:0031976	plastid thylakoid	2/600	272/21541	0.999968	Glyma.06G150300/Glyma.13G127200	2
CC	GO:0005667	transcription regulator complex	1/600	196/21541	0.999968	Glyma.17G090500	1
CC	GO:0005789	endoplasmic reticulum membrane	5/600	459/21541	0.999968	Glyma.13G173500/Glyma.17G069100/Glyma.16G111800/Glyma.07G225600/Glyma.03G076200	5
CC	GO:0042175	nuclear outer membrane-endoplasmic reticulum membrane network	5/600	459/21541	0.999968	Glyma.13G173500/Glyma.17G069100/Glyma.16G111800/Glyma.07G225600/Glyma.03G076200	5
CC	GO:0098827	endoplasmic reticulum subcompartment	5/600	463/21541	0.999968	Glyma.13G173500/Glyma.17G069100/Glyma.16G111800/Glyma.07G225600/Glyma.03G076200	5
CC	GO:0005681	spliceosomal complex	1/600	213/21541	0.999968	Glyma.13G182600	1
CC	GO:0030659	cytoplasmic vesicle membrane	1/600	216/21541	0.999968	Glyma.15G008700	1
CC	GO:0012506	vesicle membrane	1/600	217/21541	0.999968	Glyma.15G008700	1
CC	GO:0015934	large ribosomal subunit	1/600	229/21541	0.999968	Glyma.12G009600	1
CC	GO:0022626	cytosolic ribosome	1/600	270/21541	0.999968	Glyma.12G009600	1
CC	GO:0005730	nucleolus	1/600	285/21541	0.999968	Glyma.17G000100	1
CC	GO:0044391	ribosomal subunit	1/600	363/21541	0.999968	Glyma.12G009600	1
MF	GO:0004497	monooxygenase activity	34/710	377/22279	2.73579e-05	Glyma.16G109300/Glyma.08G140600/Glyma.14G150600/Glyma.17G118100/Glyma.19G015300/Glyma.12G067000/Glyma.13G173500/Glyma.13G078400/Glyma.13G253100/Glyma.08G114400/Glyma.01G179400/Glyma.17G069100/Glyma.15G156100/Glyma.01G175500/Glyma.16G133800/Glyma.15G061800/Glyma.14G205200/Glyma.02G236500/Glyma.03G143700/Glyma.17G227500/Glyma.11G062500/Glyma.13G068800/Glyma.16G195500/Glyma.09G049200/Glyma.06G035300…	34
MF	GO:0005506	iron ion binding	33/710	432/22279	0.000645578	Glyma.16G109300/Glyma.16G207800/Glyma.08G140600/Glyma.14G150600/Glyma.17G118100/Glyma.19G015300/Glyma.12G067000/Glyma.13G173500/Glyma.13G078400/Glyma.08G007200/Glyma.01G179400/Glyma.17G069100/Glyma.15G156100/Glyma.01G175500/Glyma.16G133800/Glyma.14G205200/Glyma.02G236500/Glyma.03G143700/Glyma.17G227500/Glyma.20G162600/Glyma.11G062500/Glyma.13G068800/Glyma.16G195500/Glyma.09G049200/Glyma.06G035300…	33
MF	GO:0016705	oxidoreductase activity, acting on paired donors, with incorporation or reduction of molecular oxygen	35/710	479/22279	0.000645578	Glyma.16G109300/Glyma.08G140600/Glyma.17G118100/Glyma.02G203300/Glyma.19G015300/Glyma.12G067000/Glyma.13G173500/Glyma.13G253100/Glyma.01G179400/Glyma.17G069100/Glyma.15G156100/Glyma.01G175500/Glyma.16G133800/Glyma.15G061800/Glyma.14G205200/Glyma.13G218200/Glyma.02G236500/Glyma.03G143700/Glyma.13G082300/Glyma.17G227500/Glyma.11G062500/Glyma.13G068800/Glyma.16G195500/Glyma.09G049200/Glyma.18G062000…	35
MF	GO:0004565	beta-galactosidase activity	8/710	32/22279	0.000645578	Glyma.02G051700/Glyma.11G073100/Glyma.04G028600/Glyma.13G327000/Glyma.07G010400/Glyma.15G023800/Glyma.09G062900/Glyma.06G157200	8
MF	GO:0015925	galactosidase activity	9/710	45/22279	0.000966262	Glyma.02G051700/Glyma.11G073100/Glyma.04G028600/Glyma.13G327000/Glyma.07G010400/Glyma.03G137900/Glyma.15G023800/Glyma.09G062900/Glyma.06G157200	9
MF	GO:0004601	peroxidase activity	18/710	189/22279	0.00267646	Glyma.11G101200/Glyma.17G078300/Glyma.05G021100/Glyma.06G145300/Glyma.11G161600/Glyma.04G220600/Glyma.20G169200/Glyma.01G222700/Glyma.02G127300/Glyma.12G073100/Glyma.07G263000/Glyma.09G277800/Glyma.17G177800/Glyma.19G011700/Glyma.09G277900/Glyma.15G128700/Glyma.08G018900/Glyma.02G135100	18
MF	GO:0016684	oxidoreductase activity, acting on peroxide as acceptor	18/710	190/22279	0.00267646	Glyma.11G101200/Glyma.17G078300/Glyma.05G021100/Glyma.06G145300/Glyma.11G161600/Glyma.04G220600/Glyma.20G169200/Glyma.01G222700/Glyma.02G127300/Glyma.12G073100/Glyma.07G263000/Glyma.09G277800/Glyma.17G177800/Glyma.19G011700/Glyma.09G277900/Glyma.15G128700/Glyma.08G018900/Glyma.02G135100	18
MF	GO:0043621	protein self-association	7/710	35/22279	0.00578389	Glyma.19G011400/Glyma.08G068700/Glyma.06G157800/Glyma.07G200200/Glyma.07G200700/Glyma.13G176200/Glyma.14G100000	7
MF	GO:0016709	oxidoreductase activity, acting on paired donors, with incorporation or reduction of molecular oxygen, NAD(P)H as one donor, and incorporation of one atom of oxygen	13/710	119/22279	0.00578389	Glyma.16G109300/Glyma.12G067000/Glyma.13G173500/Glyma.13G253100/Glyma.17G069100/Glyma.15G156100/Glyma.15G061800/Glyma.14G205200/Glyma.02G236500/Glyma.03G143700/Glyma.09G049200/Glyma.03G122000/Glyma.11G197400	13
MF	GO:0016209	antioxidant activity	19/710	232/22279	0.007922	Glyma.11G101200/Glyma.17G078300/Glyma.05G021100/Glyma.06G145300/Glyma.11G161600/Glyma.04G220600/Glyma.20G169200/Glyma.01G222700/Glyma.02G127300/Glyma.12G073100/Glyma.07G263000/Glyma.09G277800/Glyma.17G177800/Glyma.19G011700/Glyma.09G277900/Glyma.15G128700/Glyma.08G018900/Glyma.02G135100/Glyma.19G177600	19
MF	GO:0047372	acylglycerol lipase activity	4/710	10/22279	0.007922	Glyma.17G244200/Glyma.14G081500/Glyma.14G081200/Glyma.14G081300	4
MF	GO:0016701	oxidoreductase activity, acting on single donors with incorporation of molecular oxygen	10/710	85/22279	0.0136809	Glyma.19G115600/Glyma.16G207800/Glyma.14G150600/Glyma.13G078400/Glyma.03G264300/Glyma.08G114400/Glyma.07G034900/Glyma.19G263300/Glyma.03G237300/Glyma.15G026400	10
MF	GO:0004185	serine-type carboxypeptidase activity	8/710	56/22279	0.0136809	Glyma.13G183700/Glyma.10G102100/Glyma.03G070300/Glyma.16G145300/Glyma.07G236600/Glyma.13G029200/Glyma.20G178600/Glyma.09G226700	8
MF	GO:0070008	serine-type exopeptidase activity	8/710	58/22279	0.0162116	Glyma.13G183700/Glyma.10G102100/Glyma.03G070300/Glyma.16G145300/Glyma.07G236600/Glyma.13G029200/Glyma.20G178600/Glyma.09G226700	8
MF	GO:0016717	oxidoreductase activity, acting on paired donors, with oxidation of a pair of donors resulting in the reduction of molecular oxygen to two molecules of water	5/710	22/22279	0.0171407	Glyma.02G203300/Glyma.12G067000/Glyma.18G062000/Glyma.09G111900/Glyma.02G227200	5
MF	GO:0016210	naringenin-chalcone synthase activity	4/710	13/22279	0.0171785	Glyma.09G075200/Glyma.01G091400/Glyma.08G110500/Glyma.19G105100	4
MF	GO:0051287	NAD binding	12/710	125/22279	0.0183601	Glyma.08G047800/Glyma.11G247600/Glyma.09G262900/Glyma.17G027300/Glyma.10G018400/Glyma.19G211300/Glyma.09G014200/Glyma.10G261400/Glyma.05G022600/Glyma.15G019300/Glyma.15G118900/Glyma.19G009000	12
MF	GO:0016174	NAD(P)H oxidase H2O2-forming activity	4/710	15/22279	0.0277065	Glyma.17G078300/Glyma.05G021100/Glyma.01G222700/Glyma.08G018900	4
MF	GO:0004180	carboxypeptidase activity	8/710	66/22279	0.0286245	Glyma.13G183700/Glyma.10G102100/Glyma.03G070300/Glyma.16G145300/Glyma.07G236600/Glyma.13G029200/Glyma.20G178600/Glyma.09G226700	8
MF	GO:0008171	O-methyltransferase activity	8/710	67/22279	0.0286245	Glyma.09G094600/Glyma.09G281800/Glyma.06G137100/Glyma.04G227700/Glyma.07G048900/Glyma.01G187700/Glyma.02G103500/Glyma.14G201100	8
MF	GO:0016682	oxidoreductase activity, acting on diphenols and related substances as donors, oxygen as acceptor	8/710	67/22279	0.0286245	Glyma.04G123800/Glyma.14G062300/Glyma.11G137500/Glyma.14G198900/Glyma.20G051700/Glyma.02G231600/Glyma.06G270400/Glyma.18G225000	8
MF	GO:0050664	oxidoreductase activity, acting on NAD(P)H, oxygen as acceptor	4/710	16/22279	0.029468	Glyma.17G078300/Glyma.05G021100/Glyma.01G222700/Glyma.08G018900	4
MF	GO:0016679	oxidoreductase activity, acting on diphenols and related substances as donors	8/710	75/22279	0.0541504	Glyma.04G123800/Glyma.14G062300/Glyma.11G137500/Glyma.14G198900/Glyma.20G051700/Glyma.02G231600/Glyma.06G270400/Glyma.18G225000	8
MF	GO:0010277	chlorophyllide a oxygenase [overall] activity	3/710	10/22279	0.0644551	Glyma.14G150600/Glyma.13G078400/Glyma.08G114400	3
MF	GO:0004525	ribonuclease III activity	4/710	21/22279	0.0722576	Glyma.09G025400/Glyma.03G262100/Glyma.19G261200/Glyma.17G104100	4
MF	GO:0032296	double-stranded RNA-specific ribonuclease activity	4/710	21/22279	0.0722576	Glyma.09G025400/Glyma.03G262100/Glyma.19G261200/Glyma.17G104100	4
MF	GO:0016829	lyase activity	23/710	395/22279	0.0741772	Glyma.08G091500/Glyma.13G257200/Glyma.11G111400/Glyma.16G162400/Glyma.07G059000/Glyma.15G110500/Glyma.01G118000/Glyma.11G244900/Glyma.01G239600/Glyma.13G001200/Glyma.18G175300/Glyma.17G027300/Glyma.10G018400/Glyma.09G153900/Glyma.19G211300/Glyma.04G074500/Glyma.02G309300/Glyma.12G181800/Glyma.11G029500/Glyma.04G050400/Glyma.03G147700/Glyma.15G128000/Glyma.16G034300	23
MF	GO:0016703	oxidoreductase activity, acting on single donors with incorporation of molecular oxygen, incorporation of one atom of oxygen (internal monooxygenases or internal mixed function oxidases)	3/710	11/22279	0.0741772	Glyma.14G150600/Glyma.13G078400/Glyma.08G114400	3
MF	GO:0048040	UDP-glucuronate decarboxylase activity	3/710	12/22279	0.092308	Glyma.17G027300/Glyma.10G018400/Glyma.19G211300	3
MF	GO:0016830	carbon-carbon lyase activity	11/710	142/22279	0.092308	Glyma.08G091500/Glyma.11G111400/Glyma.07G059000/Glyma.01G118000/Glyma.17G027300/Glyma.10G018400/Glyma.19G211300/Glyma.04G074500/Glyma.11G029500/Glyma.15G128000/Glyma.16G034300	11
MF	GO:0015267	channel activity	16/710	249/22279	0.0949469	Glyma.20G179700/Glyma.15G003900/Glyma.06G307000/Glyma.18G259500/Glyma.14G212500/Glyma.02G059200/Glyma.01G178500/Glyma.16G155100/Glyma.09G168600/Glyma.15G087300/Glyma.03G185900/Glyma.06G055400/Glyma.19G221000/Glyma.08G187600/Glyma.11G143100/Glyma.10G211000	16
MF	GO:0022803	passive transmembrane transporter activity	16/710	249/22279	0.0949469	Glyma.20G179700/Glyma.15G003900/Glyma.06G307000/Glyma.18G259500/Glyma.14G212500/Glyma.02G059200/Glyma.01G178500/Glyma.16G155100/Glyma.09G168600/Glyma.15G087300/Glyma.03G185900/Glyma.06G055400/Glyma.19G221000/Glyma.08G187600/Glyma.11G143100/Glyma.10G211000	16
MF	GO:0005507	copper ion binding	9/710	107/22279	0.103462	Glyma.14G062300/Glyma.11G137500/Glyma.17G261500/Glyma.14G198900/Glyma.05G056100/Glyma.20G051700/Glyma.02G231600/Glyma.04G019500/Glyma.17G138300	9
MF	GO:0033293	monocarboxylic acid binding	7/710	76/22279	0.147352	Glyma.07G243600/Glyma.15G145600/Glyma.18G191800/Glyma.09G040500/Glyma.07G243500/Glyma.07G141500/Glyma.18G152400	7
MF	GO:0016872	intramolecular lyase activity	3/710	15/22279	0.148831	Glyma.20G241700/Glyma.10G292200/Glyma.20G241600	3
MF	GO:0008238	exopeptidase activity	8/710	101/22279	0.202701	Glyma.13G183700/Glyma.10G102100/Glyma.03G070300/Glyma.16G145300/Glyma.07G236600/Glyma.13G029200/Glyma.20G178600/Glyma.09G226700	8
MF	GO:0016614	oxidoreductase activity, acting on CH-OH group of donors	16/710	276/22279	0.205388	Glyma.02G108400/Glyma.14G156400/Glyma.19G038400/Glyma.18G285800/Glyma.09G262900/Glyma.14G072700/Glyma.01G102900/Glyma.16G019900/Glyma.09G218100/Glyma.10G261400/Glyma.05G022600/Glyma.15G019300/Glyma.19G009000/Glyma.12G238200/Glyma.09G269400/Glyma.13G369800	16
MF	GO:0004540	ribonuclease activity	9/710	123/22279	0.211699	Glyma.09G161400/Glyma.09G025400/Glyma.03G262100/Glyma.19G261200/Glyma.09G040500/Glyma.16G111800/Glyma.17G104100/Glyma.19G005800/Glyma.03G247500	9
MF	GO:0016891	endoribonuclease activity, producing 5'-phosphomonoesters	5/710	48/22279	0.217545	Glyma.09G161400/Glyma.09G025400/Glyma.03G262100/Glyma.19G261200/Glyma.17G104100	5
MF	GO:0031406	carboxylic acid binding	9/710	126/22279	0.228162	Glyma.07G243600/Glyma.05G152100/Glyma.06G052100/Glyma.15G145600/Glyma.18G191800/Glyma.09G040500/Glyma.07G243500/Glyma.07G141500/Glyma.18G152400	9
MF	GO:0016702	oxidoreductase activity, acting on single donors with incorporation of molecular oxygen, incorporation of two atoms of oxygen	6/710	67/22279	0.228162	Glyma.19G115600/Glyma.03G264300/Glyma.07G034900/Glyma.19G263300/Glyma.03G237300/Glyma.15G026400	6
MF	GO:0004521	endoribonuclease activity	6/710	71/22279	0.287677	Glyma.09G161400/Glyma.09G025400/Glyma.03G262100/Glyma.19G261200/Glyma.16G111800/Glyma.17G104100	6
MF	GO:0004364	glutathione transferase activity	6/710	72/22279	0.298578	Glyma.07G139700/Glyma.20G101100/Glyma.11G198500/Glyma.05G161600/Glyma.02G024800/Glyma.05G161400	6
MF	GO:0008375	acetylglucosaminyltransferase activity	4/710	37/22279	0.310142	Glyma.18G035900/Glyma.08G017000/Glyma.12G101600/Glyma.06G302400	4
MF	GO:0016762	xyloglucan:xyloglucosyl transferase activity	5/710	55/22279	0.310142	Glyma.11G253900/Glyma.02G068900/Glyma.01G196800/Glyma.09G062600/Glyma.20G141800	5
MF	GO:0000146	microfilament motor activity	3/710	22/22279	0.310142	Glyma.08G161500/Glyma.10G286300/Glyma.15G266300	3
MF	GO:0070403	NAD+ binding	3/710	22/22279	0.310142	Glyma.17G027300/Glyma.10G018400/Glyma.19G211300	3
MF	GO:0051082	unfolded protein binding	11/710	182/22279	0.310142	Glyma.19G011400/Glyma.08G068700/Glyma.16G178800/Glyma.06G157800/Glyma.16G111800/Glyma.18G127500/Glyma.02G305600/Glyma.07G200200/Glyma.07G200700/Glyma.13G176200/Glyma.14G100000	11
MF	GO:0016831	carboxy-lyase activity	7/710	95/22279	0.310142	Glyma.08G091500/Glyma.07G059000/Glyma.01G118000/Glyma.17G027300/Glyma.10G018400/Glyma.19G211300/Glyma.15G128000	7
MF	GO:0043178	alcohol binding	5/710	58/22279	0.348213	Glyma.07G243600/Glyma.15G145600/Glyma.09G040500/Glyma.07G225600/Glyma.07G243500	5
MF	GO:0010427	abscisic acid binding	4/710	41/22279	0.348213	Glyma.07G243600/Glyma.15G145600/Glyma.09G040500/Glyma.07G243500	4
MF	GO:0016620	oxidoreductase activity, acting on the aldehyde or oxo group of donors, NAD or NADP as acceptor	6/710	80/22279	0.348213	Glyma.08G047800/Glyma.02G202500/Glyma.11G247600/Glyma.17G075300/Glyma.19G009000/Glyma.02G218300	6
MF	GO:0016903	oxidoreductase activity, acting on the aldehyde or oxo group of donors	7/710	102/22279	0.348213	Glyma.08G047800/Glyma.02G202500/Glyma.11G247600/Glyma.17G075300/Glyma.06G120300/Glyma.19G009000/Glyma.02G218300	7
MF	GO:0001664	G protein-coupled receptor binding	2/710	11/22279	0.348213	Glyma.17G226700/Glyma.14G098000	2
MF	GO:0004097	catechol oxidase activity	2/710	11/22279	0.348213	Glyma.06G270400/Glyma.18G225000	2
MF	GO:0015292	uniporter activity	2/710	11/22279	0.348213	Glyma.02G059200/Glyma.01G178500	2
MF	GO:0016987	sigma factor activity	2/710	11/22279	0.348213	Glyma.06G125700/Glyma.14G160600	2
MF	GO:0045309	protein phosphorylated amino acid binding	2/710	11/22279	0.348213	Glyma.01G234600/Glyma.11G008300	2
MF	GO:0050815	phosphoserine residue binding	2/710	11/22279	0.348213	Glyma.01G234600/Glyma.11G008300	2
MF	GO:0051219	phosphoprotein binding	2/710	11/22279	0.348213	Glyma.01G234600/Glyma.11G008300	2
MF	GO:0099122	RNA polymerase II C-terminal domain binding	2/710	11/22279	0.348213	Glyma.01G234600/Glyma.11G008300	2
MF	GO:1990269	RNA polymerase II C-terminal domain phosphoserine binding	2/710	11/22279	0.348213	Glyma.01G234600/Glyma.11G008300	2
MF	GO:0016651	oxidoreductase activity, acting on NAD(P)H	7/710	103/22279	0.348213	Glyma.17G078300/Glyma.05G021100/Glyma.08G059300/Glyma.12G045300/Glyma.01G222700/Glyma.13G246600/Glyma.08G018900	7
MF	GO:0016893	endonuclease activity, active with either ribo- or deoxyribonucleic acids and producing 5'-phosphomonoesters	5/710	62/22279	0.348213	Glyma.09G161400/Glyma.09G025400/Glyma.03G262100/Glyma.19G261200/Glyma.17G104100	5
MF	GO:0015645	fatty acid ligase activity	3/710	26/22279	0.348213	Glyma.08G204300/Glyma.03G221400/Glyma.09G138100	3
MF	GO:0016616	oxidoreductase activity, acting on the CH-OH group of donors, NAD or NADP as acceptor	13/710	244/22279	0.348213	Glyma.14G156400/Glyma.19G038400/Glyma.18G285800/Glyma.09G262900/Glyma.14G072700/Glyma.01G102900/Glyma.10G261400/Glyma.05G022600/Glyma.15G019300/Glyma.19G009000/Glyma.12G238200/Glyma.09G269400/Glyma.13G369800	13
MF	GO:0003774	cytoskeletal motor activity	6/710	84/22279	0.348213	Glyma.08G161500/Glyma.15G256400/Glyma.03G237800/Glyma.10G286300/Glyma.05G149700/Glyma.15G266300	6
MF	GO:0031625	ubiquitin protein ligase binding	6/710	84/22279	0.348213	Glyma.12G140200/Glyma.15G064900/Glyma.06G258200/Glyma.07G225600/Glyma.03G054900/Glyma.20G018500	6
MF	GO:0008168	methyltransferase activity	20/710	423/22279	0.348213	Glyma.05G152100/Glyma.06G283400/Glyma.20G101000/Glyma.06G249400/Glyma.09G213100/Glyma.11G232400/Glyma.09G094600/Glyma.20G229400/Glyma.09G281800/Glyma.10G292500/Glyma.06G137100/Glyma.04G227700/Glyma.01G046700/Glyma.07G048900/Glyma.16G038300/Glyma.08G001200/Glyma.14G018100/Glyma.01G187700/Glyma.02G103500/Glyma.14G201100	20
MF	GO:0008553	P-type proton-exporting transporter activity	3/710	27/22279	0.348213	Glyma.14G134100/Glyma.03G262600/Glyma.17G061800	3
MF	GO:0016868	intramolecular transferase activity, phosphotransferases	3/710	27/22279	0.348213	Glyma.02G217600/Glyma.04G104500/Glyma.06G105600	3
MF	GO:0035529	NADH pyrophosphatase activity	2/710	12/22279	0.348213	Glyma.09G014200/Glyma.15G118900	2
MF	GO:0047631	ADP-ribose diphosphatase activity	2/710	12/22279	0.348213	Glyma.09G014200/Glyma.15G118900	2
MF	GO:0016405	CoA-ligase activity	4/710	45/22279	0.348213	Glyma.08G204300/Glyma.17G064400/Glyma.03G221400/Glyma.09G138100	4
MF	GO:0019840	isoprenoid binding	4/710	46/22279	0.362378	Glyma.07G243600/Glyma.15G145600/Glyma.09G040500/Glyma.07G243500	4
MF	GO:0052716	hydroquinone:oxygen oxidoreductase activity	4/710	46/22279	0.362378	Glyma.14G062300/Glyma.11G137500/Glyma.14G198900/Glyma.02G231600	4
MF	GO:0042562	hormone binding	4/710	47/22279	0.370759	Glyma.07G243600/Glyma.15G145600/Glyma.09G040500/Glyma.07G243500	4
MF	GO:0004470	malic enzyme activity	2/710	13/22279	0.370759	Glyma.09G262900/Glyma.15G019300	2
MF	GO:0004471	malate dehydrogenase (decarboxylating) (NAD+) activity	2/710	13/22279	0.370759	Glyma.09G262900/Glyma.15G019300	2
MF	GO:0031683	G-protein beta/gamma-subunit complex binding	2/710	13/22279	0.370759	Glyma.17G226700/Glyma.14G098000	2
MF	GO:0044389	ubiquitin-like protein ligase binding	6/710	89/22279	0.378346	Glyma.12G140200/Glyma.15G064900/Glyma.06G258200/Glyma.07G225600/Glyma.03G054900/Glyma.20G018500	6
MF	GO:0042626	ATPase-coupled transmembrane transporter activity	14/710	281/22279	0.387284	Glyma.14G127800/Glyma.14G134100/Glyma.05G192700/Glyma.03G168000/Glyma.15G012000/Glyma.03G101000/Glyma.10G019000/Glyma.16G076900/Glyma.14G015300/Glyma.03G262600/Glyma.19G202200/Glyma.07G121900/Glyma.17G061800/Glyma.03G167800	14
MF	GO:0005267	potassium channel activity	3/710	30/22279	0.391037	Glyma.14G212500/Glyma.19G221000/Glyma.08G187600	3
MF	GO:0030246	carbohydrate binding	14/710	283/22279	0.391037	Glyma.02G046800/Glyma.01G223900/Glyma.02G051700/Glyma.11G073100/Glyma.09G028000/Glyma.11G036100/Glyma.03G051100/Glyma.19G017200/Glyma.13G327000/Glyma.07G010400/Glyma.15G023800/Glyma.18G294400/Glyma.06G157200/Glyma.05G217000	14
MF	GO:0051537	2 iron, 2 sulfur cluster binding	4/710	49/22279	0.391037	Glyma.14G150600/Glyma.13G078400/Glyma.08G126800/Glyma.08G114400	4
MF	GO:0030976	thiamine pyrophosphate binding	2/710	14/22279	0.394104	Glyma.06G169700/Glyma.01G118000	2
MF	GO:0016985	mannan endo-1,4-beta-mannosidase activity	3/710	31/22279	0.402839	Glyma.04G030400/Glyma.17G252400/Glyma.06G030500	3
MF	GO:0030570	pectate lyase activity	3/710	31/22279	0.402839	Glyma.15G110500/Glyma.11G244900/Glyma.18G175300	3
MF	GO:0015923	mannosidase activity	4/710	51/22279	0.411891	Glyma.02G046800/Glyma.04G030400/Glyma.17G252400/Glyma.06G030500	4
MF	GO:0016741	transferase activity, transferring one-carbon groups	20/710	446/22279	0.411891	Glyma.05G152100/Glyma.06G283400/Glyma.20G101000/Glyma.06G249400/Glyma.09G213100/Glyma.11G232400/Glyma.09G094600/Glyma.20G229400/Glyma.09G281800/Glyma.10G292500/Glyma.06G137100/Glyma.04G227700/Glyma.01G046700/Glyma.07G048900/Glyma.16G038300/Glyma.08G001200/Glyma.14G018100/Glyma.01G187700/Glyma.02G103500/Glyma.14G201100	20
MF	GO:0004568	chitinase activity	3/710	32/22279	0.411891	Glyma.12G156600/Glyma.17G217000/Glyma.02G042500	3
MF	GO:0008574	plus-end-directed microtubule motor activity	3/710	32/22279	0.411891	Glyma.15G256400/Glyma.03G237800/Glyma.05G149700	3
MF	GO:0004805	trehalose-phosphatase activity	2/710	15/22279	0.411891	Glyma.09G231400/Glyma.14G171700	2
MF	GO:0016298	lipase activity	7/710	118/22279	0.419523	Glyma.17G244200/Glyma.14G081500/Glyma.04G020400/Glyma.14G081200/Glyma.08G056600/Glyma.07G044200/Glyma.14G081300	7
MF	GO:0051213	dioxygenase activity	11/710	216/22279	0.428402	Glyma.19G115600/Glyma.03G264300/Glyma.07G034900/Glyma.06G137000/Glyma.13G218200/Glyma.19G263300/Glyma.13G082300/Glyma.11G027700/Glyma.02G268200/Glyma.03G237300/Glyma.15G026400	11
MF	GO:0005262	calcium channel activity	2/710	16/22279	0.436801	Glyma.02G059200/Glyma.01G178500	2
MF	GO:0004864	protein phosphatase inhibitor activity	4/710	54/22279	0.436801	Glyma.07G243600/Glyma.15G145600/Glyma.09G040500/Glyma.07G243500	4
MF	GO:0034594	phosphatidylinositol trisphosphate phosphatase activity	3/710	34/22279	0.436801	Glyma.20G170500/Glyma.07G107000/Glyma.08G241500	3
MF	GO:0016887	ATP hydrolysis activity	15/710	324/22279	0.436801	Glyma.03G068100/Glyma.14G134100/Glyma.15G256400/Glyma.16G178800/Glyma.03G237800/Glyma.13G066100/Glyma.11G020300/Glyma.14G067000/Glyma.02G305600/Glyma.04G232200/Glyma.03G262600/Glyma.05G149700/Glyma.17G061800/Glyma.20G017200/Glyma.09G127000	15
MF	GO:0019212	phosphatase inhibitor activity	4/710	55/22279	0.436801	Glyma.07G243600/Glyma.15G145600/Glyma.09G040500/Glyma.07G243500	4
MF	GO:0004620	phospholipase activity	5/710	77/22279	0.436801	Glyma.17G244200/Glyma.14G081500/Glyma.04G020400/Glyma.14G081200/Glyma.14G081300	5
MF	GO:0004567	beta-mannosidase activity	3/710	35/22279	0.436801	Glyma.04G030400/Glyma.17G252400/Glyma.06G030500	3
MF	GO:0005504	fatty acid binding	3/710	35/22279	0.436801	Glyma.18G191800/Glyma.07G141500/Glyma.18G152400	3
MF	GO:0004551	nucleotide diphosphatase activity	2/710	17/22279	0.436801	Glyma.09G014200/Glyma.15G118900	2
MF	GO:0016161	beta-amylase activity	2/710	17/22279	0.436801	Glyma.01G151800/Glyma.09G168300	2
MF	GO:0016899	oxidoreductase activity, acting on the CH-OH group of donors, oxygen as acceptor	2/710	17/22279	0.436801	Glyma.16G019900/Glyma.09G218100	2
MF	GO:0045505	dynein intermediate chain binding	2/710	17/22279	0.436801	Glyma.12G223500/Glyma.13G277800	2
MF	GO:0051959	dynein light intermediate chain binding	2/710	17/22279	0.436801	Glyma.12G223500/Glyma.13G277800	2
MF	GO:0102229	amylopectin maltohydrolase activity	2/710	17/22279	0.436801	Glyma.01G151800/Glyma.09G168300	2
MF	GO:0016413	O-acetyltransferase activity	6/710	101/22279	0.440651	Glyma.01G034900/Glyma.11G150900/Glyma.13G291700/Glyma.01G034300/Glyma.12G233500/Glyma.07G205200	6
MF	GO:0016765	transferase activity, transferring alkyl or aryl (other than methyl) groups	10/710	199/22279	0.440651	Glyma.07G139700/Glyma.02G283400/Glyma.05G042400/Glyma.20G101100/Glyma.11G198500/Glyma.05G161600/Glyma.02G208400/Glyma.02G024800/Glyma.05G161400/Glyma.05G036300	10
MF	GO:0005372	water transmembrane transporter activity	3/710	36/22279	0.440651	Glyma.20G179700/Glyma.06G307000/Glyma.16G155100	3
MF	GO:0015250	water channel activity	3/710	36/22279	0.440651	Glyma.20G179700/Glyma.06G307000/Glyma.16G155100	3
MF	GO:0016878	acid-thiol ligase activity	3/710	36/22279	0.440651	Glyma.08G204300/Glyma.03G221400/Glyma.09G138100	3
MF	GO:0003756	protein disulfide isomerase activity	2/710	18/22279	0.452368	Glyma.11G146800/Glyma.03G232000	2
MF	GO:0016864	intramolecular oxidoreductase activity, transposing S-S bonds	2/710	18/22279	0.452368	Glyma.11G146800/Glyma.03G232000	2
MF	GO:0005509	calcium ion binding	17/710	389/22279	0.479915	Glyma.07G101100/Glyma.05G178700/Glyma.08G244800/Glyma.04G020400/Glyma.20G034200/Glyma.08G059300/Glyma.12G227800/Glyma.10G217000/Glyma.14G051800/Glyma.19G160100/Glyma.01G222700/Glyma.13G200000/Glyma.07G229500/Glyma.13G246600/Glyma.15G030100/Glyma.08G018900/Glyma.17G229500	17
MF	GO:0016837	carbon-oxygen lyase activity, acting on polysaccharides	3/710	38/22279	0.480685	Glyma.15G110500/Glyma.11G244900/Glyma.18G175300	3
MF	GO:0004575	sucrose alpha-glucosidase activity	2/710	19/22279	0.48286	Glyma.17G138500/Glyma.05G056300	2
MF	GO:0008236	serine-type peptidase activity	11/710	232/22279	0.48527	Glyma.13G183700/Glyma.13G100100/Glyma.08G109000/Glyma.10G102100/Glyma.03G070300/Glyma.05G152200/Glyma.16G145300/Glyma.07G236600/Glyma.13G029200/Glyma.20G178600/Glyma.09G226700	11
MF	GO:0017171	serine hydrolase activity	11/710	232/22279	0.48527	Glyma.13G183700/Glyma.13G100100/Glyma.08G109000/Glyma.10G102100/Glyma.03G070300/Glyma.05G152200/Glyma.16G145300/Glyma.07G236600/Glyma.13G029200/Glyma.20G178600/Glyma.09G226700	11
MF	GO:0004032	alditol:NADP+ 1-oxidoreductase activity	2/710	20/22279	0.492564	Glyma.18G285800/Glyma.01G102900	2
MF	GO:0004564	beta-fructofuranosidase activity	2/710	20/22279	0.492564	Glyma.17G138500/Glyma.05G056300	2
MF	GO:0008106	alcohol dehydrogenase (NADP+) activity	2/710	20/22279	0.492564	Glyma.18G285800/Glyma.01G102900	2
MF	GO:0016832	aldehyde-lyase activity	2/710	20/22279	0.492564	Glyma.11G111400/Glyma.16G034300	2
MF	GO:0050997	quaternary ammonium group binding	2/710	20/22279	0.492564	Glyma.06G169700/Glyma.01G118000	2
MF	GO:0090599	alpha-glucosidase activity	2/710	20/22279	0.492564	Glyma.17G138500/Glyma.05G056300	2
MF	GO:0043177	organic acid binding	6/710	110/22279	0.513637	Glyma.07G243600/Glyma.05G152100/Glyma.06G052100/Glyma.15G145600/Glyma.09G040500/Glyma.07G243500	6
MF	GO:0004033	aldo-keto reductase (NADP) activity	2/710	21/22279	0.513637	Glyma.18G285800/Glyma.01G102900	2
MF	GO:0008061	chitin binding	2/710	21/22279	0.513637	Glyma.17G217000/Glyma.02G042500	2
MF	GO:0016884	carbon-nitrogen ligase activity, with glutamine as amido-N-donor	2/710	21/22279	0.513637	Glyma.18G061100/Glyma.11G170300	2
MF	GO:0106310	protein serine kinase activity	11/710	239/22279	0.513637	Glyma.12G140200/Glyma.18G236800/Glyma.15G084100/Glyma.15G064900/Glyma.13G248900/Glyma.13G210300/Glyma.10G001700/Glyma.06G258200/Glyma.03G054900/Glyma.20G145800/Glyma.18G021600	11
MF	GO:0042973	glucan endo-1,3-beta-D-glucosidase activity	4/710	65/22279	0.536968	Glyma.11G095100/Glyma.12G185200/Glyma.11G095000/Glyma.09G037100	4
MF	GO:0008378	galactosyltransferase activity	2/710	22/22279	0.536968	Glyma.05G003900/Glyma.20G094500	2
MF	GO:0016160	amylase activity	2/710	22/22279	0.536968	Glyma.01G151800/Glyma.09G168300	2
MF	GO:0016615	malate dehydrogenase activity	2/710	22/22279	0.536968	Glyma.09G262900/Glyma.15G019300	2
MF	GO:0016877	ligase activity, forming carbon-sulfur bonds	4/710	66/22279	0.548733	Glyma.08G204300/Glyma.17G064400/Glyma.03G221400/Glyma.09G138100	4
MF	GO:0005249	voltage-gated potassium channel activity	2/710	23/22279	0.5639	Glyma.14G212500/Glyma.08G187600	2
MF	GO:0016744	transketolase or transaldolase activity	2/710	23/22279	0.5639	Glyma.06G169700/Glyma.08G277000	2
MF	GO:0030170	pyridoxal phosphate binding	7/710	143/22279	0.573986	Glyma.08G091500/Glyma.05G152100/Glyma.06G052100/Glyma.07G059000/Glyma.13G001200/Glyma.18G238100/Glyma.15G128000	7
MF	GO:0070279	vitamin B6 binding	7/710	143/22279	0.573986	Glyma.08G091500/Glyma.05G152100/Glyma.06G052100/Glyma.07G059000/Glyma.13G001200/Glyma.18G238100/Glyma.15G128000	7
MF	GO:0005261	cation channel activity	5/710	93/22279	0.573986	Glyma.14G212500/Glyma.02G059200/Glyma.01G178500/Glyma.19G221000/Glyma.08G187600	5
MF	GO:0051015	actin filament binding	5/710	93/22279	0.573986	Glyma.08G161500/Glyma.17G092600/Glyma.10G286300/Glyma.14G005200/Glyma.15G266300	5
MF	GO:0016853	isomerase activity	14/710	332/22279	0.573986	Glyma.20G241700/Glyma.01G223900/Glyma.11G146800/Glyma.05G149900/Glyma.02G217600/Glyma.10G292200/Glyma.03G086200/Glyma.19G017200/Glyma.03G147700/Glyma.04G104500/Glyma.03G232000/Glyma.20G241600/Glyma.06G105600/Glyma.18G272200	14
MF	GO:0004029	aldehyde dehydrogenase (NAD+) activity	2/710	24/22279	0.573986	Glyma.02G202500/Glyma.17G075300	2
MF	GO:0004030	aldehyde dehydrogenase [NAD(P)+] activity	2/710	24/22279	0.573986	Glyma.02G202500/Glyma.17G075300	2
MF	GO:0019842	vitamin binding	9/710	199/22279	0.598552	Glyma.08G091500/Glyma.05G152100/Glyma.06G169700/Glyma.06G052100/Glyma.07G059000/Glyma.01G118000/Glyma.13G001200/Glyma.18G238100/Glyma.15G128000	9
MF	GO:0044183	protein folding chaperone	2/710	25/22279	0.603227	Glyma.18G070500/Glyma.08G335500	2
MF	GO:0015399	primary active transmembrane transporter activity	14/710	337/22279	0.604431	Glyma.14G127800/Glyma.14G134100/Glyma.05G192700/Glyma.03G168000/Glyma.15G012000/Glyma.03G101000/Glyma.10G019000/Glyma.16G076900/Glyma.14G015300/Glyma.03G262600/Glyma.19G202200/Glyma.07G121900/Glyma.17G061800/Glyma.03G167800	14
MF	GO:0004518	nuclease activity	10/710	228/22279	0.607691	Glyma.09G161400/Glyma.09G025400/Glyma.03G262100/Glyma.19G261200/Glyma.09G040500/Glyma.16G111800/Glyma.17G104100/Glyma.06G155300/Glyma.19G005800/Glyma.03G247500	10
MF	GO:0004519	endonuclease activity	6/710	122/22279	0.607691	Glyma.09G161400/Glyma.09G025400/Glyma.03G262100/Glyma.19G261200/Glyma.16G111800/Glyma.17G104100	6
MF	GO:0008374	O-acyltransferase activity	8/710	175/22279	0.607691	Glyma.01G034900/Glyma.11G150900/Glyma.03G221100/Glyma.13G291700/Glyma.01G034300/Glyma.12G233500/Glyma.07G205200/Glyma.09G239600	8
MF	GO:0005544	calcium-dependent phospholipid binding	2/710	26/22279	0.607691	Glyma.05G178700/Glyma.13G200000	2
MF	GO:0016597	amino acid binding	2/710	26/22279	0.607691	Glyma.05G152100/Glyma.06G052100	2
MF	GO:0016846	carbon-sulfur lyase activity	2/710	26/22279	0.607691	Glyma.16G162400/Glyma.13G001200	2
MF	GO:0140326	ATPase-coupled intramembrane lipid transporter activity	2/710	26/22279	0.607691	Glyma.04G129200/Glyma.04G144900	2
MF	GO:0016860	intramolecular oxidoreductase activity	4/710	74/22279	0.629905	Glyma.11G146800/Glyma.19G017200/Glyma.03G147700/Glyma.03G232000	4
MF	GO:0008198	ferrous iron binding	2/710	27/22279	0.629905	Glyma.16G207800/Glyma.11G232600	2
MF	GO:0140303	intramembrane lipid transporter activity	2/710	27/22279	0.629905	Glyma.04G129200/Glyma.04G144900	2
MF	GO:0016628	oxidoreductase activity, acting on the CH-CH group of donors, NAD or NADP as acceptor	3/710	50/22279	0.629905	Glyma.17G049900/Glyma.08G062000/Glyma.11G070500	3
MF	GO:0004707	MAP kinase activity	2/710	28/22279	0.654017	Glyma.18G236800/Glyma.13G210300	2
MF	GO:0022843	voltage-gated cation channel activity	2/710	28/22279	0.654017	Glyma.14G212500/Glyma.08G187600	2
MF	GO:0005102	signaling receptor binding	3/710	52/22279	0.667149	Glyma.17G226700/Glyma.14G098000/Glyma.17G159000	3
MF	GO:0008757	S-adenosylmethionine-dependent methyltransferase activity	9/710	211/22279	0.670116	Glyma.20G101000/Glyma.09G094600/Glyma.20G229400/Glyma.09G281800/Glyma.10G292500/Glyma.04G227700/Glyma.07G048900/Glyma.02G103500/Glyma.14G201100	9
MF	GO:0015926	glucosidase activity	6/710	130/22279	0.672072	Glyma.17G138500/Glyma.11G095100/Glyma.12G185200/Glyma.11G095000/Glyma.05G056300/Glyma.09G037100	6
MF	GO:0034485	phosphatidylinositol-3,4,5-trisphosphate 5-phosphatase activity	2/710	29/22279	0.672072	Glyma.20G170500/Glyma.07G107000	2
MF	GO:0042910	xenobiotic transmembrane transporter activity	4/710	78/22279	0.672294	Glyma.01G025200/Glyma.03G005600/Glyma.05G001700/Glyma.14G032400	4
MF	GO:0016866	intramolecular transferase activity	4/710	79/22279	0.687783	Glyma.02G217600/Glyma.04G104500/Glyma.06G105600/Glyma.18G272200	4
MF	GO:0052866	phosphatidylinositol phosphate phosphatase activity	3/710	54/22279	0.689368	Glyma.20G170500/Glyma.07G107000/Glyma.08G241500	3
MF	GO:0000993	RNA polymerase II complex binding	2/710	30/22279	0.689368	Glyma.01G234600/Glyma.11G008300	2
MF	GO:0008092	cytoskeletal protein binding	16/710	415/22279	0.698287	Glyma.08G161500/Glyma.03G217000/Glyma.15G256400/Glyma.17G092600/Glyma.03G237800/Glyma.01G168200/Glyma.10G286300/Glyma.07G120900/Glyma.05G085400/Glyma.14G085200/Glyma.05G149700/Glyma.14G005200/Glyma.15G266300/Glyma.09G013100/Glyma.09G198200/Glyma.20G018500	16
MF	GO:0001098	basal transcription machinery binding	2/710	31/22279	0.705919	Glyma.01G234600/Glyma.11G008300	2
MF	GO:0001099	basal RNA polymerase II transcription machinery binding	2/710	31/22279	0.705919	Glyma.01G234600/Glyma.11G008300	2
MF	GO:0070566	adenylyltransferase activity	2/710	31/22279	0.705919	Glyma.17G150300/Glyma.06G030400	2
MF	GO:0016758	hexosyltransferase activity	17/710	448/22279	0.708515	Glyma.11G253900/Glyma.18G035900/Glyma.08G017000/Glyma.08G309900/Glyma.13G276600/Glyma.02G068900/Glyma.01G196800/Glyma.05G003900/Glyma.20G094500/Glyma.09G062600/Glyma.13G065900/Glyma.12G101600/Glyma.13G084600/Glyma.20G141800/Glyma.19G190600/Glyma.15G234700/Glyma.06G302400	17
MF	GO:0015662	P-type ion transporter activity	3/710	57/22279	0.708515	Glyma.14G134100/Glyma.03G262600/Glyma.17G061800	3
MF	GO:0140358	P-type transmembrane transporter activity	3/710	57/22279	0.708515	Glyma.14G134100/Glyma.03G262600/Glyma.17G061800	3
MF	GO:0016835	carbon-oxygen lyase activity	7/710	165/22279	0.708515	Glyma.13G257200/Glyma.15G110500/Glyma.11G244900/Glyma.01G239600/Glyma.18G175300/Glyma.09G153900/Glyma.12G181800	7
MF	GO:0004634	phosphopyruvate hydratase activity	1/710	10/22279	0.708515	Glyma.09G153900	1
MF	GO:0004766	spermidine synthase activity	1/710	10/22279	0.708515	Glyma.05G036300	1
MF	GO:0008296	3'-5'-exodeoxyribonuclease activity	1/710	10/22279	0.708515	Glyma.06G155300	1
MF	GO:0008661	1-deoxy-D-xylulose-5-phosphate synthase activity	1/710	10/22279	0.708515	Glyma.08G277000	1
MF	GO:0070905	serine binding	1/710	10/22279	0.708515	Glyma.05G152100	1
MF	GO:1990757	ubiquitin ligase activator activity	1/710	10/22279	0.708515	Glyma.08G228100	1
MF	GO:0005516	calmodulin binding	8/710	194/22279	0.708515	Glyma.08G161500/Glyma.10G217000/Glyma.13G234400/Glyma.17G076200/Glyma.10G286300/Glyma.16G145500/Glyma.09G196800/Glyma.15G266300	8
MF	GO:0003777	microtubule motor activity	3/710	58/22279	0.708515	Glyma.15G256400/Glyma.03G237800/Glyma.05G149700	3
MF	GO:0003954	NADH dehydrogenase activity	3/710	58/22279	0.708515	Glyma.08G059300/Glyma.12G045300/Glyma.13G246600	3
MF	GO:0050136	NADH dehydrogenase (quinone) activity	3/710	58/22279	0.708515	Glyma.08G059300/Glyma.12G045300/Glyma.13G246600	3
MF	GO:0003955	NAD(P)H dehydrogenase (quinone) activity	3/710	59/22279	0.723419	Glyma.08G059300/Glyma.12G045300/Glyma.13G246600	3
MF	GO:0004322	ferroxidase activity	1/710	11/22279	0.723419	Glyma.11G232600	1
MF	GO:0004332	fructose-bisphosphate aldolase activity	1/710	11/22279	0.723419	Glyma.11G111400	1
MF	GO:0004372	glycine hydroxymethyltransferase activity	1/710	11/22279	0.723419	Glyma.05G152100	1
MF	GO:0004550	nucleoside diphosphate kinase activity	1/710	11/22279	0.723419	Glyma.05G045200	1
MF	GO:0004617	phosphoglycerate dehydrogenase activity	1/710	11/22279	0.723419	Glyma.10G261400	1
MF	GO:0016724	oxidoreductase activity, acting on metal ions, oxygen as acceptor	1/710	11/22279	0.723419	Glyma.11G232600	1
MF	GO:0097027	ubiquitin-protein transferase activator activity	1/710	11/22279	0.723419	Glyma.08G228100	1
MF	GO:0019203	carbohydrate phosphatase activity	2/710	35/22279	0.732134	Glyma.09G231400/Glyma.14G171700	2
MF	GO:0008194	UDP-glycosyltransferase activity	15/710	406/22279	0.732134	Glyma.08G244800/Glyma.01G074600/Glyma.09G128400/Glyma.16G175300/Glyma.18G035900/Glyma.08G017000/Glyma.08G309900/Glyma.13G276600/Glyma.19G029700/Glyma.20G094500/Glyma.10G062600/Glyma.13G065900/Glyma.12G101600/Glyma.15G234700/Glyma.06G302400	15
MF	GO:0015631	tubulin binding	10/710	260/22279	0.732134	Glyma.03G217000/Glyma.15G256400/Glyma.03G237800/Glyma.01G168200/Glyma.07G120900/Glyma.05G085400/Glyma.14G085200/Glyma.05G149700/Glyma.09G013100/Glyma.20G018500	10
MF	GO:0043175	RNA polymerase core enzyme binding	2/710	36/22279	0.732134	Glyma.01G234600/Glyma.11G008300	2
MF	GO:0016791	phosphatase activity	18/710	496/22279	0.732134	Glyma.20G170500/Glyma.19G176600/Glyma.15G023000/Glyma.07G011900/Glyma.08G008600/Glyma.09G231400/Glyma.03G221100/Glyma.04G031800/Glyma.07G107000/Glyma.11G022300/Glyma.08G241500/Glyma.09G111300/Glyma.01G225100/Glyma.08G033800/Glyma.14G018100/Glyma.14G171700/Glyma.03G166500/Glyma.19G147800	18
MF	GO:0004311	farnesyltranstransferase activity	1/710	12/22279	0.732134	Glyma.02G283400	1
MF	GO:0016722	oxidoreductase activity, acting on metal ions	1/710	12/22279	0.732134	Glyma.11G232600	1
MF	GO:0032454	histone H3-methyl-lysine-9 demethylase activity	1/710	12/22279	0.732134	Glyma.17G010600	1
MF	GO:0035250	UDP-galactosyltransferase activity	1/710	12/22279	0.732134	Glyma.20G094500	1
MF	GO:0055106	ubiquitin-protein transferase regulator activity	1/710	12/22279	0.732134	Glyma.08G228100	1
MF	GO:0015291	secondary active transmembrane transporter activity	16/710	438/22279	0.732134	Glyma.01G025200/Glyma.03G171500/Glyma.07G184800/Glyma.02G059200/Glyma.01G178500/Glyma.09G087200/Glyma.13G206700/Glyma.02G145100/Glyma.03G005600/Glyma.04G067700/Glyma.06G156600/Glyma.05G001700/Glyma.18G029000/Glyma.10G109500/Glyma.14G032400/Glyma.19G164300	16
MF	GO:0015299	solute:proton antiporter activity	3/710	63/22279	0.732134	Glyma.03G171500/Glyma.07G184800/Glyma.14G032400	3
MF	GO:0004439	phosphatidylinositol-4,5-bisphosphate 5-phosphatase activity	2/710	37/22279	0.732134	Glyma.20G170500/Glyma.07G107000	2
MF	GO:0106019	phosphatidylinositol-4,5-bisphosphate phosphatase activity	2/710	37/22279	0.732134	Glyma.20G170500/Glyma.07G107000	2
MF	GO:0008483	transaminase activity	3/710	65/22279	0.732134	Glyma.16G162400/Glyma.04G049200/Glyma.18G116900	3
MF	GO:0009678	pyrophosphate hydrolysis-driven proton transmembrane transporter activity	3/710	65/22279	0.732134	Glyma.14G134100/Glyma.03G262600/Glyma.17G061800	3
MF	GO:0016769	transferase activity, transferring nitrogenous groups	3/710	65/22279	0.732134	Glyma.16G162400/Glyma.04G049200/Glyma.18G116900	3
MF	GO:0003950	NAD+ ADP-ribosyltransferase activity	1/710	13/22279	0.732134	Glyma.05G037700	1
MF	GO:0004557	alpha-galactosidase activity	1/710	13/22279	0.732134	Glyma.03G137900	1
MF	GO:0008878	glucose-1-phosphate adenylyltransferase activity	1/710	13/22279	0.732134	Glyma.06G030400	1
MF	GO:0010997	anaphase-promoting complex binding	1/710	13/22279	0.732134	Glyma.08G228100	1
MF	GO:0015112	nitrate transmembrane transporter activity	1/710	13/22279	0.732134	Glyma.18G141900	1
MF	GO:0043138	3'-5' DNA helicase activity	1/710	13/22279	0.732134	Glyma.10G148300	1
MF	GO:0047938	glucose-6-phosphate 1-epimerase activity	1/710	13/22279	0.732134	Glyma.01G223900	1
MF	GO:0052634	C-19 gibberellin 2-beta-dioxygenase activity	1/710	13/22279	0.732134	Glyma.13G218200	1
MF	GO:0052692	raffinose alpha-galactosidase activity	1/710	13/22279	0.732134	Glyma.03G137900	1
MF	GO:0008289	lipid binding	14/710	385/22279	0.732134	Glyma.07G243600/Glyma.05G178700/Glyma.15G145600/Glyma.13G357100/Glyma.18G191800/Glyma.09G160200/Glyma.09G040500/Glyma.07G225600/Glyma.08G041800/Glyma.13G200000/Glyma.18G210900/Glyma.07G243500/Glyma.07G141500/Glyma.18G152400	14
MF	GO:0050661	NADP binding	4/710	94/22279	0.741466	Glyma.08G047800/Glyma.19G038400/Glyma.11G247600/Glyma.02G218300	4
MF	GO:0003684	damaged DNA binding	2/710	39/22279	0.741466	Glyma.14G193200/Glyma.02G226300	2
MF	GO:0070063	RNA polymerase binding	2/710	39/22279	0.741466	Glyma.01G234600/Glyma.11G008300	2
MF	GO:0008017	microtubule binding	9/710	240/22279	0.744734	Glyma.03G217000/Glyma.15G256400/Glyma.03G237800/Glyma.01G168200/Glyma.07G120900/Glyma.05G085400/Glyma.14G085200/Glyma.05G149700/Glyma.09G013100	9
MF	GO:0016655	oxidoreductase activity, acting on NAD(P)H, quinone or similar compound as acceptor	3/710	67/22279	0.7455	Glyma.08G059300/Glyma.12G045300/Glyma.13G246600	3
MF	GO:0005216	ion channel activity	7/710	182/22279	0.7455	Glyma.14G212500/Glyma.02G059200/Glyma.01G178500/Glyma.09G168600/Glyma.06G055400/Glyma.19G221000/Glyma.08G187600	7
MF	GO:0008253	5'-nucleotidase activity	1/710	14/22279	0.745901	Glyma.04G031800	1
MF	GO:0080030	methyl indole-3-acetate esterase activity	1/710	14/22279	0.745901	Glyma.01G239600	1
MF	GO:0015020	glucuronosyltransferase activity	2/710	40/22279	0.745901	Glyma.13G276600/Glyma.13G065900	2
MF	GO:0000287	magnesium ion binding	6/710	155/22279	0.749204	Glyma.06G169700/Glyma.01G118000/Glyma.10G044700/Glyma.09G153900/Glyma.04G129200/Glyma.04G144900	6
MF	GO:0004843	thiol-dependent deubiquitinase	4/710	97/22279	0.749204	Glyma.09G204600/Glyma.17G201000/Glyma.15G248200/Glyma.14G132500	4
MF	GO:0050660	flavin adenine dinucleotide binding	8/710	214/22279	0.749204	Glyma.06G169700/Glyma.02G108400/Glyma.13G253100/Glyma.11G248400/Glyma.04G074500/Glyma.15G061800/Glyma.16G019900/Glyma.09G218100	8
MF	GO:0031490	chromatin DNA binding	2/710	41/22279	0.749204	Glyma.06G086700/Glyma.17G010600	2
MF	GO:0015035	protein-disulfide reductase activity	5/710	127/22279	0.749204	Glyma.13G293700/Glyma.05G218400/Glyma.13G174100/Glyma.20G005300/Glyma.06G185200	5
MF	GO:0009055	electron transfer activity	8/710	216/22279	0.749204	Glyma.08G126800/Glyma.10G136300/Glyma.20G085900/Glyma.06G239900/Glyma.01G230900/Glyma.09G266700/Glyma.03G109900/Glyma.17G112900	8
MF	GO:0043531	ADP binding	8/710	216/22279	0.749204	Glyma.16G006400/Glyma.09G161400/Glyma.15G232400/Glyma.13G076200/Glyma.14G151100/Glyma.07G063100/Glyma.07G037000/Glyma.19G054700	8
MF	GO:0004024	alcohol dehydrogenase activity, zinc-dependent	1/710	15/22279	0.749204	Glyma.14G156400	1
MF	GO:0008047	enzyme activator activity	1/710	15/22279	0.749204	Glyma.03G068100	1
MF	GO:0017022	myosin binding	1/710	15/22279	0.749204	Glyma.09G198200	1
MF	GO:0050897	cobalt ion binding	1/710	15/22279	0.749204	Glyma.05G152100	1
MF	GO:0038023	signaling receptor activity	6/710	159/22279	0.751287	Glyma.07G243600/Glyma.15G145600/Glyma.15G262600/Glyma.03G051100/Glyma.09G040500/Glyma.07G243500	6
MF	GO:0015605	organophosphate ester transmembrane transporter activity	2/710	43/22279	0.751287	Glyma.13G206700/Glyma.03G059200	2
MF	GO:0004144	diacylglycerol O-acyltransferase activity	1/710	16/22279	0.751287	Glyma.09G239600	1
MF	GO:0004427	inorganic diphosphatase activity	1/710	16/22279	0.751287	Glyma.10G044700	1
MF	GO:0004523	RNA-DNA hybrid ribonuclease activity	1/710	16/22279	0.751287	Glyma.09G161400	1
MF	GO:0004559	alpha-mannosidase activity	1/710	16/22279	0.751287	Glyma.02G046800	1
MF	GO:0009975	cyclase activity	1/710	16/22279	0.751287	Glyma.03G147700	1
MF	GO:0046592	polyamine oxidase activity	1/710	16/22279	0.751287	Glyma.18G045100	1
MF	GO:0051903	S-(hydroxymethyl)glutathione dehydrogenase activity	1/710	16/22279	0.751287	Glyma.14G156400	1
MF	GO:0015293	symporter activity	5/710	131/22279	0.751287	Glyma.09G087200/Glyma.06G156600/Glyma.18G029000/Glyma.10G109500/Glyma.19G164300	5
MF	GO:0015036	disulfide oxidoreductase activity	5/710	132/22279	0.751287	Glyma.13G293700/Glyma.05G218400/Glyma.13G174100/Glyma.20G005300/Glyma.06G185200	5
MF	GO:0015298	solute:cation antiporter activity	3/710	73/22279	0.751287	Glyma.03G171500/Glyma.07G184800/Glyma.14G032400	3
MF	GO:0004650	polygalacturonase activity	3/710	74/22279	0.751287	Glyma.19G006200/Glyma.13G054600/Glyma.09G050900	3
MF	GO:0016776	phosphotransferase activity, phosphate group as acceptor	2/710	45/22279	0.751287	Glyma.19G141200/Glyma.05G045200	2
MF	GO:0047834	D-threo-aldose 1-dehydrogenase activity	2/710	45/22279	0.751287	Glyma.18G285800/Glyma.01G102900	2
MF	GO:1901681	sulfur compound binding	2/710	45/22279	0.751287	Glyma.06G169700/Glyma.01G118000	2
MF	GO:0004022	alcohol dehydrogenase (NAD+) activity	1/710	17/22279	0.751287	Glyma.14G156400	1
MF	GO:0008083	growth factor activity	1/710	17/22279	0.751287	Glyma.17G159000	1
MF	GO:0008199	ferric iron binding	1/710	17/22279	0.751287	Glyma.11G232600	1
MF	GO:0015179	L-amino acid transmembrane transporter activity	1/710	17/22279	0.751287	Glyma.09G050200	1
MF	GO:0016647	oxidoreductase activity, acting on the CH-NH group of donors, oxygen as acceptor	1/710	17/22279	0.751287	Glyma.18G045100	1
MF	GO:0018455	alcohol dehydrogenase [NAD(P)+] activity	1/710	17/22279	0.751287	Glyma.14G156400	1
MF	GO:0052793	pectin acetylesterase activity	1/710	17/22279	0.751287	Glyma.16G107300	1
MF	GO:0016836	hydro-lyase activity	4/710	104/22279	0.751287	Glyma.13G257200/Glyma.01G239600/Glyma.09G153900/Glyma.12G181800	4
MF	GO:0004197	cysteine-type endopeptidase activity	4/710	105/22279	0.761101	Glyma.09G204600/Glyma.17G201000/Glyma.15G248200/Glyma.14G132500	4
MF	GO:0034595	phosphatidylinositol phosphate 5-phosphatase activity	2/710	46/22279	0.762109	Glyma.20G170500/Glyma.07G107000	2
MF	GO:0017172	cysteine dioxygenase activity	1/710	18/22279	0.774127	Glyma.19G115600	1
MF	GO:0034593	phosphatidylinositol bisphosphate phosphatase activity	2/710	47/22279	0.774641	Glyma.20G170500/Glyma.07G107000	2
MF	GO:0019888	protein phosphatase regulator activity	4/710	107/22279	0.774641	Glyma.07G243600/Glyma.15G145600/Glyma.09G040500/Glyma.07G243500	4
MF	GO:0008422	beta-glucosidase activity	4/710	108/22279	0.77788	Glyma.11G095100/Glyma.12G185200/Glyma.11G095000/Glyma.09G037100	4
MF	GO:0019208	phosphatase regulator activity	4/710	108/22279	0.77788	Glyma.07G243600/Glyma.15G145600/Glyma.09G040500/Glyma.07G243500	4
MF	GO:0004529	exodeoxyribonuclease activity	1/710	19/22279	0.77788	Glyma.06G155300	1
MF	GO:0016273	arginine N-methyltransferase activity	1/710	19/22279	0.77788	Glyma.20G101000	1
MF	GO:0016274	protein-arginine N-methyltransferase activity	1/710	19/22279	0.77788	Glyma.20G101000	1
MF	GO:0016624	oxidoreductase activity, acting on the aldehyde or oxo group of donors, disulfide as acceptor	1/710	19/22279	0.77788	Glyma.06G120300	1
MF	GO:0016895	exodeoxyribonuclease activity, producing 5'-phosphomonoesters	1/710	19/22279	0.77788	Glyma.06G155300	1
MF	GO:0003779	actin binding	5/710	140/22279	0.77788	Glyma.08G161500/Glyma.17G092600/Glyma.10G286300/Glyma.14G005200/Glyma.15G266300	5
MF	GO:0004386	helicase activity	7/710	202/22279	0.77788	Glyma.09G025400/Glyma.03G262100/Glyma.19G261200/Glyma.10G148300/Glyma.14G024300/Glyma.17G104100/Glyma.01G040900	7
MF	GO:0106306	protein serine phosphatase activity	5/710	141/22279	0.77788	Glyma.19G176600/Glyma.09G111300/Glyma.01G225100/Glyma.08G033800/Glyma.19G147800	5
MF	GO:0106307	protein threonine phosphatase activity	5/710	141/22279	0.77788	Glyma.19G176600/Glyma.09G111300/Glyma.01G225100/Glyma.08G033800/Glyma.19G147800	5
MF	GO:0008276	protein methyltransferase activity	3/710	80/22279	0.77788	Glyma.20G101000/Glyma.20G229400/Glyma.10G292500	3
MF	GO:0008242	omega peptidase activity	4/710	111/22279	0.77788	Glyma.09G204600/Glyma.17G201000/Glyma.15G248200/Glyma.14G132500	4
MF	GO:0004467	long-chain fatty acid-CoA ligase activity	1/710	20/22279	0.77788	Glyma.03G221400	1
MF	GO:0004630	phospholipase D activity	1/710	20/22279	0.77788	Glyma.04G020400	1
MF	GO:0016742	hydroxymethyl-, formyl- and related transferase activity	1/710	20/22279	0.77788	Glyma.05G152100	1
MF	GO:0019905	syntaxin binding	1/710	20/22279	0.77788	Glyma.09G198200	1
MF	GO:0070290	N-acylphosphatidylethanolamine-specific phospholipase D activity	1/710	20/22279	0.77788	Glyma.04G020400	1
MF	GO:0015079	potassium ion transmembrane transporter activity	3/710	81/22279	0.778257	Glyma.14G212500/Glyma.19G221000/Glyma.08G187600	3
MF	GO:0016278	lysine N-methyltransferase activity	2/710	51/22279	0.778257	Glyma.20G229400/Glyma.10G292500	2
MF	GO:0016279	protein-lysine N-methyltransferase activity	2/710	51/22279	0.778257	Glyma.20G229400/Glyma.10G292500	2
MF	GO:0004089	carbonate dehydratase activity	1/710	21/22279	0.778257	Glyma.13G257200	1
MF	GO:0008753	NADPH dehydrogenase (quinone) activity	1/710	21/22279	0.778257	Glyma.12G045300	1
MF	GO:0019210	kinase inhibitor activity	1/710	21/22279	0.778257	Glyma.14G082300	1
MF	GO:0030545	signaling receptor regulator activity	1/710	21/22279	0.778257	Glyma.17G159000	1
MF	GO:0030546	signaling receptor activator activity	1/710	21/22279	0.778257	Glyma.17G159000	1
MF	GO:0045543	gibberellin 2-beta-dioxygenase activity	1/710	21/22279	0.778257	Glyma.13G218200	1
MF	GO:0048018	receptor ligand activity	1/710	21/22279	0.778257	Glyma.17G159000	1
MF	GO:0030247	polysaccharide binding	3/710	83/22279	0.77898	Glyma.11G036100/Glyma.18G294400/Glyma.05G217000	3
MF	GO:0015078	proton transmembrane transporter activity	7/710	210/22279	0.785399	Glyma.14G134100/Glyma.03G171500/Glyma.07G184800/Glyma.09G087200/Glyma.03G262600/Glyma.14G032400/Glyma.17G061800	7
MF	GO:0015297	antiporter activity	9/710	273/22279	0.785399	Glyma.01G025200/Glyma.03G171500/Glyma.07G184800/Glyma.13G206700/Glyma.02G145100/Glyma.03G005600/Glyma.04G067700/Glyma.05G001700/Glyma.14G032400	9
MF	GO:0003872	6-phosphofructokinase activity	1/710	22/22279	0.785399	Glyma.05G224900	1
MF	GO:0008252	nucleotidase activity	1/710	22/22279	0.785399	Glyma.04G031800	1
MF	GO:0090447	glycerol-3-phosphate 2-O-acyltransferase activity	1/710	22/22279	0.785399	Glyma.03G221100	1
MF	GO:0102682	N6-(Delta2-isopentenyl)-adenosine 5'-monophosphate phosphoribohydrolase activity	1/710	22/22279	0.785399	Glyma.06G053000	1
MF	GO:0060089	molecular transducer activity	6/710	180/22279	0.786986	Glyma.07G243600/Glyma.15G145600/Glyma.15G262600/Glyma.03G051100/Glyma.09G040500/Glyma.07G243500	6
MF	GO:0051536	iron-sulfur cluster binding	7/710	212/22279	0.786986	Glyma.14G150600/Glyma.13G078400/Glyma.08G126800/Glyma.05G042400/Glyma.08G114400/Glyma.06G155300/Glyma.07G017000	7
MF	GO:0051540	metal cluster binding	7/710	212/22279	0.786986	Glyma.14G150600/Glyma.13G078400/Glyma.08G126800/Glyma.05G042400/Glyma.08G114400/Glyma.06G155300/Glyma.07G017000	7
MF	GO:0101005	deubiquitinase activity	4/710	118/22279	0.788747	Glyma.09G204600/Glyma.17G201000/Glyma.15G248200/Glyma.14G132500	4
MF	GO:0003887	DNA-directed DNA polymerase activity	1/710	23/22279	0.788747	Glyma.06G155300	1
MF	GO:0005315	inorganic phosphate transmembrane transporter activity	1/710	23/22279	0.788747	Glyma.19G164300	1
MF	GO:0015295	solute:proton symporter activity	1/710	23/22279	0.788747	Glyma.09G087200	1
MF	GO:0046556	alpha-L-arabinofuranosidase activity	1/710	23/22279	0.788747	Glyma.19G124600	1
MF	GO:0016799	hydrolase activity, hydrolyzing N-glycosyl compounds	2/710	55/22279	0.788747	Glyma.09G018700/Glyma.06G053000	2
MF	GO:0019783	ubiquitin-like protein-specific protease activity	4/710	120/22279	0.795758	Glyma.09G204600/Glyma.17G201000/Glyma.15G248200/Glyma.14G132500	4
MF	GO:0010181	FMN binding	2/710	56/22279	0.795758	Glyma.17G049900/Glyma.12G045300	2
MF	GO:0019205	nucleobase-containing compound kinase activity	2/710	56/22279	0.795758	Glyma.19G141200/Glyma.05G045200	2
MF	GO:0019104	DNA N-glycosylase activity	1/710	24/22279	0.798988	Glyma.09G018700	1
MF	GO:0042393	histone binding	3/710	90/22279	0.802994	Glyma.04G214600/Glyma.02G157700/Glyma.06G151500	3
MF	GO:0008271	secondary active sulfate transmembrane transporter activity	1/710	25/22279	0.802994	Glyma.02G145100	1
MF	GO:0015294	solute:cation symporter activity	1/710	25/22279	0.802994	Glyma.09G087200	1
MF	GO:0015085	calcium ion transmembrane transporter activity	2/710	58/22279	0.802994	Glyma.02G059200/Glyma.01G178500	2
MF	GO:0008514	organic anion transmembrane transporter activity	3/710	91/22279	0.802994	Glyma.13G206700/Glyma.09G050200/Glyma.03G059200	3
MF	GO:0016780	phosphotransferase activity, for other substituted phosphate groups	1/710	26/22279	0.802994	Glyma.08G213100	1
MF	GO:0016861	intramolecular oxidoreductase activity, interconverting aldoses and ketoses	1/710	26/22279	0.802994	Glyma.19G017200	1
MF	GO:0061630	ubiquitin protein ligase activity	7/710	223/22279	0.802994	Glyma.18G235600/Glyma.02G267800/Glyma.10G268900/Glyma.19G180000/Glyma.09G256800/Glyma.03G179300/Glyma.14G130700	7
MF	GO:0008443	phosphofructokinase activity	1/710	27/22279	0.802994	Glyma.05G224900	1
MF	GO:0016411	acylglycerol O-acyltransferase activity	1/710	27/22279	0.802994	Glyma.09G239600	1
MF	GO:0140677	molecular function activator activity	1/710	27/22279	0.802994	Glyma.03G068100	1
MF	GO:0005244	voltage-gated ion channel activity	2/710	61/22279	0.802994	Glyma.14G212500/Glyma.08G187600	2
MF	GO:0022832	voltage-gated channel activity	2/710	61/22279	0.802994	Glyma.14G212500/Glyma.08G187600	2
MF	GO:0016667	oxidoreductase activity, acting on a sulfur group of donors	5/710	161/22279	0.802994	Glyma.13G293700/Glyma.05G218400/Glyma.13G174100/Glyma.20G005300/Glyma.06G185200	5
MF	GO:0004888	transmembrane signaling receptor activity	2/710	62/22279	0.802994	Glyma.15G262600/Glyma.03G051100	2
MF	GO:0061659	ubiquitin-like protein ligase activity	7/710	228/22279	0.802994	Glyma.18G235600/Glyma.02G267800/Glyma.10G268900/Glyma.19G180000/Glyma.09G256800/Glyma.03G179300/Glyma.14G130700	7
MF	GO:0016627	oxidoreductase activity, acting on the CH-CH group of donors	3/710	96/22279	0.802994	Glyma.17G049900/Glyma.08G062000/Glyma.11G070500	3
MF	GO:0005496	steroid binding	1/710	28/22279	0.802994	Glyma.07G225600	1
MF	GO:0032452	histone demethylase activity	1/710	28/22279	0.802994	Glyma.17G010600	1
MF	GO:0032934	sterol binding	1/710	28/22279	0.802994	Glyma.07G225600	1
MF	GO:0034061	DNA polymerase activity	1/710	28/22279	0.802994	Glyma.06G155300	1
MF	GO:0050145	nucleoside monophosphate kinase activity	1/710	28/22279	0.802994	Glyma.19G141200	1
MF	GO:0102336	3-oxo-arachidoyl-CoA synthase activity	1/710	28/22279	0.802994	Glyma.20G210900	1
MF	GO:0102337	3-oxo-cerotoyl-CoA synthase activity	1/710	28/22279	0.802994	Glyma.20G210900	1
MF	GO:0102338	3-oxo-lignoceronyl-CoA synthase activity	1/710	28/22279	0.802994	Glyma.20G210900	1
MF	GO:0102756	very-long-chain 3-ketoacyl-CoA synthase activity	1/710	28/22279	0.802994	Glyma.20G210900	1
MF	GO:0140457	protein demethylase activity	1/710	28/22279	0.802994	Glyma.17G010600	1
MF	GO:0004722	protein serine/threonine phosphatase activity	5/710	163/22279	0.802994	Glyma.19G176600/Glyma.09G111300/Glyma.01G225100/Glyma.08G033800/Glyma.19G147800	5
MF	GO:0046527	glucosyltransferase activity	6/710	196/22279	0.802994	Glyma.11G253900/Glyma.02G068900/Glyma.01G196800/Glyma.09G062600/Glyma.20G141800/Glyma.15G234700	6
MF	GO:0052689	carboxylic ester hydrolase activity	7/710	229/22279	0.802994	Glyma.17G244200/Glyma.14G081500/Glyma.14G081200/Glyma.01G239600/Glyma.14G081300/Glyma.15G184400/Glyma.16G107300	7
MF	GO:0016796	exonuclease activity, active with either ribo- or deoxyribonucleic acids and producing 5'-phosphomonoesters	2/710	63/22279	0.802994	Glyma.06G155300/Glyma.19G005800	2
MF	GO:0008170	N-methyltransferase activity	3/710	97/22279	0.802994	Glyma.20G101000/Glyma.20G229400/Glyma.10G292500	3
MF	GO:0016407	acetyltransferase activity	6/710	197/22279	0.802994	Glyma.01G034900/Glyma.11G150900/Glyma.13G291700/Glyma.01G034300/Glyma.12G233500/Glyma.07G205200	6
MF	GO:0004721	phosphoprotein phosphatase activity	7/710	230/22279	0.802994	Glyma.19G176600/Glyma.08G008600/Glyma.08G241500/Glyma.09G111300/Glyma.01G225100/Glyma.08G033800/Glyma.19G147800	7
MF	GO:0019829	ATPase-coupled cation transmembrane transporter activity	3/710	98/22279	0.802994	Glyma.14G134100/Glyma.03G262600/Glyma.17G061800	3
MF	GO:0005347	ATP transmembrane transporter activity	1/710	29/22279	0.802994	Glyma.03G059200	1
MF	GO:0008810	cellulase activity	1/710	29/22279	0.802994	Glyma.04G111300	1
MF	GO:0015116	sulfate transmembrane transporter activity	1/710	29/22279	0.802994	Glyma.02G145100	1
MF	GO:0005484	SNAP receptor activity	2/710	64/22279	0.802994	Glyma.20G158000/Glyma.10G082500	2
MF	GO:0016879	ligase activity, forming carbon-nitrogen bonds	3/710	101/22279	0.825919	Glyma.17G165300/Glyma.18G061100/Glyma.11G170300	3
MF	GO:0044877	protein-containing complex binding	8/710	270/22279	0.825919	Glyma.08G161500/Glyma.17G092600/Glyma.17G226700/Glyma.14G098000/Glyma.10G286300/Glyma.08G228100/Glyma.14G005200/Glyma.15G266300	8
MF	GO:0008138	protein tyrosine/serine/threonine phosphatase activity	1/710	31/22279	0.825919	Glyma.08G008600	1
MF	GO:0016638	oxidoreductase activity, acting on the CH-NH2 group of donors	1/710	31/22279	0.825919	Glyma.06G052100	1
MF	GO:0001216	DNA-binding transcription activator activity	1/710	32/22279	0.831977	Glyma.15G261300	1
MF	GO:0001228	DNA-binding transcription activator activity, RNA polymerase II-specific	1/710	32/22279	0.831977	Glyma.15G261300	1
MF	GO:0019187	beta-1,4-mannosyltransferase activity	1/710	32/22279	0.831977	Glyma.19G190600	1
MF	GO:0051753	mannan synthase activity	1/710	32/22279	0.831977	Glyma.19G190600	1
MF	GO:0071949	FAD binding	3/710	105/22279	0.835179	Glyma.11G248400/Glyma.04G074500/Glyma.16G019900	3
MF	GO:0000295	adenine nucleotide transmembrane transporter activity	1/710	33/22279	0.835179	Glyma.03G059200	1
MF	GO:0005346	purine ribonucleotide transmembrane transporter activity	1/710	33/22279	0.835179	Glyma.03G059200	1
MF	GO:0015216	purine nucleotide transmembrane transporter activity	1/710	33/22279	0.835179	Glyma.03G059200	1
MF	GO:0032451	demethylase activity	1/710	33/22279	0.835179	Glyma.17G010600	1
MF	GO:0022853	active ion transmembrane transporter activity	8/710	278/22279	0.840072	Glyma.14G134100/Glyma.03G171500/Glyma.07G184800/Glyma.09G087200/Glyma.02G145100/Glyma.03G262600/Glyma.14G032400/Glyma.17G061800	8
MF	GO:0022836	gated channel activity	3/710	107/22279	0.840072	Glyma.14G212500/Glyma.06G055400/Glyma.08G187600	3
MF	GO:0016840	carbon-nitrogen lyase activity	1/710	34/22279	0.840072	Glyma.02G309300	1
MF	GO:0018024	histone-lysine N-methyltransferase activity	1/710	34/22279	0.840072	Glyma.20G229400	1
MF	GO:0008408	3'-5' exonuclease activity	2/710	72/22279	0.844633	Glyma.06G155300/Glyma.19G005800	2
MF	GO:0004866	endopeptidase inhibitor activity	2/710	74/22279	0.85834	Glyma.15G211500/Glyma.08G342100	2
MF	GO:0030414	peptidase inhibitor activity	2/710	74/22279	0.85834	Glyma.15G211500/Glyma.08G342100	2
MF	GO:0140097	catalytic activity, acting on DNA	6/710	218/22279	0.867292	Glyma.01G175300/Glyma.09G018700/Glyma.10G148300/Glyma.04G074500/Glyma.06G155300/Glyma.11G029500	6
MF	GO:0047262	polygalacturonate 4-alpha-galacturonosyltransferase activity	1/710	37/22279	0.867292	Glyma.08G309900	1
MF	GO:0061135	endopeptidase regulator activity	2/710	76/22279	0.868296	Glyma.15G211500/Glyma.08G342100	2
MF	GO:0004536	deoxyribonuclease activity	1/710	38/22279	0.868296	Glyma.06G155300	1
MF	GO:0080043	quercetin 3-O-glucosyltransferase activity	1/710	38/22279	0.868296	Glyma.15G234700	1
MF	GO:0080044	quercetin 7-O-glucosyltransferase activity	1/710	38/22279	0.868296	Glyma.15G234700	1
MF	GO:0003755	peptidyl-prolyl cis-trans isomerase activity	2/710	77/22279	0.868296	Glyma.05G149900/Glyma.03G086200	2
MF	GO:0016706	2-oxoglutarate-dependent dioxygenase activity	2/710	78/22279	0.870243	Glyma.13G218200/Glyma.13G082300	2
MF	GO:0061134	peptidase regulator activity	2/710	78/22279	0.870243	Glyma.15G211500/Glyma.08G342100	2
MF	GO:0000175	3'-5'-exoribonuclease activity	1/710	39/22279	0.870243	Glyma.19G005800	1
MF	GO:0015215	nucleotide transmembrane transporter activity	1/710	39/22279	0.870243	Glyma.03G059200	1
MF	GO:0042054	histone methyltransferase activity	1/710	40/22279	0.878926	Glyma.20G229400	1
MF	GO:0016859	cis-trans isomerase activity	2/710	81/22279	0.88496	Glyma.05G149900/Glyma.03G086200	2
MF	GO:0016881	acid-amino acid ligase activity	1/710	41/22279	0.88496	Glyma.17G165300	1
MF	GO:0004725	protein tyrosine phosphatase activity	1/710	42/22279	0.89286	Glyma.08G241500	1
MF	GO:0004222	metalloendopeptidase activity	2/710	83/22279	0.894222	Glyma.02G215700/Glyma.02G028200	2
MF	GO:0005319	lipid transporter activity	2/710	84/22279	0.899044	Glyma.04G129200/Glyma.04G144900	2
MF	GO:0015301	anion:anion antiporter activity	1/710	44/22279	0.900762	Glyma.02G145100	1
MF	GO:0016857	racemase and epimerase activity, acting on carbohydrates and derivatives	1/710	44/22279	0.900762	Glyma.01G223900	1
MF	GO:0140323	solute:anion antiporter activity	1/710	44/22279	0.900762	Glyma.02G145100	1
MF	GO:0015171	amino acid transmembrane transporter activity	1/710	45/22279	0.907578	Glyma.09G050200	1
MF	GO:0004532	exoribonuclease activity	1/710	46/22279	0.909536	Glyma.19G005800	1
MF	GO:0016896	exoribonuclease activity, producing 5'-phosphomonoesters	1/710	46/22279	0.909536	Glyma.19G005800	1
MF	GO:0048029	monosaccharide binding	1/710	46/22279	0.909536	Glyma.19G017200	1
MF	GO:0003713	transcription coactivator activity	1/710	47/22279	0.915699	Glyma.06G086700	1
MF	GO:0000030	mannosyltransferase activity	1/710	48/22279	0.921565	Glyma.19G190600	1
MF	GO:0004659	prenyltransferase activity	1/710	49/22279	0.927143	Glyma.02G283400	1
MF	GO:0003993	acid phosphatase activity	1/710	50/22279	0.927884	Glyma.03G166500	1
MF	GO:0004675	transmembrane receptor protein serine/threonine kinase activity	1/710	50/22279	0.927884	Glyma.03G051100	1
MF	GO:1901682	sulfur compound transmembrane transporter activity	1/710	50/22279	0.927884	Glyma.02G145100	1
MF	GO:0051539	4 iron, 4 sulfur cluster binding	3/710	135/22279	0.930635	Glyma.05G042400/Glyma.06G155300/Glyma.07G017000	3
MF	GO:0019199	transmembrane receptor protein kinase activity	1/710	51/22279	0.930635	Glyma.03G051100	1
MF	GO:0003678	DNA helicase activity	1/710	52/22279	0.935393	Glyma.10G148300	1
MF	GO:0022890	inorganic cation transmembrane transporter activity	12/710	469/22279	0.936214	Glyma.14G134100/Glyma.03G171500/Glyma.14G212500/Glyma.07G184800/Glyma.02G059200/Glyma.01G178500/Glyma.09G087200/Glyma.19G221000/Glyma.03G262600/Glyma.14G032400/Glyma.08G187600/Glyma.17G061800	12
MF	GO:0030674	protein-macromolecule adaptor activity	2/710	97/22279	0.936214	Glyma.20G158000/Glyma.10G082500	2
MF	GO:0019200	carbohydrate kinase activity	1/710	55/22279	0.941222	Glyma.05G224900	1
MF	GO:0004527	exonuclease activity	2/710	100/22279	0.941222	Glyma.06G155300/Glyma.19G005800	2
MF	GO:1901505	carbohydrate derivative transmembrane transporter activity	2/710	100/22279	0.941222	Glyma.13G206700/Glyma.03G059200	2
MF	GO:0016874	ligase activity	7/710	295/22279	0.941222	Glyma.17G165300/Glyma.08G204300/Glyma.17G064400/Glyma.18G061100/Glyma.11G170300/Glyma.03G221400/Glyma.09G138100	7
MF	GO:0008509	anion transmembrane transporter activity	5/710	220/22279	0.941222	Glyma.18G141900/Glyma.13G206700/Glyma.02G145100/Glyma.09G050200/Glyma.03G059200	5
MF	GO:0019899	enzyme binding	8/710	336/22279	0.949474	Glyma.12G140200/Glyma.01G234600/Glyma.15G064900/Glyma.06G258200/Glyma.07G225600/Glyma.03G054900/Glyma.11G008300/Glyma.20G018500	8
MF	GO:0008094	ATP-dependent activity, acting on DNA	2/710	105/22279	0.949474	Glyma.01G175300/Glyma.10G148300	2
MF	GO:0060090	molecular adaptor activity	2/710	105/22279	0.949474	Glyma.20G158000/Glyma.10G082500	2
MF	GO:0016645	oxidoreductase activity, acting on the CH-NH group of donors	1/710	59/22279	0.949474	Glyma.18G045100	1
MF	GO:0016854	racemase and epimerase activity	1/710	59/22279	0.949474	Glyma.01G223900	1
MF	GO:0004683	calmodulin-dependent protein kinase activity	1/710	60/22279	0.949474	Glyma.10G217000	1
MF	GO:0009931	calcium-dependent protein serine/threonine kinase activity	1/710	60/22279	0.949474	Glyma.10G217000	1
MF	GO:0010857	calcium-dependent protein kinase activity	1/710	60/22279	0.949474	Glyma.10G217000	1
MF	GO:0005342	organic acid transmembrane transporter activity	1/710	62/22279	0.953477	Glyma.09G050200	1
MF	GO:0046943	carboxylic acid transmembrane transporter activity	1/710	62/22279	0.953477	Glyma.09G050200	1
MF	GO:0004842	ubiquitin-protein transferase activity	12/710	496/22279	0.953477	Glyma.08G170400/Glyma.18G235600/Glyma.13G206800/Glyma.02G267800/Glyma.06G044100/Glyma.10G268900/Glyma.19G180000/Glyma.10G194500/Glyma.09G256800/Glyma.03G179300/Glyma.14G130700/Glyma.02G137300	12
MF	GO:0043130	ubiquitin binding	1/710	63/22279	0.953477	Glyma.15G051700	1
MF	GO:0000149	SNARE binding	2/710	111/22279	0.953477	Glyma.10G082500/Glyma.09G198200	2
MF	GO:0015103	inorganic anion transmembrane transporter activity	2/710	111/22279	0.953477	Glyma.18G141900/Glyma.02G145100	2
MF	GO:0004252	serine-type endopeptidase activity	3/710	155/22279	0.953819	Glyma.13G100100/Glyma.08G109000/Glyma.05G152200	3
MF	GO:0016779	nucleotidyltransferase activity	4/710	199/22279	0.958957	Glyma.17G150300/Glyma.06G155300/Glyma.19G005800/Glyma.06G030400	4
MF	GO:0003712	transcription coregulator activity	4/710	202/22279	0.964219	Glyma.04G214600/Glyma.06G086700/Glyma.17G010600/Glyma.06G151500	4
MF	GO:0051087	chaperone binding	1/710	69/22279	0.966213	Glyma.18G127500	1
MF	GO:0008081	phosphoric diester hydrolase activity	1/710	70/22279	0.966213	Glyma.04G020400	1
MF	GO:0032182	ubiquitin-like protein binding	1/710	70/22279	0.966213	Glyma.15G051700	1
MF	GO:0004190	aspartic-type endopeptidase activity	2/710	125/22279	0.973429	Glyma.16G122700/Glyma.14G212700	2
MF	GO:0070001	aspartic-type peptidase activity	2/710	125/22279	0.973429	Glyma.16G122700/Glyma.14G212700	2
MF	GO:0046873	metal ion transmembrane transporter activity	5/710	257/22279	0.973429	Glyma.14G212500/Glyma.02G059200/Glyma.01G178500/Glyma.19G221000/Glyma.08G187600	5
MF	GO:0008234	cysteine-type peptidase activity	4/710	217/22279	0.973429	Glyma.09G204600/Glyma.17G201000/Glyma.15G248200/Glyma.14G132500	4
MF	GO:0003682	chromatin binding	3/710	175/22279	0.973429	Glyma.06G086700/Glyma.17G010600/Glyma.02G157700	3
MF	GO:0016763	pentosyltransferase activity	1/710	79/22279	0.973429	Glyma.05G037700	1
MF	GO:0030276	clathrin binding	1/710	79/22279	0.973429	Glyma.04G033500	1
MF	GO:0140098	catalytic activity, acting on RNA	11/710	498/22279	0.973429	Glyma.09G161400/Glyma.09G025400/Glyma.03G262100/Glyma.19G261200/Glyma.09G040500/Glyma.16G111800/Glyma.17G104100/Glyma.19G005800/Glyma.01G040900/Glyma.03G247500/Glyma.02G218300	11
MF	GO:0003724	RNA helicase activity	1/710	80/22279	0.973429	Glyma.01G040900	1
MF	GO:0008186	ATP-dependent activity, acting on RNA	1/710	80/22279	0.973429	Glyma.01G040900	1
MF	GO:0003697	single-stranded DNA binding	1/710	81/22279	0.973429	Glyma.19G249500	1
MF	GO:0005543	phospholipid binding	2/710	133/22279	0.973429	Glyma.05G178700/Glyma.13G200000	2
MF	GO:0004857	enzyme inhibitor activity	2/710	139/22279	0.980172	Glyma.15G184400/Glyma.06G319300	2
MF	GO:0140678	molecular function inhibitor activity	2/710	139/22279	0.980172	Glyma.15G184400/Glyma.06G319300	2
MF	GO:0046910	pectinesterase inhibitor activity	1/710	88/22279	0.981932	Glyma.15G184400	1
MF	GO:0008237	metallopeptidase activity	2/710	146/22279	0.986748	Glyma.02G215700/Glyma.02G028200	2
MF	GO:0045330	aspartyl esterase activity	1/710	97/22279	0.992763	Glyma.15G184400	1
MF	GO:0003924	GTPase activity	5/710	295/22279	0.994018	Glyma.17G226700/Glyma.14G098000/Glyma.07G120900/Glyma.06G154000/Glyma.09G102100	5
MF	GO:0015932	nucleobase-containing compound transmembrane transporter activity	1/710	102/22279	0.995082	Glyma.03G059200	1
MF	GO:0030599	pectinesterase activity	1/710	112/22279	0.999995	Glyma.15G184400	1
MF	GO:0019207	kinase regulator activity	1/710	124/22279	0.999995	Glyma.14G082300	1
MF	GO:0005096	GTPase activator activity	1/710	125/22279	0.999995	Glyma.09G198200	1
MF	GO:0046982	protein heterodimerization activity	1/710	133/22279	0.999995	Glyma.15G261300	1
MF	GO:0035251	UDP-glucosyltransferase activity	1/710	137/22279	0.999995	Glyma.15G234700	1
MF	GO:0019843	rRNA binding	1/710	140/22279	0.999995	Glyma.12G009600	1
MF	GO:0019001	guanyl nucleotide binding	6/710	411/22279	0.999995	Glyma.09G038200/Glyma.17G226700/Glyma.14G098000/Glyma.07G120900/Glyma.06G154000/Glyma.09G102100	6
MF	GO:0030695	GTPase regulator activity	1/710	146/22279	0.999995	Glyma.09G198200	1
MF	GO:0060589	nucleoside-triphosphatase regulator activity	1/710	146/22279	0.999995	Glyma.09G198200	1
MF	GO:0140101	catalytic activity, acting on a tRNA	1/710	167/22279	0.999995	Glyma.02G218300	1
MF	GO:0003729	mRNA binding	4/710	345/22279	0.999995	Glyma.01G153100/Glyma.14G080600/Glyma.07G020300/Glyma.02G152000	4
MF	GO:0005525	GTP binding	5/710	400/22279	0.999995	Glyma.09G038200/Glyma.17G226700/Glyma.07G120900/Glyma.06G154000/Glyma.09G102100	5
MF	GO:0032561	guanyl ribonucleotide binding	5/710	400/22279	0.999995	Glyma.09G038200/Glyma.17G226700/Glyma.07G120900/Glyma.06G154000/Glyma.09G102100	5
MF	GO:0000981	DNA-binding transcription factor activity, RNA polymerase II-specific	5/710	444/22279	0.999995	Glyma.13G357100/Glyma.15G261300/Glyma.17G096700/Glyma.17G090500/Glyma.03G081700	5
MF	GO:0000977	RNA polymerase II transcription regulatory region sequence-specific DNA binding	1/710	375/22279	0.999995	Glyma.17G090500	1

## Sheet: Only JY93E_JY93 DOWN
GO enrichment analysis of the down-regulated DEGs between two JY93E and JY93
ONTOLOGY	ID	Description	GeneRatio	BgRatio	p.adjust	geneID	Count
BP	GO:0006749	glutathione metabolic process	5/178	100/16967	0.600788	Glyma.02G283900/Glyma.07G140400/Glyma.15G251900/Glyma.10G072700/Glyma.18G190300	5
BP	GO:0006575	cellular modified amino acid metabolic process	6/178	154/16967	0.600788	Glyma.02G283900/Glyma.07G068300/Glyma.07G140400/Glyma.15G251900/Glyma.10G072700/Glyma.18G190300	6
BP	GO:0006538	glutamate catabolic process	2/178	14/16967	0.600788	Glyma.16G218500/Glyma.02G241400	2
BP	GO:0006995	cellular response to nitrogen starvation	2/178	14/16967	0.600788	Glyma.17G013000/Glyma.06G306300	2
BP	GO:0046112	nucleobase biosynthetic process	3/178	42/16967	0.600788	Glyma.05G188500/Glyma.17G212100/Glyma.05G131400	3
BP	GO:0006207	'de novo' pyrimidine nucleobase biosynthetic process	2/178	15/16967	0.600788	Glyma.05G188500/Glyma.05G131400	2
BP	GO:0043649	dicarboxylic acid catabolic process	2/178	15/16967	0.600788	Glyma.16G218500/Glyma.02G241400	2
BP	GO:0043562	cellular response to nitrogen levels	2/178	16/16967	0.600788	Glyma.17G013000/Glyma.06G306300	2
BP	GO:0051301	cell division	7/178	239/16967	0.600788	Glyma.18G102000/Glyma.18G220100/Glyma.05G197900/Glyma.02G212400/Glyma.01G232500/Glyma.08G217800/Glyma.12G192100	7
BP	GO:0006790	sulfur compound metabolic process	9/178	359/16967	0.600788	Glyma.02G283900/Glyma.12G183400/Glyma.18G065700/Glyma.12G141400/Glyma.07G140400/Glyma.15G140200/Glyma.15G251900/Glyma.10G072700/Glyma.18G190300	9
BP	GO:0044282	small molecule catabolic process	7/178	249/16967	0.600788	Glyma.02G274100/Glyma.16G218500/Glyma.20G126800/Glyma.04G083100/Glyma.10G124700/Glyma.02G241400/Glyma.18G134600	7
BP	GO:0009308	amine metabolic process	5/178	143/16967	0.600788	Glyma.18G137100/Glyma.20G126800/Glyma.02G240000/Glyma.02G120600/Glyma.14G218100	5
BP	GO:0072527	pyrimidine-containing compound metabolic process	4/178	95/16967	0.600788	Glyma.05G188500/Glyma.18G065700/Glyma.05G131400/Glyma.05G023900	4
BP	GO:0009310	amine catabolic process	2/178	20/16967	0.600788	Glyma.20G126800/Glyma.02G240000	2
BP	GO:0042402	cellular biogenic amine catabolic process	2/178	20/16967	0.600788	Glyma.20G126800/Glyma.02G240000	2
BP	GO:0046395	carboxylic acid catabolic process	5/178	148/16967	0.600788	Glyma.16G218500/Glyma.20G126800/Glyma.10G124700/Glyma.02G241400/Glyma.18G134600	5
BP	GO:0031668	cellular response to extracellular stimulus	3/178	58/16967	0.600788	Glyma.17G013000/Glyma.06G306300/Glyma.05G023900	3
BP	GO:0071496	cellular response to external stimulus	3/178	58/16967	0.600788	Glyma.17G013000/Glyma.06G306300/Glyma.05G023900	3
BP	GO:0009112	nucleobase metabolic process	3/178	60/16967	0.600788	Glyma.05G188500/Glyma.17G212100/Glyma.05G131400	3
BP	GO:0046942	carboxylic acid transport	3/178	61/16967	0.600788	Glyma.19G087200/Glyma.08G129600/Glyma.20G101400	3
BP	GO:0055076	transition metal ion homeostasis	3/178	61/16967	0.600788	Glyma.20G166100/Glyma.02G308600/Glyma.01G106700	3
BP	GO:0006081	cellular aldehyde metabolic process	3/178	62/16967	0.600788	Glyma.02G274100/Glyma.04G083100/Glyma.14G152100	3
BP	GO:0016054	organic acid catabolic process	5/178	161/16967	0.600788	Glyma.16G218500/Glyma.20G126800/Glyma.10G124700/Glyma.02G241400/Glyma.18G134600	5
BP	GO:0009065	glutamine family amino acid catabolic process	2/178	25/16967	0.600788	Glyma.16G218500/Glyma.02G241400	2
BP	GO:0019856	pyrimidine nucleobase biosynthetic process	2/178	25/16967	0.600788	Glyma.05G188500/Glyma.05G131400	2
BP	GO:0046185	aldehyde catabolic process	2/178	25/16967	0.600788	Glyma.02G274100/Glyma.04G083100	2
BP	GO:0009064	glutamine family amino acid metabolic process	4/178	112/16967	0.600788	Glyma.05G188500/Glyma.16G218500/Glyma.02G241400/Glyma.18G041100	4
BP	GO:0009991	response to extracellular stimulus	3/178	66/16967	0.600788	Glyma.17G013000/Glyma.06G306300/Glyma.05G023900	3
BP	GO:0006829	zinc ion transport	2/178	27/16967	0.600788	Glyma.07G049200/Glyma.11G169300	2
BP	GO:0071577	zinc ion transmembrane transport	2/178	27/16967	0.600788	Glyma.07G049200/Glyma.11G169300	2
BP	GO:0006536	glutamate metabolic process	2/178	29/16967	0.600788	Glyma.16G218500/Glyma.02G241400	2
BP	GO:0042886	amide transport	2/178	30/16967	0.600788	Glyma.06G124000/Glyma.17G139400	2
BP	GO:0009738	abscisic acid-activated signaling pathway	3/178	72/16967	0.600788	Glyma.01G124700/Glyma.07G056900/Glyma.14G145400	3
BP	GO:0071215	cellular response to abscisic acid stimulus	3/178	72/16967	0.600788	Glyma.01G124700/Glyma.07G056900/Glyma.14G145400	3
BP	GO:0097306	cellular response to alcohol	3/178	72/16967	0.600788	Glyma.01G124700/Glyma.07G056900/Glyma.14G145400	3
BP	GO:1901606	alpha-amino acid catabolic process	3/178	73/16967	0.600788	Glyma.16G218500/Glyma.20G126800/Glyma.02G241400	3
BP	GO:0072528	pyrimidine-containing compound biosynthetic process	3/178	74/16967	0.600788	Glyma.05G188500/Glyma.18G065700/Glyma.05G131400	3
BP	GO:0006576	cellular biogenic amine metabolic process	3/178	75/16967	0.600788	Glyma.18G137100/Glyma.20G126800/Glyma.02G240000	3
BP	GO:0044106	cellular amine metabolic process	3/178	76/16967	0.600788	Glyma.18G137100/Glyma.20G126800/Glyma.02G240000	3
BP	GO:0046165	alcohol biosynthetic process	3/178	78/16967	0.600788	Glyma.18G065700/Glyma.11G151700/Glyma.18G255000	3
BP	GO:0006206	pyrimidine nucleobase metabolic process	2/178	34/16967	0.600788	Glyma.05G188500/Glyma.05G131400	2
BP	GO:0006835	dicarboxylic acid transport	2/178	34/16967	0.600788	Glyma.08G129600/Glyma.20G101400	2
BP	GO:0006098	pentose-phosphate shunt	2/178	36/16967	0.600788	Glyma.15G136200/Glyma.07G013800	2
BP	GO:0015711	organic anion transport	3/178	82/16967	0.600788	Glyma.19G087200/Glyma.08G129600/Glyma.20G101400	3
BP	GO:0006740	NADPH regeneration	2/178	37/16967	0.600788	Glyma.15G136200/Glyma.07G013800	2
BP	GO:0080134	regulation of response to stress	3/178	87/16967	0.600788	Glyma.15G118400/Glyma.14G011300/Glyma.02G308600	3
BP	GO:0009833	plant-type primary cell wall biogenesis	2/178	40/16967	0.600788	Glyma.01G232500/Glyma.12G192100	2
BP	GO:0000281	mitotic cytokinesis	2/178	43/16967	0.600788	Glyma.01G232500/Glyma.12G192100	2
BP	GO:0061640	cytoskeleton-dependent cytokinesis	2/178	43/16967	0.600788	Glyma.01G232500/Glyma.12G192100	2
BP	GO:0019439	aromatic compound catabolic process	6/178	281/16967	0.600788	Glyma.20G126800/Glyma.12G010600/Glyma.15G068600/Glyma.10G124700/Glyma.14G021600/Glyma.05G023900	6
BP	GO:0006595	polyamine metabolic process	2/178	44/16967	0.600788	Glyma.18G137100/Glyma.02G240000	2
BP	GO:0046916	cellular transition metal ion homeostasis	2/178	45/16967	0.600788	Glyma.20G166100/Glyma.01G106700	2
BP	GO:0000041	transition metal ion transport	2/178	46/16967	0.600788	Glyma.07G049200/Glyma.11G169300	2
BP	GO:0009084	glutamine family amino acid biosynthetic process	2/178	46/16967	0.600788	Glyma.05G188500/Glyma.18G041100	2
BP	GO:0042537	benzene-containing compound metabolic process	2/178	46/16967	0.600788	Glyma.20G126800/Glyma.10G124700	2
BP	GO:0009605	response to external stimulus	7/178	359/16967	0.600788	Glyma.17G013000/Glyma.18G220100/Glyma.15G118400/Glyma.06G306300/Glyma.06G035400/Glyma.05G015000/Glyma.05G023900	7
BP	GO:1901361	organic cyclic compound catabolic process	6/178	291/16967	0.600788	Glyma.20G126800/Glyma.12G010600/Glyma.15G068600/Glyma.10G124700/Glyma.14G021600/Glyma.05G023900	6
BP	GO:0009636	response to toxic substance	2/178	47/16967	0.600788	Glyma.02G283900/Glyma.02G274100	2
BP	GO:0043086	negative regulation of catalytic activity	2/178	47/16967	0.600788	Glyma.06G152400/Glyma.01G211300	2
BP	GO:0044092	negative regulation of molecular function	2/178	47/16967	0.600788	Glyma.06G152400/Glyma.01G211300	2
BP	GO:0055072	iron ion homeostasis	2/178	47/16967	0.600788	Glyma.20G166100/Glyma.02G308600	2
BP	GO:0072329	monocarboxylic acid catabolic process	2/178	47/16967	0.600788	Glyma.10G124700/Glyma.18G134600	2
BP	GO:0009063	cellular amino acid catabolic process	3/178	101/16967	0.600788	Glyma.16G218500/Glyma.20G126800/Glyma.02G241400	3
BP	GO:0046700	heterocycle catabolic process	5/178	233/16967	0.600788	Glyma.20G126800/Glyma.12G010600/Glyma.15G068600/Glyma.14G021600/Glyma.05G023900	5
BP	GO:0006541	glutamine metabolic process	2/178	51/16967	0.600788	Glyma.05G188500/Glyma.18G041100	2
BP	GO:0006739	NADP metabolic process	2/178	51/16967	0.600788	Glyma.15G136200/Glyma.07G013800	2
BP	GO:0009267	cellular response to starvation	2/178	51/16967	0.600788	Glyma.17G013000/Glyma.06G306300	2
BP	GO:0051156	glucose 6-phosphate metabolic process	2/178	51/16967	0.600788	Glyma.15G136200/Glyma.07G013800	2
BP	GO:0006787	porphyrin-containing compound catabolic process	1/178	10/16967	0.600788	Glyma.12G010600	1
BP	GO:0006848	pyruvate transport	1/178	10/16967	0.600788	Glyma.19G087200	1
BP	GO:0006850	mitochondrial pyruvate transmembrane transport	1/178	10/16967	0.600788	Glyma.19G087200	1
BP	GO:0033015	tetrapyrrole catabolic process	1/178	10/16967	0.600788	Glyma.12G010600	1
BP	GO:0051014	actin filament severing	1/178	10/16967	0.600788	Glyma.17G061200	1
BP	GO:1900150	regulation of defense response to fungus	1/178	10/16967	0.600788	Glyma.15G118400	1
BP	GO:1901475	pyruvate transmembrane transport	1/178	10/16967	0.600788	Glyma.19G087200	1
BP	GO:0044270	cellular nitrogen compound catabolic process	5/178	235/16967	0.600788	Glyma.20G126800/Glyma.12G010600/Glyma.15G068600/Glyma.14G021600/Glyma.05G023900	5
BP	GO:0031669	cellular response to nutrient levels	2/178	53/16967	0.600788	Glyma.17G013000/Glyma.06G306300	2
BP	GO:0051651	maintenance of location in cell	2/178	53/16967	0.600788	Glyma.18G220100/Glyma.20G166100	2
BP	GO:0043648	dicarboxylic acid metabolic process	3/178	110/16967	0.600788	Glyma.16G218500/Glyma.07G068300/Glyma.02G241400	3
BP	GO:0006168	adenine salvage	1/178	11/16967	0.600788	Glyma.17G212100	1
BP	GO:0006308	DNA catabolic process	1/178	11/16967	0.600788	Glyma.15G068600	1
BP	GO:0006491	N-glycan processing	1/178	11/16967	0.600788	Glyma.17G058500	1
BP	GO:0009052	pentose-phosphate shunt, non-oxidative branch	1/178	11/16967	0.600788	Glyma.15G136200	1
BP	GO:0009143	nucleoside triphosphate catabolic process	1/178	11/16967	0.600788	Glyma.05G023900	1
BP	GO:0009200	deoxyribonucleoside triphosphate metabolic process	1/178	11/16967	0.600788	Glyma.05G023900	1
BP	GO:0009204	deoxyribonucleoside triphosphate catabolic process	1/178	11/16967	0.600788	Glyma.05G023900	1
BP	GO:0009219	pyrimidine deoxyribonucleotide metabolic process	1/178	11/16967	0.600788	Glyma.05G023900	1
BP	GO:0019253	reductive pentose-phosphate cycle	1/178	11/16967	0.600788	Glyma.10G012900	1
BP	GO:0019685	photosynthesis, dark reaction	1/178	11/16967	0.600788	Glyma.10G012900	1
BP	GO:0043096	purine nucleobase salvage	1/178	11/16967	0.600788	Glyma.17G212100	1
BP	GO:1901700	response to oxygen-containing compound	7/178	385/16967	0.600788	Glyma.02G274100/Glyma.01G124700/Glyma.13G205800/Glyma.17G139400/Glyma.02G308600/Glyma.07G056900/Glyma.14G145400	7
BP	GO:0055065	metal ion homeostasis	3/178	111/16967	0.600788	Glyma.20G166100/Glyma.02G308600/Glyma.01G106700	3
BP	GO:0006220	pyrimidine nucleotide metabolic process	2/178	55/16967	0.600788	Glyma.05G131400/Glyma.05G023900	2
BP	GO:0009737	response to abscisic acid	3/178	113/16967	0.600788	Glyma.01G124700/Glyma.07G056900/Glyma.14G145400	3
BP	GO:0097305	response to alcohol	3/178	113/16967	0.600788	Glyma.01G124700/Glyma.07G056900/Glyma.14G145400	3
BP	GO:0006598	polyamine catabolic process	1/178	12/16967	0.600788	Glyma.02G240000	1
BP	GO:0006714	sesquiterpenoid metabolic process	1/178	12/16967	0.600788	Glyma.11G151700	1
BP	GO:0009264	deoxyribonucleotide catabolic process	1/178	12/16967	0.600788	Glyma.05G023900	1
BP	GO:0010167	response to nitrate	1/178	12/16967	0.600788	Glyma.17G139400	1
BP	GO:0044205	'de novo' UMP biosynthetic process	1/178	12/16967	0.600788	Glyma.05G131400	1
BP	GO:0120255	olefinic compound biosynthetic process	1/178	12/16967	0.600788	Glyma.11G151700	1
BP	GO:0006520	cellular amino acid metabolic process	8/178	467/16967	0.600788	Glyma.05G188500/Glyma.13G000200/Glyma.16G218500/Glyma.20G126800/Glyma.05G131400/Glyma.02G241400/Glyma.18G041100/Glyma.06G235900	8
BP	GO:0016567	protein ubiquitination	8/178	468/16967	0.600788	Glyma.09G115100/Glyma.11G022400/Glyma.02G013000/Glyma.01G180000/Glyma.09G067900/Glyma.18G216600/Glyma.03G226500/Glyma.06G075000	8
BP	GO:0042594	response to starvation	2/178	57/16967	0.600788	Glyma.17G013000/Glyma.06G306300	2
BP	GO:0000966	RNA 5'-end processing	1/178	13/16967	0.600788	Glyma.03G033200	1
BP	GO:0006166	purine ribonucleoside salvage	1/178	13/16967	0.600788	Glyma.17G212100	1
BP	GO:0032011	ARF protein signal transduction	1/178	13/16967	0.600788	Glyma.11G221800	1
BP	GO:0032012	regulation of ARF protein signal transduction	1/178	13/16967	0.600788	Glyma.11G221800	1
BP	GO:0034471	ncRNA 5'-end processing	1/178	13/16967	0.600788	Glyma.03G033200	1
BP	GO:0043174	nucleoside salvage	1/178	13/16967	0.600788	Glyma.17G212100	1
BP	GO:0043255	regulation of carbohydrate biosynthetic process	1/178	13/16967	0.600788	Glyma.10G012900	1
BP	GO:0044209	AMP salvage	1/178	13/16967	0.600788	Glyma.17G212100	1
BP	GO:0046083	adenine metabolic process	1/178	13/16967	0.600788	Glyma.17G212100	1
BP	GO:0046084	adenine biosynthetic process	1/178	13/16967	0.600788	Glyma.17G212100	1
BP	GO:0015849	organic acid transport	4/178	184/16967	0.600788	Glyma.18G071700/Glyma.19G087200/Glyma.08G129600/Glyma.20G101400	4
BP	GO:0031667	response to nutrient levels	2/178	61/16967	0.600788	Glyma.17G013000/Glyma.06G306300	2
BP	GO:0009394	2'-deoxyribonucleotide metabolic process	1/178	14/16967	0.600788	Glyma.05G023900	1
BP	GO:0010109	regulation of photosynthesis	1/178	14/16967	0.600788	Glyma.10G012900	1
BP	GO:0015807	L-amino acid transport	1/178	14/16967	0.600788	Glyma.08G129600	1
BP	GO:0019692	deoxyribose phosphate metabolic process	1/178	14/16967	0.600788	Glyma.05G023900	1
BP	GO:0030835	negative regulation of actin filament depolymerization	1/178	14/16967	0.600788	Glyma.17G061200	1
BP	GO:0043242	negative regulation of protein-containing complex disassembly	1/178	14/16967	0.600788	Glyma.17G061200	1
BP	GO:0046578	regulation of Ras protein signal transduction	1/178	14/16967	0.600788	Glyma.11G221800	1
BP	GO:0051056	regulation of small GTPase mediated signal transduction	1/178	14/16967	0.600788	Glyma.11G221800	1
BP	GO:0051693	actin filament capping	1/178	14/16967	0.600788	Glyma.17G061200	1
BP	GO:1901880	negative regulation of protein depolymerization	1/178	14/16967	0.600788	Glyma.17G061200	1
BP	GO:0000910	cytokinesis	2/178	62/16967	0.600788	Glyma.01G232500/Glyma.12G192100	2
BP	GO:0006637	acyl-CoA metabolic process	2/178	62/16967	0.600788	Glyma.12G183400/Glyma.15G140200	2
BP	GO:0035383	thioester metabolic process	2/178	62/16967	0.600788	Glyma.12G183400/Glyma.15G140200	2
BP	GO:0009606	tropism	2/178	63/16967	0.600788	Glyma.18G220100/Glyma.05G015000	2
BP	GO:0030244	cellulose biosynthetic process	2/178	63/16967	0.600788	Glyma.01G232500/Glyma.12G192100	2
BP	GO:0042440	pigment metabolic process	3/178	124/16967	0.600788	Glyma.02G158700/Glyma.17G212100/Glyma.12G010600	3
BP	GO:0000278	mitotic cell cycle	6/178	337/16967	0.600788	Glyma.18G102000/Glyma.19G113000/Glyma.02G212400/Glyma.01G232500/Glyma.08G217800/Glyma.12G192100	6
BP	GO:0000079	regulation of cyclin-dependent protein serine/threonine kinase activity	2/178	64/16967	0.600788	Glyma.18G102000/Glyma.02G212400	2
BP	GO:1904029	regulation of cyclin-dependent protein kinase activity	2/178	64/16967	0.600788	Glyma.18G102000/Glyma.02G212400	2
BP	GO:0006109	regulation of carbohydrate metabolic process	1/178	15/16967	0.600788	Glyma.10G012900	1
BP	GO:0010274	hydrotropism	1/178	15/16967	0.600788	Glyma.05G015000	1
BP	GO:0016925	protein sumoylation	1/178	15/16967	0.600788	Glyma.18G165200	1
BP	GO:0120254	olefinic compound metabolic process	1/178	15/16967	0.600788	Glyma.11G151700	1
BP	GO:0051235	maintenance of location	2/178	65/16967	0.600788	Glyma.18G220100/Glyma.20G166100	2
BP	GO:0015718	monocarboxylic acid transport	1/178	16/16967	0.600788	Glyma.19G087200	1
BP	GO:0030026	cellular manganese ion homeostasis	1/178	16/16967	0.600788	Glyma.20G166100	1
BP	GO:0046654	tetrahydrofolate biosynthetic process	1/178	16/16967	0.600788	Glyma.07G068300	1
BP	GO:0048015	phosphatidylinositol-mediated signaling	1/178	16/16967	0.600788	Glyma.18G027100	1
BP	GO:0000302	response to reactive oxygen species	2/178	68/16967	0.600788	Glyma.13G205800/Glyma.02G308600	2
BP	GO:0071900	regulation of protein serine/threonine kinase activity	2/178	68/16967	0.600788	Glyma.18G102000/Glyma.02G212400	2
BP	GO:1903047	mitotic cell cycle process	5/178	275/16967	0.600788	Glyma.18G102000/Glyma.02G212400/Glyma.01G232500/Glyma.08G217800/Glyma.12G192100	5
BP	GO:0006167	AMP biosynthetic process	1/178	17/16967	0.600788	Glyma.17G212100	1
BP	GO:0006282	regulation of DNA repair	1/178	17/16967	0.600788	Glyma.14G011300	1
BP	GO:0009074	aromatic amino acid family catabolic process	1/178	17/16967	0.600788	Glyma.20G126800	1
BP	GO:0009113	purine nucleobase biosynthetic process	1/178	17/16967	0.600788	Glyma.17G212100	1
BP	GO:0009166	nucleotide catabolic process	1/178	17/16967	0.600788	Glyma.05G023900	1
BP	GO:0030834	regulation of actin filament depolymerization	1/178	17/16967	0.600788	Glyma.17G061200	1
BP	GO:0032261	purine nucleotide salvage	1/178	17/16967	0.600788	Glyma.17G212100	1
BP	GO:0043101	purine-containing compound salvage	1/178	17/16967	0.600788	Glyma.17G212100	1
BP	GO:0046292	formaldehyde metabolic process	1/178	17/16967	0.600788	Glyma.02G274100	1
BP	GO:0046294	formaldehyde catabolic process	1/178	17/16967	0.600788	Glyma.02G274100	1
BP	GO:0046655	folic acid metabolic process	1/178	17/16967	0.600788	Glyma.07G068300	1
BP	GO:0055071	manganese ion homeostasis	1/178	17/16967	0.600788	Glyma.20G166100	1
BP	GO:0106380	purine ribonucleotide salvage	1/178	17/16967	0.600788	Glyma.17G212100	1
BP	GO:0110095	cellular detoxification of aldehyde	1/178	17/16967	0.600788	Glyma.02G274100	1
BP	GO:0110096	cellular response to aldehyde	1/178	17/16967	0.600788	Glyma.02G274100	1
BP	GO:1901879	regulation of protein depolymerization	1/178	17/16967	0.600788	Glyma.17G061200	1
BP	GO:0009156	ribonucleoside monophosphate biosynthetic process	2/178	71/16967	0.600788	Glyma.17G212100/Glyma.05G131400	2
BP	GO:0008356	asymmetric cell division	1/178	18/16967	0.600788	Glyma.18G220100	1
BP	GO:0072529	pyrimidine-containing compound catabolic process	1/178	18/16967	0.600788	Glyma.05G023900	1
BP	GO:0009161	ribonucleoside monophosphate metabolic process	2/178	72/16967	0.600788	Glyma.17G212100/Glyma.05G131400	2
BP	GO:0048583	regulation of response to stimulus	4/178	210/16967	0.600788	Glyma.15G118400/Glyma.11G221800/Glyma.14G011300/Glyma.02G308600	4
BP	GO:0000054	ribosomal subunit export from nucleus	1/178	19/16967	0.600788	Glyma.20G215000	1
BP	GO:0003002	regionalization	1/178	19/16967	0.600788	Glyma.18G220100	1
BP	GO:0005992	trehalose biosynthetic process	1/178	19/16967	0.600788	Glyma.06G104800	1
BP	GO:0033750	ribosome localization	1/178	19/16967	0.600788	Glyma.20G215000	1
BP	GO:0048017	inositol lipid-mediated signaling	1/178	19/16967	0.600788	Glyma.18G027100	1
BP	GO:0071428	rRNA-containing ribonucleoprotein complex export from nucleus	1/178	19/16967	0.600788	Glyma.20G215000	1
BP	GO:0045859	regulation of protein kinase activity	2/178	74/16967	0.600788	Glyma.18G102000/Glyma.02G212400	2
BP	GO:0042364	water-soluble vitamin biosynthetic process	2/178	75/16967	0.600788	Glyma.18G065700/Glyma.07G068300	2
BP	GO:1901605	alpha-amino acid metabolic process	5/178	288/16967	0.600788	Glyma.05G188500/Glyma.16G218500/Glyma.20G126800/Glyma.02G241400/Glyma.18G041100	5
BP	GO:0009124	nucleoside monophosphate biosynthetic process	2/178	76/16967	0.600788	Glyma.17G212100/Glyma.05G131400	2
BP	GO:0005991	trehalose metabolic process	1/178	20/16967	0.600788	Glyma.06G104800	1
BP	GO:0006222	UMP biosynthetic process	1/178	20/16967	0.600788	Glyma.05G131400	1
BP	GO:0006526	arginine biosynthetic process	1/178	20/16967	0.600788	Glyma.05G188500	1
BP	GO:0009173	pyrimidine ribonucleoside monophosphate metabolic process	1/178	20/16967	0.600788	Glyma.05G131400	1
BP	GO:0009174	pyrimidine ribonucleoside monophosphate biosynthetic process	1/178	20/16967	0.600788	Glyma.05G131400	1
BP	GO:0009228	thiamine biosynthetic process	1/178	20/16967	0.600788	Glyma.18G065700	1
BP	GO:0016075	rRNA catabolic process	1/178	20/16967	0.600788	Glyma.14G021600	1
BP	GO:0019432	triglyceride biosynthetic process	1/178	20/16967	0.600788	Glyma.07G000300	1
BP	GO:0034661	ncRNA catabolic process	1/178	20/16967	0.600788	Glyma.14G021600	1
BP	GO:0046049	UMP metabolic process	1/178	20/16967	0.600788	Glyma.05G131400	1
BP	GO:0046460	neutral lipid biosynthetic process	1/178	20/16967	0.600788	Glyma.07G000300	1
BP	GO:0046463	acylglycerol biosynthetic process	1/178	20/16967	0.600788	Glyma.07G000300	1
BP	GO:2001020	regulation of response to DNA damage stimulus	1/178	20/16967	0.600788	Glyma.14G011300	1
BP	GO:1901701	cellular response to oxygen-containing compound	4/178	216/16967	0.600788	Glyma.02G274100/Glyma.01G124700/Glyma.07G056900/Glyma.14G145400	4
BP	GO:0009123	nucleoside monophosphate metabolic process	2/178	77/16967	0.600788	Glyma.17G212100/Glyma.05G131400	2
BP	GO:0051274	beta-glucan biosynthetic process	2/178	77/16967	0.600788	Glyma.01G232500/Glyma.12G192100	2
BP	GO:0050790	regulation of catalytic activity	5/178	293/16967	0.600788	Glyma.06G152400/Glyma.18G102000/Glyma.01G124700/Glyma.02G212400/Glyma.01G211300	5
BP	GO:0009117	nucleotide metabolic process	6/178	371/16967	0.600788	Glyma.12G183400/Glyma.17G212100/Glyma.20G136200/Glyma.15G140200/Glyma.05G131400/Glyma.05G023900	6
BP	GO:0006772	thiamine metabolic process	1/178	21/16967	0.600788	Glyma.18G065700	1
BP	GO:0006880	intracellular sequestering of iron ion	1/178	21/16967	0.600788	Glyma.20G166100	1
BP	GO:0007140	male meiotic nuclear division	1/178	21/16967	0.600788	Glyma.02G241700	1
BP	GO:0007276	gamete generation	1/178	21/16967	0.600788	Glyma.02G241700	1
BP	GO:0009699	phenylpropanoid biosynthetic process	1/178	21/16967	0.600788	Glyma.12G183400	1
BP	GO:0022412	cellular process involved in reproduction in multicellular organism	1/178	21/16967	0.600788	Glyma.02G241700	1
BP	GO:0042723	thiamine-containing compound metabolic process	1/178	21/16967	0.600788	Glyma.18G065700	1
BP	GO:0042724	thiamine-containing compound biosynthetic process	1/178	21/16967	0.600788	Glyma.18G065700	1
BP	GO:0043622	cortical microtubule organization	1/178	21/16967	0.600788	Glyma.08G017200	1
BP	GO:0046033	AMP metabolic process	1/178	21/16967	0.600788	Glyma.17G212100	1
BP	GO:0048232	male gamete generation	1/178	21/16967	0.600788	Glyma.02G241700	1
BP	GO:0051238	sequestering of metal ion	1/178	21/16967	0.600788	Glyma.20G166100	1
BP	GO:0097577	sequestering of iron ion	1/178	21/16967	0.600788	Glyma.20G166100	1
BP	GO:0006066	alcohol metabolic process	3/178	147/16967	0.600788	Glyma.18G065700/Glyma.11G151700/Glyma.18G255000	3
BP	GO:0065009	regulation of molecular function	5/178	298/16967	0.600788	Glyma.06G152400/Glyma.18G102000/Glyma.01G124700/Glyma.02G212400/Glyma.01G211300	5
BP	GO:0043549	regulation of kinase activity	2/178	80/16967	0.600788	Glyma.18G102000/Glyma.02G212400	2
BP	GO:0009259	ribonucleotide metabolic process	5/178	299/16967	0.600788	Glyma.12G183400/Glyma.17G212100/Glyma.20G136200/Glyma.15G140200/Glyma.05G131400	5
BP	GO:0006638	neutral lipid metabolic process	1/178	22/16967	0.600788	Glyma.07G000300	1
BP	GO:0006639	acylglycerol metabolic process	1/178	22/16967	0.600788	Glyma.07G000300	1
BP	GO:0006641	triglyceride metabolic process	1/178	22/16967	0.600788	Glyma.07G000300	1
BP	GO:0006662	glycerol ether metabolic process	1/178	22/16967	0.600788	Glyma.18G127400	1
BP	GO:0010252	auxin homeostasis	1/178	22/16967	0.600788	Glyma.13G048200	1
BP	GO:0018904	ether metabolic process	1/178	22/16967	0.600788	Glyma.18G127400	1
BP	GO:0030837	negative regulation of actin filament polymerization	1/178	22/16967	0.600788	Glyma.17G061200	1
BP	GO:0031333	negative regulation of protein-containing complex assembly	1/178	22/16967	0.600788	Glyma.17G061200	1
BP	GO:0032272	negative regulation of protein polymerization	1/178	22/16967	0.600788	Glyma.17G061200	1
BP	GO:0051494	negative regulation of cytoskeleton organization	1/178	22/16967	0.600788	Glyma.17G061200	1
BP	GO:1902904	negative regulation of supramolecular fiber organization	1/178	22/16967	0.600788	Glyma.17G061200	1
BP	GO:1901615	organic hydroxy compound metabolic process	5/178	300/16967	0.600788	Glyma.04G035000/Glyma.04G083100/Glyma.18G065700/Glyma.11G151700/Glyma.18G255000	5
BP	GO:0001932	regulation of protein phosphorylation	2/178	81/16967	0.600788	Glyma.18G102000/Glyma.02G212400	2
BP	GO:0006820	anion transport	3/178	152/16967	0.600788	Glyma.19G087200/Glyma.08G129600/Glyma.20G101400	3
BP	GO:0019220	regulation of phosphate metabolic process	3/178	152/16967	0.600788	Glyma.18G102000/Glyma.01G124700/Glyma.02G212400	3
BP	GO:0051174	regulation of phosphorus metabolic process	3/178	152/16967	0.600788	Glyma.18G102000/Glyma.01G124700/Glyma.02G212400	3
BP	GO:0006085	acetyl-CoA biosynthetic process	1/178	23/16967	0.600788	Glyma.15G140200	1
BP	GO:0006857	oligopeptide transport	1/178	23/16967	0.600788	Glyma.17G139400	1
BP	GO:0007389	pattern specification process	1/178	23/16967	0.600788	Glyma.18G220100	1
BP	GO:0009262	deoxyribonucleotide metabolic process	1/178	23/16967	0.600788	Glyma.05G023900	1
BP	GO:0009396	folic acid-containing compound biosynthetic process	1/178	23/16967	0.600788	Glyma.07G068300	1
BP	GO:0015833	peptide transport	1/178	23/16967	0.600788	Glyma.17G139400	1
BP	GO:1901568	fatty acid derivative metabolic process	1/178	23/16967	0.600788	Glyma.12G183400	1
BP	GO:0042180	cellular ketone metabolic process	2/178	83/16967	0.600788	Glyma.20G126800/Glyma.04G083100	2
BP	GO:0002682	regulation of immune system process	1/178	24/16967	0.600788	Glyma.15G118400	1
BP	GO:0002831	regulation of response to biotic stimulus	1/178	24/16967	0.600788	Glyma.15G118400	1
BP	GO:0006568	tryptophan metabolic process	1/178	24/16967	0.600788	Glyma.20G126800	1
BP	GO:0006586	indolalkylamine metabolic process	1/178	24/16967	0.600788	Glyma.20G126800	1
BP	GO:0009163	nucleoside biosynthetic process	1/178	24/16967	0.600788	Glyma.17G212100	1
BP	GO:0015977	carbon fixation	1/178	24/16967	0.600788	Glyma.10G012900	1
BP	GO:0016246	RNA interference	1/178	24/16967	0.600788	Glyma.14G021600	1
BP	GO:0030422	production of siRNA involved in RNA interference	1/178	24/16967	0.600788	Glyma.14G021600	1
BP	GO:0032101	regulation of response to external stimulus	1/178	24/16967	0.600788	Glyma.15G118400	1
BP	GO:0034309	primary alcohol biosynthetic process	1/178	24/16967	0.600788	Glyma.18G065700	1
BP	GO:0034404	nucleobase-containing small molecule biosynthetic process	1/178	24/16967	0.600788	Glyma.17G212100	1
BP	GO:0042451	purine nucleoside biosynthetic process	1/178	24/16967	0.600788	Glyma.17G212100	1
BP	GO:0042455	ribonucleoside biosynthetic process	1/178	24/16967	0.600788	Glyma.17G212100	1
BP	GO:0046128	purine ribonucleoside metabolic process	1/178	24/16967	0.600788	Glyma.17G212100	1
BP	GO:0046129	purine ribonucleoside biosynthetic process	1/178	24/16967	0.600788	Glyma.17G212100	1
BP	GO:0050776	regulation of immune response	1/178	24/16967	0.600788	Glyma.15G118400	1
BP	GO:0072595	maintenance of protein localization in organelle	1/178	24/16967	0.600788	Glyma.18G220100	1
BP	GO:0006753	nucleoside phosphate metabolic process	6/178	389/16967	0.602127	Glyma.12G183400/Glyma.17G212100/Glyma.20G136200/Glyma.15G140200/Glyma.05G131400/Glyma.05G023900	6
BP	GO:0019693	ribose phosphate metabolic process	5/178	312/16967	0.60397	Glyma.12G183400/Glyma.17G212100/Glyma.20G136200/Glyma.15G140200/Glyma.05G131400	5
BP	GO:0042325	regulation of phosphorylation	2/178	87/16967	0.60397	Glyma.18G102000/Glyma.02G212400	2
BP	GO:0009129	pyrimidine nucleoside monophosphate metabolic process	1/178	25/16967	0.60397	Glyma.05G131400	1
BP	GO:0009130	pyrimidine nucleoside monophosphate biosynthetic process	1/178	25/16967	0.60397	Glyma.05G131400	1
BP	GO:0045165	cell fate commitment	1/178	25/16967	0.60397	Glyma.18G220100	1
BP	GO:0030001	metal ion transport	3/178	159/16967	0.60397	Glyma.07G049200/Glyma.01G242000/Glyma.11G169300	3
BP	GO:0006811	ion transport	6/178	395/16967	0.60397	Glyma.07G049200/Glyma.01G242000/Glyma.19G087200/Glyma.08G129600/Glyma.11G169300/Glyma.20G101400	6
BP	GO:0009110	vitamin biosynthetic process	2/178	88/16967	0.60397	Glyma.18G065700/Glyma.07G068300	2
BP	GO:0071396	cellular response to lipid	3/178	161/16967	0.60397	Glyma.01G124700/Glyma.07G056900/Glyma.14G145400	3
BP	GO:0006020	inositol metabolic process	1/178	26/16967	0.60397	Glyma.18G255000	1
BP	GO:0006144	purine nucleobase metabolic process	1/178	26/16967	0.60397	Glyma.17G212100	1
BP	GO:0007265	Ras protein signal transduction	1/178	26/16967	0.60397	Glyma.11G221800	1
BP	GO:0015693	magnesium ion transport	1/178	26/16967	0.60397	Glyma.01G242000	1
BP	GO:0050821	protein stabilization	1/178	26/16967	0.60397	Glyma.03G051600	1
BP	GO:0006767	water-soluble vitamin metabolic process	2/178	90/16967	0.60397	Glyma.18G065700/Glyma.07G068300	2
BP	GO:0051338	regulation of transferase activity	2/178	91/16967	0.60397	Glyma.18G102000/Glyma.02G212400	2
BP	GO:0031399	regulation of protein modification process	3/178	164/16967	0.60397	Glyma.18G102000/Glyma.01G124700/Glyma.02G212400	3
BP	GO:0006893	Golgi to plasma membrane transport	1/178	27/16967	0.60397	Glyma.14G078400	1
BP	GO:0009119	ribonucleoside metabolic process	1/178	27/16967	0.60397	Glyma.17G212100	1
BP	GO:0009812	flavonoid metabolic process	1/178	27/16967	0.60397	Glyma.02G158700	1
BP	GO:0009813	flavonoid biosynthetic process	1/178	27/16967	0.60397	Glyma.02G158700	1
BP	GO:0009850	auxin metabolic process	1/178	27/16967	0.60397	Glyma.13G048200	1
BP	GO:0015743	malate transport	1/178	27/16967	0.60397	Glyma.20G101400	1
BP	GO:0042559	pteridine-containing compound biosynthetic process	1/178	27/16967	0.60397	Glyma.07G068300	1
BP	GO:1901659	glycosyl compound biosynthetic process	1/178	27/16967	0.60397	Glyma.17G212100	1
BP	GO:0030243	cellulose metabolic process	2/178	92/16967	0.607547	Glyma.01G232500/Glyma.12G192100	2
BP	GO:0031146	SCF-dependent proteasomal ubiquitin-dependent protein catabolic process	2/178	93/16967	0.607547	Glyma.11G054300/Glyma.01G187800	2
BP	GO:0007064	mitotic sister chromatid cohesion	1/178	28/16967	0.607547	Glyma.08G217800	1
BP	GO:0015740	C4-dicarboxylate transport	1/178	28/16967	0.607547	Glyma.20G101400	1
BP	GO:0031647	regulation of protein stability	1/178	28/16967	0.607547	Glyma.03G051600	1
BP	GO:0042430	indole-containing compound metabolic process	1/178	28/16967	0.607547	Glyma.20G126800	1
BP	GO:0048268	clathrin coat assembly	1/178	28/16967	0.607547	Glyma.09G156200	1
BP	GO:0006875	cellular metal ion homeostasis	2/178	94/16967	0.607547	Glyma.20G166100/Glyma.01G106700	2
BP	GO:0006914	autophagy	2/178	95/16967	0.607547	Glyma.17G013000/Glyma.06G306300	2
BP	GO:0033865	nucleoside bisphosphate metabolic process	2/178	95/16967	0.607547	Glyma.12G183400/Glyma.15G140200	2
BP	GO:0033875	ribonucleoside bisphosphate metabolic process	2/178	95/16967	0.607547	Glyma.12G183400/Glyma.15G140200	2
BP	GO:0034032	purine nucleoside bisphosphate metabolic process	2/178	95/16967	0.607547	Glyma.12G183400/Glyma.15G140200	2
BP	GO:0061919	process utilizing autophagic mechanism	2/178	95/16967	0.607547	Glyma.17G013000/Glyma.06G306300	2
BP	GO:0032787	monocarboxylic acid metabolic process	6/178	411/16967	0.607547	Glyma.04G083100/Glyma.20G136200/Glyma.15G140200/Glyma.11G151700/Glyma.10G124700/Glyma.18G134600	6
BP	GO:0009767	photosynthetic electron transport chain	1/178	29/16967	0.607547	Glyma.13G286500	1
BP	GO:0034308	primary alcohol metabolic process	1/178	29/16967	0.607547	Glyma.18G065700	1
BP	GO:0006525	arginine metabolic process	1/178	30/16967	0.610928	Glyma.05G188500	1
BP	GO:0006635	fatty acid beta-oxidation	1/178	30/16967	0.610928	Glyma.10G124700	1
BP	GO:0009147	pyrimidine nucleoside triphosphate metabolic process	1/178	30/16967	0.610928	Glyma.05G023900	1
BP	GO:0010228	vegetative to reproductive phase transition of meristem	1/178	30/16967	0.610928	Glyma.09G143500	1
BP	GO:0015914	phospholipid transport	1/178	30/16967	0.610928	Glyma.20G208100	1
BP	GO:0042398	cellular modified amino acid biosynthetic process	1/178	30/16967	0.610928	Glyma.07G068300	1
BP	GO:0043244	regulation of protein-containing complex disassembly	1/178	30/16967	0.610928	Glyma.17G061200	1
BP	GO:0009260	ribonucleotide biosynthetic process	3/178	173/16967	0.612102	Glyma.17G212100/Glyma.15G140200/Glyma.05G131400	3
BP	GO:0030042	actin filament depolymerization	1/178	31/16967	0.614782	Glyma.17G061200	1
BP	GO:0042278	purine nucleoside metabolic process	1/178	31/16967	0.614782	Glyma.17G212100	1
BP	GO:0097237	cellular response to toxic substance	1/178	31/16967	0.614782	Glyma.02G274100	1
BP	GO:1990748	cellular detoxification	1/178	31/16967	0.614782	Glyma.02G274100	1
BP	GO:0055080	cation homeostasis	3/178	176/16967	0.614782	Glyma.20G166100/Glyma.02G308600/Glyma.01G106700	3
BP	GO:0022900	electron transport chain	2/178	101/16967	0.614782	Glyma.13G286500/Glyma.07G029900	2
BP	GO:0009150	purine ribonucleotide metabolic process	4/178	258/16967	0.614782	Glyma.12G183400/Glyma.17G212100/Glyma.20G136200/Glyma.15G140200	4
BP	GO:0006596	polyamine biosynthetic process	1/178	32/16967	0.614782	Glyma.18G137100	1
BP	GO:0032507	maintenance of protein location in cell	1/178	32/16967	0.614782	Glyma.18G220100	1
BP	GO:0042752	regulation of circadian rhythm	1/178	32/16967	0.614782	Glyma.02G146900	1
BP	GO:0043173	nucleotide salvage	1/178	32/16967	0.614782	Glyma.17G212100	1
BP	GO:0043650	dicarboxylic acid biosynthetic process	1/178	32/16967	0.614782	Glyma.07G068300	1
BP	GO:0045185	maintenance of protein location	1/178	32/16967	0.614782	Glyma.18G220100	1
BP	GO:1901292	nucleoside phosphate catabolic process	1/178	32/16967	0.614782	Glyma.05G023900	1
BP	GO:0006766	vitamin metabolic process	2/178	103/16967	0.615381	Glyma.18G065700/Glyma.07G068300	2
BP	GO:0006879	cellular iron ion homeostasis	1/178	33/16967	0.615381	Glyma.20G166100	1
BP	GO:0031050	dsRNA processing	1/178	33/16967	0.615381	Glyma.14G021600	1
BP	GO:0035384	thioester biosynthetic process	1/178	33/16967	0.615381	Glyma.15G140200	1
BP	GO:0070918	production of small RNA involved in gene silencing by RNA	1/178	33/16967	0.615381	Glyma.14G021600	1
BP	GO:0071616	acyl-CoA biosynthetic process	1/178	33/16967	0.615381	Glyma.15G140200	1
BP	GO:0080135	regulation of cellular response to stress	1/178	33/16967	0.615381	Glyma.14G011300	1
BP	GO:0098754	detoxification	1/178	33/16967	0.615381	Glyma.02G274100	1
BP	GO:0046390	ribose phosphate biosynthetic process	3/178	181/16967	0.616637	Glyma.17G212100/Glyma.15G140200/Glyma.05G131400	3
BP	GO:0098771	inorganic ion homeostasis	3/178	182/16967	0.618821	Glyma.20G166100/Glyma.02G308600/Glyma.01G106700	3
BP	GO:1901617	organic hydroxy compound biosynthetic process	3/178	182/16967	0.618821	Glyma.18G065700/Glyma.11G151700/Glyma.18G255000	3
BP	GO:0035194	post-transcriptional gene silencing by RNA	1/178	34/16967	0.619501	Glyma.14G021600	1
BP	GO:0080163	regulation of protein serine/threonine phosphatase activity	1/178	34/16967	0.619501	Glyma.01G124700	1
BP	GO:0098876	vesicle-mediated transport to the plasma membrane	1/178	34/16967	0.619501	Glyma.14G078400	1
BP	GO:0022402	cell cycle process	6/178	433/16967	0.619651	Glyma.18G102000/Glyma.02G212400/Glyma.02G241700/Glyma.01G232500/Glyma.08G217800/Glyma.12G192100	6
BP	GO:0051273	beta-glucan metabolic process	2/178	106/16967	0.619651	Glyma.01G232500/Glyma.12G192100	2
BP	GO:0016226	iron-sulfur cluster assembly	1/178	35/16967	0.619651	Glyma.12G141400	1
BP	GO:0016441	posttranscriptional gene silencing	1/178	35/16967	0.619651	Glyma.14G021600	1
BP	GO:0019395	fatty acid oxidation	1/178	35/16967	0.619651	Glyma.10G124700	1
BP	GO:0031163	metallo-sulfur cluster assembly	1/178	35/16967	0.619651	Glyma.12G141400	1
BP	GO:0043647	inositol phosphate metabolic process	1/178	35/16967	0.619651	Glyma.18G255000	1
BP	GO:0046351	disaccharide biosynthetic process	1/178	35/16967	0.619651	Glyma.06G104800	1
BP	GO:0006163	purine nucleotide metabolic process	4/178	269/16967	0.624841	Glyma.12G183400/Glyma.17G212100/Glyma.20G136200/Glyma.15G140200	4
BP	GO:0009062	fatty acid catabolic process	1/178	36/16967	0.626849	Glyma.10G124700	1
BP	GO:0032504	multicellular organism reproduction	1/178	36/16967	0.626849	Glyma.02G241700	1
BP	GO:0048609	multicellular organismal reproductive process	1/178	36/16967	0.626849	Glyma.02G241700	1
BP	GO:0000160	phosphorelay signal transduction system	2/178	109/16967	0.627238	Glyma.18G130900/Glyma.10G157800	2
BP	GO:0044772	mitotic cell cycle phase transition	2/178	110/16967	0.628317	Glyma.18G102000/Glyma.02G212400	2
BP	GO:0006084	acetyl-CoA metabolic process	1/178	37/16967	0.628317	Glyma.15G140200	1
BP	GO:0009629	response to gravity	1/178	37/16967	0.628317	Glyma.18G220100	1
BP	GO:0009630	gravitropism	1/178	37/16967	0.628317	Glyma.18G220100	1
BP	GO:0046653	tetrahydrofolate metabolic process	1/178	37/16967	0.628317	Glyma.07G068300	1
BP	GO:0048366	leaf development	1/178	37/16967	0.628317	Glyma.18G220100	1
BP	GO:0008202	steroid metabolic process	2/178	111/16967	0.629584	Glyma.04G035000/Glyma.19G006900	2
BP	GO:0042445	hormone metabolic process	2/178	112/16967	0.629584	Glyma.13G048200/Glyma.14G218100	2
BP	GO:0048878	chemical homeostasis	4/178	276/16967	0.629584	Glyma.13G048200/Glyma.20G166100/Glyma.02G308600/Glyma.01G106700	4
BP	GO:0019953	sexual reproduction	1/178	38/16967	0.629584	Glyma.02G241700	1
BP	GO:0030865	cortical cytoskeleton organization	1/178	38/16967	0.629584	Glyma.08G017200	1
BP	GO:0042542	response to hydrogen peroxide	1/178	38/16967	0.629584	Glyma.13G205800	1
BP	GO:0044703	multi-organism reproductive process	1/178	38/16967	0.629584	Glyma.02G241700	1
BP	GO:0018205	peptidyl-lysine modification	2/178	114/16967	0.634138	Glyma.18G165200/Glyma.20G134600	2
BP	GO:0046148	pigment biosynthetic process	2/178	114/16967	0.634138	Glyma.02G158700/Glyma.17G212100	2
BP	GO:0044550	secondary metabolite biosynthetic process	1/178	39/16967	0.634138	Glyma.12G183400	1
BP	GO:0046173	polyol biosynthetic process	1/178	39/16967	0.634138	Glyma.18G255000	1
BP	GO:1902531	regulation of intracellular signal transduction	1/178	39/16967	0.634138	Glyma.11G221800	1
BP	GO:0050801	ion homeostasis	3/178	196/16967	0.634571	Glyma.20G166100/Glyma.02G308600/Glyma.01G106700	3
BP	GO:0007186	G protein-coupled receptor signaling pathway	1/178	40/16967	0.643679	Glyma.11G060300	1
BP	GO:0031122	cytoplasmic microtubule organization	1/178	41/16967	0.652981	Glyma.08G017200	1
BP	GO:0051259	protein complex oligomerization	1/178	41/16967	0.652981	Glyma.13G205800	1
BP	GO:0034655	nucleobase-containing compound catabolic process	3/178	202/16967	0.659547	Glyma.15G068600/Glyma.14G021600/Glyma.05G023900	3
BP	GO:0009691	cytokinin biosynthetic process	1/178	42/16967	0.661966	Glyma.14G218100	1
BP	GO:0016579	protein deubiquitination	2/178	120/16967	0.661966	Glyma.16G179500/Glyma.14G192300	2
BP	GO:0009127	purine nucleoside monophosphate biosynthetic process	1/178	43/16967	0.661966	Glyma.17G212100	1
BP	GO:0009168	purine ribonucleoside monophosphate biosynthetic process	1/178	43/16967	0.661966	Glyma.17G212100	1
BP	GO:0009218	pyrimidine ribonucleotide metabolic process	1/178	43/16967	0.661966	Glyma.05G131400	1
BP	GO:0009220	pyrimidine ribonucleotide biosynthetic process	1/178	43/16967	0.661966	Glyma.05G131400	1
BP	GO:0030041	actin filament polymerization	1/178	43/16967	0.661966	Glyma.17G061200	1
BP	GO:0030833	regulation of actin filament polymerization	1/178	43/16967	0.661966	Glyma.17G061200	1
BP	GO:0009126	purine nucleoside monophosphate metabolic process	1/178	44/16967	0.663141	Glyma.17G212100	1
BP	GO:0009167	purine ribonucleoside monophosphate metabolic process	1/178	44/16967	0.663141	Glyma.17G212100	1
BP	GO:0050832	defense response to fungus	1/178	44/16967	0.663141	Glyma.15G118400	1
BP	GO:0010035	response to inorganic substance	2/178	124/16967	0.663141	Glyma.13G205800/Glyma.17G139400	2
BP	GO:0072521	purine-containing compound metabolic process	4/178	296/16967	0.663141	Glyma.12G183400/Glyma.17G212100/Glyma.20G136200/Glyma.15G140200	4
BP	GO:0006760	folic acid-containing compound metabolic process	1/178	45/16967	0.663141	Glyma.07G068300	1
BP	GO:0009620	response to fungus	1/178	45/16967	0.663141	Glyma.15G118400	1
BP	GO:0009723	response to ethylene	1/178	45/16967	0.663141	Glyma.04G026300	1
BP	GO:0015994	chlorophyll metabolic process	1/178	45/16967	0.663141	Glyma.12G010600	1
BP	GO:0031347	regulation of defense response	1/178	45/16967	0.663141	Glyma.15G118400	1
BP	GO:0043666	regulation of phosphoprotein phosphatase activity	1/178	45/16967	0.663141	Glyma.01G124700	1
BP	GO:1903825	organic acid transmembrane transport	1/178	45/16967	0.663141	Glyma.19G087200	1
BP	GO:1905039	carboxylic acid transmembrane transport	1/178	45/16967	0.663141	Glyma.19G087200	1
BP	GO:0099402	plant organ development	2/178	126/16967	0.667853	Glyma.18G220100/Glyma.07G101000	2
BP	GO:0034220	ion transmembrane transport	3/178	212/16967	0.667989	Glyma.07G049200/Glyma.19G087200/Glyma.11G169300	3
BP	GO:0044770	cell cycle phase transition	2/178	128/16967	0.667989	Glyma.18G102000/Glyma.02G212400	2
BP	GO:0009736	cytokinin-activated signaling pathway	1/178	47/16967	0.667989	Glyma.10G157800	1
BP	GO:0032271	regulation of protein polymerization	1/178	47/16967	0.667989	Glyma.17G061200	1
BP	GO:0071368	cellular response to cytokinin stimulus	1/178	47/16967	0.667989	Glyma.10G157800	1
BP	GO:0033993	response to lipid	3/178	215/16967	0.667989	Glyma.01G124700/Glyma.07G056900/Glyma.14G145400	3
BP	GO:0009734	auxin-activated signaling pathway	5/178	393/16967	0.667989	Glyma.07G034200/Glyma.10G056300/Glyma.18G071700/Glyma.01G167000/Glyma.08G036400	5
BP	GO:0071365	cellular response to auxin stimulus	5/178	393/16967	0.667989	Glyma.07G034200/Glyma.10G056300/Glyma.18G071700/Glyma.01G167000/Glyma.08G036400	5
BP	GO:0006869	lipid transport	2/178	130/16967	0.667989	Glyma.06G124000/Glyma.20G208100	2
BP	GO:0007062	sister chromatid cohesion	1/178	48/16967	0.667989	Glyma.08G217800	1
BP	GO:0008064	regulation of actin polymerization or depolymerization	1/178	48/16967	0.667989	Glyma.17G061200	1
BP	GO:0009312	oligosaccharide biosynthetic process	1/178	48/16967	0.667989	Glyma.06G104800	1
BP	GO:0009735	response to cytokinin	1/178	48/16967	0.667989	Glyma.10G157800	1
BP	GO:0010921	regulation of phosphatase activity	1/178	48/16967	0.667989	Glyma.01G124700	1
BP	GO:0030832	regulation of actin filament length	1/178	48/16967	0.667989	Glyma.17G061200	1
BP	GO:0110053	regulation of actin filament organization	1/178	48/16967	0.667989	Glyma.17G061200	1
BP	GO:0030003	cellular cation homeostasis	2/178	131/16967	0.671018	Glyma.20G166100/Glyma.01G106700	2
BP	GO:0006091	generation of precursor metabolites and energy	5/178	396/16967	0.671475	Glyma.15G136200/Glyma.13G286500/Glyma.20G136200/Glyma.07G029900/Glyma.07G013800	5
BP	GO:0042592	homeostatic process	4/178	307/16967	0.671475	Glyma.13G048200/Glyma.20G166100/Glyma.02G308600/Glyma.01G106700	4
BP	GO:0042558	pteridine-containing compound metabolic process	1/178	49/16967	0.671475	Glyma.07G068300	1
BP	GO:0009165	nucleotide biosynthetic process	3/178	220/16967	0.671475	Glyma.17G212100/Glyma.15G140200/Glyma.05G131400	3
BP	GO:0000460	maturation of 5.8S rRNA	1/178	50/16967	0.671475	Glyma.20G215000	1
BP	GO:0006221	pyrimidine nucleotide biosynthetic process	1/178	50/16967	0.671475	Glyma.05G131400	1
BP	GO:0007623	circadian rhythm	1/178	50/16967	0.671475	Glyma.02G146900	1
BP	GO:0009152	purine ribonucleotide biosynthetic process	2/178	134/16967	0.671475	Glyma.17G212100/Glyma.15G140200	2
BP	GO:0007017	microtubule-based process	4/178	312/16967	0.671475	Glyma.19G113000/Glyma.07G138900/Glyma.08G043300/Glyma.08G017200	4
BP	GO:0006873	cellular ion homeostasis	2/178	135/16967	0.671475	Glyma.20G166100/Glyma.01G106700	2
[truncated: 709 more rows]

## Sheet: Only K6E_K6 UP
GO enrichment analysis of the up-regulated DEGs between two K6E and K6
[truncated: 1,626 more rows]

## Sheet: Only K6E_K6 DOWN
GO enrichment analysis of the down-regulated DEGs between two K6E and K6
[truncated: 1,120 more rows]
