# Supplementary material for: Identifying Soybean Pod Borer (Leguminivora glycinivorella) Resistance QTLs and the Mechanism of Induced Defense Using Linkage Mapping and RNA-Seq Analysis
Source: Int J Mol Sci. 2022 Sep 18;23(18):10910. doi: 10.3390/ijms231810910 (PMC9504297; doi:10.3390/ijms231810910)
Supplement: Supplementary file 1 [file ijms-23-10910-s001.zip › Table S4.xlsx]

## Sheet: Annotation
The annotation of common response differently expressed genes [DEGs,(|log2 fold change|≥1 and p adjust <0.05)] to SPB eating (CRGs) between two parents
Gene Locus	Ortholog gene of Arabidopsis(TAIR10)	Function	TFs classification	Gene Ontology Biological Process IDs	Gene Ontology Biological Process Descriptions	Gene Ontology Molecular Function IDs	Gene Ontology Molecular Function Descriptions	Gene Ontology Cellular Component IDs	Gene Ontology Cellular Component Descriptions
Glyma.01G004200	AT4G26220	S-adenosyl-L-methionine-dependent methyltransferases superfamily protein		NA	NA	GO:0042409	caffeoyl-CoA O-methyltransferase activity	GO:0005829	cytosol
Glyma.01G006000	AT5G56550	oxidative stress 3		GO:0006979 GO:0046686	response to cadmium ion; response to oxidative stress	GO:0003674	molecular function	GO:0005634 GO:0016607	nuclear speck; nucleus
Glyma.01G013500	AT4G21410	cysteine-rich RLK (RECEPTOR-like protein kinase) 29		GO:0006468 GO:0009737	protein phosphorylation; response to abscisic acid stimulus	GO:0004672 GO:0004674 GO:0005524 GO:0016301 GO:0016772	ATP binding; kinase activity; protein kinase activity; protein serine/threonine kinase activity; transferase activity, transferring phosphorus-containing groups	GO:0005576 GO:0005773 GO:0005886	extracellular region; plasma membrane; vacuole
Glyma.01G014700	AT5G46910	Transcription factor jumonji (jmj) family protein / zinc finger (C5HC2 type) family protein		GO:0006355 GO:0010200	regulation of transcription, DNA-dependent; response to chitin	GO:0003700	sequence-specific DNA binding transcription factor activity	GO:0005634	nucleus
Glyma.01G036000	AT1G24100	UDP-glucosyl transferase 74B1		GO:0006569 GO:0008152 GO:0009684 GO:0019761 GO:0042742 GO:0048767 GO:0052544	defense response by callose deposition in cell wall; defense response to bacterium; glucosinolate biosynthetic process; indoleacetic acid biosynthetic process; metabolic process; root hair elongation; tryptophan catabolic process	GO:0008194 GO:0016757 GO:0016758 GO:0047251	UDP-glycosyltransferase activity; thiohydroximate beta-D-glucosyltransferase activity; transferase activity, transferring glycosyl groups; transferase activity, transferring hexosyl groups	GO:0005634	nucleus
Glyma.01G036900	AT1G59970	Matrixin family protein		GO:0006508 GO:0008152	metabolic process; proteolysis	GO:0004222 GO:0008237 GO:0008270	metalloendopeptidase activity; metallopeptidase activity; zinc ion binding	GO:0005576 GO:0005886 GO:0031012 GO:0031225	anchored to membrane; extracellular matrix; extracellular region; plasma membrane
Glyma.01G041400	AT1G69870	nitrate transporter 1.7		GO:0006857 GO:0015706 GO:0019761 GO:0080055	glucosinolate biosynthetic process; low affinity nitrate transport; nitrate transport; oligopeptide transport	GO:0005215 GO:0080054	low affinity nitrate transmembrane transporter activity; transporter activity	GO:0005886 GO:0016020	membrane; plasma membrane
Glyma.01G046000	AT2G46210	Fatty acid/sphingolipid desaturase		GO:0006629 GO:0006633 GO:0055114	fatty acid biosynthetic process; lipid metabolic process; oxidation-reduction process	GO:0005506 GO:0016491 GO:0016717 GO:0020037	heme binding; iron ion binding; oxidoreductase activity; oxidoreductase activity, acting on paired donors, with oxidation of a pair of donors resulting in the reduction of molecular oxygen to two molecules of water	NA	NA
Glyma.01G050100	AT1G69530	expansin A1		GO:0006949 GO:0009664 GO:0009739 GO:0009826 GO:0009828 GO:0010114 GO:0010119	plant-type cell wall loosening; plant-type cell wall organization; regulation of stomatal movement; response to gibberellin stimulus; response to red light; syncytium formation; unidimensional cell growth	NA	NA	GO:0005576 GO:0009505	extracellular region; plant-type cell wall
Glyma.01G105000	AT2G37900	Major facilitator superfamily protein		GO:0006857	oligopeptide transport	GO:0005215	transporter activity	GO:0005886 GO:0016020	membrane; plasma membrane
Glyma.01G106000	AT3G09270	glutathione S-transferase TAU 8		GO:0006635 GO:0009407 GO:0010583 GO:0043161 GO:0046686 GO:0051788 GO:0080129	fatty acid beta-oxidation; proteasomal ubiquitin-dependent protein catabolic process; proteasome core complex assembly; response to cadmium ion; response to cyclopentenone; response to misfolded protein; toxin catabolic process	GO:0004364	glutathione transferase activity	GO:0005737	cytoplasm
Glyma.01G108700	AT3G54040	PAR1 protein		GO:0000041 GO:0008150	biological process; transition metal ion transport	GO:0003674	molecular function	GO:0009507	chloroplast
Glyma.01G109800	AT3G54100	O-fucosyltransferase family protein		GO:0008150 GO:0030968	biological process; endoplasmic reticulum unfolded protein response	GO:0016757	transferase activity, transferring glycosyl groups	GO:0005794	Golgi apparatus
Glyma.01G112300	AT5G36930	Disease resistance protein (TIR-NBS-LRR class) family		GO:0006952 GO:0007165	defense response; signal transduction	GO:0043531	ADP binding	GO:0005622 GO:0005737	cytoplasm; intracellular
Glyma.01G112900	AT5G01210	HXXXD-type acyl-transferase family protein		NA	NA	GO:0016740 GO:0016747	transferase activity; transferase activity, transferring acyl groups other than amino-acyl groups	GO:0005737	cytoplasm
Glyma.01G115500	NA	NA		NA	NA	NA	NA	NA	NA
Glyma.01G115600	AT3G50120	Plant protein of unknown function (DUF247)		GO:0008150	biological process	GO:0003674	molecular function	GO:0005886	plasma membrane
Glyma.01G119300	AT5G58590	RAN binding protein 1		GO:0000060 GO:0000278 GO:0006396 GO:0006406 GO:0006606	RNA processing; mRNA export from nucleus; mitotic cell cycle; protein import into nucleus; protein import into nucleus, translocation	GO:0005515	protein binding	GO:0005634	nucleus
Glyma.01G128100	AT2G38470	WRKY DNA-binding protein 33	WRKY	GO:0000165 GO:0002679 GO:0006355 GO:0006612 GO:0006944 GO:0006970 GO:0009408 GO:0009409 GO:0009414 GO:0009595 GO:0009651 GO:0009697 GO:0009862 GO:0009863 GO:0009867 GO:0010120 GO:0010200 GO:0010310 GO:0010363 GO:0010508 GO:0031348 GO:0034605 GO:0035556 GO:0042742 GO:0043069 GO:0043900 GO:0050832 GO:0070370	MAPK cascade; camalexin biosynthetic process; cellular heat acclimation; cellular membrane fusion; cellular response to heat; defense response to bacterium; defense response to fungus; detection of biotic stimulus; intracellular signal transduction; jasmonic acid mediated signaling pathway; negative regulation of defense response; negative regulation of programmed cell death; positive regulation …	GO:0003700 GO:0005515	protein binding; sequence-specific DNA binding transcription factor activity	GO:0005634	nucleus
Glyma.01G129100	AT5G01750	Protein of unknown function (DUF567)		GO:0006569 GO:0006995 GO:0008150 GO:0009684 GO:0030003 GO:0070838	biological process; cellular cation homeostasis; cellular response to nitrogen starvation; divalent metal ion transport; indoleacetic acid biosynthetic process; tryptophan catabolic process	GO:0003674	molecular function	GO:0009507	chloroplast
Glyma.01G131900	AT2G30400	ovate family protein 2		GO:0006499 GO:0009407 GO:0010583 GO:0045892 GO:0048513	N-terminal protein myristoylation; negative regulation of transcription, DNA-dependent; organ development; response to cyclopentenone; toxin catabolic process	NA	NA	GO:0005634	nucleus
Glyma.01G153300	AT4G19230	cytochrome P450, family 707, subfamily A, polypeptide 1		GO:0009639 GO:0009687 GO:0048838 GO:0050832 GO:0055114	abscisic acid metabolic process; defense response to fungus; oxidation-reduction process; release of seed from dormancy; response to red or far red light	GO:0005506 GO:0009055 GO:0010295 GO:0016705 GO:0019825 GO:0020037	(+)-abscisic acid 8'-hydroxylase activity; electron carrier activity; heme binding; iron ion binding; oxidoreductase activity, acting on paired donors, with incorporation or reduction of molecular oxygen; oxygen binding	GO:0005576	extracellular region
Glyma.01G158600	AT2G17550	NA		GO:0008150	biological process	GO:0003674	molecular function	GO:0005634	nucleus
Glyma.01G161100	AT1G47670	Transmembrane amino acid transporter family protein		GO:0006865 GO:0010075	amino acid transport; regulation of meristem growth	GO:0015171	amino acid transmembrane transporter activity	GO:0005886 GO:0016020	membrane; plasma membrane
Glyma.01G163000	AT2G17760	Eukaryotic aspartyl protease family protein		GO:0006508 GO:0006865	amino acid transport; proteolysis	GO:0004190	aspartic-type endopeptidase activity	GO:0031225	anchored to membrane
Glyma.01G166100	AT5G66210	calcium-dependent protein kinase 28		GO:0006468 GO:0010200	protein phosphorylation; response to chitin	GO:0004672 GO:0004674 GO:0004683 GO:0004713 GO:0005509 GO:0005524 GO:0016772	ATP binding; calcium ion binding; calmodulin-dependent protein kinase activity; protein kinase activity; protein serine/threonine kinase activity; protein tyrosine kinase activity; transferase activity, transferring phosphorus-containing groups	GO:0005886 GO:0009507	chloroplast; plasma membrane
Glyma.01G168500	AT4G38960	B-box type zinc finger family protein	DBB	GO:0006355 GO:0007623 GO:0009411 GO:0009813	circadian rhythm; flavonoid biosynthetic process; regulation of transcription, DNA-dependent; response to UV	GO:0003700 GO:0008270	sequence-specific DNA binding transcription factor activity; zinc ion binding	GO:0005622 GO:0005634	intracellular; nucleus
Glyma.01G183100	AT5G66920	SKU5 similar 17		GO:0055114 GO:0080167	oxidation-reduction process; response to karrikin	GO:0005507 GO:0016491	copper ion binding; oxidoreductase activity	GO:0005576 GO:0005618 GO:0009505	cell wall; extracellular region; plant-type cell wall
Glyma.01G187400	AT5G67100	DNA-directed DNA polymerases		GO:0000076 GO:0000278 GO:0000724 GO:0000731 GO:0000911 GO:0003002 GO:0006260 GO:0006261 GO:0006269 GO:0006270 GO:0006271 GO:0006275 GO:0006306 GO:0007155 GO:0008283 GO:0009910 GO:0009965 GO:0010090 GO:0010389 GO:0033043 GO:0042023 GO:0045010 GO:0048449 GO:0051567 GO:0051726	DNA-dependent DNA replication; DNA endoreduplication; DNA methylation; DNA replication; DNA replication, synthesis of RNA primer; DNA replication checkpoint; DNA replication initiation; DNA strand elongation involved in DNA replication; DNA synthesis involved in DNA repair; actin nucleation; cell adhesion; cell proliferation; cytokinesis by cell plate formation; double-strand break repair via hom…	GO:0000166 GO:0001882 GO:0003676 GO:0003677 GO:0003887	DNA-directed DNA polymerase activity; DNA binding; nucleic acid binding; nucleoside binding; nucleotide binding	GO:0005634 GO:0005658	alpha DNA polymerase:primase complex; nucleus
Glyma.01G189100	AT2G23320	WRKY DNA-binding protein 15	WRKY	GO:0002679 GO:0006355 GO:0009693 GO:0010200 GO:0035556	ethylene biosynthetic process; intracellular signal transduction; regulation of transcription, DNA-dependent; respiratory burst involved in defense response; response to chitin	GO:0003700 GO:0005516 GO:0043565	calmodulin binding; sequence-specific DNA binding; sequence-specific DNA binding transcription factor activity	GO:0005634	nucleus
Glyma.01G193600	AT4G37640	calcium ATPase 2		GO:0006612 GO:0006754 GO:0006810 GO:0006812 GO:0006820 GO:0006862 GO:0006888 GO:0006944 GO:0008152 GO:0009627 GO:0009697 GO:0010200 GO:0010363 GO:0015696 GO:0015802 GO:0030968 GO:0043069 GO:0043090 GO:0043269 GO:0050832 GO:0070588	ATP biosynthetic process; ER to Golgi vesicle-mediated transport; amino acid import; ammonium transport; anion transport; basic amino acid transport; calcium ion transmembrane transport; cation transport; cellular membrane fusion; defense response to fungus; endoplasmic reticulum unfolded protein response; metabolic process; negative regulation of programmed cell death; nucleotide transport; prot…	GO:0000166 GO:0003824 GO:0005388 GO:0005516 GO:0005524 GO:0015085 GO:0015662 GO:0016820 GO:0046872	ATP binding; ATPase activity, coupled to transmembrane movement of ions, phosphorylative mechanism; calcium-transporting ATPase activity; calcium ion transmembrane transporter activity; calmodulin binding; catalytic activity; hydrolase activity, acting on acid anhydrides, catalyzing transmembrane movement of substances; metal ion binding; nucleotide binding	GO:0005783 GO:0005789 GO:0005886 GO:0016020	endoplasmic reticulum; endoplasmic reticulum membrane; membrane; plasma membrane
Glyma.01G195000	AT2G22900	Galactosyl transferase GMA12/MNN10 family protein		NA	NA	GO:0016740 GO:0016757 GO:0016758	transferase activity; transferase activity, transferring glycosyl groups; transferase activity, transferring hexosyl groups	GO:0005768 GO:0005794 GO:0005802 GO:0016021	Golgi apparatus; endosome; integral to membrane; trans-Golgi network
Glyma.01G197900	AT4G37850	basic helix-loop-helix (bHLH) DNA-binding superfamily protein	bHLH	GO:0006355	regulation of transcription, DNA-dependent	GO:0003677 GO:0003700	DNA binding; sequence-specific DNA binding transcription factor activity	GO:0005634	nucleus
Glyma.01G198200	NA	NA		NA	NA	NA	NA	NA	NA
Glyma.01G203500	AT5G47070	Protein kinase superfamily protein		GO:0006468 GO:0009627 GO:0009697	protein phosphorylation; salicylic acid biosynthetic process; systemic acquired resistance	GO:0004672 GO:0004674 GO:0005524 GO:0016301 GO:0016772	ATP binding; kinase activity; protein kinase activity; protein serine/threonine kinase activity; transferase activity, transferring phosphorus-containing groups	GO:0005886	plasma membrane
Glyma.01G204200	AT4G33950	Protein kinase superfamily protein		GO:0005985 GO:0006468 GO:0006636 GO:0006970 GO:0009414 GO:0009651 GO:0009737 GO:0009738 GO:0010118 GO:0010119 GO:0019432 GO:0040007 GO:0042742 GO:0042744 GO:0048366 GO:2000377	abscisic acid mediated signaling pathway; defense response to bacterium; growth; hydrogen peroxide catabolic process; leaf development; protein phosphorylation; regulation of reactive oxygen species metabolic process; regulation of stomatal movement; response to abscisic acid stimulus; response to osmotic stress; response to salt stress; response to water deprivation; stomatal movement; sucrose m…	GO:0004672 GO:0004674 GO:0004713 GO:0005515 GO:0005524 GO:0009931 GO:0016301 GO:0016772	ATP binding; calcium-dependent protein serine/threonine kinase activity; kinase activity; protein binding; protein kinase activity; protein serine/threonine kinase activity; protein tyrosine kinase activity; transferase activity, transferring phosphorus-containing groups	GO:0005634 GO:0005737 GO:0005829	cytoplasm; cytosol; nucleus
Glyma.01G206500	AT5G60900	receptor-like protein kinase 1		GO:0000165 GO:0006355 GO:0006468 GO:0006612 GO:0009617 GO:0009862 GO:0009867 GO:0010310 GO:0010363 GO:0031348 GO:0035304	MAPK cascade; jasmonic acid mediated signaling pathway; negative regulation of defense response; protein phosphorylation; protein targeting to membrane; regulation of hydrogen peroxide metabolic process; regulation of plant-type hypersensitive response; regulation of protein dephosphorylation; regulation of transcription, DNA-dependent; response to bacterium; systemic acquired resistance, salicyl…	GO:0004672 GO:0004674 GO:0004713 GO:0005524 GO:0016301 GO:0016772 GO:0030246	ATP binding; carbohydrate binding; kinase activity; protein kinase activity; protein serine/threonine kinase activity; protein tyrosine kinase activity; transferase activity, transferring phosphorus-containing groups	GO:0005886	plasma membrane
Glyma.01G206600	AT4G17500	ethylene responsive element binding factor 1	ERF	GO:0002679 GO:0006355 GO:0009414 GO:0009723 GO:0009737 GO:0009738 GO:0009873 GO:0010200 GO:0035556 GO:0042538 GO:0045893	abscisic acid mediated signaling pathway; ethylene mediated signaling pathway; hyperosmotic salinity response; intracellular signal transduction; positive regulation of transcription, DNA-dependent; regulation of transcription, DNA-dependent; respiratory burst involved in defense response; response to abscisic acid stimulus; response to chitin; response to ethylene stimulus; response to water dep…	GO:0003677 GO:0003700	DNA binding; sequence-specific DNA binding transcription factor activity	GO:0005634 GO:0005643	nuclear pore; nucleus
Glyma.01G207900	AT4G17350	Plant protein of unknown function (DUF828) with plant pleckstrin homology-like region		GO:0007165	signal transduction	GO:0005543 GO:0035091	phosphatidylinositol binding; phospholipid binding	GO:0005634	nucleus
Glyma.01G211900	AT4G22730	Leucine-rich repeat protein kinase family protein		GO:0006468 GO:0007169	protein phosphorylation; transmembrane receptor protein tyrosine kinase signaling pathway	GO:0004672 GO:0004674 GO:0005524 GO:0016772	ATP binding; protein kinase activity; protein serine/threonine kinase activity; transferase activity, transferring phosphorus-containing groups	GO:0005886	plasma membrane
Glyma.01G215100	AT2G42010	phospholipase D beta 1		GO:0008152 GO:0009816 GO:0046686	defense response to bacterium, incompatible interaction; metabolic process; response to cadmium ion	GO:0003824 GO:0004630 GO:0005515 GO:0005546	catalytic activity; phosphatidylinositol-4,5-bisphosphate binding; phospholipase D activity; protein binding	GO:0005634 GO:0009506	nucleus; plasmodesma
Glyma.01G216600	AT4G23030	MATE efflux family protein		GO:0006855 GO:0055085	drug transmembrane transport; transmembrane transport	GO:0005215 GO:0015238 GO:0015297	antiporter activity; drug transmembrane transporter activity; transporter activity	GO:0005886 GO:0016020	membrane; plasma membrane
Glyma.01G232000	AT1G71520	Integrase-type DNA-binding superfamily protein	ERF	GO:0006355 GO:0010200	regulation of transcription, DNA-dependent; response to chitin	GO:0003677 GO:0003700	DNA binding; sequence-specific DNA binding transcription factor activity	GO:0005634	nucleus
Glyma.02G007400	AT1G02360	Chitinase family protein		GO:0002679 GO:0005975 GO:0006865 GO:0010167 GO:0010200 GO:0015706 GO:0016998 GO:0050832	amino acid transport; carbohydrate metabolic process; cell wall macromolecule catabolic process; defense response to fungus; nitrate transport; respiratory burst involved in defense response; response to chitin; response to nitrate	GO:0004568	chitinase activity	GO:0005576	extracellular region
Glyma.02G009500	AT1G02450	NIM1-interacting 1		GO:0000165 GO:0001666 GO:0006355 GO:0006612 GO:0009595 GO:0009617 GO:0009697 GO:0009862 GO:0009867 GO:0010112 GO:0010200 GO:0010310 GO:0010363 GO:0016045 GO:0031347 GO:0031348 GO:0035304 GO:0042742 GO:0043900 GO:0045087 GO:0045088 GO:0045892 GO:0050776 GO:0050832	MAPK cascade; defense response to bacterium; defense response to fungus; detection of bacterium; detection of biotic stimulus; innate immune response; jasmonic acid mediated signaling pathway; negative regulation of defense response; negative regulation of transcription, DNA-dependent; protein targeting to membrane; regulation of defense response; regulation of hydrogen peroxide metabolic process…	GO:0005515	protein binding	GO:0005634	nucleus
Glyma.02G017100	AT4G02380	senescence-associated gene 21		GO:0000165 GO:0000302 GO:0006612 GO:0006979 GO:0007154 GO:0009409 GO:0009611 GO:0009738 GO:0009790 GO:0009862 GO:0009867 GO:0010363 GO:0016036 GO:0019375 GO:0030968 GO:0031348 GO:0042631 GO:0043069 GO:0050832	MAPK cascade; abscisic acid mediated signaling pathway; cell communication; cellular response to phosphate starvation; cellular response to water deprivation; defense response to fungus; embryo development; endoplasmic reticulum unfolded protein response; galactolipid biosynthetic process; jasmonic acid mediated signaling pathway; negative regulation of defense response; negative regulation of pr…	GO:0003674	molecular function	GO:0009507	chloroplast
Glyma.02G022200	AT1G69850	nitrate transporter 1:2		GO:0009624 GO:0010119 GO:0080168	abscisic acid transport; regulation of stomatal movement; response to nematode	GO:0005215 GO:0005509 GO:0090440	abscisic acid transporter activity; calcium ion binding; transporter activity	GO:0005886 GO:0016020	membrane; plasma membrane
Glyma.02G027400	AT1G59940	response regulator 3		GO:0000160 GO:0006355 GO:0007623 GO:0009735 GO:0009736 GO:0010114 GO:0010161 GO:0042752	circadian rhythm; cytokinin mediated signaling pathway; phosphorelay signal transduction system; red light signaling pathway; regulation of circadian rhythm; regulation of transcription, DNA-dependent; response to cytokinin stimulus; response to red light	GO:0000156	phosphorelay response regulator activity	GO:0005634 GO:0005737	cytoplasm; nucleus
Glyma.02G029900	AT1G24100	UDP-glucosyl transferase 74B1		GO:0006569 GO:0008152 GO:0009684 GO:0019761 GO:0042742 GO:0048767 GO:0052544	defense response by callose deposition in cell wall; defense response to bacterium; glucosinolate biosynthetic process; indoleacetic acid biosynthetic process; metabolic process; root hair elongation; tryptophan catabolic process	GO:0008194 GO:0016757 GO:0016758 GO:0047251	UDP-glycosyltransferase activity; thiohydroximate beta-D-glucosyltransferase activity; transferase activity, transferring glycosyl groups; transferase activity, transferring hexosyl groups	GO:0005634	nucleus
Glyma.02G037100	AT1G70520	cysteine-rich RLK (RECEPTOR-like protein kinase) 2		GO:0006457 GO:0006468 GO:0006857 GO:0009408 GO:0009644 GO:0010193 GO:0034976 GO:0042542 GO:0046777	oligopeptide transport; protein autophosphorylation; protein folding; protein phosphorylation; response to endoplasmic reticulum stress; response to heat; response to high light intensity; response to hydrogen peroxide; response to ozone	GO:0004672 GO:0004674 GO:0005524 GO:0016301 GO:0016772	ATP binding; kinase activity; protein kinase activity; protein serine/threonine kinase activity; transferase activity, transferring phosphorus-containing groups	GO:0005576 GO:0005886 GO:0009506	extracellular region; plasma membrane; plasmodesma
Glyma.02G037500	AT1G10740	alpha/beta-Hydrolases superfamily protein		GO:0006114	glycerol biosynthetic process	NA	NA	GO:0005576	extracellular region
Glyma.02G045100	AT2G17760	Eukaryotic aspartyl protease family protein		GO:0006508 GO:0006865	amino acid transport; proteolysis	GO:0004190	aspartic-type endopeptidase activity	GO:0031225	anchored to membrane
Glyma.02G070600	AT5G18270	Arabidopsis NAC domain containing protein 87	NAC	GO:0006355 GO:0007275	multicellular organismal development; regulation of transcription, DNA-dependent	GO:0003677 GO:0003700	DNA binding; sequence-specific DNA binding transcription factor activity	GO:0005634 GO:0005737	cytoplasm; nucleus
Glyma.02G072200	AT5G18170	glutamate dehydrogenase 1		GO:0006520 GO:0006807 GO:0009646 GO:0009651 GO:0046686 GO:0055114	cellular amino acid metabolic process; nitrogen compound metabolic process; oxidation-reduction process; response to absence of light; response to cadmium ion; response to salt stress	GO:0000166 GO:0004353 GO:0005507 GO:0005524 GO:0008270 GO:0016491 GO:0016639 GO:0050897	ATP binding; cobalt ion binding; copper ion binding; glutamate dehydrogenase [NAD(P)+] activity; nucleotide binding; oxidoreductase activity; oxidoreductase activity, acting on the CH-NH2 group of donors, NAD or NADP as acceptor; zinc ion binding	GO:0005739	mitochondrion
Glyma.02G072800	AT5G19790	related to AP2 11	ERF	GO:0000302 GO:0009723 GO:0035865 GO:0048528	cellular response to potassium ion; post-embryonic root development; response to ethylene stimulus; response to reactive oxygen species	GO:0003677 GO:0003700 GO:0043565	DNA binding; sequence-specific DNA binding; sequence-specific DNA binding transcription factor activity	GO:0005634	nucleus
Glyma.02G077600	AT1G34060	Pyridoxal phosphate (PLP)-dependent transferases superfamily protein		NA	NA	GO:0003824 GO:0016846 GO:0030170	carbon-sulfur lyase activity; catalytic activity; pyridoxal phosphate binding	GO:0005576	extracellular region
Glyma.02G088100	NA	NA		NA	NA	NA	NA	NA	NA
Glyma.02G095700	AT3G55240	Plant protein 1589 of unknown function		GO:0032502	developmental process	GO:0003674	molecular function	GO:0009507	chloroplast
Glyma.02G098800	AT1G25550	myb-like transcription factor family protein	G2-like	GO:0006355 GO:0010167 GO:0015706	nitrate transport; regulation of transcription, DNA-dependent; response to nitrate	GO:0003677 GO:0003700	DNA binding; sequence-specific DNA binding transcription factor activity	GO:0005634	nucleus
Glyma.02G107500	AT2G02960	RING/FYVE/PHD zinc finger superfamily protein		NA	NA	GO:0008270	zinc ion binding	GO:0005634	nucleus
Glyma.02G109100	AT1G69530	expansin A1		GO:0006949 GO:0009664 GO:0009739 GO:0009826 GO:0009828 GO:0010114 GO:0010119	plant-type cell wall loosening; plant-type cell wall organization; regulation of stomatal movement; response to gibberellin stimulus; response to red light; syncytium formation; unidimensional cell growth	NA	NA	GO:0005576 GO:0009505	extracellular region; plant-type cell wall
Glyma.02G114100	NA	NA		NA	NA	NA	NA	NA	NA
Glyma.02G129300	AT5G38560	Protein kinase superfamily protein		GO:0006468 GO:0051510	protein phosphorylation; regulation of unidimensional cell growth	GO:0004672 GO:0004674 GO:0005199 GO:0005524 GO:0016301 GO:0016772	ATP binding; kinase activity; protein kinase activity; protein serine/threonine kinase activity; structural constituent of cell wall; transferase activity, transferring phosphorus-containing groups	GO:0005886	plasma membrane
Glyma.02G130400	AT5G13930	Chalcone and stilbene synthase family protein		GO:0006979 GO:0008152 GO:0009058 GO:0009411 GO:0009611 GO:0009629 GO:0009715 GO:0009718 GO:0009733 GO:0009744 GO:0009753 GO:0009813 GO:0009926 GO:0010224 GO:0031540	anthocyanin-containing compound biosynthetic process; auxin polar transport; biosynthetic process; chalcone biosynthetic process; flavonoid biosynthetic process; metabolic process; regulation of anthocyanin biosynthetic process; response to UV; response to UV-B; response to auxin stimulus; response to gravity; response to jasmonic acid stimulus; response to oxidative stress; response to sucrose s…	GO:0003824 GO:0005515 GO:0016210 GO:0016746 GO:0016747	catalytic activity; naringenin-chalcone synthase activity; protein binding; transferase activity, transferring acyl groups; transferase activity, transferring acyl groups other than amino-acyl groups	GO:0005634 GO:0005737 GO:0005783 GO:0009705	cytoplasm; endoplasmic reticulum; nucleus; plant-type vacuole membrane
Glyma.02G132500	AT4G34410	redox responsive transcription factor 1	ERF	GO:0002679 GO:0006355 GO:0009693 GO:0010200 GO:0035556 GO:0050832	defense response to fungus; ethylene biosynthetic process; intracellular signal transduction; regulation of transcription, DNA-dependent; respiratory burst involved in defense response; response to chitin	GO:0003677 GO:0003700	DNA binding; sequence-specific DNA binding transcription factor activity	GO:0005634	nucleus
Glyma.02G134500	AT2G15760	Protein of unknown function (DUF1645)		GO:0008150 GO:0009693	biological process; ethylene biosynthetic process	GO:0005516	calmodulin binding	GO:0005634 GO:0005886	nucleus; plasma membrane
Glyma.02G136700	AT2G15890	maternal effect embryo arrest 14		GO:0009793 GO:0050832	defense response to fungus; embryo development ending in seed dormancy	GO:0003674	molecular function	GO:0005634 GO:0009507	chloroplast; nucleus
Glyma.02G140300	NA	NA		NA	NA	NA	NA	NA	NA
Glyma.02G151900	NA	NA		NA	NA	NA	NA	NA	NA
Glyma.02G156800	AT5G10530	Concanavalin A-like lectin protein kinase family protein		GO:0006468	protein phosphorylation	GO:0004672 GO:0004674 GO:0005524 GO:0016301 GO:0016772	ATP binding; kinase activity; protein kinase activity; protein serine/threonine kinase activity; transferase activity, transferring phosphorus-containing groups	GO:0005886	plasma membrane
Glyma.02G159200	AT3G55290	NAD(P)-binding Rossmann-fold superfamily protein		GO:0008152	metabolic process	GO:0000166 GO:0016491	nucleotide binding; oxidoreductase activity	GO:0005777	peroxisome
Glyma.02G195300	AT3G11820	syntaxin of plants 121		GO:0000165 GO:0002679 GO:0006355 GO:0006612 GO:0006820 GO:0006862 GO:0006886 GO:0006888 GO:0006944 GO:0006952 GO:0007154 GO:0007165 GO:0009409 GO:0009414 GO:0009595 GO:0009611 GO:0009617 GO:0009620 GO:0009625 GO:0009697 GO:0009723 GO:0009733 GO:0009737 GO:0009738 GO:0009753 GO:0009862 GO:0009863 GO:0009867 GO:0009963 GO:0010119 GO:0010148 GO:0010200 GO:0010310 GO:0010363 GO:0015696 GO:0015802 GO:…	ER to Golgi vesicle-mediated transport; MAPK cascade; abscisic acid mediated signaling pathway; amino acid import; ammonium transport; anion transport; basic amino acid transport; cell communication; cellular membrane fusion; defense response; defense response to bacterium; defense response to fungus; detection of biotic stimulus; endoplasmic reticulum unfolded protein response; hyperosmotic sali…	GO:0005484 GO:0005515 GO:0043495	SNAP receptor activity; protein anchor; protein binding	GO:0005802 GO:0005886 GO:0009504 GO:0009506 GO:0031201	SNARE complex; cell plate; plasma membrane; plasmodesma; trans-Golgi network
Glyma.02G195500	AT2G35920	RNA helicase family protein		GO:0006499	N-terminal protein myristoylation	GO:0003676 GO:0004386 GO:0005524 GO:0008026	ATP-dependent helicase activity; ATP binding; helicase activity; nucleic acid binding	GO:0005737	cytoplasm
Glyma.02G198300	AT5G06300	Putative lysine decarboxylase family protein		GO:0006826 GO:0008152 GO:0009733 GO:0009741 GO:0010106 GO:0010167 GO:0015706	cellular response to iron ion starvation; iron ion transport; metabolic process; nitrate transport; response to auxin stimulus; response to brassinosteroid stimulus; response to nitrate	GO:0016831	carboxy-lyase activity	GO:0005634 GO:0005829	cytosol; nucleus
Glyma.02G208200	AT4G08950	Phosphate-responsive 1 family protein		GO:0009741 GO:0016126	response to brassinosteroid stimulus; sterol biosynthetic process	GO:0003674	molecular function	GO:0005576 GO:0005618 GO:0005794 GO:0009505	Golgi apparatus; cell wall; extracellular region; plant-type cell wall
Glyma.02G210000	AT2G14095	NA		GO:0008150	biological process	GO:0003674	molecular function	NA	NA
Glyma.02G210300	AT2G14095	NA		GO:0008150	biological process	GO:0003674	molecular function	NA	NA
Glyma.02G211600	AT4G24380	INVOLVED IN: 10-formyltetrahydrofolate biosynthetic process, folic acid and derivative biosynthetic process; EX		GO:0009257 GO:0009396 GO:0009611 GO:0009620 GO:0009693 GO:0009695 GO:0009753 GO:0015824	10-formyltetrahydrofolate biosynthetic process; ethylene biosynthetic process; folic acid-containing compound biosynthetic process; jasmonic acid biosynthetic process; proline transport; response to fungus; response to jasmonic acid stimulus; response to wounding	NA	NA	GO:0009507	chloroplast
Glyma.02G217900	AT5G65660	hydroxyproline-rich glycoprotein family protein		GO:0008150	biological process	GO:0003674	molecular function	GO:0005634 GO:0005886	nucleus; plasma membrane
Glyma.02G219700	AT3G10870	methyl esterase 17		GO:0033473 GO:0048367	indoleacetic acid conjugate metabolic process; shoot system development	GO:0016787 GO:0016788 GO:0080030	hydrolase activity; hydrolase activity, acting on ester bonds; methyl indole-3-acetate esterase activity	GO:0005737	cytoplasm
Glyma.02G221000	AT5G24610	NA		GO:0008150	biological process	GO:0003674	molecular function	GO:0005575	cellular component
Glyma.02G222800	NA	NA		NA	NA	NA	NA	NA	NA
Glyma.02G232000	AT5G58430	exocyst subunit exo70 family protein B1		GO:0006887 GO:0006904 GO:0009738 GO:0035556	abscisic acid mediated signaling pathway; exocytosis; intracellular signal transduction; vesicle docking involved in exocytosis	NA	NA	GO:0000145 GO:0005623 GO:0005737 GO:0005829 GO:0005886 GO:0070062	cell; cytoplasm; cytosol; exocyst; extracellular vesicular exosome; plasma membrane
Glyma.02G232500	AT1G06980	NA		GO:0008150	biological process	GO:0003674	molecular function	NA	NA
Glyma.02G234200	AT5G58400	Peroxidase superfamily protein		GO:0006979 GO:0055114	oxidation-reduction process; response to oxidative stress	GO:0004601 GO:0020037	heme binding; peroxidase activity	GO:0005576	extracellular region
Glyma.02G234300	AT2G23140	RING/U-box superfamily protein with ARM repeat domain		GO:0016567	protein ubiquitination	GO:0004842 GO:0019894	kinesin binding; ubiquitin-protein ligase activity	GO:0000151 GO:0005634 GO:0005871	kinesin complex; nucleus; ubiquitin ligase complex
Glyma.02G235700	AT5G58350	with no lysine (K) kinase 4		GO:0006468 GO:0010260 GO:0016036 GO:0019375 GO:0042631 GO:0046777	cellular response to phosphate starvation; cellular response to water deprivation; galactolipid biosynthetic process; organ senescence; protein autophosphorylation; protein phosphorylation	GO:0004672 GO:0004674 GO:0005524 GO:0016301 GO:0016772	ATP binding; kinase activity; protein kinase activity; protein serine/threonine kinase activity; transferase activity, transferring phosphorus-containing groups	GO:0005634 GO:0005737	cytoplasm; nucleus
Glyma.02G238500	AT1G57610	Protein of unknown function (DUF607)		GO:0008150	biological process	GO:0003674	molecular function	GO:0005575	cellular component
Glyma.02G255200	AT1G07280	Tetratricopeptide repeat (TPR)-like superfamily protein		GO:0000023 GO:0008150 GO:0019252	biological process; maltose metabolic process; starch biosynthetic process	NA	NA	NA	NA
Glyma.02G255400	AT2G40000	ortholog of sugar beet HS1 PRO-1 2		GO:0006979 GO:0009646 GO:0009751 GO:0009816 GO:0010200	defense response to bacterium, incompatible interaction; response to absence of light; response to chitin; response to oxidative stress; response to salicylic acid stimulus	GO:0005515	protein binding	GO:0005739	mitochondrion
Glyma.02G256000	AT5G05740	ethylene-dependent gravitropism-deficient and yellow-green-like 2		GO:0006508 GO:0006655 GO:0009793 GO:0010027 GO:0010103 GO:0010228 GO:0016226 GO:0019288 GO:0048481	embryo development ending in seed dormancy; iron-sulfur cluster assembly; isopentenyl diphosphate biosynthetic process, mevalonate-independent pathway; ovule development; phosphatidylglycerol biosynthetic process; proteolysis; stomatal complex morphogenesis; thylakoid membrane organization; vegetative to reproductive phase transition of meristem	GO:0004222	metalloendopeptidase activity	GO:0009507 GO:0009535	chloroplast; chloroplast thylakoid membrane
Glyma.02G257300	AT3G55950	CRINKLY4 related 3		GO:0006468 GO:0006612 GO:0006944 GO:0009723 GO:0009738 GO:0010363 GO:0035556 GO:0043069	abscisic acid mediated signaling pathway; cellular membrane fusion; intracellular signal transduction; negative regulation of programmed cell death; protein phosphorylation; protein targeting to membrane; regulation of plant-type hypersensitive response; response to ethylene stimulus	GO:0004672 GO:0004674 GO:0005524 GO:0016301 GO:0016772 GO:0042803	ATP binding; kinase activity; protein homodimerization activity; protein kinase activity; protein serine/threonine kinase activity; transferase activity, transferring phosphorus-containing groups	GO:0005886	plasma membrane
Glyma.02G257700	AT3G11180	2-oxoglutarate (2OG) and Fe(II)-dependent oxygenase superfamily protein		GO:0055114	oxidation-reduction process	GO:0005506 GO:0016491 GO:0016706	iron ion binding; oxidoreductase activity; oxidoreductase activity, acting on paired donors, with incorporation or reduction of molecular oxygen, 2-oxoglutarate as one donor, and incorporation of one atom each of oxygen into both donors	GO:0005737	cytoplasm
Glyma.02G269000	AT2G05790	O-Glycosyl hydrolases family 17 protein		GO:0005975 GO:0007389 GO:0008356 GO:0008361 GO:0009926 GO:0010015 GO:0010075 GO:0040007	asymmetric cell division; auxin polar transport; carbohydrate metabolic process; growth; pattern specification process; regulation of cell size; regulation of meristem growth; root morphogenesis	GO:0003824 GO:0004553 GO:0043169	catalytic activity; cation binding; hydrolase activity, hydrolyzing O-glycosyl compounds	GO:0005886	plasma membrane
Glyma.02G275900	AT2G26980	CBL-interacting protein kinase 3		GO:0006468 GO:0007165 GO:0009735 GO:0009737 GO:0009738 GO:0009845	abscisic acid mediated signaling pathway; protein phosphorylation; response to abscisic acid stimulus; response to cytokinin stimulus; seed germination; signal transduction	GO:0004672 GO:0004674 GO:0004713 GO:0005524 GO:0016301 GO:0016772	ATP binding; kinase activity; protein kinase activity; protein serine/threonine kinase activity; protein tyrosine kinase activity; transferase activity, transferring phosphorus-containing groups	GO:0005634 GO:0005737 GO:0005886	cytoplasm; nucleus; plasma membrane
Glyma.02G279600	AT5G13500	NA		GO:0008150	biological process	GO:0016757	transferase activity, transferring glycosyl groups	GO:0005768 GO:0005794 GO:0005802	Golgi apparatus; endosome; trans-Golgi network
Glyma.02G288600	AT1G07650	Leucine-rich repeat transmembrane protein kinase		GO:0006468 GO:0007169	protein phosphorylation; transmembrane receptor protein tyrosine kinase signaling pathway	GO:0004672 GO:0004674 GO:0004713 GO:0005524 GO:0016301 GO:0016772	ATP binding; kinase activity; protein kinase activity; protein serine/threonine kinase activity; protein tyrosine kinase activity; transferase activity, transferring phosphorus-containing groups	GO:0005886	plasma membrane
Glyma.02G291800	AT4G26980	RNI-like superfamily protein		GO:0008150 GO:0009644 GO:0042542	biological process; response to high light intensity; response to hydrogen peroxide	GO:0003674	molecular function	GO:0005634	nucleus
Glyma.02G292100	NA	NA		NA	NA	NA	NA	NA	NA
Glyma.02G293900	AT2G32990	glycosyl hydrolase 9B8		GO:0005975	carbohydrate metabolic process	GO:0003824 GO:0004553	catalytic activity; hydrolase activity, hydrolyzing O-glycosyl compounds	GO:0005576	extracellular region
Glyma.02G297700	AT1G50600	scarecrow-like 5	GRAS	GO:0006355	regulation of transcription, DNA-dependent	GO:0003700	sequence-specific DNA binding transcription factor activity	GO:0005634 GO:0005829	cytosol; nucleus
Glyma.02G309000	AT2G04515	NA		GO:0008150	biological process	GO:0003674	molecular function	GO:0009507	chloroplast
Glyma.02G310100	AT1G30135	jasmonate-zim-domain protein 8		GO:0008150 GO:0009611 GO:0009620 GO:0009693 GO:0009695 GO:0009753 GO:0009867	biological process; ethylene biosynthetic process; jasmonic acid biosynthetic process; jasmonic acid mediated signaling pathway; response to fungus; response to jasmonic acid stimulus; response to wounding	GO:0005515	protein binding	GO:0005634	nucleus
Glyma.03G007700	AT4G26010	Peroxidase superfamily protein		GO:0006826 GO:0006979 GO:0010054 GO:0010106 GO:0010167 GO:0015706 GO:0055114	cellular response to iron ion starvation; iron ion transport; nitrate transport; oxidation-reduction process; response to nitrate; response to oxidative stress; trichoblast differentiation	GO:0004601 GO:0020037	heme binding; peroxidase activity	GO:0005576	extracellular region
Glyma.03G023900	AT3G60810	NA		GO:0008150	biological process	GO:0003674	molecular function	GO:0005575	cellular component
Glyma.03G041000	AT5G01750	Protein of unknown function (DUF567)		GO:0006569 GO:0006995 GO:0008150 GO:0009684 GO:0030003 GO:0070838	biological process; cellular cation homeostasis; cellular response to nitrogen starvation; divalent metal ion transport; indoleacetic acid biosynthetic process; tryptophan catabolic process	GO:0003674	molecular function	GO:0009507	chloroplast
Glyma.03G056800	AT5G01370	ALC-interacting protein 1		GO:0010047	fruit dehiscence	GO:0005515	protein binding	GO:0005634	nucleus
Glyma.03G057100	AT5G05600	2-oxoglutarate (2OG) and Fe(II)-dependent oxygenase superfamily protein		GO:0009611 GO:0009620 GO:0009695 GO:0009753 GO:0009867 GO:0055114 GO:0080167	jasmonic acid biosynthetic process; jasmonic acid mediated signaling pathway; oxidation-reduction process; response to fungus; response to jasmonic acid stimulus; response to karrikin; response to wounding	GO:0005506 GO:0016491 GO:0016706	iron ion binding; oxidoreductase activity; oxidoreductase activity, acting on paired donors, with incorporation or reduction of molecular oxygen, 2-oxoglutarate as one donor, and incorporation of one atom each of oxygen into both donors	GO:0005737	cytoplasm
Glyma.03G068200	AT1G73330	drought-repressed 4		GO:0009414	response to water deprivation	GO:0004866 GO:0030414	endopeptidase inhibitor activity; peptidase inhibitor activity	GO:0005576	extracellular region
Glyma.03G075300	AT5G36930	Disease resistance protein (TIR-NBS-LRR class) family		GO:0006952 GO:0007165	defense response; signal transduction	GO:0043531	ADP binding	GO:0005622 GO:0005737	cytoplasm; intracellular
Glyma.03G078200	AT5G01210	HXXXD-type acyl-transferase family protein		NA	NA	GO:0016740 GO:0016747	transferase activity; transferase activity, transferring acyl groups other than amino-acyl groups	GO:0005737	cytoplasm
Glyma.03G088800	AT3G25250	AGC (cAMP-dependent, cGMP-dependent and protein kinase C) kinase family protein		GO:0006468 GO:0006979 GO:0009611 GO:0010200	protein phosphorylation; response to chitin; response to oxidative stress; response to wounding	GO:0004672 GO:0004674 GO:0005515 GO:0005524 GO:0016301 GO:0016772 GO:0019901	ATP binding; kinase activity; protein binding; protein kinase activity; protein kinase binding; protein serine/threonine kinase activity; transferase activity, transferring phosphorus-containing groups	NA	NA
Glyma.03G093600	AT4G02600	Seven transmembrane MLO family protein		GO:0006952 GO:0008219	cell death; defense response	GO:0005516	calmodulin binding	GO:0005886 GO:0016021	integral to membrane; plasma membrane
Glyma.03G096200	AT3G49750	receptor like protein 44		GO:0007165	signal transduction	NA	NA	GO:0005886	plasma membrane
Glyma.03G098600	AT5G16970	alkenal reductase		GO:0006865 GO:0006979 GO:0009407 GO:0010583 GO:0015824 GO:0046686	amino acid transport; proline transport; response to cadmium ion; response to cyclopentenone; response to oxidative stress; toxin catabolic process	GO:0000166 GO:0008270 GO:0016491 GO:0016747 GO:0032440	2-alkenal reductase [NAD(P)] activity; nucleotide binding; oxidoreductase activity; transferase activity, transferring acyl groups other than amino-acyl groups; zinc ion binding	GO:0005634 GO:0005737 GO:0005829	cytoplasm; cytosol; nucleus
Glyma.03G113200	AT3G51680	NAD(P)-binding Rossmann-fold superfamily protein		GO:0008152	metabolic process	GO:0000166 GO:0016491	nucleotide binding; oxidoreductase activity	GO:0005737	cytoplasm
Glyma.03G124700	AT5G05140	Transcription elongation factor (TFIIS) family protein		GO:0006351 GO:0006355 GO:0009611 GO:0009620 GO:0009695 GO:0009753 GO:0010200	jasmonic acid biosynthetic process; regulation of transcription, DNA-dependent; response to chitin; response to fungus; response to jasmonic acid stimulus; response to wounding; transcription, DNA-dependent	GO:0003677	DNA binding	GO:0005634 GO:0016021	integral to membrane; nucleus
Glyma.03G132900	AT3G57270	beta-1,3-glucanase 1		GO:0005975	carbohydrate metabolic process	GO:0003824 GO:0004553 GO:0043169	catalytic activity; cation binding; hydrolase activity, hydrolyzing O-glycosyl compounds	GO:0005576	extracellular region
Glyma.03G157800	AT3G22930	calmodulin-like 11		GO:0008150 GO:0030048 GO:0051645 GO:0051646 GO:0060151	Golgi localization; actin filament-based movement; biological process; mitochondrion localization; peroxisome localization	GO:0005509	calcium ion binding	NA	NA
Glyma.03G159000	AT2G30550	alpha/beta-Hydrolases superfamily protein		GO:0006612 GO:0006629 GO:0009697 GO:0009863 GO:0009867 GO:0010363 GO:0016036 GO:0019375 GO:0031348 GO:0042631 GO:0045087	cellular response to phosphate starvation; cellular response to water deprivation; galactolipid biosynthetic process; innate immune response; jasmonic acid mediated signaling pathway; lipid metabolic process; negative regulation of defense response; protein targeting to membrane; regulation of plant-type hypersensitive response; salicylic acid biosynthetic process; salicylic acid mediated signali…	GO:0004806 GO:0008970 GO:0047714	galactolipase activity; phosphatidylcholine 1-acylhydrolase activity; triglyceride lipase activity	GO:0009507	chloroplast
Glyma.03G165800	AT4G08850	Leucine-rich repeat receptor-like protein kinase family protein		GO:0006468 GO:0006857 GO:0006995 GO:0009627 GO:0031347	cellular response to nitrogen starvation; oligopeptide transport; protein phosphorylation; regulation of defense response; systemic acquired resistance	GO:0004672 GO:0004713 GO:0005524 GO:0016301 GO:0016772	ATP binding; kinase activity; protein kinase activity; protein tyrosine kinase activity; transferase activity, transferring phosphorus-containing groups	GO:0005634 GO:0005886 GO:0009506 GO:0016020	membrane; nucleus; plasma membrane; plasmodesma
Glyma.03G168900	AT3G04300	RmlC-like cupins superfamily protein		GO:0008150	biological process	GO:0003674	molecular function	GO:0009507	chloroplast
Glyma.03G169200	AT2G20300	Protein kinase superfamily protein		GO:0006468 GO:0009664 GO:0009965 GO:0010068 GO:0042335 GO:0042545 GO:0046777 GO:0048367 GO:0048645	cell wall modification; cuticle development; leaf morphogenesis; organ formation; plant-type cell wall organization; protein autophosphorylation; protein phosphorylation; protoderm histogenesis; shoot system development	GO:0004672 GO:0004674 GO:0005524 GO:0016301 GO:0016772	ATP binding; kinase activity; protein kinase activity; protein serine/threonine kinase activity; transferase activity, transferring phosphorus-containing groups	GO:0005886	plasma membrane
Glyma.03G176300	AT5G02790	Glutathione S-transferase family protein		GO:0019344 GO:0019761 GO:0042744 GO:0046686	cysteine biosynthetic process; glucosinolate biosynthetic process; hydrogen peroxide catabolic process; response to cadmium ion	NA	NA	GO:0005737 GO:0005829	cytoplasm; cytosol
Glyma.03G196300	AT3G10120	NA		GO:0008150	biological process	GO:0003674	molecular function	GO:0005634	nucleus
Glyma.03G199800	AT3G11600	NA		GO:0080167	response to karrikin	GO:0003674	molecular function	GO:0005634	nucleus
Glyma.03G204100	AT3G10660	calmodulin-domain protein kinase cdpk isoform 2		GO:0006468 GO:0006499	N-terminal protein myristoylation; protein phosphorylation	GO:0004672 GO:0004674 GO:0004683 GO:0005509 GO:0005524 GO:0016301 GO:0016772	ATP binding; calcium ion binding; calmodulin-dependent protein kinase activity; kinase activity; protein kinase activity; protein serine/threonine kinase activity; transferase activity, transferring phosphorus-containing groups	GO:0005634 GO:0005789	endoplasmic reticulum membrane; nucleus
Glyma.03G213500	AT2G44750	thiamin pyrophosphokinase 2		GO:0006772 GO:0009229	thiamine diphosphate biosynthetic process; thiamine metabolic process	GO:0004788 GO:0005524	ATP binding; thiamine diphosphokinase activity	GO:0005737 GO:0005829	cytoplasm; cytosol
Glyma.03G215000	AT1G02820	Late embryogenesis abundant 3 (LEA3) family protein		GO:0009790	embryo development	GO:0003674	molecular function	GO:0009507	chloroplast
Glyma.03G217300	AT3G05700	Drought-responsive family protein		GO:0009414	response to water deprivation	NA	NA	GO:0005634	nucleus
Glyma.03G218600	AT4G02100	Heat shock protein DnaJ with tetratricopeptide repeat		GO:0006457	protein folding	GO:0031072	heat shock protein binding	GO:0005634	nucleus
Glyma.03G226200	AT3G62010	NA		NA	NA	NA	NA	GO:0005634 GO:0005829	cytosol; nucleus
Glyma.03G232400	AT5G57580	Calmodulin-binding protein		GO:0006487 GO:0008150	biological process; protein N-linked glycosylation	GO:0005516	calmodulin binding	GO:0005634	nucleus
Glyma.03G232500	AT5G57580	Calmodulin-binding protein		GO:0006487 GO:0008150	biological process; protein N-linked glycosylation	GO:0005516	calmodulin binding	GO:0005634	nucleus
Glyma.03G236300	AT1G09090	respiratory burst oxidase homolog B		GO:0006826 GO:0006952 GO:0009408 GO:0009845 GO:0010106 GO:0010167 GO:0015706 GO:0055114	cellular response to iron ion starvation; defense response; iron ion transport; nitrate transport; oxidation-reduction process; response to heat; response to nitrate; seed germination	GO:0004601 GO:0005506 GO:0005509 GO:0009055 GO:0016174 GO:0016491 GO:0050660 GO:0050664	NAD(P)H oxidase activity; calcium ion binding; electron carrier activity; flavin adenine dinucleotide binding; iron ion binding; oxidoreductase activity; oxidoreductase activity, acting on NAD(P)H, oxygen as acceptor; peroxidase activity	GO:0005886 GO:0016020 GO:0016021	integral to membrane; membrane; plasma membrane
Glyma.03G237900	AT3G05345	Chaperone DnaJ-domain superfamily protein		GO:0008150	biological process	GO:0031072	heat shock protein binding	NA	NA
Glyma.03G241600	AT3G05140	ROP binding protein kinases 2		GO:0006468	protein phosphorylation	GO:0004672 GO:0004674 GO:0005524 GO:0016301 GO:0016772 GO:0051020	ATP binding; GTPase binding; kinase activity; protein kinase activity; protein serine/threonine kinase activity; transferase activity, transferring phosphorus-containing groups	GO:0005634 GO:0005737	cytoplasm; nucleus
Glyma.03G254900	AT4G01130	GDSL-like Lipase/Acylhydrolase superfamily protein		GO:0006629	lipid metabolic process	GO:0004091 GO:0016788	carboxylesterase activity; hydrolase activity, acting on ester bonds	GO:0005576	extracellular region
Glyma.03G261400	AT4G01410	Late embryogenesis abundant (LEA) hydroxyproline-rich glycoprotein family		GO:0008150	biological process	GO:0003674	molecular function	GO:0005886 GO:0009506	plasma membrane; plasmodesma
Glyma.04G003300	AT2G47140	NAD(P)-binding Rossmann-fold superfamily protein		GO:0008152	metabolic process	GO:0000166 GO:0016491	nucleotide binding; oxidoreductase activity	GO:0005737	cytoplasm
Glyma.04G007700	AT4G34710	arginine decarboxylase 2		GO:0006527 GO:0006596 GO:0006612 GO:0006970 GO:0006979 GO:0007165 GO:0008295 GO:0009409 GO:0009414 GO:0009446 GO:0009611 GO:0009620 GO:0009651 GO:0009695 GO:0009723 GO:0009733 GO:0009737 GO:0009738 GO:0009753 GO:0009793 GO:0009863 GO:0009867 GO:0010363 GO:0042538 GO:0048316 GO:0080167	abscisic acid mediated signaling pathway; arginine catabolic process; embryo development ending in seed dormancy; hyperosmotic salinity response; jasmonic acid biosynthetic process; jasmonic acid mediated signaling pathway; polyamine biosynthetic process; protein targeting to membrane; putrescine biosynthetic process; regulation of plant-type hypersensitive response; response to abscisic acid sti…	GO:0003824 GO:0008792	arginine decarboxylase activity; catalytic activity	GO:0005634	nucleus
Glyma.04G021200	AT5G42200	RING/U-box superfamily protein		GO:0016567	protein ubiquitination	GO:0004842 GO:0008270	ubiquitin-protein ligase activity; zinc ion binding	NA	NA
Glyma.04G023800	AT1G30755	Protein of unknown function (DUF668)		GO:0008150	biological process	NA	NA	GO:0005634	nucleus
Glyma.04G026400	AT1G75620	glyoxal oxidase-related protein		GO:0008150 GO:0010413 GO:0045492	biological process; glucuronoxylan metabolic process; xylan biosynthetic process	GO:0003674	molecular function	GO:0005576	extracellular region
Glyma.04G029600	AT1G75390	basic leucine-zipper 44	bZIP	GO:0006355 GO:0009410 GO:0009845 GO:0030968	endoplasmic reticulum unfolded protein response; regulation of transcription, DNA-dependent; response to xenobiotic stimulus; seed germination	GO:0003677 GO:0003700 GO:0043565 GO:0046982	DNA binding; protein heterodimerization activity; sequence-specific DNA binding; sequence-specific DNA binding transcription factor activity	GO:0005634	nucleus
Glyma.04G036300	AT5G66850	mitogen-activated protein kinase kinase kinase 5		GO:0006468 GO:0046777	protein autophosphorylation; protein phosphorylation	GO:0004672 GO:0004674 GO:0005524 GO:0016301 GO:0016772	ATP binding; kinase activity; protein kinase activity; protein serine/threonine kinase activity; transferase activity, transferring phosphorus-containing groups	GO:0005886	plasma membrane
Glyma.04G040000	AT5G42830	HXXXD-type acyl-transferase family protein		NA	NA	GO:0016740 GO:0016747	transferase activity; transferase activity, transferring acyl groups other than amino-acyl groups	GO:0005737 GO:0005829	cytoplasm; cytosol
Glyma.04G043100	NA	NA		NA	NA	NA	NA	NA	NA
Glyma.04G056100	AT5G21930	P-type ATPase of Arabidopsis 2		GO:0006754 GO:0006812 GO:0006825 GO:0008152 GO:0009767 GO:0030001 GO:0046034	ATP biosynthetic process; ATP metabolic process; cation transport; copper ion transport; metabolic process; metal ion transport; photosynthetic electron transport chain	GO:0000166 GO:0003824 GO:0005375 GO:0005524 GO:0015662 GO:0016820 GO:0043682 GO:0046872	ATP binding; ATPase activity, coupled to transmembrane movement of ions, phosphorylative mechanism; catalytic activity; copper-transporting ATPase activity; copper ion transmembrane transporter activity; hydrolase activity, acting on acid anhydrides, catalyzing transmembrane movement of substances; metal ion binding; nucleotide binding	GO:0005886 GO:0009535 GO:0016020 GO:0016021	chloroplast thylakoid membrane; integral to membrane; membrane; plasma membrane
Glyma.04G069500	AT1G15460	HCO3- transporter family		GO:0006820 GO:0046713 GO:0080029	anion transport; borate transport; cellular response to boron-containing substance levels	GO:0005452 GO:0015301 GO:0080139	anion:anion antiporter activity; borate efflux transmembrane transporter activity; inorganic anion exchanger activity	GO:0005886 GO:0016020 GO:0016021	integral to membrane; membrane; plasma membrane
Glyma.04G074000	AT4G31140	O-Glycosyl hydrolases family 17 protein		GO:0005975	carbohydrate metabolic process	GO:0003824 GO:0004553 GO:0043169	catalytic activity; cation binding; hydrolase activity, hydrolyzing O-glycosyl compounds	GO:0005773 GO:0005886 GO:0009505 GO:0009506 GO:0031225 GO:0046658	anchored to membrane; anchored to plasma membrane; plant-type cell wall; plasma membrane; plasmodesma; vacuole
Glyma.04G074800	AT5G24860	flowering promoting factor 1		GO:0009739 GO:0009911 GO:0010228	positive regulation of flower development; response to gibberellin stimulus; vegetative to reproductive phase transition of meristem	GO:0003674	molecular function	GO:0005634	nucleus
Glyma.04G077300	AT4G31290	ChaC-like family protein		GO:0008150	biological process	GO:0003674	molecular function	GO:0005737	cytoplasm
Glyma.04G079300	AT2G25735	NA		GO:0002237 GO:0002679 GO:0006979 GO:0008150 GO:0009611 GO:0010200 GO:0030968 GO:0035556 GO:0050832	biological process; defense response to fungus; endoplasmic reticulum unfolded protein response; intracellular signal transduction; respiratory burst involved in defense response; response to chitin; response to molecule of bacterial origin; response to oxidative stress; response to wounding	GO:0003674	molecular function	GO:0005739 GO:0005886	mitochondrion; plasma membrane
Glyma.04G080300	AT2G25737	Sulfite exporter TauE/SafE family protein		NA	NA	NA	NA	GO:0009507 GO:0016021	chloroplast; integral to membrane
Glyma.04G082800	NA	NA		NA	NA	NA	NA	NA	NA
Glyma.04G082900	AT4G28860	casein kinase I-like 4		GO:0006468 GO:0046777	protein autophosphorylation; protein phosphorylation	GO:0004672 GO:0004674 GO:0005524 GO:0016301 GO:0016772	ATP binding; kinase activity; protein kinase activity; protein serine/threonine kinase activity; transferase activity, transferring phosphorus-containing groups	GO:0005634 GO:0005737	cytoplasm; nucleus
Glyma.04G086300	AT5G25880	NADP-malic enzyme 3		GO:0006094 GO:0006108 GO:0006499 GO:0007010 GO:0009827 GO:0009860 GO:0010498 GO:0051260 GO:0055114	N-terminal protein myristoylation; cytoskeleton organization; gluconeogenesis; malate metabolic process; oxidation-reduction process; plant-type cell wall modification; pollen tube growth; proteasomal protein catabolic process; protein homooligomerization	GO:0000166 GO:0004470 GO:0004473 GO:0016491 GO:0016616 GO:0016619 GO:0016652 GO:0046872 GO:0051287	NAD binding; malate dehydrogenase (oxaloacetate-decarboxylating) (NADP+) activity; malate dehydrogenase (oxaloacetate-decarboxylating) activity; malic enzyme activity; metal ion binding; nucleotide binding; oxidoreductase activity; oxidoreductase activity, acting on NAD(P)H, NAD(P) as acceptor; oxidoreductase activity, acting on the CH-OH group of donors, NAD or NADP as acceptor	GO:0005829 GO:0009507	chloroplast; cytosol
Glyma.04G093200	AT1G28390	Protein kinase superfamily protein		GO:0006468 GO:0006857	oligopeptide transport; protein phosphorylation	GO:0004672 GO:0004674 GO:0004713 GO:0005524 GO:0016301 GO:0016772	ATP binding; kinase activity; protein kinase activity; protein serine/threonine kinase activity; protein tyrosine kinase activity; transferase activity, transferring phosphorus-containing groups	GO:0005886	plasma membrane
Glyma.04G098600	AT4G09040	RNA-binding (RRM/RBD/RNP motifs) family protein		GO:0000398 GO:0008150	biological process; mRNA splicing, via spliceosome	GO:0000166 GO:0003676 GO:0003723	RNA binding; nucleic acid binding; nucleotide binding	GO:0005634 GO:0009507 GO:0009570	chloroplast; chloroplast stroma; nucleus
Glyma.04G099000	NA	NA		NA	NA	NA	NA	NA	NA
Glyma.04G100400	AT4G08950	Phosphate-responsive 1 family protein		GO:0009741 GO:0016126	response to brassinosteroid stimulus; sterol biosynthetic process	GO:0003674	molecular function	GO:0005576 GO:0005618 GO:0005794 GO:0009505	Golgi apparatus; cell wall; extracellular region; plant-type cell wall
Glyma.04G108500	AT1G53540	HSP20-like chaperones superfamily protein		GO:0006457 GO:0009408 GO:0009644 GO:0034976 GO:0042542	protein folding; response to endoplasmic reticulum stress; response to heat; response to high light intensity; response to hydrogen peroxide	NA	NA	GO:0005737	cytoplasm
Glyma.04G127100	AT4G23180	cysteine-rich RLK (RECEPTOR-like protein kinase) 10		GO:0006468 GO:0006995	cellular response to nitrogen starvation; protein phosphorylation	GO:0004672 GO:0004674 GO:0004713 GO:0005524 GO:0016301 GO:0016772	ATP binding; kinase activity; protein kinase activity; protein serine/threonine kinase activity; protein tyrosine kinase activity; transferase activity, transferring phosphorus-containing groups	GO:0005886	plasma membrane
Glyma.04G149300	AT2G26640	3-ketoacyl-CoA synthase 11		GO:0006084 GO:0006633 GO:0006816 GO:0007030 GO:0008152 GO:0008610 GO:0009409 GO:0009416 GO:0009651 GO:0009832 GO:0016049 GO:0016126 GO:0016132 GO:0030243	Golgi organization; acetyl-CoA metabolic process; brassinosteroid biosynthetic process; calcium ion transport; cell growth; cellulose metabolic process; fatty acid biosynthetic process; lipid biosynthetic process; metabolic process; plant-type cell wall biogenesis; response to cold; response to light stimulus; response to salt stress; sterol biosynthetic process	GO:0003824 GO:0016747	catalytic activity; transferase activity, transferring acyl groups other than amino-acyl groups	GO:0005634 GO:0016020	membrane; nucleus
Glyma.04G168300	AT3G47500	cycling DOF factor 3	Dof	GO:0006355	regulation of transcription, DNA-dependent	GO:0003677 GO:0003700 GO:0005515 GO:0008270	DNA binding; protein binding; sequence-specific DNA binding transcription factor activity; zinc ion binding	GO:0005634	nucleus
Glyma.04G174600	AT2G47140	NAD(P)-binding Rossmann-fold superfamily protein		GO:0008152	metabolic process	GO:0000166 GO:0016491	nucleotide binding; oxidoreductase activity	GO:0005737	cytoplasm
Glyma.04G182600	AT4G20970	basic helix-loop-helix (bHLH) DNA-binding superfamily protein	bHLH	GO:0006355 GO:0050832	defense response to fungus; regulation of transcription, DNA-dependent	GO:0003677 GO:0003700	DNA binding; sequence-specific DNA binding transcription factor activity	GO:0005634	nucleus
Glyma.04G198400	AT5G50800	Nodulin MtN3 family protein		GO:0015770	sucrose transport	GO:0008515 GO:0051119	sucrose transmembrane transporter activity; sugar transmembrane transporter activity	GO:0005886 GO:0005887 GO:0016020 GO:0016021	integral to membrane; integral to plasma membrane; membrane; plasma membrane
Glyma.04G208300	AT1G01720	NAC (No Apical Meristem) domain transcriptional regulator superfamily protein	NAC	GO:0006355 GO:0007275 GO:0009414 GO:0009611 GO:0009620 GO:0009695 GO:0009737 GO:0009753 GO:0009788 GO:0010200 GO:0042538	hyperosmotic salinity response; jasmonic acid biosynthetic process; multicellular organismal development; negative regulation of abscisic acid mediated signaling pathway; regulation of transcription, DNA-dependent; response to abscisic acid stimulus; response to chitin; response to fungus; response to jasmonic acid stimulus; response to water deprivation; response to wounding	GO:0003677 GO:0003700	DNA binding; sequence-specific DNA binding transcription factor activity	GO:0005634	nucleus
Glyma.04G209200	AT5G09220	amino acid permease 2		GO:0006612 GO:0006833 GO:0006865 GO:0009651 GO:0009750 GO:0009963 GO:0010363 GO:0015800 GO:0015804 GO:0030003 GO:0070838	acidic amino acid transport; amino acid transport; cellular cation homeostasis; divalent metal ion transport; neutral amino acid transport; positive regulation of flavonoid biosynthetic process; protein targeting to membrane; regulation of plant-type hypersensitive response; response to fructose stimulus; response to salt stress; water transport	GO:0015171	amino acid transmembrane transporter activity	GO:0005886 GO:0005887 GO:0016020	integral to plasma membrane; membrane; plasma membrane
Glyma.04G214700	AT3G18690	MAP kinase substrate 1		GO:0009870	defense response signaling pathway, resistance gene-dependent	GO:0005515	protein binding	GO:0005634	nucleus
Glyma.04G217600	NA	NA		NA	NA	NA	NA	NA	NA
Glyma.04G226100	AT1G18010	Major facilitator superfamily protein		GO:0055085	transmembrane transport	GO:0003674	molecular function	GO:0016021	integral to membrane
Glyma.04G236200	AT5G53370	pectin methylesterase PCR fragment F		GO:0006612 GO:0006833 GO:0009651 GO:0009750 GO:0009963 GO:0010363 GO:0042545	cell wall modification; positive regulation of flavonoid biosynthetic process; protein targeting to membrane; regulation of plant-type hypersensitive response; response to fructose stimulus; response to salt stress; water transport	GO:0004857 GO:0030599	enzyme inhibitor activity; pectinesterase activity	GO:0005634	nucleus
Glyma.04G238300	AT5G24110	WRKY DNA-binding protein 30	WRKY	GO:0006355 GO:0009751 GO:0010193 GO:0042542	regulation of transcription, DNA-dependent; response to hydrogen peroxide; response to ozone; response to salicylic acid stimulus	GO:0003700 GO:0005515 GO:0043565	protein binding; sequence-specific DNA binding; sequence-specific DNA binding transcription factor activity	GO:0005634 GO:0005737	cytoplasm; nucleus
Glyma.04G244000	AT1G21270	wall-associated kinase 2		GO:0006468 GO:0009311 GO:0009751 GO:0009793 GO:0009826 GO:0009992 GO:0010027 GO:0010228 GO:0016226 GO:0019761 GO:0048481	cellular water homeostasis; embryo development ending in seed dormancy; glucosinolate biosynthetic process; iron-sulfur cluster assembly; oligosaccharide metabolic process; ovule development; protein phosphorylation; response to salicylic acid stimulus; thylakoid membrane organization; unidimensional cell growth; vegetative to reproductive phase transition of meristem	GO:0004672 GO:0004674 GO:0005509 GO:0005524 GO:0016772	ATP binding; calcium ion binding; protein kinase activity; protein serine/threonine kinase activity; transferase activity, transferring phosphorus-containing groups	GO:0005886	plasma membrane
Glyma.04G245300	AT1G77280	Protein kinase protein with adenine nucleotide alpha hydrolases-like domain		GO:0002238 GO:0006468	protein phosphorylation; response to molecule of fungal origin	GO:0004672 GO:0004674 GO:0004713 GO:0005524 GO:0016301 GO:0016772	ATP binding; kinase activity; protein kinase activity; protein serine/threonine kinase activity; protein tyrosine kinase activity; transferase activity, transferring phosphorus-containing groups	GO:0005886	plasma membrane
Glyma.04G248700	AT1G44130	Eukaryotic aspartyl protease family protein		GO:0006508	proteolysis	GO:0004190	aspartic-type endopeptidase activity	GO:0005576 GO:0005794 GO:0009505	Golgi apparatus; extracellular region; plant-type cell wall
Glyma.04G253900	AT1G36940	NA		GO:0008150	biological process	GO:0003674	molecular function	GO:0005739 GO:0048046	apoplast; mitochondrion
Glyma.05G008200	AT1G15410	aspartate-glutamate racemase family		GO:0006520 GO:0008152	cellular amino acid metabolic process; metabolic process	GO:0016855	racemase and epimerase activity, acting on amino acids and derivatives	GO:0009507	chloroplast
Glyma.05G010800	AT2G18660	plant natriuretic peptide A		GO:0009627 GO:0010230 GO:0034976	alternative respiration; response to endoplasmic reticulum stress; systemic acquired resistance	NA	NA	GO:0005576 GO:0005618 GO:0048046	apoplast; cell wall; extracellular region
Glyma.05G011200	NA	NA		NA	NA	NA	NA	NA	NA
Glyma.05G015400	AT1G68710	ATPase E1-E2 type family protein / haloacid dehalogenase-like hydrolase family protein		GO:0006812 GO:0008152 GO:0015914	cation transport; metabolic process; phospholipid transport	GO:0000166 GO:0000287 GO:0003824 GO:0004012 GO:0005524 GO:0015662 GO:0016820 GO:0046872	ATP binding; ATPase activity, coupled to transmembrane movement of ions, phosphorylative mechanism; catalytic activity; hydrolase activity, acting on acid anhydrides, catalyzing transmembrane movement of substances; magnesium ion binding; metal ion binding; nucleotide binding; phospholipid-translocating ATPase activity	GO:0016020 GO:0016021	integral to membrane; membrane
Glyma.05G020400	AT3G29575	ABI five binding protein 3		GO:0008150 GO:0009738 GO:0045893	abscisic acid mediated signaling pathway; biological process; positive regulation of transcription, DNA-dependent	GO:0005515	protein binding	GO:0005634	nucleus
Glyma.05G042600	AT3G26330	cytochrome P450, family 71, subfamily B, polypeptide 37		GO:0055114	oxidation-reduction process	GO:0005506 GO:0009055 GO:0016705 GO:0019825 GO:0020037	electron carrier activity; heme binding; iron ion binding; oxidoreductase activity, acting on paired donors, with incorporation or reduction of molecular oxygen; oxygen binding	GO:0005576	extracellular region
Glyma.05G043900	AT3G48360	BTB and TAZ domain protein 2		GO:0006355 GO:0007623 GO:0009409 GO:0009553 GO:0009555 GO:0009611 GO:0009651 GO:0009733 GO:0009734 GO:0009737 GO:0009738 GO:0009743 GO:0009751 GO:0009753 GO:0010167 GO:0010182 GO:0042542 GO:0051973	abscisic acid mediated signaling pathway; auxin mediated signaling pathway; circadian rhythm; embryo sac development; pollen development; positive regulation of telomerase activity; regulation of transcription, DNA-dependent; response to abscisic acid stimulus; response to auxin stimulus; response to carbohydrate stimulus; response to cold; response to hydrogen peroxide; response to jasmonic acid…	GO:0003700 GO:0003712 GO:0004402 GO:0005515 GO:0005516 GO:0008270	calmodulin binding; histone acetyltransferase activity; protein binding; sequence-specific DNA binding transcription factor activity; transcription cofactor activity; zinc ion binding	GO:0005634 GO:0005737	cytoplasm; nucleus
Glyma.05G054600	AT4G22860	Cell cycle regulated microtubule associated protein		GO:0000226 GO:0000911 GO:0006342 GO:0006346 GO:0008150 GO:0009909 GO:0016458 GO:0031048 GO:0034968 GO:0042127 GO:0051567	biological process; chromatin silencing; chromatin silencing by small RNA; cytokinesis by cell plate formation; gene silencing; histone H3-K9 methylation; histone lysine methylation; methylation-dependent chromatin silencing; microtubule cytoskeleton organization; regulation of cell proliferation; regulation of flower development	GO:0003674	molecular function	GO:0005634 GO:0005739	mitochondrion; nucleus
Glyma.05G055100	AT1G62790	Bifunctional inhibitor/lipid-transfer protein/seed storage 2S albumin superfamily protein		GO:0006869	lipid transport	GO:0008289	lipid binding	GO:0031225	anchored to membrane
Glyma.05G072300	AT3G01720	NA		GO:0006816 GO:0007030 GO:0008150 GO:0009651 GO:0009744 GO:0009749 GO:0009750	Golgi organization; biological process; calcium ion transport; response to fructose stimulus; response to glucose stimulus; response to salt stress; response to sucrose stimulus	GO:0016757	transferase activity, transferring glycosyl groups	NA	NA
Glyma.05G080500	AT3G50520	Phosphoglycerate mutase family protein		GO:0008152	metabolic process	GO:0003824	catalytic activity	GO:0005575	cellular component
Glyma.05G081900	AT5G66880	sucrose nonfermenting 1(SNF1)-related protein kinase 2.3		GO:0006468 GO:0006970 GO:0009414 GO:0009651 GO:0009737 GO:0009738 GO:0009739 GO:0009789 GO:0010029	abscisic acid mediated signaling pathway; positive regulation of abscisic acid mediated signaling pathway; protein phosphorylation; regulation of seed germination; response to abscisic acid stimulus; response to gibberellin stimulus; response to osmotic stress; response to salt stress; response to water deprivation	GO:0004672 GO:0004674 GO:0005515 GO:0005524 GO:0016301 GO:0016772	ATP binding; kinase activity; protein binding; protein kinase activity; protein serine/threonine kinase activity; transferase activity, transferring phosphorus-containing groups	GO:0005634 GO:0005737 GO:0005829	cytoplasm; cytosol; nucleus
Glyma.05G082400	AT5G66900	Disease resistance protein (CC-NBS-LRR class) family		GO:0006952	defense response	GO:0043531	ADP binding	GO:0005634	nucleus
Glyma.05G096500	AT2G23320	WRKY DNA-binding protein 15	WRKY	GO:0002679 GO:0006355 GO:0009693 GO:0010200 GO:0035556	ethylene biosynthetic process; intracellular signal transduction; regulation of transcription, DNA-dependent; respiratory burst involved in defense response; response to chitin	GO:0003700 GO:0005516 GO:0043565	calmodulin binding; sequence-specific DNA binding; sequence-specific DNA binding transcription factor activity	GO:0005634	nucleus
Glyma.05G101700	AT2G23150	natural resistance-associated macrophage protein 3		GO:0006810 GO:0006828 GO:0006875 GO:0009617 GO:0010043 GO:0015691 GO:0015692 GO:0030001 GO:0042742 GO:0055072 GO:2000379	cadmium ion transport; cellular metal ion homeostasis; defense response to bacterium; iron ion homeostasis; lead ion transport; manganese ion transport; metal ion transport; positive regulation of reactive oxygen species metabolic process; response to bacterium; response to zinc ion; transport	GO:0005215 GO:0005384 GO:0015103 GO:0046873	inorganic anion transmembrane transporter activity; manganese ion transmembrane transporter activity; metal ion transmembrane transporter activity; transporter activity	GO:0005737 GO:0005773 GO:0005774 GO:0005794 GO:0009506 GO:0016020	Golgi apparatus; cytoplasm; membrane; plasmodesma; vacuolar membrane; vacuole
Glyma.05G103600	AT5G67400	root hair specific 19		GO:0006979 GO:0010054 GO:0055114	oxidation-reduction process; response to oxidative stress; trichoblast differentiation	GO:0004601 GO:0020037	heme binding; peroxidase activity	GO:0005576	extracellular region
Glyma.05G114000	AT1G67750	Pectate lyase family protein		GO:0008150	biological process	GO:0030570	pectate lyase activity	GO:0005576	extracellular region
Glyma.05G119500	AT4G33430	BRI1-associated receptor kinase		GO:0002229 GO:0002679 GO:0006612 GO:0008219 GO:0009742 GO:0009863 GO:0010200 GO:0010363 GO:0016049 GO:0016310 GO:0030968 GO:0042742 GO:0043069 GO:0050832	brassinosteroid mediated signaling pathway; cell death; cell growth; defense response to bacterium; defense response to fungus; defense response to oomycetes; endoplasmic reticulum unfolded protein response; negative regulation of programmed cell death; phosphorylation; protein targeting to membrane; regulation of plant-type hypersensitive response; respiratory burst involved in defense response;…	GO:0004672 GO:0004674 GO:0005515 GO:0016301 GO:0033612 GO:0046982	kinase activity; protein binding; protein heterodimerization activity; protein kinase activity; protein serine/threonine kinase activity; receptor serine/threonine kinase binding	GO:0005768 GO:0005886 GO:0043234	endosome; plasma membrane; protein complex
Glyma.05G119600	AT4G33430	BRI1-associated receptor kinase		GO:0002229 GO:0002679 GO:0006612 GO:0008219 GO:0009742 GO:0009863 GO:0010200 GO:0010363 GO:0016049 GO:0016310 GO:0030968 GO:0042742 GO:0043069 GO:0050832	brassinosteroid mediated signaling pathway; cell death; cell growth; defense response to bacterium; defense response to fungus; defense response to oomycetes; endoplasmic reticulum unfolded protein response; negative regulation of programmed cell death; phosphorylation; protein targeting to membrane; regulation of plant-type hypersensitive response; respiratory burst involved in defense response;…	GO:0004672 GO:0004674 GO:0005515 GO:0016301 GO:0033612 GO:0046982	kinase activity; protein binding; protein heterodimerization activity; protein kinase activity; protein serine/threonine kinase activity; receptor serine/threonine kinase binding	GO:0005768 GO:0005886 GO:0043234	endosome; plasma membrane; protein complex
Glyma.05G132900	AT5G44790	copper-exporting ATPase / responsive-to-antagonist 1 / copper-transporting ATPase (RAN1)		GO:0000041 GO:0000303 GO:0006487 GO:0006754 GO:0006812 GO:0006825 GO:0007165 GO:0008152 GO:0008219 GO:0009723 GO:0009755 GO:0009863 GO:0009873 GO:0010119 GO:0030001 GO:0046034	ATP biosynthetic process; ATP metabolic process; cation transport; cell death; copper ion transport; ethylene mediated signaling pathway; hormone-mediated signaling pathway; metabolic process; metal ion transport; protein N-linked glycosylation; regulation of stomatal movement; response to ethylene stimulus; response to superoxide; salicylic acid mediated signaling pathway; signal transduction; t…	GO:0000166 GO:0003824 GO:0005375 GO:0005507 GO:0005524 GO:0015662 GO:0016820 GO:0043682 GO:0046872	ATP binding; ATPase activity, coupled to transmembrane movement of ions, phosphorylative mechanism; catalytic activity; copper-transporting ATPase activity; copper ion binding; copper ion transmembrane transporter activity; hydrolase activity, acting on acid anhydrides, catalyzing transmembrane movement of substances; metal ion binding; nucleotide binding	GO:0005768 GO:0005794 GO:0005802 GO:0016020 GO:0016021	Golgi apparatus; endosome; integral to membrane; membrane; trans-Golgi network
Glyma.05G136100	AT2G02010	glutamate decarboxylase 4		GO:0006536 GO:0006540 GO:0019752	carboxylic acid metabolic process; glutamate decarboxylation to succinate; glutamate metabolic process	GO:0003824 GO:0004351 GO:0005516 GO:0016831 GO:0030170	calmodulin binding; carboxy-lyase activity; catalytic activity; glutamate decarboxylase activity; pyridoxal phosphate binding	GO:0005634 GO:0005829	cytosol; nucleus
Glyma.05G137800	AT1G17020	senescence-related gene 1		GO:0009737 GO:0009793 GO:0009813 GO:0009830 GO:0009845 GO:0010162 GO:0010260 GO:0055114	cell wall modification involved in abscission; embryo development ending in seed dormancy; flavonoid biosynthetic process; organ senescence; oxidation-reduction process; response to abscisic acid stimulus; seed dormancy process; seed germination	GO:0016491 GO:0016682 GO:0016706	oxidoreductase activity; oxidoreductase activity, acting on diphenols and related substances as donors, oxygen as acceptor; oxidoreductase activity, acting on paired donors, with incorporation or reduction of molecular oxygen, 2-oxoglutarate as one donor, and incorporation of one atom each of oxygen into both donors	GO:0005737	cytoplasm
Glyma.05G141200	AT1G30135	jasmonate-zim-domain protein 8		GO:0008150 GO:0009611 GO:0009620 GO:0009693 GO:0009695 GO:0009753 GO:0009867	biological process; ethylene biosynthetic process; jasmonic acid biosynthetic process; jasmonic acid mediated signaling pathway; response to fungus; response to jasmonic acid stimulus; response to wounding	GO:0005515	protein binding	GO:0005634	nucleus
Glyma.05G143500	AT1G30320	Remorin family protein		NA	NA	GO:0003677	DNA binding	GO:0005737 GO:0005886	cytoplasm; plasma membrane
Glyma.05G155600	AT1G15670	Galactose oxidase/kelch repeat superfamily protein		GO:0080037	negative regulation of cytokinin mediated signaling pathway	GO:0003674	molecular function	GO:0005634	nucleus
Glyma.05G161900	AT5G60490	FASCICLIN-like arabinogalactan-protein 12		GO:0009834	secondary cell wall biogenesis	NA	NA	GO:0005886 GO:0031225	anchored to membrane; plasma membrane
Glyma.05G169900	AT2G02850	plantacyanin		GO:0009640 GO:0009737 GO:0009793 GO:0009845 GO:0009856 GO:0009909 GO:0009933 GO:0010162 GO:0010182 GO:0010228 GO:0016567 GO:0019915 GO:0048653 GO:0050826	anther development; embryo development ending in seed dormancy; lipid storage; meristem structural organization; photomorphogenesis; pollination; protein ubiquitination; regulation of flower development; response to abscisic acid stimulus; response to freezing; seed dormancy process; seed germination; sugar mediated signaling pathway; vegetative to reproductive phase transition of meristem	GO:0005507 GO:0009055	copper ion binding; electron carrier activity	GO:0005886 GO:0048046 GO:0048196	apoplast; plant extracellular matrix; plasma membrane
Glyma.05G174900	NA	NA		NA	NA	NA	NA	NA	NA
Glyma.05G178200	AT5G64220	Calmodulin-binding transcription activator protein with CG-1 and Ankyrin domains	CAMTA	GO:0006355 GO:0009409	regulation of transcription, DNA-dependent; response to cold	GO:0003677 GO:0005516	DNA binding; calmodulin binding	GO:0005634	nucleus
Glyma.05G179900	AT4G39780	Integrase-type DNA-binding superfamily protein	ERF	GO:0006355	regulation of transcription, DNA-dependent	GO:0003677 GO:0003700	DNA binding; sequence-specific DNA binding transcription factor activity	GO:0005634	nucleus
Glyma.05G186700	AT5G61890	Integrase-type DNA-binding superfamily protein	ERF	GO:0006355 GO:0006865 GO:0050832	amino acid transport; defense response to fungus; regulation of transcription, DNA-dependent	GO:0003677 GO:0003700	DNA binding; sequence-specific DNA binding transcription factor activity	GO:0005634	nucleus
Glyma.05G195000	AT1G01720	NAC (No Apical Meristem) domain transcriptional regulator superfamily protein	NAC	GO:0006355 GO:0007275 GO:0009414 GO:0009611 GO:0009620 GO:0009695 GO:0009737 GO:0009753 GO:0009788 GO:0010200 GO:0042538	hyperosmotic salinity response; jasmonic acid biosynthetic process; multicellular organismal development; negative regulation of abscisic acid mediated signaling pathway; regulation of transcription, DNA-dependent; response to abscisic acid stimulus; response to chitin; response to fungus; response to jasmonic acid stimulus; response to water deprivation; response to wounding	GO:0003677 GO:0003700	DNA binding; sequence-specific DNA binding transcription factor activity	GO:0005634	nucleus
Glyma.05G196100	AT5G63770	diacylglycerol kinase 2		GO:0007205 GO:0009409 GO:0009611 GO:0035556 GO:0048193 GO:0048364 GO:0048366 GO:0048527	Golgi vesicle transport; intracellular signal transduction; lateral root development; leaf development; protein kinase C-activating G-protein coupled receptor signaling pathway; response to cold; response to wounding; root development	GO:0004143	diacylglycerol kinase activity	GO:0005634	nucleus
Glyma.05G197000	AT4G24290	MAC/Perforin domain-containing protein		GO:0008150	biological process	GO:0003674	molecular function	GO:0005576 GO:0005886	extracellular region; plasma membrane
Glyma.05G198500	AT5G23570	XS domain-containing protein / XS zinc finger domain-containing protein-related		GO:0009616 GO:0010025 GO:0010050 GO:0010267 GO:0035196 GO:0051607	defense response to virus; production of miRNAs involved in gene silencing by miRNA; production of ta-siRNAs involved in RNA interference; vegetative phase change; virus induced gene silencing; wax biosynthetic process	NA	NA	GO:0005737 GO:0005783 GO:0005829	cytoplasm; cytosol; endoplasmic reticulum
Glyma.05G204600	AT4G11650	osmotin 34		GO:0009651 GO:0009816 GO:0009817 GO:0051707	defense response to bacterium, incompatible interaction; defense response to fungus, incompatible interaction; response to other organism; response to salt stress	NA	NA	GO:0005576	extracellular region
Glyma.05G204800	AT4G11650	osmotin 34		GO:0009651 GO:0009816 GO:0009817 GO:0051707	defense response to bacterium, incompatible interaction; defense response to fungus, incompatible interaction; response to other organism; response to salt stress	NA	NA	GO:0005576	extracellular region
Glyma.05G209100	AT5G52430	hydroxyproline-rich glycoprotein family protein		GO:0008150	biological process	GO:0003674	molecular function	GO:0005634	nucleus
Glyma.05G215900	AT4G11070	WRKY family transcription factor	WRKY	GO:0006355	regulation of transcription, DNA-dependent	GO:0003700 GO:0043565	sequence-specific DNA binding; sequence-specific DNA binding transcription factor activity	GO:0005634	nucleus
Glyma.05G232100	AT3G24460	Serinc-domain containing serine and sphingolipid biosynthesis protein		NA	NA	NA	NA	GO:0016020	membrane
Glyma.05G234600	AT1G25340	myb domain protein 116	MYB	GO:0006355	regulation of transcription, DNA-dependent	GO:0003677 GO:0003700	DNA binding; sequence-specific DNA binding transcription factor activity	GO:0005634	nucleus
Glyma.05G237100	AT1G66910	Protein kinase superfamily protein		GO:0006468	protein phosphorylation	GO:0004672 GO:0004674 GO:0004713 GO:0005524 GO:0016301 GO:0016772	ATP binding; kinase activity; protein kinase activity; protein serine/threonine kinase activity; protein tyrosine kinase activity; transferase activity, transferring phosphorus-containing groups	GO:0005886	plasma membrane
Glyma.05G238100	AT2G01670	nudix hydrolase homolog 17		NA	NA	GO:0016787	hydrolase activity	GO:0005739	mitochondrion
Glyma.05G242600	AT1G45688	NA		GO:0008150 GO:0048767	biological process; root hair elongation	GO:0003674	molecular function	GO:0005886 GO:0009507	chloroplast; plasma membrane
Glyma.05G245600	AT1G18210	Calcium-binding EF-hand family protein		GO:0008150	biological process	GO:0005509	calcium ion binding	GO:0005773 GO:0005886	plasma membrane; vacuole
Glyma.06G007000	NA	NA		NA	NA	NA	NA	NA	NA
Glyma.06G019500	AT1G47670	Transmembrane amino acid transporter family protein		GO:0006865 GO:0010075	amino acid transport; regulation of meristem growth	GO:0015171	amino acid transmembrane transporter activity	GO:0005886 GO:0016020	membrane; plasma membrane
Glyma.06G024000	AT1G30755	Protein of unknown function (DUF668)		GO:0008150	biological process	NA	NA	GO:0005634	nucleus
Glyma.06G057300	AT2G05940	Protein kinase superfamily protein		GO:0000165 GO:0006468 GO:0006499 GO:0006612 GO:0007154 GO:0009409 GO:0009414 GO:0009611 GO:0009625 GO:0009627 GO:0009697 GO:0009738 GO:0009862 GO:0009863 GO:0009867 GO:0009963 GO:0010363 GO:0016036 GO:0019375 GO:0030968 GO:0031348 GO:0042538 GO:0042631 GO:0042742 GO:0043069 GO:0045087 GO:0050832	MAPK cascade; N-terminal protein myristoylation; abscisic acid mediated signaling pathway; cell communication; cellular response to phosphate starvation; cellular response to water deprivation; defense response to bacterium; defense response to fungus; endoplasmic reticulum unfolded protein response; galactolipid biosynthetic process; hyperosmotic salinity response; innate immune response; jasmon…	GO:0004672 GO:0004674 GO:0005524 GO:0016301 GO:0016772	ATP binding; kinase activity; protein kinase activity; protein serine/threonine kinase activity; transferase activity, transferring phosphorus-containing groups	GO:0005886	plasma membrane
Glyma.06G061900	AT1G80840	WRKY DNA-binding protein 40	WRKY	GO:0000165 GO:0002237 GO:0002679 GO:0006355 GO:0006612 GO:0006944 GO:0009595 GO:0009611 GO:0009612 GO:0009620 GO:0009646 GO:0009695 GO:0009697 GO:0009723 GO:0009738 GO:0009751 GO:0009753 GO:0009862 GO:0009863 GO:0009867 GO:0009873 GO:0010200 GO:0010310 GO:0010363 GO:0016045 GO:0030968 GO:0031347 GO:0031348 GO:0035556 GO:0042742 GO:0043069 GO:0043900 GO:0050691 GO:0050776 GO:0050832	MAPK cascade; abscisic acid mediated signaling pathway; cellular membrane fusion; defense response to bacterium; defense response to fungus; detection of bacterium; detection of biotic stimulus; endoplasmic reticulum unfolded protein response; ethylene mediated signaling pathway; intracellular signal transduction; jasmonic acid biosynthetic process; jasmonic acid mediated signaling pathway; negat…	GO:0003700 GO:0005515 GO:0043565	protein binding; sequence-specific DNA binding; sequence-specific DNA binding transcription factor activity	GO:0005634	nucleus
Glyma.06G062000	NA	NA		NA	NA	NA	NA	NA	NA
Glyma.06G067000	AT2G45180	Bifunctional inhibitor/lipid-transfer protein/seed storage 2S albumin superfamily protein		GO:0000038 GO:0006869 GO:0042335	cuticle development; lipid transport; very long-chain fatty acid metabolic process	GO:0008289	lipid binding	GO:0005576 GO:0009535	chloroplast thylakoid membrane; extracellular region
Glyma.06G067900	AT4G32295	NA		GO:0008150	biological process	GO:0003674	molecular function	GO:0005739	mitochondrion
Glyma.06G069100	AT3G47650	DnaJ/Hsp40 cysteine-rich domain superfamily protein		GO:0006098 GO:0006364 GO:0009657 GO:0009773 GO:0010207 GO:0019288	isopentenyl diphosphate biosynthetic process, mevalonate-independent pathway; pentose-phosphate shunt; photosynthetic electron transport in photosystem I; photosystem II assembly; plastid organization; rRNA processing	GO:0031072 GO:0051082	heat shock protein binding; unfolded protein binding	GO:0009507	chloroplast
Glyma.06G084300	AT4G28880	casein kinase I-like 3		GO:0006468	protein phosphorylation	GO:0004672 GO:0004674 GO:0005524 GO:0016301 GO:0016772	ATP binding; kinase activity; protein kinase activity; protein serine/threonine kinase activity; transferase activity, transferring phosphorus-containing groups	GO:0005575	cellular component
Glyma.06G087800	AT5G25880	NADP-malic enzyme 3		GO:0006094 GO:0006108 GO:0006499 GO:0007010 GO:0009827 GO:0009860 GO:0010498 GO:0051260 GO:0055114	N-terminal protein myristoylation; cytoskeleton organization; gluconeogenesis; malate metabolic process; oxidation-reduction process; plant-type cell wall modification; pollen tube growth; proteasomal protein catabolic process; protein homooligomerization	GO:0000166 GO:0004470 GO:0004473 GO:0016491 GO:0016616 GO:0016619 GO:0016652 GO:0046872 GO:0051287	NAD binding; malate dehydrogenase (oxaloacetate-decarboxylating) (NADP+) activity; malate dehydrogenase (oxaloacetate-decarboxylating) activity; malic enzyme activity; metal ion binding; nucleotide binding; oxidoreductase activity; oxidoreductase activity, acting on NAD(P)H, NAD(P) as acceptor; oxidoreductase activity, acting on the CH-OH group of donors, NAD or NADP as acceptor	GO:0005829 GO:0009507	chloroplast; cytosol
Glyma.06G088300	AT1G10010	amino acid permease 8		GO:0006865	amino acid transport	GO:0015171	amino acid transmembrane transporter activity	GO:0005886 GO:0016020	membrane; plasma membrane
Glyma.06G093400	AT5G49700	Predicted AT-hook DNA-binding family protein		GO:0008150	biological process	NA	NA	GO:0005634	nucleus
Glyma.06G097300	AT4G24510	HXXXD-type acyl-transferase family protein		GO:0000038 GO:0010025 GO:0019344 GO:0042335 GO:0042546 GO:0042761	cell wall biogenesis; cuticle development; cysteine biosynthetic process; very long-chain fatty acid biosynthetic process; very long-chain fatty acid metabolic process; wax biosynthetic process	GO:0016740 GO:0016747	transferase activity; transferase activity, transferring acyl groups other than amino-acyl groups	GO:0005634 GO:0005783	endoplasmic reticulum; nucleus
Glyma.06G099700	AT4G40080	ENTH/ANTH/VHS superfamily protein		GO:0008150 GO:0010167 GO:0015706	biological process; nitrate transport; response to nitrate	GO:0005543	phospholipid binding	GO:0005739	mitochondrion
Glyma.06G100900	AT1G35210	NA		GO:0009693 GO:0010224	ethylene biosynthetic process; response to UV-B	GO:0003674	molecular function	GO:0005739	mitochondrion
Glyma.06G108100	AT1G77810	Galactosyltransferase family protein		GO:0006486	protein glycosylation	GO:0008378 GO:0016757 GO:0048531	beta-1,3-galactosyltransferase activity; galactosyltransferase activity; transferase activity, transferring glycosyl groups	GO:0005794 GO:0016020	Golgi apparatus; membrane
Glyma.06G110700	AT5G35370	S-locus lectin protein kinase family protein		GO:0006468	protein phosphorylation	GO:0004672 GO:0004674 GO:0004713 GO:0005524 GO:0016301 GO:0016772 GO:0030246	ATP binding; carbohydrate binding; kinase activity; protein kinase activity; protein serine/threonine kinase activity; protein tyrosine kinase activity; transferase activity, transferring phosphorus-containing groups	GO:0005886	plasma membrane
Glyma.06G114200	AT1G44130	Eukaryotic aspartyl protease family protein		GO:0006508	proteolysis	GO:0004190	aspartic-type endopeptidase activity	GO:0005576 GO:0005794 GO:0009505	Golgi apparatus; extracellular region; plant-type cell wall
Glyma.06G117900	AT1G77280	Protein kinase protein with adenine nucleotide alpha hydrolases-like domain		GO:0002238 GO:0006468	protein phosphorylation; response to molecule of fungal origin	GO:0004672 GO:0004674 GO:0004713 GO:0005524 GO:0016301 GO:0016772	ATP binding; kinase activity; protein kinase activity; protein serine/threonine kinase activity; protein tyrosine kinase activity; transferase activity, transferring phosphorus-containing groups	GO:0005886	plasma membrane
Glyma.06G125600	AT5G24110	WRKY DNA-binding protein 30	WRKY	GO:0006355 GO:0009751 GO:0010193 GO:0042542	regulation of transcription, DNA-dependent; response to hydrogen peroxide; response to ozone; response to salicylic acid stimulus	GO:0003700 GO:0005515 GO:0043565	protein binding; sequence-specific DNA binding; sequence-specific DNA binding transcription factor activity	GO:0005634 GO:0005737	cytoplasm; nucleus
Glyma.06G129800	AT4G27810	NA		GO:0008150	biological process	GO:0003674	molecular function	GO:0005634	nucleus
Glyma.06G144000	AT5G05300	NA		GO:0008150 GO:0009693 GO:0010200 GO:0050832	biological process; defense response to fungus; ethylene biosynthetic process; response to chitin	GO:0003674	molecular function	GO:0009507	chloroplast
Glyma.06G147100	AT5G64810	WRKY DNA-binding protein 51	WRKY	GO:0006355 GO:0009867 GO:0042742 GO:0050832	defense response to bacterium; defense response to fungus; jasmonic acid mediated signaling pathway; regulation of transcription, DNA-dependent	GO:0003700 GO:0043565	sequence-specific DNA binding; sequence-specific DNA binding transcription factor activity	GO:0005634	nucleus
Glyma.06G154700	AT1G21390	embryo defective 2170		GO:0009693 GO:0009793	embryo development ending in seed dormancy; ethylene biosynthetic process	GO:0003674	molecular function	GO:0005634	nucleus
Glyma.06G170300	AT5G50400	purple acid phosphatase 27		NA	NA	GO:0003993 GO:0004722 GO:0016787 GO:0046872	acid phosphatase activity; hydrolase activity; metal ion binding; protein serine/threonine phosphatase activity	GO:0005576	extracellular region
Glyma.06G182700	AT5G14740	carbonic anhydrase 2		GO:0000165 GO:0006612 GO:0009409 GO:0009595 GO:0009697 GO:0009814 GO:0009862 GO:0009867 GO:0010200 GO:0010310 GO:0010363 GO:0015976 GO:0019243 GO:0019684 GO:0031348 GO:0042742 GO:0043900 GO:0050832	MAPK cascade; carbon utilization; defense response, incompatible interaction; defense response to bacterium; defense response to fungus; detection of biotic stimulus; jasmonic acid mediated signaling pathway; methylglyoxal catabolic process to D-lactate; negative regulation of defense response; photosynthesis, light reaction; protein targeting to membrane; regulation of hydrogen peroxide metaboli…	GO:0004089 GO:0008270	carbonate dehydratase activity; zinc ion binding	GO:0005737 GO:0005829 GO:0009507 GO:0009535 GO:0009570 GO:0009941 GO:0048046	apoplast; chloroplast; chloroplast envelope; chloroplast stroma; chloroplast thylakoid membrane; cytoplasm; cytosol
Glyma.06G184200	AT1G23870	trehalose-phosphatase/synthase 9		GO:0005992 GO:0008152 GO:0009744 GO:0009750	metabolic process; response to fructose stimulus; response to sucrose stimulus; trehalose biosynthetic process	GO:0003824 GO:0004805 GO:0016757	catalytic activity; transferase activity, transferring glycosyl groups; trehalose-phosphatase activity	GO:0005634	nucleus
Glyma.06G186200	AT1G19020	NA		GO:0006979 GO:0009611 GO:0009625 GO:0009862 GO:0010200 GO:0030968 GO:0031348 GO:0050832	defense response to fungus; endoplasmic reticulum unfolded protein response; negative regulation of defense response; response to chitin; response to insect; response to oxidative stress; response to wounding; systemic acquired resistance, salicylic acid mediated signaling pathway	GO:0003674	molecular function	GO:0005575	cellular component
Glyma.06G187200	AT3G48090	alpha/beta-Hydrolases superfamily protein		GO:0000165 GO:0000304 GO:0001666 GO:0002679 GO:0006355 GO:0006612 GO:0006629 GO:0006944 GO:0006952 GO:0009595 GO:0009617 GO:0009626 GO:0009627 GO:0009697 GO:0009862 GO:0009863 GO:0009867 GO:0010200 GO:0010310 GO:0010363 GO:0010618 GO:0010942 GO:0031347 GO:0031348 GO:0034976 GO:0035304 GO:0042742 GO:0043069 GO:0043900 GO:0045088 GO:0050832 GO:0051707	MAPK cascade; aerenchyma formation; cellular membrane fusion; defense response; defense response to bacterium; defense response to fungus; detection of biotic stimulus; jasmonic acid mediated signaling pathway; lipid metabolic process; negative regulation of defense response; negative regulation of programmed cell death; plant-type hypersensitive response; positive regulation of cell death; prote…	GO:0004806 GO:0004871 GO:0005515 GO:0016298	lipase activity; protein binding; signal transducer activity; triglyceride lipase activity	GO:0005634 GO:0005737 GO:0009507	chloroplast; cytoplasm; nucleus
Glyma.06G190100	AT2G47140	NAD(P)-binding Rossmann-fold superfamily protein		GO:0008152	metabolic process	GO:0000166 GO:0016491	nucleotide binding; oxidoreductase activity	GO:0005737	cytoplasm
Glyma.06G195600	AT5G15310	myb domain protein 16	MYB	GO:0000902 GO:0006355 GO:0009651 GO:0009723 GO:0009733 GO:0009739 GO:0009751 GO:0009753 GO:0046686	cell morphogenesis; regulation of transcription, DNA-dependent; response to auxin stimulus; response to cadmium ion; response to ethylene stimulus; response to gibberellin stimulus; response to jasmonic acid stimulus; response to salicylic acid stimulus; response to salt stress	GO:0003677 GO:0003700	DNA binding; sequence-specific DNA binding transcription factor activity	GO:0005634	nucleus
Glyma.06G254900	AT2G20900	diacylglycerol kinase 5		GO:0007205 GO:0009723	protein kinase C-activating G-protein coupled receptor signaling pathway; response to ethylene stimulus	GO:0004143	diacylglycerol kinase activity	NA	NA
Glyma.06G259800	AT5G17680	disease resistance protein (TIR-NBS-LRR class), putative		GO:0006952 GO:0007165	defense response; signal transduction	GO:0043531	ADP binding	GO:0005622	intracellular
Glyma.06G260100	AT4G12010	Disease resistance protein (TIR-NBS-LRR class) family		GO:0006612 GO:0006952 GO:0007165 GO:0009963 GO:0010363	defense response; positive regulation of flavonoid biosynthetic process; protein targeting to membrane; regulation of plant-type hypersensitive response; signal transduction	GO:0043531	ADP binding	GO:0005634	nucleus
Glyma.06G265100	NA	NA		NA	NA	NA	NA	NA	NA
Glyma.06G275900	AT5G05340	Peroxidase superfamily protein		GO:0006979 GO:0055114	oxidation-reduction process; response to oxidative stress	GO:0004601 GO:0005515 GO:0020037	heme binding; peroxidase activity; protein binding	GO:0005576 GO:0005618 GO:0005794 GO:0005829 GO:0048046	Golgi apparatus; apoplast; cell wall; cytosol; extracellular region
Glyma.06G282500	AT4G38825	SAUR-like auxin-responsive protein family		GO:0008150	biological process	GO:0003674	molecular function	GO:0005739	mitochondrion
Glyma.06G291900	AT4G20970	basic helix-loop-helix (bHLH) DNA-binding superfamily protein	bHLH	GO:0006355 GO:0050832	defense response to fungus; regulation of transcription, DNA-dependent	GO:0003677 GO:0003700	DNA binding; sequence-specific DNA binding transcription factor activity	GO:0005634	nucleus
Glyma.06G299900	AT2G31180	myb domain protein 14	MYB	GO:0006355 GO:0009651 GO:0009723 GO:0009733 GO:0009751 GO:0009753	regulation of transcription, DNA-dependent; response to auxin stimulus; response to ethylene stimulus; response to jasmonic acid stimulus; response to salicylic acid stimulus; response to salt stress	GO:0003677 GO:0003700	DNA binding; sequence-specific DNA binding transcription factor activity	GO:0005634	nucleus
Glyma.06G300100	AT2G31180	myb domain protein 14	MYB	GO:0006355 GO:0009651 GO:0009723 GO:0009733 GO:0009751 GO:0009753	regulation of transcription, DNA-dependent; response to auxin stimulus; response to ethylene stimulus; response to jasmonic acid stimulus; response to salicylic acid stimulus; response to salt stress	GO:0003677 GO:0003700	DNA binding; sequence-specific DNA binding transcription factor activity	GO:0005634	nucleus
Glyma.06G302200	AT3G25830	terpene synthase-like sequence-1,8-cineole		GO:0008152 GO:0016099	metabolic process; monoterpenoid biosynthetic process	GO:0000287 GO:0010333 GO:0016829 GO:0034768 GO:0050551	(E)-beta-ocimene synthase activity; lyase activity; magnesium ion binding; myrcene synthase activity; terpene synthase activity	GO:0009507	chloroplast
Glyma.06G307100	AT1G76160	SKU5 similar 5		GO:0016126 GO:0052541 GO:0052546 GO:0055114	cell wall pectin metabolic process; oxidation-reduction process; plant-type cell wall cellulose metabolic process; sterol biosynthetic process	GO:0005507 GO:0016491	copper ion binding; oxidoreductase activity	GO:0005576 GO:0005618 GO:0009505 GO:0009506 GO:0048046	apoplast; cell wall; extracellular region; plant-type cell wall; plasmodesma
Glyma.06G307700	AT1G62300	WRKY family transcription factor	WRKY	GO:0002679 GO:0006355 GO:0009407 GO:0010200 GO:0010583 GO:0016036 GO:0035556 GO:0043090 GO:0045892 GO:0080169	amino acid import; cellular response to boron-containing substance deprivation; cellular response to phosphate starvation; intracellular signal transduction; negative regulation of transcription, DNA-dependent; regulation of transcription, DNA-dependent; respiratory burst involved in defense response; response to chitin; response to cyclopentenone; toxin catabolic process	GO:0003700 GO:0005515 GO:0043565 GO:0044212	protein binding; sequence-specific DNA binding; sequence-specific DNA binding transcription factor activity; transcription regulatory region DNA binding	GO:0005634	nucleus
Glyma.06G310100	AT1G68620	alpha/beta-Hydrolases superfamily protein		GO:0008152 GO:0009407 GO:0010200 GO:0010583	metabolic process; response to chitin; response to cyclopentenone; toxin catabolic process	GO:0016787	hydrolase activity	GO:0005634	nucleus
Glyma.06G318400	AT5G51460	Haloacid dehalogenase-like hydrolase (HAD) superfamily protein		GO:0005992 GO:0008152	metabolic process; trehalose biosynthetic process	GO:0003824 GO:0004805	catalytic activity; trehalose-phosphatase activity	GO:0005634	nucleus
Glyma.06G319500	NA	NA		NA	NA	NA	NA	NA	NA
Glyma.07G005200	AT3G16060	ATP binding microtubule motor family protein		GO:0007018	microtubule-based movement	GO:0003777 GO:0005524	ATP binding; microtubule motor activity	GO:0005634 GO:0005739 GO:0005886	mitochondrion; nucleus; plasma membrane
Glyma.07G005900	AT1G79910	Regulator of Vps4 activity in the MVB pathway protein		GO:0008150	biological process	GO:0003674	molecular function	GO:0005737	cytoplasm
Glyma.07G012100	AT1G51700	DOF zinc finger protein 1	Dof	GO:0006355 GO:0010200	regulation of transcription, DNA-dependent; response to chitin	GO:0003677 GO:0003700 GO:0008270	DNA binding; sequence-specific DNA binding transcription factor activity; zinc ion binding	GO:0005634	nucleus
Glyma.07G013500	AT2G25930	hydroxyproline-rich glycoprotein family protein		GO:0007623 GO:0009409 GO:0009585 GO:0009649 GO:0009733 GO:0009737 GO:0009826 GO:0009909 GO:0010031 GO:0010119 GO:0048573	circadian rhythm; circumnutation; entrainment of circadian clock; photoperiodism, flowering; red, far-red light phototransduction; regulation of flower development; regulation of stomatal movement; response to abscisic acid stimulus; response to auxin stimulus; response to cold; unidimensional cell growth	GO:0003700 GO:0008022	protein C-terminus binding; sequence-specific DNA binding transcription factor activity	GO:0005634	nucleus
Glyma.07G020400	AT3G21150	B-box 32		GO:0006355 GO:0009640 GO:0009785 GO:0009909 GO:0010017 GO:0010200 GO:0045892	blue light signaling pathway; negative regulation of transcription, DNA-dependent; photomorphogenesis; red or far-red light signaling pathway; regulation of flower development; regulation of transcription, DNA-dependent; response to chitin	GO:0003700 GO:0005515 GO:0008270	protein binding; sequence-specific DNA binding transcription factor activity; zinc ion binding	GO:0005634 GO:0005737	cytoplasm; nucleus
Glyma.07G023000	AT1G15980	NDH-dependent cyclic electron flow 1		GO:0006098 GO:0009773 GO:0010207 GO:0015979 GO:0016117	carotenoid biosynthetic process; pentose-phosphate shunt; photosynthesis; photosynthetic electron transport in photosystem I; photosystem II assembly	NA	NA	GO:0009507 GO:0009534 GO:0009535 GO:0010598	NAD(P)H dehydrogenase complex (plastoquinone); chloroplast; chloroplast thylakoid; chloroplast thylakoid membrane
Glyma.07G023300	AT1G80840	WRKY DNA-binding protein 40	WRKY	GO:0000165 GO:0002237 GO:0002679 GO:0006355 GO:0006612 GO:0006944 GO:0009595 GO:0009611 GO:0009612 GO:0009620 GO:0009646 GO:0009695 GO:0009697 GO:0009723 GO:0009738 GO:0009751 GO:0009753 GO:0009862 GO:0009863 GO:0009867 GO:0009873 GO:0010200 GO:0010310 GO:0010363 GO:0016045 GO:0030968 GO:0031347 GO:0031348 GO:0035556 GO:0042742 GO:0043069 GO:0043900 GO:0050691 GO:0050776 GO:0050832	MAPK cascade; abscisic acid mediated signaling pathway; cellular membrane fusion; defense response to bacterium; defense response to fungus; detection of bacterium; detection of biotic stimulus; endoplasmic reticulum unfolded protein response; ethylene mediated signaling pathway; intracellular signal transduction; jasmonic acid biosynthetic process; jasmonic acid mediated signaling pathway; negat…	GO:0003700 GO:0005515 GO:0043565	protein binding; sequence-specific DNA binding; sequence-specific DNA binding transcription factor activity	GO:0005634	nucleus
Glyma.07G023700	AT1G15950	cinnamoyl coa reductase 1		GO:0006623 GO:0007623 GO:0009409 GO:0009809	circadian rhythm; lignin biosynthetic process; protein targeting to vacuole; response to cold	GO:0000166 GO:0003824 GO:0016621 GO:0050662	catalytic activity; cinnamoyl-CoA reductase activity; coenzyme binding; nucleotide binding	GO:0005737 GO:0005829	cytoplasm; cytosol
Glyma.07G026900	AT1G80760	NOD26-like intrinsic protein 6;1		GO:0006810 GO:0010264 GO:0046713 GO:0080029	borate transport; cellular response to boron-containing substance levels; myo-inositol hexakisphosphate biosynthetic process; transport	GO:0005215 GO:0015168 GO:0015204 GO:0015250 GO:0046715	borate transmembrane transporter activity; glycerol transmembrane transporter activity; transporter activity; urea transmembrane transporter activity; water channel activity	GO:0005886 GO:0016020	membrane; plasma membrane
Glyma.07G027200	AT4G37850	basic helix-loop-helix (bHLH) DNA-binding superfamily protein	bHLH	GO:0006355	regulation of transcription, DNA-dependent	GO:0003677 GO:0003700	DNA binding; sequence-specific DNA binding transcription factor activity	GO:0005634	nucleus
Glyma.07G027400	AT4G37850	basic helix-loop-helix (bHLH) DNA-binding superfamily protein	bHLH	GO:0006355	regulation of transcription, DNA-dependent	GO:0003677 GO:0003700	DNA binding; sequence-specific DNA binding transcription factor activity	GO:0005634	nucleus
Glyma.07G035200	AT1G72790	hydroxyproline-rich glycoprotein family protein		GO:0008150	biological process	GO:0003674	molecular function	GO:0005634 GO:0005829 GO:0005886	cytosol; nucleus; plasma membrane
Glyma.07G039800	AT5G07990	Cytochrome P450 superfamily protein		GO:0009411 GO:0009718 GO:0009733 GO:0009744 GO:0009813 GO:0010224 GO:0055114	anthocyanin-containing compound biosynthetic process; flavonoid biosynthetic process; oxidation-reduction process; response to UV; response to UV-B; response to auxin stimulus; response to sucrose stimulus	GO:0005506 GO:0009055 GO:0016705 GO:0016711 GO:0019825 GO:0020037	electron carrier activity; flavonoid 3'-monooxygenase activity; heme binding; iron ion binding; oxidoreductase activity, acting on paired donors, with incorporation or reduction of molecular oxygen; oxygen binding	GO:0005576	extracellular region
Glyma.07G041400	AT1G72450	jasmonate-zim-domain protein 6		GO:0009611 GO:0009620 GO:0009694 GO:0009695 GO:0009753 GO:0009867	jasmonic acid biosynthetic process; jasmonic acid mediated signaling pathway; jasmonic acid metabolic process; response to fungus; response to jasmonic acid stimulus; response to wounding	GO:0005515	protein binding	GO:0005634	nucleus
Glyma.07G043000	AT1G54070	Dormancy/auxin associated family protein		GO:0008150	biological process	GO:0003674	molecular function	GO:0005634	nucleus
Glyma.07G049400	AT5G24470	pseudo-response regulator 5		GO:0000160 GO:0005982 GO:0006355 GO:0007623 GO:0009639 GO:0009640 GO:0010114 GO:0010218 GO:0042752 GO:0045892 GO:0048574 GO:0051170	circadian rhythm; long-day photoperiodism, flowering; negative regulation of transcription, DNA-dependent; nuclear import; phosphorelay signal transduction system; photomorphogenesis; regulation of circadian rhythm; regulation of transcription, DNA-dependent; response to far red light; response to red light; response to red or far red light; starch metabolic process	GO:0000156 GO:0003677	DNA binding; phosphorelay response regulator activity	GO:0005634	nucleus
Glyma.07G051200	NA	NA		NA	NA	NA	NA	NA	NA
Glyma.07G055300	AT1G01300	Eukaryotic aspartyl protease family protein		GO:0006508 GO:0009664 GO:0042545 GO:0080167	cell wall modification; plant-type cell wall organization; proteolysis; response to karrikin	GO:0004190	aspartic-type endopeptidase activity	GO:0005576 GO:0009505 GO:0016020	extracellular region; membrane; plant-type cell wall
Glyma.07G071300	AT1G01710	Acyl-CoA thioesterase family protein		GO:0006637	acyl-CoA metabolic process	GO:0030551 GO:0047617	acyl-CoA hydrolase activity; cyclic nucleotide binding	GO:0005777	peroxisome
Glyma.07G089400	AT1G73920	alpha/beta-Hydrolases superfamily protein		GO:0006114 GO:0006629	glycerol biosynthetic process; lipid metabolic process	GO:0016298	lipase activity	GO:0005576	extracellular region
Glyma.07G090400	NA	NA		NA	NA	NA	NA	NA	NA
Glyma.07G094500	AT5G38260	Protein kinase superfamily protein		GO:0006468	protein phosphorylation	GO:0004672 GO:0004674 GO:0005524 GO:0016301 GO:0016772	ATP binding; kinase activity; protein kinase activity; protein serine/threonine kinase activity; transferase activity, transferring phosphorus-containing groups	GO:0005886	plasma membrane
Glyma.07G095000	AT5G38260	Protein kinase superfamily protein		GO:0006468	protein phosphorylation	GO:0004672 GO:0004674 GO:0005524 GO:0016301 GO:0016772	ATP binding; kinase activity; protein kinase activity; protein serine/threonine kinase activity; transferase activity, transferring phosphorus-containing groups	GO:0005886	plasma membrane
Glyma.07G095200	AT5G38260	Protein kinase superfamily protein		GO:0006468	protein phosphorylation	GO:0004672 GO:0004674 GO:0005524 GO:0016301 GO:0016772	ATP binding; kinase activity; protein kinase activity; protein serine/threonine kinase activity; transferase activity, transferring phosphorus-containing groups	GO:0005886	plasma membrane
Glyma.07G095900	AT1G18390	Protein kinase superfamily protein		GO:0002679 GO:0006468 GO:0006984 GO:0009407 GO:0010200 GO:0010583 GO:0034976	ER-nucleus signaling pathway; protein phosphorylation; respiratory burst involved in defense response; response to chitin; response to cyclopentenone; response to endoplasmic reticulum stress; toxin catabolic process	GO:0004672 GO:0004674 GO:0004713 GO:0005524 GO:0016301 GO:0016772	ATP binding; kinase activity; protein kinase activity; protein serine/threonine kinase activity; protein tyrosine kinase activity; transferase activity, transferring phosphorus-containing groups	GO:0005576 GO:0005886	extracellular region; plasma membrane
Glyma.07G096100	AT1G18390	Protein kinase superfamily protein		GO:0002679 GO:0006468 GO:0006984 GO:0009407 GO:0010200 GO:0010583 GO:0034976	ER-nucleus signaling pathway; protein phosphorylation; respiratory burst involved in defense response; response to chitin; response to cyclopentenone; response to endoplasmic reticulum stress; toxin catabolic process	GO:0004672 GO:0004674 GO:0004713 GO:0005524 GO:0016301 GO:0016772	ATP binding; kinase activity; protein kinase activity; protein serine/threonine kinase activity; protein tyrosine kinase activity; transferase activity, transferring phosphorus-containing groups	GO:0005576 GO:0005886	extracellular region; plasma membrane
Glyma.07G097000	AT1G19670	chlorophyllase 1		GO:0000165 GO:0006355 GO:0006612 GO:0009617 GO:0009862 GO:0009867 GO:0010310 GO:0010363 GO:0015996 GO:0031348 GO:0035304 GO:0042742 GO:0050832	MAPK cascade; chlorophyll catabolic process; defense response to bacterium; defense response to fungus; jasmonic acid mediated signaling pathway; negative regulation of defense response; protein targeting to membrane; regulation of hydrogen peroxide metabolic process; regulation of plant-type hypersensitive response; regulation of protein dephosphorylation; regulation of transcription, DNA-depend…	GO:0047746	chlorophyllase activity	GO:0005773 GO:0009507	chloroplast; vacuole
Glyma.07G097700	AT1G73760	RING/U-box superfamily protein		NA	NA	GO:0008270	zinc ion binding	GO:0005634	nucleus
Glyma.07G108900	AT2G45050	GATA transcription factor 2	GATA	GO:0006355 GO:0009416 GO:0045893	positive regulation of transcription, DNA-dependent; regulation of transcription, DNA-dependent; response to light stimulus	GO:0003677 GO:0003700 GO:0008270 GO:0043565	DNA binding; sequence-specific DNA binding; sequence-specific DNA binding transcription factor activity; zinc ion binding	GO:0005634	nucleus
Glyma.07G125600	AT5G56550	oxidative stress 3		GO:0006979 GO:0046686	response to cadmium ion; response to oxidative stress	GO:0003674	molecular function	GO:0005634 GO:0016607	nuclear speck; nucleus
Glyma.07G136800	AT2G37750	NA		GO:0008150	biological process	GO:0003674	molecular function	NA	NA
Glyma.07G144200	AT3G54110	plant uncoupling mitochondrial protein 1		GO:0006007 GO:0006810 GO:0006839 GO:0009744 GO:0009749 GO:0009750 GO:0009853 GO:0015979	glucose catabolic process; mitochondrial transport; photorespiration; photosynthesis; response to fructose stimulus; response to glucose stimulus; response to sucrose stimulus; transport	GO:0017077	oxidative phosphorylation uncoupler activity	GO:0005739 GO:0005743 GO:0005774 GO:0009506 GO:0009507 GO:0031966	chloroplast; mitochondrial inner membrane; mitochondrial membrane; mitochondrion; plasmodesma; vacuolar membrane
Glyma.07G147100	NA	NA		NA	NA	NA	NA	NA	NA
Glyma.07G150900	AT5G05600	2-oxoglutarate (2OG) and Fe(II)-dependent oxygenase superfamily protein		GO:0009611 GO:0009620 GO:0009695 GO:0009753 GO:0009867 GO:0055114 GO:0080167	jasmonic acid biosynthetic process; jasmonic acid mediated signaling pathway; oxidation-reduction process; response to fungus; response to jasmonic acid stimulus; response to karrikin; response to wounding	GO:0005506 GO:0016491 GO:0016706	iron ion binding; oxidoreductase activity; oxidoreductase activity, acting on paired donors, with incorporation or reduction of molecular oxygen, 2-oxoglutarate as one donor, and incorporation of one atom each of oxygen into both donors	GO:0005737	cytoplasm
Glyma.07G151300	AT5G05580	fatty acid desaturase 8		GO:0006629 GO:0006633 GO:0009266 GO:0055114	fatty acid biosynthetic process; lipid metabolic process; oxidation-reduction process; response to temperature stimulus	GO:0016717 GO:0042389	omega-3 fatty acid desaturase activity; oxidoreductase activity, acting on paired donors, with oxidation of a pair of donors resulting in the reduction of molecular oxygen to two molecules of water	GO:0009507 GO:0009941	chloroplast; chloroplast envelope
Glyma.07G153800	AT2G38290	ammonium transporter 2		GO:0000165 GO:0002237 GO:0006612 GO:0006820 GO:0006862 GO:0006888 GO:0006944 GO:0006995 GO:0007154 GO:0009409 GO:0009581 GO:0009595 GO:0009624 GO:0009627 GO:0009697 GO:0009738 GO:0009744 GO:0009749 GO:0009750 GO:0009862 GO:0009863 GO:0009867 GO:0010200 GO:0010310 GO:0010363 GO:0015695 GO:0015696 GO:0015802 GO:0030968 GO:0031347 GO:0031348 GO:0042742 GO:0043069 GO:0043090 GO:0043269 GO:0043900 GO:…	ER to Golgi vesicle-mediated transport; MAPK cascade; abscisic acid mediated signaling pathway; amino acid import; ammonium transport; anion transport; basic amino acid transport; cell communication; cellular membrane fusion; cellular response to nitrogen starvation; defense response to bacterium; defense response to fungus; detection of biotic stimulus; detection of external stimulus; endoplasmi…	GO:0008519 GO:0015398	ammonium transmembrane transporter activity; high affinity secondary active ammonium transmembrane transporter activity	GO:0005737 GO:0005886 GO:0009506	cytoplasm; plasma membrane; plasmodesma
Glyma.07G162900	AT5G42650	allene oxide synthase		GO:0000096 GO:0000165 GO:0006546 GO:0006569 GO:0006612 GO:0006636 GO:0006733 GO:0006766 GO:0006952 GO:0008652 GO:0009072 GO:0009106 GO:0009108 GO:0009117 GO:0009416 GO:0009595 GO:0009611 GO:0009620 GO:0009684 GO:0009694 GO:0009695 GO:0009697 GO:0009753 GO:0009862 GO:0009867 GO:0010200 GO:0010310 GO:0010363 GO:0015994 GO:0019216 GO:0019288 GO:0019373 GO:0019748 GO:0019761 GO:0031348 GO:0031407 GO:…	MAPK cascade; aromatic amino acid family metabolic process; cellular amino acid biosynthetic process; chlorophyll metabolic process; coenzyme biosynthetic process; defense response; defense response to bacterium; defense response to fungus; detection of biotic stimulus; epoxygenase P450 pathway; glucosinolate biosynthetic process; glycine catabolic process; indoleacetic acid biosynthetic process;…	GO:0005506 GO:0009055 GO:0009978 GO:0016705 GO:0016836 GO:0019825 GO:0020037	allene oxide synthase activity; electron carrier activity; heme binding; hydro-lyase activity; iron ion binding; oxidoreductase activity, acting on paired donors, with incorporation or reduction of molecular oxygen; oxygen binding	GO:0005739 GO:0009507 GO:0009534 GO:0009535 GO:0009579 GO:0009941 GO:0010287 GO:0016020	chloroplast; chloroplast envelope; chloroplast thylakoid; chloroplast thylakoid membrane; membrane; mitochondrion; plastoglobule; thylakoid
Glyma.07G163200	AT2G23460	extra-large G-protein 1		GO:0006184 GO:0007165 GO:0007186 GO:0007188 GO:0009737 GO:0009744 GO:0009749 GO:0009750 GO:0010555 GO:2000067	G-protein coupled receptor signaling pathway; GTP catabolic process; adenylate cyclase-modulating G-protein coupled receptor signaling pathway; regulation of root morphogenesis; response to abscisic acid stimulus; response to fructose stimulus; response to glucose stimulus; response to mannitol stimulus; response to sucrose stimulus; signal transduction	GO:0001664 GO:0003924 GO:0004871 GO:0019001 GO:0031683	G-protein beta/gamma-subunit complex binding; G-protein coupled receptor binding; GTPase activity; guanyl nucleotide binding; signal transducer activity	GO:0005634 GO:0005834 GO:0005886 GO:0031234	extrinsic to internal side of plasma membrane; heterotrimeric G-protein complex; nucleus; plasma membrane
Glyma.07G171600	AT3G19860	basic helix-loop-helix (bHLH) DNA-binding superfamily protein	bHLH	GO:0006635 GO:0016558	fatty acid beta-oxidation; protein import into peroxisome matrix	GO:0003677 GO:0003700	DNA binding; sequence-specific DNA binding transcription factor activity	GO:0005634	nucleus
Glyma.07G183900	AT5G10530	Concanavalin A-like lectin protein kinase family protein		GO:0006468	protein phosphorylation	GO:0004672 GO:0004674 GO:0005524 GO:0016301 GO:0016772	ATP binding; kinase activity; protein kinase activity; protein serine/threonine kinase activity; transferase activity, transferring phosphorus-containing groups	GO:0005886	plasma membrane
Glyma.07G188800	AT4G21390	S-locus lectin protein kinase family protein		GO:0002679 GO:0006468 GO:0006612 GO:0006944 GO:0006979 GO:0009611 GO:0009863 GO:0010200 GO:0010363 GO:0043069 GO:0048544 GO:0050832	cellular membrane fusion; defense response to fungus; negative regulation of programmed cell death; protein phosphorylation; protein targeting to membrane; recognition of pollen; regulation of plant-type hypersensitive response; respiratory burst involved in defense response; response to chitin; response to oxidative stress; response to wounding; salicylic acid mediated signaling pathway	GO:0004672 GO:0004674 GO:0005524 GO:0016772 GO:0030246	ATP binding; carbohydrate binding; protein kinase activity; protein serine/threonine kinase activity; transferase activity, transferring phosphorus-containing groups	GO:0005886	plasma membrane
Glyma.07G189400	AT4G21450	PapD-like superfamily protein		GO:0006499 GO:0006623 GO:0008150 GO:0032880	N-terminal protein myristoylation; biological process; protein targeting to vacuole; regulation of protein localization	GO:0005198	structural molecule activity	GO:0005634 GO:0005886	nucleus; plasma membrane
Glyma.07G189500	AT1G11260	sugar transporter 1		GO:0009627 GO:0015749 GO:0031347	monosaccharide transport; regulation of defense response; systemic acquired resistance	GO:0005351 GO:0015144 GO:0015145	carbohydrate transmembrane transporter activity; monosaccharide transmembrane transporter activity; sugar:hydrogen symporter activity	GO:0005634 GO:0005737 GO:0005773 GO:0005886 GO:0009506 GO:0016020	cytoplasm; membrane; nucleus; plasma membrane; plasmodesma; vacuole
Glyma.07G190100	AT1G61340	F-box family protein		GO:0006970 GO:0009611 GO:0009617 GO:0009651 GO:0009693 GO:0009737 GO:0009751 GO:0009753 GO:0009961 GO:0010200	ethylene biosynthetic process; response to 1-Aminocyclopropane-1-carboxylic Acid; response to abscisic acid stimulus; response to bacterium; response to chitin; response to jasmonic acid stimulus; response to osmotic stress; response to salicylic acid stimulus; response to salt stress; response to wounding	GO:0003674	molecular function	GO:0005634	nucleus
Glyma.07G196800	AT1G17420	lipoxygenase 3		GO:0006952 GO:0009555 GO:0009611 GO:0009620 GO:0009644 GO:0009693 GO:0009695 GO:0009753 GO:0009901 GO:0010200 GO:0034440 GO:0040007 GO:0048653 GO:0080086	anther dehiscence; anther development; defense response; ethylene biosynthetic process; growth; jasmonic acid biosynthetic process; lipid oxidation; pollen development; response to chitin; response to fungus; response to high light intensity; response to jasmonic acid stimulus; response to wounding; stamen filament development	GO:0016165	lipoxygenase activity	GO:0009507	chloroplast
Glyma.07G199500	AT1G28340	receptor like protein 4		GO:0007165	signal transduction	NA	NA	GO:0005768 GO:0005794 GO:0005802 GO:0005886	Golgi apparatus; endosome; plasma membrane; trans-Golgi network
Glyma.07G199800	AT1G28380	MAC/Perforin domain-containing protein		GO:0000165 GO:0002679 GO:0006612 GO:0006820 GO:0006862 GO:0006888 GO:0006944 GO:0006955 GO:0006984 GO:0008219 GO:0009595 GO:0009626 GO:0009627 GO:0009651 GO:0009697 GO:0009862 GO:0009863 GO:0009867 GO:0010200 GO:0010310 GO:0010337 GO:0010363 GO:0015696 GO:0015802 GO:0031347 GO:0031348 GO:0034976 GO:0042742 GO:0043069 GO:0043090 GO:0043269 GO:0043900 GO:0045087 GO:0050832 GO:0051707 GO:0052542	ER-nucleus signaling pathway; ER to Golgi vesicle-mediated transport; MAPK cascade; amino acid import; ammonium transport; anion transport; basic amino acid transport; cell death; cellular membrane fusion; defense response by callose deposition; defense response to bacterium; defense response to fungus; detection of biotic stimulus; immune response; innate immune response; jasmonic acid mediated …	GO:0003674	molecular function	GO:0005634	nucleus
Glyma.07G208700	AT2G15890	maternal effect embryo arrest 14		GO:0009793 GO:0050832	defense response to fungus; embryo development ending in seed dormancy	GO:0003674	molecular function	GO:0005634 GO:0009507	chloroplast; nucleus
Glyma.07G215600	AT5G67210	Protein of unknown function (DUF579)		GO:0009834 GO:0010413 GO:0045492	glucuronoxylan metabolic process; secondary cell wall biogenesis; xylan biosynthetic process	GO:0003674	molecular function	GO:0005794	Golgi apparatus
Glyma.07G243900	AT1G24020	MLP-like protein 423		GO:0006952 GO:0016556	defense response; mRNA modification	NA	NA	GO:0009507 GO:0016020	chloroplast; membrane
Glyma.07G266200	AT3G02870	Inositol monophosphatase family protein		GO:0006021 GO:0006790 GO:0009409 GO:0010264 GO:0019243 GO:0019761 GO:0019853 GO:0046854 GO:0080167	L-ascorbic acid biosynthetic process; glucosinolate biosynthetic process; inositol biosynthetic process; methylglyoxal catabolic process to D-lactate; myo-inositol hexakisphosphate biosynthetic process; phosphatidylinositol phosphorylation; response to cold; response to karrikin; sulfur compound metabolic process	GO:0008441 GO:0008934 GO:0010347	3'(2'),5'-bisphosphate nucleotidase activity; L-galactose-1-phosphate phosphatase activity; inositol monophosphate 1-phosphatase activity	GO:0005737 GO:0005829 GO:0005886	cytoplasm; cytosol; plasma membrane
Glyma.07G268400	AT5G47710	Calcium-dependent lipid-binding (CaLB domain) family protein		GO:0008150	biological process	GO:0003674	molecular function	GO:0005773 GO:0005886	plasma membrane; vacuole
Glyma.08G002100	AT3G52430	alpha/beta-Hydrolases superfamily protein		GO:0000165 GO:0001666 GO:0002213 GO:0002679 GO:0006355 GO:0006612 GO:0006629 GO:0006944 GO:0007154 GO:0009409 GO:0009581 GO:0009595 GO:0009617 GO:0009625 GO:0009627 GO:0009697 GO:0009738 GO:0009816 GO:0009862 GO:0009863 GO:0009867 GO:0010150 GO:0010200 GO:0010310 GO:0010363 GO:0010618 GO:0010942 GO:0030968 GO:0031347 GO:0031348 GO:0035304 GO:0042742 GO:0043069 GO:0043900 GO:0045087 GO:0045088 GO:…	MAPK cascade; abscisic acid mediated signaling pathway; aerenchyma formation; cell communication; cellular membrane fusion; defense response to bacterium; defense response to bacterium, incompatible interaction; defense response to fungus; defense response to insect; detection of biotic stimulus; detection of external stimulus; endoplasmic reticulum unfolded protein response; innate immune respon…	GO:0004806 GO:0005515 GO:0016298	lipase activity; protein binding; triglyceride lipase activity	GO:0005634	nucleus
Glyma.08G010400	AT5G50760	SAUR-like auxin-responsive protein family		GO:0009733 GO:0010167 GO:0015706	nitrate transport; response to auxin stimulus; response to nitrate	GO:0003674	molecular function	GO:0009507	chloroplast
Glyma.08G011300	AT5G13080	WRKY DNA-binding protein 75	WRKY	GO:0006355 GO:0009723 GO:0016036 GO:0019375 GO:0032107 GO:0042631 GO:0043620 GO:0048527	cellular response to phosphate starvation; cellular response to water deprivation; galactolipid biosynthetic process; lateral root development; regulation of DNA-dependent transcription in response to stress; regulation of response to nutrient levels; regulation of transcription, DNA-dependent; response to ethylene stimulus	GO:0003700 GO:0043565	sequence-specific DNA binding; sequence-specific DNA binding transcription factor activity	GO:0005634	nucleus
Glyma.08G021900	AT4G11070	WRKY family transcription factor	WRKY	GO:0006355	regulation of transcription, DNA-dependent	GO:0003700 GO:0043565	sequence-specific DNA binding; sequence-specific DNA binding transcription factor activity	GO:0005634	nucleus
Glyma.08G042100	AT1G25340	myb domain protein 116	MYB	GO:0006355	regulation of transcription, DNA-dependent	GO:0003677 GO:0003700	DNA binding; sequence-specific DNA binding transcription factor activity	GO:0005634	nucleus
Glyma.08G044400	AT1G73805	Calmodulin binding protein-like		GO:0000165 GO:0001666 GO:0002237 GO:0006355 GO:0006612 GO:0009581 GO:0009595 GO:0009617 GO:0009627 GO:0009697 GO:0009814 GO:0009862 GO:0009863 GO:0009867 GO:0010112 GO:0010200 GO:0010310 GO:0010363 GO:0031347 GO:0031348 GO:0035304 GO:0042742 GO:0043900 GO:0045087 GO:0045088 GO:0050832 GO:0080142	MAPK cascade; defense response, incompatible interaction; defense response to bacterium; defense response to fungus; detection of biotic stimulus; detection of external stimulus; innate immune response; jasmonic acid mediated signaling pathway; negative regulation of defense response; protein targeting to membrane; regulation of defense response; regulation of hydrogen peroxide metabolic process;…	GO:0003700 GO:0005516 GO:0043565	calmodulin binding; sequence-specific DNA binding; sequence-specific DNA binding transcription factor activity	GO:0005634	nucleus
Glyma.08G050400	AT1G05010	ethylene-forming enzyme		GO:0000165 GO:0006612 GO:0009595 GO:0009620 GO:0009693 GO:0009697 GO:0009862 GO:0009867 GO:0010200 GO:0010310 GO:0010363 GO:0030003 GO:0031348 GO:0042742 GO:0043900 GO:0050832 GO:0055114 GO:0070838 GO:0071398	MAPK cascade; cellular cation homeostasis; cellular response to fatty acid; defense response to bacterium; defense response to fungus; detection of biotic stimulus; divalent metal ion transport; ethylene biosynthetic process; jasmonic acid mediated signaling pathway; negative regulation of defense response; oxidation-reduction process; protein targeting to membrane; regulation of hydrogen peroxid…	GO:0009815 GO:0016491 GO:0016706	1-aminocyclopropane-1-carboxylate oxidase activity; oxidoreductase activity; oxidoreductase activity, acting on paired donors, with incorporation or reduction of molecular oxygen, 2-oxoglutarate as one donor, and incorporation of one atom each of oxygen into both donors	GO:0005737	cytoplasm
Glyma.08G058900	AT1G61340	F-box family protein		GO:0006970 GO:0009611 GO:0009617 GO:0009651 GO:0009693 GO:0009737 GO:0009751 GO:0009753 GO:0009961 GO:0010200	ethylene biosynthetic process; response to 1-Aminocyclopropane-1-carboxylic Acid; response to abscisic acid stimulus; response to bacterium; response to chitin; response to jasmonic acid stimulus; response to osmotic stress; response to salicylic acid stimulus; response to salt stress; response to wounding	GO:0003674	molecular function	GO:0005634	nucleus
Glyma.08G064700	AT1G58290	Glutamyl-tRNA reductase family protein		GO:0000302 GO:0006779 GO:0006783 GO:0009416 GO:0010039 GO:0015995 GO:0033014 GO:0055072 GO:0055114	chlorophyll biosynthetic process; heme biosynthetic process; iron ion homeostasis; oxidation-reduction process; porphyrin-containing compound biosynthetic process; response to iron ion; response to light stimulus; response to reactive oxygen species; tetrapyrrole biosynthetic process	GO:0000166 GO:0005515 GO:0008883 GO:0050661	NADP binding; glutamyl-tRNA reductase activity; nucleotide binding; protein binding	GO:0009507	chloroplast
Glyma.08G071300	AT5G64260	EXORDIUM like 2		GO:0008150 GO:0046685	biological process; response to arsenic-containing substance	GO:0003674	molecular function	GO:0005618 GO:0005794 GO:0005829 GO:0009505 GO:0009506 GO:0009507	Golgi apparatus; cell wall; chloroplast; cytosol; plant-type cell wall; plasmodesma
Glyma.08G072400	AT4G33520	P-type ATP-ase 1		GO:0006754 GO:0006812 GO:0008152 GO:0009767 GO:0030001 GO:0035434 GO:0046034	ATP biosynthetic process; ATP metabolic process; cation transport; copper ion transmembrane transport; metabolic process; metal ion transport; photosynthetic electron transport chain	GO:0000166 GO:0003824 GO:0005375 GO:0005524 GO:0015662 GO:0043682 GO:0046872	ATP binding; ATPase activity, coupled to transmembrane movement of ions, phosphorylative mechanism; catalytic activity; copper-transporting ATPase activity; copper ion transmembrane transporter activity; metal ion binding; nucleotide binding	GO:0005886 GO:0009507 GO:0009536 GO:0009570 GO:0009941 GO:0016020 GO:0016021	chloroplast; chloroplast envelope; chloroplast stroma; integral to membrane; membrane; plasma membrane; plastid
Glyma.08G074100	AT5G64080	Bifunctional inhibitor/lipid-transfer protein/seed storage 2S albumin superfamily protein		GO:0006869	lipid transport	GO:0008289	lipid binding	GO:0005886 GO:0031225 GO:0046658	anchored to membrane; anchored to plasma membrane; plasma membrane
Glyma.08G074200	AT4G13830	DNAJ-like 20		GO:0006457 GO:0015996	chlorophyll catabolic process; protein folding	GO:0031072	heat shock protein binding	GO:0005634 GO:0009507	chloroplast; nucleus
Glyma.08G091900	AT2G30070	potassium transporter 1		GO:0006813 GO:0071805	potassium ion transmembrane transport; potassium ion transport	GO:0015079	potassium ion transmembrane transporter activity	GO:0005886 GO:0016020	membrane; plasma membrane
Glyma.08G096500	AT1G30135	jasmonate-zim-domain protein 8		GO:0008150 GO:0009611 GO:0009620 GO:0009693 GO:0009695 GO:0009753 GO:0009867	biological process; ethylene biosynthetic process; jasmonic acid biosynthetic process; jasmonic acid mediated signaling pathway; response to fungus; response to jasmonic acid stimulus; response to wounding	GO:0005515	protein binding	GO:0005634	nucleus
Glyma.08G104600	AT1G27930	Protein of unknown function (DUF579)		GO:0006857 GO:0008150	biological process; oligopeptide transport	GO:0005515	protein binding	GO:0005768 GO:0005794 GO:0005802	Golgi apparatus; endosome; trans-Golgi network
Glyma.08G109300	AT5G13930	Chalcone and stilbene synthase family protein		GO:0006979 GO:0008152 GO:0009058 GO:0009411 GO:0009611 GO:0009629 GO:0009715 GO:0009718 GO:0009733 GO:0009744 GO:0009753 GO:0009813 GO:0009926 GO:0010224 GO:0031540	anthocyanin-containing compound biosynthetic process; auxin polar transport; biosynthetic process; chalcone biosynthetic process; flavonoid biosynthetic process; metabolic process; regulation of anthocyanin biosynthetic process; response to UV; response to UV-B; response to auxin stimulus; response to gravity; response to jasmonic acid stimulus; response to oxidative stress; response to sucrose s…	GO:0003824 GO:0005515 GO:0016210 GO:0016746 GO:0016747	catalytic activity; naringenin-chalcone synthase activity; protein binding; transferase activity, transferring acyl groups; transferase activity, transferring acyl groups other than amino-acyl groups	GO:0005634 GO:0005737 GO:0005783 GO:0009705	cytoplasm; endoplasmic reticulum; nucleus; plant-type vacuole membrane
Glyma.08G109500	AT5G13930	Chalcone and stilbene synthase family protein		GO:0006979 GO:0008152 GO:0009058 GO:0009411 GO:0009611 GO:0009629 GO:0009715 GO:0009718 GO:0009733 GO:0009744 GO:0009753 GO:0009813 GO:0009926 GO:0010224 GO:0031540	anthocyanin-containing compound biosynthetic process; auxin polar transport; biosynthetic process; chalcone biosynthetic process; flavonoid biosynthetic process; metabolic process; regulation of anthocyanin biosynthetic process; response to UV; response to UV-B; response to auxin stimulus; response to gravity; response to jasmonic acid stimulus; response to oxidative stress; response to sucrose s…	GO:0003824 GO:0005515 GO:0016210 GO:0016746 GO:0016747	catalytic activity; naringenin-chalcone synthase activity; protein binding; transferase activity, transferring acyl groups; transferase activity, transferring acyl groups other than amino-acyl groups	GO:0005634 GO:0005737 GO:0005783 GO:0009705	cytoplasm; endoplasmic reticulum; nucleus; plant-type vacuole membrane
Glyma.08G115900	AT2G34140	Dof-type zinc finger DNA-binding family protein	Dof	GO:0006355	regulation of transcription, DNA-dependent	GO:0003677 GO:0003700 GO:0008270	DNA binding; sequence-specific DNA binding transcription factor activity; zinc ion binding	GO:0005634	nucleus
Glyma.08G118700	AT2G29420	glutathione S-transferase tau 7		GO:0009407 GO:0009751 GO:0010583	response to cyclopentenone; response to salicylic acid stimulus; toxin catabolic process	GO:0004364	glutathione transferase activity	GO:0005737 GO:0005829	cytoplasm; cytosol
Glyma.08G130800	AT1G67800	Copine (Calcium-dependent phospholipid-binding protein) family		GO:0006499 GO:0009697 GO:0009863 GO:0031348 GO:0045087	N-terminal protein myristoylation; innate immune response; negative regulation of defense response; salicylic acid biosynthetic process; salicylic acid mediated signaling pathway	GO:0008270	zinc ion binding	GO:0005886	plasma membrane
Glyma.08G135200	AT5G64220	Calmodulin-binding transcription activator protein with CG-1 and Ankyrin domains	CAMTA	GO:0006355 GO:0009409	regulation of transcription, DNA-dependent; response to cold	GO:0003677 GO:0005516	DNA binding; calmodulin binding	GO:0005634	nucleus
Glyma.08G136200	AT5G65020	annexin 2		GO:0006084 GO:0009408 GO:0009409 GO:0009414 GO:0009651 GO:0015774 GO:0016126 GO:0016132	acetyl-CoA metabolic process; brassinosteroid biosynthetic process; polysaccharide transport; response to cold; response to heat; response to salt stress; response to water deprivation; sterol biosynthetic process	GO:0005509 GO:0005544	calcium-dependent phospholipid binding; calcium ion binding	GO:0005634 GO:0005829 GO:0009507 GO:0009579 GO:0009986 GO:0048046	apoplast; cell surface; chloroplast; cytosol; nucleus; thylakoid
Glyma.08G137500	AT5G65140	Haloacid dehalogenase-like hydrolase (HAD) superfamily protein		GO:0005992 GO:0008152 GO:0046686	metabolic process; response to cadmium ion; trehalose biosynthetic process	GO:0003824 GO:0004805	catalytic activity; trehalose-phosphatase activity	GO:0005634 GO:0005737	cytoplasm; nucleus
Glyma.08G141900	NA	NA		NA	NA	NA	NA	NA	NA
Glyma.08G142400	AT5G64810	WRKY DNA-binding protein 51	WRKY	GO:0006355 GO:0009867 GO:0042742 GO:0050832	defense response to bacterium; defense response to fungus; jasmonic acid mediated signaling pathway; regulation of transcription, DNA-dependent	GO:0003700 GO:0043565	sequence-specific DNA binding; sequence-specific DNA binding transcription factor activity	GO:0005634	nucleus
Glyma.08G153700	NA	NA		NA	NA	NA	NA	NA	NA
Glyma.08G164400	AT3G12750	zinc transporter 1 precursor		GO:0006826 GO:0006829 GO:0006833 GO:0010043 GO:0010106 GO:0030001 GO:0055085 GO:0071577	cellular response to iron ion starvation; iron ion transport; metal ion transport; response to zinc ion; transmembrane transport; water transport; zinc ion transmembrane transport; zinc ion transport	GO:0005385 GO:0046873	metal ion transmembrane transporter activity; zinc ion transmembrane transporter activity	GO:0005886 GO:0016020 GO:0016021	integral to membrane; membrane; plasma membrane
Glyma.08G171400	AT2G32210	NA		GO:0008150	biological process	GO:0003674	molecular function	NA	NA
Glyma.08G174700	AT1G78380	glutathione S-transferase TAU 19		GO:0006094 GO:0006096 GO:0006635 GO:0006979 GO:0009407 GO:0009651 GO:0010583 GO:0016036 GO:0019375 GO:0042631 GO:0043161 GO:0046686 GO:0051788 GO:0080129	cellular response to phosphate starvation; cellular response to water deprivation; fatty acid beta-oxidation; galactolipid biosynthetic process; gluconeogenesis; glycolysis; proteasomal ubiquitin-dependent protein catabolic process; proteasome core complex assembly; response to cadmium ion; response to cyclopentenone; response to misfolded protein; response to oxidative stress; response to salt s…	GO:0004364 GO:0043295	glutathione binding; glutathione transferase activity	GO:0005737 GO:0005774 GO:0005829 GO:0005886 GO:0009507 GO:0009570	chloroplast; chloroplast stroma; cytoplasm; cytosol; plasma membrane; vacuolar membrane
Glyma.08G177300	AT5G64300	GTP cyclohydrolase II		GO:0009231 GO:0048767	riboflavin biosynthetic process; root hair elongation	GO:0003935 GO:0008686	3,4-dihydroxy-2-butanone-4-phosphate synthase activity; GTP cyclohydrolase II activity	GO:0009507 GO:0009570 GO:0016020	chloroplast; chloroplast stroma; membrane
Glyma.08G178200	AT1G22360	UDP-glucosyl transferase 85A2		GO:0008152	metabolic process	GO:0008194 GO:0015020 GO:0016757 GO:0016758	UDP-glycosyltransferase activity; glucuronosyltransferase activity; transferase activity, transferring glycosyl groups; transferase activity, transferring hexosyl groups	GO:0005634	nucleus
Glyma.08G181000	AT2G22590	UDP-Glycosyltransferase superfamily protein		GO:0008152	metabolic process	GO:0016757 GO:0016758	transferase activity, transferring glycosyl groups; transferase activity, transferring hexosyl groups	GO:0005575	cellular component
Glyma.08G197500	AT2G25930	hydroxyproline-rich glycoprotein family protein		GO:0007623 GO:0009409 GO:0009585 GO:0009649 GO:0009733 GO:0009737 GO:0009826 GO:0009909 GO:0010031 GO:0010119 GO:0048573	circadian rhythm; circumnutation; entrainment of circadian clock; photoperiodism, flowering; red, far-red light phototransduction; regulation of flower development; regulation of stomatal movement; response to abscisic acid stimulus; response to auxin stimulus; response to cold; unidimensional cell growth	GO:0003700 GO:0008022	protein C-terminus binding; sequence-specific DNA binding transcription factor activity	GO:0005634	nucleus
Glyma.08G199800	AT4G26270	phosphofructokinase 3		GO:0006096 GO:0010053	glycolysis; root epidermal cell differentiation	GO:0003872 GO:0005524	6-phosphofructokinase activity; ATP binding	GO:0005737 GO:0005829 GO:0005945	6-phosphofructokinase complex; cytoplasm; cytosol
Glyma.08G200000	AT5G51260	HAD superfamily, subfamily IIIB acid phosphatase		NA	NA	GO:0003993	acid phosphatase activity	GO:0009507	chloroplast
Glyma.08G200100	AT4G25150	HAD superfamily, subfamily IIIB acid phosphatase		NA	NA	GO:0003993	acid phosphatase activity	GO:0009507	chloroplast
Glyma.08G203800	AT3G16190	Isochorismatase family protein		GO:0008152	metabolic process	GO:0003824	catalytic activity	GO:0005737	cytoplasm
Glyma.08G212900	AT3G15850	fatty acid desaturase 5		GO:0001676 GO:0002213 GO:0006629 GO:0006633 GO:0006636 GO:0006655 GO:0010205 GO:0015995 GO:0016117 GO:0019288 GO:0055114	carotenoid biosynthetic process; chlorophyll biosynthetic process; defense response to insect; fatty acid biosynthetic process; isopentenyl diphosphate biosynthetic process, mevalonate-independent pathway; lipid metabolic process; long-chain fatty acid metabolic process; oxidation-reduction process; phosphatidylglycerol biosynthetic process; photoinhibition; unsaturated fatty acid biosynthetic pr…	GO:0009979 GO:0016491 GO:0016717	16:0 monogalactosyldiacylglycerol desaturase activity; oxidoreductase activity; oxidoreductase activity, acting on paired donors, with oxidation of a pair of donors resulting in the reduction of molecular oxygen to two molecules of water	GO:0009507 GO:0009579	chloroplast; thylakoid
Glyma.08G218800	AT1G15980	NDH-dependent cyclic electron flow 1		GO:0006098 GO:0009773 GO:0010207 GO:0015979 GO:0016117	carotenoid biosynthetic process; pentose-phosphate shunt; photosynthesis; photosynthetic electron transport in photosystem I; photosystem II assembly	NA	NA	GO:0009507 GO:0009534 GO:0009535 GO:0010598	NAD(P)H dehydrogenase complex (plastoquinone); chloroplast; chloroplast thylakoid; chloroplast thylakoid membrane
Glyma.08G221300	AT1G51550	Kelch repeat-containing F-box family protein		GO:0006511 GO:0045892	negative regulation of transcription, DNA-dependent; ubiquitin-dependent protein catabolic process	GO:0004842	ubiquitin-protein ligase activity	GO:0005634	nucleus
Glyma.08G221600	AT3G21150	B-box 32		GO:0006355 GO:0009640 GO:0009785 GO:0009909 GO:0010017 GO:0010200 GO:0045892	blue light signaling pathway; negative regulation of transcription, DNA-dependent; photomorphogenesis; red or far-red light signaling pathway; regulation of flower development; regulation of transcription, DNA-dependent; response to chitin	GO:0003700 GO:0005515 GO:0008270	protein binding; sequence-specific DNA binding transcription factor activity; zinc ion binding	GO:0005634 GO:0005737	cytoplasm; nucleus
Glyma.08G230600	AT5G25610	BURP domain-containing protein		GO:0009269 GO:0009409 GO:0009651 GO:0009737	response to abscisic acid stimulus; response to cold; response to desiccation; response to salt stress	GO:0045735	nutrient reservoir activity	GO:0005576 GO:0005768 GO:0005794 GO:0005802	Golgi apparatus; endosome; extracellular region; trans-Golgi network
Glyma.08G249900	AT5G15650	reversibly glycosylated polypeptide 2		GO:0009651 GO:0030244 GO:0033356 GO:0046686 GO:0071555	UDP-L-arabinose metabolic process; cell wall organization; cellulose biosynthetic process; response to cadmium ion; response to salt stress	GO:0008466 GO:0016758 GO:0052691	UDP-arabinopyranose mutase activity; glycogenin glucosyltransferase activity; transferase activity, transferring hexosyl groups	GO:0005618 GO:0005634 GO:0016020 GO:0022626 GO:0030054	cell junction; cell wall; cytosolic ribosome; membrane; nucleus
Glyma.08G256600	AT1G13280	allene oxide cyclase 4		GO:0009695	jasmonic acid biosynthetic process	GO:0016853 GO:0046423	allene-oxide cyclase activity; isomerase activity	GO:0005886 GO:0009507	chloroplast; plasma membrane
Glyma.08G292000	AT1G51760	peptidase M20/M25/M40 family protein		GO:0006508 GO:0008152 GO:0009611	metabolic process; proteolysis; response to wounding	GO:0008237 GO:0010179 GO:0016787	IAA-Ala conjugate hydrolase activity; hydrolase activity; metallopeptidase activity	GO:0005783 GO:0005886 GO:0009507	chloroplast; endoplasmic reticulum; plasma membrane
Glyma.08G299900	AT2G46210	Fatty acid/sphingolipid desaturase		GO:0006629 GO:0006633 GO:0055114	fatty acid biosynthetic process; lipid metabolic process; oxidation-reduction process	GO:0005506 GO:0016491 GO:0016717 GO:0020037	heme binding; iron ion binding; oxidoreductase activity; oxidoreductase activity, acting on paired donors, with oxidation of a pair of donors resulting in the reduction of molecular oxygen to two molecules of water	NA	NA
Glyma.08G303700	AT5G17680	disease resistance protein (TIR-NBS-LRR class), putative		GO:0006952 GO:0007165	defense response; signal transduction	GO:0043531	ADP binding	GO:0005622	intracellular
Glyma.08G316500	AT3G20410	calmodulin-domain protein kinase 9		GO:0000165 GO:0006468 GO:0006499 GO:0006612 GO:0007154 GO:0007165 GO:0009409 GO:0009723 GO:0009738 GO:0009862 GO:0009867 GO:0010363 GO:0030968 GO:0031348 GO:0043069 GO:0050832	MAPK cascade; N-terminal protein myristoylation; abscisic acid mediated signaling pathway; cell communication; defense response to fungus; endoplasmic reticulum unfolded protein response; jasmonic acid mediated signaling pathway; negative regulation of defense response; negative regulation of programmed cell death; protein phosphorylation; protein targeting to membrane; regulation of plant-type h…	GO:0004672 GO:0004674 GO:0004683 GO:0005509 GO:0005524 GO:0016301 GO:0016772	ATP binding; calcium ion binding; calmodulin-dependent protein kinase activity; kinase activity; protein kinase activity; protein serine/threonine kinase activity; transferase activity, transferring phosphorus-containing groups	GO:0005634 GO:0005886	nucleus; plasma membrane
Glyma.08G321400	AT5G10770	Eukaryotic aspartyl protease family protein		GO:0006508	proteolysis	GO:0003677 GO:0004190	DNA binding; aspartic-type endopeptidase activity	GO:0005576	extracellular region
Glyma.08G328600	AT3G13130	NA		GO:0008150	biological process	GO:0003674	molecular function	GO:0009507	chloroplast
Glyma.08G336100	AT2G01870	NA		GO:0000023 GO:0008150 GO:0019252	biological process; maltose metabolic process; starch biosynthetic process	GO:0003674	molecular function	GO:0005739 GO:0009507 GO:0009535	chloroplast; chloroplast thylakoid membrane; mitochondrion
Glyma.08G342000	AT1G73260	kunitz trypsin inhibitor 1		GO:0009651 GO:0009751 GO:0010167 GO:0012501 GO:0015706 GO:0042542 GO:0042742	defense response to bacterium; nitrate transport; programmed cell death; response to hydrogen peroxide; response to nitrate; response to salicylic acid stimulus; response to salt stress	GO:0004866	endopeptidase inhibitor activity	GO:0005576 GO:0005739	extracellular region; mitochondrion
Glyma.08G351800	AT5G59540	2-oxoglutarate (2OG) and Fe(II)-dependent oxygenase superfamily protein		GO:0010167 GO:0015706 GO:0055114	nitrate transport; oxidation-reduction process; response to nitrate	GO:0016491 GO:0016706	oxidoreductase activity; oxidoreductase activity, acting on paired donors, with incorporation or reduction of molecular oxygen, 2-oxoglutarate as one donor, and incorporation of one atom each of oxygen into both donors	GO:0005737	cytoplasm
Glyma.09G003300	AT2G44500	O-fucosyltransferase family protein		GO:0008150	biological process	GO:0016757	transferase activity, transferring glycosyl groups	GO:0005794	Golgi apparatus
Glyma.09G008200	AT4G03965	RING/U-box superfamily protein		GO:0008150	biological process	GO:0008270	zinc ion binding	GO:0005737	cytoplasm
Glyma.09G034300	AT2G47260	WRKY DNA-binding protein 23	WRKY	GO:0006355 GO:0009624 GO:0009733	regulation of transcription, DNA-dependent; response to auxin stimulus; response to nematode	GO:0003700 GO:0043565	sequence-specific DNA binding; sequence-specific DNA binding transcription factor activity	GO:0005634	nucleus
Glyma.09G040400	NA	NA		NA	NA	NA	NA	NA	NA
Glyma.09G040600	NA	NA		NA	NA	NA	NA	NA	NA
Glyma.09G041900	NA	NA		NA	NA	NA	NA	NA	NA
Glyma.09G042500	AT3G06840	NA		GO:0008150	biological process	GO:0003674	molecular function	GO:0009507	chloroplast
Glyma.09G053400	AT3G54070	Ankyrin repeat family protein		GO:0008150	biological process	NA	NA	GO:0005575	cellular component
Glyma.09G054100	AT3G54070	Ankyrin repeat family protein		GO:0008150	biological process	NA	NA	GO:0005575	cellular component
Glyma.09G054900	AT3G18670	Ankyrin repeat family protein		NA	NA	NA	NA	NA	NA
Glyma.09G055700	AT5G24080	Protein kinase superfamily protein		GO:0006468	protein phosphorylation	GO:0004672 GO:0004674 GO:0004713 GO:0005524 GO:0016301 GO:0016772	ATP binding; kinase activity; protein kinase activity; protein serine/threonine kinase activity; protein tyrosine kinase activity; transferase activity, transferring phosphorus-containing groups	GO:0005886	plasma membrane
Glyma.09G060200	AT5G57150	basic helix-loop-helix (bHLH) DNA-binding superfamily protein	bHLH	GO:0006355 GO:0009694 GO:0009753	jasmonic acid metabolic process; regulation of transcription, DNA-dependent; response to jasmonic acid stimulus	GO:0003677 GO:0003700	DNA binding; sequence-specific DNA binding transcription factor activity	GO:0005634	nucleus
Glyma.09G060700	AT4G29905	NA		NA	NA	NA	NA	GO:0005575	cellular component
Glyma.09G063300	AT4G26130	NA		GO:0008150 GO:0030003 GO:0070838	biological process; cellular cation homeostasis; divalent metal ion transport	GO:0003674	molecular function	NA	NA
Glyma.09G071600	AT1G19180	jasmonate-zim-domain protein 1		GO:0000165 GO:0006612 GO:0007154 GO:0007165 GO:0009409 GO:0009414 GO:0009555 GO:0009611 GO:0009620 GO:0009695 GO:0009723 GO:0009733 GO:0009738 GO:0009753 GO:0009862 GO:0009863 GO:0009867 GO:0009908 GO:0010200 GO:0010363 GO:0030968 GO:0031348 GO:0035556 GO:0042538 GO:0042742 GO:0043069 GO:0050832	MAPK cascade; abscisic acid mediated signaling pathway; cell communication; defense response to bacterium; defense response to fungus; endoplasmic reticulum unfolded protein response; flower development; hyperosmotic salinity response; intracellular signal transduction; jasmonic acid biosynthetic process; jasmonic acid mediated signaling pathway; negative regulation of defense response; negative …	GO:0005515	protein binding	GO:0005634	nucleus
Glyma.09G072000	AT1G19210	Integrase-type DNA-binding superfamily protein	ERF	GO:0006355 GO:0010200	regulation of transcription, DNA-dependent; response to chitin	GO:0003677 GO:0003700	DNA binding; sequence-specific DNA binding transcription factor activity	GO:0005634	nucleus
Glyma.09G095800	AT5G25240	NA		GO:0008150	biological process	GO:0003674	molecular function	GO:0005575	cellular component
Glyma.09G099200	AT4G27290	S-locus lectin protein kinase family protein		GO:0006468 GO:0048544 GO:0048765	protein phosphorylation; recognition of pollen; root hair cell differentiation	GO:0004672 GO:0004674 GO:0004713 GO:0005524 GO:0016772 GO:0030246	ATP binding; carbohydrate binding; protein kinase activity; protein serine/threonine kinase activity; protein tyrosine kinase activity; transferase activity, transferring phosphorus-containing groups	GO:0005886	plasma membrane
Glyma.09G107100	AT5G05600	2-oxoglutarate (2OG) and Fe(II)-dependent oxygenase superfamily protein		GO:0009611 GO:0009620 GO:0009695 GO:0009753 GO:0009867 GO:0055114 GO:0080167	jasmonic acid biosynthetic process; jasmonic acid mediated signaling pathway; oxidation-reduction process; response to fungus; response to jasmonic acid stimulus; response to karrikin; response to wounding	GO:0005506 GO:0016491 GO:0016706	iron ion binding; oxidoreductase activity; oxidoreductase activity, acting on paired donors, with incorporation or reduction of molecular oxygen, 2-oxoglutarate as one donor, and incorporation of one atom each of oxygen into both donors	GO:0005737	cytoplasm
Glyma.09G115800	AT1G15080	lipid phosphate phosphatase 2		GO:0009738	abscisic acid mediated signaling pathway	GO:0003824 GO:0003993 GO:0008195	acid phosphatase activity; catalytic activity; phosphatidate phosphatase activity	GO:0005737 GO:0005886 GO:0005887 GO:0016020	cytoplasm; integral to plasma membrane; membrane; plasma membrane
Glyma.09G118800	AT2G01340	Encodes a protein whose expression is responsive to nematode infection.		GO:0006499 GO:0009624	N-terminal protein myristoylation; response to nematode	GO:0003674	molecular function	GO:0005886	plasma membrane
Glyma.09G124700	AT1G70670	Caleosin-related family protein		GO:0009737 GO:0009819	drought recovery; response to abscisic acid stimulus	GO:0005509	calcium ion binding	GO:0009507	chloroplast
Glyma.09G142900	AT3G48270	cytochrome P450, family 71, subfamily A, polypeptide 26		GO:0055114	oxidation-reduction process	GO:0005506 GO:0009055 GO:0016705 GO:0019825 GO:0020037	electron carrier activity; heme binding; iron ion binding; oxidoreductase activity, acting on paired donors, with incorporation or reduction of molecular oxygen; oxygen binding	NA	NA
Glyma.09G151400	AT4G23180	cysteine-rich RLK (RECEPTOR-like protein kinase) 10		GO:0006468 GO:0006995	cellular response to nitrogen starvation; protein phosphorylation	GO:0004672 GO:0004674 GO:0004713 GO:0005524 GO:0016301 GO:0016772	ATP binding; kinase activity; protein kinase activity; protein serine/threonine kinase activity; protein tyrosine kinase activity; transferase activity, transferring phosphorus-containing groups	GO:0005886	plasma membrane
Glyma.09G160100	AT1G03610	Protein of unknown function (DUF789)		GO:0008150	biological process	GO:0003674	molecular function	GO:0005634	nucleus
Glyma.09G161100	AT5G25930	Protein kinase family protein with leucine-rich repeat domain		GO:0002679 GO:0006468 GO:0006612 GO:0006944 GO:0009723 GO:0009738 GO:0010200 GO:0010363 GO:0035556 GO:0043069 GO:0052542	abscisic acid mediated signaling pathway; cellular membrane fusion; defense response by callose deposition; intracellular signal transduction; negative regulation of programmed cell death; protein phosphorylation; protein targeting to membrane; regulation of plant-type hypersensitive response; respiratory burst involved in defense response; response to chitin; response to ethylene stimulus	GO:0004672 GO:0004674 GO:0005524 GO:0016301 GO:0016772	ATP binding; kinase activity; protein kinase activity; protein serine/threonine kinase activity; transferase activity, transferring phosphorus-containing groups	GO:0005886 GO:0016020	membrane; plasma membrane
Glyma.09G163900	AT1G17860	Kunitz family trypsin and protease inhibitor protein		GO:0006457 GO:0009408 GO:0009644 GO:0010167 GO:0015706 GO:0034976 GO:0042542	nitrate transport; protein folding; response to endoplasmic reticulum stress; response to heat; response to high light intensity; response to hydrogen peroxide; response to nitrate	GO:0004866	endopeptidase inhibitor activity	GO:0005576 GO:0005618 GO:0048046	apoplast; cell wall; extracellular region
Glyma.09G164100	AT5G23370	GRAM domain-containing protein / ABA-responsive protein-related		GO:0008150	biological process	GO:0003674	molecular function	GO:0009507	chloroplast
Glyma.09G168700	AT3G17700	cyclic nucleotide-binding transporter 1		GO:0000165 GO:0006612 GO:0006811 GO:0009595 GO:0009624 GO:0009697 GO:0009862 GO:0009867 GO:0010200 GO:0010310 GO:0010363 GO:0031348 GO:0042742 GO:0043900 GO:0050832 GO:0055085	MAPK cascade; defense response to bacterium; defense response to fungus; detection of biotic stimulus; ion transport; jasmonic acid mediated signaling pathway; negative regulation of defense response; protein targeting to membrane; regulation of hydrogen peroxide metabolic process; regulation of multi-organism process; regulation of plant-type hypersensitive response; response to chitin; response…	GO:0005216 GO:0005516 GO:0030551	calmodulin binding; cyclic nucleotide binding; ion channel activity	GO:0005886	plasma membrane
Glyma.09G180300	AT1G73760	RING/U-box superfamily protein		NA	NA	GO:0008270	zinc ion binding	GO:0005634	nucleus
Glyma.09G181100	AT3G18280	Bifunctional inhibitor/lipid-transfer protein/seed storage 2S albumin superfamily protein		GO:0006612 GO:0006869 GO:0009963 GO:0010363	lipid transport; positive regulation of flavonoid biosynthetic process; protein targeting to membrane; regulation of plant-type hypersensitive response	GO:0008289	lipid binding	GO:0005576	extracellular region
Glyma.09G181400	AT1G18390	Protein kinase superfamily protein		GO:0002679 GO:0006468 GO:0006984 GO:0009407 GO:0010200 GO:0010583 GO:0034976	ER-nucleus signaling pathway; protein phosphorylation; respiratory burst involved in defense response; response to chitin; response to cyclopentenone; response to endoplasmic reticulum stress; toxin catabolic process	GO:0004672 GO:0004674 GO:0004713 GO:0005524 GO:0016301 GO:0016772	ATP binding; kinase activity; protein kinase activity; protein serine/threonine kinase activity; protein tyrosine kinase activity; transferase activity, transferring phosphorus-containing groups	GO:0005576 GO:0005886	extracellular region; plasma membrane
Glyma.09G181600	AT1G18390	Protein kinase superfamily protein		GO:0002679 GO:0006468 GO:0006984 GO:0009407 GO:0010200 GO:0010583 GO:0034976	ER-nucleus signaling pathway; protein phosphorylation; respiratory burst involved in defense response; response to chitin; response to cyclopentenone; response to endoplasmic reticulum stress; toxin catabolic process	GO:0004672 GO:0004674 GO:0004713 GO:0005524 GO:0016301 GO:0016772	ATP binding; kinase activity; protein kinase activity; protein serine/threonine kinase activity; protein tyrosine kinase activity; transferase activity, transferring phosphorus-containing groups	GO:0005576 GO:0005886	extracellular region; plasma membrane
Glyma.09G189700	AT5G53250	arabinogalactan protein 22		GO:0006826 GO:0010054 GO:0010106 GO:0010167 GO:0015706 GO:0016132	brassinosteroid biosynthetic process; cellular response to iron ion starvation; iron ion transport; nitrate transport; response to nitrate; trichoblast differentiation	NA	NA	GO:0005886 GO:0031225	anchored to membrane; plasma membrane
Glyma.09G194800	AT5G11590	Integrase-type DNA-binding superfamily protein	ERF	GO:0006355 GO:0045893	positive regulation of transcription, DNA-dependent; regulation of transcription, DNA-dependent	GO:0003677 GO:0003700 GO:0043565	DNA binding; sequence-specific DNA binding; sequence-specific DNA binding transcription factor activity	GO:0005634	nucleus
Glyma.09G196000	AT1G76490	hydroxy methylglutaryl CoA reductase 1		GO:0006816 GO:0007030 GO:0007033 GO:0008299 GO:0009611 GO:0009651 GO:0009805 GO:0015936 GO:0016126 GO:0019287 GO:0055114 GO:0060964	Golgi organization; calcium ion transport; coenzyme A metabolic process; coumarin biosynthetic process; isopentenyl diphosphate biosynthetic process, mevalonate pathway; isoprenoid biosynthetic process; oxidation-reduction process; regulation of gene silencing by miRNA; response to salt stress; response to wounding; sterol biosynthetic process; vacuole organization	GO:0004420 GO:0005515 GO:0016616 GO:0042282 GO:0050661 GO:0050662	NADP binding; coenzyme binding; hydroxymethylglutaryl-CoA reductase (NADPH) activity; hydroxymethylglutaryl-CoA reductase activity; oxidoreductase activity, acting on the CH-OH group of donors, NAD or NADP as acceptor; protein binding	GO:0005783 GO:0005789 GO:0016020 GO:0016021	endoplasmic reticulum; endoplasmic reticulum membrane; integral to membrane; membrane
Glyma.09G196400	AT5G53390	O-acyltransferase (WSD1-like) family protein		GO:0048446	petal morphogenesis	GO:0004144	diacylglycerol O-acyltransferase activity	GO:0005634 GO:0005886	nucleus; plasma membrane
Glyma.09G207400	AT5G46910	Transcription factor jumonji (jmj) family protein / zinc finger (C5HC2 type) family protein		GO:0006355 GO:0010200	regulation of transcription, DNA-dependent; response to chitin	GO:0003700	sequence-specific DNA binding transcription factor activity	GO:0005634	nucleus
Glyma.09G218600	AT4G19230	cytochrome P450, family 707, subfamily A, polypeptide 1		GO:0009639 GO:0009687 GO:0048838 GO:0050832 GO:0055114	abscisic acid metabolic process; defense response to fungus; oxidation-reduction process; release of seed from dormancy; response to red or far red light	GO:0005506 GO:0009055 GO:0010295 GO:0016705 GO:0019825 GO:0020037	(+)-abscisic acid 8'-hydroxylase activity; electron carrier activity; heme binding; iron ion binding; oxidoreductase activity, acting on paired donors, with incorporation or reduction of molecular oxygen; oxygen binding	GO:0005576	extracellular region
Glyma.09G225400	AT3G63440	cytokinin oxidase/dehydrogenase 6		GO:0009690 GO:0009823 GO:0010103 GO:0055114	cytokinin catabolic process; cytokinin metabolic process; oxidation-reduction process; stomatal complex morphogenesis	GO:0003824 GO:0008762 GO:0016491 GO:0016614 GO:0019139 GO:0050660	UDP-N-acetylmuramate dehydrogenase activity; catalytic activity; cytokinin dehydrogenase activity; flavin adenine dinucleotide binding; oxidoreductase activity; oxidoreductase activity, acting on CH-OH group of donors	GO:0005576	extracellular region
Glyma.09G229300	NA	NA		NA	NA	NA	NA	NA	NA
Glyma.09G235200	AT3G29060	EXS (ERD1/XPR1/SYG1) family protein		GO:0006817 GO:0016036	cellular response to phosphate starvation; phosphate ion transport	NA	NA	GO:0005886 GO:0016021	integral to membrane; plasma membrane
Glyma.09G236500	AT1G48320	Thioesterase superfamily protein		GO:0042372	phylloquinone biosynthetic process	GO:0016788 GO:0047617	acyl-CoA hydrolase activity; hydrolase activity, acting on ester bonds	GO:0005777 GO:0009507	chloroplast; peroxisome
Glyma.09G238100	AT3G28960	Transmembrane amino acid transporter family protein		GO:0006865	amino acid transport	GO:0015171	amino acid transmembrane transporter activity	GO:0005774 GO:0016020	membrane; vacuolar membrane
Glyma.09G241800	AT3G60390	homeobox-leucine zipper protein 3	HD-ZIP	GO:0006351 GO:0006355	regulation of transcription, DNA-dependent; transcription, DNA-dependent	GO:0003677 GO:0003700 GO:0043565	DNA binding; sequence-specific DNA binding; sequence-specific DNA binding transcription factor activity	GO:0005634	nucleus
Glyma.09G242900	AT2G44830	Protein kinase superfamily protein		GO:0006468 GO:0009855 GO:0009887 GO:0010014 GO:0010051 GO:0010073 GO:0010089 GO:0044036 GO:0048439 GO:0048519	cell wall macromolecule metabolic process; determination of bilateral symmetry; flower morphogenesis; meristem initiation; meristem maintenance; negative regulation of biological process; organ morphogenesis; protein phosphorylation; xylem and phloem pattern formation; xylem development	GO:0004672 GO:0004674 GO:0004713 GO:0005524 GO:0016301 GO:0016772	ATP binding; kinase activity; protein kinase activity; protein serine/threonine kinase activity; protein tyrosine kinase activity; transferase activity, transferring phosphorus-containing groups	GO:0005634 GO:0005886	nucleus; plasma membrane
Glyma.09G251500	AT4G18530	Protein of unknown function (DUF707)		GO:0008150	biological process	GO:0016757	transferase activity, transferring glycosyl groups	NA	NA
Glyma.09G253200	AT1G16130	wall associated kinase-like 2		GO:0006468 GO:0010200 GO:0046777 GO:0050832	defense response to fungus; protein autophosphorylation; protein phosphorylation; response to chitin	GO:0004672 GO:0004674 GO:0005509 GO:0005524 GO:0016301 GO:0016772	ATP binding; calcium ion binding; kinase activity; protein kinase activity; protein serine/threonine kinase activity; transferase activity, transferring phosphorus-containing groups	GO:0016021	integral to membrane
Glyma.09G273400	AT5G08380	alpha-galactosidase 1		GO:0005975 GO:0005990 GO:0009311 GO:0016139 GO:0046477	carbohydrate metabolic process; glycoside catabolic process; glycosylceramide catabolic process; lactose catabolic process; oligosaccharide metabolic process	GO:0003824 GO:0004553 GO:0004557	alpha-galactosidase activity; catalytic activity; hydrolase activity, hydrolyzing O-glycosyl compounds	GO:0005576 GO:0005618 GO:0005737 GO:0009505 GO:0048046	apoplast; cell wall; cytoplasm; extracellular region; plant-type cell wall
Glyma.09G275100	AT3G08760	Protein kinase superfamily protein		GO:0006468 GO:0006914	autophagy; protein phosphorylation	GO:0004672 GO:0005524 GO:0016301 GO:0016772	ATP binding; kinase activity; protein kinase activity; transferase activity, transferring phosphorus-containing groups	GO:0005886	plasma membrane
Glyma.09G277500	AT4G25845	BEST Arabidopsis thaliana protein match is: OSBP(oxysterol binding protein)-related protein 4B (TAIR:AT4G25850.		GO:0008150	biological process	GO:0003674	molecular function	GO:0005634	nucleus
Glyma.09G283400	AT5G23240	DNAJ heat shock N-terminal domain-containing protein		GO:0006457	protein folding	GO:0031072 GO:0051082	heat shock protein binding; unfolded protein binding	GO:0009507	chloroplast
Glyma.10G002200	AT3G22930	calmodulin-like 11		GO:0008150 GO:0030048 GO:0051645 GO:0051646 GO:0060151	Golgi localization; actin filament-based movement; biological process; mitochondrion localization; peroxisome localization	GO:0005509	calcium ion binding	NA	NA
Glyma.10G007100	AT3G23230	Integrase-type DNA-binding superfamily protein	ERF	GO:0006355 GO:0009873 GO:0010200	ethylene mediated signaling pathway; regulation of transcription, DNA-dependent; response to chitin	GO:0003677 GO:0003700	DNA binding; sequence-specific DNA binding transcription factor activity	GO:0005634	nucleus
Glyma.10G010100	NA	NA		NA	NA	NA	NA	NA	NA
Glyma.10G018800	AT1G02860	SPX (SYG1/Pho81/XPR1) domain-containing protein		GO:0006817 GO:0009626 GO:0009627 GO:0009697 GO:0009751 GO:0010167 GO:0010337 GO:0016036 GO:0042742 GO:0080021	cellular response to phosphate starvation; defense response to bacterium; phosphate ion transport; plant-type hypersensitive response; regulation of salicylic acid metabolic process; response to benzoic acid stimulus; response to nitrate; response to salicylic acid stimulus; salicylic acid biosynthetic process; systemic acquired resistance	GO:0004842 GO:0008270	ubiquitin-protein ligase activity; zinc ion binding	GO:0005634	nucleus
Glyma.10G025500	AT1G03210	Phenazine biosynthesis PhzC/PhzF protein		GO:0009058	biosynthetic process	GO:0003824	catalytic activity	GO:0005634	nucleus
Glyma.10G041400	AT4G28706	pfkB-like carbohydrate kinase family protein		GO:0006014	D-ribose metabolic process	GO:0004747 GO:0016301 GO:0016773	kinase activity; phosphotransferase activity, alcohol group as acceptor; ribokinase activity	GO:0009507	chloroplast
Glyma.10G072000	AT3G52740	NA		GO:0009744 GO:0009813 GO:0010224 GO:0080167	flavonoid biosynthetic process; response to UV-B; response to karrikin; response to sucrose stimulus	GO:0003674	molecular function	GO:0005634	nucleus
Glyma.10G090700	AT5G13700	polyamine oxidase 1		GO:0006598 GO:0055114	oxidation-reduction process; polyamine catabolic process	GO:0046592 GO:0050660	flavin adenine dinucleotide binding; polyamine oxidase activity	GO:0005739	mitochondrion
Glyma.10G106600	AT5G20950	Glycosyl hydrolase family protein		GO:0005975 GO:0009627 GO:0034976	carbohydrate metabolic process; response to endoplasmic reticulum stress; systemic acquired resistance	GO:0004553	hydrolase activity, hydrolyzing O-glycosyl compounds	GO:0005576 GO:0005618 GO:0009505 GO:0009506 GO:0016020	cell wall; extracellular region; membrane; plant-type cell wall; plasmodesma
Glyma.10G111200	AT3G54260	TRICHOME BIREFRINGENCE-LIKE 36		GO:0008150 GO:0010089 GO:0044036	biological process; cell wall macromolecule metabolic process; xylem development	NA	NA	NA	NA
Glyma.10G144200	AT1G56720	Protein kinase superfamily protein		GO:0006468 GO:0046777	protein autophosphorylation; protein phosphorylation	GO:0004672 GO:0004674 GO:0005524 GO:0016301 GO:0016772	ATP binding; kinase activity; protein kinase activity; protein serine/threonine kinase activity; transferase activity, transferring phosphorus-containing groups	GO:0005886	plasma membrane
Glyma.10G145300	AT2G47180	galactinol synthase 1		GO:0006012 GO:0006979 GO:0009408 GO:0009409 GO:0009414 GO:0009644 GO:0009651 GO:0009737 GO:0016051 GO:0042542	carbohydrate biosynthetic process; galactose metabolic process; response to abscisic acid stimulus; response to cold; response to heat; response to high light intensity; response to hydrogen peroxide; response to oxidative stress; response to salt stress; response to water deprivation	GO:0016758 GO:0047216	inositol 3-alpha-galactosyltransferase activity; transferase activity, transferring hexosyl groups	GO:0005575	cellular component
Glyma.10G148700	AT5G26920	Cam-binding protein 60-like G		GO:0000165 GO:0002237 GO:0006612 GO:0006944 GO:0009409 GO:0009595 GO:0009617 GO:0009627 GO:0009697 GO:0009814 GO:0009816 GO:0009862 GO:0009863 GO:0009867 GO:0010112 GO:0010200 GO:0010310 GO:0010363 GO:0019684 GO:0031348 GO:0042742 GO:0043069 GO:0043900 GO:0045087 GO:0045088 GO:0050832 GO:0071456 GO:0080142	MAPK cascade; cellular membrane fusion; cellular response to hypoxia; defense response, incompatible interaction; defense response to bacterium; defense response to bacterium, incompatible interaction; defense response to fungus; detection of biotic stimulus; innate immune response; jasmonic acid mediated signaling pathway; negative regulation of defense response; negative regulation of programme…	GO:0003700 GO:0005516 GO:0043565	calmodulin binding; sequence-specific DNA binding; sequence-specific DNA binding transcription factor activity	GO:0005634	nucleus
Glyma.10G150400	AT1G09155	phloem protein 2-B15		NA	NA	GO:0030246	carbohydrate binding	GO:0005634	nucleus
Glyma.10G154400	AT1G09010	glycoside hydrolase family 2 protein		GO:0005975	carbohydrate metabolic process	GO:0003824 GO:0004553 GO:0043169	catalytic activity; cation binding; hydrolase activity, hydrolyzing O-glycosyl compounds	GO:0005576 GO:0005773	extracellular region; vacuole
Glyma.10G169300	AT2G02360	phloem protein 2-B10		NA	NA	GO:0030246	carbohydrate binding	GO:0005634	nucleus
Glyma.10G172600	AT4G24140	alpha/beta-Hydrolases superfamily protein		NA	NA	GO:0016787	hydrolase activity	GO:0005737	cytoplasm
Glyma.10G172700	AT1G64660	methionine gamma-lyase		GO:0006520 GO:0006730 GO:0009970 GO:0019458 GO:0042631 GO:0051289	cellular amino acid metabolic process; cellular response to sulfate starvation; cellular response to water deprivation; methionine catabolic process via 2-oxobutanoate; one-carbon metabolic process; protein homotetramerization	GO:0003824 GO:0018826	catalytic activity; methionine gamma-lyase activity	GO:0005737 GO:0005829	cytoplasm; cytosol
Glyma.10G178400	AT3G22930	calmodulin-like 11		GO:0008150 GO:0030048 GO:0051645 GO:0051646 GO:0060151	Golgi localization; actin filament-based movement; biological process; mitochondrion localization; peroxisome localization	GO:0005509	calcium ion binding	NA	NA
Glyma.10G180800	AT3G23250	myb domain protein 15	MYB	GO:0002679 GO:0006355 GO:0007165 GO:0009414 GO:0009611 GO:0009651 GO:0009695 GO:0009723 GO:0009733 GO:0009737 GO:0009738 GO:0009753 GO:0009867 GO:0009873 GO:0010200 GO:0035556 GO:0042538 GO:0046686 GO:0052542	abscisic acid mediated signaling pathway; defense response by callose deposition; ethylene mediated signaling pathway; hyperosmotic salinity response; intracellular signal transduction; jasmonic acid biosynthetic process; jasmonic acid mediated signaling pathway; regulation of transcription, DNA-dependent; respiratory burst involved in defense response; response to abscisic acid stimulus; respons…	GO:0003677 GO:0003700	DNA binding; sequence-specific DNA binding transcription factor activity	GO:0005634	nucleus
Glyma.10G200700	AT5G04500	glycosyltransferase family protein 47		NA	NA	GO:0016757 GO:0016758	transferase activity, transferring glycosyl groups; transferase activity, transferring hexosyl groups	GO:0031227	intrinsic to endoplasmic reticulum membrane
Glyma.10G213500	AT1G07900	LOB domain-containing protein 1	LBD	GO:0008150	biological process	NA	NA	GO:0005634 GO:0005739	mitochondrion; nucleus
Glyma.10G230000	AT4G11260	phosphatase-related		GO:0000165 GO:0006511 GO:0006612 GO:0009408 GO:0009595 GO:0009697 GO:0009734 GO:0009793 GO:0009853 GO:0009862 GO:0009863 GO:0009867 GO:0010187 GO:0010200 GO:0010310 GO:0010363 GO:0030163 GO:0031348 GO:0042742 GO:0043069 GO:0043900 GO:0050832 GO:0051707 GO:0051788 GO:0080129 GO:2000072	MAPK cascade; auxin mediated signaling pathway; defense response to bacterium; defense response to fungus; detection of biotic stimulus; embryo development ending in seed dormancy; jasmonic acid mediated signaling pathway; negative regulation of defense response; negative regulation of programmed cell death; negative regulation of seed germination; photorespiration; proteasome core complex assemb…	GO:0005515	protein binding	GO:0005634 GO:0005737 GO:0005829 GO:0019005	SCF ubiquitin ligase complex; cytoplasm; cytosol; nucleus
Glyma.10G236500	AT5G52270	SNARE-like superfamily protein		GO:0006810 GO:0016192	transport; vesicle-mediated transport	GO:0003674	molecular function	GO:0005634 GO:0016021	integral to membrane; nucleus
Glyma.10G239400	AT5G51990	C-repeat-binding factor 4	ERF	GO:0006355	regulation of transcription, DNA-dependent	GO:0003677 GO:0003700	DNA binding; sequence-specific DNA binding transcription factor activity	GO:0005634	nucleus
Glyma.10G244600	AT3G22810	Plant protein of unknown function (DUF828) with plant pleckstrin homology-like region		GO:0007165	signal transduction	GO:0005543 GO:0035091	phosphatidylinositol binding; phospholipid binding	GO:0005634	nucleus
Glyma.10G253100	AT4G38830	cysteine-rich RLK (RECEPTOR-like protein kinase) 26		GO:0006468 GO:0006826 GO:0010106 GO:0010167 GO:0015706	cellular response to iron ion starvation; iron ion transport; nitrate transport; protein phosphorylation; response to nitrate	GO:0004672 GO:0004674 GO:0004713 GO:0005524 GO:0016301 GO:0016772	ATP binding; kinase activity; protein kinase activity; protein serine/threonine kinase activity; protein tyrosine kinase activity; transferase activity, transferring phosphorus-containing groups	GO:0005576	extracellular region
Glyma.10G253300	AT4G21410	cysteine-rich RLK (RECEPTOR-like protein kinase) 29		GO:0006468 GO:0009737	protein phosphorylation; response to abscisic acid stimulus	GO:0004672 GO:0004674 GO:0005524 GO:0016301 GO:0016772	ATP binding; kinase activity; protein kinase activity; protein serine/threonine kinase activity; transferase activity, transferring phosphorus-containing groups	GO:0005576 GO:0005773 GO:0005886	extracellular region; plasma membrane; vacuole
Glyma.10G261600	AT4G34220	Leucine-rich repeat protein kinase family protein		GO:0006468 GO:0007169	protein phosphorylation; transmembrane receptor protein tyrosine kinase signaling pathway	GO:0004672 GO:0004674 GO:0004713 GO:0005524 GO:0016772	ATP binding; protein kinase activity; protein serine/threonine kinase activity; protein tyrosine kinase activity; transferase activity, transferring phosphorus-containing groups	NA	NA
Glyma.10G272000	AT1G68390	Core-2/I-branching beta-1,6-N-acetylglucosaminyltransferase family protein		NA	NA	GO:0016757	transferase activity, transferring glycosyl groups	GO:0016020	membrane
Glyma.10G273200	AT1G25400	NA		GO:0006612 GO:0008150 GO:0009625 GO:0009862 GO:0009863 GO:0009867 GO:0010200 GO:0010363 GO:0031348	biological process; jasmonic acid mediated signaling pathway; negative regulation of defense response; protein targeting to membrane; regulation of plant-type hypersensitive response; response to chitin; response to insect; salicylic acid mediated signaling pathway; systemic acquired resistance, salicylic acid mediated signaling pathway	GO:0003674	molecular function	GO:0005634	nucleus
Glyma.10G284700	AT3G30340	nodulin MtN21 /EamA-like transporter family protein		NA	NA	NA	NA	GO:0016020	membrane
Glyma.10G295200	AT5G22990	C2H2-like zinc finger protein	C2H2	GO:0006355	regulation of transcription, DNA-dependent	GO:0003676 GO:0003700 GO:0008270	nucleic acid binding; sequence-specific DNA binding transcription factor activity; zinc ion binding	GO:0005622 GO:0005634	intracellular; nucleus
Glyma.10G295300	AT2G18950	homogentisate phytyltransferase 1		GO:0000096 GO:0006546 GO:0006636 GO:0006733 GO:0006766 GO:0008652 GO:0009072 GO:0009106 GO:0009108 GO:0009117 GO:0009266 GO:0009416 GO:0009695 GO:0009915 GO:0009965 GO:0010189 GO:0015994 GO:0019216 GO:0019288 GO:0019748 GO:0030154 GO:0031347 GO:0031408 GO:0042362 GO:0044272 GO:0045893 GO:0071555	aromatic amino acid family metabolic process; cell differentiation; cell wall organization; cellular amino acid biosynthetic process; chlorophyll metabolic process; coenzyme biosynthetic process; fat-soluble vitamin biosynthetic process; glycine catabolic process; isopentenyl diphosphate biosynthetic process, mevalonate-independent pathway; jasmonic acid biosynthetic process; leaf morphogenesis; …	GO:0004659 GO:0010176	homogentisate phytyltransferase activity; prenyltransferase activity	GO:0005886 GO:0009507 GO:0016021	chloroplast; integral to membrane; plasma membrane
Glyma.11G003500	AT5G28237	Pyridoxal-5'-phosphate-dependent enzyme family protein		GO:0000162 GO:0006568 GO:0008152	metabolic process; tryptophan biosynthetic process; tryptophan metabolic process	GO:0003824 GO:0004834 GO:0030170	catalytic activity; pyridoxal phosphate binding; tryptophan synthase activity	GO:0005739	mitochondrion
Glyma.11G014200	AT1G71450	Integrase-type DNA-binding superfamily protein	ERF	GO:0006355	regulation of transcription, DNA-dependent	GO:0003677 GO:0003700	DNA binding; sequence-specific DNA binding transcription factor activity	GO:0005634	nucleus
Glyma.11G021500	AT4G11280	1-aminocyclopropane-1-carboxylic acid (acc) synthase 6		GO:0006979 GO:0009058 GO:0009611 GO:0009612 GO:0009693 GO:0009723 GO:0009733 GO:0009737 GO:0009753 GO:0010200 GO:0042218 GO:0071281	1-aminocyclopropane-1-carboxylate biosynthetic process; biosynthetic process; cellular response to iron ion; ethylene biosynthetic process; response to abscisic acid stimulus; response to auxin stimulus; response to chitin; response to ethylene stimulus; response to jasmonic acid stimulus; response to mechanical stimulus; response to oxidative stress; response to wounding	GO:0003824 GO:0005515 GO:0016740 GO:0016847 GO:0030170 GO:0042802	1-aminocyclopropane-1-carboxylate synthase activity; catalytic activity; identical protein binding; protein binding; pyridoxal phosphate binding; transferase activity	GO:0005737	cytoplasm
Glyma.11G022800	AT5G52430	hydroxyproline-rich glycoprotein family protein		GO:0008150	biological process	GO:0003674	molecular function	GO:0005634	nucleus
Glyma.11G030900	AT3G60670	PLATZ transcription factor family protein		GO:0008150	biological process	GO:0008270	zinc ion binding	GO:0005634	nucleus
Glyma.11G038500	AT5G41150	Restriction endonuclease, type II-like superfamily protein		GO:0000710 GO:0000712 GO:0000724 GO:0006259 GO:0006281 GO:0006289 GO:0006296 GO:0006979 GO:0009314	DNA metabolic process; DNA repair; double-strand break repair via homologous recombination; meiotic mismatch repair; nucleotide-excision repair; nucleotide-excision repair, DNA incision, 5'-to lesion; resolution of meiotic recombination intermediates; response to oxidative stress; response to radiation	GO:0000014 GO:0003677 GO:0003697 GO:0004518	DNA binding; nuclease activity; single-stranded DNA binding; single-stranded DNA specific endodeoxyribonuclease activity	GO:0000110 GO:0005634	nucleotide-excision repair factor 1 complex; nucleus
Glyma.11G038600	AT1G19180	jasmonate-zim-domain protein 1		GO:0000165 GO:0006612 GO:0007154 GO:0007165 GO:0009409 GO:0009414 GO:0009555 GO:0009611 GO:0009620 GO:0009695 GO:0009723 GO:0009733 GO:0009738 GO:0009753 GO:0009862 GO:0009863 GO:0009867 GO:0009908 GO:0010200 GO:0010363 GO:0030968 GO:0031348 GO:0035556 GO:0042538 GO:0042742 GO:0043069 GO:0050832	MAPK cascade; abscisic acid mediated signaling pathway; cell communication; defense response to bacterium; defense response to fungus; endoplasmic reticulum unfolded protein response; flower development; hyperosmotic salinity response; intracellular signal transduction; jasmonic acid biosynthetic process; jasmonic acid mediated signaling pathway; negative regulation of defense response; negative …	GO:0005515	protein binding	GO:0005634	nucleus
Glyma.11G043000	AT2G35290	NA		GO:0008150 GO:0009741	biological process; response to brassinosteroid stimulus	GO:0003674	molecular function	NA	NA
Glyma.11G043700	AT4G37850	basic helix-loop-helix (bHLH) DNA-binding superfamily protein	bHLH	GO:0006355	regulation of transcription, DNA-dependent	GO:0003677 GO:0003700	DNA binding; sequence-specific DNA binding transcription factor activity	GO:0005634	nucleus
Glyma.11G046200	AT5G65890	ACT domain repeat 1		GO:0008152	metabolic process	GO:0016597	amino acid binding	GO:0005634	nucleus
Glyma.11G046400	AT2G22880	VQ motif-containing protein		GO:0010224	response to UV-B	GO:0003674	molecular function	GO:0005634	nucleus
Glyma.11G048300	AT4G37640	calcium ATPase 2		GO:0006612 GO:0006754 GO:0006810 GO:0006812 GO:0006820 GO:0006862 GO:0006888 GO:0006944 GO:0008152 GO:0009627 GO:0009697 GO:0010200 GO:0010363 GO:0015696 GO:0015802 GO:0030968 GO:0043069 GO:0043090 GO:0043269 GO:0050832 GO:0070588	ATP biosynthetic process; ER to Golgi vesicle-mediated transport; amino acid import; ammonium transport; anion transport; basic amino acid transport; calcium ion transmembrane transport; cation transport; cellular membrane fusion; defense response to fungus; endoplasmic reticulum unfolded protein response; metabolic process; negative regulation of programmed cell death; nucleotide transport; prot…	GO:0000166 GO:0003824 GO:0005388 GO:0005516 GO:0005524 GO:0015085 GO:0015662 GO:0016820 GO:0046872	ATP binding; ATPase activity, coupled to transmembrane movement of ions, phosphorylative mechanism; calcium-transporting ATPase activity; calcium ion transmembrane transporter activity; calmodulin binding; catalytic activity; hydrolase activity, acting on acid anhydrides, catalyzing transmembrane movement of substances; metal ion binding; nucleotide binding	GO:0005783 GO:0005789 GO:0005886 GO:0016020	endoplasmic reticulum; endoplasmic reticulum membrane; membrane; plasma membrane
Glyma.11G051300	AT4G37450	arabinogalactan protein _x005f_x0001_18		NA	NA	NA	NA	GO:0005886 GO:0031225	anchored to membrane; plasma membrane
Glyma.11G051800	AT4G37340	cytochrome P450, family 81, subfamily D, polypeptide 3		GO:0055114	oxidation-reduction process	GO:0005506 GO:0009055 GO:0016705 GO:0019825 GO:0020037	electron carrier activity; heme binding; iron ion binding; oxidoreductase activity, acting on paired donors, with incorporation or reduction of molecular oxygen; oxygen binding	NA	NA
Glyma.11G053400	AT2G15480	UDP-glucosyl transferase 73B5		GO:0008152 GO:0009407 GO:0009723 GO:0010583 GO:0051707	metabolic process; response to cyclopentenone; response to ethylene stimulus; response to other organism; toxin catabolic process	GO:0008194 GO:0016757 GO:0016758 GO:0035251 GO:0080043	UDP-glucosyltransferase activity; UDP-glycosyltransferase activity; quercetin 3-O-glucosyltransferase activity; transferase activity, transferring glycosyl groups; transferase activity, transferring hexosyl groups	NA	NA
Glyma.11G059200	AT5G66920	SKU5 similar 17		GO:0055114 GO:0080167	oxidation-reduction process; response to karrikin	GO:0005507 GO:0016491	copper ion binding; oxidoreductase activity	GO:0005576 GO:0005618 GO:0009505	cell wall; extracellular region; plant-type cell wall
Glyma.11G077700	AT4G36010	Pathogenesis-related thaumatin superfamily protein		GO:0051707	response to other organism	GO:0003674	molecular function	GO:0005576 GO:0031225	anchored to membrane; extracellular region
Glyma.11G085400	AT4G35600	Protein kinase superfamily protein		GO:0006468 GO:0006499 GO:0006612 GO:0009612 GO:0009627 GO:0009697 GO:0009838 GO:0009863 GO:0009867 GO:0010363 GO:0019722	N-terminal protein myristoylation; abscission; calcium-mediated signaling; jasmonic acid mediated signaling pathway; protein phosphorylation; protein targeting to membrane; regulation of plant-type hypersensitive response; response to mechanical stimulus; salicylic acid biosynthetic process; salicylic acid mediated signaling pathway; systemic acquired resistance	GO:0004672 GO:0004674 GO:0004713 GO:0005515 GO:0005524 GO:0016301 GO:0016772	ATP binding; kinase activity; protein binding; protein kinase activity; protein serine/threonine kinase activity; protein tyrosine kinase activity; transferase activity, transferring phosphorus-containing groups	GO:0005886 GO:0009507	chloroplast; plasma membrane
Glyma.11G089200	AT1G14130	2-oxoglutarate (2OG) and Fe(II)-dependent oxygenase superfamily protein		GO:0055114	oxidation-reduction process	GO:0016491 GO:0016706	oxidoreductase activity; oxidoreductase activity, acting on paired donors, with incorporation or reduction of molecular oxygen, 2-oxoglutarate as one donor, and incorporation of one atom each of oxygen into both donors	GO:0005634 GO:0005737	cytoplasm; nucleus
Glyma.11G093100	AT4G37320	cytochrome P450, family 81, subfamily D, polypeptide 5		GO:0055114	oxidation-reduction process	GO:0005506 GO:0009055 GO:0016705 GO:0019825 GO:0020037	electron carrier activity; heme binding; iron ion binding; oxidoreductase activity, acting on paired donors, with incorporation or reduction of molecular oxygen; oxygen binding	NA	NA
Glyma.11G096600	AT2G17040	NAC domain containing protein 36	NAC	GO:0000165 GO:0006355 GO:0007275 GO:0009814 GO:0009965 GO:0010200 GO:0045792 GO:0048281	MAPK cascade; defense response, incompatible interaction; inflorescence morphogenesis; leaf morphogenesis; multicellular organismal development; negative regulation of cell size; regulation of transcription, DNA-dependent; response to chitin	GO:0003677 GO:0003700	DNA binding; sequence-specific DNA binding transcription factor activity	GO:0005634	nucleus
Glyma.11G096700	AT3G45970	expansin-like A1		GO:0009826 GO:0009828	plant-type cell wall loosening; unidimensional cell growth	NA	NA	GO:0005576 GO:0005618 GO:0005794 GO:0009505 GO:0009506	Golgi apparatus; cell wall; extracellular region; plant-type cell wall; plasmodesma
Glyma.11G097300	AT1G76160	SKU5 similar 5		GO:0016126 GO:0052541 GO:0052546 GO:0055114	cell wall pectin metabolic process; oxidation-reduction process; plant-type cell wall cellulose metabolic process; sterol biosynthetic process	GO:0005507 GO:0016491	copper ion binding; oxidoreductase activity	GO:0005576 GO:0005618 GO:0009505 GO:0009506 GO:0048046	apoplast; cell wall; extracellular region; plant-type cell wall; plasmodesma
Glyma.11G097500	AT4G38810	Calcium-binding EF-hand family protein		NA	NA	GO:0005509	calcium ion binding	GO:0005634	nucleus
Glyma.11G111700	AT4G36240	GATA transcription factor 7	GATA	GO:0006355 GO:0007623 GO:0009416 GO:0045893	circadian rhythm; positive regulation of transcription, DNA-dependent; regulation of transcription, DNA-dependent; response to light stimulus	GO:0003677 GO:0003700 GO:0008270 GO:0043565	DNA binding; sequence-specific DNA binding; sequence-specific DNA binding transcription factor activity; zinc ion binding	GO:0005634	nucleus
Glyma.11G119000	NA	NA		NA	NA	NA	NA	NA	NA
Glyma.11G120200	AT4G36750	Quinone reductase family protein		GO:0045892	negative regulation of transcription, DNA-dependent	GO:0010181 GO:0016491	FMN binding; oxidoreductase activity	GO:0005737 GO:0005886	cytoplasm; plasma membrane
Glyma.11G123300	AT2G15960	NA		GO:0008150	biological process	GO:0003674	molecular function	GO:0005575	cellular component
Glyma.11G124700	AT4G28460	NA		GO:0008150	biological process	GO:0003674	molecular function	GO:0005576	extracellular region
Glyma.11G129900	AT2G44480	beta glucosidase 17		GO:0005975	carbohydrate metabolic process	GO:0003824 GO:0004553 GO:0043169	catalytic activity; cation binding; hydrolase activity, hydrolyzing O-glycosyl compounds	GO:0005576	extracellular region
Glyma.11G150300	AT1G22900	Disease resistance-responsive (dirigent-like protein) family protein		GO:0006952	defense response	GO:0003674	molecular function	GO:0005576	extracellular region
Glyma.11G150400	AT1G65870	Disease resistance-responsive (dirigent-like protein) family protein		GO:0006952 GO:0009807	defense response; lignan biosynthetic process	GO:0003674	molecular function	GO:0005576 GO:0005618	cell wall; extracellular region
Glyma.11G151800	AT4G24010	cellulose synthase like G1		GO:0000271 GO:0006863 GO:0030244	cellulose biosynthetic process; polysaccharide biosynthetic process; purine nucleobase transport	GO:0016740 GO:0016757 GO:0016759 GO:0016760	cellulose synthase (UDP-forming) activity; cellulose synthase activity; transferase activity; transferase activity, transferring glycosyl groups	GO:0005886 GO:0016020	membrane; plasma membrane
Glyma.11G152400	AT3G27890	NADPH:quinone oxidoreductase		GO:0000165 GO:0006096 GO:0006612 GO:0006833 GO:0006970 GO:0006972 GO:0007030 GO:0009266 GO:0009595 GO:0009651 GO:0009697 GO:0009862 GO:0009867 GO:0010167 GO:0010200 GO:0010310 GO:0010363 GO:0015706 GO:0016045 GO:0031347 GO:0031348 GO:0042742 GO:0043900 GO:0046686 GO:0050776 GO:0050832	Golgi organization; MAPK cascade; defense response to bacterium; defense response to fungus; detection of bacterium; detection of biotic stimulus; glycolysis; hyperosmotic response; jasmonic acid mediated signaling pathway; negative regulation of defense response; nitrate transport; protein targeting to membrane; regulation of defense response; regulation of hydrogen peroxide metabolic process; r…	GO:0008752	FMN reductase activity	GO:0005829 GO:0005886 GO:0009507 GO:0009570	chloroplast; chloroplast stroma; cytosol; plasma membrane
Glyma.11G153000	AT5G17680	disease resistance protein (TIR-NBS-LRR class), putative		GO:0006952 GO:0007165	defense response; signal transduction	GO:0043531	ADP binding	GO:0005622	intracellular
Glyma.11G169800	AT1G07120	NA		GO:0008150	biological process	GO:0003674	molecular function	GO:0009507 GO:0009941	chloroplast; chloroplast envelope
Glyma.11G176500	AT5G58900	Homeodomain-like transcriptional regulator	MYB	NA	NA	GO:0003677 GO:0003700	DNA binding; sequence-specific DNA binding transcription factor activity	GO:0005634	nucleus
Glyma.11G180800	AT1G52340	NAD(P)-binding Rossmann-fold superfamily protein		GO:0006561 GO:0008152 GO:0009408 GO:0009414 GO:0009688 GO:0009750 GO:0010115 GO:0010182	abscisic acid biosynthetic process; metabolic process; proline biosynthetic process; regulation of abscisic acid biosynthetic process; response to fructose stimulus; response to heat; response to water deprivation; sugar mediated signaling pathway	GO:0000166 GO:0004022 GO:0010301 GO:0016491	alcohol dehydrogenase (NAD) activity; nucleotide binding; oxidoreductase activity; xanthoxin dehydrogenase activity	GO:0005829	cytosol
Glyma.11G181200	AT2G27310	F-box family protein		GO:0002679 GO:0008150 GO:0009414 GO:0009693 GO:0009723 GO:0009737 GO:0009738 GO:0009873 GO:0010200 GO:0010286 GO:0035556 GO:0042538	abscisic acid mediated signaling pathway; biological process; ethylene biosynthetic process; ethylene mediated signaling pathway; heat acclimation; hyperosmotic salinity response; intracellular signal transduction; respiratory burst involved in defense response; response to abscisic acid stimulus; response to chitin; response to ethylene stimulus; response to water deprivation	GO:0003674	molecular function	NA	NA
Glyma.11G182000	AT5G22380	NAC domain containing protein 90	NAC	GO:0006355 GO:0007275	multicellular organismal development; regulation of transcription, DNA-dependent	GO:0003677 GO:0003700	DNA binding; sequence-specific DNA binding transcription factor activity	GO:0005634	nucleus
Glyma.11G190200	AT1G08200	UDP-D-apiose/UDP-D-xylose synthase 2		GO:0009226 GO:0044237	cellular metabolic process; nucleotide-sugar biosynthetic process	GO:0000166 GO:0003824 GO:0048040 GO:0050662	UDP-glucuronate decarboxylase activity; catalytic activity; coenzyme binding; nucleotide binding	GO:0005634 GO:0005737 GO:0005829 GO:0048046	apoplast; cytoplasm; cytosol; nucleus
Glyma.11G190900	AT2G27880	Argonaute family protein		GO:0008150 GO:0048441 GO:0048443 GO:0048481	biological process; ovule development; petal development; stamen development	GO:0003676	nucleic acid binding	GO:0005737	cytoplasm
Glyma.11G192900	AT5G22920	CHY-type/CTCHY-type/RING-type Zinc finger protein		NA	NA	GO:0008270	zinc ion binding	GO:0005634	nucleus
Glyma.11G197300	AT4G39950	cytochrome P450, family 79, subfamily B, polypeptide 2		GO:0002229 GO:0006569 GO:0006952 GO:0009414 GO:0009617 GO:0009625 GO:0009682 GO:0009684 GO:0010120 GO:0019344 GO:0019761 GO:0042742 GO:0052544	camalexin biosynthetic process; cysteine biosynthetic process; defense response; defense response by callose deposition in cell wall; defense response to bacterium; defense response to oomycetes; glucosinolate biosynthetic process; indoleacetic acid biosynthetic process; induced systemic resistance; response to bacterium; response to insect; response to water deprivation; tryptophan catabolic pro…	GO:0005506 GO:0009055 GO:0016705 GO:0019825 GO:0020037	electron carrier activity; heme binding; iron ion binding; oxidoreductase activity, acting on paired donors, with incorporation or reduction of molecular oxygen; oxygen binding	GO:0009507	chloroplast
Glyma.11G198300	AT3G48990	AMP-dependent synthetase and ligase family protein		GO:0010030 GO:0010167 GO:0010214 GO:0015706 GO:0033611 GO:0046482 GO:0046686 GO:0050832	defense response to fungus; nitrate transport; oxalate catabolic process; para-aminobenzoic acid metabolic process; positive regulation of seed germination; response to cadmium ion; response to nitrate; seed coat development	GO:0016208 GO:0050203	AMP binding; oxalate-CoA ligase activity	GO:0005737 GO:0005739 GO:0009506 GO:0009507 GO:0009570 GO:0048046	apoplast; chloroplast; chloroplast stroma; cytoplasm; mitochondrion; plasmodesma
Glyma.11G202000	AT1G57610	Protein of unknown function (DUF607)		GO:0008150	biological process	GO:0003674	molecular function	GO:0005575	cellular component
Glyma.11G204700	AT1G70530	cysteine-rich RLK (RECEPTOR-like protein kinase) 3		GO:0006468 GO:0009627 GO:0031347	protein phosphorylation; regulation of defense response; systemic acquired resistance	GO:0004672 GO:0004674 GO:0005524 GO:0016301 GO:0016772	ATP binding; kinase activity; protein kinase activity; protein serine/threonine kinase activity; transferase activity, transferring phosphorus-containing groups	GO:0005576 GO:0005886	extracellular region; plasma membrane
Glyma.11G212100	AT3G52870	IQ calmodulin-binding motif family protein		GO:0008150	biological process	GO:0005516	calmodulin binding	GO:0009507	chloroplast
Glyma.11G218900	AT2G28930	protein kinase 1B		GO:0006468 GO:0006499	N-terminal protein myristoylation; protein phosphorylation	GO:0004672 GO:0004674 GO:0004713 GO:0005524 GO:0016301 GO:0016772	ATP binding; kinase activity; protein kinase activity; protein serine/threonine kinase activity; protein tyrosine kinase activity; transferase activity, transferring phosphorus-containing groups	GO:0005886 GO:0009507	chloroplast; plasma membrane
Glyma.11G219000	AT3G55470	Calcium-dependent lipid-binding (CaLB domain) family protein		GO:0006612 GO:0008150 GO:0009963 GO:0010363	biological process; positive regulation of flavonoid biosynthetic process; protein targeting to membrane; regulation of plant-type hypersensitive response	GO:0003674	molecular function	NA	NA
Glyma.11G220500	AT2G04660	anaphase-promoting complex/cyclosome 2		GO:0006511 GO:0007267 GO:0007276 GO:0009561 GO:0009616 GO:0010267 GO:0032875 GO:0035196 GO:0051302 GO:0051510	cell-cell signaling; gamete generation; megagametogenesis; production of miRNAs involved in gene silencing by miRNA; production of ta-siRNAs involved in RNA interference; regulation of DNA endoreduplication; regulation of cell division; regulation of unidimensional cell growth; ubiquitin-dependent protein catabolic process; virus induced gene silencing	GO:0004842 GO:0005515 GO:0031625	protein binding; ubiquitin-protein ligase activity; ubiquitin protein ligase binding	GO:0000151 GO:0005634 GO:0005819 GO:0031461	cullin-RING ubiquitin ligase complex; nucleus; spindle; ubiquitin ligase complex
Glyma.11G220900	AT3G55550	Concanavalin A-like lectin protein kinase family protein		GO:0006468	protein phosphorylation	GO:0004672 GO:0004674 GO:0005524 GO:0016301 GO:0016772	ATP binding; kinase activity; protein kinase activity; protein serine/threonine kinase activity; transferase activity, transferring phosphorus-containing groups	GO:0005886	plasma membrane
Glyma.11G233100	AT2G40320	TRICHOME BIREFRINGENCE-LIKE 33		GO:0008150	biological process	NA	NA	GO:0009507	chloroplast
Glyma.11G233900	AT5G34930	arogenate dehydrogenase		GO:0006567 GO:0006571 GO:0055114	oxidation-reduction process; threonine catabolic process; tyrosine biosynthetic process	GO:0000166 GO:0004665 GO:0008977	nucleotide binding; prephenate dehydrogenase (NADP+) activity; prephenate dehydrogenase activity	GO:0005739	mitochondrion
Glyma.11G235800	AT4G39640	gamma-glutamyl transpeptidase 1		GO:0006751 GO:0006979 GO:0009611 GO:0009625 GO:0009862 GO:0031348	glutathione catabolic process; negative regulation of defense response; response to insect; response to oxidative stress; response to wounding; systemic acquired resistance, salicylic acid mediated signaling pathway	GO:0003840 GO:0016756	gamma-glutamyltransferase activity; glutathione gamma-glutamylcysteinyltransferase activity	GO:0005576 GO:0009505 GO:0009506 GO:0048046	apoplast; extracellular region; plant-type cell wall; plasmodesma
Glyma.11G241500	AT5G65280	GCR2-like 1		NA	NA	GO:0003824	catalytic activity	GO:0005737 GO:0019898	cytoplasm; extrinsic to membrane
Glyma.11G243900	AT3G55270	mitogen-activated protein kinase phosphatase 1		GO:0006470 GO:0006487 GO:0006499 GO:0006888 GO:0006970 GO:0009409 GO:0009651 GO:0010224 GO:0010225 GO:0010374 GO:0016311 GO:0035556 GO:0043090 GO:0048481	ER to Golgi vesicle-mediated transport; N-terminal protein myristoylation; amino acid import; dephosphorylation; intracellular signal transduction; ovule development; protein N-linked glycosylation; protein dephosphorylation; response to UV-B; response to UV-C; response to cold; response to osmotic stress; response to salt stress; stomatal complex development	GO:0004725 GO:0008138 GO:0016791 GO:0017017	MAP kinase tyrosine/serine/threonine phosphatase activity; phosphatase activity; protein tyrosine/serine/threonine phosphatase activity; protein tyrosine phosphatase activity	GO:0005634 GO:0005829	cytosol; nucleus
Glyma.12G011700	AT3G46530	NB-ARC domain-containing disease resistance protein		GO:0006952 GO:0009626 GO:0009814	defense response; defense response, incompatible interaction; plant-type hypersensitive response	GO:0043531	ADP binding	GO:0005634 GO:0005737 GO:0005886	cytoplasm; nucleus; plasma membrane
Glyma.12G022700	AT2G17040	NAC domain containing protein 36	NAC	GO:0000165 GO:0006355 GO:0007275 GO:0009814 GO:0009965 GO:0010200 GO:0045792 GO:0048281	MAPK cascade; defense response, incompatible interaction; inflorescence morphogenesis; leaf morphogenesis; multicellular organismal development; negative regulation of cell size; regulation of transcription, DNA-dependent; response to chitin	GO:0003677 GO:0003700	DNA binding; sequence-specific DNA binding transcription factor activity	GO:0005634	nucleus
Glyma.12G022800	AT3G45970	expansin-like A1		GO:0009826 GO:0009828	plant-type cell wall loosening; unidimensional cell growth	NA	NA	GO:0005576 GO:0005618 GO:0005794 GO:0009505 GO:0009506	Golgi apparatus; cell wall; extracellular region; plant-type cell wall; plasmodesma
Glyma.12G023300	AT1G76160	SKU5 similar 5		GO:0016126 GO:0052541 GO:0052546 GO:0055114	cell wall pectin metabolic process; oxidation-reduction process; plant-type cell wall cellulose metabolic process; sterol biosynthetic process	GO:0005507 GO:0016491	copper ion binding; oxidoreductase activity	GO:0005576 GO:0005618 GO:0009505 GO:0009506 GO:0048046	apoplast; cell wall; extracellular region; plant-type cell wall; plasmodesma
Glyma.12G028200	AT3G19830	Calcium-dependent lipid-binding (CaLB domain) family protein		GO:0008150	biological process	GO:0003674	molecular function	GO:0005886	plasma membrane
Glyma.12G032900	AT2G16750	Protein kinase protein with adenine nucleotide alpha hydrolases-like domain		GO:0006468	protein phosphorylation	GO:0004672 GO:0004674 GO:0005524 GO:0016301 GO:0016772	ATP binding; kinase activity; protein kinase activity; protein serine/threonine kinase activity; transferase activity, transferring phosphorus-containing groups	GO:0005886	plasma membrane
Glyma.12G042400	AT4G39210	Glucose-1-phosphate adenylyltransferase family protein		GO:0009058 GO:0009853 GO:0019252	biosynthetic process; photorespiration; starch biosynthetic process	GO:0008878 GO:0016779	glucose-1-phosphate adenylyltransferase activity; nucleotidyltransferase activity	GO:0009507	chloroplast
Glyma.12G049300	AT4G28460	NA		GO:0008150	biological process	GO:0003674	molecular function	GO:0005576	extracellular region
Glyma.12G053900	AT5G44640	beta glucosidase 13		GO:0005975	carbohydrate metabolic process	GO:0003824 GO:0004553 GO:0043169	catalytic activity; cation binding; hydrolase activity, hydrolyzing O-glycosyl compounds	GO:0005576 GO:0005794	Golgi apparatus; extracellular region
Glyma.12G054100	AT2G44480	beta glucosidase 17		GO:0005975	carbohydrate metabolic process	GO:0003824 GO:0004553 GO:0043169	catalytic activity; cation binding; hydrolase activity, hydrolyzing O-glycosyl compounds	GO:0005576	extracellular region
Glyma.12G054200	AT2G44480	beta glucosidase 17		GO:0005975	carbohydrate metabolic process	GO:0003824 GO:0004553 GO:0043169	catalytic activity; cation binding; hydrolase activity, hydrolyzing O-glycosyl compounds	GO:0005576	extracellular region
Glyma.12G062700	AT2G39700	expansin A4		GO:0006949 GO:0009664 GO:0009826 GO:0009828 GO:0009831	plant-type cell wall loosening; plant-type cell wall modification involved in multidimensional cell growth; plant-type cell wall organization; syncytium formation; unidimensional cell growth	NA	NA	GO:0005576 GO:0005829 GO:0009505 GO:0009506	cytosol; extracellular region; plant-type cell wall; plasmodesma
Glyma.12G065900	AT5G59790	Domain of unknown function (DUF966)		GO:0008150	biological process	GO:0003674	molecular function	GO:0005634	nucleus
Glyma.12G072000	AT1G07900	LOB domain-containing protein 1	LBD	GO:0008150	biological process	NA	NA	GO:0005634 GO:0005739	mitochondrion; nucleus
Glyma.12G073000	AT3G45640	mitogen-activated protein kinase 3		GO:0000165 GO:0000169 GO:0001666 GO:0006355 GO:0006612 GO:0006970 GO:0006979 GO:0007165 GO:0009409 GO:0009595 GO:0009611 GO:0009617 GO:0009697 GO:0009738 GO:0009814 GO:0009862 GO:0009863 GO:0009867 GO:0010120 GO:0010200 GO:0010224 GO:0010229 GO:0010310 GO:0010363 GO:0010374 GO:0019684 GO:0031347 GO:0031348 GO:0035304 GO:0035556 GO:0042742 GO:0043069 GO:0043900 GO:0048481 GO:0050832 GO:0051707 GO:…	MAPK cascade; abscisic acid mediated signaling pathway; activation of MAPK activity involved in osmosensory signaling pathway; camalexin biosynthetic process; defense response, incompatible interaction; defense response to bacterium; defense response to fungus; detection of biotic stimulus; inflorescence development; intracellular signal transduction; jasmonic acid mediated signaling pathway; neg…	GO:0004672 GO:0004707 GO:0005515 GO:0016301	MAP kinase activity; kinase activity; protein binding; protein kinase activity	GO:0005634	nucleus
Glyma.12G076800	AT2G28260	cyclic nucleotide-gated channel 15		GO:0006811 GO:0006813 GO:0055085	ion transport; potassium ion transport; transmembrane transport	GO:0005216 GO:0005249 GO:0005261 GO:0005516 GO:0030551	calmodulin binding; cation channel activity; cyclic nucleotide binding; ion channel activity; voltage-gated potassium channel activity	GO:0005886 GO:0016020	membrane; plasma membrane
Glyma.12G091200	AT5G22380	NAC domain containing protein 90	NAC	GO:0006355 GO:0007275	multicellular organismal development; regulation of transcription, DNA-dependent	GO:0003677 GO:0003700	DNA binding; sequence-specific DNA binding transcription factor activity	GO:0005634	nucleus
Glyma.12G097200	AT1G05100	mitogen-activated protein kinase kinase kinase 18		GO:0006468	protein phosphorylation	GO:0004672 GO:0004674 GO:0005524 GO:0016301 GO:0016772	ATP binding; kinase activity; protein kinase activity; protein serine/threonine kinase activity; transferase activity, transferring phosphorus-containing groups	NA	NA
Glyma.12G104500	AT2G31180	myb domain protein 14	MYB	GO:0006355 GO:0009651 GO:0009723 GO:0009733 GO:0009751 GO:0009753	regulation of transcription, DNA-dependent; response to auxin stimulus; response to ethylene stimulus; response to jasmonic acid stimulus; response to salicylic acid stimulus; response to salt stress	GO:0003677 GO:0003700	DNA binding; sequence-specific DNA binding transcription factor activity	GO:0005634	nucleus
Glyma.12G105400	AT2G31180	myb domain protein 14	MYB	GO:0006355 GO:0009651 GO:0009723 GO:0009733 GO:0009751 GO:0009753	regulation of transcription, DNA-dependent; response to auxin stimulus; response to ethylene stimulus; response to jasmonic acid stimulus; response to salicylic acid stimulus; response to salt stress	GO:0003677 GO:0003700	DNA binding; sequence-specific DNA binding transcription factor activity	GO:0005634	nucleus
Glyma.12G114300	AT4G20970	basic helix-loop-helix (bHLH) DNA-binding superfamily protein	bHLH	GO:0006355 GO:0050832	defense response to fungus; regulation of transcription, DNA-dependent	GO:0003677 GO:0003700	DNA binding; sequence-specific DNA binding transcription factor activity	GO:0005634	nucleus
Glyma.12G116800	AT4G28400	Protein phosphatase 2C family protein		GO:0009627 GO:0031347 GO:0031348	negative regulation of defense response; regulation of defense response; systemic acquired resistance	GO:0003824 GO:0004722	catalytic activity; protein serine/threonine phosphatase activity	GO:0005575	cellular component
Glyma.12G130000	AT2G42750	DNAJ heat shock N-terminal domain-containing protein		GO:0006457	protein folding	GO:0031072 GO:0051082 GO:0051536	heat shock protein binding; iron-sulfur cluster binding; unfolded protein binding	GO:0009507	chloroplast
Glyma.12G131800	AT3G58720	RING/U-box superfamily protein		NA	NA	GO:0008270	zinc ion binding	NA	NA
Glyma.12G131900	NA	NA		NA	NA	NA	NA	NA	NA
Glyma.12G135600	AT5G11250	Disease resistance protein (TIR-NBS-LRR class)		GO:0006952 GO:0007165	defense response; signal transduction	GO:0043531	ADP binding	GO:0005622	intracellular
Glyma.12G137700	AT5G48150	GRAS family transcription factor	GRAS	GO:0009640	photomorphogenesis	GO:0003700 GO:0004871	sequence-specific DNA binding transcription factor activity; signal transducer activity	GO:0005634 GO:0005737	cytoplasm; nucleus
Glyma.12G140300	AT4G27290	S-locus lectin protein kinase family protein		GO:0006468 GO:0048544 GO:0048765	protein phosphorylation; recognition of pollen; root hair cell differentiation	GO:0004672 GO:0004674 GO:0004713 GO:0005524 GO:0016772 GO:0030246	ATP binding; carbohydrate binding; protein kinase activity; protein serine/threonine kinase activity; protein tyrosine kinase activity; transferase activity, transferring phosphorus-containing groups	GO:0005886	plasma membrane
Glyma.12G149100	AT4G27410	NAC (No Apical Meristem) domain transcriptional regulator superfamily protein	NAC	GO:0006355 GO:0007165 GO:0007275 GO:0009409 GO:0009414 GO:0009611 GO:0009723 GO:0009733 GO:0009737 GO:0009738 GO:0009753 GO:0042538 GO:0045893	abscisic acid mediated signaling pathway; hyperosmotic salinity response; multicellular organismal development; positive regulation of transcription, DNA-dependent; regulation of transcription, DNA-dependent; response to abscisic acid stimulus; response to auxin stimulus; response to cold; response to ethylene stimulus; response to jasmonic acid stimulus; response to water deprivation; response t…	GO:0003677 GO:0003700	DNA binding; sequence-specific DNA binding transcription factor activity	GO:0005634	nucleus
Glyma.12G161500	AT5G53970	Tyrosine transaminase family protein		GO:0009058 GO:0010189	biosynthetic process; vitamin E biosynthetic process	GO:0004838 GO:0008483	L-tyrosine:2-oxoglutarate aminotransferase activity; transaminase activity	GO:0005737	cytoplasm
Glyma.12G170500	AT4G22200	potassium transport 2/3		GO:0006811 GO:0006813 GO:0009737 GO:0010264 GO:0042391 GO:0055085	ion transport; myo-inositol hexakisphosphate biosynthetic process; potassium ion transport; regulation of membrane potential; response to abscisic acid stimulus; transmembrane transport	GO:0005216 GO:0005242 GO:0005249 GO:0005515 GO:0030551 GO:0042802	cyclic nucleotide binding; identical protein binding; inward rectifier potassium channel activity; ion channel activity; protein binding; voltage-gated potassium channel activity	GO:0009506 GO:0016020	membrane; plasmodesma
Glyma.12G173500	AT5G60570	Galactose oxidase/kelch repeat superfamily protein		GO:0008150	biological process	GO:0003674	molecular function	GO:0005634	nucleus
Glyma.12G185400	AT2G27480	Calcium-binding EF-hand family protein		GO:0008150	biological process	GO:0005509	calcium ion binding	GO:0005737	cytoplasm
Glyma.12G192600	AT5G42570	B-cell receptor-associated 31-like		GO:0006886	intracellular protein transport	GO:0003674	molecular function	GO:0005774 GO:0005783 GO:0009506 GO:0009507 GO:0016021	chloroplast; endoplasmic reticulum; integral to membrane; plasmodesma; vacuolar membrane
Glyma.12G197500	AT4G16730	terpene synthase 02		GO:0008152	metabolic process	GO:0000287 GO:0010333 GO:0016829	lyase activity; magnesium ion binding; terpene synthase activity	GO:0009507	chloroplast
Glyma.12G199200	AT3G23250	myb domain protein 15	MYB	GO:0002679 GO:0006355 GO:0007165 GO:0009414 GO:0009611 GO:0009651 GO:0009695 GO:0009723 GO:0009733 GO:0009737 GO:0009738 GO:0009753 GO:0009867 GO:0009873 GO:0010200 GO:0035556 GO:0042538 GO:0046686 GO:0052542	abscisic acid mediated signaling pathway; defense response by callose deposition; ethylene mediated signaling pathway; hyperosmotic salinity response; intracellular signal transduction; jasmonic acid biosynthetic process; jasmonic acid mediated signaling pathway; regulation of transcription, DNA-dependent; respiratory burst involved in defense response; response to abscisic acid stimulus; respons…	GO:0003677 GO:0003700	DNA binding; sequence-specific DNA binding transcription factor activity	GO:0005634	nucleus
Glyma.12G204300	AT4G28300	Protein of unknown function (DUF1421)		GO:0008150	biological process	GO:0003674	molecular function	GO:0005634	nucleus
Glyma.12G206800	AT1G28440	HAESA-like 1		GO:0000271 GO:0006468 GO:0007020 GO:0007169 GO:0007389 GO:0008361 GO:0009664 GO:0009825 GO:0009832 GO:0009926 GO:0009932 GO:0010015 GO:0010075 GO:0010817 GO:0040007 GO:0043481 GO:0048653 GO:0048767 GO:0071555	anther development; anthocyanin accumulation in tissues in response to UV light; auxin polar transport; cell tip growth; cell wall organization; growth; microtubule nucleation; multidimensional cell growth; pattern specification process; plant-type cell wall biogenesis; plant-type cell wall organization; polysaccharide biosynthetic process; protein phosphorylation; regulation of cell size; regula…	GO:0004672 GO:0004674 GO:0005524 GO:0016301 GO:0016772	ATP binding; kinase activity; protein kinase activity; protein serine/threonine kinase activity; transferase activity, transferring phosphorus-containing groups	GO:0005886	plasma membrane
Glyma.12G207400	AT1G28480	Thioredoxin superfamily protein		GO:0000165 GO:0006355 GO:0006612 GO:0007154 GO:0007165 GO:0009409 GO:0009410 GO:0009414 GO:0009611 GO:0009617 GO:0009693 GO:0009695 GO:0009723 GO:0009733 GO:0009738 GO:0009751 GO:0009753 GO:0009814 GO:0009862 GO:0009863 GO:0009867 GO:0010310 GO:0010363 GO:0030968 GO:0031348 GO:0035304 GO:0042538 GO:0042742 GO:0043069 GO:0045454 GO:0050832 GO:0051707	MAPK cascade; abscisic acid mediated signaling pathway; cell communication; cell redox homeostasis; defense response, incompatible interaction; defense response to bacterium; defense response to fungus; endoplasmic reticulum unfolded protein response; ethylene biosynthetic process; hyperosmotic salinity response; jasmonic acid biosynthetic process; jasmonic acid mediated signaling pathway; negati…	GO:0005515 GO:0009055 GO:0015035	electron carrier activity; protein binding; protein disulfide oxidoreductase activity	GO:0005737	cytoplasm
Glyma.12G215100	AT3G01440	PsbQ-like 1		GO:0000023 GO:0009767 GO:0015979 GO:0019252 GO:0019684 GO:0043085	maltose metabolic process; photosynthesis; photosynthesis, light reaction; photosynthetic electron transport chain; positive regulation of catalytic activity; starch biosynthetic process	GO:0005509 GO:0045156	calcium ion binding; electron transporter, transferring electrons within the cyclic electron transport pathway of photosynthesis activity	GO:0009344 GO:0009507 GO:0009523 GO:0009534 GO:0009535 GO:0009543 GO:0009654 GO:0019898 GO:0030095	chloroplast; chloroplast photosystem II; chloroplast thylakoid; chloroplast thylakoid lumen; chloroplast thylakoid membrane; extrinsic to membrane; nitrite reductase complex [NAD(P)H]; oxygen evolving complex; photosystem II
Glyma.12G217500	AT4G27280	Calcium-binding EF-hand family protein		GO:0009611 GO:0009612 GO:0010200 GO:0080167	response to chitin; response to karrikin; response to mechanical stimulus; response to wounding	GO:0005509	calcium ion binding	GO:0005886	plasma membrane
Glyma.12G236500	AT4G27220	NB-ARC domain-containing disease resistance protein		GO:0006952	defense response	GO:0043531	ADP binding	GO:0005634	nucleus
Glyma.13G004400	AT3G12750	zinc transporter 1 precursor		GO:0006826 GO:0006829 GO:0006833 GO:0010043 GO:0010106 GO:0030001 GO:0055085 GO:0071577	cellular response to iron ion starvation; iron ion transport; metal ion transport; response to zinc ion; transmembrane transport; water transport; zinc ion transmembrane transport; zinc ion transport	GO:0005385 GO:0046873	metal ion transmembrane transporter activity; zinc ion transmembrane transporter activity	GO:0005886 GO:0016020 GO:0016021	integral to membrane; membrane; plasma membrane
Glyma.13G005100	AT3G22160	VQ motif-containing protein		GO:0006612 GO:0008150 GO:0009414 GO:0009693 GO:0009737 GO:0009863 GO:0010363 GO:0042538 GO:0043069 GO:0051707	biological process; ethylene biosynthetic process; hyperosmotic salinity response; negative regulation of programmed cell death; protein targeting to membrane; regulation of plant-type hypersensitive response; response to abscisic acid stimulus; response to other organism; response to water deprivation; salicylic acid mediated signaling pathway	GO:0003674	molecular function	GO:0005634	nucleus
Glyma.13G005500	AT3G22142	Bifunctional inhibitor/lipid-transfer protein/seed storage 2S albumin superfamily protein		GO:0006869	lipid transport	NA	NA	GO:0005575	cellular component
Glyma.13G006700	AT5G47650	nudix hydrolase homolog 2		GO:0006979	response to oxidative stress	GO:0016787 GO:0047631 GO:0051287	ADP-ribose diphosphatase activity; NAD binding; hydrolase activity	GO:0005829	cytosol
Glyma.13G028100	AT5G17680	disease resistance protein (TIR-NBS-LRR class), putative		GO:0006952 GO:0007165	defense response; signal transduction	GO:0043531	ADP binding	GO:0005622	intracellular
Glyma.13G030300	AT3G45140	lipoxygenase 2		GO:0000023 GO:0000096 GO:0006546 GO:0006636 GO:0006733 GO:0006766 GO:0006816 GO:0007030 GO:0008652 GO:0009072 GO:0009106 GO:0009108 GO:0009117 GO:0009269 GO:0009409 GO:0009414 GO:0009416 GO:0009611 GO:0009617 GO:0009620 GO:0009651 GO:0009695 GO:0009737 GO:0009753 GO:0015994 GO:0015995 GO:0016117 GO:0019216 GO:0019252 GO:0019288 GO:0019748 GO:0030003 GO:0031408 GO:0034440 GO:0044272 GO:0051707 GO:…	Golgi organization; aromatic amino acid family metabolic process; calcium ion transport; carotenoid biosynthetic process; cellular amino acid biosynthetic process; cellular cation homeostasis; chlorophyll biosynthetic process; chlorophyll metabolic process; coenzyme biosynthetic process; divalent metal ion transport; glycine catabolic process; isopentenyl diphosphate biosynthetic process, mevalon…	GO:0005515 GO:0016165	lipoxygenase activity; protein binding	GO:0005737 GO:0009507 GO:0009535 GO:0009570 GO:0009941	chloroplast; chloroplast envelope; chloroplast stroma; chloroplast thylakoid membrane; cytoplasm
Glyma.13G035800	AT1G21240	wall associated kinase 3		GO:0006468	protein phosphorylation	GO:0004672 GO:0004674 GO:0005509 GO:0005524 GO:0016301 GO:0016772	ATP binding; calcium ion binding; kinase activity; protein kinase activity; protein serine/threonine kinase activity; transferase activity, transferring phosphorus-containing groups	GO:0005886	plasma membrane
Glyma.13G043800	AT1G17840	white-brown complex homolog protein 11		GO:0009611 GO:0009651 GO:0009737 GO:0015908 GO:0080051	cutin transport; fatty acid transport; response to abscisic acid stimulus; response to salt stress; response to wounding	GO:0000166 GO:0005524 GO:0015245 GO:0016887 GO:0017111 GO:0042626	ATP binding; ATPase activity; ATPase activity, coupled to transmembrane movement of substances; fatty acid transporter activity; nucleoside-triphosphatase activity; nucleotide binding	GO:0005886 GO:0009897 GO:0016020	external side of plasma membrane; membrane; plasma membrane
Glyma.13G067400	AT3G28420	Putative membrane lipoprotein		GO:0008150	biological process	GO:0003674	molecular function	GO:0005739	mitochondrion
Glyma.13G076900	AT5G21105	Plant L-ascorbate oxidase		GO:0016126 GO:0046520 GO:0055114	oxidation-reduction process; sphingoid biosynthetic process; sterol biosynthetic process	GO:0005507 GO:0008447 GO:0016491	L-ascorbate oxidase activity; copper ion binding; oxidoreductase activity	GO:0005576 GO:0005618 GO:0009506	cell wall; extracellular region; plasmodesma
Glyma.13G077000	NA	NA		NA	NA	NA	NA	NA	NA
Glyma.13G085800	NA	NA		NA	NA	NA	NA	NA	NA
Glyma.13G087500	NA	NA		NA	NA	NA	NA	NA	NA
Glyma.13G090300	AT1G22360	UDP-glucosyl transferase 85A2		GO:0008152	metabolic process	GO:0008194 GO:0015020 GO:0016757 GO:0016758	UDP-glycosyltransferase activity; glucuronosyltransferase activity; transferase activity, transferring glycosyl groups; transferase activity, transferring hexosyl groups	GO:0005634	nucleus
Glyma.13G095000	AT4G25810	xyloglucan endotransglycosylase 6		GO:0005975 GO:0006073	carbohydrate metabolic process; cellular glucan metabolic process	GO:0004553 GO:0016762 GO:0016798	hydrolase activity, acting on glycosyl bonds; hydrolase activity, hydrolyzing O-glycosyl compounds; xyloglucan:xyloglucosyl transferase activity	GO:0005576 GO:0005618 GO:0005794 GO:0048046	Golgi apparatus; apoplast; cell wall; extracellular region
Glyma.13G095200	AT4G25810	xyloglucan endotransglycosylase 6		GO:0005975 GO:0006073	carbohydrate metabolic process; cellular glucan metabolic process	GO:0004553 GO:0016762 GO:0016798	hydrolase activity, acting on glycosyl bonds; hydrolase activity, hydrolyzing O-glycosyl compounds; xyloglucan:xyloglucosyl transferase activity	GO:0005576 GO:0005618 GO:0005794 GO:0048046	Golgi apparatus; apoplast; cell wall; extracellular region
Glyma.13G095300	AT4G25810	xyloglucan endotransglycosylase 6		GO:0005975 GO:0006073	carbohydrate metabolic process; cellular glucan metabolic process	GO:0004553 GO:0016762 GO:0016798	hydrolase activity, acting on glycosyl bonds; hydrolase activity, hydrolyzing O-glycosyl compounds; xyloglucan:xyloglucosyl transferase activity	GO:0005576 GO:0005618 GO:0005794 GO:0048046	Golgi apparatus; apoplast; cell wall; extracellular region
Glyma.13G104700	AT5G56970	cytokinin oxidase 3		GO:0009690 GO:0009823 GO:0055114	cytokinin catabolic process; cytokinin metabolic process; oxidation-reduction process	GO:0003824 GO:0008131 GO:0008762 GO:0016491 GO:0016614 GO:0019139 GO:0050660	UDP-N-acetylmuramate dehydrogenase activity; catalytic activity; cytokinin dehydrogenase activity; flavin adenine dinucleotide binding; oxidoreductase activity; oxidoreductase activity, acting on CH-OH group of donors; primary amine oxidase activity	GO:0005576 GO:0005773	extracellular region; vacuole
Glyma.13G109800	AT2G06050	oxophytodienoate-reductase 3		GO:0006569 GO:0007165 GO:0009414 GO:0009611 GO:0009620 GO:0009684 GO:0009694 GO:0009695 GO:0009723 GO:0009733 GO:0009738 GO:0009753 GO:0009867 GO:0010193 GO:0042538 GO:0055114	abscisic acid mediated signaling pathway; hyperosmotic salinity response; indoleacetic acid biosynthetic process; jasmonic acid biosynthetic process; jasmonic acid mediated signaling pathway; jasmonic acid metabolic process; oxidation-reduction process; response to auxin stimulus; response to ethylene stimulus; response to fungus; response to jasmonic acid stimulus; response to ozone; response to…	GO:0003824 GO:0010181 GO:0016491 GO:0016629	12-oxophytodienoate reductase activity; FMN binding; catalytic activity; oxidoreductase activity	GO:0005777	peroxisome
Glyma.13G112000	AT1G19180	jasmonate-zim-domain protein 1		GO:0000165 GO:0006612 GO:0007154 GO:0007165 GO:0009409 GO:0009414 GO:0009555 GO:0009611 GO:0009620 GO:0009695 GO:0009723 GO:0009733 GO:0009738 GO:0009753 GO:0009862 GO:0009863 GO:0009867 GO:0009908 GO:0010200 GO:0010363 GO:0030968 GO:0031348 GO:0035556 GO:0042538 GO:0042742 GO:0043069 GO:0050832	MAPK cascade; abscisic acid mediated signaling pathway; cell communication; defense response to bacterium; defense response to fungus; endoplasmic reticulum unfolded protein response; flower development; hyperosmotic salinity response; intracellular signal transduction; jasmonic acid biosynthetic process; jasmonic acid mediated signaling pathway; negative regulation of defense response; negative …	GO:0005515	protein binding	GO:0005634	nucleus
Glyma.13G115900	AT3G43430	RING/U-box superfamily protein		NA	NA	GO:0008270	zinc ion binding	NA	NA
Glyma.13G117600	AT4G04450	WRKY family transcription factor	WRKY	GO:0006355 GO:0045892	negative regulation of transcription, DNA-dependent; regulation of transcription, DNA-dependent	GO:0003700 GO:0043565	sequence-specific DNA binding; sequence-specific DNA binding transcription factor activity	GO:0005634	nucleus
Glyma.13G118300	AT1G48300	NA		GO:0008152 GO:0019432	metabolic process; triglyceride biosynthetic process	GO:0004144	diacylglycerol O-acyltransferase activity	GO:0005829	cytosol
Glyma.13G119500	AT3G17510	CBL-interacting protein kinase 1		GO:0006468 GO:0006970 GO:0007165 GO:0009651 GO:0009737 GO:0010118 GO:0019722	calcium-mediated signaling; protein phosphorylation; response to abscisic acid stimulus; response to osmotic stress; response to salt stress; signal transduction; stomatal movement	GO:0004672 GO:0004674 GO:0004713 GO:0005515 GO:0005524 GO:0016301 GO:0016772	ATP binding; kinase activity; protein binding; protein kinase activity; protein serine/threonine kinase activity; protein tyrosine kinase activity; transferase activity, transferring phosphorus-containing groups	GO:0005886	plasma membrane
Glyma.13G132400	AT3G53620	pyrophosphorylase 4		GO:0006796 GO:0008152 GO:0046686	metabolic process; phosphate-containing compound metabolic process; response to cadmium ion	GO:0000287 GO:0004427	inorganic diphosphatase activity; magnesium ion binding	GO:0005737 GO:0005829 GO:0016020	cytoplasm; cytosol; membrane
Glyma.13G151200	AT5G03720	heat shock transcription factor A3	HSF	GO:0006355 GO:0009408 GO:0010200	regulation of transcription, DNA-dependent; response to chitin; response to heat	GO:0003677 GO:0003700 GO:0043565	DNA binding; sequence-specific DNA binding; sequence-specific DNA binding transcription factor activity	GO:0005634	nucleus
Glyma.13G154000	AT5G03880	Thioredoxin family protein		GO:0019684 GO:0035304 GO:0045454	cell redox homeostasis; photosynthesis, light reaction; regulation of protein dephosphorylation	GO:0009055	electron carrier activity	GO:0009507 GO:0009534 GO:0009535 GO:0009941	chloroplast; chloroplast envelope; chloroplast thylakoid; chloroplast thylakoid membrane
Glyma.13G158200	AT5G26330	Cupredoxin superfamily protein		GO:0010413 GO:0042546 GO:0044036 GO:0045492	cell wall biogenesis; cell wall macromolecule metabolic process; glucuronoxylan metabolic process; xylan biosynthetic process	GO:0005507 GO:0009055	copper ion binding; electron carrier activity	GO:0005886 GO:0031225	anchored to membrane; plasma membrane
Glyma.13G161500	AT5G20270	heptahelical transmembrane protein1		GO:0009651 GO:0009725 GO:0009744	response to hormone stimulus; response to salt stress; response to sucrose stimulus	GO:0004872	receptor activity	GO:0005634 GO:0016021	integral to membrane; nucleus
Glyma.13G161900	AT5G34850	purple acid phosphatase 26		GO:0006970 GO:0046686 GO:0055062	phosphate ion homeostasis; response to cadmium ion; response to osmotic stress	GO:0003993 GO:0004722	acid phosphatase activity; protein serine/threonine phosphatase activity	GO:0005576 GO:0005773 GO:0005829 GO:0009505	cytosol; extracellular region; plant-type cell wall; vacuole
Glyma.13G167100	AT2G41480	Peroxidase superfamily protein		GO:0000041 GO:0009664 GO:0009808	lignin metabolic process; plant-type cell wall organization; transition metal ion transport	GO:0004601 GO:0020037	heme binding; peroxidase activity	GO:0005576	extracellular region
Glyma.13G176600	AT1G28380	MAC/Perforin domain-containing protein		GO:0000165 GO:0002679 GO:0006612 GO:0006820 GO:0006862 GO:0006888 GO:0006944 GO:0006955 GO:0006984 GO:0008219 GO:0009595 GO:0009626 GO:0009627 GO:0009651 GO:0009697 GO:0009862 GO:0009863 GO:0009867 GO:0010200 GO:0010310 GO:0010337 GO:0010363 GO:0015696 GO:0015802 GO:0031347 GO:0031348 GO:0034976 GO:0042742 GO:0043069 GO:0043090 GO:0043269 GO:0043900 GO:0045087 GO:0050832 GO:0051707 GO:0052542	ER-nucleus signaling pathway; ER to Golgi vesicle-mediated transport; MAPK cascade; amino acid import; ammonium transport; anion transport; basic amino acid transport; cell death; cellular membrane fusion; defense response by callose deposition; defense response to bacterium; defense response to fungus; detection of biotic stimulus; immune response; innate immune response; jasmonic acid mediated …	GO:0003674	molecular function	GO:0005634	nucleus
Glyma.13G186600	AT5G13750	zinc induced facilitator-like 1		GO:0009414 GO:0009630 GO:0010540 GO:0048364 GO:0080167 GO:0090333	basipetal auxin transport; gravitropism; regulation of stomatal closure; response to karrikin; response to water deprivation; root development	GO:0022821	potassium ion antiporter activity	GO:0005886 GO:0009705	plant-type vacuole membrane; plasma membrane
Glyma.13G190500	NA	NA		NA	NA	NA	NA	NA	NA
Glyma.13G207100	AT5G19190	NA		GO:0008150	biological process	GO:0003674	molecular function	GO:0005634	nucleus
Glyma.13G213700	NA	NA		NA	NA	NA	NA	NA	NA
Glyma.13G219100	AT1G30135	jasmonate-zim-domain protein 8		GO:0008150 GO:0009611 GO:0009620 GO:0009693 GO:0009695 GO:0009753 GO:0009867	biological process; ethylene biosynthetic process; jasmonic acid biosynthetic process; jasmonic acid mediated signaling pathway; response to fungus; response to jasmonic acid stimulus; response to wounding	GO:0005515	protein binding	GO:0005634	nucleus
Glyma.13G221700	NA	NA		NA	NA	NA	NA	NA	NA
Glyma.13G226600	AT1G29290	NA		GO:0008150	biological process	GO:0003674	molecular function	NA	NA
Glyma.13G234500	AT1G28480	Thioredoxin superfamily protein		GO:0000165 GO:0006355 GO:0006612 GO:0007154 GO:0007165 GO:0009409 GO:0009410 GO:0009414 GO:0009611 GO:0009617 GO:0009693 GO:0009695 GO:0009723 GO:0009733 GO:0009738 GO:0009751 GO:0009753 GO:0009814 GO:0009862 GO:0009863 GO:0009867 GO:0010310 GO:0010363 GO:0030968 GO:0031348 GO:0035304 GO:0042538 GO:0042742 GO:0043069 GO:0045454 GO:0050832 GO:0051707	MAPK cascade; abscisic acid mediated signaling pathway; cell communication; cell redox homeostasis; defense response, incompatible interaction; defense response to bacterium; defense response to fungus; endoplasmic reticulum unfolded protein response; ethylene biosynthetic process; hyperosmotic salinity response; jasmonic acid biosynthetic process; jasmonic acid mediated signaling pathway; negati…	GO:0005515 GO:0009055 GO:0015035	electron carrier activity; protein binding; protein disulfide oxidoreductase activity	GO:0005737	cytoplasm
Glyma.13G239100	AT2G33770	phosphate 2		GO:0006301 GO:0006817 GO:0016036 GO:0055062	cellular response to phosphate starvation; phosphate ion homeostasis; phosphate ion transport; postreplication repair	GO:0004842 GO:0016881	acid-amino acid ligase activity; ubiquitin-protein ligase activity	GO:0005634	nucleus
Glyma.13G253300	AT1G09970	Leucine-rich receptor-like protein kinase family protein		GO:0002237 GO:0006468 GO:0006499 GO:0006612 GO:0006944 GO:0006979 GO:0007165 GO:0007169 GO:0009627 GO:0009845 GO:0010103 GO:0010363 GO:0031347 GO:0043069 GO:0046777 GO:0048443	N-terminal protein myristoylation; cellular membrane fusion; negative regulation of programmed cell death; protein autophosphorylation; protein phosphorylation; protein targeting to membrane; regulation of defense response; regulation of plant-type hypersensitive response; response to molecule of bacterial origin; response to oxidative stress; seed germination; signal transduction; stamen develop…	GO:0004672 GO:0004674 GO:0005524 GO:0016301 GO:0016772	ATP binding; kinase activity; protein kinase activity; protein serine/threonine kinase activity; transferase activity, transferring phosphorus-containing groups	GO:0005886 GO:0070825	micropyle; plasma membrane
Glyma.13G279200	AT4G27450	Aluminium induced protein with YGL and LRDR motifs		GO:0001666 GO:0008150 GO:0009862 GO:0010310	biological process; regulation of hydrogen peroxide metabolic process; response to hypoxia; systemic acquired resistance, salicylic acid mediated signaling pathway	GO:0005515	protein binding	GO:0005634 GO:0005829 GO:0005886 GO:0009506	cytosol; nucleus; plasma membrane; plasmodesma
Glyma.13G283600	AT5G54490	pinoid-binding protein 1		GO:0007165 GO:0009414 GO:0009693 GO:0009723 GO:0009733 GO:0009737 GO:0009738 GO:0009753 GO:0010583 GO:0042538	abscisic acid mediated signaling pathway; ethylene biosynthetic process; hyperosmotic salinity response; response to abscisic acid stimulus; response to auxin stimulus; response to cyclopentenone; response to ethylene stimulus; response to jasmonic acid stimulus; response to water deprivation; signal transduction	GO:0005509 GO:0005515	calcium ion binding; protein binding	GO:0005634	nucleus
Glyma.13G285200	AT5G23960	terpene synthase 21		GO:0008152 GO:0016106 GO:0051762 GO:0080027	metabolic process; response to herbivore; sesquiterpene biosynthetic process; sesquiterpenoid biosynthetic process	GO:0000287 GO:0010333 GO:0016829 GO:0080016 GO:0080017	(-)-E-beta-caryophyllene synthase activity; alpha-humulene synthase activity; lyase activity; magnesium ion binding; terpene synthase activity	GO:0009507	chloroplast
Glyma.13G285500	AT5G54590	Protein kinase superfamily protein		GO:0006468 GO:0009409	protein phosphorylation; response to cold	GO:0004672 GO:0004674 GO:0004713 GO:0005516 GO:0005524 GO:0016772	ATP binding; calmodulin binding; protein kinase activity; protein serine/threonine kinase activity; protein tyrosine kinase activity; transferase activity, transferring phosphorus-containing groups	GO:0005886	plasma membrane
Glyma.13G297200	AT4G28300	Protein of unknown function (DUF1421)		GO:0008150	biological process	GO:0003674	molecular function	GO:0005634	nucleus
Glyma.13G302500	AT1G03495	HXXXD-type acyl-transferase family protein		NA	NA	GO:0016740 GO:0016747	transferase activity; transferase activity, transferring acyl groups other than amino-acyl groups	GO:0005737	cytoplasm
Glyma.13G315300	AT5G22380	NAC domain containing protein 90	NAC	GO:0006355 GO:0007275	multicellular organismal development; regulation of transcription, DNA-dependent	GO:0003677 GO:0003700	DNA binding; sequence-specific DNA binding transcription factor activity	GO:0005634	nucleus
Glyma.13G316200	AT2G27500	Glycosyl hydrolase superfamily protein		GO:0005975 GO:0006612 GO:0009863 GO:0009867 GO:0010363	carbohydrate metabolic process; jasmonic acid mediated signaling pathway; protein targeting to membrane; regulation of plant-type hypersensitive response; salicylic acid mediated signaling pathway	GO:0003824 GO:0004553 GO:0043169	catalytic activity; cation binding; hydrolase activity, hydrolyzing O-glycosyl compounds	GO:0005576 GO:0005634 GO:0005737 GO:0046658	anchored to plasma membrane; cytoplasm; extracellular region; nucleus
Glyma.13G329000	AT2G28510	Dof-type zinc finger DNA-binding family protein	Dof	GO:0006355	regulation of transcription, DNA-dependent	GO:0003677 GO:0003700 GO:0008270	DNA binding; sequence-specific DNA binding transcription factor activity; zinc ion binding	GO:0005634 GO:0005730	nucleolus; nucleus
Glyma.13G329800	NA	NA		NA	NA	NA	NA	NA	NA
Glyma.13G330800	NA	NA		NA	NA	NA	NA	NA	NA
Glyma.13G337900	AT5G59480	Haloacid dehalogenase-like hydrolase (HAD) superfamily protein		GO:0015824	proline transport	GO:0016787	hydrolase activity	GO:0005634	nucleus
Glyma.13G338300	AT5G59520	ZRT/IRT-like protein 2		GO:0000041 GO:0006826 GO:0006829 GO:0010106 GO:0010167 GO:0015706 GO:0030001 GO:0055085	cellular response to iron ion starvation; iron ion transport; metal ion transport; nitrate transport; response to nitrate; transition metal ion transport; transmembrane transport; zinc ion transport	GO:0005375 GO:0005385 GO:0016757 GO:0046873	copper ion transmembrane transporter activity; metal ion transmembrane transporter activity; transferase activity, transferring glycosyl groups; zinc ion transmembrane transporter activity	GO:0005886 GO:0016020	membrane; plasma membrane
Glyma.13G347800	AT1G55020	lipoxygenase 1		GO:0006952 GO:0009611 GO:0009695 GO:0009737 GO:0009753 GO:0009816 GO:0010311 GO:0030397 GO:0034440 GO:0040007 GO:0048364	defense response; defense response to bacterium, incompatible interaction; growth; jasmonic acid biosynthetic process; lateral root formation; lipid oxidation; membrane disassembly; response to abscisic acid stimulus; response to jasmonic acid stimulus; response to wounding; root development	GO:0016165	lipoxygenase activity	GO:0005737 GO:0009536	cytoplasm; plastid
Glyma.13G357500	AT1G52240	RHO guanyl-nucleotide exchange factor 11		GO:0000226 GO:0007017 GO:0009860 GO:0048364 GO:0080147	microtubule-based process; microtubule cytoskeleton organization; pollen tube growth; root development; root hair cell development	GO:0005089	Rho guanyl-nucleotide exchange factor activity	GO:0005634 GO:0005737 GO:0005875	cytoplasm; microtubule associated complex; nucleus
Glyma.13G362500	AT3G15605	nucleic acid binding		GO:0008150	biological process	GO:0003676	nucleic acid binding	GO:0005739	mitochondrion
Glyma.14G002600	AT1G30135	jasmonate-zim-domain protein 8		GO:0008150 GO:0009611 GO:0009620 GO:0009693 GO:0009695 GO:0009753 GO:0009867	biological process; ethylene biosynthetic process; jasmonic acid biosynthetic process; jasmonic acid mediated signaling pathway; response to fungus; response to jasmonic acid stimulus; response to wounding	GO:0005515	protein binding	GO:0005634	nucleus
Glyma.14G003800	AT3G13130	NA		GO:0008150	biological process	GO:0003674	molecular function	GO:0009507	chloroplast
Glyma.14G016000	AT1G50600	scarecrow-like 5	GRAS	GO:0006355	regulation of transcription, DNA-dependent	GO:0003700	sequence-specific DNA binding transcription factor activity	GO:0005634 GO:0005829	cytosol; nucleus
Glyma.14G023000	AT4G38460	geranylgeranyl reductase		GO:0008299	isoprenoid biosynthetic process	GO:0004161 GO:0005515	dimethylallyltranstransferase activity; protein binding	GO:0009507	chloroplast
Glyma.14G024400	AT1G27180	disease resistance protein (TIR-NBS-LRR class), putative		GO:0006952 GO:0007165	defense response; signal transduction	GO:0043531	ADP binding	GO:0005622 GO:0005737	cytoplasm; intracellular
Glyma.14G024500	AT1G27180	disease resistance protein (TIR-NBS-LRR class), putative		GO:0006952 GO:0007165	defense response; signal transduction	GO:0043531	ADP binding	GO:0005622 GO:0005737	cytoplasm; intracellular
Glyma.14G029700	AT2G42975	NA		GO:0008150	biological process	GO:0003674	molecular function	GO:0009507 GO:0009535	chloroplast; chloroplast thylakoid membrane
Glyma.14G040000	AT1G14370	protein kinase 2A		GO:0006468	protein phosphorylation	GO:0004672 GO:0004674 GO:0005524 GO:0016301 GO:0016772	ATP binding; kinase activity; protein kinase activity; protein serine/threonine kinase activity; transferase activity, transferring phosphorus-containing groups	GO:0005886 GO:0009507	chloroplast; plasma membrane
Glyma.14G048100	AT4G08850	Leucine-rich repeat receptor-like protein kinase family protein		GO:0006468 GO:0006857 GO:0006995 GO:0009627 GO:0031347	cellular response to nitrogen starvation; oligopeptide transport; protein phosphorylation; regulation of defense response; systemic acquired resistance	GO:0004672 GO:0004713 GO:0005524 GO:0016301 GO:0016772	ATP binding; kinase activity; protein kinase activity; protein tyrosine kinase activity; transferase activity, transferring phosphorus-containing groups	GO:0005634 GO:0005886 GO:0009506 GO:0016020	membrane; nucleus; plasma membrane; plasmodesma
Glyma.14G048900	AT1G05010	ethylene-forming enzyme		GO:0000165 GO:0006612 GO:0009595 GO:0009620 GO:0009693 GO:0009697 GO:0009862 GO:0009867 GO:0010200 GO:0010310 GO:0010363 GO:0030003 GO:0031348 GO:0042742 GO:0043900 GO:0050832 GO:0055114 GO:0070838 GO:0071398	MAPK cascade; cellular cation homeostasis; cellular response to fatty acid; defense response to bacterium; defense response to fungus; detection of biotic stimulus; divalent metal ion transport; ethylene biosynthetic process; jasmonic acid mediated signaling pathway; negative regulation of defense response; oxidation-reduction process; protein targeting to membrane; regulation of hydrogen peroxid…	GO:0009815 GO:0016491 GO:0016706	1-aminocyclopropane-1-carboxylate oxidase activity; oxidoreductase activity; oxidoreductase activity, acting on paired donors, with incorporation or reduction of molecular oxygen, 2-oxoglutarate as one donor, and incorporation of one atom each of oxygen into both donors	GO:0005737	cytoplasm
Glyma.14G049000	AT1G05010	ethylene-forming enzyme		GO:0000165 GO:0006612 GO:0009595 GO:0009620 GO:0009693 GO:0009697 GO:0009862 GO:0009867 GO:0010200 GO:0010310 GO:0010363 GO:0030003 GO:0031348 GO:0042742 GO:0043900 GO:0050832 GO:0055114 GO:0070838 GO:0071398	MAPK cascade; cellular cation homeostasis; cellular response to fatty acid; defense response to bacterium; defense response to fungus; detection of biotic stimulus; divalent metal ion transport; ethylene biosynthetic process; jasmonic acid mediated signaling pathway; negative regulation of defense response; oxidation-reduction process; protein targeting to membrane; regulation of hydrogen peroxid…	GO:0009815 GO:0016491 GO:0016706	1-aminocyclopropane-1-carboxylate oxidase activity; oxidoreductase activity; oxidoreductase activity, acting on paired donors, with incorporation or reduction of molecular oxygen, 2-oxoglutarate as one donor, and incorporation of one atom each of oxygen into both donors	GO:0005737	cytoplasm
Glyma.14G049100	NA	NA		NA	NA	NA	NA	NA	NA
Glyma.14G049200	AT1G05010	ethylene-forming enzyme		GO:0000165 GO:0006612 GO:0009595 GO:0009620 GO:0009693 GO:0009697 GO:0009862 GO:0009867 GO:0010200 GO:0010310 GO:0010363 GO:0030003 GO:0031348 GO:0042742 GO:0043900 GO:0050832 GO:0055114 GO:0070838 GO:0071398	MAPK cascade; cellular cation homeostasis; cellular response to fatty acid; defense response to bacterium; defense response to fungus; detection of biotic stimulus; divalent metal ion transport; ethylene biosynthetic process; jasmonic acid mediated signaling pathway; negative regulation of defense response; oxidation-reduction process; protein targeting to membrane; regulation of hydrogen peroxid…	GO:0009815 GO:0016491 GO:0016706	1-aminocyclopropane-1-carboxylate oxidase activity; oxidoreductase activity; oxidoreductase activity, acting on paired donors, with incorporation or reduction of molecular oxygen, 2-oxoglutarate as one donor, and incorporation of one atom each of oxygen into both donors	GO:0005737	cytoplasm
Glyma.14G049700	AT2G32950	Transducin/WD40 repeat-like superfamily protein		GO:0006281 GO:0009640 GO:0009641 GO:0009647 GO:0009649 GO:0009963 GO:0010100 GO:0010119 GO:0010224 GO:0046283 GO:0048573 GO:0048608	DNA repair; anthocyanin-containing compound metabolic process; entrainment of circadian clock; negative regulation of photomorphogenesis; photomorphogenesis; photoperiodism, flowering; positive regulation of flavonoid biosynthetic process; regulation of stomatal movement; reproductive structure development; response to UV-B; shade avoidance; skotomorphogenesis	GO:0004842 GO:0005515	protein binding; ubiquitin-protein ligase activity	GO:0000152 GO:0005634 GO:0016604 GO:0080008	CUL4-RING ubiquitin ligase complex; nuclear body; nuclear ubiquitin ligase complex; nucleus
Glyma.14G051700	AT3G20180	Copper transport protein family		NA	NA	NA	NA	GO:0005575	cellular component
Glyma.14G057600	AT3G11090	LOB domain-containing protein 21	LBD	GO:0008150	biological process	NA	NA	GO:0005634	nucleus
Glyma.14G058700	AT5G05600	2-oxoglutarate (2OG) and Fe(II)-dependent oxygenase superfamily protein		GO:0009611 GO:0009620 GO:0009695 GO:0009753 GO:0009867 GO:0055114 GO:0080167	jasmonic acid biosynthetic process; jasmonic acid mediated signaling pathway; oxidation-reduction process; response to fungus; response to jasmonic acid stimulus; response to karrikin; response to wounding	GO:0005506 GO:0016491 GO:0016706	iron ion binding; oxidoreductase activity; oxidoreductase activity, acting on paired donors, with incorporation or reduction of molecular oxygen, 2-oxoglutarate as one donor, and incorporation of one atom each of oxygen into both donors	GO:0005737	cytoplasm
Glyma.14G061300	AT3G47080	Tetratricopeptide repeat (TPR)-like superfamily protein		NA	NA	NA	NA	GO:0005634	nucleus
Glyma.14G068000	AT2G39700	expansin A4		GO:0006949 GO:0009664 GO:0009826 GO:0009828 GO:0009831	plant-type cell wall loosening; plant-type cell wall modification involved in multidimensional cell growth; plant-type cell wall organization; syncytium formation; unidimensional cell growth	NA	NA	GO:0005576 GO:0005829 GO:0009505 GO:0009506	cytosol; extracellular region; plant-type cell wall; plasmodesma
Glyma.14G070200	AT3G60810	NA		GO:0008150	biological process	GO:0003674	molecular function	GO:0005575	cellular component
Glyma.14G073300	AT2G02360	phloem protein 2-B10		NA	NA	GO:0030246	carbohydrate binding	GO:0005634	nucleus
Glyma.14G082200	AT1G47380	Protein phosphatase 2C family protein		NA	NA	GO:0003824 GO:0004722	catalytic activity; protein serine/threonine phosphatase activity	GO:0005739 GO:0005829	cytosol; mitochondrion
Glyma.14G090000	AT4G07960	Cellulose-synthase-like C12		NA	NA	GO:0016757 GO:0016759	cellulose synthase activity; transferase activity, transferring glycosyl groups	GO:0005794 GO:0009506	Golgi apparatus; plasmodesma
Glyma.14G092800	AT4G32940	gamma vacuolar processing enzyme		GO:0006508 GO:0006624 GO:0006944 GO:0048193	Golgi vesicle transport; cellular membrane fusion; proteolysis; vacuolar protein processing	GO:0004197	cysteine-type endopeptidase activity	GO:0000323 GO:0005576	extracellular region; lytic vacuole
Glyma.14G098100	AT2G26310	Chalcone-flavanone isomerase family protein		GO:0042398	cellular modified amino acid biosynthetic process	GO:0005504	fatty acid binding	GO:0009570	chloroplast stroma
Glyma.14G103100	AT1G80840	WRKY DNA-binding protein 40	WRKY	GO:0000165 GO:0002237 GO:0002679 GO:0006355 GO:0006612 GO:0006944 GO:0009595 GO:0009611 GO:0009612 GO:0009620 GO:0009646 GO:0009695 GO:0009697 GO:0009723 GO:0009738 GO:0009751 GO:0009753 GO:0009862 GO:0009863 GO:0009867 GO:0009873 GO:0010200 GO:0010310 GO:0010363 GO:0016045 GO:0030968 GO:0031347 GO:0031348 GO:0035556 GO:0042742 GO:0043069 GO:0043900 GO:0050691 GO:0050776 GO:0050832	MAPK cascade; abscisic acid mediated signaling pathway; cellular membrane fusion; defense response to bacterium; defense response to fungus; detection of bacterium; detection of biotic stimulus; endoplasmic reticulum unfolded protein response; ethylene mediated signaling pathway; intracellular signal transduction; jasmonic acid biosynthetic process; jasmonic acid mediated signaling pathway; negat…	GO:0003700 GO:0005515 GO:0043565	protein binding; sequence-specific DNA binding; sequence-specific DNA binding transcription factor activity	GO:0005634	nucleus
Glyma.14G112500	AT5G35090	NA		GO:0009827 GO:0009860 GO:0048610 GO:0048868	cellular process involved in reproduction; plant-type cell wall modification; pollen tube development; pollen tube growth	NA	NA	GO:0005739	mitochondrion
Glyma.14G116400	AT3G11760	NA		GO:0008150	biological process	GO:0003674	molecular function	GO:0005634	nucleus
Glyma.14G118100	AT4G27700	Rhodanese/Cell cycle control phosphatase superfamily protein		GO:0000023 GO:0006098 GO:0007568 GO:0019252 GO:0043085	aging; maltose metabolic process; pentose-phosphate shunt; positive regulation of catalytic activity; starch biosynthetic process	GO:0003674	molecular function	GO:0009507 GO:0009534 GO:0009535 GO:0009941	chloroplast; chloroplast envelope; chloroplast thylakoid; chloroplast thylakoid membrane
Glyma.14G121200	AT1G77120	alcohol dehydrogenase 1		GO:0001666 GO:0006970 GO:0009651 GO:0009862 GO:0010310 GO:0045333 GO:0046686 GO:0055114	cellular respiration; oxidation-reduction process; regulation of hydrogen peroxide metabolic process; response to cadmium ion; response to hypoxia; response to osmotic stress; response to salt stress; systemic acquired resistance, salicylic acid mediated signaling pathway	GO:0004022	alcohol dehydrogenase (NAD) activity	GO:0005737 GO:0005829 GO:0005886	cytoplasm; cytosol; plasma membrane
Glyma.14G125300	AT2G35690	acyl-CoA oxidase 5		GO:0001676 GO:0002213 GO:0006631 GO:0006633 GO:0006635 GO:0008152 GO:0009555 GO:0009695 GO:0055114	defense response to insect; fatty acid beta-oxidation; fatty acid biosynthetic process; fatty acid metabolic process; jasmonic acid biosynthetic process; long-chain fatty acid metabolic process; metabolic process; oxidation-reduction process; pollen development	GO:0003995 GO:0003997 GO:0016627 GO:0050660	acyl-CoA dehydrogenase activity; acyl-CoA oxidase activity; flavin adenine dinucleotide binding; oxidoreductase activity, acting on the CH-CH group of donors	GO:0005777	peroxisome
Glyma.14G145700	AT5G25830	GATA transcription factor 12	GATA	GO:0006355 GO:0007623 GO:0009416 GO:0045893	circadian rhythm; positive regulation of transcription, DNA-dependent; regulation of transcription, DNA-dependent; response to light stimulus	GO:0003677 GO:0003700 GO:0008270 GO:0043565	DNA binding; sequence-specific DNA binding; sequence-specific DNA binding transcription factor activity; zinc ion binding	GO:0005634	nucleus
Glyma.14G145900	AT5G11580	Regulator of chromosome condensation (RCC1) family protein		GO:0008150	biological process	GO:0003682 GO:0008536	Ran GTPase binding; chromatin binding	GO:0005886	plasma membrane
Glyma.14G150000	AT1G21830	NA		GO:0008150	biological process	GO:0003674	molecular function	GO:0005634	nucleus
Glyma.14G157700	AT1G21270	wall-associated kinase 2		GO:0006468 GO:0009311 GO:0009751 GO:0009793 GO:0009826 GO:0009992 GO:0010027 GO:0010228 GO:0016226 GO:0019761 GO:0048481	cellular water homeostasis; embryo development ending in seed dormancy; glucosinolate biosynthetic process; iron-sulfur cluster assembly; oligosaccharide metabolic process; ovule development; protein phosphorylation; response to salicylic acid stimulus; thylakoid membrane organization; unidimensional cell growth; vegetative to reproductive phase transition of meristem	GO:0004672 GO:0004674 GO:0005509 GO:0005524 GO:0016772	ATP binding; calcium ion binding; protein kinase activity; protein serine/threonine kinase activity; transferase activity, transferring phosphorus-containing groups	GO:0005886	plasma membrane
Glyma.14G171800	AT5G65160	tetratricopeptide repeat (TPR)-containing protein		GO:0008150	biological process	NA	NA	NA	NA
Glyma.14G179200	AT4G24380	INVOLVED IN: 10-formyltetrahydrofolate biosynthetic process, folic acid and derivative biosynthetic process; EX		GO:0009257 GO:0009396 GO:0009611 GO:0009620 GO:0009693 GO:0009695 GO:0009753 GO:0015824	10-formyltetrahydrofolate biosynthetic process; ethylene biosynthetic process; folic acid-containing compound biosynthetic process; jasmonic acid biosynthetic process; proline transport; response to fungus; response to jasmonic acid stimulus; response to wounding	NA	NA	GO:0009507	chloroplast
Glyma.14G185300	AT5G65660	hydroxyproline-rich glycoprotein family protein		GO:0008150	biological process	GO:0003674	molecular function	GO:0005634 GO:0005886	nucleus; plasma membrane
Glyma.14G188300	AT5G24660	response to low sulfur 2		GO:0009658 GO:0031347 GO:0045893	chloroplast organization; positive regulation of transcription, DNA-dependent; regulation of defense response	GO:0003674	molecular function	GO:0005634	nucleus
Glyma.14G194300	AT5G05580	fatty acid desaturase 8		GO:0006629 GO:0006633 GO:0009266 GO:0055114	fatty acid biosynthetic process; lipid metabolic process; oxidation-reduction process; response to temperature stimulus	GO:0016717 GO:0042389	omega-3 fatty acid desaturase activity; oxidoreductase activity, acting on paired donors, with oxidation of a pair of donors resulting in the reduction of molecular oxygen to two molecules of water	GO:0009507 GO:0009941	chloroplast; chloroplast envelope
Glyma.14G199900	AT1G06980	NA		GO:0008150	biological process	GO:0003674	molecular function	NA	NA
Glyma.14G203700	AT5G58350	with no lysine (K) kinase 4		GO:0006468 GO:0010260 GO:0016036 GO:0019375 GO:0042631 GO:0046777	cellular response to phosphate starvation; cellular response to water deprivation; galactolipid biosynthetic process; organ senescence; protein autophosphorylation; protein phosphorylation	GO:0004672 GO:0004674 GO:0005524 GO:0016301 GO:0016772	ATP binding; kinase activity; protein kinase activity; protein serine/threonine kinase activity; transferase activity, transferring phosphorus-containing groups	GO:0005634 GO:0005737	cytoplasm; nucleus
Glyma.14G205100	AT5G58320	Kinase interacting (KIP1-like) family protein		GO:0008150	biological process	NA	NA	GO:0005576 GO:0005634 GO:0005737 GO:0005774 GO:0005884	actin filament; cytoplasm; extracellular region; nucleus; vacuolar membrane
Glyma.14G212200	AT1G66160	CYS, MET, PRO, and GLY protein 1		GO:0002679 GO:0010200 GO:0015824 GO:0016567 GO:0035556	intracellular signal transduction; proline transport; protein ubiquitination; respiratory burst involved in defense response; response to chitin	GO:0004842	ubiquitin-protein ligase activity	GO:0005737	cytoplasm
Glyma.14G222700	AT1G76140	Prolyl oligopeptidase family protein		GO:0006508 GO:0030244 GO:0048193	Golgi vesicle transport; cellulose biosynthetic process; proteolysis	GO:0004252 GO:0008236 GO:0070008	serine-type endopeptidase activity; serine-type exopeptidase activity; serine-type peptidase activity	GO:0009507	chloroplast
Glyma.15G013900	AT1G52360	Coatomer, beta' subunit		GO:0006094 GO:0006886 GO:0007010 GO:0010498 GO:0016192	cytoskeleton organization; gluconeogenesis; intracellular protein transport; proteasomal protein catabolic process; vesicle-mediated transport	GO:0005198	structural molecule activity	GO:0005737 GO:0005829 GO:0030117 GO:0030126	COPI vesicle coat; cytoplasm; cytosol; membrane coat
Glyma.15G015100	AT3G16030	lectin protein kinase family protein		GO:0009620 GO:0045087	innate immune response; response to fungus	GO:0004672 GO:0004674 GO:0004713 GO:0005524 GO:0016301 GO:0016772 GO:0030246	ATP binding; carbohydrate binding; kinase activity; protein kinase activity; protein serine/threonine kinase activity; protein tyrosine kinase activity; transferase activity, transferring phosphorus-containing groups	GO:0005886	plasma membrane
Glyma.15G015600	AT2G25737	Sulfite exporter TauE/SafE family protein		NA	NA	NA	NA	GO:0009507 GO:0016021	chloroplast; integral to membrane
Glyma.15G016800	AT1G52200	PLAC8 family protein		GO:0006569 GO:0006865 GO:0006979 GO:0009611 GO:0009684 GO:0010167 GO:0015706 GO:0030003 GO:0070838	amino acid transport; cellular cation homeostasis; divalent metal ion transport; indoleacetic acid biosynthetic process; nitrate transport; response to nitrate; response to oxidative stress; response to wounding; tryptophan catabolic process	GO:0003674	molecular function	GO:0005886	plasma membrane
Glyma.15G017000	AT1G52190	Major facilitator superfamily protein		GO:0006857	oligopeptide transport	GO:0005215	transporter activity	GO:0005886 GO:0016020	membrane; plasma membrane
Glyma.15G026500	AT1G55020	lipoxygenase 1		GO:0006952 GO:0009611 GO:0009695 GO:0009737 GO:0009753 GO:0009816 GO:0010311 GO:0030397 GO:0034440 GO:0040007 GO:0048364	defense response; defense response to bacterium, incompatible interaction; growth; jasmonic acid biosynthetic process; lateral root formation; lipid oxidation; membrane disassembly; response to abscisic acid stimulus; response to jasmonic acid stimulus; response to wounding; root development	GO:0016165	lipoxygenase activity	GO:0005737 GO:0009536	cytoplasm; plastid
Glyma.15G026900	AT1G72790	hydroxyproline-rich glycoprotein family protein		GO:0008150	biological process	GO:0003674	molecular function	GO:0005634 GO:0005829 GO:0005886	cytosol; nucleus; plasma membrane
Glyma.15G054300	AT1G22340	UDP-glucosyl transferase 85A7		GO:0008152	metabolic process	GO:0008194 GO:0015020 GO:0016757 GO:0016758	UDP-glycosyltransferase activity; glucuronosyltransferase activity; transferase activity, transferring glycosyl groups; transferase activity, transferring hexosyl groups	GO:0005634	nucleus
Glyma.15G054600	AT5G64260	EXORDIUM like 2		GO:0008150 GO:0046685	biological process; response to arsenic-containing substance	GO:0003674	molecular function	GO:0005618 GO:0005794 GO:0005829 GO:0009505 GO:0009506 GO:0009507	Golgi apparatus; cell wall; chloroplast; cytosol; plant-type cell wall; plasmodesma
Glyma.15G055700	AT5G64300	GTP cyclohydrolase II		GO:0009231 GO:0048767	riboflavin biosynthetic process; root hair elongation	GO:0003935 GO:0008686	3,4-dihydroxy-2-butanone-4-phosphate synthase activity; GTP cyclohydrolase II activity	GO:0009507 GO:0009570 GO:0016020	chloroplast; chloroplast stroma; membrane
Glyma.15G066100	AT1G11380	PLAC8 family protein		GO:0008150	biological process	GO:0003674	molecular function	GO:0005886	plasma membrane
Glyma.15G067100	AT4G21450	PapD-like superfamily protein		GO:0006499 GO:0006623 GO:0008150 GO:0032880	N-terminal protein myristoylation; biological process; protein targeting to vacuole; regulation of protein localization	GO:0005198	structural molecule activity	GO:0005634 GO:0005886	nucleus; plasma membrane
Glyma.15G072200	AT3G09010	Protein kinase superfamily protein		GO:0002237 GO:0006468 GO:0009581 GO:0009595 GO:0010200	detection of biotic stimulus; detection of external stimulus; protein phosphorylation; response to chitin; response to molecule of bacterial origin	GO:0004672 GO:0004674 GO:0005524 GO:0016301 GO:0016772	ATP binding; kinase activity; protein kinase activity; protein serine/threonine kinase activity; transferase activity, transferring phosphorus-containing groups	NA	NA
Glyma.15G078300	AT4G28500	NAC domain containing protein 73	NAC	GO:0006355 GO:0007275 GO:0010413 GO:0045492 GO:0045893 GO:2000652	glucuronoxylan metabolic process; multicellular organismal development; positive regulation of transcription, DNA-dependent; regulation of secondary cell wall biogenesis; regulation of transcription, DNA-dependent; xylan biosynthetic process	GO:0003677 GO:0003700	DNA binding; sequence-specific DNA binding transcription factor activity	GO:0005634	nucleus
Glyma.15G078600	AT1G28480	Thioredoxin superfamily protein		GO:0000165 GO:0006355 GO:0006612 GO:0007154 GO:0007165 GO:0009409 GO:0009410 GO:0009414 GO:0009611 GO:0009617 GO:0009693 GO:0009695 GO:0009723 GO:0009733 GO:0009738 GO:0009751 GO:0009753 GO:0009814 GO:0009862 GO:0009863 GO:0009867 GO:0010310 GO:0010363 GO:0030968 GO:0031348 GO:0035304 GO:0042538 GO:0042742 GO:0043069 GO:0045454 GO:0050832 GO:0051707	MAPK cascade; abscisic acid mediated signaling pathway; cell communication; cell redox homeostasis; defense response, incompatible interaction; defense response to bacterium; defense response to fungus; endoplasmic reticulum unfolded protein response; ethylene biosynthetic process; hyperosmotic salinity response; jasmonic acid biosynthetic process; jasmonic acid mediated signaling pathway; negati…	GO:0005515 GO:0009055 GO:0015035	electron carrier activity; protein binding; protein disulfide oxidoreductase activity	GO:0005737	cytoplasm
Glyma.15G082400	AT2G34140	Dof-type zinc finger DNA-binding family protein	Dof	GO:0006355	regulation of transcription, DNA-dependent	GO:0003677 GO:0003700 GO:0008270	DNA binding; sequence-specific DNA binding transcription factor activity; zinc ion binding	GO:0005634	nucleus
Glyma.15G088100	AT1G29690	MAC/Perforin domain-containing protein		GO:0000165 GO:0002679 GO:0006612 GO:0006944 GO:0006955 GO:0008219 GO:0009626 GO:0009862 GO:0009867 GO:0010200 GO:0010310 GO:0010337 GO:0010363 GO:0031348 GO:0042742 GO:0043069 GO:0050832 GO:0052542	MAPK cascade; cell death; cellular membrane fusion; defense response by callose deposition; defense response to bacterium; defense response to fungus; immune response; jasmonic acid mediated signaling pathway; negative regulation of defense response; negative regulation of programmed cell death; plant-type hypersensitive response; protein targeting to membrane; regulation of hydrogen peroxide met…	NA	NA	NA	NA
Glyma.15G093100	AT1G30135	jasmonate-zim-domain protein 8		GO:0008150 GO:0009611 GO:0009620 GO:0009693 GO:0009695 GO:0009753 GO:0009867	biological process; ethylene biosynthetic process; jasmonic acid biosynthetic process; jasmonic acid mediated signaling pathway; response to fungus; response to jasmonic acid stimulus; response to wounding	GO:0005515	protein binding	GO:0005634	nucleus
Glyma.15G107700	AT1G11700	Protein of unknown function, DUF584		GO:0008150	biological process	GO:0003674	molecular function	GO:0009507	chloroplast
Glyma.15G115200	AT5G47560	tonoplast dicarboxylate transporter		GO:0006814 GO:0006835 GO:0015743 GO:0035725 GO:0051453 GO:0055085	dicarboxylic acid transport; malate transport; regulation of intracellular pH; sodium ion transmembrane transport; sodium ion transport; transmembrane transport	GO:0005215 GO:0015140 GO:0017153	malate transmembrane transporter activity; sodium:dicarboxylate symporter activity; transporter activity	GO:0005773 GO:0016020	membrane; vacuole
Glyma.15G118000	AT4G17220	microtubule-associated proteins 70-5		GO:0007010 GO:0009832 GO:0010051 GO:0010413 GO:0045492	cytoskeleton organization; glucuronoxylan metabolic process; plant-type cell wall biogenesis; xylan biosynthetic process; xylem and phloem pattern formation	GO:0008017	microtubule binding	GO:0005737 GO:0005874	cytoplasm; microtubule
Glyma.15G122200	AT4G05030	Copper transport protein family		NA	NA	GO:0046872	metal ion binding	NA	NA
Glyma.15G128300	AT3G54950	patatin-like protein 6		GO:0006629 GO:0006644 GO:0008152 GO:0019374 GO:0051707	galactolipid metabolic process; lipid metabolic process; metabolic process; phospholipid metabolic process; response to other organism	GO:0004620 GO:0047617	acyl-CoA hydrolase activity; phospholipase activity	GO:0005886	plasma membrane
Glyma.15G128800	AT5G06720	peroxidase 2		GO:0002215 GO:0006979 GO:0009908 GO:0055114	defense response to nematode; flower development; oxidation-reduction process; response to oxidative stress	GO:0004601 GO:0020037	heme binding; peroxidase activity	GO:0005576 GO:0005794	Golgi apparatus; extracellular region
Glyma.15G129200	AT5G06730	Peroxidase superfamily protein		GO:0006979 GO:0055114	oxidation-reduction process; response to oxidative stress	GO:0004601 GO:0020037	heme binding; peroxidase activity	GO:0005576 GO:0005774	extracellular region; vacuolar membrane
Glyma.15G142200	NA	NA		NA	NA	NA	NA	NA	NA
Glyma.15G145900	NA	NA		NA	NA	NA	NA	NA	NA
Glyma.15G150300	AT5G49130	MATE efflux family protein		GO:0006855 GO:0055085	drug transmembrane transport; transmembrane transport	GO:0005215 GO:0015238 GO:0015297	antiporter activity; drug transmembrane transporter activity; transporter activity	GO:0005886 GO:0016020	membrane; plasma membrane
Glyma.15G160300	AT3G54070	Ankyrin repeat family protein		GO:0008150	biological process	NA	NA	GO:0005575	cellular component
Glyma.15G164100	AT2G19090	Protein of unknown function (DUF630 and DUF632)		GO:0006499	N-terminal protein myristoylation	GO:0003674	molecular function	GO:0005634	nucleus
Glyma.15G166800	AT5G57150	basic helix-loop-helix (bHLH) DNA-binding superfamily protein	bHLH	GO:0006355 GO:0009694 GO:0009753	jasmonic acid metabolic process; regulation of transcription, DNA-dependent; response to jasmonic acid stimulus	GO:0003677 GO:0003700	DNA binding; sequence-specific DNA binding transcription factor activity	GO:0005634	nucleus
Glyma.15G171000	AT4G33050	calmodulin-binding family protein		GO:0000165 GO:0002237 GO:0002679 GO:0006569 GO:0006612 GO:0006944 GO:0009581 GO:0009595 GO:0009625 GO:0009627 GO:0009646 GO:0009684 GO:0009697 GO:0009862 GO:0009863 GO:0009867 GO:0010119 GO:0010197 GO:0010200 GO:0010310 GO:0010363 GO:0030968 GO:0031347 GO:0031348 GO:0035556 GO:0042742 GO:0043069 GO:0043900 GO:0045087 GO:0050832	MAPK cascade; cellular membrane fusion; defense response to bacterium; defense response to fungus; detection of biotic stimulus; detection of external stimulus; endoplasmic reticulum unfolded protein response; indoleacetic acid biosynthetic process; innate immune response; intracellular signal transduction; jasmonic acid mediated signaling pathway; negative regulation of defense response; negativ…	GO:0005516	calmodulin binding	GO:0005634 GO:0005737	cytoplasm; nucleus
Glyma.15G179400	AT1G19150	photosystem I light harvesting complex gene 6		GO:0006098 GO:0006364 GO:0009637 GO:0009644 GO:0009744 GO:0009765 GO:0010114 GO:0010155 GO:0010218 GO:0015979 GO:0019288 GO:0019761 GO:0030003 GO:0070838	cellular cation homeostasis; divalent metal ion transport; glucosinolate biosynthetic process; isopentenyl diphosphate biosynthetic process, mevalonate-independent pathway; pentose-phosphate shunt; photosynthesis; photosynthesis, light harvesting; rRNA processing; regulation of proton transport; response to blue light; response to far red light; response to high light intensity; response to red l…	GO:0016168	chlorophyll binding	GO:0009507 GO:0016020 GO:0030076	chloroplast; light-harvesting complex; membrane
Glyma.15G201100	AT1G19250	flavin-dependent monooxygenase 1		GO:0009626 GO:0009627 GO:0009870 GO:0010204 GO:0042742 GO:0050832 GO:0051707 GO:0055114 GO:0071456	cellular response to hypoxia; defense response signaling pathway, resistance gene-dependent; defense response signaling pathway, resistance gene-independent; defense response to bacterium; defense response to fungus; oxidation-reduction process; plant-type hypersensitive response; response to other organism; systemic acquired resistance	GO:0004497 GO:0004499 GO:0016491 GO:0050660 GO:0050661	N,N-dimethylaniline monooxygenase activity; NADP binding; flavin adenine dinucleotide binding; monooxygenase activity; oxidoreductase activity	GO:0009507 GO:0031227	chloroplast; intrinsic to endoplasmic reticulum membrane
Glyma.15G201300	AT2G25620	DNA-binding protein phosphatase 1		GO:0006470 GO:0050688	protein dephosphorylation; regulation of defense response to virus	GO:0003824 GO:0004722	catalytic activity; protein serine/threonine phosphatase activity	GO:0005634 GO:0005737 GO:0005829	cytoplasm; cytosol; nucleus
Glyma.15G206800	AT4G19810	Glycosyl hydrolase family protein with chitinase insertion domain		GO:0005975 GO:0006032 GO:0009651 GO:0009737 GO:0009753	carbohydrate metabolic process; chitin catabolic process; response to abscisic acid stimulus; response to jasmonic acid stimulus; response to salt stress	GO:0003824 GO:0004553 GO:0004568 GO:0008843 GO:0035885 GO:0043169	catalytic activity; cation binding; chitinase activity; endochitinase activity; exochitinase activity; hydrolase activity, hydrolyzing O-glycosyl compounds	GO:0005576 GO:0005618	cell wall; extracellular region
Glyma.15G209300	AT5G06860	polygalacturonase inhibiting protein 1		GO:0000165 GO:0006612 GO:0006865 GO:0006952 GO:0007154 GO:0007165 GO:0009409 GO:0009738 GO:0009862 GO:0009867 GO:0010363 GO:0030968 GO:0031348 GO:0043069 GO:0050832	MAPK cascade; abscisic acid mediated signaling pathway; amino acid transport; cell communication; defense response; defense response to fungus; endoplasmic reticulum unfolded protein response; jasmonic acid mediated signaling pathway; negative regulation of defense response; negative regulation of programmed cell death; protein targeting to membrane; regulation of plant-type hypersensitive respon…	GO:0090353	polygalacturonase inhibitor activity	GO:0005576 GO:0005618 GO:0005794 GO:0009505 GO:0009506	Golgi apparatus; cell wall; extracellular region; plant-type cell wall; plasmodesma
Glyma.15G221300	AT4G34131	UDP-glucosyl transferase 73B3		GO:0008152 GO:0051707	metabolic process; response to other organism	GO:0008194 GO:0016758 GO:0035251 GO:0080043	UDP-glucosyltransferase activity; UDP-glycosyltransferase activity; quercetin 3-O-glucosyltransferase activity; transferase activity, transferring hexosyl groups	NA	NA
Glyma.15G227700	AT5G07050	nodulin MtN21 /EamA-like transporter family protein		NA	NA	NA	NA	GO:0009507 GO:0016020	chloroplast; membrane
Glyma.15G238400	AT2G38750	annexin 4		GO:0006970 GO:0009408 GO:0009409 GO:0009414 GO:0009651 GO:0009737	response to abscisic acid stimulus; response to cold; response to heat; response to osmotic stress; response to salt stress; response to water deprivation	GO:0005509 GO:0005544	calcium-dependent phospholipid binding; calcium ion binding	GO:0009506 GO:0009507 GO:0009986	cell surface; chloroplast; plasmodesma
Glyma.15G238500	AT2G38760	annexin 3		GO:0009408 GO:0009409 GO:0009414 GO:0009651	response to cold; response to heat; response to salt stress; response to water deprivation	GO:0005509 GO:0005544	calcium-dependent phospholipid binding; calcium ion binding	GO:0005773 GO:0009507 GO:0009986	cell surface; chloroplast; vacuole
Glyma.15G250100	AT3G14440	nine-cis-epoxycarotenoid dioxygenase 3		GO:0006970 GO:0009409 GO:0009414 GO:0009688 GO:0009737 GO:0042538	abscisic acid biosynthetic process; hyperosmotic salinity response; response to abscisic acid stimulus; response to cold; response to osmotic stress; response to water deprivation	GO:0045549	9-cis-epoxycarotenoid dioxygenase activity	GO:0009507 GO:0009535 GO:0009570	chloroplast; chloroplast stroma; chloroplast thylakoid membrane
Glyma.15G262800	AT3G12750	zinc transporter 1 precursor		GO:0006826 GO:0006829 GO:0006833 GO:0010043 GO:0010106 GO:0030001 GO:0055085 GO:0071577	cellular response to iron ion starvation; iron ion transport; metal ion transport; response to zinc ion; transmembrane transport; water transport; zinc ion transmembrane transport; zinc ion transport	GO:0005385 GO:0046873	metal ion transmembrane transporter activity; zinc ion transmembrane transporter activity	GO:0005886 GO:0016020 GO:0016021	integral to membrane; membrane; plasma membrane
Glyma.15G263600	AT2G44260	Plant protein of unknown function (DUF946)		GO:0006499	N-terminal protein myristoylation	GO:0003674	molecular function	GO:0009507	chloroplast
Glyma.15G272700	NA	NA		NA	NA	NA	NA	NA	NA
Glyma.16G008600	AT5G07990	Cytochrome P450 superfamily protein		GO:0009411 GO:0009718 GO:0009733 GO:0009744 GO:0009813 GO:0010224 GO:0055114	anthocyanin-containing compound biosynthetic process; flavonoid biosynthetic process; oxidation-reduction process; response to UV; response to UV-B; response to auxin stimulus; response to sucrose stimulus	GO:0005506 GO:0009055 GO:0016705 GO:0016711 GO:0019825 GO:0020037	electron carrier activity; flavonoid 3'-monooxygenase activity; heme binding; iron ion binding; oxidoreductase activity, acting on paired donors, with incorporation or reduction of molecular oxygen; oxygen binding	GO:0005576	extracellular region
Glyma.16G010000	AT1G72450	jasmonate-zim-domain protein 6		GO:0009611 GO:0009620 GO:0009694 GO:0009695 GO:0009753 GO:0009867	jasmonic acid biosynthetic process; jasmonic acid mediated signaling pathway; jasmonic acid metabolic process; response to fungus; response to jasmonic acid stimulus; response to wounding	GO:0005515	protein binding	GO:0005634	nucleus
Glyma.16G014100	AT3G14310	pectin methylesterase 3		GO:0006546 GO:0006569 GO:0009624 GO:0009684 GO:0042545	cell wall modification; glycine catabolic process; indoleacetic acid biosynthetic process; response to nematode; tryptophan catabolic process	GO:0004857 GO:0030599	enzyme inhibitor activity; pectinesterase activity	GO:0005618 GO:0005737 GO:0005886 GO:0048046	apoplast; cell wall; cytoplasm; plasma membrane
Glyma.16G017500	AT4G10490	2-oxoglutarate (2OG) and Fe(II)-dependent oxygenase superfamily protein		GO:0019748 GO:0055114	oxidation-reduction process; secondary metabolic process	GO:0016491 GO:0016706	oxidoreductase activity; oxidoreductase activity, acting on paired donors, with incorporation or reduction of molecular oxygen, 2-oxoglutarate as one donor, and incorporation of one atom each of oxygen into both donors	GO:0005737	cytoplasm
Glyma.16G023900	AT1G01260	basic helix-loop-helix (bHLH) DNA-binding superfamily protein	bHLH	GO:0006355 GO:0009694 GO:0009753	jasmonic acid metabolic process; regulation of transcription, DNA-dependent; response to jasmonic acid stimulus	GO:0003677 GO:0003700	DNA binding; sequence-specific DNA binding transcription factor activity	GO:0005634	nucleus
Glyma.16G024000	AT1G01300	Eukaryotic aspartyl protease family protein		GO:0006508 GO:0009664 GO:0042545 GO:0080167	cell wall modification; plant-type cell wall organization; proteolysis; response to karrikin	GO:0004190	aspartic-type endopeptidase activity	GO:0005576 GO:0009505 GO:0016020	extracellular region; membrane; plant-type cell wall
Glyma.16G026400	AT2G46400	WRKY DNA-binding protein 46	WRKY	GO:0006355 GO:0009627 GO:0009697 GO:0010200	regulation of transcription, DNA-dependent; response to chitin; salicylic acid biosynthetic process; systemic acquired resistance	GO:0003700 GO:0043565	sequence-specific DNA binding; sequence-specific DNA binding transcription factor activity	GO:0005634 GO:0005730	nucleolus; nucleus
Glyma.16G032200	AT3G61510	ACC synthase 1		GO:0009058 GO:0009693 GO:0042218	1-aminocyclopropane-1-carboxylate biosynthetic process; biosynthetic process; ethylene biosynthetic process	GO:0003824 GO:0016740 GO:0016847 GO:0030170	1-aminocyclopropane-1-carboxylate synthase activity; catalytic activity; pyridoxal phosphate binding; transferase activity	GO:0005737	cytoplasm
Glyma.16G039800	NA	NA		NA	NA	NA	NA	NA	NA
Glyma.16G045000	AT5G13870	xyloglucan endotransglucosylase/hydrolase 5		GO:0005975 GO:0006073	carbohydrate metabolic process; cellular glucan metabolic process	GO:0004553 GO:0016762 GO:0016798	hydrolase activity, acting on glycosyl bonds; hydrolase activity, hydrolyzing O-glycosyl compounds; xyloglucan:xyloglucosyl transferase activity	GO:0005576 GO:0005618 GO:0048046	apoplast; cell wall; extracellular region
Glyma.16G047600	AT5G61890	Integrase-type DNA-binding superfamily protein	ERF	GO:0006355 GO:0006865 GO:0050832	amino acid transport; defense response to fungus; regulation of transcription, DNA-dependent	GO:0003677 GO:0003700	DNA binding; sequence-specific DNA binding transcription factor activity	GO:0005634	nucleus
Glyma.16G049000	AT3G26740	CCR-like		GO:0008150 GO:0030003 GO:0070838	biological process; cellular cation homeostasis; divalent metal ion transport	GO:0003674	molecular function	GO:0009507	chloroplast
Glyma.16G059400	AT3G01820	P-loop containing nucleoside triphosphate hydrolases superfamily protein		GO:0006139 GO:0006354 GO:0009061 GO:0009117	DNA-dependent transcription, elongation; anaerobic respiration; nucleobase-containing compound metabolic process; nucleotide metabolic process	GO:0005524 GO:0019201 GO:0019205	ATP binding; nucleobase-containing compound kinase activity; nucleotide kinase activity	GO:0005739	mitochondrion
Glyma.16G076400	AT1G31720	Protein of unknown function (DUF1218)		GO:0008150	biological process	GO:0003674	molecular function	GO:0005575	cellular component
Glyma.16G084300	AT3G07390	auxin-responsive family protein		GO:0006007 GO:0009733 GO:0010102 GO:0030198	extracellular matrix organization; glucose catabolic process; lateral root morphogenesis; response to auxin stimulus	GO:0005201	extracellular matrix structural constituent	GO:0005576 GO:0005886 GO:0031225 GO:0046658	anchored to membrane; anchored to plasma membrane; extracellular region; plasma membrane
Glyma.16G093900	AT1G11330	S-locus lectin protein kinase family protein		GO:0006468 GO:0048544	protein phosphorylation; recognition of pollen	GO:0004672 GO:0004674 GO:0004713 GO:0005524 GO:0016301 GO:0016772 GO:0030246	ATP binding; carbohydrate binding; kinase activity; protein kinase activity; protein serine/threonine kinase activity; protein tyrosine kinase activity; transferase activity, transferring phosphorus-containing groups	GO:0005886	plasma membrane
Glyma.16G113000	AT1G76490	hydroxy methylglutaryl CoA reductase 1		GO:0006816 GO:0007030 GO:0007033 GO:0008299 GO:0009611 GO:0009651 GO:0009805 GO:0015936 GO:0016126 GO:0019287 GO:0055114 GO:0060964	Golgi organization; calcium ion transport; coenzyme A metabolic process; coumarin biosynthetic process; isopentenyl diphosphate biosynthetic process, mevalonate pathway; isoprenoid biosynthetic process; oxidation-reduction process; regulation of gene silencing by miRNA; response to salt stress; response to wounding; sterol biosynthetic process; vacuole organization	GO:0004420 GO:0005515 GO:0016616 GO:0042282 GO:0050661 GO:0050662	NADP binding; coenzyme binding; hydroxymethylglutaryl-CoA reductase (NADPH) activity; hydroxymethylglutaryl-CoA reductase activity; oxidoreductase activity, acting on the CH-OH group of donors, NAD or NADP as acceptor; protein binding	GO:0005783 GO:0005789 GO:0016020 GO:0016021	endoplasmic reticulum; endoplasmic reticulum membrane; integral to membrane; membrane
Glyma.16G116200	AT4G35560	Transducin/WD40 repeat-like superfamily protein		GO:0048235	pollen sperm cell differentiation	GO:0003674	molecular function	GO:0005634 GO:0080008	CUL4-RING ubiquitin ligase complex; nucleus
Glyma.16G118000	AT5G14650	Pectin lyase-like superfamily protein		GO:0005975	carbohydrate metabolic process	GO:0004650	polygalacturonase activity	GO:0005576	extracellular region
Glyma.16G122500	AT4G35880	Eukaryotic aspartyl protease family protein		GO:0006508	proteolysis	GO:0004190	aspartic-type endopeptidase activity	GO:0005576 GO:0031225	anchored to membrane; extracellular region
Glyma.16G127700	AT4G36040	Chaperone DnaJ-domain superfamily protein		GO:0006457	protein folding	GO:0031072	heat shock protein binding	GO:0005634 GO:0009507 GO:0009536	chloroplast; nucleus; plastid
Glyma.16G130200	AT2G18060	vascular related NAC-domain protein 1	NAC	GO:0006355 GO:0009741 GO:0010089 GO:0010200	regulation of transcription, DNA-dependent; response to brassinosteroid stimulus; response to chitin; xylem development	GO:0003677 GO:0003700	DNA binding; sequence-specific DNA binding transcription factor activity	GO:0005634	nucleus
Glyma.16G135200	AT5G17680	disease resistance protein (TIR-NBS-LRR class), putative		GO:0006952 GO:0007165	defense response; signal transduction	GO:0043531	ADP binding	GO:0005622	intracellular
Glyma.16G136900	AT5G17680	disease resistance protein (TIR-NBS-LRR class), putative		GO:0006952 GO:0007165	defense response; signal transduction	GO:0043531	ADP binding	GO:0005622	intracellular
Glyma.16G137000	AT5G41750	Disease resistance protein (TIR-NBS-LRR class) family		GO:0006952 GO:0007165	defense response; signal transduction	GO:0000166 GO:0017111 GO:0043531	ADP binding; nucleoside-triphosphatase activity; nucleotide binding	GO:0005622 GO:0005634	intracellular; nucleus
Glyma.16G137200	AT5G17680	disease resistance protein (TIR-NBS-LRR class), putative		GO:0006952 GO:0007165	defense response; signal transduction	GO:0043531	ADP binding	GO:0005622	intracellular
Glyma.16G142100	AT2G23790	Protein of unknown function (DUF607)		GO:0008150	biological process	GO:0003674	molecular function	GO:0009507	chloroplast
Glyma.16G145100	AT2G23620	methyl esterase 1		GO:0009627 GO:0009696 GO:0009817	defense response to fungus, incompatible interaction; salicylic acid metabolic process; systemic acquired resistance	GO:0016788 GO:0080030 GO:0080031 GO:0080032	hydrolase activity, acting on ester bonds; methyl indole-3-acetate esterase activity; methyl jasmonate esterase activity; methyl salicylate esterase activity	GO:0005737	cytoplasm
Glyma.16G145600	AT2G39200	Seven transmembrane MLO family protein		GO:0002679 GO:0006857 GO:0006865 GO:0006952 GO:0008219 GO:0009407 GO:0009817 GO:0010150 GO:0010200 GO:0010583 GO:0015824	amino acid transport; cell death; defense response; defense response to fungus, incompatible interaction; leaf senescence; oligopeptide transport; proline transport; respiratory burst involved in defense response; response to chitin; response to cyclopentenone; toxin catabolic process	GO:0005516	calmodulin binding	GO:0005886 GO:0016021	integral to membrane; plasma membrane
Glyma.16G152900	AT1G54385	ARM repeat superfamily protein		GO:0000245 GO:0000398	mRNA splicing, via spliceosome; spliceosomal complex assembly	NA	NA	GO:0005575	cellular component
Glyma.16G153400	AT5G18170	glutamate dehydrogenase 1		GO:0006520 GO:0006807 GO:0009646 GO:0009651 GO:0046686 GO:0055114	cellular amino acid metabolic process; nitrogen compound metabolic process; oxidation-reduction process; response to absence of light; response to cadmium ion; response to salt stress	GO:0000166 GO:0004353 GO:0005507 GO:0005524 GO:0008270 GO:0016491 GO:0016639 GO:0050897	ATP binding; cobalt ion binding; copper ion binding; glutamate dehydrogenase [NAD(P)+] activity; nucleotide binding; oxidoreductase activity; oxidoreductase activity, acting on the CH-NH2 group of donors, NAD or NADP as acceptor; zinc ion binding	GO:0005739	mitochondrion
Glyma.16G159200	AT5G36930	Disease resistance protein (TIR-NBS-LRR class) family		GO:0006952 GO:0007165	defense response; signal transduction	GO:0043531	ADP binding	GO:0005622 GO:0005737	cytoplasm; intracellular
Glyma.16G159300	AT4G19050	NB-ARC domain-containing disease resistance protein		GO:0006952	defense response	GO:0043531	ADP binding	GO:0005634	nucleus
Glyma.16G161300	AT4G31980	NA		GO:0006865 GO:0008150	amino acid transport; biological process	GO:0003674	molecular function	GO:0005886	plasma membrane
Glyma.16G164200	AT1G71695	Peroxidase superfamily protein		GO:0006979 GO:0010075 GO:0048653 GO:0055114	anther development; oxidation-reduction process; regulation of meristem growth; response to oxidative stress	GO:0004601 GO:0020037	heme binding; peroxidase activity	GO:0005576 GO:0005618 GO:0005773 GO:0009505 GO:0009506 GO:0016020	cell wall; extracellular region; membrane; plant-type cell wall; plasmodesma; vacuole
Glyma.16G164400	AT1G71695	Peroxidase superfamily protein		GO:0006979 GO:0010075 GO:0048653 GO:0055114	anther development; oxidation-reduction process; regulation of meristem growth; response to oxidative stress	GO:0004601 GO:0020037	heme binding; peroxidase activity	GO:0005576 GO:0005618 GO:0005773 GO:0009505 GO:0009506 GO:0016020	cell wall; extracellular region; membrane; plant-type cell wall; plasmodesma; vacuole
Glyma.16G169700	AT2G33060	receptor like protein 27		GO:0006952 GO:0007165	defense response; signal transduction	GO:0016301	kinase activity	GO:0005886	plasma membrane
Glyma.16G172500	AT3G59140	multidrug resistance-associated protein 14		GO:0006810 GO:0055085	transmembrane transport; transport	GO:0000166 GO:0005524 GO:0016887 GO:0017111 GO:0042626	ATP binding; ATPase activity; ATPase activity, coupled to transmembrane movement of substances; nucleoside-triphosphatase activity; nucleotide binding	GO:0005774 GO:0005886 GO:0016021	integral to membrane; plasma membrane; vacuolar membrane
Glyma.16G176600	AT4G13920	receptor like protein 50		GO:0006952 GO:0007165	defense response; signal transduction	GO:0016301	kinase activity	GO:0005886	plasma membrane
Glyma.16G176800	AT2G34930	disease resistance family protein / LRR family protein		GO:0006952 GO:0007165 GO:0050832	defense response; defense response to fungus; signal transduction	NA	NA	GO:0005618	cell wall
Glyma.16G177800	AT5G52780	Protein of unknown function (DUF3464)		GO:0006098 GO:0008150 GO:0010155 GO:0010207 GO:0046777	biological process; pentose-phosphate shunt; photosystem II assembly; protein autophosphorylation; regulation of proton transport	GO:0003674	molecular function	GO:0009507 GO:0009535	chloroplast; chloroplast thylakoid membrane
Glyma.16G178100	AT5G52760	Copper transport protein family		GO:0000165 GO:0002237 GO:0006355 GO:0006612 GO:0009581 GO:0009595 GO:0009617 GO:0009627 GO:0009697 GO:0009814 GO:0009862 GO:0009867 GO:0010200 GO:0010310 GO:0010363 GO:0031348 GO:0035304 GO:0042742 GO:0043069 GO:0043900 GO:0045088 GO:0050832	MAPK cascade; defense response, incompatible interaction; defense response to bacterium; defense response to fungus; detection of biotic stimulus; detection of external stimulus; jasmonic acid mediated signaling pathway; negative regulation of defense response; negative regulation of programmed cell death; protein targeting to membrane; regulation of hydrogen peroxide metabolic process; regulatio…	GO:0046872	metal ion binding	GO:0005634	nucleus
Glyma.16G178200	AT1G01490	Heavy metal transport/detoxification superfamily protein		GO:0030001	metal ion transport	GO:0046872	metal ion binding	GO:0005634	nucleus
Glyma.16G196900	AT5G62070	IQ-domain 23		NA	NA	GO:0005516	calmodulin binding	GO:0005634	nucleus
Glyma.16G197200	AT2G45750	S-adenosyl-L-methionine-dependent methyltransferases superfamily protein		GO:0010054	trichoblast differentiation	GO:0008168	methyltransferase activity	GO:0005794	Golgi apparatus
Glyma.16G203100	AT5G51720	2 iron, 2 sulfur cluster binding		GO:0006098 GO:0010150 GO:0016556 GO:0055072 GO:0072593	iron ion homeostasis; leaf senescence; mRNA modification; pentose-phosphate shunt; reactive oxygen species metabolic process	GO:0051537	2 iron, 2 sulfur cluster binding	GO:0005739 GO:0009507 GO:0009570	chloroplast; chloroplast stroma; mitochondrion
Glyma.16G212500	AT1G17860	Kunitz family trypsin and protease inhibitor protein		GO:0006457 GO:0009408 GO:0009644 GO:0010167 GO:0015706 GO:0034976 GO:0042542	nitrate transport; protein folding; response to endoplasmic reticulum stress; response to heat; response to high light intensity; response to hydrogen peroxide; response to nitrate	GO:0004866	endopeptidase inhibitor activity	GO:0005576 GO:0005618 GO:0048046	apoplast; cell wall; extracellular region
Glyma.17G008000	AT5G47530	Auxin-responsive family protein		GO:0007275 GO:0010413 GO:0045492	glucuronoxylan metabolic process; multicellular organismal development; xylan biosynthetic process	NA	NA	GO:0005886 GO:0016020 GO:0016021	integral to membrane; membrane; plasma membrane
Glyma.17G011400	AT1G62300	WRKY family transcription factor	WRKY	GO:0002679 GO:0006355 GO:0009407 GO:0010200 GO:0010583 GO:0016036 GO:0035556 GO:0043090 GO:0045892 GO:0080169	amino acid import; cellular response to boron-containing substance deprivation; cellular response to phosphate starvation; intracellular signal transduction; negative regulation of transcription, DNA-dependent; regulation of transcription, DNA-dependent; respiratory burst involved in defense response; response to chitin; response to cyclopentenone; toxin catabolic process	GO:0003700 GO:0005515 GO:0043565 GO:0044212	protein binding; sequence-specific DNA binding; sequence-specific DNA binding transcription factor activity; transcription regulatory region DNA binding	GO:0005634	nucleus
Glyma.17G012300	AT4G22010	SKU5 similar 4		GO:0000271 GO:0009825 GO:0009932 GO:0010075 GO:0010817 GO:0016126 GO:0043481 GO:0048653 GO:0048767 GO:0055114 GO:0071555	anther development; anthocyanin accumulation in tissues in response to UV light; cell tip growth; cell wall organization; multidimensional cell growth; oxidation-reduction process; polysaccharide biosynthetic process; regulation of hormone levels; regulation of meristem growth; root hair elongation; sterol biosynthetic process	GO:0005507 GO:0016491	copper ion binding; oxidoreductase activity	GO:0005576 GO:0009505 GO:0009506 GO:0016020	extracellular region; membrane; plant-type cell wall; plasmodesma
Glyma.17G021400	AT5G18860	inosine-uridine preferring nucleoside hydrolase family protein		GO:0006148 GO:0006154 GO:0009611 GO:0009753	adenosine catabolic process; inosine catabolic process; response to jasmonic acid stimulus; response to wounding	GO:0016787 GO:0047622 GO:0047724	adenosine nucleosidase activity; hydrolase activity; inosine nucleosidase activity	GO:0005618 GO:0048046	apoplast; cell wall
Glyma.17G023900	AT5G18600	Thioredoxin superfamily protein		GO:0019243 GO:0045454	cell redox homeostasis; methylglyoxal catabolic process to D-lactate	GO:0008794 GO:0009055 GO:0015035	arsenate reductase (glutaredoxin) activity; electron carrier activity; protein disulfide oxidoreductase activity	GO:0005575	cellular component
Glyma.17G030400	AT1G24020	MLP-like protein 423		GO:0006952 GO:0016556	defense response; mRNA modification	NA	NA	GO:0009507 GO:0016020	chloroplast; membrane
Glyma.17G030800	NA	NA		NA	NA	NA	NA	NA	NA
Glyma.17G034900	AT5G49480	Ca2+-binding protein 1		GO:0042538	hyperosmotic salinity response	GO:0005509	calcium ion binding	GO:0005737 GO:0005829	cytoplasm; cytosol
Glyma.17G038800	AT5G09410	ethylene induced calmodulin binding protein	CAMTA	GO:0006355 GO:0009409 GO:0045893 GO:0050826	positive regulation of transcription, DNA-dependent; regulation of transcription, DNA-dependent; response to cold; response to freezing	GO:0003677 GO:0005516	DNA binding; calmodulin binding	GO:0005634	nucleus
Glyma.17G040300	AT3G17430	Nucleotide-sugar transporter family protein		GO:0006863	purine nucleobase transport	GO:0008514	organic anion transmembrane transporter activity	GO:0005794 GO:0005886	Golgi apparatus; plasma membrane
Glyma.17G043700	AT5G20900	jasmonate-zim-domain protein 12		GO:0006612 GO:0008150 GO:0009611 GO:0009867 GO:0009963 GO:0010363	biological process; jasmonic acid mediated signaling pathway; positive regulation of flavonoid biosynthetic process; protein targeting to membrane; regulation of plant-type hypersensitive response; response to wounding	GO:0005515	protein binding	GO:0005634	nucleus
Glyma.17G047700	AT1G19180	jasmonate-zim-domain protein 1		GO:0000165 GO:0006612 GO:0007154 GO:0007165 GO:0009409 GO:0009414 GO:0009555 GO:0009611 GO:0009620 GO:0009695 GO:0009723 GO:0009733 GO:0009738 GO:0009753 GO:0009862 GO:0009863 GO:0009867 GO:0009908 GO:0010200 GO:0010363 GO:0030968 GO:0031348 GO:0035556 GO:0042538 GO:0042742 GO:0043069 GO:0050832	MAPK cascade; abscisic acid mediated signaling pathway; cell communication; defense response to bacterium; defense response to fungus; endoplasmic reticulum unfolded protein response; flower development; hyperosmotic salinity response; intracellular signal transduction; jasmonic acid biosynthetic process; jasmonic acid mediated signaling pathway; negative regulation of defense response; negative …	GO:0005515	protein binding	GO:0005634	nucleus
Glyma.17G049700	AT5G35570	O-fucosyltransferase family protein		GO:0008150	biological process	GO:0016757	transferase activity, transferring glycosyl groups	GO:0005794 GO:0009507	Golgi apparatus; chloroplast
Glyma.17G053600	AT4G33050	calmodulin-binding family protein		GO:0000165 GO:0002237 GO:0002679 GO:0006569 GO:0006612 GO:0006944 GO:0009581 GO:0009595 GO:0009625 GO:0009627 GO:0009646 GO:0009684 GO:0009697 GO:0009862 GO:0009863 GO:0009867 GO:0010119 GO:0010197 GO:0010200 GO:0010310 GO:0010363 GO:0030968 GO:0031347 GO:0031348 GO:0035556 GO:0042742 GO:0043069 GO:0043900 GO:0045087 GO:0050832	MAPK cascade; cellular membrane fusion; defense response to bacterium; defense response to fungus; detection of biotic stimulus; detection of external stimulus; endoplasmic reticulum unfolded protein response; indoleacetic acid biosynthetic process; innate immune response; intracellular signal transduction; jasmonic acid mediated signaling pathway; negative regulation of defense response; negativ…	GO:0005516	calmodulin binding	GO:0005634 GO:0005737	cytoplasm; nucleus
Glyma.17G058600	AT5G57150	basic helix-loop-helix (bHLH) DNA-binding superfamily protein	bHLH	GO:0006355 GO:0009694 GO:0009753	jasmonic acid metabolic process; regulation of transcription, DNA-dependent; response to jasmonic acid stimulus	GO:0003677 GO:0003700	DNA binding; sequence-specific DNA binding transcription factor activity	GO:0005634	nucleus
Glyma.17G065000	AT3G23730	xyloglucan endotransglucosylase/hydrolase 16		GO:0005975 GO:0006073	carbohydrate metabolic process; cellular glucan metabolic process	GO:0004553 GO:0016762 GO:0016798	hydrolase activity, acting on glycosyl bonds; hydrolase activity, hydrolyzing O-glycosyl compounds; xyloglucan:xyloglucosyl transferase activity	GO:0005576 GO:0005618 GO:0048046	apoplast; cell wall; extracellular region
Glyma.17G065100	AT4G25810	xyloglucan endotransglycosylase 6		GO:0005975 GO:0006073	carbohydrate metabolic process; cellular glucan metabolic process	GO:0004553 GO:0016762 GO:0016798	hydrolase activity, acting on glycosyl bonds; hydrolase activity, hydrolyzing O-glycosyl compounds; xyloglucan:xyloglucosyl transferase activity	GO:0005576 GO:0005618 GO:0005794 GO:0048046	Golgi apparatus; apoplast; cell wall; extracellular region
Glyma.17G065200	AT4G25810	xyloglucan endotransglycosylase 6		GO:0005975 GO:0006073	carbohydrate metabolic process; cellular glucan metabolic process	GO:0004553 GO:0016762 GO:0016798	hydrolase activity, acting on glycosyl bonds; hydrolase activity, hydrolyzing O-glycosyl compounds; xyloglucan:xyloglucosyl transferase activity	GO:0005576 GO:0005618 GO:0005794 GO:0048046	Golgi apparatus; apoplast; cell wall; extracellular region
Glyma.17G066500	AT4G15560	Deoxyxylulose-5-phosphate synthase		GO:0000096 GO:0006546 GO:0006636 GO:0006655 GO:0006733 GO:0006766 GO:0008152 GO:0008652 GO:0009072 GO:0009073 GO:0009106 GO:0009108 GO:0009117 GO:0009416 GO:0009695 GO:0009965 GO:0010155 GO:0015994 GO:0015995 GO:0016114 GO:0016117 GO:0019216 GO:0019288 GO:0019344 GO:0019748 GO:0030154 GO:0031408 GO:0032880 GO:0044272 GO:0045893 GO:0046777	aromatic amino acid family biosynthetic process; aromatic amino acid family metabolic process; carotenoid biosynthetic process; cell differentiation; cellular amino acid biosynthetic process; chlorophyll biosynthetic process; chlorophyll metabolic process; coenzyme biosynthetic process; cysteine biosynthetic process; glycine catabolic process; isopentenyl diphosphate biosynthetic process, mevalon…	GO:0003824 GO:0008661 GO:0016624	1-deoxy-D-xylulose-5-phosphate synthase activity; catalytic activity; oxidoreductase activity, acting on the aldehyde or oxo group of donors, disulfide as acceptor	GO:0009507	chloroplast
Glyma.17G079000	AT3G29575	ABI five binding protein 3		GO:0008150 GO:0009738 GO:0045893	abscisic acid mediated signaling pathway; biological process; positive regulation of transcription, DNA-dependent	GO:0005515	protein binding	GO:0005634	nucleus
Glyma.17G081300	AT5G17390	Adenine nucleotide alpha hydrolases-like superfamily protein		NA	NA	GO:0003674	molecular function	NA	NA
Glyma.17G089500	AT5G62770	Protein of unknown function (DUF1645)		GO:0008150	biological process	GO:0003674	molecular function	GO:0005634	nucleus
Glyma.17G090200	AT3G47990	SUGAR-INSENSITIVE 3		GO:0009644 GO:0010182 GO:0010413 GO:0016567 GO:0042542 GO:0045492	glucuronoxylan metabolic process; protein ubiquitination; response to high light intensity; response to hydrogen peroxide; sugar mediated signaling pathway; xylan biosynthetic process	GO:0004842 GO:0008270	ubiquitin-protein ligase activity; zinc ion binding	NA	NA
Glyma.17G092800	AT5G14920	Gibberellin-regulated family protein		GO:0009651 GO:0009737 GO:0009739 GO:2000377	regulation of reactive oxygen species metabolic process; response to abscisic acid stimulus; response to gibberellin stimulus; response to salt stress	GO:0005515	protein binding	GO:0005886	plasma membrane
Glyma.17G094600	NA	NA		NA	NA	NA	NA	NA	NA
Glyma.17G105400	NA	NA		NA	NA	NA	NA	NA	NA
Glyma.17G106500	AT5G11090	serine-rich protein-related		GO:0008150	biological process	GO:0003674	molecular function	GO:0005634	nucleus
Glyma.17G111900	NA	NA		NA	NA	NA	NA	NA	NA
Glyma.17G116500	AT1G15410	aspartate-glutamate racemase family		GO:0006520 GO:0008152	cellular amino acid metabolic process; metabolic process	GO:0016855	racemase and epimerase activity, acting on amino acids and derivatives	GO:0009507	chloroplast
Glyma.17G119800	AT2G26730	Leucine-rich repeat protein kinase family protein		GO:0000272 GO:0005982 GO:0006084 GO:0006468 GO:0007020 GO:0007169 GO:0007389 GO:0008361 GO:0009664 GO:0009832 GO:0009926 GO:0010015 GO:0010075 GO:0016126 GO:0016132 GO:0040007	acetyl-CoA metabolic process; auxin polar transport; brassinosteroid biosynthetic process; growth; microtubule nucleation; pattern specification process; plant-type cell wall biogenesis; plant-type cell wall organization; polysaccharide catabolic process; protein phosphorylation; regulation of cell size; regulation of meristem growth; root morphogenesis; starch metabolic process; sterol biosynthe…	GO:0004672 GO:0004674 GO:0004713 GO:0005524 GO:0016772	ATP binding; protein kinase activity; protein serine/threonine kinase activity; protein tyrosine kinase activity; transferase activity, transferring phosphorus-containing groups	GO:0005886	plasma membrane
Glyma.17G123800	AT1G68710	ATPase E1-E2 type family protein / haloacid dehalogenase-like hydrolase family protein		GO:0006812 GO:0008152 GO:0015914	cation transport; metabolic process; phospholipid transport	GO:0000166 GO:0000287 GO:0003824 GO:0004012 GO:0005524 GO:0015662 GO:0016820 GO:0046872	ATP binding; ATPase activity, coupled to transmembrane movement of ions, phosphorylative mechanism; catalytic activity; hydrolase activity, acting on acid anhydrides, catalyzing transmembrane movement of substances; magnesium ion binding; metal ion binding; nucleotide binding; phospholipid-translocating ATPase activity	GO:0016020 GO:0016021	integral to membrane; membrane
Glyma.17G131900	AT4G25470	C-repeat/DRE binding factor 2	ERF	GO:0006355 GO:0009409 GO:0009631	cold acclimation; regulation of transcription, DNA-dependent; response to cold	GO:0003677 GO:0003700	DNA binding; sequence-specific DNA binding transcription factor activity	GO:0005634	nucleus
Glyma.17G140300	AT2G45180	Bifunctional inhibitor/lipid-transfer protein/seed storage 2S albumin superfamily protein		GO:0000038 GO:0006869 GO:0042335	cuticle development; lipid transport; very long-chain fatty acid metabolic process	GO:0008289	lipid binding	GO:0005576 GO:0009535	chloroplast thylakoid membrane; extracellular region
Glyma.17G156100	AT4G37850	basic helix-loop-helix (bHLH) DNA-binding superfamily protein	bHLH	GO:0006355	regulation of transcription, DNA-dependent	GO:0003677 GO:0003700	DNA binding; sequence-specific DNA binding transcription factor activity	GO:0005634	nucleus
Glyma.17G159600	AT2G22880	VQ motif-containing protein		GO:0010224	response to UV-B	GO:0003674	molecular function	GO:0005634	nucleus
Glyma.17G160200	AT5G67600	NA		GO:0009554	megasporogenesis	NA	NA	GO:0005886	plasma membrane
Glyma.17G165200	AT2G23150	natural resistance-associated macrophage protein 3		GO:0006810 GO:0006828 GO:0006875 GO:0009617 GO:0010043 GO:0015691 GO:0015692 GO:0030001 GO:0042742 GO:0055072 GO:2000379	cadmium ion transport; cellular metal ion homeostasis; defense response to bacterium; iron ion homeostasis; lead ion transport; manganese ion transport; metal ion transport; positive regulation of reactive oxygen species metabolic process; response to bacterium; response to zinc ion; transport	GO:0005215 GO:0005384 GO:0015103 GO:0046873	inorganic anion transmembrane transporter activity; manganese ion transmembrane transporter activity; metal ion transmembrane transporter activity; transporter activity	GO:0005737 GO:0005773 GO:0005774 GO:0005794 GO:0009506 GO:0016020	Golgi apparatus; cytoplasm; membrane; plasmodesma; vacuolar membrane; vacuole
Glyma.17G166600	AT2G23270	NA		GO:0009723 GO:0071456	cellular response to hypoxia; response to ethylene stimulus	GO:0003674	molecular function	GO:0005576	extracellular region
Glyma.17G168900	AT2G23320	WRKY DNA-binding protein 15	WRKY	GO:0002679 GO:0006355 GO:0009693 GO:0010200 GO:0035556	ethylene biosynthetic process; intracellular signal transduction; regulation of transcription, DNA-dependent; respiratory burst involved in defense response; response to chitin	GO:0003700 GO:0005516 GO:0043565	calmodulin binding; sequence-specific DNA binding; sequence-specific DNA binding transcription factor activity	GO:0005634	nucleus
Glyma.17G185000	AT5G13180	NAC domain containing protein 83	NAC	GO:0006355 GO:0006612 GO:0007275 GO:0009651 GO:0009737 GO:0009741 GO:0009963 GO:0010089 GO:0010150 GO:0010363 GO:0045892	leaf senescence; multicellular organismal development; negative regulation of transcription, DNA-dependent; positive regulation of flavonoid biosynthetic process; protein targeting to membrane; regulation of plant-type hypersensitive response; regulation of transcription, DNA-dependent; response to abscisic acid stimulus; response to brassinosteroid stimulus; response to salt stress; xylem develo…	GO:0003677 GO:0003700 GO:0005515	DNA binding; protein binding; sequence-specific DNA binding transcription factor activity	GO:0005634	nucleus
Glyma.17G197500	AT4G31550	WRKY DNA-binding protein 11	WRKY	GO:0002679 GO:0006355 GO:0010200 GO:0035556 GO:0042742	defense response to bacterium; intracellular signal transduction; regulation of transcription, DNA-dependent; respiratory burst involved in defense response; response to chitin	GO:0003700 GO:0005516 GO:0043565	calmodulin binding; sequence-specific DNA binding; sequence-specific DNA binding transcription factor activity	GO:0005634	nucleus
Glyma.17G211300	AT3G11760	NA		GO:0008150	biological process	GO:0003674	molecular function	GO:0005634	nucleus
Glyma.17G214100	AT5G38260	Protein kinase superfamily protein		GO:0006468	protein phosphorylation	GO:0004672 GO:0004674 GO:0005524 GO:0016301 GO:0016772	ATP binding; kinase activity; protein kinase activity; protein serine/threonine kinase activity; transferase activity, transferring phosphorus-containing groups	GO:0005886	plasma membrane
Glyma.17G214400	AT5G38260	Protein kinase superfamily protein		GO:0006468	protein phosphorylation	GO:0004672 GO:0004674 GO:0005524 GO:0016301 GO:0016772	ATP binding; kinase activity; protein kinase activity; protein serine/threonine kinase activity; transferase activity, transferring phosphorus-containing groups	GO:0005886	plasma membrane
Glyma.17G222300	AT1G80840	WRKY DNA-binding protein 40	WRKY	GO:0000165 GO:0002237 GO:0002679 GO:0006355 GO:0006612 GO:0006944 GO:0009595 GO:0009611 GO:0009612 GO:0009620 GO:0009646 GO:0009695 GO:0009697 GO:0009723 GO:0009738 GO:0009751 GO:0009753 GO:0009862 GO:0009863 GO:0009867 GO:0009873 GO:0010200 GO:0010310 GO:0010363 GO:0016045 GO:0030968 GO:0031347 GO:0031348 GO:0035556 GO:0042742 GO:0043069 GO:0043900 GO:0050691 GO:0050776 GO:0050832	MAPK cascade; abscisic acid mediated signaling pathway; cellular membrane fusion; defense response to bacterium; defense response to fungus; detection of bacterium; detection of biotic stimulus; endoplasmic reticulum unfolded protein response; ethylene mediated signaling pathway; intracellular signal transduction; jasmonic acid biosynthetic process; jasmonic acid mediated signaling pathway; negat…	GO:0003700 GO:0005515 GO:0043565	protein binding; sequence-specific DNA binding; sequence-specific DNA binding transcription factor activity	GO:0005634	nucleus
Glyma.17G222500	AT1G80840	WRKY DNA-binding protein 40	WRKY	GO:0000165 GO:0002237 GO:0002679 GO:0006355 GO:0006612 GO:0006944 GO:0009595 GO:0009611 GO:0009612 GO:0009620 GO:0009646 GO:0009695 GO:0009697 GO:0009723 GO:0009738 GO:0009751 GO:0009753 GO:0009862 GO:0009863 GO:0009867 GO:0009873 GO:0010200 GO:0010310 GO:0010363 GO:0016045 GO:0030968 GO:0031347 GO:0031348 GO:0035556 GO:0042742 GO:0043069 GO:0043900 GO:0050691 GO:0050776 GO:0050832	MAPK cascade; abscisic acid mediated signaling pathway; cellular membrane fusion; defense response to bacterium; defense response to fungus; detection of bacterium; detection of biotic stimulus; endoplasmic reticulum unfolded protein response; ethylene mediated signaling pathway; intracellular signal transduction; jasmonic acid biosynthetic process; jasmonic acid mediated signaling pathway; negat…	GO:0003700 GO:0005515 GO:0043565	protein binding; sequence-specific DNA binding; sequence-specific DNA binding transcription factor activity	GO:0005634	nucleus
Glyma.17G224800	AT5G26170	WRKY DNA-binding protein 50	WRKY	GO:0006355 GO:0009867 GO:0050832	defense response to fungus; jasmonic acid mediated signaling pathway; regulation of transcription, DNA-dependent	GO:0003700 GO:0043565	sequence-specific DNA binding; sequence-specific DNA binding transcription factor activity	GO:0005634	nucleus
Glyma.17G226600	AT2G26310	Chalcone-flavanone isomerase family protein		GO:0042398	cellular modified amino acid biosynthetic process	GO:0005504	fatty acid binding	GO:0009570	chloroplast stroma
Glyma.17G230700	AT4G32940	gamma vacuolar processing enzyme		GO:0006508 GO:0006624 GO:0006944 GO:0048193	Golgi vesicle transport; cellular membrane fusion; proteolysis; vacuolar protein processing	GO:0004197	cysteine-type endopeptidase activity	GO:0000323 GO:0005576	extracellular region; lytic vacuole
Glyma.17G233500	AT3G49780	phytosulfokine 4 precursor		GO:0008283 GO:0009887 GO:0030154	cell differentiation; cell proliferation; organ morphogenesis	GO:0008083	growth factor activity	GO:0005576 GO:0005794 GO:0031012	Golgi apparatus; extracellular matrix; extracellular region
Glyma.17G236700	AT4G24230	acyl-CoA-binding domain 3		GO:0006952 GO:0009617 GO:0009646 GO:0015908 GO:0042742 GO:0050832	defense response; defense response to bacterium; defense response to fungus; fatty acid transport; response to absence of light; response to bacterium	GO:0000062	fatty-acyl-CoA binding	GO:0005576 GO:0005615	extracellular region; extracellular space
Glyma.17G243100	AT1G47380	Protein phosphatase 2C family protein		NA	NA	GO:0003824 GO:0004722	catalytic activity; protein serine/threonine phosphatase activity	GO:0005739 GO:0005829	cytosol; mitochondrion
Glyma.17G244900	AT3G63470	serine carboxypeptidase-like 40		GO:0006508	proteolysis	GO:0004185	serine-type carboxypeptidase activity	GO:0005576	extracellular region
Glyma.17G245200	AT4G37260	myb domain protein 73	MYB	GO:0006355 GO:0009723 GO:0009737 GO:0009751 GO:0009753 GO:0010200 GO:0046686	regulation of transcription, DNA-dependent; response to abscisic acid stimulus; response to cadmium ion; response to chitin; response to ethylene stimulus; response to jasmonic acid stimulus; response to salicylic acid stimulus	GO:0003677 GO:0003700	DNA binding; sequence-specific DNA binding transcription factor activity	GO:0005634	nucleus
Glyma.17G245300	AT5G66850	mitogen-activated protein kinase kinase kinase 5		GO:0006468 GO:0046777	protein autophosphorylation; protein phosphorylation	GO:0004672 GO:0004674 GO:0005524 GO:0016301 GO:0016772	ATP binding; kinase activity; protein kinase activity; protein serine/threonine kinase activity; transferase activity, transferring phosphorus-containing groups	GO:0005886	plasma membrane
Glyma.17G251800	AT1G19530	NA		GO:0006499 GO:0009061	N-terminal protein myristoylation; anaerobic respiration	GO:0003674	molecular function	GO:0005634	nucleus
Glyma.17G256500	AT1G19850	Transcriptional factor B3 family protein / auxin-responsive factor AUX/IAA-related	ARF	GO:0006346 GO:0006355 GO:0007155 GO:0009725 GO:0009733 GO:0009741 GO:0009790 GO:0009855 GO:0009886 GO:0009887 GO:0009908 GO:0009909 GO:0009942 GO:0009944 GO:0009965 GO:0010014 GO:0010051 GO:0010073 GO:0010090 GO:0010305 GO:0016246 GO:0031048 GO:0045010 GO:0048364 GO:0048439 GO:0048481 GO:0048507 GO:0048519 GO:0048527 GO:0048765 GO:0051567 GO:0071555	RNA interference; actin nucleation; cell adhesion; cell wall organization; chromatin silencing by small RNA; determination of bilateral symmetry; embryo development; flower development; flower morphogenesis; histone H3-K9 methylation; lateral root development; leaf morphogenesis; leaf vascular tissue pattern formation; longitudinal axis specification; meristem development; meristem initiation; me…	GO:0003700 GO:0005515 GO:0042802 GO:0044212	identical protein binding; protein binding; sequence-specific DNA binding transcription factor activity; transcription regulatory region DNA binding	GO:0005634 GO:0016020	membrane; nucleus
Glyma.18G003200	AT3G23730	xyloglucan endotransglucosylase/hydrolase 16		GO:0005975 GO:0006073	carbohydrate metabolic process; cellular glucan metabolic process	GO:0004553 GO:0016762 GO:0016798	hydrolase activity, acting on glycosyl bonds; hydrolase activity, hydrolyzing O-glycosyl compounds; xyloglucan:xyloglucosyl transferase activity	GO:0005576 GO:0005618 GO:0048046	apoplast; cell wall; extracellular region
Glyma.18G023100	AT5G34930	arogenate dehydrogenase		GO:0006567 GO:0006571 GO:0055114	oxidation-reduction process; threonine catabolic process; tyrosine biosynthetic process	GO:0000166 GO:0004665 GO:0008977	nucleotide binding; prephenate dehydrogenase (NADP+) activity; prephenate dehydrogenase activity	GO:0005739	mitochondrion
Glyma.18G027300	AT2G40116	Phosphoinositide-specific phospholipase C family protein		GO:0006629 GO:0007165 GO:0035556	intracellular signal transduction; lipid metabolic process; signal transduction	GO:0004435 GO:0004629 GO:0008081	phosphatidylinositol phospholipase C activity; phospholipase C activity; phosphoric diester hydrolase activity	GO:0005634	nucleus
Glyma.18G027600	AT3G55490	GINS complex protein		NA	NA	NA	NA	GO:0005634	nucleus
Glyma.18G031100	AT3G11320	Nucleotide-sugar transporter family protein		GO:0006863 GO:0016132	brassinosteroid biosynthetic process; purine nucleobase transport	GO:0008514	organic anion transmembrane transporter activity	GO:0005783 GO:0005794 GO:0005886 GO:0016020	Golgi apparatus; endoplasmic reticulum; membrane; plasma membrane
Glyma.18G040500	AT5G37710	alpha/beta-Hydrolases superfamily protein		GO:0006629 GO:0016042	lipid catabolic process; lipid metabolic process	GO:0004091 GO:0004806 GO:0005516	calmodulin binding; carboxylesterase activity; triglyceride lipase activity	GO:0005886	plasma membrane
Glyma.18G052500	AT2G40620	Basic-leucine zipper (bZIP) transcription factor family protein	bZIP	GO:0006355	regulation of transcription, DNA-dependent	GO:0003677 GO:0003700 GO:0043565 GO:0046983	DNA binding; protein dimerization activity; sequence-specific DNA binding; sequence-specific DNA binding transcription factor activity	GO:0005634	nucleus
Glyma.18G060300	AT2G30080	ZIP metal ion transporter family		GO:0006812 GO:0009624 GO:0030001 GO:0055085 GO:0071577	cation transport; metal ion transport; response to nematode; transmembrane transport; zinc ion transmembrane transport	GO:0005385 GO:0008324 GO:0046873	cation transmembrane transporter activity; metal ion transmembrane transporter activity; zinc ion transmembrane transporter activity	GO:0005886 GO:0016020 GO:0016021	integral to membrane; membrane; plasma membrane
Glyma.18G067500	AT4G37300	maternal effect embryo arrest 59		GO:0009793	embryo development ending in seed dormancy	GO:0003674	molecular function	GO:0005634	nucleus
Glyma.18G078200	AT3G13130	NA		GO:0008150	biological process	GO:0003674	molecular function	GO:0009507	chloroplast
Glyma.18G096500	AT3G20410	calmodulin-domain protein kinase 9		GO:0000165 GO:0006468 GO:0006499 GO:0006612 GO:0007154 GO:0007165 GO:0009409 GO:0009723 GO:0009738 GO:0009862 GO:0009867 GO:0010363 GO:0030968 GO:0031348 GO:0043069 GO:0050832	MAPK cascade; N-terminal protein myristoylation; abscisic acid mediated signaling pathway; cell communication; defense response to fungus; endoplasmic reticulum unfolded protein response; jasmonic acid mediated signaling pathway; negative regulation of defense response; negative regulation of programmed cell death; protein phosphorylation; protein targeting to membrane; regulation of plant-type h…	GO:0004672 GO:0004674 GO:0004683 GO:0005509 GO:0005524 GO:0016301 GO:0016772	ATP binding; calcium ion binding; calmodulin-dependent protein kinase activity; kinase activity; protein kinase activity; protein serine/threonine kinase activity; transferase activity, transferring phosphorus-containing groups	GO:0005634 GO:0005886	nucleus; plasma membrane
Glyma.18G102400	AT5G54840	Ras-related small GTP-binding family protein		GO:0007264 GO:0016192	small GTPase mediated signal transduction; vesicle-mediated transport	GO:0005525	GTP binding	GO:0005622 GO:0005634	intracellular; nucleus
Glyma.18G110200	AT3G59080	Eukaryotic aspartyl protease family protein		GO:0006508 GO:0010200 GO:0050832	defense response to fungus; proteolysis; response to chitin	GO:0003677 GO:0004190	DNA binding; aspartic-type endopeptidase activity	GO:0005576	extracellular region
Glyma.18G116300	AT2G43020	polyamine oxidase 2		GO:0006598 GO:0009409 GO:0009414 GO:0009737 GO:0055114	oxidation-reduction process; polyamine catabolic process; response to abscisic acid stimulus; response to cold; response to water deprivation	GO:0008131 GO:0046592	polyamine oxidase activity; primary amine oxidase activity	NA	NA
Glyma.18G127900	AT4G16990	disease resistance protein (TIR-NBS class), putative		GO:0006952 GO:0007165 GO:0009817 GO:0015979 GO:2000071	defense response; defense response to fungus, incompatible interaction; photosynthesis; regulation of defense response by callose deposition; signal transduction	GO:0043531	ADP binding	GO:0005622 GO:0005634 GO:0005737	cytoplasm; intracellular; nucleus
Glyma.18G141500	AT1G70520	cysteine-rich RLK (RECEPTOR-like protein kinase) 2		GO:0006457 GO:0006468 GO:0006857 GO:0009408 GO:0009644 GO:0010193 GO:0034976 GO:0042542 GO:0046777	oligopeptide transport; protein autophosphorylation; protein folding; protein phosphorylation; response to endoplasmic reticulum stress; response to heat; response to high light intensity; response to hydrogen peroxide; response to ozone	GO:0004672 GO:0004674 GO:0005524 GO:0016301 GO:0016772	ATP binding; kinase activity; protein kinase activity; protein serine/threonine kinase activity; transferase activity, transferring phosphorus-containing groups	GO:0005576 GO:0005886 GO:0009506	extracellular region; plasma membrane; plasmodesma
Glyma.18G179800	AT3G09410	Pectinacetylesterase family protein		GO:0008150	biological process	GO:0004091	carboxylesterase activity	GO:0005576	extracellular region
Glyma.18G185400	AT2G37710	receptor lectin kinase		GO:0000165 GO:0006355 GO:0006468 GO:0006612 GO:0006995 GO:0009617 GO:0009627 GO:0009697 GO:0009751 GO:0009862 GO:0009867 GO:0010310 GO:0010363 GO:0031347 GO:0031348 GO:0035304 GO:0042742 GO:0043069 GO:0045088 GO:0050832	MAPK cascade; cellular response to nitrogen starvation; defense response to bacterium; defense response to fungus; jasmonic acid mediated signaling pathway; negative regulation of defense response; negative regulation of programmed cell death; protein phosphorylation; protein targeting to membrane; regulation of defense response; regulation of hydrogen peroxide metabolic process; regulation of in…	GO:0004672 GO:0004674 GO:0005524 GO:0016301 GO:0016772	ATP binding; kinase activity; protein kinase activity; protein serine/threonine kinase activity; transferase activity, transferring phosphorus-containing groups	GO:0005886	plasma membrane
Glyma.18G186800	AT5G06060	NAD(P)-binding Rossmann-fold superfamily protein		GO:0008152	metabolic process	GO:0000166 GO:0016491	nucleotide binding; oxidoreductase activity	GO:0005829	cytosol
Glyma.18G191600	AT5G55410	Bifunctional inhibitor/lipid-transfer protein/seed storage 2S albumin superfamily protein		GO:0006869	lipid transport	GO:0008289	lipid binding	GO:0005576	extracellular region
Glyma.18G192800	AT3G54020	Arabidopsis Inositol phosphorylceramide synthase 1		GO:0030148	sphingolipid biosynthetic process	GO:0045140	inositol phosphoceramide synthase activity	GO:0005886	plasma membrane
Glyma.18G195200	AT1G74170	receptor like protein 13		GO:0007165	signal transduction	NA	NA	NA	NA
Glyma.18G198000	AT4G08850	Leucine-rich repeat receptor-like protein kinase family protein		GO:0006468 GO:0006857 GO:0006995 GO:0009627 GO:0031347	cellular response to nitrogen starvation; oligopeptide transport; protein phosphorylation; regulation of defense response; systemic acquired resistance	GO:0004672 GO:0004713 GO:0005524 GO:0016301 GO:0016772	ATP binding; kinase activity; protein kinase activity; protein tyrosine kinase activity; transferase activity, transferring phosphorus-containing groups	GO:0005634 GO:0005886 GO:0009506 GO:0016020	membrane; nucleus; plasma membrane; plasmodesma
Glyma.18G202600	AT5G05580	fatty acid desaturase 8		GO:0006629 GO:0006633 GO:0009266 GO:0055114	fatty acid biosynthetic process; lipid metabolic process; oxidation-reduction process; response to temperature stimulus	GO:0016717 GO:0042389	omega-3 fatty acid desaturase activity; oxidoreductase activity, acting on paired donors, with oxidation of a pair of donors resulting in the reduction of molecular oxygen to two molecules of water	GO:0009507 GO:0009941	chloroplast; chloroplast envelope
Glyma.18G204800	AT2G38290	ammonium transporter 2		GO:0000165 GO:0002237 GO:0006612 GO:0006820 GO:0006862 GO:0006888 GO:0006944 GO:0006995 GO:0007154 GO:0009409 GO:0009581 GO:0009595 GO:0009624 GO:0009627 GO:0009697 GO:0009738 GO:0009744 GO:0009749 GO:0009750 GO:0009862 GO:0009863 GO:0009867 GO:0010200 GO:0010310 GO:0010363 GO:0015695 GO:0015696 GO:0015802 GO:0030968 GO:0031347 GO:0031348 GO:0042742 GO:0043069 GO:0043090 GO:0043269 GO:0043900 GO:…	ER to Golgi vesicle-mediated transport; MAPK cascade; abscisic acid mediated signaling pathway; amino acid import; ammonium transport; anion transport; basic amino acid transport; cell communication; cellular membrane fusion; cellular response to nitrogen starvation; defense response to bacterium; defense response to fungus; detection of biotic stimulus; detection of external stimulus; endoplasmi…	GO:0008519 GO:0015398	ammonium transmembrane transporter activity; high affinity secondary active ammonium transmembrane transporter activity	GO:0005737 GO:0005886 GO:0009506	cytoplasm; plasma membrane; plasmodesma
Glyma.18G208800	AT2G38470	WRKY DNA-binding protein 33	WRKY	GO:0000165 GO:0002679 GO:0006355 GO:0006612 GO:0006944 GO:0006970 GO:0009408 GO:0009409 GO:0009414 GO:0009595 GO:0009651 GO:0009697 GO:0009862 GO:0009863 GO:0009867 GO:0010120 GO:0010200 GO:0010310 GO:0010363 GO:0010508 GO:0031348 GO:0034605 GO:0035556 GO:0042742 GO:0043069 GO:0043900 GO:0050832 GO:0070370	MAPK cascade; camalexin biosynthetic process; cellular heat acclimation; cellular membrane fusion; cellular response to heat; defense response to bacterium; defense response to fungus; detection of biotic stimulus; intracellular signal transduction; jasmonic acid mediated signaling pathway; negative regulation of defense response; negative regulation of programmed cell death; positive regulation …	GO:0003700 GO:0005515	protein binding; sequence-specific DNA binding transcription factor activity	GO:0005634	nucleus
Glyma.18G209800	AT5G01750	Protein of unknown function (DUF567)		GO:0006569 GO:0006995 GO:0008150 GO:0009684 GO:0030003 GO:0070838	biological process; cellular cation homeostasis; cellular response to nitrogen starvation; divalent metal ion transport; indoleacetic acid biosynthetic process; tryptophan catabolic process	GO:0003674	molecular function	GO:0009507	chloroplast
Glyma.18G211000	AT5G05340	Peroxidase superfamily protein		GO:0006979 GO:0055114	oxidation-reduction process; response to oxidative stress	GO:0004601 GO:0005515 GO:0020037	heme binding; peroxidase activity; protein binding	GO:0005576 GO:0005618 GO:0005794 GO:0005829 GO:0048046	Golgi apparatus; apoplast; cell wall; cytosol; extracellular region
Glyma.18G214000	AT3G08760	Protein kinase superfamily protein		GO:0006468 GO:0006914	autophagy; protein phosphorylation	GO:0004672 GO:0005524 GO:0016301 GO:0016772	ATP binding; kinase activity; protein kinase activity; transferase activity, transferring phosphorus-containing groups	GO:0005886	plasma membrane
Glyma.18G219600	AT4G05200	cysteine-rich RLK (RECEPTOR-like protein kinase) 25		GO:0000041 GO:0006468 GO:0006826 GO:0010106 GO:0010167 GO:0010413 GO:0015706 GO:0045492	cellular response to iron ion starvation; glucuronoxylan metabolic process; iron ion transport; nitrate transport; protein phosphorylation; response to nitrate; transition metal ion transport; xylan biosynthetic process	GO:0004672 GO:0004674 GO:0005524 GO:0016301 GO:0016772	ATP binding; kinase activity; protein kinase activity; protein serine/threonine kinase activity; transferase activity, transferring phosphorus-containing groups	GO:0005576	extracellular region
Glyma.18G219700	AT1G11410	S-locus lectin protein kinase family protein		GO:0006468 GO:0048544	protein phosphorylation; recognition of pollen	GO:0004672 GO:0004674 GO:0004713 GO:0005524 GO:0016301 GO:0016772 GO:0030246	ATP binding; carbohydrate binding; kinase activity; protein kinase activity; protein serine/threonine kinase activity; protein tyrosine kinase activity; transferase activity, transferring phosphorus-containing groups	GO:0005886	plasma membrane
Glyma.18G223900	AT1G08500	early nodulin-like protein 18		NA	NA	GO:0005507 GO:0009055	copper ion binding; electron carrier activity	GO:0005886 GO:0031225	anchored to membrane; plasma membrane
Glyma.18G224200	AT3G61130	galacturonosyltransferase 1		GO:0010075 GO:0010289 GO:0016051	carbohydrate biosynthetic process; homogalacturonan biosynthetic process; regulation of meristem growth	GO:0016757 GO:0047262	polygalacturonate 4-alpha-galacturonosyltransferase activity; transferase activity, transferring glycosyl groups	GO:0005768 GO:0005794 GO:0005802	Golgi apparatus; endosome; trans-Golgi network
Glyma.18G240700	AT1G65410	non-intrinsic ABC protein 11		GO:0006869	lipid transport	GO:0000166 GO:0005215 GO:0005524 GO:0016887 GO:0017111	ATP binding; ATPase activity; nucleoside-triphosphatase activity; nucleotide binding; transporter activity	GO:0009507 GO:0009536	chloroplast; plastid
Glyma.18G241100	AT4G18530	Protein of unknown function (DUF707)		GO:0008150	biological process	GO:0016757	transferase activity, transferring glycosyl groups	NA	NA
Glyma.18G253800	AT3G60390	homeobox-leucine zipper protein 3	HD-ZIP	GO:0006351 GO:0006355	regulation of transcription, DNA-dependent; transcription, DNA-dependent	GO:0003677 GO:0003700 GO:0043565	DNA binding; sequence-specific DNA binding; sequence-specific DNA binding transcription factor activity	GO:0005634	nucleus
Glyma.18G254000	AT4G08850	Leucine-rich repeat receptor-like protein kinase family protein		GO:0006468 GO:0006857 GO:0006995 GO:0009627 GO:0031347	cellular response to nitrogen starvation; oligopeptide transport; protein phosphorylation; regulation of defense response; systemic acquired resistance	GO:0004672 GO:0004713 GO:0005524 GO:0016301 GO:0016772	ATP binding; kinase activity; protein kinase activity; protein tyrosine kinase activity; transferase activity, transferring phosphorus-containing groups	GO:0005634 GO:0005886 GO:0009506 GO:0016020	membrane; nucleus; plasma membrane; plasmodesma
Glyma.18G254400	AT4G08850	Leucine-rich repeat receptor-like protein kinase family protein		GO:0006468 GO:0006857 GO:0006995 GO:0009627 GO:0031347	cellular response to nitrogen starvation; oligopeptide transport; protein phosphorylation; regulation of defense response; systemic acquired resistance	GO:0004672 GO:0004713 GO:0005524 GO:0016301 GO:0016772	ATP binding; kinase activity; protein kinase activity; protein tyrosine kinase activity; transferase activity, transferring phosphorus-containing groups	GO:0005634 GO:0005886 GO:0009506 GO:0016020	membrane; nucleus; plasma membrane; plasmodesma
Glyma.18G254500	AT4G08850	Leucine-rich repeat receptor-like protein kinase family protein		GO:0006468 GO:0006857 GO:0006995 GO:0009627 GO:0031347	cellular response to nitrogen starvation; oligopeptide transport; protein phosphorylation; regulation of defense response; systemic acquired resistance	GO:0004672 GO:0004713 GO:0005524 GO:0016301 GO:0016772	ATP binding; kinase activity; protein kinase activity; protein tyrosine kinase activity; transferase activity, transferring phosphorus-containing groups	GO:0005634 GO:0005886 GO:0009506 GO:0016020	membrane; nucleus; plasma membrane; plasmodesma
Glyma.18G254700	AT4G08850	Leucine-rich repeat receptor-like protein kinase family protein		GO:0006468 GO:0006857 GO:0006995 GO:0009627 GO:0031347	cellular response to nitrogen starvation; oligopeptide transport; protein phosphorylation; regulation of defense response; systemic acquired resistance	GO:0004672 GO:0004713 GO:0005524 GO:0016301 GO:0016772	ATP binding; kinase activity; protein kinase activity; protein tyrosine kinase activity; transferase activity, transferring phosphorus-containing groups	GO:0005634 GO:0005886 GO:0009506 GO:0016020	membrane; nucleus; plasma membrane; plasmodesma
Glyma.18G258000	AT3G29590	HXXXD-type acyl-transferase family protein		GO:0009718 GO:0009744 GO:0010224	anthocyanin-containing compound biosynthetic process; response to UV-B; response to sucrose stimulus	GO:0016740 GO:0016747 GO:0050736	O-malonyltransferase activity; transferase activity; transferase activity, transferring acyl groups other than amino-acyl groups	GO:0005737	cytoplasm
Glyma.18G259000	AT5G39785	Protein of unknown function (DUF1666)		GO:0006412	translation	GO:0003735	structural constituent of ribosome	GO:0005622 GO:0005634 GO:0005840	intracellular; nucleus; ribosome
Glyma.18G261900	AT3G29060	EXS (ERD1/XPR1/SYG1) family protein		GO:0006817 GO:0016036	cellular response to phosphate starvation; phosphate ion transport	NA	NA	GO:0005886 GO:0016021	integral to membrane; plasma membrane
Glyma.18G271900	AT5G60920	COBRA-like extracellular glycosyl-phosphatidyl inositol-anchored protein family		GO:0000271 GO:0000272 GO:0005982 GO:0006096 GO:0006816 GO:0006833 GO:0006972 GO:0007030 GO:0007389 GO:0008361 GO:0009266 GO:0009651 GO:0009664 GO:0009750 GO:0009825 GO:0009832 GO:0009926 GO:0009932 GO:0010015 GO:0010215 GO:0010817 GO:0016049 GO:0030243 GO:0040007 GO:0043481 GO:0046686 GO:0048767 GO:0071555	Golgi organization; anthocyanin accumulation in tissues in response to UV light; auxin polar transport; calcium ion transport; cell growth; cell tip growth; cell wall organization; cellulose metabolic process; cellulose microfibril organization; glycolysis; growth; hyperosmotic response; multidimensional cell growth; pattern specification process; plant-type cell wall biogenesis; plant-type cell …	GO:0003674	molecular function	GO:0005886 GO:0009505 GO:0009897 GO:0009930 GO:0031225 GO:0046658	anchored to membrane; anchored to plasma membrane; external side of plasma membrane; longitudinal side of cell surface; plant-type cell wall; plasma membrane
Glyma.18G273700	AT3G02300	Regulator of chromosome condensation (RCC1) family protein		GO:0008150	biological process	GO:0008536	Ran GTPase binding	NA	NA
Glyma.18G280900	AT1G13280	allene oxide cyclase 4		GO:0009695	jasmonic acid biosynthetic process	GO:0016853 GO:0046423	allene-oxide cyclase activity; isomerase activity	GO:0005886 GO:0009507	chloroplast; plasma membrane
Glyma.18G281600	AT1G09730	Cysteine proteinases superfamily protein		GO:0000956 GO:0006508 GO:0016926	nuclear-transcribed mRNA catabolic process; protein desumoylation; proteolysis	GO:0008234 GO:0016929	SUMO-specific protease activity; cysteine-type peptidase activity	GO:0005634	nucleus
Glyma.18G290300	AT2G44310	Calcium-binding EF-hand family protein		GO:0008150	biological process	GO:0005509	calcium ion binding	GO:0005634 GO:0005829	cytosol; nucleus
Glyma.18G291500	AT3G55430	O-Glycosyl hydrolases family 17 protein		GO:0005975 GO:0010200	carbohydrate metabolic process; response to chitin	GO:0003824 GO:0004553 GO:0043169	catalytic activity; cation binding; hydrolase activity, hydrolyzing O-glycosyl compounds	GO:0005576 GO:0005618 GO:0009506	cell wall; extracellular region; plasmodesma
Glyma.18G294800	AT5G38210	Protein kinase family protein		GO:0006468 GO:0009617 GO:0045087 GO:0046777	innate immune response; protein autophosphorylation; protein phosphorylation; response to bacterium	GO:0004672 GO:0004674 GO:0005524 GO:0016772	ATP binding; protein kinase activity; protein serine/threonine kinase activity; transferase activity, transferring phosphorus-containing groups	GO:0005886	plasma membrane
Glyma.19G002400	AT5G38200	Class I glutamine amidotransferase-like superfamily protein		GO:0006541	glutamine metabolic process	GO:0016787	hydrolase activity	GO:0005794	Golgi apparatus
Glyma.19G014800	AT4G31970	cytochrome P450, family 82, subfamily C, polypeptide 2		GO:0055114 GO:0071456	cellular response to hypoxia; oxidation-reduction process	GO:0004497 GO:0005506 GO:0009055 GO:0016705 GO:0019825 GO:0020037	electron carrier activity; heme binding; iron ion binding; monooxygenase activity; oxidoreductase activity, acting on paired donors, with incorporation or reduction of molecular oxygen; oxygen binding	GO:0009507	chloroplast
Glyma.19G033500	AT5G60920	COBRA-like extracellular glycosyl-phosphatidyl inositol-anchored protein family		GO:0000271 GO:0000272 GO:0005982 GO:0006096 GO:0006816 GO:0006833 GO:0006972 GO:0007030 GO:0007389 GO:0008361 GO:0009266 GO:0009651 GO:0009664 GO:0009750 GO:0009825 GO:0009832 GO:0009926 GO:0009932 GO:0010015 GO:0010215 GO:0010817 GO:0016049 GO:0030243 GO:0040007 GO:0043481 GO:0046686 GO:0048767 GO:0071555	Golgi organization; anthocyanin accumulation in tissues in response to UV light; auxin polar transport; calcium ion transport; cell growth; cell tip growth; cell wall organization; cellulose metabolic process; cellulose microfibril organization; glycolysis; growth; hyperosmotic response; multidimensional cell growth; pattern specification process; plant-type cell wall biogenesis; plant-type cell …	GO:0003674	molecular function	GO:0005886 GO:0009505 GO:0009897 GO:0009930 GO:0031225 GO:0046658	anchored to membrane; anchored to plasma membrane; external side of plasma membrane; longitudinal side of cell surface; plant-type cell wall; plasma membrane
Glyma.19G057500	AT1G76690	12-oxophytodienoate reductase 2		GO:0009611 GO:0055114	oxidation-reduction process; response to wounding	GO:0003824 GO:0010181 GO:0016491 GO:0016629	12-oxophytodienoate reductase activity; FMN binding; catalytic activity; oxidoreductase activity	GO:0005737	cytoplasm
Glyma.19G063100	AT5G23240	DNAJ heat shock N-terminal domain-containing protein		GO:0006457	protein folding	GO:0031072 GO:0051082	heat shock protein binding; unfolded protein binding	GO:0009507	chloroplast
Glyma.19G065800	AT5G53050	alpha/beta-Hydrolases superfamily protein		NA	NA	GO:0003824 GO:0016787	catalytic activity; hydrolase activity	GO:0005737	cytoplasm
Glyma.19G094100	AT5G13080	WRKY DNA-binding protein 75	WRKY	GO:0006355 GO:0009723 GO:0016036 GO:0019375 GO:0032107 GO:0042631 GO:0043620 GO:0048527	cellular response to phosphate starvation; cellular response to water deprivation; galactolipid biosynthetic process; lateral root development; regulation of DNA-dependent transcription in response to stress; regulation of response to nutrient levels; regulation of transcription, DNA-dependent; response to ethylene stimulus	GO:0003700 GO:0043565	sequence-specific DNA binding; sequence-specific DNA binding transcription factor activity	GO:0005634	nucleus
Glyma.19G133500	NA	NA		NA	NA	NA	NA	NA	NA
Glyma.19G144600	AT2G42250	cytochrome P450, family 712, subfamily A, polypeptide 1		GO:0055114	oxidation-reduction process	GO:0005506 GO:0009055 GO:0016705 GO:0019825 GO:0020037	electron carrier activity; heme binding; iron ion binding; oxidoreductase activity, acting on paired donors, with incorporation or reduction of molecular oxygen; oxygen binding	GO:0005576	extracellular region
Glyma.19G145200	AT5G06860	polygalacturonase inhibiting protein 1		GO:0000165 GO:0006612 GO:0006865 GO:0006952 GO:0007154 GO:0007165 GO:0009409 GO:0009738 GO:0009862 GO:0009867 GO:0010363 GO:0030968 GO:0031348 GO:0043069 GO:0050832	MAPK cascade; abscisic acid mediated signaling pathway; amino acid transport; cell communication; defense response; defense response to fungus; endoplasmic reticulum unfolded protein response; jasmonic acid mediated signaling pathway; negative regulation of defense response; negative regulation of programmed cell death; protein targeting to membrane; regulation of plant-type hypersensitive respon…	GO:0090353	polygalacturonase inhibitor activity	GO:0005576 GO:0005618 GO:0005794 GO:0009505 GO:0009506	Golgi apparatus; cell wall; extracellular region; plant-type cell wall; plasmodesma
Glyma.19G152300	AT2G48010	receptor-like kinase in in flowers 3		GO:0006468	protein phosphorylation	GO:0004672 GO:0004674 GO:0004702 GO:0005524 GO:0016301 GO:0016772	ATP binding; kinase activity; protein kinase activity; protein serine/threonine kinase activity; receptor signaling protein serine/threonine kinase activity; transferase activity, transferring phosphorus-containing groups	GO:0005576 GO:0005886	extracellular region; plasma membrane
Glyma.19G166800	AT1G04010	phospholipid sterol acyl transferase 1		GO:0006629 GO:0010150 GO:0016127 GO:0034434	leaf senescence; lipid metabolic process; sterol catabolic process; sterol esterification	GO:0004607 GO:0008374 GO:0080095 GO:0080096	O-acyltransferase activity; phosphatidate-sterol O-acyltransferase activity; phosphatidylcholine-sterol O-acyltransferase activity; phosphatidylethanolamine-sterol O-acyltransferase activity	GO:0043231	intracellular membrane-bounded organelle
Glyma.19G170500	AT2G20300	Protein kinase superfamily protein		GO:0006468 GO:0009664 GO:0009965 GO:0010068 GO:0042335 GO:0042545 GO:0046777 GO:0048367 GO:0048645	cell wall modification; cuticle development; leaf morphogenesis; organ formation; plant-type cell wall organization; protein autophosphorylation; protein phosphorylation; protoderm histogenesis; shoot system development	GO:0004672 GO:0004674 GO:0005524 GO:0016301 GO:0016772	ATP binding; kinase activity; protein kinase activity; protein serine/threonine kinase activity; transferase activity, transferring phosphorus-containing groups	GO:0005886	plasma membrane
Glyma.19G171400	AT5G26594	response regulator 24		GO:0000160 GO:0006355	phosphorelay signal transduction system; regulation of transcription, DNA-dependent	GO:0000156	phosphorelay response regulator activity	GO:0009507	chloroplast
Glyma.19G181000	AT5G03190	conserved peptide upstream open reading frame 47		GO:0008152	metabolic process	GO:0008168	methyltransferase activity	GO:0005739	mitochondrion
Glyma.19G193100	AT3G52890	KCBP-interacting protein kinase		GO:0000278 GO:0006396	RNA processing; mitotic cell cycle	GO:0004672 GO:0004674 GO:0005515 GO:0005524 GO:0016301 GO:0016772	ATP binding; kinase activity; protein binding; protein kinase activity; protein serine/threonine kinase activity; transferase activity, transferring phosphorus-containing groups	GO:0005634 GO:0005737	cytoplasm; nucleus
Glyma.19G198800	AT2G35980	Late embryogenesis abundant (LEA) hydroxyproline-rich glycoprotein family		GO:0000165 GO:0002679 GO:0006612 GO:0006944 GO:0009862 GO:0009867 GO:0010150 GO:0010200 GO:0010310 GO:0010363 GO:0031348 GO:0042742 GO:0043069 GO:0050832 GO:0051607 GO:0051707	MAPK cascade; cellular membrane fusion; defense response to bacterium; defense response to fungus; defense response to virus; jasmonic acid mediated signaling pathway; leaf senescence; negative regulation of defense response; negative regulation of programmed cell death; protein targeting to membrane; regulation of hydrogen peroxide metabolic process; regulation of plant-type hypersensitive respo…	GO:0003674	molecular function	GO:0005739 GO:0009507	chloroplast; mitochondrion
Glyma.19G201400	AT5G04870	calcium dependent protein kinase 1		GO:0006468 GO:0006499 GO:0046777	N-terminal protein myristoylation; protein autophosphorylation; protein phosphorylation	GO:0004672 GO:0004674 GO:0004683 GO:0005509 GO:0005515 GO:0005524 GO:0016301 GO:0016772	ATP binding; calcium ion binding; calmodulin-dependent protein kinase activity; kinase activity; protein binding; protein kinase activity; protein serine/threonine kinase activity; transferase activity, transferring phosphorus-containing groups	GO:0005777 GO:0009507 GO:0016020	chloroplast; membrane; peroxisome
Glyma.19G210300	AT2G44750	thiamin pyrophosphokinase 2		GO:0006772 GO:0009229	thiamine diphosphate biosynthetic process; thiamine metabolic process	GO:0004788 GO:0005524	ATP binding; thiamine diphosphokinase activity	GO:0005737 GO:0005829	cytoplasm; cytosol
Glyma.19G229400	AT4G25800	Calmodulin-binding protein		GO:0008150	biological process	GO:0005516	calmodulin binding	GO:0005634	nucleus
Glyma.19G231800	AT3G05600	alpha/beta-Hydrolases superfamily protein		NA	NA	GO:0003824 GO:0004301	catalytic activity; epoxide hydrolase activity	GO:0005737	cytoplasm
Glyma.19G242000	AT5G17540	HXXXD-type acyl-transferase family protein		NA	NA	GO:0016747	transferase activity, transferring acyl groups other than amino-acyl groups	GO:0005737	cytoplasm
Glyma.19G242100	AT5G17540	HXXXD-type acyl-transferase family protein		NA	NA	GO:0016747	transferase activity, transferring acyl groups other than amino-acyl groups	GO:0005737	cytoplasm
Glyma.19G245400	AT3G04720	pathogenesis-related 4		GO:0009615 GO:0009627 GO:0009651 GO:0009723 GO:0009817 GO:0010167 GO:0015706 GO:0016998 GO:0042742 GO:0050832 GO:0080027	cell wall macromolecule catabolic process; defense response to bacterium; defense response to fungus; defense response to fungus, incompatible interaction; nitrate transport; response to ethylene stimulus; response to herbivore; response to nitrate; response to salt stress; response to virus; systemic acquired resistance	GO:0004540 GO:0008061	chitin binding; ribonuclease activity	GO:0005576	extracellular region
Glyma.19G250900	AT5G18310	NA		GO:0008150	biological process	GO:0003674	molecular function	GO:0005634 GO:0005886	nucleus; plasma membrane
Glyma.19G255500	AT5G53130	cyclic nucleotide gated channel 1		GO:0006811 GO:0006813 GO:0006816 GO:0055085	calcium ion transport; ion transport; potassium ion transport; transmembrane transport	GO:0005216 GO:0005221 GO:0005242 GO:0005261 GO:0005516 GO:0030551	calmodulin binding; cation channel activity; cyclic nucleotide binding; intracellular cyclic nucleotide activated cation channel activity; inward rectifier potassium channel activity; ion channel activity	GO:0005886 GO:0016020	membrane; plasma membrane
Glyma.19G257500	AT3G61850	Dof-type zinc finger DNA-binding family protein	Dof	GO:0006355 GO:0009639 GO:0009845	regulation of transcription, DNA-dependent; response to red or far red light; seed germination	GO:0003677 GO:0003700 GO:0008270	DNA binding; sequence-specific DNA binding transcription factor activity; zinc ion binding	GO:0005634	nucleus
Glyma.19G260400	AT5G24470	pseudo-response regulator 5		GO:0000160 GO:0005982 GO:0006355 GO:0007623 GO:0009639 GO:0009640 GO:0010114 GO:0010218 GO:0042752 GO:0045892 GO:0048574 GO:0051170	circadian rhythm; long-day photoperiodism, flowering; negative regulation of transcription, DNA-dependent; nuclear import; phosphorelay signal transduction system; photomorphogenesis; regulation of circadian rhythm; regulation of transcription, DNA-dependent; response to far red light; response to red light; response to red or far red light; starch metabolic process	GO:0000156 GO:0003677	DNA binding; phosphorelay response regulator activity	GO:0005634	nucleus
Glyma.20G013400	AT2G01340	Encodes a protein whose expression is responsive to nematode infection.		GO:0006499 GO:0009624	N-terminal protein myristoylation; response to nematode	GO:0003674	molecular function	GO:0005886	plasma membrane
Glyma.20G020200	AT5G17680	disease resistance protein (TIR-NBS-LRR class), putative		GO:0006952 GO:0007165	defense response; signal transduction	GO:0043531	ADP binding	GO:0005622	intracellular
Glyma.20G036400	AT2G02960	RING/FYVE/PHD zinc finger superfamily protein		NA	NA	GO:0008270	zinc ion binding	GO:0005634	nucleus
Glyma.20G061300	AT5G17680	disease resistance protein (TIR-NBS-LRR class), putative		GO:0006952 GO:0007165	defense response; signal transduction	GO:0043531	ADP binding	GO:0005622	intracellular
Glyma.20G062000	AT5G47650	nudix hydrolase homolog 2		GO:0006979	response to oxidative stress	GO:0016787 GO:0047631 GO:0051287	ADP-ribose diphosphatase activity; NAD binding; hydrolase activity	GO:0005829	cytosol
Glyma.20G065500	AT3G22275	NA		GO:0008150	biological process	GO:0003674	molecular function	GO:0005634	nucleus
Glyma.20G067300	AT4G10770	oligopeptide transporter 7		GO:0006857 GO:0055085	oligopeptide transport; transmembrane transport	GO:0015198	oligopeptide transporter activity	GO:0016020	membrane
Glyma.20G096100	AT1G09250	basic helix-loop-helix (bHLH) DNA-binding superfamily protein		NA	NA	GO:0003700	sequence-specific DNA binding transcription factor activity	GO:0005634	nucleus
Glyma.20G099400	AT4G35550	WUSCHEL related homeobox 13	WOX	GO:0006355	regulation of transcription, DNA-dependent	GO:0003677 GO:0003700 GO:0043565	DNA binding; sequence-specific DNA binding; sequence-specific DNA binding transcription factor activity	GO:0005634	nucleus
Glyma.20G102600	AT3G19970	alpha/beta-Hydrolases superfamily protein		GO:0006612 GO:0008150 GO:0009414 GO:0009611 GO:0009620 GO:0009695 GO:0009753 GO:0009863 GO:0009867 GO:0010200 GO:0010363 GO:0042538 GO:0052542	biological process; defense response by callose deposition; hyperosmotic salinity response; jasmonic acid biosynthetic process; jasmonic acid mediated signaling pathway; protein targeting to membrane; regulation of plant-type hypersensitive response; response to chitin; response to fungus; response to jasmonic acid stimulus; response to water deprivation; response to wounding; salicylic acid medi…	GO:0003674	molecular function	NA	NA
Glyma.20G104600	AT3G30340	nodulin MtN21 /EamA-like transporter family protein		NA	NA	NA	NA	GO:0016020	membrane
Glyma.20G110000	AT3G54260	TRICHOME BIREFRINGENCE-LIKE 36		GO:0008150 GO:0010089 GO:0044036	biological process; cell wall macromolecule metabolic process; xylem development	NA	NA	NA	NA
Glyma.20G116800	AT1G68290	endonuclease 2		GO:0006308	DNA catabolic process	GO:0003676 GO:0004519	endonuclease activity; nucleic acid binding	GO:0005576	extracellular region
Glyma.20G117000	AT1G68320	myb domain protein 62	MYB	GO:0006355 GO:0009686 GO:0009751 GO:0009855 GO:0009944 GO:0010014 GO:0010075 GO:0016036	cellular response to phosphate starvation; determination of bilateral symmetry; gibberellin biosynthetic process; meristem initiation; polarity specification of adaxial/abaxial axis; regulation of meristem growth; regulation of transcription, DNA-dependent; response to salicylic acid stimulus	GO:0003677 GO:0003700	DNA binding; sequence-specific DNA binding transcription factor activity	GO:0005634	nucleus
Glyma.20G118100	AT1G68390	Core-2/I-branching beta-1,6-N-acetylglucosaminyltransferase family protein		NA	NA	GO:0016757	transferase activity, transferring glycosyl groups	GO:0016020	membrane
Glyma.20G119600	AT1G25390	Protein kinase superfamily protein		GO:0006468 GO:0006865 GO:0009627 GO:0031347	amino acid transport; protein phosphorylation; regulation of defense response; systemic acquired resistance	GO:0004672 GO:0004674 GO:0005524 GO:0016301 GO:0016772	ATP binding; kinase activity; protein kinase activity; protein serine/threonine kinase activity; transferase activity, transferring phosphorus-containing groups	GO:0005886	plasma membrane
Glyma.20G131500	AT4G33920	Protein phosphatase 2C family protein		GO:0006470 GO:0006612 GO:0006944 GO:0010200 GO:0010363 GO:0030968 GO:0043069 GO:0052542	cellular membrane fusion; defense response by callose deposition; endoplasmic reticulum unfolded protein response; negative regulation of programmed cell death; protein dephosphorylation; protein targeting to membrane; regulation of plant-type hypersensitive response; response to chitin	GO:0003824 GO:0004722	catalytic activity; protein serine/threonine phosphatase activity	NA	NA
Glyma.20G137300	AT4G38830	cysteine-rich RLK (RECEPTOR-like protein kinase) 26		GO:0006468 GO:0006826 GO:0010106 GO:0010167 GO:0015706	cellular response to iron ion starvation; iron ion transport; nitrate transport; protein phosphorylation; response to nitrate	GO:0004672 GO:0004674 GO:0004713 GO:0005524 GO:0016301 GO:0016772	ATP binding; kinase activity; protein kinase activity; protein serine/threonine kinase activity; protein tyrosine kinase activity; transferase activity, transferring phosphorus-containing groups	GO:0005576	extracellular region
Glyma.20G137700	AT4G21410	cysteine-rich RLK (RECEPTOR-like protein kinase) 29		GO:0006468 GO:0009737	protein phosphorylation; response to abscisic acid stimulus	GO:0004672 GO:0004674 GO:0005524 GO:0016301 GO:0016772	ATP binding; kinase activity; protein kinase activity; protein serine/threonine kinase activity; transferase activity, transferring phosphorus-containing groups	GO:0005576 GO:0005773 GO:0005886	extracellular region; plasma membrane; vacuole
Glyma.20G144800	AT2G32150	Haloacid dehalogenase-like hydrolase (HAD) superfamily protein		GO:0008152	metabolic process	GO:0003824 GO:0016787	catalytic activity; hydrolase activity	NA	NA
Glyma.20G155100	AT5G51990	C-repeat-binding factor 4	ERF	GO:0006355	regulation of transcription, DNA-dependent	GO:0003677 GO:0003700	DNA binding; sequence-specific DNA binding transcription factor activity	GO:0005634	nucleus
Glyma.20G155500	AT4G23030	MATE efflux family protein		GO:0006855 GO:0055085	drug transmembrane transport; transmembrane transport	GO:0005215 GO:0015238 GO:0015297	antiporter activity; drug transmembrane transporter activity; transporter activity	GO:0005886 GO:0016020	membrane; plasma membrane
Glyma.20G159600	AT5G52400	cytochrome P450, family 715, subfamily A, polypeptide 1		GO:0055114	oxidation-reduction process	GO:0005506 GO:0009055 GO:0016705 GO:0019825 GO:0020037	electron carrier activity; heme binding; iron ion binding; oxidoreductase activity, acting on paired donors, with incorporation or reduction of molecular oxygen; oxygen binding	NA	NA
Glyma.20G177600	AT1G07900	LOB domain-containing protein 1	LBD	GO:0008150	biological process	NA	NA	GO:0005634 GO:0005739	mitochondrion; nucleus
Glyma.20G178300	AT4G25030	NA		GO:0006612 GO:0006944 GO:0007165 GO:0008150 GO:0009414 GO:0009611 GO:0009723 GO:0009733 GO:0009738 GO:0009753 GO:0009805 GO:0010363 GO:0030968 GO:0035556 GO:0042538 GO:0043069	abscisic acid mediated signaling pathway; biological process; cellular membrane fusion; coumarin biosynthetic process; endoplasmic reticulum unfolded protein response; hyperosmotic salinity response; intracellular signal transduction; negative regulation of programmed cell death; protein targeting to membrane; regulation of plant-type hypersensitive response; response to auxin stimulus; response …	GO:0003674	molecular function	GO:0005634	nucleus
Glyma.20G200000	NA	NA		NA	NA	NA	NA	NA	NA
Glyma.20G203700	AT3G23240	ethylene response factor 1	ERF	GO:0006355 GO:0006952 GO:0009867 GO:0009873	defense response; ethylene mediated signaling pathway; jasmonic acid mediated signaling pathway; regulation of transcription, DNA-dependent	GO:0003677 GO:0003700	DNA binding; sequence-specific DNA binding transcription factor activity	GO:0005634	nucleus
Glyma.20G225200	AT3G04720	pathogenesis-related 4		GO:0009615 GO:0009627 GO:0009651 GO:0009723 GO:0009817 GO:0010167 GO:0015706 GO:0016998 GO:0042742 GO:0050832 GO:0080027	cell wall macromolecule catabolic process; defense response to bacterium; defense response to fungus; defense response to fungus, incompatible interaction; nitrate transport; response to ethylene stimulus; response to herbivore; response to nitrate; response to salt stress; response to virus; systemic acquired resistance	GO:0004540 GO:0008061	chitin binding; ribonuclease activity	GO:0005576	extracellular region
Glyma.U020900	AT1G07900	LOB domain-containing protein 1	LBD	GO:0008150	biological process	NA	NA	GO:0005634 GO:0005739	mitochondrion; nucleus
Glyma.U021800	AT3G45640	mitogen-activated protein kinase 3		GO:0000165 GO:0000169 GO:0001666 GO:0006355 GO:0006612 GO:0006970 GO:0006979 GO:0007165 GO:0009409 GO:0009595 GO:0009611 GO:0009617 GO:0009697 GO:0009738 GO:0009814 GO:0009862 GO:0009863 GO:0009867 GO:0010120 GO:0010200 GO:0010224 GO:0010229 GO:0010310 GO:0010363 GO:0010374 GO:0019684 GO:0031347 GO:0031348 GO:0035304 GO:0035556 GO:0042742 GO:0043069 GO:0043900 GO:0048481 GO:0050832 GO:0051707 GO:…	MAPK cascade; abscisic acid mediated signaling pathway; activation of MAPK activity involved in osmosensory signaling pathway; camalexin biosynthetic process; defense response, incompatible interaction; defense response to bacterium; defense response to fungus; detection of biotic stimulus; inflorescence development; intracellular signal transduction; jasmonic acid mediated signaling pathway; neg…	GO:0004672 GO:0004707 GO:0005515 GO:0016301	MAP kinase activity; kinase activity; protein binding; protein kinase activity	GO:0005634	nucleus
Glyma.U029600	AT3G49780	phytosulfokine 4 precursor		GO:0008283 GO:0009887 GO:0030154	cell differentiation; cell proliferation; organ morphogenesis	GO:0008083	growth factor activity	GO:0005576 GO:0005794 GO:0031012	Golgi apparatus; extracellular matrix; extracellular region
Glyma.U032900	AT5G23960	terpene synthase 21		GO:0008152 GO:0016106 GO:0051762 GO:0080027	metabolic process; response to herbivore; sesquiterpene biosynthetic process; sesquiterpenoid biosynthetic process	GO:0000287 GO:0010333 GO:0016829 GO:0080016 GO:0080017	(-)-E-beta-caryophyllene synthase activity; alpha-humulene synthase activity; lyase activity; magnesium ion binding; terpene synthase activity	GO:0009507	chloroplast
Glyma.U035800	AT4G20970	basic helix-loop-helix (bHLH) DNA-binding superfamily protein	bHLH	GO:0006355 GO:0050832	defense response to fungus; regulation of transcription, DNA-dependent	GO:0003677 GO:0003700	DNA binding; sequence-specific DNA binding transcription factor activity	GO:0005634	nucleus
Glyma.U040600	AT4G39830	Cupredoxin superfamily protein		GO:0009627 GO:0009697 GO:0016126 GO:0046520 GO:0055114	oxidation-reduction process; salicylic acid biosynthetic process; sphingoid biosynthetic process; sterol biosynthetic process; systemic acquired resistance	GO:0005507 GO:0016491	copper ion binding; oxidoreductase activity	GO:0005576	extracellular region

## Sheet: Expression
The expression levels (FPKM) of CRGs
If FPKM is equal to 0 then record as 0.001 and used to calculate log2 fold change
The genes marked in red are the differently expressed genes (|log2 fold change|≥1 and p adjust <0.05) between K6E and JY93E
Gene Locus	JY93	JY93E	K6	K6E	log2(JY93E_JY93)	log2(K6E_K6)	log2(K6_JY93)	log2(K6E_JY93E)
Glyma.01G004200	6.59975	34.0393	5.1748	16.2235	2.36672	1.64851	-0.35091	-1.06912
Glyma.01G006000	37.0131	9.59707	1.9999	8.82923	-1.94737	2.14236	-4.21004	-0.120306
Glyma.01G013500	18.393	42.8502	5.41423	12.4317	1.22014	1.1992	-1.76433	-1.78527
Glyma.01G014700	1.05142	8.24311	0.721633	9.83622	2.97085	3.76877	-0.543006	0.254915
Glyma.01G036000	0.008826	1.002	0.192233	2.12142	6.8269	3.46411	4.44495	1.08215
Glyma.01G036900	3.7618	21.0164	2.79718	12.0008	2.48202	2.10109	-0.427452	-0.808384
Glyma.01G041400	6.02453	25.261	4.53695	15.3457	2.06799	1.75804	-0.409127	-0.719079
Glyma.01G046000	0.618292	1.57276	0.760562	2.3891	1.34694	1.65133	0.298778	0.60317
Glyma.01G050100	181.979	78.3467	301.719	127.363	-1.21583	-1.24426	0.729434	0.701005
Glyma.01G105000	0.312394	2.51173	0.289452	5.4931	3.00724	4.24623	-0.110043	1.12894
Glyma.01G106000	15.9131	50.5224	17.6396	39.5418	1.66671	1.16456	0.148599	-0.353544
Glyma.01G108700	14.042	53.3428	14.9638	55.9401	1.92555	1.9024	0.0917323	0.0685893
Glyma.01G109800	1.98547	5.8033	2.84413	7.40044	1.54739	1.37962	0.51851	0.350738
Glyma.01G112300	0.188901	0.985194	0.083481	1.70683	2.38278	4.35372	-1.17811	0.792837
Glyma.01G112900	12.7394	31.2547	15.8799	71.1855	1.29478	2.16438	0.317903	1.18751
Glyma.01G115500	0.310595	4.35025	2.02582	10.8382	3.80799	2.41955	2.7054	1.31696
Glyma.01G115600	0.429535	1.51492	0.451399	4.20512	1.8184	3.21967	0.0716265	1.4729
Glyma.01G119300	2.1223	0.707507	2.81373	0.711264	-1.58481	-1.98403	0.406856	0.00764072
Glyma.01G128100	8.95176	28.7751	1.38923	39.3421	1.68458	4.82372	-2.68789	0.451254
Glyma.01G129100	4.96777	16.4402	4.77105	18.6067	1.72655	1.96344	-0.0582921	0.178593
Glyma.01G131900	4.73868	2.34501	3.86546	1.81155	-1.01489	-1.09341	-0.293843	-0.372369
Glyma.01G153300	3.25636	13.786	0.503415	20.11	2.08188	5.32002	-2.69344	0.544708
Glyma.01G158600	5.71368	2.54656	5.04408	2.37697	-1.16587	-1.08547	-0.179827	-0.0994229
Glyma.01G161100	3.81411	21.1422	2.09605	9.0262	2.47071	2.10644	-0.863673	-1.22794
Glyma.01G163000	7.84383	17.2871	9.37476	22.2329	1.14006	1.24585	0.257222	0.363007
Glyma.01G166100	4.77829	14.3434	4.28184	25.5857	1.58582	2.57903	-0.158265	0.834949
Glyma.01G168500	5.79117	24.7494	55.6571	18.5932	2.09547	-1.58179	3.26464	-0.412614
Glyma.01G183100	4.19558	10.1819	2.67642	16.9906	1.27907	2.66636	-0.648568	0.738731
Glyma.01G187400	1.1302	2.38281	3.98395	1.53904	1.07608	-1.37217	1.81762	-0.630635
Glyma.01G189100	4.12468	13.5829	6.33086	13.5576	1.71944	1.09863	0.618119	-0.00268734
Glyma.01G193600	5.63281	18.1808	2.67219	35.1931	1.69049	3.7192	-1.07584	0.952874
Glyma.01G195000	1.15995	3.75873	3.05668	10.3391	1.69618	1.75808	1.3979	1.4598
Glyma.01G197900	0.187589	2.9911	0.038583	1.9404	3.99503	5.65225	-2.28154	-0.624322
Glyma.01G198200	0.272155	1.13984	0.442327	1.66558	2.06633	1.91284	0.700688	0.547194
Glyma.01G203500	3.90264	12.0163	2.65366	15.6215	1.62248	2.55748	-0.556466	0.378535
Glyma.01G204200	11.7841	33.0988	10.3328	63.1457	1.48994	2.61145	-0.189607	0.931907
Glyma.01G206500	7.07572	3.24659	2.33412	4.99608	-1.12395	1.09792	-1.6	0.621871
Glyma.01G206600	47.5643	20.1939	4.51933	35.7424	-1.23596	2.98345	-3.3957	0.823714
Glyma.01G207900	1.02369	8.18649	0.709351	9.64564	2.99946	3.76531	-0.529213	0.236631
Glyma.01G211900	3.32282	7.16893	5.35092	14.161	1.10935	1.40406	0.687378	0.982093
Glyma.01G215100	2.29439	6.66638	2.87359	5.94348	1.53879	1.04845	0.324747	-0.165596
Glyma.01G216600	0.346167	5.35591	0.080681	13.4047	3.95159	7.3763	-2.10117	1.32354
Glyma.01G232000	0.371686	1.33256	0.059388	1.26226	1.84204	4.40969	-2.64584	-0.0781947
Glyma.02G007400	3.18115	11.6714	1.5286	17.5575	1.87536	3.5218	-1.05734	0.589107
Glyma.02G009500	8.44501	33.4163	13.6995	36.7943	1.98438	1.42535	0.697957	0.138932
Glyma.02G017100	12.4431	44.1938	10.6254	67.4973	1.8285	2.66731	-0.227824	0.610988
Glyma.02G022200	0.056482	2.93187	0.890334	3.11866	5.69789	1.80851	3.97848	0.0891066
Glyma.02G027400	17.3981	5.47248	17.5083	8.40207	-1.66866	-1.05922	0.00911079	0.618551
Glyma.02G029900	0.030141	0.677239	0.036623	0.495328	4.48987	3.75756	0.281023	-0.45128
Glyma.02G037100	9.82183	21.5412	10.45	33.9376	1.13303	1.69937	0.0894459	0.655788
Glyma.02G037500	6.12162	23.4244	13.3184	43.0217	1.93603	1.69165	1.12143	0.877049
Glyma.02G045100	3.17207	6.49399	12.1597	5.87413	1.03368	-1.04966	1.93862	-0.144729
Glyma.02G070600	0.161397	0.764823	0.212627	0.817398	2.24451	1.94272	0.397709	0.0959122
Glyma.02G072200	0.0450824	42.2494	0.00864549	0.470346	9.87215	5.76563	-2.38254	-6.48907
Glyma.02G072800	5.00101	2.20933	4.83058	1.60054	-1.17861	-1.59364	-0.0500225	-0.465048
Glyma.02G077600	304.18	100.563	757.051	185.863	-1.59683	-2.02616	1.31547	0.886137
Glyma.02G088100	0.495335	6.13961	0	0.743896	3.63167	9.53896	-8.95226	-3.04497
Glyma.02G095700	7.98964	2.34188	9.32891	3.29177	-1.77046	-1.50284	0.223577	0.491197
Glyma.02G098800	2.20067	5.79346	1.14519	3.34199	1.39648	1.54512	-0.942354	-0.793718
Glyma.02G107500	14.2651	31.3201	18.0305	44.5242	1.1346	1.30415	0.337951	0.507502
Glyma.02G109100	1285.63	483.79	1342.71	541.335	-1.41002	-1.31056	0.0626744	0.162139
Glyma.02G114100	71.3345	27.0243	43.432	11.9909	-1.40034	-1.85682	-0.715842	-1.17231
Glyma.02G129300	2.21428	9.13962	2.22907	16.9525	2.04529	2.92699	0.00960359	0.891295
Glyma.02G130400	0.686035	23.5589	1.6236	9.26074	5.10184	2.51193	1.24285	-1.34707
Glyma.02G132500	1.84734	6.21398	0.0143773	11.0713	1.75007	9.58881	-7.00551	0.833235
Glyma.02G134500	0.454729	2.23724	0.727357	2.15078	2.29864	1.56412	0.677658	-0.0568616
Glyma.02G136700	174.027	52.1113	4.09264	34.618	-1.73965	3.08042	-5.41014	-0.590073
Glyma.02G140300	3.5028	1.19378	2.95787	0.58545	-1.55297	-2.33694	-0.243948	-1.02792
Glyma.02G151900	0.296533	3.76851	0.0557153	1.04354	3.66773	4.22726	-2.41205	-1.85252
Glyma.02G156800	51.4292	423.553	6.24579	166.39	3.04188	4.73554	-3.04163	-1.34798
Glyma.02G159200	2.39956	6.44064	1.74497	6.82945	1.42444	1.96856	-0.459564	0.0845638
Glyma.02G195300	2.26476	14.0362	0.986647	8.94792	2.63172	3.18095	-1.19875	-0.649524
Glyma.02G195500	2.44745	5.76492	3.29816	10.1185	1.23602	1.61726	0.430383	0.811625
Glyma.02G198300	0.432104	6.11119	0.25681	2.59409	3.822	3.33646	-0.750678	-1.23623
Glyma.02G208200	5.57007	16.7195	1.27681	24.7082	1.58576	4.27437	-2.12515	0.563461
Glyma.02G210000	0	3.83814	0	0.524745	11.9062	9.03547	0	-2.87072
Glyma.02G210300	0.620168	16.2356	0.413142	15.4074	4.71036	5.22084	-0.586021	-0.0755443
Glyma.02G211600	5.79137	18.4401	8.33793	42.5385	1.67087	2.35101	0.525784	1.20592
Glyma.02G217900	42.9022	17.8468	80.8918	25.0401	-1.26539	-1.69175	0.914942	0.48858
Glyma.02G219700	36.2931	13.9192	0.594353	0.0161933	-1.38262	-5.19785	-5.93223	-9.74747
Glyma.02G221000	13.6876	34.2727	18.8563	52.6429	1.32419	1.48119	0.462183	0.61918
Glyma.02G222800	4.92317	23.1154	1.42989	17.0617	2.2312	3.57679	-1.78369	-0.438093
Glyma.02G232000	1.23652	3.45603	1.44825	4.4695	1.48283	1.6258	0.22802	0.370996
Glyma.02G232500	0.607968	12.6497	0.211015	6.32026	4.37896	4.90457	-1.52665	-1.00105
Glyma.02G234200	1.68937	16.5234	0.485615	1.63472	3.28995	1.75116	-1.7986	-3.33739
Glyma.02G234300	1.1785	3.31655	0.893832	4.53492	1.49273	2.343	-0.398882	0.451392
Glyma.02G235700	2.93274	10.1296	19.7911	5.31014	1.78826	-1.89803	2.75453	-0.931757
Glyma.02G238500	0.316449	2.25767	0.598731	4.3229	2.83479	2.85202	0.919934	0.937167
Glyma.02G255200	28.1846	7.3117	1.15883	7.52811	-1.94663	2.69962	-4.60417	0.042081
Glyma.02G255400	42.8615	20.9043	8.90266	44.6532	-1.03588	2.32646	-2.26737	1.09497
Glyma.02G256000	12.4611	5.0247	2.30872	6.77907	-1.31032	1.554	-2.43227	0.43205
Glyma.02G257300	0.44548	1.10435	0.128039	0.805169	1.30977	2.65271	-1.79877	-0.455839
Glyma.02G257700	0.115629	2.64899	0.0305327	5.76475	4.51786	7.56076	-1.92108	1.12181
Glyma.02G269000	0.465949	2.15487	1.34263	4.88079	2.20936	1.86205	1.52682	1.17951
Glyma.02G275900	63.8444	31.7195	46.1131	22.3626	-1.00919	-1.04409	-0.469382	-0.504279
Glyma.02G279600	8.96028	22.0332	9.45323	29.2666	1.29806	1.63038	0.0772629	0.409579
Glyma.02G288600	1.39074	4.25416	2.63105	5.97234	1.61302	1.18265	0.91979	0.489421
Glyma.02G291800	3.50566	7.6378	3.50236	11.317	1.12347	1.69209	-0.0013576	0.567257
Glyma.02G292100	0.254447	4.46666	0.186048	5.28027	4.13376	4.82687	-0.451693	0.241416
Glyma.02G293900	0.620277	3.27475	0.794997	2.80166	2.4004	1.81726	0.358038	-0.2251
Glyma.02G297700	7.06337	28.7292	8.01162	78.1726	2.02409	3.2865	0.181737	1.44415
Glyma.02G309000	0.741892	2.69349	0.885969	3.5783	1.8602	2.01395	0.256048	0.409799
Glyma.02G310100	0.879832	15.559	0.139112	33.3763	4.14438	7.90644	-2.66098	1.10108
Glyma.03G007700	0	0.3057	0	0.169744	8.25597	7.40721	0	-0.848757
Glyma.03G023900	2.7016	12.1874	5.58297	13.8192	2.17351	1.30757	1.04722	0.181279
Glyma.03G041000	2.26301	10.2957	1.88555	7.97618	2.18573	2.08072	-0.263257	-0.368271
Glyma.03G056800	1.13125	7.13681	0.450512	4.72201	2.65737	3.38976	-1.32828	-0.595878
Glyma.03G057100	1.7636	10.4999	0.643661	12.0356	2.57378	4.22486	-1.45415	0.196926
Glyma.03G068200	2.92494	14.6445	1.00292	10.8762	2.32388	3.4389	-1.5442	-0.429181
Glyma.03G075300	1.94172	6.70542	2.35256	13.0854	1.78799	2.47565	0.276896	0.964557
Glyma.03G078200	5.04232	19.3688	12.9048	62.8912	1.94158	2.28495	1.35575	1.69912
Glyma.03G088800	0.988301	4.16385	1.16187	10.9455	2.0749	3.23581	0.233432	1.39434
Glyma.03G093600	0.976788	2.44395	2.25991	4.6838	1.3231	1.05141	1.21015	0.938464
Glyma.03G096200	0.0600453	5.79661	0.036847	5.43545	6.59301	7.20471	-0.704505	-0.0928099
Glyma.03G098600	66.1308	30.9059	24.8655	68.3225	-1.09744	1.45822	-1.41118	1.14448
Glyma.03G113200	0	4.75521	0.026569	0.342475	12.2153	3.68818	4.73167	-3.79544
Glyma.03G124700	5.49516	12.76	5.8274	19.0896	1.2154	1.71187	0.0846921	0.581157
Glyma.03G132900	0.631991	5.16274	0.304875	1.84806	3.03016	2.59972	-1.05169	-1.48213
Glyma.03G157800	4.24687	14.5421	3.82388	11.8205	1.77577	1.62818	-0.151363	-0.298952
Glyma.03G159000	2.38452	5.61035	1.43128	8.77954	1.23439	2.61684	-0.736393	0.646055
Glyma.03G165800	1.03671	5.4385	0.884511	5.90677	2.39119	2.73942	-0.229063	0.11916
Glyma.03G168900	0.640698	3.07144	0.342561	3.76602	2.2612	3.45861	-0.903284	0.294125
Glyma.03G169200	1.18248	3.06388	2.45434	4.95127	1.37355	1.01246	1.05353	0.692439
Glyma.03G176300	0.121401	11.5046	4.04359	1.1388	6.56629	-1.82812	5.05779	-3.33663
Glyma.03G196300	0.385659	1.66081	0.0437353	0.569375	2.10649	3.70251	-3.14045	-1.54444
Glyma.03G199800	1.83373	4.00185	1.97614	5.53387	1.12588	1.4856	0.107904	0.46762
Glyma.03G204100	1.1886	4.59829	0.0434547	10.1186	1.95183	7.86328	-4.77361	1.13784
Glyma.03G213500	4.10982	17.3388	3.44158	27.882	2.07686	3.01819	-0.256003	0.685327
Glyma.03G215000	0.956004	11.1574	0.499781	3.32341	3.54484	2.7333	-0.93572	-1.74726
Glyma.03G217300	1.54802	5.26337	2.49211	6.17775	1.76556	1.30972	0.686937	0.231096
Glyma.03G218600	0.473392	1.34315	0.437793	1.31686	1.50452	1.58878	-0.112787	-0.0285232
Glyma.03G226200	0.262464	1.41745	0.180644	3.42349	2.43311	4.24425	-0.538968	1.27217
Glyma.03G232400	1.13989	13.1123	1.38241	14.8063	3.52395	3.42096	0.278292	0.175296
Glyma.03G232500	0.284823	3.39186	0.842262	4.80893	3.57394	2.51337	1.5642	0.50364
Glyma.03G236300	15.074	51.3921	3.61983	70.2918	1.76948	4.27936	-2.05807	0.451809
Glyma.03G237900	3.84667	11.7189	22.8953	8.58667	1.60716	-1.41488	2.57337	-0.448672
Glyma.03G241600	0.0485143	1.40049	0.057477	1.29589	4.85138	4.49481	0.244574	-0.111998
Glyma.03G254900	1.57906	8.06911	4.52985	13.2221	2.35335	1.54541	1.5204	0.712466
Glyma.03G261400	0.217597	1.1961	0.256979	1.37879	2.45861	2.42368	0.239992	0.205064
Glyma.04G003300	1.47388	5.23284	2.73604	6.25224	1.82798	1.19228	0.892477	0.256781
Glyma.04G007700	7.89533	21.3196	10.4469	21.9685	1.43311	1.07235	0.404009	0.0432543
Glyma.04G021200	2.0732	5.99808	3.8042	9.22861	1.53264	1.27852	0.875736	0.621613
Glyma.04G023800	1.46465	5.36383	1.07922	5.93265	1.8727	2.45868	-0.440568	0.145414
Glyma.04G026400	0.099114	1.29765	1.44108	9.06202	3.71067	2.65268	3.86192	2.80393
Glyma.04G029600	0.126121	1.84766	0.37958	3.28569	3.87282	3.11372	1.5896	0.830498
Glyma.04G036300	3.54875	8.53059	3.6491	9.28537	1.26533	1.34742	0.0402278	0.122313
Glyma.04G040000	0.616109	2.01633	2.11396	4.92076	1.71048	1.21893	1.77869	1.28715
Glyma.04G043100	0.0435877	2.67669	0.044645	1.91999	5.94039	5.42646	0.0345786	-0.479353
Glyma.04G056100	0.95301	3.55423	0.915903	4.29668	1.89897	2.22996	-0.0572965	0.273685
Glyma.04G069500	1.8586	36.222	0.485313	82.7123	4.28458	7.41304	-1.93723	1.19123
Glyma.04G074000	0.431692	1.37981	0.699711	2.09602	1.67639	1.58283	0.696755	0.603187
Glyma.04G074800	6.13296	1.41207	3.93994	1.09065	-2.11877	-1.85298	-0.63841	-0.37262
Glyma.04G077300	28.8557	73.9368	28.4732	92.9313	1.35743	1.70656	-0.0192542	0.329871
Glyma.04G079300	0.13926	2.18534	0.049937	0.552781	3.972	3.46853	-1.4796	-1.98308
Glyma.04G080300	0.338784	3.9384	0.671275	1.61617	3.53917	1.2676	0.986536	-1.28503
Glyma.04G082800	0.416907	2.79521	0.643855	16.2814	2.74516	4.66034	0.627011	2.54219
Glyma.04G082900	9.19089	36.194	8.677	82.6602	1.97747	3.25193	-0.0830094	1.19144
Glyma.04G086300	0.304725	2.93226	1.03019	2.88093	3.26644	1.48362	1.75733	-0.0254793
Glyma.04G093200	0.236371	1.04393	0.978288	2.68776	2.1429	1.45807	2.0492	1.36438
Glyma.04G098600	11.999	5.24031	3.21399	6.91091	-1.19518	1.10451	-1.90047	0.399223
Glyma.04G099000	0.967412	3.70206	1.01237	2.96097	1.93613	1.54834	0.0655322	-0.32226
Glyma.04G100400	4.53911	10.377	1.40984	19.2789	1.19291	3.77342	-1.68688	0.893629
Glyma.04G108500	0.045305	2.46614	0.266159	2.75153	5.76644	3.36987	2.55455	0.157977
Glyma.04G127100	1.47658	8.26018	0.700738	3.44669	2.48391	2.29826	-1.07531	-1.26096
Glyma.04G149300	0.926475	15.289	0.175391	16.8229	4.0446	6.58371	-2.40118	0.137928
Glyma.04G168300	1.16237	6.18778	12.7382	2.62649	2.41236	-2.27795	3.45402	-1.23628
Glyma.04G174600	0	0.435129	0.0359067	0.613712	8.7653	4.09524	5.16618	0.496117
Glyma.04G182600	0.601545	22.9445	0.444283	5.20982	5.25333	3.55168	-0.437194	-2.13884
Glyma.04G198400	0	1.32649	0.0163313	1.32272	10.3734	6.33972	4.02957	-0.00409993
Glyma.04G208300	23.4539	47.4041	8.4187	65.8499	1.01518	2.96751	-1.47816	0.474169
Glyma.04G209200	1.67324	8.42958	3.1746	9.75875	2.33281	1.62012	0.923926	0.211236
Glyma.04G214700	1.83035	4.30974	1.67986	5.13921	1.23548	1.61321	-0.123783	0.253945
Glyma.04G217600	7.76389	2.67582	36.071	10.1989	-1.5368	-1.82243	2.21599	1.93036
Glyma.04G226100	14.7956	7.2601	16.5709	5.28062	-1.02711	-1.64987	0.163484	-0.459283
Glyma.04G236200	0.735485	2.34556	1.0983	3.13508	1.67317	1.51323	0.578501	0.418569
Glyma.04G238300	0.780554	4.11898	0.431781	4.88008	2.39972	3.49853	-0.854198	0.244619
Glyma.04G244000	0.827335	3.40172	0.255429	1.2122	2.03972	2.24663	-1.69555	-1.48863
Glyma.04G245300	2.20739	8.01807	2.12771	28.8165	1.86091	3.75952	-0.0530384	1.84557
Glyma.04G248700	1.1297	3.85275	0.562934	5.02369	1.76995	3.15771	-1.0049	0.382857
Glyma.04G253900	0.268425	1.17858	0.388268	1.02268	2.13446	1.39724	0.532534	-0.204691
Glyma.05G008200	3.65946	0.483163	4.19837	1.56976	-2.92105	-1.41929	0.198197	1.69996
Glyma.05G010800	1.88618	8.4436	3.2702	10.8273	2.16239	1.72723	0.793912	0.358749
Glyma.05G011200	483.254	180.891	226.962	17.8463	-1.41766	-3.66875	-1.09033	-3.34142
Glyma.05G015400	2.37646	6.42101	2.31061	7.76124	1.43398	1.74801	-0.0405431	0.273486
Glyma.05G020400	0.214096	15.3187	0.203588	19.6817	6.1609	6.59506	-0.0726054	0.361563
Glyma.05G042600	3.62114	1.28375	2.16578	0.55448	-1.49609	-1.96568	-0.741558	-1.21115
Glyma.05G043900	28.0576	13.6075	8.55781	22.1066	-1.04399	1.36916	-1.71308	0.700069
Glyma.05G054600	0.666356	2.04621	0.944795	2.00696	1.61859	1.08694	0.503708	-0.0279446
Glyma.05G055100	9.02882	18.4207	10.1325	23.8307	1.02872	1.23384	0.166376	0.371496
Glyma.05G072300	9.29907	25.4973	13.0479	41.2001	1.45519	1.65883	0.488663	0.692303
Glyma.05G080500	0.028285	0.627267	0.0418153	0.670641	4.47097	4.00344	0.563995	0.0964603
Glyma.05G081900	7.96926	2.83962	0.724204	2.50375	-1.48875	1.78962	-3.45998	-0.181608
Glyma.05G082400	0.375538	6.26588	0.521471	5.70029	4.06048	3.45038	0.473626	-0.13648
Glyma.05G096500	10.5419	24.3638	6.90143	24.3616	1.2086	1.81964	-0.611173	-0.000130535
Glyma.05G101700	54.8111	24.7869	60.3882	14.369	-1.14489	-2.07131	0.139798	-0.786619
Glyma.05G103600	3.67896	25.3382	0.630978	6.81324	2.78394	3.43268	-2.54364	-1.8949
Glyma.05G114000	0.560019	3.90551	0.384422	2.92548	2.80196	2.92791	-0.542784	-0.416837
Glyma.05G119500	4.65023	14.7927	5.65791	21.9984	1.66951	1.95906	0.282966	0.572517
Glyma.05G119600	0.902551	2.77652	0.954535	2.80899	1.6212	1.55718	0.0807903	0.0167728
Glyma.05G132900	4.65997	11.606	6.40823	15.9223	1.31648	1.31305	0.459605	0.456184
Glyma.05G136100	0	1.11225	0.0119193	1.79499	10.1193	7.23453	3.57523	0.690497
Glyma.05G137800	0	5.01214	0	0.912268	12.2912	9.83331	0	-2.4579
Glyma.05G141200	0.0476094	6.00354	0.0551652	6.93832	6.97842	6.97468	0.212512	0.208772
Glyma.05G143500	1.60514	4.47146	1.49711	3.28985	1.47805	1.13584	-0.100515	-0.442724
Glyma.05G155600	7.22544	3.47328	0.485169	2.42114	-1.05679	2.31913	-3.89653	-0.52061
Glyma.05G161900	0.232582	2.59109	0.098626	1.10551	3.47775	3.4866	-1.2377	-1.22884
Glyma.05G169900	25.3278	75.7389	33.843	120.686	1.58031	1.83433	0.418136	0.672155
Glyma.05G174900	1.72354	6.82272	0.614521	14.7587	1.98498	4.58596	-1.48784	1.11315
Glyma.05G178200	2.7496	10.5466	3.33055	21.9869	1.93949	2.72281	0.276541	1.05986
Glyma.05G179900	7.03014	3.14822	9.53719	3.67302	-1.15902	-1.3766	0.440011	0.222428
Glyma.05G186700	0.389437	1.6351	0.215996	4.33183	2.06992	4.3259	-0.850386	1.4056
Glyma.05G195000	7.41531	26.0889	4.29386	31.3497	1.81486	2.8681	-0.788232	0.265014
Glyma.05G196100	4.70735	10.0284	4.84111	12.713	1.0911	1.3929	0.0404216	0.342214
Glyma.05G197000	4.77946	14.6912	4.85019	21.132	1.62004	2.12331	0.0211923	0.52447
Glyma.05G198500	0.555771	1.43546	0.326559	0.803447	1.36895	1.29886	-0.767148	-0.837235
Glyma.05G204600	86.1084	191.404	9.24699	64.3414	1.1524	2.79869	-3.2191	-1.5728
Glyma.05G204800	7.04952	16.2368	2.27687	5.67357	1.20367	1.3172	-1.63047	-1.51694
Glyma.05G209100	2.21773	7.76536	2.33848	5.12838	1.80797	1.13293	0.0764889	-0.598548
Glyma.05G215900	28.1259	62.7426	6.69065	72.4714	1.15755	3.43719	-2.07168	0.207968
Glyma.05G232100	3.72201	1.19151	19.1174	4.59807	-1.64329	-2.05579	2.36073	1.94823
Glyma.05G234600	8.19902	76.2402	3.85631	44.1441	3.21703	3.51693	-1.08823	-0.78833
Glyma.05G237100	0.312817	1.60161	0.193402	1.01345	2.35613	2.3896	-0.693717	-0.660251
Glyma.05G238100	0.215694	2.9701	0.0274889	2.24745	3.78345	6.3533	-2.97207	-0.402224
Glyma.05G242600	0.545828	3.43707	0.485321	4.15698	2.65466	3.09852	-0.169507	0.274355
Glyma.05G245600	12.1087	27.4152	9.88237	41.7878	1.17893	2.08015	-0.293117	0.608105
Glyma.06G007000	6.63172	1.39951	11.55	3.18678	-2.24447	-1.85772	0.80044	1.18718
Glyma.06G019500	0.0545383	1.43007	0.0544887	4.00819	4.71267	6.20085	-0.00131441	1.48687
Glyma.06G024000	4.09651	11.6437	2.82425	13.5878	1.50708	2.26637	-0.536529	0.222764
Glyma.06G057300	0.0616577	1.80684	0.115718	1.81897	4.87304	3.97444	0.908257	0.00965406
Glyma.06G061900	0.288189	2.7873	0.355968	2.6003	3.27378	2.86886	0.304729	-0.100191
Glyma.06G062000	0	1.24475	0	0.452176	10.2816	8.82074	0	-1.46089
Glyma.06G067000	1.21598	7.2063	3.74303	11.8622	2.56714	1.66409	1.62209	0.719041
Glyma.06G067900	1.1049	3.60378	12.319	5.58247	1.7056	-1.14191	3.4789	0.631394
Glyma.06G069100	114.396	47.9385	21.1057	58.426	-1.25478	1.46898	-2.43833	0.285426
Glyma.06G084300	7.37535	15.8879	5.73033	16.2937	1.10714	1.50762	-0.364094	0.0363853
Glyma.06G087800	1.5148	11.6364	1.12044	11.1215	2.94144	3.31122	-0.435062	-0.0652854
Glyma.06G088300	1.52909	14.0395	2.75067	12.6516	3.19874	2.20146	0.847108	-0.150176
Glyma.06G093400	0.111654	0.55881	0.0446253	0.576369	2.32332	3.69106	-1.3231	0.044634
Glyma.06G097300	4.33876	10.7396	20.1675	7.08001	1.30759	-1.51021	2.21668	-0.601124
Glyma.06G099700	12.2217	3.16977	7.28204	23.1299	-1.94699	1.66734	-0.747026	2.8673
Glyma.06G100900	0.55443	3.00665	0.551995	3.14456	2.43908	2.51013	-0.00634839	0.064701
Glyma.06G108100	11.5805	27.8575	13.3673	44.8677	1.26637	1.74697	0.207005	0.687611
Glyma.06G110700	0.014683	0.396398	0	0.457202	4.75473	8.83669	-3.87607	0.205881
Glyma.06G114200	5.27414	16.429	1.78898	21.8518	1.63923	3.61054	-1.5598	0.411511
Glyma.06G117900	2.06141	5.71403	2.17759	8.603	1.47088	1.98211	0.0791003	0.590331
Glyma.06G125600	1.33874	5.25527	0.777759	6.02776	1.97289	2.95423	-0.783477	0.197859
Glyma.06G129800	3.5781	8.38352	2.3647	8.93011	1.22836	1.91702	-0.597537	0.0911225
Glyma.06G144000	2.63299	5.83103	2.13658	6.99354	1.14705	1.71072	-0.301402	0.262272
Glyma.06G147100	0.232144	2.18843	0.150109	1.2733	3.2368	3.08449	-0.629015	-0.781326
Glyma.06G154700	3.42805	11.9431	2.09103	8.48174	1.80072	2.02014	-0.713171	-0.493744
Glyma.06G170300	11.4364	27.9067	2.43721	51.3857	1.28698	4.39806	-2.23033	0.880755
Glyma.06G182700	0.210264	79.1795	0.786521	6.93736	8.55678	3.14083	1.90328	-3.51267
Glyma.06G184200	1.75106	7.72205	1.83852	7.29455	2.14075	1.98827	0.0703146	-0.0821655
Glyma.06G186200	3.72711	12.8964	2.16274	9.26014	1.79084	2.09817	-0.785198	-0.477861
Glyma.06G187200	13.9569	33.0371	2.17111	6.99562	1.24311	1.68802	-2.68448	-2.23956
Glyma.06G190100	0.430974	4.12868	0.589372	9.10288	3.26001	3.94907	0.451577	1.14064
Glyma.06G195600	5.3963	12.7083	1.19719	3.01962	1.23573	1.33471	-2.17232	-2.07333
Glyma.06G254900	3.68174	7.70148	2.3368	14.5831	1.06475	2.64169	-0.655853	0.921087
Glyma.06G259800	12.0015	28.8683	4.83351	25.5637	1.26628	2.40295	-1.31207	-0.17539
Glyma.06G260100	14.3861	34.0156	5.71948	54.6034	1.24152	3.25503	-1.33072	0.682795
Glyma.06G265100	8.72107	32.8134	16.0581	45.9089	1.91171	1.51547	0.880729	0.484485
Glyma.06G275900	1.19414	3.67863	0.0986883	4.43669	1.6232	5.49046	-3.59695	0.270315
Glyma.06G282500	2.45776	14.1289	24.3459	7.60247	2.52324	-1.67914	3.30827	-0.894109
Glyma.06G291900	0.373067	11.018	0	12.1669	4.88428	13.5707	-8.54329	0.143105
Glyma.06G299900	1.22492	7.76177	0.375629	10.1601	2.6637	4.75747	-1.70531	0.38846
Glyma.06G300100	2.98861	13.189	0.55386	35.4997	2.1418	6.00214	-2.43188	1.42847
Glyma.06G302200	0	0.305382	0.420713	2.72278	8.25447	2.69417	8.71669	3.15639
Glyma.06G307100	1.43682	9.02362	3.22485	12.1655	2.65083	1.9155	1.16635	0.431022
Glyma.06G307700	0.313727	1.25076	0.378218	1.71215	1.99522	2.17852	0.26971	0.453005
Glyma.06G310100	48.5917	163.114	74.4821	199.866	1.7471	1.42407	0.616184	0.29315
Glyma.06G318400	0.474116	1.86071	0.484453	2.4543	1.97254	2.34088	0.0311143	0.399457
Glyma.06G319500	0.322442	1.34384	0.422311	1.88691	2.05925	2.15965	0.389263	0.489665
Glyma.07G005200	0.977596	2.85184	0.857672	2.27128	1.54458	1.40501	-0.188812	-0.328386
Glyma.07G005900	0.174507	1.01825	0.155966	1.30074	2.54473	3.06004	-0.162054	0.353249
Glyma.07G012100	1.06719	2.71351	0.719489	2.03211	1.34634	1.49793	-0.568776	-0.417181
Glyma.07G013500	0.781169	3.77949	1.6022	7.348	2.27449	2.1973	1.03635	0.959161
Glyma.07G020400	1.15846	4.48557	12.9187	4.25589	1.95308	-1.60193	3.47918	-0.0758312
Glyma.07G023000	6.51977	3.05829	1.05157	4.03696	-1.09209	1.94073	-2.63228	0.400544
Glyma.07G023300	8.24826	19.4828	0.527533	30.0441	1.24004	5.83168	-3.96676	0.624885
Glyma.07G023700	2.8852	6.57493	7.70522	16.8774	1.1883	1.13118	1.41716	1.36004
Glyma.07G026900	0	0.377008	0.0735547	1.40632	8.55845	4.25696	6.20074	1.89926
Glyma.07G027200	0.657424	3.88286	2.32917	7.20221	2.56222	1.62862	1.82492	0.891323
Glyma.07G027400	2.44944	8.4742	3.21192	8.39263	1.79063	1.38569	0.390984	-0.0139532
Glyma.07G035200	3.48345	7.96043	1.60019	12.1123	1.19233	2.92016	-1.12227	0.605555
Glyma.07G039800	4.57908	15.9445	5.63039	13.1256	1.79993	1.22108	0.298176	-0.280674
Glyma.07G041400	21.6396	74.0925	17.0698	120.408	1.77565	2.81841	-0.342225	0.700536
Glyma.07G043000	80.5407	25.5426	9.09772	25.8147	-1.65681	1.50462	-3.14614	0.015286
Glyma.07G049400	17.9561	36.5682	75.7638	34.5166	1.02611	-1.13422	2.07703	-0.0832987
Glyma.07G051200	0	0.66517	0.020632	0.589448	9.37758	4.83641	4.36681	-0.174359
Glyma.07G055300	0.564391	2.56412	0.779027	3.54947	2.1837	2.18786	0.464977	0.469137
Glyma.07G071300	0.462019	2.22058	0.418424	4.54837	2.26491	3.44231	-0.142988	1.03442
Glyma.07G089400	4.83009	17.7828	7.17585	24.0993	1.88036	1.74777	0.5711	0.438505
Glyma.07G090400	0.554078	3.75491	0.118205	4.76942	2.76062	5.33445	-2.22879	0.345033
Glyma.07G094500	2.6287	8.93027	3.81949	19.07	1.76435	2.31985	0.53903	1.09453
Glyma.07G095000	3.46802	10.0794	3.61679	23.1149	1.53923	2.67604	0.0605978	1.1974
Glyma.07G095200	0.474659	3.6776	1.41805	3.09742	2.9538	1.12716	1.57895	-0.247695
Glyma.07G095900	6.04967	15.8685	4.84478	25.7607	1.39124	2.41067	-0.320426	0.699005
Glyma.07G096100	3.45361	7.16845	3.26288	11.6915	1.05356	1.84124	-0.0819576	0.705725
Glyma.07G097000	0.810579	29.3471	2.09967	12.5997	5.17812	2.58516	1.37313	-1.21982
Glyma.07G097700	83.6424	33.3053	50.1787	23.2675	-1.32848	-1.10876	-0.737158	-0.517432
Glyma.07G108900	1.82518	4.36871	3.02741	7.94735	1.25917	1.39239	0.73005	0.863266
Glyma.07G125600	37.231	8.73779	2.24242	10.8055	-2.09116	2.26864	-4.05338	0.306432
Glyma.07G136800	4.69467	15.5616	1.85873	6.29488	1.72889	1.75986	-1.33671	-1.30574
Glyma.07G144200	0.786797	4.40512	0.224121	1.30504	2.48512	2.54174	-1.81171	-1.75509
Glyma.07G147100	1.48771	5.20254	2.28729	6.33884	1.80612	1.47058	0.620546	0.285004
Glyma.07G150900	2.47784	29.7945	2.50071	19.5859	3.58789	2.96941	0.013253	-0.605234
Glyma.07G151300	19.1223	88.3286	6.63501	141.786	2.20762	4.41747	-1.52709	0.68276
Glyma.07G153800	0.634205	5.54155	0.119795	4.8274	3.12727	5.33261	-2.40438	-0.199042
Glyma.07G162900	8.81304	4.21268	12.8471	34.4204	-1.0649	1.42182	0.543731	3.03045
Glyma.07G163200	2.63709	10.5874	0.559434	13.959	2.00532	4.64108	-2.23691	0.398849
Glyma.07G171600	1.16291	3.82741	0.759125	6.25581	1.71863	3.04279	-0.61533	0.70883
Glyma.07G183900	0.303077	1.20426	0.211706	2.02037	1.99039	3.25449	-0.517624	0.746476
Glyma.07G188800	0.394119	4.14257	0.0553967	2.24444	3.39382	5.34041	-2.83076	-0.884169
Glyma.07G189400	11.5966	28.0753	17.143	35.4094	1.2756	1.04652	0.563921	0.334834
Glyma.07G189500	2.0221	8.44529	1.8879	6.38343	2.0623	1.75755	-0.0990694	-0.403815
Glyma.07G190100	9.58527	29.36	4.68682	35.9069	1.61496	2.93758	-1.03221	0.290409
Glyma.07G196800	1.33322	5.08498	0.477031	5.45993	1.93133	3.51673	-1.48276	0.102639
Glyma.07G199500	1.4437	4.04975	0.742723	3.30329	1.48806	2.15301	-0.958876	-0.293927
Glyma.07G199800	1.30573	8.39139	0.280208	11.9314	2.68405	5.41212	-2.22028	0.507778
Glyma.07G208700	172.386	56.0858	6.90355	49.8096	-1.61994	2.85101	-4.64216	-0.171212
Glyma.07G215600	0.804476	2.07906	1.0076	5.08584	1.36981	2.33557	0.324795	1.29056
Glyma.07G243900	62.5853	218.774	11.8308	96.2005	1.80555	3.02349	-2.40327	-1.18533
Glyma.07G266200	2.22295	5.93382	1.24466	3.33309	1.41649	1.42111	-0.836725	-0.832099
Glyma.07G268400	1.76109	8.84005	1.39979	14.9357	2.32758	3.41548	-0.331255	0.756642
Glyma.08G002100	9.58889	23.3815	7.51286	32.7882	1.28593	2.12574	-0.352001	0.487806
Glyma.08G010400	0.832728	3.17685	0.604267	3.01498	1.93168	2.31889	-0.462659	-0.0754504
Glyma.08G011300	0.21245	21.2779	0.035181	0.73258	6.64609	4.38012	-2.59426	-4.86022
Glyma.08G021900	24.0906	55.1733	6.28807	71.3294	1.1955	3.50381	-1.93778	0.370526
Glyma.08G042100	5.50919	68.9857	2.13966	22.0377	3.64639	3.36452	-1.36446	-1.64632
Glyma.08G044400	14.5569	30.1419	6.80169	45.5069	1.05007	2.74212	-1.09773	0.594311
Glyma.08G050400	0.0389037	85.2335	0	4.92129	11.0973	12.2648	-5.28183	-4.11431
Glyma.08G058900	1.23197	13.7534	2.65178	11.0725	3.48074	2.06194	1.10599	-0.312812
Glyma.08G064700	2.94223	11.3955	1.40571	13.4124	1.95349	3.2542	-1.0656	0.235106
Glyma.08G071300	12.7006	34.3712	19.1136	42.4523	1.43631	1.15124	0.589709	0.304642
Glyma.08G072400	3.08237	7.57383	2.71874	5.57993	1.29698	1.03731	-0.181105	-0.440776
Glyma.08G074100	4.02435	13.1768	5.32894	13.8312	1.71117	1.376	0.405091	0.0699239
Glyma.08G074200	96.979	40.5369	9.26786	49.9262	-1.25844	2.42949	-3.38736	0.300561
Glyma.08G091900	5.61229	23.2231	6.97179	19.8839	2.0489	1.512	0.31294	-0.223965
Glyma.08G096500	0.218962	6.04325	0.98678	20.621	4.78657	4.38524	2.17205	1.77072
Glyma.08G104600	25.912	53.0227	13.4126	62.0367	1.03299	2.20953	-0.950026	0.22651
Glyma.08G109300	0.503679	6.93751	0.939169	4.41721	3.78384	2.23368	0.898881	-0.651283
Glyma.08G109500	1.57366	12.4029	1.48757	9.51455	2.97849	2.67718	-0.0811632	-0.382475
Glyma.08G115900	0	0.652036	0.025424	0.593545	9.34881	4.54509	4.66812	-0.135593
Glyma.08G118700	20.5645	76.4088	11.6978	24.1775	1.89359	1.04743	-0.813911	-1.66007
Glyma.08G130800	2.76322	8.01186	2.23828	13.2574	1.53579	2.56634	-0.303963	0.726594
Glyma.08G135200	1.8327	10.2928	1.84797	23.2572	2.48958	3.65366	0.0119694	1.17605
Glyma.08G136200	30.6736	109.524	56.3559	177.14	1.83617	1.65225	0.877568	0.693649
Glyma.08G137500	0.355652	1.14258	1.39306	4.34714	1.68375	1.64181	1.96971	1.92778
Glyma.08G141900	1.33447	5.99722	1.50598	4.32451	2.16802	1.52184	0.174428	-0.471757
Glyma.08G142400	12.2865	46.8923	8.15086	35.63	1.93227	2.12807	-0.592054	-0.396259
Glyma.08G153700	16.231	82.407	37.3078	120.366	2.34402	1.68987	1.20073	0.546584
Glyma.08G164400	60.4435	21.0239	57.0646	20.1375	-1.52356	-1.50271	-0.0829905	-0.0621482
Glyma.08G171400	1.61899	9.24988	2.41233	25.8504	2.51434	3.42169	0.575335	1.48268
Glyma.08G174700	348.686	108.994	32.3631	71.3615	-1.67768	1.1408	-3.4295	-0.61103
Glyma.08G177300	0.593011	2.31679	0.527829	2.35449	1.966	2.15727	-0.16799	0.023282
Glyma.08G178200	3.50231	1.70042	6.66589	1.93569	-1.04242	-1.78395	0.928493	0.186961
Glyma.08G181000	1.39138	4.75227	0.300121	5.75069	1.7721	4.26012	-2.2129	0.275119
Glyma.08G197500	0.304744	5.27628	0.789645	16.8967	4.11385	4.41939	1.37361	1.67915
Glyma.08G199800	0.646854	3.98176	1.69014	10.8667	2.62189	2.6847	1.38563	1.44843
Glyma.08G200000	0.106047	1.07032	0.331298	5.94198	3.33526	4.16474	1.64342	2.47291
Glyma.08G200100	988.146	2125.25	22.6062	671.763	1.10484	4.89316	-5.44993	-1.66161
Glyma.08G203800	15.2507	152.471	5.92107	14.3944	3.32159	1.28158	-1.36495	-3.40496
Glyma.08G212900	0.886351	6.18726	0.7019	11.8694	2.80335	4.07984	-0.336612	0.939877
Glyma.08G218800	11.9243	5.19942	1.92148	5.99213	-1.19749	1.64085	-2.63362	0.204718
Glyma.08G221300	9.26189	4.03399	10.7798	3.5711	-1.1991	-1.59389	0.218953	-0.175841
Glyma.08G221600	0.270853	4.12917	12.4769	2.5492	3.93027	-2.29115	5.52561	-0.695807
Glyma.08G230600	423.332	164.92	230.332	54.5481	-1.36003	-2.07812	-0.878072	-1.59616
Glyma.08G249900	8.94755	32.5893	10.3297	23.0175	1.86483	1.15593	0.207234	-0.50167
Glyma.08G256600	0.0688243	1.08775	0.062548	2.08041	3.98228	5.05576	-0.137955	0.935528
Glyma.08G292000	4.73261	19.973	5.75235	30.9127	2.07735	2.42597	0.281516	0.630145
Glyma.08G299900	8.90918	3.74976	1.03965	6.63096	-1.24849	2.67311	-3.09919	0.822419
Glyma.08G303700	2.69257	6.20064	1.18551	8.57773	1.20343	2.85509	-1.18348	0.468177
Glyma.08G316500	13.5778	37.6022	11.5545	44.5711	1.46957	1.94766	-0.232793	0.245294
Glyma.08G321400	2.12031	10.1043	0.809908	6.37386	2.25263	2.97634	-1.38844	-0.664735
Glyma.08G328600	52.8312	19.7208	12.2623	4.17907	-1.42167	-1.55298	-2.10716	-2.23847
Glyma.08G336100	20.1328	7.07227	2.01145	6.71525	-1.5093	1.73921	-3.32324	-0.0747311
Glyma.08G342000	84.9845	251.612	20.5107	121.249	1.56593	2.56352	-2.05082	-1.05323
Glyma.08G351800	3.30895	9.73397	0.592946	3.26823	1.55665	2.46254	-2.4804	-1.57452
Glyma.09G003300	3.06745	6.36663	0.941064	6.72581	1.05349	2.83734	-1.70468	0.0791775
Glyma.09G008200	0.739633	2.88401	0.93143	3.81937	1.9632	2.03582	0.332637	0.405257
Glyma.09G034300	1.29435	5.2233	1.23908	2.93637	2.01274	1.24477	-0.062956	-0.830927
Glyma.09G040400	1.91324	107.617	1.05585	37.3478	5.81374	5.14455	-0.857621	-1.5268
Glyma.09G040600	26.2304	169.165	54.154	154.704	2.68912	1.51437	1.04583	-0.128923
Glyma.09G041900	0.299359	4.09592	0.342742	5.4965	3.77424	4.00332	0.195247	0.424325
Glyma.09G042500	0.679023	2.69281	0.659734	3.77205	1.98758	2.51539	-0.0415774	0.486237
Glyma.09G053400	0.306021	0.910208	0.162464	0.869948	1.57256	2.42081	-0.913509	-0.0652666
Glyma.09G054100	0.194308	0.7588	0.479979	1.97739	1.96538	2.04256	1.30463	1.38181
Glyma.09G054900	1.47575	4.73671	2.55425	7.11201	1.68243	1.47736	0.79145	0.586373
Glyma.09G055700	0.910912	3.00446	0.618033	2.16815	1.72172	1.81071	-0.559628	-0.470642
Glyma.09G060200	1.71595	15.0917	1.7332	23.4349	3.13667	3.75715	0.0144323	0.634905
Glyma.09G060700	0.784521	7.01918	0.464874	18.9221	3.16142	5.34709	-0.754973	1.43069
Glyma.09G063300	1.44373	16.4466	1.64675	8.02078	3.50991	2.28412	0.189823	-1.03597
Glyma.09G071600	53.2933	132.344	25.7993	278.193	1.31227	3.43068	-1.04662	1.07179
Glyma.09G072000	37.3397	11.4028	7.51954	33.3718	-1.71132	2.14991	-2.31199	1.54924
Glyma.09G095800	2.86809	1.17108	3.55569	1.33097	-1.29225	-1.41765	0.310035	0.184644
Glyma.09G099200	0.158488	1.10509	0.139967	3.57691	2.80172	4.67556	-0.179293	1.69455
Glyma.09G107100	6.61575	32.3177	4.21546	39.2385	2.28835	3.21851	-0.650216	0.279947
Glyma.09G115800	2.14372	6.77648	1.99468	6.30232	1.66042	1.65972	-0.103957	-0.104652
Glyma.09G118800	1.30296	8.32689	3.19531	6.46058	2.67599	1.01571	1.29417	-0.366115
Glyma.09G124700	0	0.673461	0.207754	1.11773	9.39545	2.42762	7.69873	0.730903
Glyma.09G142900	3.69563	16.2719	9.15944	28.2553	2.13849	1.62519	1.30944	0.796136
Glyma.09G151400	0.0874887	0.658109	0.166396	1.15636	2.91116	2.7969	0.927454	0.813192
Glyma.09G160100	1.15142	3.35776	0.220167	0.952109	1.54409	2.11253	-2.38674	-1.8183
Glyma.09G161100	0.636154	2.15003	0.399275	2.19603	1.75691	2.45944	-0.671992	0.0305368
Glyma.09G163900	8.51024	203.09	0.646285	114.764	4.57678	7.47228	-3.71896	-0.823451
Glyma.09G164100	1.27772	6.0384	1.13141	4.73951	2.24059	2.06662	-0.17545	-0.349426
Glyma.09G168700	1.26085	2.90849	1.85757	3.7465	1.20587	1.01213	0.559016	0.365271
Glyma.09G180300	145.346	66.6385	117.453	58.3925	-1.12506	-1.00822	-0.307408	-0.190573
Glyma.09G181100	0.260018	1.41237	0.0463093	1.51509	2.44143	5.03196	-2.48923	0.101288
Glyma.09G181400	4.11336	15.4147	2.26312	27.156	1.90592	3.58489	-0.862002	0.816966
Glyma.09G181600	8.34964	29.0082	8.50226	41.942	1.79668	2.30248	0.0261313	0.531933
Glyma.09G189700	16.5	35.1864	10.1659	44.6346	1.09255	2.13442	-0.698732	0.343143
Glyma.09G194800	0.202087	0.932375	0.685385	3.48596	2.20594	2.34657	1.76194	1.90257
Glyma.09G196000	5.3234	16.5548	3.64817	34.6709	1.63683	3.24848	-0.545178	1.06648
Glyma.09G196400	1.30484	4.02547	1.85772	5.60296	1.62528	1.59265	0.509657	0.47703
Glyma.09G207400	1.16899	7.70483	0.884245	9.9249	2.7205	3.48854	-0.402744	0.365291
Glyma.09G218600	1.21926	5.58196	0.334391	7.036	2.19476	4.39515	-1.8664	0.333983
Glyma.09G225400	4.00186	8.93649	1.97451	7.00736	1.15904	1.82737	-1.01918	-0.350838
Glyma.09G229300	1.07031	5.9922	0.747111	6.30788	2.48505	3.07776	-0.518635	0.0740697
Glyma.09G235200	0.238942	0.715125	0.23301	1.89581	1.58154	3.02435	-0.0362669	1.40654
Glyma.09G236500	12.3074	25.2011	9.32758	20.4125	1.03396	1.12988	-0.399949	-0.304036
Glyma.09G238100	9.58982	35.9014	3.90257	71.2514	1.90447	4.19042	-1.29708	0.988877
Glyma.09G241800	4.41345	2.05769	6.24246	0.808625	-1.10089	-2.94857	0.500206	-1.34748
Glyma.09G242900	2.58688	1.2524	3.93701	1.66336	-1.04652	-1.243	0.605886	0.409402
Glyma.09G251500	0.063163	0.580127	0.0702179	1.09502	3.19922	3.96298	0.152759	0.916521
Glyma.09G253200	1.2399	3.17655	0.549095	4.31821	1.35723	2.9753	-1.1751	0.442971
Glyma.09G273400	0.486322	2.17603	1.32062	4.64232	2.16171	1.81363	1.44123	1.09315
Glyma.09G275100	2.62082	7.5458	2.50113	10.3748	1.52566	2.05244	-0.0674374	0.459341
Glyma.09G277500	1.4454	0.523466	2.76865	0.490684	-1.4653	-2.49632	0.937719	-0.0933016
Glyma.09G283400	64.0377	20.3989	3.23542	13.8709	-1.65043	2.10004	-4.30689	-0.556427
Glyma.10G002200	5.28413	17.9464	4.54043	17.1097	1.76396	1.91391	-0.218836	-0.0688788
Glyma.10G007100	0.462049	39.5526	0.0483663	3.92729	6.41958	6.34339	-3.25597	-3.33217
Glyma.10G010100	21.1272	58.8417	12.2064	43.7045	1.47774	1.84015	-0.791463	-0.429055
Glyma.10G018800	0.980675	2.39701	1.52196	3.16879	1.28939	1.058	0.634085	0.402697
Glyma.10G025500	1.58892	11.6407	1.08675	5.31446	2.87306	2.2899	-0.54802	-1.13118
Glyma.10G041400	5.01837	14.3801	4.89244	13.4738	1.51878	1.46153	-0.0366635	-0.0939151
Glyma.10G072000	2.76693	13.3249	33.1241	9.0848	2.26777	-1.86636	3.58152	-0.5526
Glyma.10G090700	0.169985	5.07903	0.197329	10.6951	4.90107	5.7602	0.21519	1.07432
Glyma.10G106600	1.16595	10.7411	0.622037	8.69179	3.20356	3.80458	-0.90643	-0.305411
Glyma.10G111200	0.0856967	0.583967	0.19201	0.755224	2.76858	1.97573	1.16387	0.371019
Glyma.10G144200	4.63745	1.61592	5.87267	2.28413	-1.52098	-1.36237	0.340685	0.499288
Glyma.10G145300	1.25207	3.463	0.942007	3.19667	1.46771	1.76276	-0.410505	-0.115452
Glyma.10G148700	0.388209	3.02147	0.253639	4.27323	2.96035	4.07448	-0.614058	0.500078
Glyma.10G150400	1.66233	10.2738	1.26245	3.89348	2.6277	1.62484	-0.396981	-1.39984
Glyma.10G154400	2.0851	6.42629	3.04153	6.86395	1.62387	1.17424	0.544679	0.0950519
Glyma.10G169300	15.8659	42.1639	11.0972	88.8141	1.41008	3.0006	-0.515742	1.07478
Glyma.10G172600	0.271546	1.52373	0.163776	0.608616	2.48833	1.89381	-0.729475	-1.324
Glyma.10G172700	2.45454	15.223	1.21244	13.5468	2.63273	3.48197	-1.01754	-0.168298
Glyma.10G178400	1.31548	8.88103	1.53258	13.3118	2.75514	3.11867	0.220374	0.583904
Glyma.10G180800	1.96867	6.86415	0.699225	4.30496	1.80186	2.62217	-1.49339	-0.673082
Glyma.10G200700	5.85404	16.8988	3.47727	24.5226	1.52941	2.81808	-0.751478	0.537192
Glyma.10G213500	0.648266	8.90023	0.27758	5.27748	3.77919	4.24888	-1.22368	-0.753993
Glyma.10G230000	9.61947	21.8093	6.62862	32.7924	1.18092	2.30658	-0.537249	0.588416
Glyma.10G236500	0.0203942	1.0304	0.157136	0.797496	5.65891	2.34346	2.94579	-0.36966
Glyma.10G239400	1.91861	0.630184	1.12289	2.70172	-1.60621	1.26667	-0.772849	2.10003
Glyma.10G244600	0.160092	0.700632	0.150397	0.650903	2.12976	2.11366	-0.0901192	-0.106213
Glyma.10G253100	1.14098	7.53602	0.433803	8.01234	2.72353	4.20711	-1.39516	0.088421
Glyma.10G253300	1.36358	4.57844	0.693487	8.53752	1.74745	3.62188	-0.975461	0.898961
Glyma.10G261600	0.0155723	0.351064	0.0661417	0.334652	4.49468	2.33903	2.08657	-0.0690696
Glyma.10G272000	4.41939	14.9862	2.12568	17.1575	1.76172	3.01285	-1.05592	0.195206
Glyma.10G273200	0.878382	4.31964	0.336166	8.06116	2.29799	4.58374	-1.38567	0.900076
Glyma.10G284700	0.0122397	0.605848	0.45992	1.40883	5.62932	1.61504	5.23175	1.21747
Glyma.10G295200	0.931077	4.34132	1.5584	5.48368	2.22116	1.81508	0.743097	0.337012
Glyma.10G295300	0.0454133	10.8805	0.100367	4.27934	7.90442	5.41403	1.1441	-1.34629
Glyma.11G003500	2.25823	72.3452	1.0444	106.795	5.00163	6.67603	-1.11252	0.561879
Glyma.11G014200	1.22683	7.6662	1.32092	7.92385	2.64357	2.58466	0.106602	0.0476897
Glyma.11G021500	0.105919	1.97681	0.0499173	1.23535	4.22214	4.62923	-1.08535	-0.678259
Glyma.11G022800	0.813665	2.20644	0.235937	1.65461	1.43921	2.81001	-1.78603	-0.415233
Glyma.11G030900	3.56911	15.6089	2.86794	19.4761	2.12873	2.76362	-0.315552	0.319332
Glyma.11G038500	1.27862	2.9728	2.45082	6.2399	1.21723	1.34826	0.938678	1.0697
Glyma.11G038600	18.3889	64.5025	8.65798	148.502	1.81052	4.10031	-1.08673	1.20306
Glyma.11G043000	1.22459	6.30802	0.816774	5.14688	2.36489	2.65569	-0.584289	-0.293488
Glyma.11G043700	2.77674	23.9124	0.231975	32.9352	3.10629	7.14952	-3.58135	0.461872
Glyma.11G046200	1.16781	4.75563	1.03721	7.52434	2.02583	2.85885	-0.171092	0.661931
Glyma.11G046400	2.30123	36.0771	0.622467	24.7645	3.9706	5.31413	-1.88634	-0.542813
Glyma.11G048300	13.8008	48.7956	5.45658	90.8874	1.822	4.05801	-1.33869	0.89733
Glyma.11G051300	1.01157	5.71006	3.6242	18.1252	2.4969	2.32226	1.84106	1.66642
Glyma.11G051800	8.9222	101.83	17.272	43.3123	3.51261	1.32634	0.952963	-1.23331
Glyma.11G053400	12.9944	34.112	4.89869	50.8963	1.39239	3.37709	-1.40742	0.577282
Glyma.11G059200	1.79442	5.93907	2.36673	11.1005	1.72672	2.22966	0.399375	0.902317
Glyma.11G077700	2.55439	10.046	1.90424	9.75867	1.97558	2.35747	-0.423764	-0.0418707
Glyma.11G085400	2.62348	7.42487	0.791848	10.987	1.50088	3.79443	-1.72819	0.565364
Glyma.11G089200	3.31408	1.38825	7.52642	1.03999	-1.25534	-2.8554	1.18336	-0.416697
Glyma.11G093100	55.3717	16.2412	3.86106	9.4719	-1.76949	1.29465	-3.84208	-0.777933
Glyma.11G096600	7.99823	23.2222	4.3165	28.8401	1.53775	2.74014	-0.889817	0.312572
Glyma.11G096700	8.26399	33.1531	1.40239	50.5724	2.00423	5.17239	-2.55895	0.609207
Glyma.11G097300	0.16036	3.10237	0.17828	5.32768	4.27398	4.90129	0.152828	0.780133
Glyma.11G097500	2.05405	7.7389	2.73065	7.12376	1.91366	1.38339	0.410776	-0.11949
Glyma.11G111700	3.03587	7.78175	2.4561	5.98983	1.35799	1.28614	-0.305738	-0.377581
Glyma.11G119000	0.250979	1.79846	0.15757	2.109	2.84113	3.74249	-0.671571	0.22979
Glyma.11G120200	0.239149	1.95344	0.260989	1.14551	3.03004	2.13393	0.126077	-0.770028
Glyma.11G123300	214.871	53.3968	16.408	35.6159	-2.00865	1.11812	-3.711	-0.58423
Glyma.11G124700	3.73	29.7902	1.4416	26.7124	2.99759	4.21177	-1.3715	-0.157325
Glyma.11G129900	1.65798	22.5075	0.628691	15.1305	3.76291	4.58896	-1.399	-0.572951
Glyma.11G150300	5.12377	14.6437	6.36468	17.2104	1.515	1.43512	0.312884	0.233005
Glyma.11G150400	20.4735	48.412	8.57939	62.863	1.2416	2.87326	-1.25481	0.376846
Glyma.11G151800	1.62333	5.25737	1.26821	6.50546	1.69538	2.35885	-0.356161	0.30731
Glyma.11G152400	3.3676	7.43432	4.44106	10.3619	1.14248	1.22232	0.399183	0.479022
Glyma.11G153000	0.666785	1.71138	0.329224	2.41469	1.35987	2.87469	-1.01815	0.496677
Glyma.11G169800	0.597859	1.6109	0.616051	1.63783	1.42999	1.41066	0.0432449	0.023915
Glyma.11G176500	5.67663	12.7147	5.85403	31.8791	1.16339	2.44511	0.0443968	1.32612
Glyma.11G180800	91.3168	32.4846	21.7561	8.13676	-1.49112	-1.41889	-2.06946	-1.99723
Glyma.11G181200	7.79641	22.1827	1.7831	25.1196	1.50855	3.81635	-2.12842	0.17938
Glyma.11G182000	1.37575	5.39016	0.527475	4.88565	1.97011	3.21138	-1.38304	-0.141778
Glyma.11G190200	23.8234	70.6992	38.9744	104.608	1.56931	1.42439	0.710146	0.565221
Glyma.11G190900	4.46948	12.8182	7.0754	27.5387	1.52002	1.96058	0.662703	1.10326
Glyma.11G192900	38.19	15.735	9.84928	20.6437	-1.27922	1.06761	-1.9551	0.391732
Glyma.11G197300	0.00878	1.98638	0.0351577	1.76087	7.82171	5.64631	2.00155	-0.173851
Glyma.11G198300	10.3699	24.8905	2.56261	26.3806	1.26319	3.36379	-2.01672	0.0838819
Glyma.11G202000	5.25984	14.6201	4.39627	16.3318	1.47486	1.89333	-0.25874	0.159728
Glyma.11G204700	1.61882	5.97916	0.529528	2.83551	1.885	2.42083	-1.61216	-1.07634
Glyma.11G212100	1.10657	17.1796	0.997054	19.8214	3.95653	4.31324	-0.15035	0.206362
Glyma.11G218900	1.31434	5.66529	1.01853	4.08215	2.10782	2.00284	-0.367841	-0.472822
Glyma.11G219000	0	6.41738	0	0.259717	12.6478	8.0208	0	-4.62697
Glyma.11G220500	1.11343	2.50767	1.44621	4.30471	1.17134	1.57364	0.377267	0.779572
Glyma.11G220900	1.04	3.93797	5.19026	12.6733	1.92087	1.28792	2.31922	1.68628
Glyma.11G233100	6.17093	20.1899	9.00274	23.4072	1.71007	1.37851	0.544877	0.213317
Glyma.11G233900	2.71282	8.58872	2.31395	9.9581	1.66265	2.10551	-0.229435	0.213429
Glyma.11G235800	1.32795	0.569395	0.249672	1.37846	-1.22171	2.46495	-2.4111	1.27555
Glyma.11G241500	7.55879	25.6393	7.95398	61.9272	1.76213	2.96082	0.0735229	1.27222
Glyma.11G243900	2.89583	7.22807	1.60342	8.56668	1.31963	2.41758	-0.852823	0.245125
Glyma.12G011700	1.91847	6.56476	0.925157	7.0968	1.77478	2.9394	-1.05219	0.112426
Glyma.12G022700	17.7736	40.4501	11.2981	52.3491	1.18641	2.21208	-0.653653	0.372021
Glyma.12G022800	1.95643	5.38091	1.22118	12.9466	1.45963	3.40623	-0.679943	1.26665
Glyma.12G023300	0.006727	0.293472	0.00988567	0.325428	5.44712	5.04086	0.555375	0.149116
Glyma.12G028200	6.79846	23.1652	11.596	53.4568	1.76868	2.20475	0.770347	1.20641
Glyma.12G032900	3.65223	15.1809	2.41409	7.2617	2.0554	1.58883	-0.597298	-1.06388
Glyma.12G042400	11.6442	30.2261	45.9869	16.6998	1.37618	-1.46139	1.98161	-0.855965
Glyma.12G049300	5.75346	29.308	4.57438	16.6407	2.34879	1.86307	-0.330854	-0.816576
Glyma.12G053900	0.0184898	0.746979	0.0370203	0.405382	5.33627	3.45289	1.00159	-0.881788
Glyma.12G054100	0.427592	8.58002	0.0157167	2.53148	4.32668	7.33154	-4.76587	-1.761
Glyma.12G054200	1.13602	17.462	0.510479	2.76344	3.94216	2.43654	-1.15407	-2.65968
Glyma.12G062700	0.37862	1.43601	0.714751	1.8745	1.92324	1.391	0.916689	0.384445
Glyma.12G065900	0.633241	9.54326	1.44193	9.8539	3.91365	2.77269	1.18718	0.046213
Glyma.12G072000	9.61758	50.3953	9.14397	34.6263	2.38954	1.92098	-0.0728538	-0.541421
Glyma.12G073000	20.6464	52.481	7.37842	78.2301	1.3459	3.40634	-1.48451	0.575929
Glyma.12G076800	0.0937628	0.791016	0.335001	1.18447	3.07662	1.82201	1.83708	0.582466
Glyma.12G091200	5.93161	16.0289	3.21866	15.702	1.43418	2.28641	-0.881965	-0.0297358
Glyma.12G097200	0.786854	4.07572	1.73952	11.5746	2.37289	2.7342	1.14452	1.50584
Glyma.12G104500	0.0514043	0.852296	0.357444	2.52581	4.05139	2.82096	2.79776	1.56732
Glyma.12G105400	2.70926	11.7166	0.80944	20.1711	2.11259	4.63922	-1.7429	0.783728
Glyma.12G114300	0.695423	9.04637	0.208021	9.76525	3.70138	5.55286	-1.74116	0.110317
Glyma.12G116800	3.34929	23.5937	1.72448	20.8249	2.81648	3.59408	-0.957691	-0.18009
Glyma.12G130000	57.798	26.5472	56.694	10.3078	-1.12246	-2.45947	-0.0278247	-1.36483
Glyma.12G131800	1.63309	5.17302	16.9336	5.75234	1.6634	-1.55767	3.37421	0.15314
Glyma.12G131900	0.463583	1.55963	0.294464	2.10172	1.75031	2.8354	-0.654735	0.430361
Glyma.12G135600	2.16672	8.37079	3.72545	13.1227	1.94985	1.81658	0.781902	0.648629
Glyma.12G137700	0.217765	4.08109	0.203605	5.65727	4.22811	4.79626	-0.0969967	0.47115
Glyma.12G140300	0.586269	3.45299	0.469387	5.76117	2.55821	3.61751	-0.320785	0.738519
Glyma.12G149100	9.66784	32.0412	1.35154	36.4111	1.72866	4.75171	-2.83859	0.18445
Glyma.12G161500	190.338	91.587	237.556	112.01	-1.05535	-1.08464	0.319703	0.29041
Glyma.12G170500	13.4183	59.3739	23.0131	99.3169	2.14562	2.10958	0.778249	0.742209
Glyma.12G173500	20.841	53.2266	14.9785	58.2931	1.35273	1.96044	-0.476534	0.131177
Glyma.12G185400	2.81739	11.1083	1.36283	9.96867	1.97921	2.87079	-1.04775	-0.156171
Glyma.12G192600	0.595796	3.81776	0.475588	11.6125	2.67984	4.60982	-0.325105	1.60488
Glyma.12G197500	0	11.5609	0.033283	0.767668	13.497	4.52762	5.05671	-3.91263
Glyma.12G199200	0.403339	3.06777	0.0919437	4.83407	2.92713	5.71635	-2.13317	0.656048
Glyma.12G204300	2.13869	8.71808	3.26154	12.9509	2.02728	1.98943	0.608824	0.570973
Glyma.12G206800	1.82572	4.4102	2.39496	4.81832	1.27238	1.00853	0.391536	0.127687
Glyma.12G207400	2.19531	12.3622	1.02667	5.04025	2.49343	2.29552	-1.09645	-1.29437
Glyma.12G215100	4.45374	1.94364	0.598792	2.71847	-1.19626	2.18267	-2.89489	0.48404
Glyma.12G217500	44.2389	20.6913	7.50862	37.0946	-1.09629	2.30459	-2.5587	0.842186
Glyma.12G236500	2.12102	6.7881	1.91104	12.7691	1.67825	2.74022	-0.1504	0.911573
Glyma.13G004400	46.1149	11.5038	21.5974	7.21244	-2.00312	-1.5823	-1.09438	-0.673556
Glyma.13G005100	6.09972	18.7079	2.79254	17.1738	1.61684	2.62056	-1.12716	-0.123443
Glyma.13G005500	6.99852	16.9673	5.34214	12.3365	1.27763	1.20745	-0.389631	-0.459819
Glyma.13G006700	1.15136	6.42313	0.471288	7.69162	2.47994	4.02861	-1.28866	0.260012
Glyma.13G028100	2.03723	6.20403	1.55459	6.14893	1.6066	1.9838	-0.390072	-0.0128709
Glyma.13G030300	1.7851	9.70732	2.03033	11.699	2.44307	2.5266	0.185708	0.269238
Glyma.13G035800	10.1451	20.3259	2.74844	26.3079	1.00254	3.25881	-1.8841	0.372178
Glyma.13G043800	0.828198	3.19152	2.08849	7.64872	1.9462	1.87276	1.33441	1.26098
Glyma.13G067400	0.969177	0.164795	3.29833	0.360314	-2.55609	-3.19441	1.7669	1.12858
Glyma.13G076900	1.33172	15.27	0.870183	35.93	3.51933	5.36772	-0.613902	1.23449
Glyma.13G077000	0.106966	1.1648	0.0153353	1.90841	3.44486	6.95937	-2.80223	0.712282
Glyma.13G085800	3.67266	25.6502	2.81583	9.53186	2.80407	1.7592	-0.383264	-1.42814
Glyma.13G087500	0.990241	11.3713	0.498355	9.73987	3.52147	4.28866	-0.990606	-0.223419
Glyma.13G090300	0.404487	2.62512	0.0425893	2.0361	2.69822	5.57917	-3.24753	-0.366576
Glyma.13G095000	1.82651	6.56103	0.18102	12.3733	1.84483	6.09493	-3.33487	0.915235
Glyma.13G095200	0.827052	3.93911	0.315538	10.2097	2.25182	5.01598	-1.39016	1.374
Glyma.13G095300	0.0922063	1.16827	0.0723227	0.805975	3.66336	3.47821	-0.350418	-0.535563
Glyma.13G104700	0	0.400984	0	0.302122	8.6474	8.23899	0	-0.408416
Glyma.13G109800	0.0415013	4.99147	0.01289	6.80157	6.91016	9.04347	-1.68691	0.446404
Glyma.13G112000	12.8163	43.326	4.57937	95.6549	1.75725	4.38462	-1.48476	1.14261
Glyma.13G115900	29.0347	11.0983	28.8035	13.9371	-1.38744	-1.04731	-0.0115313	0.328602
Glyma.13G117600	3.66932	11.5816	3.21777	18.2613	1.65825	2.50465	-0.189452	0.656954
Glyma.13G118300	50.068	23.8887	43.3503	15.7741	-1.06756	-1.45848	-0.207845	-0.598766
Glyma.13G119500	6.53883	27.1651	8.81626	27.7869	2.05465	1.65617	0.431134	0.0326499
Glyma.13G132400	5.90602	18.3242	8.76233	19.2339	1.63349	1.13426	0.56913	0.0699003
Glyma.13G151200	4.82605	10.8962	8.67795	17.9922	1.1749	1.05195	0.846511	0.723553
Glyma.13G154000	1.52466	6.75167	1.74026	12.7212	2.14676	2.86986	0.190819	0.91392
Glyma.13G158200	13.2051	53.4511	23.2537	95.6797	2.01712	2.04075	0.81636	0.839992
Glyma.13G161500	1.97266	4.21131	7.36034	3.26604	1.09413	-1.17223	1.89963	-0.366727
Glyma.13G161900	111.653	241.275	29.6066	152.204	1.11166	2.36201	-1.91503	-0.664672
Glyma.13G167100	0.282623	4.46041	0.0723237	2.14371	3.98023	4.8895	-1.96634	-1.05707
Glyma.13G176600	1.33644	14.4501	0.520291	12.1328	3.43461	4.54345	-1.361	-0.252162
Glyma.13G186600	7.70414	21.9408	14.7351	4.50603	1.50991	-1.70933	0.935548	-2.28369
Glyma.13G190500	3.41205	1.47047	0.471778	1.85203	-1.21436	1.97293	-2.85446	0.332828
Glyma.13G207100	105.162	43.2688	72.5481	146.249	-1.28121	1.01142	-0.535597	1.75703
Glyma.13G213700	0.758768	3.18415	1.23571	5.23368	2.06918	2.08248	0.703615	0.716916
Glyma.13G219100	0.427134	16.9182	0.233748	15.9602	5.30775	6.09338	-0.869736	-0.0840992
Glyma.13G221700	10.6479	34.0132	11.9203	53.4943	1.67553	2.16596	0.16286	0.653291
Glyma.13G226600	4.59998	16.8348	2.81112	31.3268	1.87175	3.47818	-0.710484	0.895952
Glyma.13G234500	1.20437	11.2736	0.234331	11.4122	3.22659	5.60588	-2.36165	0.0176318
Glyma.13G239100	2.40867	5.00144	2.42224	5.37663	1.05411	1.15036	0.00810328	0.104358
Glyma.13G253300	2.24951	20.12	1.04699	22.7203	3.16095	4.43966	-1.10336	0.175354
Glyma.13G279200	41.0661	17.3588	7.4606	15.9341	-1.24228	1.09475	-2.46058	-0.123553
Glyma.13G283600	71.4149	33.5397	11.3573	62.6472	-1.09035	2.46363	-2.6526	0.90138
Glyma.13G285200	15.4998	64.433	0.287749	1.76493	2.05555	2.61673	-5.75129	-5.19012
Glyma.13G285500	1.60923	3.39606	3.03494	8.25187	1.07749	1.44305	0.915297	1.28086
Glyma.13G297200	4.6134	25.4017	8.10151	44.6854	2.46102	2.46354	0.812361	0.814877
Glyma.13G302500	0.865442	2.85819	0.739665	5.06155	1.72359	2.77464	-0.226565	0.824478
Glyma.13G315300	1.59485	5.31382	1.67256	6.49079	1.73632	1.95634	0.0686325	0.288647
Glyma.13G316200	7.81093	19.5175	8.13945	31.5856	1.3212	1.95626	0.0594363	0.6945
Glyma.13G329000	0.395267	1.50057	0.544492	3.95057	1.92462	2.85908	0.462084	1.39655
Glyma.13G329800	5.09344	13.8565	3.70771	9.59237	1.44385	1.37136	-0.458114	-0.530605
Glyma.13G330800	1.51895	11.8766	2.27033	8.1879	2.96698	1.85059	0.579828	-0.53656
Glyma.13G337900	1.42259	3.26989	2.45053	5.509	1.20072	1.1687	0.784577	0.752548
Glyma.13G338300	2.28115	0.257253	8.95714	1.6205	-3.1485	-2.4666	1.97328	2.65518
Glyma.13G347800	51.23	153.368	18.7552	218.785	1.58194	3.54415	-1.4497	0.51252
Glyma.13G357500	34.3709	5.60349	0.400405	4.00185	-2.61679	3.32114	-6.42358	-0.485656
Glyma.13G362500	0.063532	0.961618	0.122528	0.591577	3.91991	2.27146	0.947552	-0.700899
Glyma.14G002600	0.162677	2.46437	0.0270194	7.51448	3.92114	8.11953	-2.58994	1.60845
Glyma.14G003800	4.18931	10.7467	3.0685	11.2498	1.35911	1.8743	-0.449181	0.066007
Glyma.14G016000	0.81575	2.85255	1.75821	4.44131	1.80605	1.33688	1.10791	0.638734
Glyma.14G023000	0.910869	18.9695	0.461354	35.3566	4.3803	6.25996	-0.98137	0.898296
Glyma.14G024400	2.72663	7.16655	3.24926	9.73839	1.39416	1.58357	0.252992	0.442405
Glyma.14G024500	0.280043	4.64496	1.10459	5.43893	4.05194	2.29981	1.97979	0.227658
Glyma.14G029700	3.4419	12.6707	24.5701	6.67093	1.88022	-1.88094	2.83563	-0.925533
Glyma.14G040000	0.424676	2.13228	1.00786	2.48837	2.32796	1.30391	1.24686	0.222803
Glyma.14G048100	6.2423	18.0686	6.38456	25.4109	1.53334	1.99279	0.0325105	0.491963
Glyma.14G048900	2.10759	53.179	6.78989	47.1739	4.65719	2.79653	1.68779	-0.172869
Glyma.14G049000	2.2794	82.6448	1.38755	57.0305	5.18019	5.36113	-0.716122	-0.535189
Glyma.14G049100	0	0.693208	0.0725133	1.08519	9.43714	3.90356	6.18017	0.646586
Glyma.14G049200	7.84488	262.548	8.39481	133.372	5.06469	3.98982	0.0977471	-0.977124
Glyma.14G049700	1.9867	8.83636	15.6898	5.98776	2.15307	-1.38974	2.98138	-0.561435
Glyma.14G051700	6.33166	14.9637	1.83195	6.67826	1.24081	1.86609	-1.78921	-1.16393
Glyma.14G057600	1.07956	0.23989	1.10973	0.270774	-2.17	-2.03505	0.0397678	0.174714
Glyma.14G058700	0.059779	0.467246	0.00941333	0.280732	2.96647	4.89834	-2.66686	-0.734989
Glyma.14G061300	22.602	5.61613	0.915581	6.94367	-2.0088	2.92294	-4.62562	0.306122
Glyma.14G068000	5.74689	19.9694	2.9256	7.72702	1.79694	1.40118	-0.974048	-1.36981
Glyma.14G070200	1.69353	17.9998	1.10795	37.8953	3.40988	5.09605	-0.612139	1.07403
Glyma.14G073300	0.140406	13.1761	0.224324	1.46385	6.55217	2.70611	0.675983	-3.17008
Glyma.14G082200	3.65907	10.8765	3.04263	11.846	1.57167	1.96101	-0.266157	0.123183
Glyma.14G090000	1.06463	4.85927	1.06095	7.10147	2.19039	2.74277	-0.00499457	0.54738
Glyma.14G092800	1427.32	399.728	1052.03	497.212	-1.83622	-1.08125	-0.440132	0.314844
[truncated: 282 more rows]
