# Supplementary material for: Identifying Soybean Pod Borer (Leguminivora glycinivorella) Resistance QTLs and the Mechanism of Induced Defense Using Linkage Mapping and RNA-Seq Analysis
Source: Int J Mol Sci. 2022 Sep 18;23(18):10910. doi: 10.3390/ijms231810910 (PMC9504297; doi:10.3390/ijms231810910)
Supplement: Supplementary file 1 [file ijms-23-10910-s001.zip › Table S5.xlsx]

## Sheet: Annotation
The annotation of differential response differently expressed genes [DEGs,(|log2 fold change|≥1 and p adjust <0.05)] to SPB eating (DRGs)
'up' indicates up-regulation of the gene after insect feeding, 'donw' indicates down-regulation of the gene
Gene Locus	Type	Regulation	Ortholog gene of Arabidopsis(TAIR10)	Function	TFs classification	Gene Ontology Biological Process IDs	Gene Ontology Biological Process Descriptions	Gene Ontology Molecular Function IDs	Gene Ontology Molecular Function Descriptions	Gene Ontology Cellular Component IDs	Gene Ontology Cellular Component Descriptions
Glyma.01G002400	Only K6	down	AT2G06925	Phospholipase A2 family protein		NA	NA	GO:0004623	phospholipase A2 activity	GO:0005576 GO:0005773 GO:0005794	Golgi apparatus; extracellular region; vacuole
Glyma.01G003000	Only K6	up	AT5G56840	myb-like transcription factor family protein	MYB_related	GO:0006355	regulation of transcription, DNA-dependent	GO:0003676 GO:0003677 GO:0003700 GO:0008270	DNA binding; nucleic acid binding; sequence-specific DNA binding transcription factor activity; zinc ion binding	GO:0005634	nucleus
Glyma.01G003400	Only JY93	down	AT2G15690	Tetratricopeptide repeat (TPR)-like superfamily protein		GO:0008150	biological process	GO:0003674	molecular function	GO:0005739	mitochondrion
Glyma.01G003800	Only JY93	down	AT4G29510	arginine methyltransferase 11		GO:0006479 GO:0009909 GO:0034968	histone lysine methylation; protein methylation; regulation of flower development	GO:0005515 GO:0008276 GO:0016274	protein-arginine N-methyltransferase activity; protein binding; protein methyltransferase activity	GO:0005634 GO:0005737 GO:0005829	cytoplasm; cytosol; nucleus
Glyma.01G004100	Only K6	up	AT2G19710	Regulator of Vps4 activity in the MVB pathway protein		GO:0008150	biological process	NA	NA	NA	NA
Glyma.01G006500	Only K6	up	AT5G45140	nuclear RNA polymerase C2		GO:0006351 GO:0009560	embryo sac egg cell differentiation; transcription, DNA-dependent	GO:0003677 GO:0003899 GO:0032549	DNA-directed RNA polymerase activity; DNA binding; ribonucleoside binding	GO:0009507	chloroplast
Glyma.01G007400	Only K6	up	AT5G25930	Protein kinase family protein with leucine-rich repeat domain		GO:0002679 GO:0006468 GO:0006612 GO:0006944 GO:0009723 GO:0009738 GO:0010200 GO:0010363 GO:0035556 GO:0043069 GO:0052542	abscisic acid mediated signaling pathway; cellular membrane fusion; defense response by callose deposition; intracellular signal transduction; negative regulation of programmed cell death; protein phosphorylation; protein targeting to membrane; regulation of plant-type hypersensitive response; respiratory burst involved in defense response; response to chitin; response to ethylene stimulus	GO:0004672 GO:0004674 GO:0005524 GO:0016301 GO:0016772	ATP binding; kinase activity; protein kinase activity; protein serine/threonine kinase activity; transferase activity, transferring phosphorus-containing groups	GO:0005886 GO:0016020	membrane; plasma membrane
Glyma.01G009800	Only JY93	up	AT5G45590	Ribosomal protein L35		GO:0006412	translation	GO:0003735	structural constituent of ribosome	GO:0005622 GO:0005739 GO:0005840	intracellular; mitochondrion; ribosome
Glyma.01G010500	Only K6	up	AT3G07040	NB-ARC domain-containing disease resistance protein		GO:0006952 GO:0009626	defense response; plant-type hypersensitive response	GO:0000166 GO:0005515 GO:0043531	ADP binding; nucleotide binding; protein binding	GO:0005886	plasma membrane
Glyma.01G011300	Only JY93	up	AT1G31920	Tetratricopeptide repeat (TPR)-like superfamily protein		GO:0008150 GO:0010075 GO:0016556	biological process; mRNA modification; regulation of meristem growth	NA	NA	GO:0005739	mitochondrion
Glyma.01G014600	Only K6	up	AT5G46880	homeobox-7	HD-ZIP	GO:0006355 GO:0006944 GO:0048497	cellular membrane fusion; maintenance of floral organ identity; regulation of transcription, DNA-dependent	GO:0003677 GO:0003700 GO:0043565	DNA binding; sequence-specific DNA binding; sequence-specific DNA binding transcription factor activity	GO:0005634	nucleus
Glyma.01G016600	Only K6	up	AT5G16770	myb domain protein 9	MYB	GO:0006355 GO:0009737	regulation of transcription, DNA-dependent; response to abscisic acid stimulus	GO:0003677 GO:0003700	DNA binding; sequence-specific DNA binding transcription factor activity	GO:0005634	nucleus
Glyma.01G017400	Only K6	up	AT2G35410	RNA-binding (RRM/RBD/RNP motifs) family protein		GO:0006364 GO:0009902 GO:0010027 GO:0015979 GO:0015995 GO:0019288 GO:0034660 GO:0042793	chlorophyll biosynthetic process; chloroplast relocation; isopentenyl diphosphate biosynthetic process, mevalonate-independent pathway; ncRNA metabolic process; photosynthesis; rRNA processing; thylakoid membrane organization; transcription from plastid promoter	GO:0000166 GO:0003676 GO:0003723	RNA binding; nucleic acid binding; nucleotide binding	GO:0009507 GO:0009570 GO:0009579	chloroplast; chloroplast stroma; thylakoid
Glyma.01G018000	Only JY93	down	NA	NA		NA	NA	NA	NA	NA	NA
Glyma.01G019700	Only K6	down	AT5G65640	beta HLH protein 93	bHLH	NA	NA	GO:0003677 GO:0003700	DNA binding; sequence-specific DNA binding transcription factor activity	GO:0005634	nucleus
Glyma.01G019800	Only JY93	down	AT2G22660	Protein of unknown function (duplicated DUF1399)		GO:0008150	biological process	GO:0003674	molecular function	GO:0005634 GO:0005737 GO:0005886	cytoplasm; nucleus; plasma membrane
Glyma.01G021100	Only K6	down	AT5G65590	Dof-type zinc finger DNA-binding family protein	Dof	GO:0006355 GO:0010052 GO:0010118 GO:0045893 GO:1902066	guard cell differentiation; positive regulation of transcription, DNA-dependent; regulation of cell wall pectin metabolic process; regulation of transcription, DNA-dependent; stomatal movement	GO:0003677 GO:0003700 GO:0043565	DNA binding; sequence-specific DNA binding; sequence-specific DNA binding transcription factor activity	GO:0005634	nucleus
Glyma.01G024000	Only K6	up	AT2G22500	uncoupling protein 5		GO:0006810 GO:0006839 GO:0010200 GO:0015992	mitochondrial transport; proton transport; response to chitin; transport	GO:0005310 GO:0017077	dicarboxylic acid transmembrane transporter activity; oxidative phosphorylation uncoupler activity	GO:0005739 GO:0005743 GO:0031966	mitochondrial inner membrane; mitochondrial membrane; mitochondrion
Glyma.01G024300	Only K6	up	NA	NA		NA	NA	NA	NA	NA	NA
Glyma.01G024500	Only K6	up	NA	NA		NA	NA	NA	NA	NA	NA
Glyma.01G025200	Only JY93	up	AT5G65380	MATE efflux family protein		GO:0006855 GO:0009835 GO:0055085	drug transmembrane transport; fruit ripening; transmembrane transport	GO:0005215 GO:0015238 GO:0015297	antiporter activity; drug transmembrane transporter activity; transporter activity	GO:0005886 GO:0016020	membrane; plasma membrane
Glyma.01G025800	Only K6	up	AT3G26510	Octicosapeptide/Phox/Bem1p family protein		GO:0008150	biological process	GO:0005515	protein binding	GO:0005634	nucleus
Glyma.01G026000	Only K6	down	AT1G70610	transporter associated with antigen processing protein 1		GO:0000302 GO:0006810 GO:0010039 GO:0015996 GO:0055072 GO:0055085	chlorophyll catabolic process; iron ion homeostasis; response to iron ion; response to reactive oxygen species; transmembrane transport; transport	GO:0000166 GO:0005215 GO:0005524 GO:0016887 GO:0017111 GO:0042626	ATP binding; ATPase activity; ATPase activity, coupled to transmembrane movement of substances; nucleoside-triphosphatase activity; nucleotide binding; transporter activity	GO:0009507 GO:0009941 GO:0016021	chloroplast; chloroplast envelope; integral to membrane
Glyma.01G028100	Only JY93	up	AT1G70520	cysteine-rich RLK (RECEPTOR-like protein kinase) 2		GO:0006457 GO:0006468 GO:0006857 GO:0009408 GO:0009644 GO:0010193 GO:0034976 GO:0042542 GO:0046777	oligopeptide transport; protein autophosphorylation; protein folding; protein phosphorylation; response to endoplasmic reticulum stress; response to heat; response to high light intensity; response to hydrogen peroxide; response to ozone	GO:0004672 GO:0004674 GO:0005524 GO:0016301 GO:0016772	ATP binding; kinase activity; protein kinase activity; protein serine/threonine kinase activity; transferase activity, transferring phosphorus-containing groups	GO:0005576 GO:0005886 GO:0009506	extracellular region; plasma membrane; plasmodesma
Glyma.01G030300	Only K6	up	AT1G70420	Protein of unknown function (DUF1645)		GO:0080167	response to karrikin	GO:0003674	molecular function	GO:0005634	nucleus
Glyma.01G030900	Only JY93	up	AT1G70370	polygalacturonase 2		GO:0000271 GO:0000272 GO:0005982 GO:0007389 GO:0008150 GO:0008361 GO:0009664 GO:0009825 GO:0009832 GO:0009926 GO:0009932 GO:0010015 GO:0010075 GO:0010817 GO:0040007 GO:0043481 GO:0048653 GO:0048767 GO:0071555	anther development; anthocyanin accumulation in tissues in response to UV light; auxin polar transport; biological process; cell tip growth; cell wall organization; growth; multidimensional cell growth; pattern specification process; plant-type cell wall biogenesis; plant-type cell wall organization; polysaccharide biosynthetic process; polysaccharide catabolic process; regulation of cell size; r…	GO:0004650	polygalacturonase activity	GO:0005576	extracellular region
Glyma.01G031800	Only K6	down	AT1G70300	K+ uptake permease 6		GO:0006813 GO:0071805	potassium ion transmembrane transport; potassium ion transport	GO:0015079	potassium ion transmembrane transporter activity	GO:0005886 GO:0016020	membrane; plasma membrane
Glyma.01G032300	Only K6	up	NA	NA		NA	NA	NA	NA	NA	NA
Glyma.01G033200	Only JY93	up	AT1G69550	disease resistance protein (TIR-NBS-LRR class)		GO:0006952 GO:0007165	defense response; signal transduction	GO:0000166 GO:0017111 GO:0043531	ADP binding; nucleoside-triphosphatase activity; nucleotide binding	GO:0005622	intracellular
Glyma.01G033500	Only K6	down	AT5G40240	nodulin MtN21 /EamA-like transporter family protein		NA	NA	GO:0003674	molecular function	GO:0016020	membrane
Glyma.01G034300	Only JY93	up	AT1G70230	TRICHOME BIREFRINGENCE-LIKE 27		GO:0010167 GO:0010411 GO:0015706	nitrate transport; response to nitrate; xyloglucan metabolic process	NA	NA	GO:0005634 GO:0005794	Golgi apparatus; nucleus
Glyma.01G034900	Only JY93	up	AT1G70230	TRICHOME BIREFRINGENCE-LIKE 27		GO:0010167 GO:0010411 GO:0015706	nitrate transport; response to nitrate; xyloglucan metabolic process	NA	NA	GO:0005634 GO:0005794	Golgi apparatus; nucleus
Glyma.01G035300	Only K6	down	AT1G60010	NA		GO:0006499 GO:0006833 GO:0009651 GO:0009750	N-terminal protein myristoylation; response to fructose stimulus; response to salt stress; water transport	GO:0003674	molecular function	GO:0005634	nucleus
Glyma.01G035700	Only JY93	down	AT1G70200	RNA-binding (RRM/RBD/RNP motifs) family protein		GO:0006364 GO:0006399 GO:0009658 GO:0010027 GO:0045036	chloroplast organization; protein targeting to chloroplast; rRNA processing; tRNA metabolic process; thylakoid membrane organization	GO:0003676	nucleic acid binding	GO:0009507	chloroplast
Glyma.01G037200	Only K6	up	AT1G24140	Matrixin family protein		GO:0006508 GO:0008152 GO:0009693 GO:0010200 GO:0030968	endoplasmic reticulum unfolded protein response; ethylene biosynthetic process; metabolic process; proteolysis; response to chitin	GO:0004222 GO:0008237 GO:0008270	metalloendopeptidase activity; metallopeptidase activity; zinc ion binding	GO:0005576 GO:0031012 GO:0031225	anchored to membrane; extracellular matrix; extracellular region
Glyma.01G038200	Only JY93	up	NA	NA		NA	NA	NA	NA	NA	NA
Glyma.01G038500	Only K6	up	AT1G27200	Domain of unknown function (DUF23)		GO:0008150	biological process	NA	NA	GO:0005634 GO:0005794	Golgi apparatus; nucleus
Glyma.01G038600	Only K6	down	AT1G70000	myb-like transcription factor family protein	MYB_related	GO:0006355 GO:0009651 GO:0009723 GO:0009733 GO:0009737 GO:0009739 GO:0009751 GO:0009753 GO:0046686 GO:0080167	regulation of transcription, DNA-dependent; response to abscisic acid stimulus; response to auxin stimulus; response to cadmium ion; response to ethylene stimulus; response to gibberellin stimulus; response to jasmonic acid stimulus; response to karrikin; response to salicylic acid stimulus; response to salt stress	GO:0003676 GO:0003677 GO:0003700 GO:0008270	DNA binding; nucleic acid binding; sequence-specific DNA binding transcription factor activity; zinc ion binding	GO:0005634	nucleus
Glyma.01G040600	Only K6	up	AT1G59725	DNAJ heat shock family protein		GO:0006457	protein folding	GO:0031072 GO:0051082	heat shock protein binding; unfolded protein binding	GO:0005737	cytoplasm
Glyma.01G040900	Only JY93	up	AT1G32490	RNA helicase family protein		GO:0006306 GO:0006342 GO:0007267 GO:0008380 GO:0009616 GO:0009793 GO:0010267 GO:0035194 GO:0035196	DNA methylation; RNA splicing; cell-cell signaling; chromatin silencing; embryo development ending in seed dormancy; posttranscriptional gene silencing by RNA; production of miRNAs involved in gene silencing by miRNA; production of ta-siRNAs involved in RNA interference; virus induced gene silencing	GO:0003676 GO:0004004 GO:0004386 GO:0005524 GO:0008026	ATP-dependent RNA helicase activity; ATP-dependent helicase activity; ATP binding; helicase activity; nucleic acid binding	GO:0005634 GO:0016020	membrane; nucleus
Glyma.01G044100	Only K6	up	AT2G02800	protein kinase 2B		GO:0006468	protein phosphorylation	GO:0004672 GO:0004674 GO:0005524 GO:0016301 GO:0016772	ATP binding; kinase activity; protein kinase activity; protein serine/threonine kinase activity; transferase activity, transferring phosphorus-containing groups	GO:0005634 GO:0005737 GO:0005886 GO:0009507	chloroplast; cytoplasm; nucleus; plasma membrane
Glyma.01G044800	Only JY93	up	AT1G26945	basic helix-loop-helix (bHLH) DNA-binding superfamily protein	bHLH	GO:0009416	response to light stimulus	NA	NA	GO:0005634	nucleus
Glyma.01G046700	Only JY93	up	AT1G26850	S-adenosyl-L-methionine-dependent methyltransferases superfamily protein		NA	NA	GO:0008168	methyltransferase activity	GO:0005768 GO:0005794 GO:0005802 GO:0016020	Golgi apparatus; endosome; membrane; trans-Golgi network
Glyma.01G047900	Only JY93	up	AT5G15210	homeobox protein 30	ZF-HD	NA	NA	GO:0003677 GO:0003700 GO:0005515	DNA binding; protein binding; sequence-specific DNA binding transcription factor activity	GO:0005634	nucleus
Glyma.01G048000	Only JY93	up	AT5G39785	Protein of unknown function (DUF1666)		GO:0006412	translation	GO:0003735	structural constituent of ribosome	GO:0005622 GO:0005634 GO:0005840	intracellular; nucleus; ribosome
Glyma.01G048500	Only K6	up	AT1G26810	galactosyltransferase1		GO:0006486 GO:0010493	Lewis a epitope biosynthetic process; protein glycosylation	GO:0008378 GO:0010488 GO:0016757 GO:0016758 GO:0030246	UDP-galactose:N-glycan beta-1,3-galactosyltransferase activity; carbohydrate binding; galactosyltransferase activity; transferase activity, transferring glycosyl groups; transferase activity, transferring hexosyl groups	GO:0005794 GO:0016020	Golgi apparatus; membrane
Glyma.01G055700	Only JY93	down	AT1G15460	HCO3- transporter family		GO:0006820 GO:0046713 GO:0080029	anion transport; borate transport; cellular response to boron-containing substance levels	GO:0005452 GO:0015301 GO:0080139	anion:anion antiporter activity; borate efflux transmembrane transporter activity; inorganic anion exchanger activity	GO:0005886 GO:0016020 GO:0016021	integral to membrane; membrane; plasma membrane
Glyma.01G056000	Only JY93	up	AT1G13920	Remorin family protein		GO:0008150	biological process	GO:0003677	DNA binding	GO:0005737	cytoplasm
Glyma.01G056100	Only JY93	up	AT1G17020	senescence-related gene 1		GO:0009737 GO:0009793 GO:0009813 GO:0009830 GO:0009845 GO:0010162 GO:0010260 GO:0055114	cell wall modification involved in abscission; embryo development ending in seed dormancy; flavonoid biosynthetic process; organ senescence; oxidation-reduction process; response to abscisic acid stimulus; seed dormancy process; seed germination	GO:0016491 GO:0016682 GO:0016706	oxidoreductase activity; oxidoreductase activity, acting on diphenols and related substances as donors, oxygen as acceptor; oxidoreductase activity, acting on paired donors, with incorporation or reduction of molecular oxygen, 2-oxoglutarate as one donor, and incorporation of one atom each of oxygen into both donors	GO:0005737	cytoplasm
Glyma.01G060300	Only JY93	up	AT1G13740	ABI five binding protein 2		GO:0009414 GO:0009737 GO:0009738 GO:0045893	abscisic acid mediated signaling pathway; positive regulation of transcription, DNA-dependent; response to abscisic acid stimulus; response to water deprivation	GO:0005515	protein binding	GO:0005634	nucleus
Glyma.01G061000	Only K6	up	NA	NA		NA	NA	NA	NA	NA	NA
Glyma.01G062400	Only K6	up	AT1G31710	Copper amine oxidase family protein		GO:0006569 GO:0009308 GO:0009611 GO:0009684 GO:0009805 GO:0055114	amine metabolic process; coumarin biosynthetic process; indoleacetic acid biosynthetic process; oxidation-reduction process; response to wounding; tryptophan catabolic process	GO:0005507 GO:0008131 GO:0048038	copper ion binding; primary amine oxidase activity; quinone binding	GO:0005576	extracellular region
Glyma.01G063800	Only JY93	up	AT1G13670	NA		GO:0008150	biological process	GO:0003674	molecular function	GO:0005634	nucleus
Glyma.01G064600	Only K6	up	AT1G69040	ACT domain repeat 4		GO:0006521 GO:0008152 GO:0009735	metabolic process; regulation of cellular amino acid metabolic process; response to cytokinin stimulus	GO:0016597	amino acid binding	GO:0005829 GO:0009507	chloroplast; cytosol
Glyma.01G069000	Only K6	up	NA	NA		NA	NA	NA	NA	NA	NA
Glyma.01G072800	Only JY93	up	AT1G16080	NA		GO:0006098 GO:0009965 GO:0010027 GO:0016117 GO:0030154	carotenoid biosynthetic process; cell differentiation; leaf morphogenesis; pentose-phosphate shunt; thylakoid membrane organization	NA	NA	GO:0009507 GO:0009570 GO:0009941 GO:0048046	apoplast; chloroplast; chloroplast envelope; chloroplast stroma
Glyma.01G073200	Only K6	down	AT2G44990	carotenoid cleavage dioxygenase 7		GO:0009926 GO:0010223 GO:0016121 GO:0016124	auxin polar transport; carotene catabolic process; secondary shoot formation; xanthophyll catabolic process	GO:0045549	9-cis-epoxycarotenoid dioxygenase activity	GO:0009507 GO:0009536 GO:0009570	chloroplast; chloroplast stroma; plastid
Glyma.01G074200	Only JY93	up	AT2G44940	Integrase-type DNA-binding superfamily protein	ERF	GO:0006355	regulation of transcription, DNA-dependent	GO:0003677 GO:0003700	DNA binding; sequence-specific DNA binding transcription factor activity	GO:0005634	nucleus
Glyma.01G074600	Only JY93	up	AT4G01070	UDP-Glycosyltransferase superfamily protein		GO:0006612 GO:0006805 GO:0008152 GO:0009611 GO:0009636 GO:0009651 GO:0009805 GO:0009963 GO:0010363 GO:0042178	coumarin biosynthetic process; metabolic process; positive regulation of flavonoid biosynthetic process; protein targeting to membrane; regulation of plant-type hypersensitive response; response to salt stress; response to toxic substance; response to wounding; xenobiotic catabolic process; xenobiotic metabolic process	GO:0008194 GO:0016757 GO:0016758 GO:0035251	UDP-glucosyltransferase activity; UDP-glycosyltransferase activity; transferase activity, transferring glycosyl groups; transferase activity, transferring hexosyl groups	GO:0005634	nucleus
Glyma.01G075100	Only JY93	down	AT2G45030	Translation elongation factor EFG/EF2 protein		GO:0006414 GO:0046686	response to cadmium ion; translational elongation	GO:0003746 GO:0003924 GO:0005525 GO:0008135	GTP binding; GTPase activity; translation elongation factor activity; translation factor activity, nucleic acid binding	GO:0005622 GO:0005739	intracellular; mitochondrion
Glyma.01G075300	Only JY93	down	AT1G45332	Translation elongation factor EFG/EF2 protein		GO:0006414	translational elongation	GO:0003746 GO:0003924 GO:0005524 GO:0005525 GO:0008135	ATP binding; GTP binding; GTPase activity; translation elongation factor activity; translation factor activity, nucleic acid binding	GO:0005622 GO:0005739	intracellular; mitochondrion
Glyma.01G081700	Only JY93	down	AT1G68570	Major facilitator superfamily protein		GO:0006857	oligopeptide transport	GO:0005215	transporter activity	GO:0005886 GO:0016020	membrane; plasma membrane
Glyma.01G083000	Only K6	up	AT1G13340	Regulator of Vps4 activity in the MVB pathway protein		GO:0006979 GO:0009697 GO:0009863 GO:0031348 GO:0045087	innate immune response; negative regulation of defense response; response to oxidative stress; salicylic acid biosynthetic process; salicylic acid mediated signaling pathway	NA	NA	GO:0005737	cytoplasm
Glyma.01G085800	Only K6	down	AT3G02100	UDP-Glycosyltransferase superfamily protein		GO:0008152	metabolic process	GO:0008194 GO:0016757 GO:0016758	UDP-glycosyltransferase activity; transferase activity, transferring glycosyl groups; transferase activity, transferring hexosyl groups	GO:0005634	nucleus
Glyma.01G086700	Only K6	up	AT1G25550	myb-like transcription factor family protein	G2-like	GO:0006355 GO:0010167 GO:0015706	nitrate transport; regulation of transcription, DNA-dependent; response to nitrate	GO:0003677 GO:0003700	DNA binding; sequence-specific DNA binding transcription factor activity	GO:0005634	nucleus
Glyma.01G086900	Only K6	up	AT1G13280	allene oxide cyclase 4		GO:0009695	jasmonic acid biosynthetic process	GO:0016853 GO:0046423	allene-oxide cyclase activity; isomerase activity	GO:0005886 GO:0009507	chloroplast; plasma membrane
Glyma.01G087100	Only JY93	down	AT1G13270	methionine aminopeptidase 1B		GO:0006508 GO:0009987 GO:0019243 GO:0031365	N-terminal protein amino acid modification; cellular process; methylglyoxal catabolic process to D-lactate; proteolysis	GO:0004177 GO:0008235	aminopeptidase activity; metalloexopeptidase activity	GO:0005739 GO:0009507	chloroplast; mitochondrion
Glyma.01G087500	Only K6	up	AT1G25560	AP2/B3 transcription factor family protein	RAV	GO:0006355 GO:0009873 GO:0030003 GO:0048573 GO:0070838	cellular cation homeostasis; divalent metal ion transport; ethylene mediated signaling pathway; photoperiodism, flowering; regulation of transcription, DNA-dependent	GO:0003677 GO:0003700	DNA binding; sequence-specific DNA binding transcription factor activity	GO:0005634	nucleus
Glyma.01G087900	Only JY93	up	AT1G68830	STT7 homolog STN7		GO:0006468 GO:0007623 GO:0015996 GO:0042548	chlorophyll catabolic process; circadian rhythm; protein phosphorylation; regulation of photosynthesis, light reaction	GO:0004672 GO:0004674 GO:0005524 GO:0016301 GO:0016772	ATP binding; kinase activity; protein kinase activity; protein serine/threonine kinase activity; transferase activity, transferring phosphorus-containing groups	GO:0009507	chloroplast
Glyma.01G091100	Only K6	down	AT3G25620	ABC-2 type transporter family protein		NA	NA	GO:0000166 GO:0005524 GO:0016887 GO:0017111 GO:0042626	ATP binding; ATPase activity; ATPase activity, coupled to transmembrane movement of substances; nucleoside-triphosphatase activity; nucleotide binding	GO:0005634 GO:0009507 GO:0016020	chloroplast; membrane; nucleus
Glyma.01G091400	Only JY93	up	AT5G13930	Chalcone and stilbene synthase family protein		GO:0006979 GO:0008152 GO:0009058 GO:0009411 GO:0009611 GO:0009629 GO:0009715 GO:0009718 GO:0009733 GO:0009744 GO:0009753 GO:0009813 GO:0009926 GO:0010224 GO:0031540	anthocyanin-containing compound biosynthetic process; auxin polar transport; biosynthetic process; chalcone biosynthetic process; flavonoid biosynthetic process; metabolic process; regulation of anthocyanin biosynthetic process; response to UV; response to UV-B; response to auxin stimulus; response to gravity; response to jasmonic acid stimulus; response to oxidative stress; response to sucrose s…	GO:0003824 GO:0005515 GO:0016210 GO:0016746 GO:0016747	catalytic activity; naringenin-chalcone synthase activity; protein binding; transferase activity, transferring acyl groups; transferase activity, transferring acyl groups other than amino-acyl groups	GO:0005634 GO:0005737 GO:0005783 GO:0009705	cytoplasm; endoplasmic reticulum; nucleus; plant-type vacuole membrane
Glyma.01G092900	Only K6	up	AT1G68710	ATPase E1-E2 type family protein / haloacid dehalogenase-like hydrolase family protein		GO:0006812 GO:0008152 GO:0015914	cation transport; metabolic process; phospholipid transport	GO:0000166 GO:0000287 GO:0003824 GO:0004012 GO:0005524 GO:0015662 GO:0016820 GO:0046872	ATP binding; ATPase activity, coupled to transmembrane movement of ions, phosphorylative mechanism; catalytic activity; hydrolase activity, acting on acid anhydrides, catalyzing transmembrane movement of substances; magnesium ion binding; metal ion binding; nucleotide binding; phospholipid-translocating ATPase activity	GO:0016020 GO:0016021	integral to membrane; membrane
Glyma.01G093100	Only K6	up	AT1G26150	proline-rich extensin-like receptor kinase 10		GO:0006468	protein phosphorylation	GO:0004672 GO:0004674 GO:0004713 GO:0005524 GO:0016772	ATP binding; protein kinase activity; protein serine/threonine kinase activity; protein tyrosine kinase activity; transferase activity, transferring phosphorus-containing groups	GO:0005886	plasma membrane
Glyma.01G093800	Only K6	up	AT1G63840	RING/U-box superfamily protein		GO:0007165 GO:0009414 GO:0009611 GO:0009723 GO:0009733 GO:0009737 GO:0009738 GO:0009753 GO:0042538	abscisic acid mediated signaling pathway; hyperosmotic salinity response; response to abscisic acid stimulus; response to auxin stimulus; response to ethylene stimulus; response to jasmonic acid stimulus; response to water deprivation; response to wounding; signal transduction	GO:0008270	zinc ion binding	NA	NA
Glyma.01G094900	Only K6	up	AT1G02170	metacaspase 1		GO:0006508 GO:0006612 GO:0006944 GO:0009697 GO:0009863 GO:0010363 GO:0030968 GO:0031348 GO:0043068 GO:0043069 GO:0045087	cellular membrane fusion; endoplasmic reticulum unfolded protein response; innate immune response; negative regulation of defense response; negative regulation of programmed cell death; positive regulation of programmed cell death; protein targeting to membrane; proteolysis; regulation of plant-type hypersensitive response; salicylic acid biosynthetic process; salicylic acid mediated signaling pa…	GO:0004197 GO:0005515	cysteine-type endopeptidase activity; protein binding	NA	NA
Glyma.01G096600	Only K6	up	AT1G32640	Basic helix-loop-helix (bHLH) DNA-binding family protein	bHLH	GO:0006568 GO:0006612 GO:0009269 GO:0009611 GO:0009620 GO:0009694 GO:0009695 GO:0009737 GO:0009738 GO:0009753 GO:0009759 GO:0009863 GO:0009867 GO:0009963 GO:0010200 GO:0010363 GO:0043069 GO:0043619 GO:0045893 GO:0048364 GO:0051090 GO:2000068	abscisic acid mediated signaling pathway; indole glucosinolate biosynthetic process; jasmonic acid biosynthetic process; jasmonic acid mediated signaling pathway; jasmonic acid metabolic process; negative regulation of programmed cell death; positive regulation of flavonoid biosynthetic process; positive regulation of transcription, DNA-dependent; protein targeting to membrane; regulation of defe…	GO:0003677 GO:0003700 GO:0005515	DNA binding; protein binding; sequence-specific DNA binding transcription factor activity	GO:0005634	nucleus
Glyma.01G097900	Only K6	down	AT2G22680	Zinc finger (C3HC4-type RING finger) family protein		GO:0009062 GO:0009690 GO:0016132	brassinosteroid biosynthetic process; cytokinin metabolic process; fatty acid catabolic process	GO:0004842 GO:0008270	ubiquitin-protein ligase activity; zinc ion binding	GO:0005576	extracellular region
Glyma.01G101100	Only K6	up	AT5G51670	Protein of unknown function (DUF668)		GO:0008150	biological process	NA	NA	GO:0005739	mitochondrion
Glyma.01G101200	Only JY93	up	NA	NA		NA	NA	NA	NA	NA	NA
Glyma.01G102800	Only JY93	up	NA	NA		NA	NA	NA	NA	NA	NA
Glyma.01G102900	Only JY93	up	AT2G37770	NAD(P)-linked oxidoreductase superfamily protein		GO:0009409 GO:0009414 GO:0009651 GO:0055114	oxidation-reduction process; response to cold; response to salt stress; response to water deprivation	GO:0004033 GO:0008106 GO:0016229 GO:0016491 GO:0070401	NADP+ binding; alcohol dehydrogenase (NADP+) activity; aldo-keto reductase (NADP) activity; oxidoreductase activity; steroid dehydrogenase activity	GO:0005737 GO:0009507	chloroplast; cytoplasm
Glyma.01G106700	Only JY93	down	AT2G26975	Ctr copper transporter family		GO:0006825 GO:0035434	copper ion transmembrane transport; copper ion transport	GO:0005375	copper ion transmembrane transporter activity	GO:0005773 GO:0016021	integral to membrane; vacuole
Glyma.01G106800	Only JY93	up	AT1G53540	HSP20-like chaperones superfamily protein		GO:0006457 GO:0009408 GO:0009644 GO:0034976 GO:0042542	protein folding; response to endoplasmic reticulum stress; response to heat; response to high light intensity; response to hydrogen peroxide	NA	NA	GO:0005737	cytoplasm
Glyma.01G109500	Only JY93	up	AT2G37970	SOUL heme-binding family protein		GO:0006499 GO:0009744 GO:0009813 GO:0010017 GO:0010224	N-terminal protein myristoylation; flavonoid biosynthetic process; red or far-red light signaling pathway; response to UV-B; response to sucrose stimulus	NA	NA	GO:0005737 GO:0005773 GO:0005794 GO:0005886	Golgi apparatus; cytoplasm; plasma membrane; vacuole
Glyma.01G112600	Only K6	up	AT2G38080	Laccase/Diphenol oxidase family protein		GO:0009809 GO:0009834 GO:0010413 GO:0045492 GO:0046274 GO:0055114	glucuronoxylan metabolic process; lignin biosynthetic process; lignin catabolic process; oxidation-reduction process; secondary cell wall biogenesis; xylan biosynthetic process	GO:0005507 GO:0016491 GO:0052716	copper ion binding; hydroquinone:oxygen oxidoreductase activity; oxidoreductase activity	GO:0005576 GO:0048046	apoplast; extracellular region
Glyma.01G114400	Only K6	up	AT4G31980	NA		GO:0006865 GO:0008150	amino acid transport; biological process	GO:0003674	molecular function	GO:0005886	plasma membrane
Glyma.01G118000	Only JY93	up	AT5G01320	Thiamine pyrophosphate dependent pyruvate decarboxylase family protein		NA	NA	GO:0000287 GO:0003824 GO:0004737 GO:0016740 GO:0016831 GO:0030976	carboxy-lyase activity; catalytic activity; magnesium ion binding; pyruvate decarboxylase activity; thiamine pyrophosphate binding; transferase activity	GO:0005575	cellular component
Glyma.01G120400	Only K6	up	AT5G05580	fatty acid desaturase 8		GO:0006629 GO:0006633 GO:0009266 GO:0055114	fatty acid biosynthetic process; lipid metabolic process; oxidation-reduction process; response to temperature stimulus	GO:0016717 GO:0042389	omega-3 fatty acid desaturase activity; oxidoreductase activity, acting on paired donors, with oxidation of a pair of donors resulting in the reduction of molecular oxygen to two molecules of water	GO:0009507 GO:0009941	chloroplast; chloroplast envelope
Glyma.01G120800	Only K6	up	AT5G01370	ALC-interacting protein 1		GO:0010047	fruit dehiscence	GO:0005515	protein binding	GO:0005634	nucleus
Glyma.01G121700	Only JY93	down	AT3G08920	Rhodanese/Cell cycle control phosphatase superfamily protein		GO:0008150	biological process	GO:0003674	molecular function	GO:0009507 GO:0009534 GO:0009941	chloroplast; chloroplast envelope; chloroplast thylakoid
Glyma.01G122000	Only JY93	down	AT3G11210	SGNH hydrolase-type esterase superfamily protein		GO:0006629	lipid metabolic process	GO:0004091 GO:0016787 GO:0016788	carboxylesterase activity; hydrolase activity; hydrolase activity, acting on ester bonds	GO:0005576 GO:0048046	apoplast; extracellular region
Glyma.01G124000	Only K6	up	AT3G51760	Protein of unknown function (DUF688)		GO:0006863 GO:0008150	biological process; purine nucleobase transport	GO:0003674	molecular function	GO:0005634 GO:0005739	mitochondrion; nucleus
Glyma.01G124500	Only K6	up	AT5G01600	ferretin 1		GO:0000302 GO:0006826 GO:0006879 GO:0009409 GO:0009617 GO:0009908 GO:0010039 GO:0010043 GO:0015979 GO:0042542 GO:0048366 GO:0055072 GO:0055114	cellular iron ion homeostasis; flower development; iron ion homeostasis; iron ion transport; leaf development; oxidation-reduction process; photosynthesis; response to bacterium; response to cold; response to hydrogen peroxide; response to iron ion; response to reactive oxygen species; response to zinc ion	GO:0005506 GO:0008199 GO:0016491 GO:0046914	ferric iron binding; iron ion binding; oxidoreductase activity; transition metal ion binding	GO:0005739 GO:0009507 GO:0009535 GO:0009570 GO:0009579 GO:0016020	chloroplast; chloroplast stroma; chloroplast thylakoid membrane; membrane; mitochondrion; thylakoid
Glyma.01G124700	Only JY93	down	AT2G38310	PYR1-like 4		GO:0009738	abscisic acid mediated signaling pathway	GO:0004872 GO:0005515	protein binding; receptor activity	GO:0005634	nucleus
Glyma.01G127400	Only JY93	up	AT1G58170	Disease resistance-responsive (dirigent-like protein) family protein		GO:0006499 GO:0006952 GO:0009807	N-terminal protein myristoylation; defense response; lignan biosynthetic process	GO:0003674	molecular function	GO:0009507	chloroplast
Glyma.01G131200	Only K6	down	AT5G01790	NA		GO:0008150 GO:0042546	biological process; cell wall biogenesis	GO:0003674	molecular function	GO:0009507	chloroplast
Glyma.01G132500	Only JY93	up	AT5G59310	lipid transfer protein 4		GO:0006869 GO:0009409 GO:0009414 GO:0009651 GO:0009737 GO:0042538	hyperosmotic salinity response; lipid transport; response to abscisic acid stimulus; response to cold; response to salt stress; response to water deprivation	GO:0008289	lipid binding	GO:0005576	extracellular region
Glyma.01G133100	Only K6	up	AT3G50460	homolog of RPW8 2		GO:0051707	response to other organism	GO:0003674	molecular function	GO:0009507	chloroplast
Glyma.01G134300	Only K6	down	NA	NA		NA	NA	NA	NA	NA	NA
Glyma.01G142400	Only JY93	up	NA	NA		NA	NA	NA	NA	NA	NA
Glyma.01G142900	Only K6	up	AT3G60810	NA		GO:0008150	biological process	GO:0003674	molecular function	GO:0005575	cellular component
Glyma.01G144700	Only JY93	up	AT3G60890	protein binding		GO:0008150	biological process	GO:0005515	protein binding	GO:0005739	mitochondrion
Glyma.01G144900	Only JY93	up	AT2G45480	growth-regulating factor 9		GO:0006355 GO:0048366	leaf development; regulation of transcription, DNA-dependent	GO:0005524 GO:0016818	ATP binding; hydrolase activity, acting on acid anhydrides, in phosphorus-containing anhydrides	GO:0005634	nucleus
Glyma.01G146500	Only JY93	up	AT4G28890	RING/U-box superfamily protein		GO:0000041 GO:0016567 GO:0048527 GO:0048589 GO:0048765 GO:0048767	developmental growth; lateral root development; protein ubiquitination; root hair cell differentiation; root hair elongation; transition metal ion transport	GO:0004842 GO:0008270	ubiquitin-protein ligase activity; zinc ion binding	NA	NA
Glyma.01G147700	Only JY93	down	AT5G48790	Domain of unknown function (DUF1995)		GO:0008150 GO:0015979 GO:0019684 GO:0035304	biological process; photosynthesis; photosynthesis, light reaction; regulation of protein dephosphorylation	GO:0003674	molecular function	GO:0009507	chloroplast
Glyma.01G148600	Only JY93	up	AT3G13960	growth-regulating factor 5	GRF	GO:0006355 GO:0009737 GO:0009793 GO:0009845 GO:0009909 GO:0009965 GO:0010162 GO:0016570 GO:0048366 GO:0048449	embryo development ending in seed dormancy; floral organ formation; histone modification; leaf development; leaf morphogenesis; regulation of flower development; regulation of transcription, DNA-dependent; response to abscisic acid stimulus; seed dormancy process; seed germination	GO:0005524 GO:0016818	ATP binding; hydrolase activity, acting on acid anhydrides, in phosphorus-containing anhydrides	GO:0005634	nucleus
Glyma.01G148900	Only JY93	down	AT1G31880	DZC (Disease resistance/zinc finger/chromosome condensation-like region) domain containing protein		GO:0009734 GO:0009736 GO:0009737 GO:0048364 GO:0048527	auxin mediated signaling pathway; cytokinin mediated signaling pathway; lateral root development; response to abscisic acid stimulus; root development	GO:0015250 GO:0042802	identical protein binding; water channel activity	GO:0005634	nucleus
Glyma.01G151600	Only JY93	up	AT4G19420	Pectinacetylesterase family protein		GO:0008150	biological process	GO:0004091	carboxylesterase activity	GO:0005576	extracellular region
Glyma.01G151800	Only JY93	up	AT5G45300	beta-amylase 2	BES1	GO:0000272 GO:0005975 GO:0048831	carbohydrate metabolic process; polysaccharide catabolic process; regulation of shoot system development	GO:0003700 GO:0003824 GO:0016161 GO:0043169	beta-amylase activity; catalytic activity; cation binding; sequence-specific DNA binding transcription factor activity	GO:0005634 GO:0005737	cytoplasm; nucleus
Glyma.01G152000	Only K6	up	AT5G17540	HXXXD-type acyl-transferase family protein		NA	NA	GO:0016747	transferase activity, transferring acyl groups other than amino-acyl groups	GO:0005737	cytoplasm
Glyma.01G152200	Only JY93	up	AT3G47580	Leucine-rich repeat protein kinase family protein		GO:0006468 GO:0007169	protein phosphorylation; transmembrane receptor protein tyrosine kinase signaling pathway	GO:0004672 GO:0004674 GO:0005524 GO:0016301 GO:0016772	ATP binding; kinase activity; protein kinase activity; protein serine/threonine kinase activity; transferase activity, transferring phosphorus-containing groups	GO:0005886	plasma membrane
Glyma.01G153100	Only JY93	up	AT5G45330	decapping 5-like		NA	NA	NA	NA	GO:0009507	chloroplast
Glyma.01G156500	Only JY93	up	NA	NA		NA	NA	NA	NA	NA	NA
Glyma.01G157700	Only JY93	up	AT5G65980	Auxin efflux carrier family protein		GO:0009926 GO:0055085	auxin polar transport; transmembrane transport	GO:0009672	auxin:hydrogen symporter activity	GO:0016021	integral to membrane
Glyma.01G162300	Only K6	up	AT2G17705	NA		GO:0008150	biological process	GO:0003674	molecular function	GO:0005886 GO:0009507	chloroplast; plasma membrane
Glyma.01G162500	Only JY93	down	AT2G17710	NA		GO:0008150	biological process	GO:0003674	molecular function	GO:0005739	mitochondrion
Glyma.01G164000	Only JY93	down	AT4G35920	PLAC8 family protein		GO:0006655 GO:0006816 GO:0007020 GO:0007231 GO:0007638 GO:0019344 GO:0033500	calcium ion transport; carbohydrate homeostasis; cysteine biosynthetic process; mechanosensory behavior; microtubule nucleation; osmosensory signaling pathway; phosphatidylglycerol biosynthetic process	GO:0003674	molecular function	GO:0005886 GO:0005887	integral to plasma membrane; plasma membrane
Glyma.01G165300	Only K6	up	AT2G17850	Rhodanese/Cell cycle control phosphatase superfamily protein		GO:0001666 GO:0007568 GO:0009862 GO:0010089 GO:0010310 GO:0044036	aging; cell wall macromolecule metabolic process; regulation of hydrogen peroxide metabolic process; response to hypoxia; systemic acquired resistance, salicylic acid mediated signaling pathway; xylem development	GO:0003674	molecular function	GO:0009507	chloroplast
Glyma.01G165900	Only K6	up	AT5G66200	armadillo repeat only 2		GO:0008150	biological process	NA	NA	GO:0005737 GO:0005886	cytoplasm; plasma membrane
Glyma.01G167000	Only JY93	down	AT2G21220	SAUR-like auxin-responsive protein family		GO:0009733	response to auxin stimulus	GO:0005516	calmodulin binding	GO:0005739	mitochondrion
Glyma.01G167900	Only JY93	up	AT2G18060	vascular related NAC-domain protein 1	NAC	GO:0006355 GO:0009741 GO:0010089 GO:0010200	regulation of transcription, DNA-dependent; response to brassinosteroid stimulus; response to chitin; xylem development	GO:0003677 GO:0003700	DNA binding; sequence-specific DNA binding transcription factor activity	GO:0005634	nucleus
Glyma.01G168200	Only JY93	up	AT3G51150	ATP binding microtubule motor family protein		GO:0007018	microtubule-based movement	GO:0003777 GO:0005524	ATP binding; microtubule motor activity	GO:0005737	cytoplasm
Glyma.01G169000	Only K6	up	AT2G18090	PHD finger family protein / SWIB complex BAF60b domain-containing protein / GYF domain-containing protein		GO:0006355	regulation of transcription, DNA-dependent	GO:0003677 GO:0008270	DNA binding; zinc ion binding	GO:0005634	nucleus
Glyma.01G170200	Only K6	down	AT4G36360	beta-galactosidase 3		GO:0005975 GO:0005990 GO:0006598 GO:0009664 GO:0009698 GO:0009832 GO:0010075 GO:0019513 GO:0019515 GO:0042398	carbohydrate metabolic process; cellular modified amino acid biosynthetic process; lactose catabolic process; lactose catabolic process, using glucoside 3-dehydrogenase; lactose catabolic process via UDP-galactose; phenylpropanoid metabolic process; plant-type cell wall biogenesis; plant-type cell wall organization; polyamine catabolic process; regulation of meristem growth	GO:0003824 GO:0004553 GO:0004565 GO:0030246 GO:0043169	beta-galactosidase activity; carbohydrate binding; catalytic activity; cation binding; hydrolase activity, hydrolyzing O-glycosyl compounds	GO:0005576	extracellular region
Glyma.01G171300	Only K6	up	AT2G18193	P-loop containing nucleoside triphosphate hydrolases superfamily protein		NA	NA	GO:0000166 GO:0005524 GO:0016887 GO:0017111	ATP binding; ATPase activity; nucleoside-triphosphatase activity; nucleotide binding	GO:0005783	endoplasmic reticulum
Glyma.01G171800	Only K6	up	AT5G66450	Phosphatidic acid phosphatase (PAP2) family protein		GO:0006464 GO:0006651	cellular protein modification process; diacylglycerol biosynthetic process	GO:0003824 GO:0008195 GO:0008474	catalytic activity; palmitoyl-(protein) hydrolase activity; phosphatidate phosphatase activity	GO:0009507 GO:0016020	chloroplast; membrane
Glyma.01G172700	Only K6	down	AT1G75280	NmrA-like negative transcriptional regulator family protein		GO:0006979 GO:0046686	response to cadmium ion; response to oxidative stress	GO:0000166	nucleotide binding	GO:0005737 GO:0005886	cytoplasm; plasma membrane
Glyma.01G175300	Only JY93	up	AT5G66750	chromatin remodeling 1		GO:0006342 GO:0006344 GO:0006346 GO:0006349 GO:0008283 GO:0009294 GO:0016246 GO:0016572 GO:0031048 GO:0032197 GO:0044030 GO:0051567 GO:0051574 GO:0090241	DNA mediated transformation; RNA interference; cell proliferation; chromatin silencing; chromatin silencing by small RNA; histone H3-K9 methylation; histone phosphorylation; maintenance of chromatin silencing; methylation-dependent chromatin silencing; negative regulation of histone H4 acetylation; positive regulation of histone H3-K9 methylation; regulation of DNA methylation; regulation of gene…	GO:0003676 GO:0003677 GO:0004003 GO:0004386 GO:0005515 GO:0005524 GO:0016887	ATP-dependent DNA helicase activity; ATP binding; ATPase activity; DNA binding; helicase activity; nucleic acid binding; protein binding	GO:0000786 GO:0005634	nucleosome; nucleus
Glyma.01G175500	Only JY93	up	AT3G50660	Cytochrome P450 superfamily protein		GO:0009741 GO:0009753 GO:0009826 GO:0009867 GO:0010358 GO:0016126 GO:0016132 GO:0048366 GO:0055114	brassinosteroid biosynthetic process; jasmonic acid mediated signaling pathway; leaf development; leaf shaping; oxidation-reduction process; response to brassinosteroid stimulus; response to jasmonic acid stimulus; sterol biosynthetic process; unidimensional cell growth	GO:0005506 GO:0009055 GO:0010012 GO:0016705 GO:0020037	electron carrier activity; heme binding; iron ion binding; oxidoreductase activity, acting on paired donors, with incorporation or reduction of molecular oxygen; steroid 22-alpha hydroxylase activity	GO:0005783	endoplasmic reticulum
Glyma.01G175800	Only K6	up	NA	NA		NA	NA	NA	NA	NA	NA
Glyma.01G177700	Only JY93	down	AT4G36760	aminopeptidase P1		GO:0006487 GO:0006869 GO:0006891 GO:0009926 GO:0009987 GO:0010351 GO:0016558	auxin polar transport; cellular process; intra-Golgi vesicle-mediated transport; lipid transport; lithium ion transport; protein N-linked glycosylation; protein import into peroxisome matrix	GO:0004177 GO:0010013 GO:0016787	N-1-naphthylphthalamic acid binding; aminopeptidase activity; hydrolase activity	GO:0005829 GO:0005886	cytosol; plasma membrane
Glyma.01G178500	Only JY93	up	AT2G23790	Protein of unknown function (DUF607)		GO:0008150	biological process	GO:0003674	molecular function	GO:0009507	chloroplast
Glyma.01G179000	Only K6	up	AT2G23770	protein kinase family protein / peptidoglycan-binding LysM domain-containing protein		GO:0045087 GO:0071219 GO:0071323	cellular response to chitin; cellular response to molecule of bacterial origin; innate immune response	GO:0008061 GO:0016301	chitin binding; kinase activity	GO:0005886 GO:0009507	chloroplast; plasma membrane
Glyma.01G179400	Only JY93	up	AT3G26300	cytochrome P450, family 71, subfamily B, polypeptide 34		GO:0055114	oxidation-reduction process	GO:0005506 GO:0009055 GO:0016705 GO:0019825 GO:0020037	electron carrier activity; heme binding; iron ion binding; oxidoreductase activity, acting on paired donors, with incorporation or reduction of molecular oxygen; oxygen binding	NA	NA
Glyma.01G180000	Only JY93	down	AT3G50780	NA		GO:0008150	biological process	NA	NA	GO:0005634	nucleus
Glyma.01G180500	Only K6	up	AT2G23690	NA		GO:0006499	N-terminal protein myristoylation	GO:0003674	molecular function	GO:0005575	cellular component
Glyma.01G181900	Only K6	down	AT4G31940	cytochrome P450, family 82, subfamily C, polypeptide 4		GO:0010043 GO:0055114 GO:0071281	cellular response to iron ion; oxidation-reduction process; response to zinc ion	GO:0004497 GO:0005506 GO:0009055 GO:0016705 GO:0019825 GO:0020037	electron carrier activity; heme binding; iron ion binding; monooxygenase activity; oxidoreductase activity, acting on paired donors, with incorporation or reduction of molecular oxygen; oxygen binding	GO:0009507	chloroplast
Glyma.01G182400	Only JY93	up	AT2G23450	Protein kinase superfamily protein		GO:0006468	protein phosphorylation	GO:0004672 GO:0004674 GO:0005524 GO:0016301 GO:0016772	ATP binding; kinase activity; protein kinase activity; protein serine/threonine kinase activity; transferase activity, transferring phosphorus-containing groups	GO:0005575	cellular component
Glyma.01G183300	Only K6	up	AT5G66900	Disease resistance protein (CC-NBS-LRR class) family		GO:0006952	defense response	GO:0043531	ADP binding	GO:0005634	nucleus
Glyma.01G183400	Only K6	up	AT5G66900	Disease resistance protein (CC-NBS-LRR class) family		GO:0006952	defense response	GO:0043531	ADP binding	GO:0005634	nucleus
Glyma.01G184200	Only K6	down	AT1G49570	Peroxidase superfamily protein		GO:0006979 GO:0055114	oxidation-reduction process; response to oxidative stress	GO:0004601 GO:0020037	heme binding; peroxidase activity	GO:0005576	extracellular region
Glyma.01G185200	Only K6	up	AT3G50620	P-loop containing nucleoside triphosphate hydrolases superfamily protein		NA	NA	GO:0008146	sulfotransferase activity	GO:0005575	cellular component
Glyma.01G185800	Only K6	up	AT4G36990	heat shock factor 4	HSF	GO:0006355 GO:0006984 GO:0009407 GO:0009408 GO:0009414 GO:0009737 GO:0010583 GO:0030968 GO:0034976 GO:0042538 GO:0045892	ER-nucleus signaling pathway; endoplasmic reticulum unfolded protein response; hyperosmotic salinity response; negative regulation of transcription, DNA-dependent; regulation of transcription, DNA-dependent; response to abscisic acid stimulus; response to cyclopentenone; response to endoplasmic reticulum stress; response to heat; response to water deprivation; toxin catabolic process	GO:0003677 GO:0003700 GO:0043565	DNA binding; sequence-specific DNA binding; sequence-specific DNA binding transcription factor activity	GO:0005634	nucleus
Glyma.01G186900	Only K6	up	AT4G36950	mitogen-activated protein kinase kinase kinase 21		GO:0006468	protein phosphorylation	GO:0004672 GO:0004674 GO:0005524 GO:0016772	ATP binding; protein kinase activity; protein serine/threonine kinase activity; transferase activity, transferring phosphorus-containing groups	GO:0005886	plasma membrane
Glyma.01G187700	Only JY93	up	AT4G34050	S-adenosyl-L-methionine-dependent methyltransferases superfamily protein		GO:0006598 GO:0009611 GO:0009698 GO:0009805 GO:0009963 GO:0019344 GO:0042398 GO:0046686	cellular modified amino acid biosynthetic process; coumarin biosynthetic process; cysteine biosynthetic process; phenylpropanoid metabolic process; polyamine catabolic process; positive regulation of flavonoid biosynthetic process; response to cadmium ion; response to wounding	GO:0008171 GO:0042409	O-methyltransferase activity; caffeoyl-CoA O-methyltransferase activity	GO:0005634 GO:0005829	cytosol; nucleus
Glyma.01G187800	Only JY93	down	AT5G67140	F-box/RNI-like superfamily protein		NA	NA	NA	NA	GO:0005737	cytoplasm
Glyma.01G188400	Only K6	down	AT4G36920	Integrase-type DNA-binding superfamily protein	AP2	GO:0006355 GO:0009888 GO:0009908 GO:0010073 GO:0010093 GO:0019953 GO:0030154 GO:0048316 GO:0048481	cell differentiation; flower development; meristem maintenance; ovule development; regulation of transcription, DNA-dependent; seed development; sexual reproduction; specification of floral organ identity; tissue development	GO:0003677 GO:0003700	DNA binding; sequence-specific DNA binding transcription factor activity	GO:0005634	nucleus
Glyma.01G188600	Only K6	down	AT3G50260	cooperatively regulated by ethylene and jasmonate 1	ERF	GO:0002679 GO:0006355 GO:0009409 GO:0009414 GO:0009611 GO:0009617 GO:0009737 GO:0009738 GO:0010200 GO:0010941 GO:0035556 GO:0042538 GO:0042742	abscisic acid mediated signaling pathway; defense response to bacterium; hyperosmotic salinity response; intracellular signal transduction; regulation of cell death; regulation of transcription, DNA-dependent; respiratory burst involved in defense response; response to abscisic acid stimulus; response to bacterium; response to chitin; response to cold; response to water deprivation; response to w…	GO:0003677 GO:0003700	DNA binding; sequence-specific DNA binding transcription factor activity	GO:0005634	nucleus
Glyma.01G190900	Only JY93	up	AT4G37450	arabinogalactan protein _x005f_x005f_x005f_x0001_18		NA	NA	NA	NA	GO:0005886 GO:0031225	anchored to membrane; plasma membrane
Glyma.01G191200	Only JY93	down	AT4G37470	alpha/beta-Hydrolases superfamily protein		GO:0009640 GO:0009704 GO:0009744 GO:0009813 GO:0010224 GO:0080167	de-etiolation; flavonoid biosynthetic process; photomorphogenesis; response to UV-B; response to karrikin; response to sucrose stimulus	GO:0016787	hydrolase activity	GO:0005737	cytoplasm
Glyma.01G191300	Only K6	up	AT4G33920	Protein phosphatase 2C family protein		GO:0006470 GO:0006612 GO:0006944 GO:0010200 GO:0010363 GO:0030968 GO:0043069 GO:0052542	cellular membrane fusion; defense response by callose deposition; endoplasmic reticulum unfolded protein response; negative regulation of programmed cell death; protein dephosphorylation; protein targeting to membrane; regulation of plant-type hypersensitive response; response to chitin	GO:0003824 GO:0004722	catalytic activity; protein serine/threonine phosphatase activity	NA	NA
Glyma.01G192400	Only JY93	down	AT5G67390	NA		GO:0008150	biological process	GO:0003674	molecular function	GO:0005575	cellular component
Glyma.01G195300	Only K6	up	AT2G22880	VQ motif-containing protein		GO:0010224	response to UV-B	GO:0003674	molecular function	GO:0005634	nucleus
Glyma.01G195700	Only K6	up	AT2G22860	phytosulfokine 2 precursor		GO:0008283 GO:0009887 GO:0030154	cell differentiation; cell proliferation; organ morphogenesis	GO:0008083	growth factor activity	GO:0005576 GO:0031012	extracellular matrix; extracellular region
Glyma.01G196800	Only JY93	up	AT5G65730	xyloglucan endotransglucosylase/hydrolase 6		GO:0005975 GO:0006073 GO:0009269 GO:0009409 GO:0009414 GO:0009651 GO:0009737	carbohydrate metabolic process; cellular glucan metabolic process; response to abscisic acid stimulus; response to cold; response to desiccation; response to salt stress; response to water deprivation	GO:0004553 GO:0016762 GO:0016798	hydrolase activity, acting on glycosyl bonds; hydrolase activity, hydrolyzing O-glycosyl compounds; xyloglucan:xyloglucosyl transferase activity	GO:0005576 GO:0005618 GO:0048046	apoplast; cell wall; extracellular region
Glyma.01G199600	Only K6	up	AT2G35350	poltergeist like 1		GO:0006355 GO:0006499 GO:0009826 GO:0009933 GO:0010074 GO:0018345 GO:0018377	N-terminal protein myristoylation; maintenance of meristem identity; meristem structural organization; protein myristoylation; protein palmitoylation; regulation of transcription, DNA-dependent; unidimensional cell growth	GO:0003824 GO:0004722 GO:0005543	catalytic activity; phospholipid binding; protein serine/threonine phosphatase activity	GO:0005634 GO:0005886	nucleus; plasma membrane
Glyma.01G200500	Only JY93	up	AT4G18010	myo-inositol polyphosphate 5-phosphatase 2		GO:0007165 GO:0009414 GO:0009611 GO:0009723 GO:0009733 GO:0009737 GO:0009738 GO:0009753 GO:0009845 GO:0032957 GO:0042538 GO:0046854 GO:0046855 GO:0052542	abscisic acid mediated signaling pathway; defense response by callose deposition; hyperosmotic salinity response; inositol phosphate dephosphorylation; inositol trisphosphate metabolic process; phosphatidylinositol phosphorylation; response to abscisic acid stimulus; response to auxin stimulus; response to ethylene stimulus; response to jasmonic acid stimulus; response to water deprivation; respo…	GO:0004445	inositol-polyphosphate 5-phosphatase activity	GO:0005737	cytoplasm
Glyma.01G202200	Only K6	up	AT2G45760	BON association protein 2		GO:0008150 GO:0009627 GO:0009693 GO:0009697	biological process; ethylene biosynthetic process; salicylic acid biosynthetic process; systemic acquired resistance	GO:0003674	molecular function	GO:0005575	cellular component
Glyma.01G204400	Only K6	up	AT1G74950	TIFY domain/Divergent CCT motif family protein		GO:0006612 GO:0007165 GO:0009414 GO:0009611 GO:0009620 GO:0009695 GO:0009723 GO:0009733 GO:0009738 GO:0009753 GO:0009863 GO:0009867 GO:0010363 GO:0042538 GO:0043069	abscisic acid mediated signaling pathway; hyperosmotic salinity response; jasmonic acid biosynthetic process; jasmonic acid mediated signaling pathway; negative regulation of programmed cell death; protein targeting to membrane; regulation of plant-type hypersensitive response; response to auxin stimulus; response to ethylene stimulus; response to fungus; response to jasmonic acid stimulus; respo…	GO:0005515	protein binding	GO:0005634	nucleus
Glyma.01G205900	Only K6	up	AT4G16820	alpha/beta-Hydrolases superfamily protein		GO:0006629 GO:0009693	ethylene biosynthetic process; lipid metabolic process	GO:0004806 GO:0008970 GO:0047714	galactolipase activity; phosphatidylcholine 1-acylhydrolase activity; triglyceride lipase activity	GO:0009507	chloroplast
Glyma.01G211300	Only JY93	down	AT1G62770	Plant invertase/pectin methylesterase inhibitor superfamily protein		GO:0010014 GO:0010089	meristem initiation; xylem development	GO:0004857 GO:0030599 GO:0046910	enzyme inhibitor activity; pectinesterase activity; pectinesterase inhibitor activity	NA	NA
Glyma.01G211800	Only JY93	up	AT4G39230	NmrA-like negative transcriptional regulator family protein		GO:0046686	response to cadmium ion	GO:0000166 GO:0032442	nucleotide binding; phenylcoumaran benzylic ether reductase activity	GO:0005737	cytoplasm
Glyma.01G212100	Only K6	up	AT3G60780	Protein of unknown function (DUF1442)		GO:0008150	biological process	GO:0003674	molecular function	NA	NA
Glyma.01G212800	Only K6	up	AT1G12420	ACT domain repeat 8		GO:0008152 GO:0009737	metabolic process; response to abscisic acid stimulus	GO:0016597	amino acid binding	GO:0005575	cellular component
Glyma.01G215500	Only K6	up	AT4G11820	hydroxymethylglutaryl-CoA synthase / HMG-CoA synthase / 3-hydroxy-3-methylglutaryl coenzyme A synthas		GO:0006084 GO:0008152 GO:0008299 GO:0019287	acetyl-CoA metabolic process; isopentenyl diphosphate biosynthetic process, mevalonate pathway; isoprenoid biosynthetic process; metabolic process	GO:0003824 GO:0004421	catalytic activity; hydroxymethylglutaryl-CoA synthase activity	GO:0005739 GO:0005829 GO:0009506	cytosol; mitochondrion; plasmodesma
Glyma.01G217400	Only K6	down	AT4G11660	winged-helix DNA-binding transcription factor family protein	HSF	GO:0006355 GO:0009408 GO:0009644 GO:0010200 GO:0042542 GO:0045892	negative regulation of transcription, DNA-dependent; regulation of transcription, DNA-dependent; response to chitin; response to heat; response to high light intensity; response to hydrogen peroxide	GO:0003700 GO:0043565	sequence-specific DNA binding; sequence-specific DNA binding transcription factor activity	GO:0005634	nucleus
Glyma.01G217600	Only JY93	up	AT4G11650	osmotin 34		GO:0009651 GO:0009816 GO:0009817 GO:0051707	defense response to bacterium, incompatible interaction; defense response to fungus, incompatible interaction; response to other organism; response to salt stress	NA	NA	GO:0005576	extracellular region
Glyma.01G218200	Only JY93	up	AT1G63410	Protein of unknown function (DUF567)		GO:0008150	biological process	GO:0003674	molecular function	GO:0005634	nucleus
Glyma.01G218500	Only JY93	up	AT2G41190	Transmembrane amino acid transporter family protein		GO:0006865	amino acid transport	GO:0015171	amino acid transmembrane transporter activity	GO:0005774 GO:0005886 GO:0016020	membrane; plasma membrane; vacuolar membrane
Glyma.01G218600	Only JY93	up	AT2G41190	Transmembrane amino acid transporter family protein		GO:0006865	amino acid transport	GO:0015171	amino acid transmembrane transporter activity	GO:0005774 GO:0005886 GO:0016020	membrane; plasma membrane; vacuolar membrane
Glyma.01G220600	Only K6	down	AT4G00430	plasma membrane intrinsic protein 1;4		GO:0006810 GO:0006826 GO:0006833 GO:0009414 GO:0010106	cellular response to iron ion starvation; iron ion transport; response to water deprivation; transport; water transport	GO:0005215 GO:0015250	transporter activity; water channel activity	GO:0005886 GO:0016020 GO:0016021	integral to membrane; membrane; plasma membrane
Glyma.01G220800	Only K6	up	AT5G52430	hydroxyproline-rich glycoprotein family protein		GO:0008150	biological process	GO:0003674	molecular function	GO:0005634	nucleus
Glyma.01G221300	Only K6	up	AT3G61460	brassinosteroid-responsive RING-H2		GO:0009741 GO:0010200 GO:0030003 GO:0070838	cellular cation homeostasis; divalent metal ion transport; response to brassinosteroid stimulus; response to chitin	GO:0008270	zinc ion binding	GO:0005634	nucleus
Glyma.01G222700	Only JY93	up	AT1G64060	respiratory burst oxidase protein F		GO:0000165 GO:0002679 GO:0006612 GO:0006952 GO:0007154 GO:0007165 GO:0007231 GO:0009409 GO:0009414 GO:0009611 GO:0009627 GO:0009697 GO:0009723 GO:0009733 GO:0009737 GO:0009738 GO:0009753 GO:0009862 GO:0009867 GO:0009873 GO:0010119 GO:0010228 GO:0010363 GO:0016926 GO:0030968 GO:0031348 GO:0033500 GO:0035556 GO:0042538 GO:0043069 GO:0050665 GO:0050832 GO:0052542 GO:0072593	MAPK cascade; abscisic acid mediated signaling pathway; carbohydrate homeostasis; cell communication; defense response; defense response by callose deposition; defense response to fungus; endoplasmic reticulum unfolded protein response; ethylene mediated signaling pathway; hydrogen peroxide biosynthetic process; hyperosmotic salinity response; intracellular signal transduction; jasmonic acid medi…	GO:0004601 GO:0005506 GO:0005509 GO:0009055 GO:0016174 GO:0016491 GO:0050660 GO:0050664	NAD(P)H oxidase activity; calcium ion binding; electron carrier activity; flavin adenine dinucleotide binding; iron ion binding; oxidoreductase activity; oxidoreductase activity, acting on NAD(P)H, oxygen as acceptor; peroxidase activity	GO:0005886 GO:0005887	integral to plasma membrane; plasma membrane
Glyma.01G223600	Only K6	up	AT5G41610	cation/H+ exchanger 18		GO:0006812 GO:0006885 GO:0035725 GO:0055085	cation transport; regulation of pH; sodium ion transmembrane transport; transmembrane transport	GO:0005451 GO:0015299 GO:0015385	monovalent cation:hydrogen antiporter activity; sodium:hydrogen antiporter activity; solute:hydrogen antiporter activity	GO:0005770 GO:0009507 GO:0016021	chloroplast; integral to membrane; late endosome
Glyma.01G223900	Only JY93	up	AT4G23730	Galactose mutarotase-like superfamily protein		GO:0005975 GO:0006012	carbohydrate metabolic process; galactose metabolic process	GO:0003824 GO:0004034 GO:0016853 GO:0030246	aldose 1-epimerase activity; carbohydrate binding; catalytic activity; isomerase activity	GO:0005634	nucleus
Glyma.01G224800	Only K6	up	AT4G11070	WRKY family transcription factor	WRKY	GO:0006355	regulation of transcription, DNA-dependent	GO:0003700 GO:0043565	sequence-specific DNA binding; sequence-specific DNA binding transcription factor activity	GO:0005634	nucleus
Glyma.01G225100	Only JY93	up	AT2G29380	highly ABA-induced PP2C gene 3		GO:0006470	protein dephosphorylation	GO:0003824 GO:0004722	catalytic activity; protein serine/threonine phosphatase activity	GO:0005886 GO:0008287	plasma membrane; protein serine/threonine phosphatase complex
Glyma.01G225500	Only JY93	down	AT4G23880	NA		GO:0008150	biological process	GO:0003674	molecular function	GO:0005634	nucleus
Glyma.01G227500	Only K6	down	NA	NA		NA	NA	NA	NA	NA	NA
Glyma.01G228700	Only JY93	up	AT5G13930	Chalcone and stilbene synthase family protein		GO:0006979 GO:0008152 GO:0009058 GO:0009411 GO:0009611 GO:0009629 GO:0009715 GO:0009718 GO:0009733 GO:0009744 GO:0009753 GO:0009813 GO:0009926 GO:0010224 GO:0031540	anthocyanin-containing compound biosynthetic process; auxin polar transport; biosynthetic process; chalcone biosynthetic process; flavonoid biosynthetic process; metabolic process; regulation of anthocyanin biosynthetic process; response to UV; response to UV-B; response to auxin stimulus; response to gravity; response to jasmonic acid stimulus; response to oxidative stress; response to sucrose s…	GO:0003824 GO:0005515 GO:0016210 GO:0016746 GO:0016747	catalytic activity; naringenin-chalcone synthase activity; protein binding; transferase activity, transferring acyl groups; transferase activity, transferring acyl groups other than amino-acyl groups	GO:0005634 GO:0005737 GO:0005783 GO:0009705	cytoplasm; endoplasmic reticulum; nucleus; plant-type vacuole membrane
Glyma.01G229000	Only K6	up	AT3G03120	ADP-ribosylation factor B1C		GO:0006499 GO:0007264	N-terminal protein myristoylation; small GTPase mediated signal transduction	GO:0005525	GTP binding	GO:0005622 GO:0005794	Golgi apparatus; intracellular
Glyma.01G230900	Only JY93	up	AT4G10040	cytochrome c-2		NA	NA	GO:0005506 GO:0005507 GO:0009055 GO:0020037	copper ion binding; electron carrier activity; heme binding; iron ion binding	GO:0005739	mitochondrion
Glyma.01G231600	Only JY93	up	AT4G10030	alpha/beta-Hydrolases superfamily protein		NA	NA	GO:0016787	hydrolase activity	NA	NA
Glyma.01G232500	Only JY93	down	AT3G03050	cellulose synthase-like D3		GO:0000271 GO:0009409 GO:0009832 GO:0010583 GO:0030244	cellulose biosynthetic process; plant-type cell wall biogenesis; polysaccharide biosynthetic process; response to cold; response to cyclopentenone	GO:0016757 GO:0016759 GO:0051753	cellulose synthase activity; mannan synthase activity; transferase activity, transferring glycosyl groups	GO:0005768 GO:0005783 GO:0005794 GO:0005802 GO:0005886 GO:0016020	Golgi apparatus; endoplasmic reticulum; endosome; membrane; plasma membrane; trans-Golgi network
Glyma.01G234500	Only K6	up	AT1G64980	Nucleotide-diphospho-sugar transferases superfamily protein		GO:0009846 GO:0009860	pollen germination; pollen tube growth	NA	NA	GO:0005634 GO:0005829	cytosol; nucleus
Glyma.01G234600	Only JY93	up	AT5G43630	zinc knuckle (CCHC-type) family protein		GO:0006352 GO:0006355 GO:0016570 GO:0040007	DNA-dependent transcription, initiation; growth; histone modification; regulation of transcription, DNA-dependent	GO:0003676 GO:0003677 GO:0008270	DNA binding; nucleic acid binding; zinc ion binding	GO:0005634	nucleus
Glyma.01G236200	Only K6	up	AT1G63060	NA		GO:0008150	biological process	GO:0003674	molecular function	GO:0005739	mitochondrion
Glyma.01G236500	Only K6	up	AT2G32020	Acyl-CoA N-acyltransferases (NAT) superfamily protein		GO:0008152 GO:0009737	metabolic process; response to abscisic acid stimulus	GO:0008080	N-acetyltransferase activity	GO:0005737	cytoplasm
Glyma.01G237000	Only K6	down	AT3G22540	Protein of unknown function (DUF1677)		GO:0008150	biological process	GO:0003674	molecular function	NA	NA
Glyma.01G238800	Only JY93	up	AT5G26340	Major facilitator superfamily protein		GO:0009414 GO:0009651 GO:0009737 GO:0015749 GO:0016310 GO:0043090	amino acid import; monosaccharide transport; phosphorylation; response to abscisic acid stimulus; response to salt stress; response to water deprivation	GO:0005351 GO:0005358 GO:0009679 GO:0015144 GO:0015145	carbohydrate transmembrane transporter activity; hexose:hydrogen symporter activity; high-affinity hydrogen:glucose symporter activity; monosaccharide transmembrane transporter activity; sugar:hydrogen symporter activity	GO:0005737 GO:0005886 GO:0009506 GO:0016020	cytoplasm; membrane; plasma membrane; plasmodesma
Glyma.01G239300	Only K6	up	AT1G47480	alpha/beta-Hydrolases superfamily protein		GO:0008152 GO:0048765	metabolic process; root hair cell differentiation	GO:0016787	hydrolase activity	GO:0005634	nucleus
Glyma.01G239600	Only JY93	up	AT1G47480	alpha/beta-Hydrolases superfamily protein		GO:0008152 GO:0048765	metabolic process; root hair cell differentiation	GO:0016787	hydrolase activity	GO:0005634	nucleus
Glyma.01G241200	Only K6	up	AT1G10020	Protein of unknown function (DUF1005)		GO:0008150	biological process	GO:0003674	molecular function	GO:0005634	nucleus
Glyma.01G241600	Only JY93	down	AT2G14660	NA		GO:0008150	biological process	GO:0003674	molecular function	GO:0005634	nucleus
Glyma.01G242000	Only JY93	down	AT3G19640	magnesium transporter 4		GO:0009644 GO:0030001 GO:0042542 GO:0055085	metal ion transport; response to high light intensity; response to hydrogen peroxide; transmembrane transport	GO:0015095 GO:0046873	magnesium ion transmembrane transporter activity; metal ion transmembrane transporter activity	GO:0005634 GO:0005886 GO:0016020	membrane; nucleus; plasma membrane
Glyma.01G242700	Only JY93	up	AT1G80133	NA		NA	NA	NA	NA	GO:0005576	extracellular region
Glyma.01G245700	Only JY93	down	AT1G76700	DNAJ heat shock N-terminal domain-containing protein		GO:0006457 GO:0030968 GO:0048193 GO:0048527	Golgi vesicle transport; endoplasmic reticulum unfolded protein response; lateral root development; protein folding	GO:0031072 GO:0051082	heat shock protein binding; unfolded protein binding	GO:0005737	cytoplasm
Glyma.02G000800	Only K6	up	AT5G43650	basic helix-loop-helix (bHLH) DNA-binding superfamily protein	bHLH	GO:0006355	regulation of transcription, DNA-dependent	GO:0003677 GO:0003700	DNA binding; sequence-specific DNA binding transcription factor activity	GO:0005634	nucleus
Glyma.02G001100	Only K6	up	AT5G17540	HXXXD-type acyl-transferase family protein		NA	NA	GO:0016747	transferase activity, transferring acyl groups other than amino-acyl groups	GO:0005737	cytoplasm
Glyma.02G004500	Only K6	down	NA	NA		NA	NA	NA	NA	NA	NA
Glyma.02G004600	Only K6	down	AT4G14750	IQ-domain 19		NA	NA	GO:0005516	calmodulin binding	GO:0005634	nucleus
Glyma.02G005600	Only K6	up	AT3G23250	myb domain protein 15	MYB	GO:0002679 GO:0006355 GO:0007165 GO:0009414 GO:0009611 GO:0009651 GO:0009695 GO:0009723 GO:0009733 GO:0009737 GO:0009738 GO:0009753 GO:0009867 GO:0009873 GO:0010200 GO:0035556 GO:0042538 GO:0046686 GO:0052542	abscisic acid mediated signaling pathway; defense response by callose deposition; ethylene mediated signaling pathway; hyperosmotic salinity response; intracellular signal transduction; jasmonic acid biosynthetic process; jasmonic acid mediated signaling pathway; regulation of transcription, DNA-dependent; respiratory burst involved in defense response; response to abscisic acid stimulus; respons…	GO:0003677 GO:0003700	DNA binding; sequence-specific DNA binding transcription factor activity	GO:0005634	nucleus
Glyma.02G006200	Only JY93	up	AT3G23240	ethylene response factor 1	ERF	GO:0006355 GO:0006952 GO:0009867 GO:0009873	defense response; ethylene mediated signaling pathway; jasmonic acid mediated signaling pathway; regulation of transcription, DNA-dependent	GO:0003677 GO:0003700	DNA binding; sequence-specific DNA binding transcription factor activity	GO:0005634	nucleus
Glyma.02G008500	Only K6	up	AT3G62220	Protein kinase superfamily protein		GO:0006468	protein phosphorylation	GO:0004672 GO:0004674 GO:0005524 GO:0016301 GO:0016772	ATP binding; kinase activity; protein kinase activity; protein serine/threonine kinase activity; transferase activity, transferring phosphorus-containing groups	GO:0005737	cytoplasm
Glyma.02G008900	Only K6	up	AT3G21770	Peroxidase superfamily protein		GO:0006979 GO:0055114	oxidation-reduction process; response to oxidative stress	GO:0004601 GO:0016757 GO:0020037	heme binding; peroxidase activity; transferase activity, transferring glycosyl groups	GO:0005576 GO:0005618 GO:0005634 GO:0005737 GO:0009505 GO:0009506	cell wall; cytoplasm; extracellular region; nucleus; plant-type cell wall; plasmodesma
Glyma.02G009100	Only K6	up	AT3G62260	Protein phosphatase 2C family protein		GO:0006470 GO:0010200	protein dephosphorylation; response to chitin	GO:0003824 GO:0004722	catalytic activity; protein serine/threonine phosphatase activity	GO:0005739 GO:0008287	mitochondrion; protein serine/threonine phosphatase complex
Glyma.02G009400	Only K6	up	NA	NA		NA	NA	NA	NA	NA	NA
Glyma.02G009800	Only K6	up	AT2G47190	myb domain protein 2	MYB	GO:0007165 GO:0009409 GO:0009414 GO:0009611 GO:0009651 GO:0009723 GO:0009733 GO:0009737 GO:0009738 GO:0009751 GO:0009753 GO:0010260 GO:0016036 GO:0042538 GO:0045893 GO:0046686	abscisic acid mediated signaling pathway; cellular response to phosphate starvation; hyperosmotic salinity response; organ senescence; positive regulation of transcription, DNA-dependent; response to abscisic acid stimulus; response to auxin stimulus; response to cadmium ion; response to cold; response to ethylene stimulus; response to jasmonic acid stimulus; response to salicylic acid stimulus; …	GO:0001046 GO:0003677 GO:0003700 GO:0005516	DNA binding; calmodulin binding; core promoter sequence-specific DNA binding; sequence-specific DNA binding transcription factor activity	GO:0005634	nucleus
Glyma.02G010900	Only K6	up	AT2G47260	WRKY DNA-binding protein 23	WRKY	GO:0006355 GO:0009624 GO:0009733	regulation of transcription, DNA-dependent; response to auxin stimulus; response to nematode	GO:0003700 GO:0043565	sequence-specific DNA binding; sequence-specific DNA binding transcription factor activity	GO:0005634	nucleus
Glyma.02G013000	Only JY93	down	AT1G02610	RING/FYVE/PHD zinc finger superfamily protein		NA	NA	GO:0008270	zinc ion binding	GO:0005737	cytoplasm
Glyma.02G013700	Only K6	up	AT1G02660	alpha/beta-Hydrolases superfamily protein		GO:0006629	lipid metabolic process	GO:0004806	triglyceride lipase activity	GO:0005576	extracellular region
Glyma.02G015000	Only K6	up	NA	NA		NA	NA	NA	NA	NA	NA
Glyma.02G016100	Only K6	up	AT3G16770	ethylene-responsive element binding protein	ERF	GO:0006355 GO:0008219 GO:0009723 GO:0009735 GO:0009753 GO:0009873 GO:0010286 GO:0045893 GO:0051707	cell death; ethylene mediated signaling pathway; heat acclimation; positive regulation of transcription, DNA-dependent; regulation of transcription, DNA-dependent; response to cytokinin stimulus; response to ethylene stimulus; response to jasmonic acid stimulus; response to other organism	GO:0003677 GO:0003700 GO:0005515	DNA binding; protein binding; sequence-specific DNA binding transcription factor activity	GO:0005634 GO:0005737 GO:0005886	cytoplasm; nucleus; plasma membrane
Glyma.02G017700	Only JY93	down	NA	NA		NA	NA	NA	NA	NA	NA
Glyma.02G021400	Only K6	up	AT5G62740	SPFH/Band 7/PHB domain-containing membrane-associated protein family		GO:0006499	N-terminal protein myristoylation	GO:0005515 GO:0043424	protein binding; protein histidine kinase binding	GO:0005773 GO:0005774 GO:0005794 GO:0005886 GO:0009506 GO:0016020	Golgi apparatus; membrane; plasma membrane; plasmodesma; vacuolar membrane; vacuole
Glyma.02G021600	Only K6	down	AT1G07040	NA		GO:0008150	biological process	NA	NA	GO:0009507	chloroplast
Glyma.02G024200	Only K6	up	AT1G27100	Actin cross-linking protein		GO:0006612 GO:0008150 GO:0009963 GO:0010363	biological process; positive regulation of flavonoid biosynthetic process; protein targeting to membrane; regulation of plant-type hypersensitive response	GO:0003674	molecular function	GO:0005634 GO:0005773	nucleus; vacuole
Glyma.02G024800	Only JY93	up	AT1G10370	Glutathione S-transferase family protein		GO:0006749 GO:0006865 GO:0009407 GO:0009651 GO:0009704 GO:0015824 GO:0048527 GO:0060416 GO:0080148 GO:0080167	amino acid transport; de-etiolation; glutathione metabolic process; lateral root development; negative regulation of response to water deprivation; proline transport; response to growth hormone stimulus; response to karrikin; response to salt stress; toxin catabolic process	GO:0004364	glutathione transferase activity	GO:0005737 GO:0009507	chloroplast; cytoplasm
Glyma.02G026300	Only JY93	up	AT1G70000	myb-like transcription factor family protein	MYB_related	GO:0006355 GO:0009651 GO:0009723 GO:0009733 GO:0009737 GO:0009739 GO:0009751 GO:0009753 GO:0046686 GO:0080167	regulation of transcription, DNA-dependent; response to abscisic acid stimulus; response to auxin stimulus; response to cadmium ion; response to ethylene stimulus; response to gibberellin stimulus; response to jasmonic acid stimulus; response to karrikin; response to salicylic acid stimulus; response to salt stress	GO:0003676 GO:0003677 GO:0003700 GO:0008270	DNA binding; nucleic acid binding; sequence-specific DNA binding transcription factor activity; zinc ion binding	GO:0005634	nucleus
Glyma.02G028200	Only JY93	up	AT1G59970	Matrixin family protein		GO:0006508 GO:0008152	metabolic process; proteolysis	GO:0004222 GO:0008237 GO:0008270	metalloendopeptidase activity; metallopeptidase activity; zinc ion binding	GO:0005576 GO:0005886 GO:0031012 GO:0031225	anchored to membrane; extracellular matrix; extracellular region; plasma membrane
Glyma.02G030700	Only JY93	down	AT3G14470	NB-ARC domain-containing disease resistance protein		GO:0006952 GO:0009627 GO:0009697	defense response; salicylic acid biosynthetic process; systemic acquired resistance	GO:0005515 GO:0043531	ADP binding; protein binding	GO:0005576	extracellular region
Glyma.02G031600	Only K6	up	AT1G70230	TRICHOME BIREFRINGENCE-LIKE 27		GO:0010167 GO:0010411 GO:0015706	nitrate transport; response to nitrate; xyloglucan metabolic process	NA	NA	GO:0005634 GO:0005794	Golgi apparatus; nucleus
Glyma.02G031800	Only K6	up	AT1G70230	TRICHOME BIREFRINGENCE-LIKE 27		GO:0010167 GO:0010411 GO:0015706	nitrate transport; response to nitrate; xyloglucan metabolic process	NA	NA	GO:0005634 GO:0005794	Golgi apparatus; nucleus
Glyma.02G031900	Only K6	up	AT1G70230	TRICHOME BIREFRINGENCE-LIKE 27		GO:0010167 GO:0010411 GO:0015706	nitrate transport; response to nitrate; xyloglucan metabolic process	NA	NA	GO:0005634 GO:0005794	Golgi apparatus; nucleus
Glyma.02G033400	Only JY93	up	AT1G70280	NHL domain-containing protein		GO:0000394 GO:0008150 GO:0009086	RNA splicing, via endonucleolytic cleavage and ligation; biological process; methionine biosynthetic process	GO:0003674	molecular function	GO:0005576 GO:0005634	extracellular region; nucleus
Glyma.02G034200	Only K6	up	AT1G60190	ARM repeat superfamily protein		GO:0010029 GO:0016567	protein ubiquitination; regulation of seed germination	GO:0004842 GO:0008270	ubiquitin-protein ligase activity; zinc ion binding	GO:0000151 GO:0005634	nucleus; ubiquitin ligase complex
Glyma.02G034700	Only JY93	up	AT1G70370	polygalacturonase 2		GO:0000271 GO:0000272 GO:0005982 GO:0007389 GO:0008150 GO:0008361 GO:0009664 GO:0009825 GO:0009832 GO:0009926 GO:0009932 GO:0010015 GO:0010075 GO:0010817 GO:0040007 GO:0043481 GO:0048653 GO:0048767 GO:0071555	anther development; anthocyanin accumulation in tissues in response to UV light; auxin polar transport; biological process; cell tip growth; cell wall organization; growth; multidimensional cell growth; pattern specification process; plant-type cell wall biogenesis; plant-type cell wall organization; polysaccharide biosynthetic process; polysaccharide catabolic process; regulation of cell size; r…	GO:0004650	polygalacturonase activity	GO:0005576	extracellular region
Glyma.02G035200	Only K6	up	AT1G70420	Protein of unknown function (DUF1645)		GO:0080167	response to karrikin	GO:0003674	molecular function	GO:0005634	nucleus
Glyma.02G036900	Only K6	down	AT1G23380	KNOTTED1-like homeobox gene 6	TALE	GO:0006355 GO:0009062 GO:0009855 GO:0010014 GO:0010073 GO:0048513	determination of bilateral symmetry; fatty acid catabolic process; meristem initiation; meristem maintenance; organ development; regulation of transcription, DNA-dependent	GO:0003677 GO:0003700 GO:0043565	DNA binding; sequence-specific DNA binding; sequence-specific DNA binding transcription factor activity	GO:0005634	nucleus
Glyma.02G037900	Only K6	up	AT1G24095	Putative thiol-disulphide oxidoreductase DCC		NA	NA	NA	NA	GO:0005739	mitochondrion
Glyma.02G038800	Only K6	down	AT1G70610	transporter associated with antigen processing protein 1		GO:0000302 GO:0006810 GO:0010039 GO:0015996 GO:0055072 GO:0055085	chlorophyll catabolic process; iron ion homeostasis; response to iron ion; response to reactive oxygen species; transmembrane transport; transport	GO:0000166 GO:0005215 GO:0005524 GO:0016887 GO:0017111 GO:0042626	ATP binding; ATPase activity; ATPase activity, coupled to transmembrane movement of substances; nucleoside-triphosphatase activity; nucleotide binding; transporter activity	GO:0009507 GO:0009941 GO:0016021	chloroplast; chloroplast envelope; integral to membrane
Glyma.02G039700	Only K6	up	NA	NA		NA	NA	NA	NA	NA	NA
Glyma.02G039900	Only JY93	up	AT1G11170	Protein of unknown function (DUF707)		GO:0008150	biological process	GO:0016757	transferase activity, transferring glycosyl groups	GO:0005739	mitochondrion
Glyma.02G040700	Only K6	up	AT2G22500	uncoupling protein 5		GO:0006810 GO:0006839 GO:0010200 GO:0015992	mitochondrial transport; proton transport; response to chitin; transport	GO:0005310 GO:0017077	dicarboxylic acid transmembrane transporter activity; oxidative phosphorylation uncoupler activity	GO:0005739 GO:0005743 GO:0031966	mitochondrial inner membrane; mitochondrial membrane; mitochondrion
Glyma.02G042500	Only JY93	up	AT3G12500	basic chitinase		GO:0005975 GO:0009871 GO:0010167 GO:0015706 GO:0016998 GO:0046686 GO:0050832	carbohydrate metabolic process; cell wall macromolecule catabolic process; defense response to fungus; jasmonic acid and ethylene-dependent systemic resistance, ethylene mediated signaling pathway; nitrate transport; response to cadmium ion; response to nitrate	GO:0004568 GO:0008061	chitin binding; chitinase activity	GO:0005576 GO:0005773 GO:0005774 GO:0005829	cytosol; extracellular region; vacuolar membrane; vacuole
Glyma.02G043600	Only K6	up	NA	NA		NA	NA	NA	NA	NA	NA
Glyma.02G046800	Only JY93	up	AT5G66150	Glycosyl hydrolase family 38 protein		GO:0005975 GO:0006013	carbohydrate metabolic process; mannose metabolic process	GO:0003824 GO:0004553 GO:0004559 GO:0008270 GO:0015923 GO:0030246	alpha-mannosidase activity; carbohydrate binding; catalytic activity; hydrolase activity, hydrolyzing O-glycosyl compounds; mannosidase activity; zinc ion binding	GO:0005576	extracellular region
Glyma.02G051100	Only K6	down	AT5G66320	GATA transcription factor 5	GATA	GO:0006355 GO:0045893	positive regulation of transcription, DNA-dependent; regulation of transcription, DNA-dependent	GO:0003677 GO:0003700 GO:0008270 GO:0043565	DNA binding; sequence-specific DNA binding; sequence-specific DNA binding transcription factor activity; zinc ion binding	GO:0005634	nucleus
Glyma.02G051700	Only JY93	up	AT4G36360	beta-galactosidase 3		GO:0005975 GO:0005990 GO:0006598 GO:0009664 GO:0009698 GO:0009832 GO:0010075 GO:0019513 GO:0019515 GO:0042398	carbohydrate metabolic process; cellular modified amino acid biosynthetic process; lactose catabolic process; lactose catabolic process, using glucoside 3-dehydrogenase; lactose catabolic process via UDP-galactose; phenylpropanoid metabolic process; plant-type cell wall biogenesis; plant-type cell wall organization; polyamine catabolic process; regulation of meristem growth	GO:0003824 GO:0004553 GO:0004565 GO:0030246 GO:0043169	beta-galactosidase activity; carbohydrate binding; catalytic activity; cation binding; hydrolase activity, hydrolyzing O-glycosyl compounds	GO:0005576	extracellular region
Glyma.02G053900	Only K6	up	AT4G36470	S-adenosyl-L-methionine-dependent methyltransferases superfamily protein		NA	NA	GO:0008168 GO:0008757	S-adenosylmethionine-dependent methyltransferase activity; methyltransferase activity	GO:0005634	nucleus
Glyma.02G054900	Only K6	up	AT2G18210	NA		GO:0008150	biological process	GO:0003674	molecular function	GO:0005739	mitochondrion
Glyma.02G055000	Only K6	up	AT2G18210	NA		GO:0008150	biological process	GO:0003674	molecular function	GO:0005739	mitochondrion
Glyma.02G055100	Only K6	up	AT4G36520	Chaperone DnaJ-domain superfamily protein		NA	NA	GO:0031072	heat shock protein binding	NA	NA
Glyma.02G055500	Only K6	up	AT4G36550	ARM repeat superfamily protein		GO:0001666 GO:0009862 GO:0010310 GO:0016567 GO:0031347	protein ubiquitination; regulation of defense response; regulation of hydrogen peroxide metabolic process; response to hypoxia; systemic acquired resistance, salicylic acid mediated signaling pathway	GO:0004842 GO:0019894	kinesin binding; ubiquitin-protein ligase activity	GO:0000151 GO:0005871	kinesin complex; ubiquitin ligase complex
Glyma.02G057400	Only K6	down	AT5G66760	succinate dehydrogenase 1-1		GO:0006099 GO:0006121 GO:0022900 GO:0055114	electron transport chain; mitochondrial electron transport, succinate to ubiquinone; oxidation-reduction process; tricarboxylic acid cycle	GO:0000104 GO:0005524 GO:0009055 GO:0016491 GO:0016627 GO:0050660 GO:0050897	ATP binding; cobalt ion binding; electron carrier activity; flavin adenine dinucleotide binding; oxidoreductase activity; oxidoreductase activity, acting on the CH-CH group of donors; succinate dehydrogenase activity	GO:0005618 GO:0005739 GO:0005749	cell wall; mitochondrial respiratory chain complex II; mitochondrion
Glyma.02G058300	Only JY93	down	AT5G05610	alfin-like 1		GO:0006355	regulation of transcription, DNA-dependent	GO:0003677 GO:0008270 GO:0035064	DNA binding; methylated histone residue binding; zinc ion binding	GO:0005634	nucleus
Glyma.02G059100	Only K6	up	AT2G18630	Protein of unknown function (DUF677)		GO:0006499	N-terminal protein myristoylation	NA	NA	GO:0005634 GO:0005737 GO:0005777 GO:0005886	cytoplasm; nucleus; peroxisome; plasma membrane
Glyma.02G059200	Only JY93	up	AT2G23790	Protein of unknown function (DUF607)		GO:0008150	biological process	GO:0003674	molecular function	GO:0009507	chloroplast
Glyma.02G059600	Only K6	up	AT3G50770	calmodulin-like 41		GO:0008150 GO:0043090	amino acid import; biological process	GO:0005509	calcium ion binding	NA	NA
Glyma.02G060900	Only JY93	down	AT2G23690	NA		GO:0006499	N-terminal protein myristoylation	GO:0003674	molecular function	GO:0005575	cellular component
Glyma.02G063100	Only JY93	down	AT2G23620	methyl esterase 1		GO:0009627 GO:0009696 GO:0009817	defense response to fungus, incompatible interaction; salicylic acid metabolic process; systemic acquired resistance	GO:0016788 GO:0080030 GO:0080031 GO:0080032	hydrolase activity, acting on ester bonds; methyl indole-3-acetate esterase activity; methyl jasmonate esterase activity; methyl salicylate esterase activity	GO:0005737	cytoplasm
Glyma.02G065000	Only JY93	up	AT3G26950	NA		GO:0008150	biological process	GO:0003674	molecular function	GO:0005739	mitochondrion
Glyma.02G068900	Only JY93	up	AT5G13870	xyloglucan endotransglucosylase/hydrolase 5		GO:0005975 GO:0006073	carbohydrate metabolic process; cellular glucan metabolic process	GO:0004553 GO:0016762 GO:0016798	hydrolase activity, acting on glycosyl bonds; hydrolase activity, hydrolyzing O-glycosyl compounds; xyloglucan:xyloglucosyl transferase activity	GO:0005576 GO:0005618 GO:0048046	apoplast; cell wall; extracellular region
Glyma.02G069000	Only K6	up	AT3G02070	Cysteine proteinases superfamily protein		GO:0008150	biological process	GO:0008234	cysteine-type peptidase activity	GO:0005634	nucleus
Glyma.02G069200	Only JY93	down	AT1G65480	PEBP (phosphatidylethanolamine-binding protein) family protein		GO:0009909 GO:0009911 GO:0010119 GO:0048573	photoperiodism, flowering; positive regulation of flower development; regulation of flower development; regulation of stomatal movement	GO:0005515 GO:0008429	phosphatidylethanolamine binding; protein binding	GO:0005634 GO:0005737	cytoplasm; nucleus
Glyma.02G071700	Only K6	down	AT1G54385	ARM repeat superfamily protein		GO:0000245 GO:0000398	mRNA splicing, via spliceosome; spliceosomal complex assembly	NA	NA	GO:0005575	cellular component
Glyma.02G072300	Only K6	up	AT5G14602	NA		GO:0008150	biological process	GO:0003674	molecular function	NA	NA
Glyma.02G072500	Only JY93	down	AT5G18130	NA		GO:0008150 GO:0009617 GO:0045087	biological process; innate immune response; response to bacterium	GO:0003674	molecular function	GO:0005634	nucleus
Glyma.02G074000	Only JY93	down	AT2G39000	Acyl-CoA N-acyltransferases (NAT) superfamily protein		GO:0008152	metabolic process	GO:0008080	N-acetyltransferase activity	GO:0005634	nucleus
Glyma.02G074400	Only JY93	up	AT1G34380	5'-3' exonuclease family protein		NA	NA	GO:0003677 GO:0003824 GO:0008409	5'-3' exonuclease activity; DNA binding; catalytic activity	GO:0005634	nucleus
Glyma.02G076100	Only K6	up	AT1G71830	somatic embryogenesis receptor-like kinase 1		GO:0000226 GO:0000911 GO:0006468 GO:0007030 GO:0007062 GO:0009556 GO:0009742 GO:0009793 GO:0009880 GO:0010072 GO:0010152 GO:0010227 GO:0010228 GO:0010431 GO:0016310 GO:0042742 GO:0045595 GO:0046777 GO:0051301	Golgi organization; brassinosteroid mediated signaling pathway; cell division; cytokinesis by cell plate formation; defense response to bacterium; embryo development ending in seed dormancy; embryonic pattern specification; floral organ abscission; microsporogenesis; microtubule cytoskeleton organization; phosphorylation; pollen maturation; primary shoot apical meristem specification; protein aut…	GO:0004675 GO:0005515 GO:0016301 GO:0033612 GO:0042802	identical protein binding; kinase activity; protein binding; receptor serine/threonine kinase binding; transmembrane receptor protein serine/threonine kinase activity	GO:0005886 GO:0043234	plasma membrane; protein complex
Glyma.02G077500	Only K6	down	AT1G71760	NA		GO:0008150	biological process	GO:0003674	molecular function	GO:0005575	cellular component
Glyma.02G077700	Only K6	down	AT4G09730	RH39		GO:0006364 GO:0006399 GO:0009658 GO:0080158 GO:1901259	chloroplast organization; chloroplast rRNA processing; chloroplast ribulose bisphosphate carboxylase complex biogenesis; rRNA processing; tRNA metabolic process	GO:0003676 GO:0004386 GO:0005524 GO:0008026 GO:0016887 GO:0070180	ATP-dependent helicase activity; ATP binding; ATPase activity; LSU rRNA binding; helicase activity; nucleic acid binding	GO:0009507	chloroplast
Glyma.02G078600	Only JY93	up	AT4G09750	NAD(P)-binding Rossmann-fold superfamily protein		GO:0008152	metabolic process	GO:0000166 GO:0016491	nucleotide binding; oxidoreductase activity	GO:0005575	cellular component
Glyma.02G079300	Only JY93	down	AT1G22790	NA		GO:0000394 GO:0008150 GO:0009086	RNA splicing, via endonucleolytic cleavage and ligation; biological process; methionine biosynthetic process	GO:0003674	molecular function	GO:0005634 GO:0005886	nucleus; plasma membrane
Glyma.02G080200	Only K6	up	AT2G33710	Integrase-type DNA-binding superfamily protein	ERF	GO:0002679 GO:0006355 GO:0009723 GO:0010200 GO:0035556	intracellular signal transduction; regulation of transcription, DNA-dependent; respiratory burst involved in defense response; response to chitin; response to ethylene stimulus	GO:0003677 GO:0003700	DNA binding; sequence-specific DNA binding transcription factor activity	GO:0005634 GO:0005730	nucleolus; nucleus
Glyma.02G089100	Only K6	down	AT3G02600	lipid phosphate phosphatase 3		GO:0006644	phospholipid metabolic process	GO:0003824 GO:0008195	catalytic activity; phosphatidate phosphatase activity	GO:0005737 GO:0005886 GO:0005887 GO:0016020	cytoplasm; integral to plasma membrane; membrane; plasma membrane
Glyma.02G089500	Only K6	up	AT2G47485	NA		NA	NA	NA	NA	GO:0005739	mitochondrion
Glyma.02G093200	Only JY93	down	AT3G12580	heat shock protein 70		GO:0006457 GO:0009266 GO:0009408 GO:0009615 GO:0009617 GO:0009644 GO:0016567 GO:0034976 GO:0042542 GO:0046686	protein folding; protein ubiquitination; response to bacterium; response to cadmium ion; response to endoplasmic reticulum stress; response to heat; response to high light intensity; response to hydrogen peroxide; response to temperature stimulus; response to virus	GO:0005524 GO:0031625	ATP binding; ubiquitin protein ligase binding	GO:0005618 GO:0005739 GO:0005774 GO:0005794 GO:0005829 GO:0005886 GO:0048046	Golgi apparatus; apoplast; cell wall; cytosol; mitochondrion; plasma membrane; vacuolar membrane
Glyma.02G094700	Only K6	down	AT4G01470	tonoplast intrinsic protein 1;3		GO:0006810 GO:0006833 GO:0015840 GO:0055085	transmembrane transport; transport; urea transport; water transport	GO:0005215 GO:0015204 GO:0015250	transporter activity; urea transmembrane transporter activity; water channel activity	GO:0005737 GO:0016020 GO:0016021	cytoplasm; integral to membrane; membrane
Glyma.02G097700	Only JY93	up	AT1G25480	Aluminium activated malate transporter family protein		GO:0010044	response to aluminum ion	GO:0003674	molecular function	GO:0005634	nucleus
Glyma.02G097800	Only JY93	up	NA	NA		NA	NA	NA	NA	NA	NA
Glyma.02G097900	Only K6	down	AT1G68640	bZIP transcription factor family protein	bZIP	GO:0006355 GO:0009410 GO:0009909 GO:0030968 GO:0048451 GO:0048453	endoplasmic reticulum unfolded protein response; petal formation; regulation of flower development; regulation of transcription, DNA-dependent; response to xenobiotic stimulus; sepal formation	GO:0003677 GO:0003700 GO:0005515 GO:0043565 GO:0046983	DNA binding; protein binding; protein dimerization activity; sequence-specific DNA binding; sequence-specific DNA binding transcription factor activity	GO:0005634	nucleus
Glyma.02G098600	Only K6	up	AT1G13310	Endosomal targeting BRO1-like domain-containing protein		GO:0008150	biological process	GO:0003674	molecular function	GO:0005575	cellular component
Glyma.02G099500	Only K6	up	AT1G25560	AP2/B3 transcription factor family protein	RAV	GO:0006355 GO:0009873 GO:0030003 GO:0048573 GO:0070838	cellular cation homeostasis; divalent metal ion transport; ethylene mediated signaling pathway; photoperiodism, flowering; regulation of transcription, DNA-dependent	GO:0003677 GO:0003700	DNA binding; sequence-specific DNA binding transcription factor activity	GO:0005634	nucleus
Glyma.02G100000	Only JY93	up	AT1G68830	STT7 homolog STN7		GO:0006468 GO:0007623 GO:0015996 GO:0042548	chlorophyll catabolic process; circadian rhythm; protein phosphorylation; regulation of photosynthesis, light reaction	GO:0004672 GO:0004674 GO:0005524 GO:0016301 GO:0016772	ATP binding; kinase activity; protein kinase activity; protein serine/threonine kinase activity; transferase activity, transferring phosphorus-containing groups	GO:0009507	chloroplast
Glyma.02G100200	Only K6	up	AT1G25580	NAC (No Apical Meristem) domain transcriptional regulator superfamily protein	NAC	GO:0000077 GO:0006355 GO:0007275 GO:0010332 GO:0040020	DNA damage checkpoint; multicellular organismal development; regulation of meiosis; regulation of transcription, DNA-dependent; response to gamma radiation	GO:0003677 GO:0003700	DNA binding; sequence-specific DNA binding transcription factor activity	GO:0005634	nucleus
Glyma.02G100300	Only K6	up	AT5G38280	PR5-like receptor kinase		GO:0006468 GO:0009620 GO:0009691	cytokinin biosynthetic process; protein phosphorylation; response to fungus	GO:0004672 GO:0004674 GO:0004675 GO:0005524 GO:0016301 GO:0016772	ATP binding; kinase activity; protein kinase activity; protein serine/threonine kinase activity; transferase activity, transferring phosphorus-containing groups; transmembrane receptor protein serine/threonine kinase activity	GO:0005886 GO:0009506	plasma membrane; plasmodesma
Glyma.02G100400	Only K6	up	AT1G66920	Protein kinase superfamily protein		GO:0006468	protein phosphorylation	GO:0004672 GO:0004674 GO:0004713 GO:0005524 GO:0016301 GO:0016772	ATP binding; kinase activity; protein kinase activity; protein serine/threonine kinase activity; protein tyrosine kinase activity; transferase activity, transferring phosphorus-containing groups	GO:0005886	plasma membrane
Glyma.02G100800	Only K6	up	AT3G25700	Eukaryotic aspartyl protease family protein		GO:0006508	proteolysis	GO:0004190	aspartic-type endopeptidase activity	GO:0005576	extracellular region
Glyma.02G102600	Only K6	down	AT1G49730	Protein kinase superfamily protein		GO:0006468	protein phosphorylation	GO:0004672 GO:0004674 GO:0004713 GO:0005524 GO:0016301 GO:0016772	ATP binding; kinase activity; protein kinase activity; protein serine/threonine kinase activity; protein tyrosine kinase activity; transferase activity, transferring phosphorus-containing groups	GO:0005886	plasma membrane
Glyma.02G102800	Only JY93	down	AT1G49740	PLC-like phosphodiesterases superfamily protein		GO:0006629 GO:0035556	intracellular signal transduction; lipid metabolic process	GO:0004629 GO:0008081	phospholipase C activity; phosphoric diester hydrolase activity	GO:0005886 GO:0009506	plasma membrane; plasmodesma
Glyma.02G103500	Only JY93	up	AT4G34050	S-adenosyl-L-methionine-dependent methyltransferases superfamily protein		GO:0006598 GO:0009611 GO:0009698 GO:0009805 GO:0009963 GO:0019344 GO:0042398 GO:0046686	cellular modified amino acid biosynthetic process; coumarin biosynthetic process; cysteine biosynthetic process; phenylpropanoid metabolic process; polyamine catabolic process; positive regulation of flavonoid biosynthetic process; response to cadmium ion; response to wounding	GO:0008171 GO:0042409	O-methyltransferase activity; caffeoyl-CoA O-methyltransferase activity	GO:0005634 GO:0005829	cytosol; nucleus
Glyma.02G104600	Only K6	up	AT4G34131	UDP-glucosyl transferase 73B3		GO:0008152 GO:0051707	metabolic process; response to other organism	GO:0008194 GO:0016758 GO:0035251 GO:0080043	UDP-glucosyltransferase activity; UDP-glycosyltransferase activity; quercetin 3-O-glucosyltransferase activity; transferase activity, transferring hexosyl groups	NA	NA
Glyma.02G104900	Only K6	down	AT4G34131	UDP-glucosyl transferase 73B3		GO:0008152 GO:0051707	metabolic process; response to other organism	GO:0008194 GO:0016758 GO:0035251 GO:0080043	UDP-glucosyltransferase activity; UDP-glycosyltransferase activity; quercetin 3-O-glucosyltransferase activity; transferase activity, transferring hexosyl groups	NA	NA
Glyma.02G106100	Only K6	up	AT3G05290	peroxisomal adenine nucleotide carrier 1		GO:0006635 GO:0006810 GO:0006839 GO:0007031 GO:0009407 GO:0015866 GO:0015867 GO:0043161 GO:0051788 GO:0080024 GO:0080129 GO:0090351	ADP transport; ATP transport; fatty acid beta-oxidation; indolebutyric acid metabolic process; mitochondrial transport; peroxisome organization; proteasomal ubiquitin-dependent protein catabolic process; proteasome core complex assembly; response to misfolded protein; seedling development; toxin catabolic process; transport	GO:0005347 GO:0015217	ADP transmembrane transporter activity; ATP transmembrane transporter activity	GO:0005739 GO:0005743 GO:0005777	mitochondrial inner membrane; mitochondrion; peroxisome
Glyma.02G107300	Only K6	up	AT5G15210	homeobox protein 30	ZF-HD	NA	NA	GO:0003677 GO:0003700 GO:0005515	DNA binding; protein binding; sequence-specific DNA binding transcription factor activity	GO:0005634	nucleus
Glyma.02G108300	Only K6	down	AT1G26800	RING/U-box superfamily protein		NA	NA	GO:0008270	zinc ion binding	GO:0005634	nucleus
Glyma.02G108400	Only JY93	up	AT1G14190	Glucose-methanol-choline (GMC) oxidoreductase family protein		GO:0006066 GO:0055114	alcohol metabolic process; oxidation-reduction process	GO:0008812 GO:0016614 GO:0016832 GO:0050660	aldehyde-lyase activity; choline dehydrogenase activity; flavin adenine dinucleotide binding; oxidoreductase activity, acting on CH-OH group of donors	GO:0005634	nucleus
Glyma.02G108600	Only K6	down	AT5G39660	cycling DOF factor 2	Dof	GO:0006355	regulation of transcription, DNA-dependent	GO:0003677 GO:0003700 GO:0005515 GO:0008270	DNA binding; protein binding; sequence-specific DNA binding transcription factor activity; zinc ion binding	GO:0005634	nucleus
Glyma.02G109500	Only JY93	down	NA	NA		NA	NA	NA	NA	NA	NA
Glyma.02G111100	Only JY93	up	NA	NA		NA	NA	NA	NA	NA	NA
Glyma.02G112100	Only K6	up	AT1G13960	WRKY DNA-binding protein 4	WRKY	GO:0006355	regulation of transcription, DNA-dependent	GO:0003677 GO:0003700 GO:0043565	DNA binding; sequence-specific DNA binding; sequence-specific DNA binding transcription factor activity	GO:0005634	nucleus
Glyma.02G112400	Only K6	up	AT1G13950	eukaryotic elongation factor 5A-1		GO:0006413 GO:0006452 GO:0008612 GO:0010089 GO:0045901 GO:0045905	peptidyl-lysine modification to hypusine; positive regulation of translational elongation; positive regulation of translational termination; translational frameshifting; translational initiation; xylem development	GO:0003723 GO:0003743 GO:0003746 GO:0043022	RNA binding; ribosome binding; translation elongation factor activity; translation initiation factor activity	GO:0005737	cytoplasm
Glyma.02G116200	Only K6	up	AT1G13820	alpha/beta-Hydrolases superfamily protein		NA	NA	GO:0003824 GO:0016787	catalytic activity; hydrolase activity	GO:0005737	cytoplasm
Glyma.02G117600	Only JY93	down	AT1G68750	phosphoenolpyruvate carboxylase 4		GO:0006099 GO:0015977	carbon fixation; tricarboxylic acid cycle	GO:0003824 GO:0008964	catalytic activity; phosphoenolpyruvate carboxylase activity	GO:0005737	cytoplasm
Glyma.02G118500	Only JY93	up	AT1G13740	ABI five binding protein 2		GO:0009414 GO:0009737 GO:0009738 GO:0045893	abscisic acid mediated signaling pathway; positive regulation of transcription, DNA-dependent; response to abscisic acid stimulus; response to water deprivation	GO:0005515	protein binding	GO:0005634	nucleus
Glyma.02G119300	Only K6	up	NA	NA		NA	NA	NA	NA	NA	NA
Glyma.02G120600	Only JY93	down	AT1G31690	Copper amine oxidase family protein		GO:0009308 GO:0055114	amine metabolic process; oxidation-reduction process	GO:0005507 GO:0008131 GO:0048038	copper ion binding; primary amine oxidase activity; quinone binding	GO:0009507	chloroplast
Glyma.02G120800	Only K6	down	AT3G24240	Leucine-rich repeat receptor-like protein kinase family protein		GO:0000041 GO:0002237 GO:0006468 GO:0007165 GO:0007169 GO:0010103 GO:0010359 GO:0048443	protein phosphorylation; regulation of anion channel activity; response to molecule of bacterial origin; signal transduction; stamen development; stomatal complex morphogenesis; transition metal ion transport; transmembrane receptor protein tyrosine kinase signaling pathway	GO:0004672 GO:0004674 GO:0005524 GO:0016772	ATP binding; protein kinase activity; protein serine/threonine kinase activity; transferase activity, transferring phosphorus-containing groups	NA	NA
Glyma.02G121300	Only JY93	up	AT1G69170	Squamosa promoter-binding protein-like (SBP domain) transcription factor family protein	SBP	GO:0006355 GO:0010468 GO:0042742	defense response to bacterium; regulation of gene expression; regulation of transcription, DNA-dependent	GO:0003677 GO:0003700	DNA binding; sequence-specific DNA binding transcription factor activity	GO:0005634	nucleus
Glyma.02G121400	Only K6	down	AT1G69160	NA		GO:0008150	biological process	GO:0003674	molecular function	GO:0005739	mitochondrion
Glyma.02G121900	Only K6	up	AT3G51550	Malectin/receptor-like protein kinase family protein		GO:0000902 GO:0006007 GO:0006096 GO:0006468 GO:0006833 GO:0006972 GO:0007030 GO:0009266 GO:0009651 GO:0009791 GO:0010193 GO:0010483 GO:0016049 GO:0030244 GO:0046686 GO:0046777 GO:0048193 GO:0048767 GO:0050832	Golgi organization; Golgi vesicle transport; cell growth; cell morphogenesis; cellulose biosynthetic process; defense response to fungus; glucose catabolic process; glycolysis; hyperosmotic response; pollen tube reception; post-embryonic development; protein autophosphorylation; protein phosphorylation; response to cadmium ion; response to ozone; response to salt stress; response to temperature s…	GO:0004672 GO:0004674 GO:0005524 GO:0016301 GO:0016772	ATP binding; kinase activity; protein kinase activity; protein serine/threonine kinase activity; transferase activity, transferring phosphorus-containing groups	GO:0005576 GO:0005886 GO:0009506 GO:0016020 GO:0043680	extracellular region; filiform apparatus; membrane; plasma membrane; plasmodesma
Glyma.02G122000	Only K6	up	AT3G51550	Malectin/receptor-like protein kinase family protein		GO:0000902 GO:0006007 GO:0006096 GO:0006468 GO:0006833 GO:0006972 GO:0007030 GO:0009266 GO:0009651 GO:0009791 GO:0010193 GO:0010483 GO:0016049 GO:0030244 GO:0046686 GO:0046777 GO:0048193 GO:0048767 GO:0050832	Golgi organization; Golgi vesicle transport; cell growth; cell morphogenesis; cellulose biosynthetic process; defense response to fungus; glucose catabolic process; glycolysis; hyperosmotic response; pollen tube reception; post-embryonic development; protein autophosphorylation; protein phosphorylation; response to cadmium ion; response to ozone; response to salt stress; response to temperature s…	GO:0004672 GO:0004674 GO:0005524 GO:0016301 GO:0016772	ATP binding; kinase activity; protein kinase activity; protein serine/threonine kinase activity; transferase activity, transferring phosphorus-containing groups	GO:0005576 GO:0005886 GO:0009506 GO:0016020 GO:0043680	extracellular region; filiform apparatus; membrane; plasma membrane; plasmodesma
Glyma.02G122500	Only JY93	down	AT1G69040	ACT domain repeat 4		GO:0006521 GO:0008152 GO:0009735	metabolic process; regulation of cellular amino acid metabolic process; response to cytokinin stimulus	GO:0016597	amino acid binding	GO:0005829 GO:0009507	chloroplast; cytosol
Glyma.02G123000	Only JY93	up	AT5G22860	Serine carboxypeptidase S28 family protein		GO:0006508	proteolysis	GO:0008233 GO:0008236	peptidase activity; serine-type peptidase activity	GO:0005576 GO:0009507	chloroplast; extracellular region
Glyma.02G123200	Only JY93	up	AT5G15740	O-fucosyltransferase family protein		GO:0008150	biological process	GO:0016757	transferase activity, transferring glycosyl groups	GO:0005794	Golgi apparatus
Glyma.02G124700	Only JY93	up	AT1G17020	senescence-related gene 1		GO:0009737 GO:0009793 GO:0009813 GO:0009830 GO:0009845 GO:0010162 GO:0010260 GO:0055114	cell wall modification involved in abscission; embryo development ending in seed dormancy; flavonoid biosynthetic process; organ senescence; oxidation-reduction process; response to abscisic acid stimulus; seed dormancy process; seed germination	GO:0016491 GO:0016682 GO:0016706	oxidoreductase activity; oxidoreductase activity, acting on diphenols and related substances as donors, oxygen as acceptor; oxidoreductase activity, acting on paired donors, with incorporation or reduction of molecular oxygen, 2-oxoglutarate as one donor, and incorporation of one atom each of oxygen into both donors	GO:0005737	cytoplasm
Glyma.02G125600	Only K6	up	AT2G14960	Auxin-responsive GH3 family protein		GO:0009733 GO:0009741 GO:0010583	response to auxin stimulus; response to brassinosteroid stimulus; response to cyclopentenone	GO:0003674	molecular function	GO:0005737	cytoplasm
Glyma.02G125700	Only K6	up	NA	NA		NA	NA	NA	NA	NA	NA
Glyma.02G125800	Only K6	up	NA	NA		NA	NA	NA	NA	NA	NA
Glyma.02G125900	Only K6	up	NA	NA		NA	NA	NA	NA	NA	NA
Glyma.02G126800	Only JY93	up	AT1G13580	LAG1 longevity assurance homolog 3		GO:0006499 GO:0016126 GO:0042761 GO:0046520	N-terminal protein myristoylation; sphingoid biosynthetic process; sterol biosynthetic process; very long-chain fatty acid biosynthetic process	GO:0050291	sphingosine N-acyltransferase activity	GO:0005783 GO:0016021	endoplasmic reticulum; integral to membrane
Glyma.02G127300	Only JY93	up	AT1G68850	Peroxidase superfamily protein		GO:0006979 GO:0055114	oxidation-reduction process; response to oxidative stress	GO:0004601 GO:0020037	heme binding; peroxidase activity	GO:0005576	extracellular region
Glyma.02G127800	Only K6	down	AT3G25560	NSP-interacting kinase 2		GO:0006468	protein phosphorylation	GO:0004672 GO:0004674 GO:0004713 GO:0005524 GO:0016772	ATP binding; protein kinase activity; protein serine/threonine kinase activity; protein tyrosine kinase activity; transferase activity, transferring phosphorus-containing groups	NA	NA
Glyma.02G128800	Only K6	up	AT1G13480	Protein of unknown function (DUF1262)		GO:0008150	biological process	GO:0003674	molecular function	GO:0005575	cellular component
Glyma.02G131800	Only K6	up	AT5G42900	cold regulated gene 27		GO:0009409 GO:0080167	response to cold; response to karrikin	GO:0003674	molecular function	GO:0005634	nucleus
Glyma.02G132200	Only K6	down	AT3G19270	cytochrome P450, family 707, subfamily A, polypeptide 4		GO:0055114	oxidation-reduction process	GO:0005506 GO:0009055 GO:0010295 GO:0016705 GO:0019825 GO:0020037	(+)-abscisic acid 8'-hydroxylase activity; electron carrier activity; heme binding; iron ion binding; oxidoreductase activity, acting on paired donors, with incorporation or reduction of molecular oxygen; oxygen binding	GO:0005576	extracellular region
Glyma.02G134000	Only JY93	up	AT1G47480	alpha/beta-Hydrolases superfamily protein		GO:0008152 GO:0048765	metabolic process; root hair cell differentiation	GO:0016787	hydrolase activity	GO:0005634	nucleus
Glyma.02G134200	Only JY93	up	AT1G47480	alpha/beta-Hydrolases superfamily protein		GO:0008152 GO:0048765	metabolic process; root hair cell differentiation	GO:0016787	hydrolase activity	GO:0005634	nucleus
Glyma.02G135100	Only JY93	up	AT1G49570	Peroxidase superfamily protein		GO:0006979 GO:0055114	oxidation-reduction process; response to oxidative stress	GO:0004601 GO:0020037	heme binding; peroxidase activity	GO:0005576	extracellular region
Glyma.02G135800	Only K6	down	NA	NA		NA	NA	NA	NA	NA	NA
Glyma.02G136100	Only JY93	down	AT3G19000	2-oxoglutarate (2OG) and Fe(II)-dependent oxygenase superfamily protein		GO:0000023 GO:0019252 GO:0043085 GO:0055114	maltose metabolic process; oxidation-reduction process; positive regulation of catalytic activity; starch biosynthetic process	GO:0005506 GO:0016491 GO:0016706	iron ion binding; oxidoreductase activity; oxidoreductase activity, acting on paired donors, with incorporation or reduction of molecular oxygen, 2-oxoglutarate as one donor, and incorporation of one atom each of oxygen into both donors	GO:0005737	cytoplasm
Glyma.02G137300	Only JY93	up	AT5G62460	RING/FYVE/PHD zinc finger superfamily protein		NA	NA	GO:0008270	zinc ion binding	GO:0005737	cytoplasm
Glyma.02G140700	Only JY93	up	NA	NA		NA	NA	NA	NA	NA	NA
Glyma.02G143100	Only JY93	down	AT3G22970	Protein of unknown function (DUF506) _x0001_		GO:0008150	biological process	GO:0003674	molecular function	GO:0005634 GO:0009507	chloroplast; nucleus
Glyma.02G143400	Only K6	down	AT3G63430	NA		GO:0008150	biological process	GO:0003674	molecular function	GO:0005634	nucleus
Glyma.02G143900	Only K6	down	NA	NA		NA	NA	NA	NA	NA	NA
Glyma.02G145100	Only JY93	up	AT3G51895	sulfate transporter 3;1		GO:0008272	sulfate transport	GO:0015116	sulfate transmembrane transporter activity	GO:0009507	chloroplast
Glyma.02G146900	Only JY93	down	AT3G63180	TIC-like		NA	NA	NA	NA	GO:0005634	nucleus
Glyma.02G147200	Only K6	up	AT3G63130	RAN GTPase activating protein 1		GO:0000072 GO:0000280 GO:0000910 GO:0000911 GO:0006346 GO:0006406 GO:0006606 GO:0006913 GO:0007000 GO:0009407 GO:0031048 GO:0048527 GO:0051567	M phase specific microtubule process; chromatin silencing by small RNA; cytokinesis; cytokinesis by cell plate formation; histone H3-K9 methylation; lateral root development; mRNA export from nucleus; methylation-dependent chromatin silencing; nuclear division; nucleocytoplasmic transport; nucleolus organization; protein import into nucleus; toxin catabolic process	GO:0005098 GO:0005515	RAN GTPase activator activity; protein binding	GO:0005634 GO:0005635 GO:0005886 GO:0009504 GO:0009507 GO:0032153	cell division site; cell plate; chloroplast; nuclear envelope; nucleus; plasma membrane
Glyma.02G148200	Only K6	up	AT1G03220	Eukaryotic aspartyl protease family protein		GO:0006508 GO:0009651	proteolysis; response to salt stress	GO:0004190	aspartic-type endopeptidase activity	GO:0005576 GO:0005618 GO:0005794 GO:0005886 GO:0009505 GO:0009506 GO:0016020	Golgi apparatus; cell wall; extracellular region; membrane; plant-type cell wall; plasma membrane; plasmodesma
Glyma.02G149100	Only K6	up	AT2G48150	glutathione peroxidase 4		GO:0006499 GO:0006979 GO:0009407 GO:0009688 GO:0009827 GO:0009860 GO:0055114	N-terminal protein myristoylation; abscisic acid biosynthetic process; oxidation-reduction process; plant-type cell wall modification; pollen tube growth; response to oxidative stress; toxin catabolic process	GO:0004602	glutathione peroxidase activity	GO:0005739 GO:0005829	cytosol; mitochondrion
Glyma.02G149600	Only K6	up	AT3G06190	BTB-POZ and MATH domain 2		GO:0000956 GO:0006970 GO:0042631 GO:0071472	cellular response to salt stress; cellular response to water deprivation; nuclear-transcribed mRNA catabolic process; response to osmotic stress	GO:0005515	protein binding	GO:0005634	nucleus
Glyma.02G150600	Only K6	up	AT2G48010	receptor-like kinase in in flowers 3		GO:0006468	protein phosphorylation	GO:0004672 GO:0004674 GO:0004702 GO:0005524 GO:0016301 GO:0016772	ATP binding; kinase activity; protein kinase activity; protein serine/threonine kinase activity; receptor signaling protein serine/threonine kinase activity; transferase activity, transferring phosphorus-containing groups	GO:0005576 GO:0005886	extracellular region; plasma membrane
Glyma.02G152000	Only JY93	up	AT4G03110	RNA-binding protein-defense related 1		GO:0000398 GO:0009626 GO:0080151	mRNA splicing, via spliceosome; plant-type hypersensitive response; positive regulation of salicylic acid mediated signaling pathway	GO:0000166 GO:0003676 GO:0003723	RNA binding; nucleic acid binding; nucleotide binding	GO:0005737	cytoplasm
Glyma.02G153800	Only JY93	up	AT2G47830	Cation efflux family protein		GO:0006812 GO:0055085	cation transport; transmembrane transport	GO:0008324 GO:0015562	cation transmembrane transporter activity; efflux transmembrane transporter activity	GO:0016020 GO:0016021	integral to membrane; membrane
Glyma.02G157700	Only JY93	up	AT3G57060	binding		GO:0000910 GO:0007017 GO:0007067 GO:0009957 GO:0030261	chromosome condensation; cytokinesis; epidermal cell fate specification; microtubule-based process; mitosis	NA	NA	GO:0000796 GO:0005634	condensin complex; nucleus
Glyma.02G157900	Only JY93	up	AT4G39235	NA		GO:0008150	biological process	GO:0003674	molecular function	GO:0005634	nucleus
Glyma.02G158700	Only JY93	down	AT5G42800	dihydroflavonol 4-reductase		GO:0009718 GO:0009744 GO:0010224 GO:0044237	anthocyanin-containing compound biosynthetic process; cellular metabolic process; response to UV-B; response to sucrose stimulus	GO:0000166 GO:0003824 GO:0045552 GO:0050662	catalytic activity; coenzyme binding; dihydrokaempferol 4-reductase activity; nucleotide binding	GO:0042406	extrinsic to endoplasmic reticulum membrane
Glyma.02G160000	Only JY93	up	AT2G01050	zinc ion binding;nucleic acid binding		GO:0008150	biological process	GO:0003676 GO:0008270	nucleic acid binding; zinc ion binding	GO:0005634	nucleus
Glyma.02G161100	Only K6	up	AT1G42990	basic region/leucine zipper motif 60	bZIP	GO:0000165 GO:0002679 GO:0006355 GO:0006612 GO:0006984 GO:0007154 GO:0009409 GO:0009410 GO:0009693 GO:0009738 GO:0009862 GO:0009867 GO:0009873 GO:0010200 GO:0010286 GO:0010363 GO:0030968 GO:0031348 GO:0034976 GO:0035556 GO:0043069 GO:0050832	ER-nucleus signaling pathway; MAPK cascade; abscisic acid mediated signaling pathway; cell communication; defense response to fungus; endoplasmic reticulum unfolded protein response; ethylene biosynthetic process; ethylene mediated signaling pathway; heat acclimation; intracellular signal transduction; jasmonic acid mediated signaling pathway; negative regulation of defense response; negative reg…	GO:0003677 GO:0003700 GO:0043565 GO:0046983	DNA binding; protein dimerization activity; sequence-specific DNA binding; sequence-specific DNA binding transcription factor activity	GO:0005634 GO:0005789	endoplasmic reticulum membrane; nucleus
Glyma.02G161200	Only K6	up	AT5G04260	WCRKC thioredoxin 2		GO:0006662 GO:0045454	cell redox homeostasis; glycerol ether metabolic process	GO:0009055 GO:0015035	electron carrier activity; protein disulfide oxidoreductase activity	GO:0009507 GO:0009570	chloroplast; chloroplast stroma
Glyma.02G162800	Only JY93	up	NA	NA		NA	NA	NA	NA	NA	NA
Glyma.02G163200	Only K6	down	AT1G53390	P-loop containing nucleoside triphosphate hydrolases superfamily protein		NA	NA	GO:0000166 GO:0005524 GO:0016887 GO:0017111 GO:0042626	ATP binding; ATPase activity; ATPase activity, coupled to transmembrane movement of substances; nucleoside-triphosphatase activity; nucleotide binding	GO:0005886	plasma membrane
Glyma.02G165300	Only JY93	down	AT3G52990	Pyruvate kinase family protein		GO:0006096 GO:0046686	glycolysis; response to cadmium ion	GO:0000287 GO:0003824 GO:0004743 GO:0030955	catalytic activity; magnesium ion binding; potassium ion binding; pyruvate kinase activity	GO:0005737 GO:0005829 GO:0016020	cytoplasm; cytosol; membrane
Glyma.02G170400	Only K6	up	NA	NA		NA	NA	NA	NA	NA	NA
Glyma.02G172900	Only K6	down	AT5G06750	Protein phosphatase 2C family protein		GO:0006470	protein dephosphorylation	GO:0003824 GO:0004722	catalytic activity; protein serine/threonine phosphatase activity	GO:0005739 GO:0008287	mitochondrion; protein serine/threonine phosphatase complex
Glyma.02G174800	Only K6	up	AT3G57800	basic helix-loop-helix (bHLH) DNA-binding superfamily protein	bHLH	GO:0006355	regulation of transcription, DNA-dependent	GO:0003677 GO:0003700	DNA binding; sequence-specific DNA binding transcription factor activity	GO:0005634	nucleus
Glyma.02G177800	Only JY93	down	AT5G06800	myb-like HTH transcriptional regulator family protein	G2-like	GO:0006355	regulation of transcription, DNA-dependent	GO:0003700	sequence-specific DNA binding transcription factor activity	GO:0005634	nucleus
Glyma.02G179100	Only JY93	down	AT2G41190	Transmembrane amino acid transporter family protein		GO:0006865	amino acid transport	GO:0015171	amino acid transmembrane transporter activity	GO:0005774 GO:0005886 GO:0016020	membrane; plasma membrane; vacuolar membrane
Glyma.02G183300	Only JY93	up	AT1G56145	Leucine-rich repeat transmembrane protein kinase		GO:0000041 GO:0006468	protein phosphorylation; transition metal ion transport	GO:0004672 GO:0004674 GO:0004713 GO:0005524 GO:0016772	ATP binding; protein kinase activity; protein serine/threonine kinase activity; protein tyrosine kinase activity; transferase activity, transferring phosphorus-containing groups	GO:0005886 GO:0009506	plasma membrane; plasmodesma
Glyma.02G184300	Only K6	up	AT3G14470	NB-ARC domain-containing disease resistance protein		GO:0006952 GO:0009627 GO:0009697	defense response; salicylic acid biosynthetic process; systemic acquired resistance	GO:0005515 GO:0043531	ADP binding; protein binding	GO:0005576	extracellular region
Glyma.02G189300	Only K6	down	AT5G46180	ornithine-delta-aminotransferase		GO:0006561 GO:0006593 GO:0006635 GO:0007031 GO:0009626 GO:0009651 GO:0009816 GO:0010260 GO:0019544 GO:0042538	arginine catabolic process to glutamate; defense response to bacterium, incompatible interaction; fatty acid beta-oxidation; hyperosmotic salinity response; organ senescence; ornithine catabolic process; peroxisome organization; plant-type hypersensitive response; proline biosynthetic process; response to salt stress	GO:0004587 GO:0008270	ornithine-oxo-acid transaminase activity; zinc ion binding	GO:0005737 GO:0005739	cytoplasm; mitochondrion
Glyma.02G195400	Only K6	up	AT3G11820	syntaxin of plants 121		GO:0000165 GO:0002679 GO:0006355 GO:0006612 GO:0006820 GO:0006862 GO:0006886 GO:0006888 GO:0006944 GO:0006952 GO:0007154 GO:0007165 GO:0009409 GO:0009414 GO:0009595 GO:0009611 GO:0009617 GO:0009620 GO:0009625 GO:0009697 GO:0009723 GO:0009733 GO:0009737 GO:0009738 GO:0009753 GO:0009862 GO:0009863 GO:0009867 GO:0009963 GO:0010119 GO:0010148 GO:0010200 GO:0010310 GO:0010363 GO:0015696 GO:0015802 GO:…	ER to Golgi vesicle-mediated transport; MAPK cascade; abscisic acid mediated signaling pathway; amino acid import; ammonium transport; anion transport; basic amino acid transport; cell communication; cellular membrane fusion; defense response; defense response to bacterium; defense response to fungus; detection of biotic stimulus; endoplasmic reticulum unfolded protein response; hyperosmotic sali…	GO:0005484 GO:0005515 GO:0043495	SNAP receptor activity; protein anchor; protein binding	GO:0005802 GO:0005886 GO:0009504 GO:0009506 GO:0031201	SNARE complex; cell plate; plasma membrane; plasmodesma; trans-Golgi network
Glyma.02G197000	Only JY93	down	AT2G01820	Leucine-rich repeat protein kinase family protein		GO:0006468 GO:0009555 GO:0009616 GO:0010050	pollen development; protein phosphorylation; vegetative phase change; virus induced gene silencing	GO:0004672 GO:0004674 GO:0005524 GO:0016772	ATP binding; protein kinase activity; protein serine/threonine kinase activity; transferase activity, transferring phosphorus-containing groups	GO:0005576 GO:0005886 GO:0009505 GO:0009506	extracellular region; plant-type cell wall; plasma membrane; plasmodesma
Glyma.02G197800	Only K6	up	AT3G11650	NDR1/HIN1-like 2		GO:0051607	defense response to virus	GO:0003674	molecular function	GO:0009506 GO:0009507	chloroplast; plasmodesma
Glyma.02G198900	Only K6	up	AT3G52520	NA		GO:0008150	biological process	GO:0003674	molecular function	GO:0005739	mitochondrion
Glyma.02G202500	Only JY93	up	AT2G24270	aldehyde dehydrogenase 11A3		GO:0008152 GO:0009902 GO:0019344 GO:0055114	chloroplast relocation; cysteine biosynthetic process; metabolic process; oxidation-reduction process	GO:0004028 GO:0008886 GO:0016491	3-chloroallyl aldehyde dehydrogenase activity; glyceraldehyde-3-phosphate dehydrogenase (NADP+) (non-phosphorylating) activity; oxidoreductase activity	GO:0005737	cytoplasm
Glyma.02G203300	Only JY93	up	AT4G30950	fatty acid desaturase 6		GO:0000096 GO:0006546 GO:0006629 GO:0006633 GO:0006636 GO:0006655 GO:0006733 GO:0006766 GO:0008652 GO:0009072 GO:0009106 GO:0009108 GO:0009117 GO:0009416 GO:0009695 GO:0010205 GO:0015994 GO:0015995 GO:0016117 GO:0019216 GO:0019288 GO:0019684 GO:0019748 GO:0031408 GO:0035304 GO:0044272	aromatic amino acid family metabolic process; carotenoid biosynthetic process; cellular amino acid biosynthetic process; chlorophyll biosynthetic process; chlorophyll metabolic process; coenzyme biosynthetic process; fatty acid biosynthetic process; glycine catabolic process; isopentenyl diphosphate biosynthetic process, mevalonate-independent pathway; jasmonic acid biosynthetic process; lipid me…	GO:0045485	omega-6 fatty acid desaturase activity	GO:0009507 GO:0009941	chloroplast; chloroplast envelope
Glyma.02G205000	Only K6	up	AT2G24030	zinc ion binding;nucleic acid binding		GO:0008150	biological process	GO:0003676 GO:0008270	nucleic acid binding; zinc ion binding	GO:0005622 GO:0005634	intracellular; nucleus
Glyma.02G205100	Only JY93	down	AT4G30660	Low temperature and salt responsive protein family		GO:0006333 GO:0009409 GO:0042538 GO:0042631	cellular response to water deprivation; chromatin assembly or disassembly; hyperosmotic salinity response; response to cold	NA	NA	GO:0016021	integral to membrane
Glyma.02G207400	Only K6	down	AT2G23950	Leucine-rich repeat protein kinase family protein		GO:0006468 GO:0010075	protein phosphorylation; regulation of meristem growth	GO:0004672 GO:0004674 GO:0005524 GO:0016301 GO:0016772	ATP binding; kinase activity; protein kinase activity; protein serine/threonine kinase activity; transferase activity, transferring phosphorus-containing groups	GO:0005886	plasma membrane
Glyma.02G208400	Only JY93	up	AT1G22410	Class-II DAHP synthetase family protein		GO:0009073 GO:0009611 GO:0009627 GO:0009805 GO:0034976	aromatic amino acid family biosynthetic process; coumarin biosynthetic process; response to endoplasmic reticulum stress; response to wounding; systemic acquired resistance	GO:0003849	3-deoxy-7-phosphoheptulonate synthase activity	GO:0009507 GO:0009536 GO:0016020	chloroplast; membrane; plastid
Glyma.02G208800	Only K6	up	AT1G78310	VQ motif-containing protein		NA	NA	NA	NA	GO:0005634	nucleus
Glyma.02G210700	Only K6	up	AT1G72200	RING/U-box superfamily protein		GO:0006826 GO:0010106 GO:0010167 GO:0010413 GO:0015706 GO:0045492	cellular response to iron ion starvation; glucuronoxylan metabolic process; iron ion transport; nitrate transport; response to nitrate; xylan biosynthetic process	GO:0008270	zinc ion binding	NA	NA
Glyma.02G210800	Only K6	up	AT4G10500	2-oxoglutarate (2OG) and Fe(II)-dependent oxygenase superfamily protein		GO:0009627 GO:0009697 GO:0019748 GO:0055114	oxidation-reduction process; salicylic acid biosynthetic process; secondary metabolic process; systemic acquired resistance	GO:0016491 GO:0016706	oxidoreductase activity; oxidoreductase activity, acting on paired donors, with incorporation or reduction of molecular oxygen, 2-oxoglutarate as one donor, and incorporation of one atom each of oxygen into both donors	NA	NA
Glyma.02G212400	Only JY93	down	AT2G22490	Cyclin D2;1		GO:0000278 GO:0009744 GO:0010440 GO:0042023 GO:0045736 GO:0051726	DNA endoreduplication; mitotic cell cycle; negative regulation of cyclin-dependent protein serine/threonine kinase activity; regulation of cell cycle; response to sucrose stimulus; stomatal lineage progression	GO:0005515 GO:0016538	cyclin-dependent protein serine/threonine kinase regulator activity; protein binding	GO:0005634	nucleus
Glyma.02G213800	Only K6	down	AT3G25710	basic helix-loop-helix 32	bHLH	GO:0006355 GO:0009718 GO:0016036 GO:0048364 GO:0080147	anthocyanin-containing compound biosynthetic process; cellular response to phosphate starvation; regulation of transcription, DNA-dependent; root development; root hair cell development	GO:0003677 GO:0003700 GO:0005515	DNA binding; protein binding; sequence-specific DNA binding transcription factor activity	GO:0005634	nucleus
Glyma.02G215700	Only JY93	up	AT1G70170	matrix metalloproteinase		GO:0006508 GO:0008152	metabolic process; proteolysis	GO:0004222 GO:0008237 GO:0008270	metalloendopeptidase activity; metallopeptidase activity; zinc ion binding	GO:0005576 GO:0031012 GO:0031225	anchored to membrane; extracellular matrix; extracellular region
Glyma.02G215900	Only K6	up	AT1G74520	HVA22 homologue A		GO:0009269 GO:0009409 GO:0009414 GO:0009651 GO:0009737 GO:0042538 GO:0042742	defense response to bacterium; hyperosmotic salinity response; response to abscisic acid stimulus; response to cold; response to desiccation; response to salt stress; response to water deprivation	GO:0003674	molecular function	GO:0005634	nucleus
Glyma.02G217400	Only K6	up	AT4G37900	Protein of unknown function (duplicated DUF1399)		GO:0006865 GO:0008150	amino acid transport; biological process	NA	NA	GO:0005737	cytoplasm
Glyma.02G217600	Only JY93	up	AT5G64460	Phosphoglycerate mutase family protein		GO:0008150 GO:0009736	biological process; cytokinin mediated signaling pathway	GO:0003674	molecular function	GO:0005829	cytosol
Glyma.02G217800	Only JY93	up	AT5G65640	beta HLH protein 93	bHLH	NA	NA	GO:0003677 GO:0003700	DNA binding; sequence-specific DNA binding transcription factor activity	GO:0005634	nucleus
Glyma.02G218300	Only JY93	up	AT1G58290	Glutamyl-tRNA reductase family protein		GO:0000302 GO:0006779 GO:0006783 GO:0009416 GO:0010039 GO:0015995 GO:0033014 GO:0055072 GO:0055114	chlorophyll biosynthetic process; heme biosynthetic process; iron ion homeostasis; oxidation-reduction process; porphyrin-containing compound biosynthetic process; response to iron ion; response to light stimulus; response to reactive oxygen species; tetrapyrrole biosynthetic process	GO:0000166 GO:0005515 GO:0008883 GO:0050661	NADP binding; glutamyl-tRNA reductase activity; nucleotide binding; protein binding	GO:0009507	chloroplast
Glyma.02G219100	Only K6	up	AT5G05220	NA		GO:0008150	biological process	GO:0003674	molecular function	GO:0009507	chloroplast
Glyma.02G220300	Only K6	down	AT4G01200	Calcium-dependent lipid-binding (CaLB domain) family protein		GO:0008150	biological process	GO:0003674	molecular function	GO:0005575	cellular component
Glyma.02G220900	Only K6	up	AT5G24620	Pathogenesis-related thaumatin superfamily protein		GO:0051707	response to other organism	NA	NA	GO:0005576	extracellular region
Glyma.02G221900	Only K6	down	AT5G55830	Concanavalin A-like lectin protein kinase family protein		GO:0000226 GO:0000911 GO:0006468	cytokinesis by cell plate formation; microtubule cytoskeleton organization; protein phosphorylation	GO:0004672 GO:0004674 GO:0005524 GO:0016301 GO:0016772	ATP binding; kinase activity; protein kinase activity; protein serine/threonine kinase activity; transferase activity, transferring phosphorus-containing groups	GO:0005886	plasma membrane
Glyma.02G223700	Only K6	up	AT3G07650	CONSTANS-like 9	CO-like	GO:0006355 GO:0007623 GO:0048579	circadian rhythm; negative regulation of long-day photoperiodism, flowering; regulation of transcription, DNA-dependent	GO:0003700 GO:0008270	sequence-specific DNA binding transcription factor activity; zinc ion binding	GO:0005622 GO:0005634	intracellular; nucleus
Glyma.02G224000	Only K6	up	AT5G58940	calmodulin-binding receptor-like cytoplasmic kinase 1		GO:0009409 GO:0009627 GO:0009651 GO:0009697 GO:0009737 GO:0042542	response to abscisic acid stimulus; response to cold; response to hydrogen peroxide; response to salt stress; salicylic acid biosynthetic process; systemic acquired resistance	GO:0004674 GO:0004683 GO:0005516 GO:0016301	calmodulin-dependent protein kinase activity; calmodulin binding; kinase activity; protein serine/threonine kinase activity	GO:0005886	plasma membrane
Glyma.02G226300	Only JY93	up	AT5G58760	damaged DNA binding 2		GO:0006281 GO:0010224	DNA repair; response to UV-B	GO:0000166 GO:0003676 GO:0008270	nucleic acid binding; nucleotide binding; zinc ion binding	GO:0005634 GO:0080008	CUL4-RING ubiquitin ligase complex; nucleus
Glyma.02G227000	Only K6	up	AT5G58620	zinc finger (CCCH-type) family protein	C3H	GO:0006355 GO:0006888 GO:0043090	ER to Golgi vesicle-mediated transport; amino acid import; regulation of transcription, DNA-dependent	GO:0003676 GO:0003700 GO:0008270	nucleic acid binding; sequence-specific DNA binding transcription factor activity; zinc ion binding	GO:0005634	nucleus
Glyma.02G227200	Only JY93	up	AT5G05580	fatty acid desaturase 8		GO:0006629 GO:0006633 GO:0009266 GO:0055114	fatty acid biosynthetic process; lipid metabolic process; oxidation-reduction process; response to temperature stimulus	GO:0016717 GO:0042389	omega-3 fatty acid desaturase activity; oxidoreductase activity, acting on paired donors, with oxidation of a pair of donors resulting in the reduction of molecular oxygen to two molecules of water	GO:0009507 GO:0009941	chloroplast; chloroplast envelope
Glyma.02G227700	Only JY93	up	AT1G07180	alternative NAD(P)H dehydrogenase 1		GO:0010264 GO:0071482	cellular response to light stimulus; myo-inositol hexakisphosphate biosynthetic process	GO:0003954 GO:0016491 GO:0050660	NADH dehydrogenase activity; flavin adenine dinucleotide binding; oxidoreductase activity	GO:0005739 GO:0005777 GO:0031304	intrinsic to mitochondrial inner membrane; mitochondrion; peroxisome
Glyma.02G228100	Only K6	down	AT3G47340	glutamine-dependent asparagine synthase 1		GO:0006529 GO:0009063 GO:0009416 GO:0009646 GO:0009744 GO:0009749 GO:0009750 GO:0043617	asparagine biosynthetic process; cellular amino acid catabolic process; cellular response to sucrose starvation; response to absence of light; response to fructose stimulus; response to glucose stimulus; response to light stimulus; response to sucrose stimulus	GO:0004066	asparagine synthase (glutamine-hydrolyzing) activity	GO:0005737	cytoplasm
Glyma.02G228200	Only K6	up	AT2G30020	Protein phosphatase 2C family protein		GO:0006470 GO:0009611 GO:0009620 GO:0009738 GO:0050832	abscisic acid mediated signaling pathway; defense response to fungus; protein dephosphorylation; response to fungus; response to wounding	GO:0003824 GO:0004722	catalytic activity; protein serine/threonine phosphatase activity	GO:0008287 GO:0009536	plastid; protein serine/threonine phosphatase complex
Glyma.02G228300	Only K6	up	AT2G30040	mitogen-activated protein kinase kinase kinase 14		GO:0006468 GO:0009658 GO:0009737 GO:0009738 GO:0009753 GO:0009873 GO:0010200 GO:0035556 GO:0045893 GO:0046777	abscisic acid mediated signaling pathway; chloroplast organization; ethylene mediated signaling pathway; intracellular signal transduction; positive regulation of transcription, DNA-dependent; protein autophosphorylation; protein phosphorylation; response to abscisic acid stimulus; response to chitin; response to jasmonic acid stimulus	GO:0004672 GO:0004674 GO:0005524 GO:0016301 GO:0016772	ATP binding; kinase activity; protein kinase activity; protein serine/threonine kinase activity; transferase activity, transferring phosphorus-containing groups	GO:0005634	nucleus
Glyma.02G228800	Only K6	down	AT3G16720	TOXICOS EN LEVADURA 2		GO:0000165 GO:0002679 GO:0006612 GO:0006952 GO:0009595 GO:0009611 GO:0009612 GO:0009697 GO:0009814 GO:0009862 GO:0009867 GO:0010200 GO:0010310 GO:0010363 GO:0031348 GO:0035556 GO:0042742 GO:0043900 GO:0050832	MAPK cascade; defense response; defense response, incompatible interaction; defense response to bacterium; defense response to fungus; detection of biotic stimulus; intracellular signal transduction; jasmonic acid mediated signaling pathway; negative regulation of defense response; protein targeting to membrane; regulation of hydrogen peroxide metabolic process; regulation of multi-organism proce…	GO:0008270	zinc ion binding	GO:0005634	nucleus
Glyma.02G230800	Only K6	up	AT1G07050	CCT motif family protein		GO:0007623 GO:0008150	biological process; circadian rhythm	GO:0003674	molecular function	GO:0005634	nucleus
Glyma.02G231600	Only JY93	up	AT2G30210	laccase 3		GO:0046274 GO:0055114	lignin catabolic process; oxidation-reduction process	GO:0005507 GO:0016491 GO:0052716	copper ion binding; hydroquinone:oxygen oxidoreductase activity; oxidoreductase activity	GO:0005576 GO:0048046	apoplast; extracellular region
Glyma.02G232100	Only K6	up	AT5G58430	exocyst subunit exo70 family protein B1		GO:0006887 GO:0006904 GO:0009738 GO:0035556	abscisic acid mediated signaling pathway; exocytosis; intracellular signal transduction; vesicle docking involved in exocytosis	NA	NA	GO:0000145 GO:0005623 GO:0005737 GO:0005829 GO:0005886 GO:0070062	cell; cytoplasm; cytosol; exocyst; extracellular vesicular exosome; plasma membrane
Glyma.02G232600	Only K6	up	AT2G38470	WRKY DNA-binding protein 33	WRKY	GO:0000165 GO:0002679 GO:0006355 GO:0006612 GO:0006944 GO:0006970 GO:0009408 GO:0009409 GO:0009414 GO:0009595 GO:0009651 GO:0009697 GO:0009862 GO:0009863 GO:0009867 GO:0010120 GO:0010200 GO:0010310 GO:0010363 GO:0010508 GO:0031348 GO:0034605 GO:0035556 GO:0042742 GO:0043069 GO:0043900 GO:0050832 GO:0070370	MAPK cascade; camalexin biosynthetic process; cellular heat acclimation; cellular membrane fusion; cellular response to heat; defense response to bacterium; defense response to fungus; detection of biotic stimulus; intracellular signal transduction; jasmonic acid mediated signaling pathway; negative regulation of defense response; negative regulation of programmed cell death; positive regulation …	GO:0003700 GO:0005515	protein binding; sequence-specific DNA binding transcription factor activity	GO:0005634	nucleus
Glyma.02G233300	Only K6	up	AT2G40435	NA		NA	NA	NA	NA	GO:0005634	nucleus
Glyma.02G234800	Only K6	down	AT5G58380	SOS3-interacting protein 1		GO:0006468 GO:0007165	protein phosphorylation; signal transduction	GO:0004672 GO:0004674 GO:0005524 GO:0016301 GO:0016772	ATP binding; kinase activity; protein kinase activity; protein serine/threonine kinase activity; transferase activity, transferring phosphorus-containing groups	GO:0005886	plasma membrane
Glyma.02G236000	Only JY93	up	NA	NA		NA	NA	NA	NA	NA	NA
Glyma.02G236500	Only JY93	up	AT2G30490	cinnamate-4-hydroxylase		GO:0009416 GO:0009555 GO:0009611 GO:0009698 GO:0009699 GO:0009805 GO:0009808 GO:0009963 GO:0032502 GO:0040007 GO:0055114 GO:0080167	coumarin biosynthetic process; developmental process; growth; lignin metabolic process; oxidation-reduction process; phenylpropanoid biosynthetic process; phenylpropanoid metabolic process; pollen development; positive regulation of flavonoid biosynthetic process; response to karrikin; response to light stimulus; response to wounding	GO:0005515 GO:0016710 GO:0042802	identical protein binding; protein binding; trans-cinnamate 4-monooxygenase activity	GO:0005576 GO:0005774 GO:0005783 GO:0005794 GO:0005886 GO:0009505 GO:0009506 GO:0016020	Golgi apparatus; endoplasmic reticulum; extracellular region; membrane; plant-type cell wall; plasma membrane; plasmodesma; vacuolar membrane
Glyma.02G236800	Only K6	up	AT4G27950	cytokinin response factor 4	ERF	GO:0006355 GO:0042991 GO:0048366	leaf development; regulation of transcription, DNA-dependent; transcription factor import into nucleus	GO:0003677 GO:0003700 GO:0005515	DNA binding; protein binding; sequence-specific DNA binding transcription factor activity	GO:0005634	nucleus
Glyma.02G239100	Only K6	up	AT1G65690	Late embryogenesis abundant (LEA) hydroxyproline-rich glycoprotein family		GO:0006865 GO:0008150 GO:0009627 GO:0034976	amino acid transport; biological process; response to endoplasmic reticulum stress; systemic acquired resistance	GO:0003674	molecular function	GO:0005886	plasma membrane
Glyma.02G239500	Only JY93	down	AT5G16370	acyl activating enzyme 5		GO:0008152	metabolic process	GO:0003824	catalytic activity	GO:0005777	peroxisome
Glyma.02G240000	Only JY93	down	AT1G65840	polyamine oxidase 4		GO:0006598 GO:0009611 GO:0009698 GO:0009805 GO:0042398 GO:0055114	cellular modified amino acid biosynthetic process; coumarin biosynthetic process; oxidation-reduction process; phenylpropanoid metabolic process; polyamine catabolic process; response to wounding	GO:0008131 GO:0046592	polyamine oxidase activity; primary amine oxidase activity	GO:0005634 GO:0005777	nucleus; peroxisome
Glyma.02G241400	Only JY93	down	AT5G17330	glutamate decarboxylase		GO:0000041 GO:0006536 GO:0010167 GO:0010359 GO:0015706 GO:0019752 GO:0046686 GO:0048767	carboxylic acid metabolic process; glutamate metabolic process; nitrate transport; regulation of anion channel activity; response to cadmium ion; response to nitrate; root hair elongation; transition metal ion transport	GO:0003824 GO:0004351 GO:0005516 GO:0016831 GO:0030170	calmodulin binding; carboxy-lyase activity; catalytic activity; glutamate decarboxylase activity; pyridoxal phosphate binding	GO:0005829	cytosol
Glyma.02G241700	Only JY93	down	AT2G01990	NA		GO:0008150	biological process	GO:0003674	molecular function	GO:0005634	nucleus
Glyma.02G242700	Only JY93	down	AT1G66150	transmembrane kinase 1		GO:0006468 GO:0007165	protein phosphorylation; signal transduction	GO:0004672 GO:0004674 GO:0004675 GO:0005524 GO:0016772	ATP binding; protein kinase activity; protein serine/threonine kinase activity; transferase activity, transferring phosphorus-containing groups; transmembrane receptor protein serine/threonine kinase activity	GO:0005576 GO:0005886	extracellular region; plasma membrane
Glyma.02G245700	Only K6	up	AT1G18210	Calcium-binding EF-hand family protein		GO:0008150	biological process	GO:0005509	calcium ion binding	GO:0005773 GO:0005886	plasma membrane; vacuole
Glyma.02G247000	Only K6	up	AT5G37840	NA		GO:0008150	biological process	GO:0003674	molecular function	GO:0005634	nucleus
Glyma.02G247600	Only K6	up	AT1G07570	Protein kinase superfamily protein		GO:0006468 GO:0006499	N-terminal protein myristoylation; protein phosphorylation	GO:0004672 GO:0004674 GO:0004713 GO:0005524 GO:0016301 GO:0016772	ATP binding; kinase activity; protein kinase activity; protein serine/threonine kinase activity; protein tyrosine kinase activity; transferase activity, transferring phosphorus-containing groups	GO:0005886 GO:0009507	chloroplast; plasma membrane
Glyma.02G248100	Only K6	up	AT3G55470	Calcium-dependent lipid-binding (CaLB domain) family protein		GO:0006612 GO:0008150 GO:0009963 GO:0010363	biological process; positive regulation of flavonoid biosynthetic process; protein targeting to membrane; regulation of plant-type hypersensitive response	GO:0003674	molecular function	NA	NA
Glyma.02G248500	Only JY93	up	AT2G39700	expansin A4		GO:0006949 GO:0009664 GO:0009826 GO:0009828 GO:0009831	plant-type cell wall loosening; plant-type cell wall modification involved in multidimensional cell growth; plant-type cell wall organization; syncytium formation; unidimensional cell growth	NA	NA	GO:0005576 GO:0005829 GO:0009505 GO:0009506	cytosol; extracellular region; plant-type cell wall; plasmodesma
Glyma.02G249300	Only K6	up	AT3G11430	glycerol-3-phosphate acyltransferase 5		GO:0006655 GO:0008152 GO:0010345	metabolic process; phosphatidylglycerol biosynthetic process; suberin biosynthetic process	GO:0008514 GO:0016746 GO:0090447	glycerol-3-phosphate 2-O-acyltransferase activity; organic anion transmembrane transporter activity; transferase activity, transferring acyl groups	NA	NA
Glyma.02G250700	Only JY93	up	AT3G55580	Regulator of chromosome condensation (RCC1) family protein		GO:0008150	biological process	NA	NA	GO:0005737	cytoplasm
Glyma.02G251900	Only K6	up	AT3G55640	Mitochondrial substrate carrier family protein		GO:0006810 GO:0006839 GO:0055085	mitochondrial transport; transmembrane transport; transport	GO:0005215	transporter activity	GO:0005739 GO:0005743 GO:0005886	mitochondrial inner membrane; mitochondrion; plasma membrane
Glyma.02G252900	Only JY93	up	AT5G05840	Protein of unknown function (DUF620)		GO:0008150	biological process	GO:0003674	molecular function	GO:0005634	nucleus
Glyma.02G254600	Only K6	up	AT2G39980	HXXXD-type acyl-transferase family protein		GO:0080167	response to karrikin	GO:0016740 GO:0016747	transferase activity; transferase activity, transferring acyl groups other than amino-acyl groups	GO:0005737	cytoplasm
Glyma.02G255300	Only K6	up	NA	NA		NA	NA	NA	NA	NA	NA
Glyma.02G256900	Only JY93	up	AT2G40095	Alpha/beta hydrolase related protein		GO:0008150	biological process	GO:0003674	molecular function	GO:0005739	mitochondrion
Glyma.02G259200	Only JY93	up	AT5G01790	NA		GO:0008150 GO:0042546	biological process; cell wall biogenesis	GO:0003674	molecular function	GO:0009507	chloroplast
Glyma.02G260800	Only K6	up	AT4G14270	Protein containing PAM2 motif which mediates interaction with the PABC domain of polyadenyl binding proteins.		GO:0008150	biological process	GO:0003674	molecular function	GO:0005634	nucleus
Glyma.02G261700	Only JY93	down	AT2G40340	Integrase-type DNA-binding superfamily protein	ERF	GO:0006355 GO:0009737 GO:0010286	heat acclimation; regulation of transcription, DNA-dependent; response to abscisic acid stimulus	GO:0003677 GO:0003700 GO:0005515	DNA binding; protein binding; sequence-specific DNA binding transcription factor activity	GO:0005634	nucleus
Glyma.02G262500	Only K6	up	AT2G40300	ferritin 4		GO:0000302 GO:0006826 GO:0006879 GO:0009793 GO:0009908 GO:0010027 GO:0010039 GO:0010228 GO:0015979 GO:0016226 GO:0048366 GO:0048481 GO:0055072 GO:0055114	cellular iron ion homeostasis; embryo development ending in seed dormancy; flower development; iron-sulfur cluster assembly; iron ion homeostasis; iron ion transport; leaf development; ovule development; oxidation-reduction process; photosynthesis; response to iron ion; response to reactive oxygen species; thylakoid membrane organization; vegetative to reproductive phase transition of meristem	GO:0008199 GO:0016491 GO:0046914	ferric iron binding; oxidoreductase activity; transition metal ion binding	GO:0005739 GO:0009507 GO:0009570 GO:0009941	chloroplast; chloroplast envelope; chloroplast stroma; mitochondrion
Glyma.02G265900	Only K6	up	AT2G44310	Calcium-binding EF-hand family protein		GO:0008150	biological process	GO:0005509	calcium ion binding	GO:0005634 GO:0005829	cytosol; nucleus
Glyma.02G267100	Only JY93	up	AT5G14180	Myzus persicae-induced lipase 1		GO:0002213 GO:0006629 GO:0006635 GO:0009062	defense response to insect; fatty acid beta-oxidation; fatty acid catabolic process; lipid metabolic process	GO:0003824 GO:0016298	catalytic activity; lipase activity	GO:0005576	extracellular region
Glyma.02G267800	Only JY93	up	AT2G32950	Transducin/WD40 repeat-like superfamily protein		GO:0006281 GO:0009640 GO:0009641 GO:0009647 GO:0009649 GO:0009963 GO:0010100 GO:0010119 GO:0010224 GO:0046283 GO:0048573 GO:0048608	DNA repair; anthocyanin-containing compound metabolic process; entrainment of circadian clock; negative regulation of photomorphogenesis; photomorphogenesis; photoperiodism, flowering; positive regulation of flavonoid biosynthetic process; regulation of stomatal movement; reproductive structure development; response to UV-B; shade avoidance; skotomorphogenesis	GO:0004842 GO:0005515	protein binding; ubiquitin-protein ligase activity	GO:0000152 GO:0005634 GO:0016604 GO:0080008	CUL4-RING ubiquitin ligase complex; nuclear body; nuclear ubiquitin ligase complex; nucleus
Glyma.02G267900	Only K6	down	AT1G05000	Phosphotyrosine protein phosphatases superfamily protein		GO:0007243 GO:0016311 GO:0043407	dephosphorylation; intracellular protein kinase cascade; negative regulation of MAP kinase activity	GO:0004721 GO:0004725 GO:0016791	phosphatase activity; phosphoprotein phosphatase activity; protein tyrosine phosphatase activity	GO:0005737	cytoplasm
Glyma.02G268200	Only JY93	up	AT1G05010	ethylene-forming enzyme		GO:0000165 GO:0006612 GO:0009595 GO:0009620 GO:0009693 GO:0009697 GO:0009862 GO:0009867 GO:0010200 GO:0010310 GO:0010363 GO:0030003 GO:0031348 GO:0042742 GO:0043900 GO:0050832 GO:0055114 GO:0070838 GO:0071398	MAPK cascade; cellular cation homeostasis; cellular response to fatty acid; defense response to bacterium; defense response to fungus; detection of biotic stimulus; divalent metal ion transport; ethylene biosynthetic process; jasmonic acid mediated signaling pathway; negative regulation of defense response; oxidation-reduction process; protein targeting to membrane; regulation of hydrogen peroxid…	GO:0009815 GO:0016491 GO:0016706	1-aminocyclopropane-1-carboxylate oxidase activity; oxidoreductase activity; oxidoreductase activity, acting on paired donors, with incorporation or reduction of molecular oxygen, 2-oxoglutarate as one donor, and incorporation of one atom each of oxygen into both donors	GO:0005737	cytoplasm
Glyma.02G268300	Only JY93	up	AT5G04700	Ankyrin repeat family protein		GO:0008150	biological process	GO:0003674	molecular function	GO:0005575	cellular component
Glyma.02G268400	Only K6	up	AT1G05010	ethylene-forming enzyme		GO:0000165 GO:0006612 GO:0009595 GO:0009620 GO:0009693 GO:0009697 GO:0009862 GO:0009867 GO:0010200 GO:0010310 GO:0010363 GO:0030003 GO:0031348 GO:0042742 GO:0043900 GO:0050832 GO:0055114 GO:0070838 GO:0071398	MAPK cascade; cellular cation homeostasis; cellular response to fatty acid; defense response to bacterium; defense response to fungus; detection of biotic stimulus; divalent metal ion transport; ethylene biosynthetic process; jasmonic acid mediated signaling pathway; negative regulation of defense response; oxidation-reduction process; protein targeting to membrane; regulation of hydrogen peroxid…	GO:0009815 GO:0016491 GO:0016706	1-aminocyclopropane-1-carboxylate oxidase activity; oxidoreductase activity; oxidoreductase activity, acting on paired donors, with incorporation or reduction of molecular oxygen, 2-oxoglutarate as one donor, and incorporation of one atom each of oxygen into both donors	GO:0005737	cytoplasm
Glyma.02G270200	Only K6	up	AT3G11780	MD-2-related lipid recognition domain-containing protein / ML domain-containing protein		GO:0008150 GO:0010167 GO:0015706	biological process; nitrate transport; response to nitrate	GO:0003674	molecular function	GO:0005576 GO:0005773	extracellular region; vacuole
Glyma.02G271300	Only K6	up	AT3G21620	ERD (early-responsive to dehydration stress) family protein		GO:0008150	biological process	GO:0003674	molecular function	GO:0005886 GO:0016020	membrane; plasma membrane
Glyma.02G274100	Only JY93	down	AT5G42250	Zinc-binding alcohol dehydrogenase family protein		GO:0055114	oxidation-reduction process	GO:0000166 GO:0008270 GO:0016491	nucleotide binding; oxidoreductase activity; zinc ion binding	GO:0005737	cytoplasm
Glyma.02G274400	Only K6	up	AT2G27080	Late embryogenesis abundant (LEA) hydroxyproline-rich glycoprotein family		GO:0008150	biological process	GO:0003674	molecular function	GO:0005886 GO:0009506	plasma membrane; plasmodesma
Glyma.02G274500	Only K6	up	AT2G27060	Leucine-rich repeat protein kinase family protein		GO:0006468 GO:0007169	protein phosphorylation; transmembrane receptor protein tyrosine kinase signaling pathway	GO:0004672 GO:0004674 GO:0004713 GO:0005524 GO:0016772	ATP binding; protein kinase activity; protein serine/threonine kinase activity; protein tyrosine kinase activity; transferase activity, transferring phosphorus-containing groups	GO:0005886	plasma membrane
Glyma.02G278200	Only K6	up	AT2G26530	Protein of unknown function (DUF1645)		GO:0006612 GO:0008150 GO:0009611 GO:0009612 GO:0009646 GO:0009863 GO:0009867 GO:0010200 GO:0010363	biological process; jasmonic acid mediated signaling pathway; protein targeting to membrane; regulation of plant-type hypersensitive response; response to absence of light; response to chitin; response to mechanical stimulus; response to wounding; salicylic acid mediated signaling pathway	GO:0003674	molecular function	GO:0005886 GO:0009507	chloroplast; plasma membrane
Glyma.02G280100	Only K6	up	AT5G12340	NA		GO:0008150	biological process	GO:0003674	molecular function	GO:0005739	mitochondrion
Glyma.02G280200	Only K6	down	AT5G01110	Tetratricopeptide repeat (TPR)-like superfamily protein		NA	NA	NA	NA	GO:0005739	mitochondrion
Glyma.02G283400	Only JY93	up	AT5G17230	PHYTOENE SYNTHASE		GO:0006636 GO:0006655 GO:0009058 GO:0015995 GO:0016117 GO:0019288	biosynthetic process; carotenoid biosynthetic process; chlorophyll biosynthetic process; isopentenyl diphosphate biosynthetic process, mevalonate-independent pathway; phosphatidylglycerol biosynthetic process; unsaturated fatty acid biosynthetic process	GO:0016740 GO:0016765 GO:0016767 GO:0046905	geranylgeranyl-diphosphate geranylgeranyltransferase activity; phytoene synthase activity; transferase activity; transferase activity, transferring alkyl or aryl (other than methyl) groups	GO:0009507 GO:0010287	chloroplast; plastoglobule
Glyma.02G283500	Only K6	up	AT1G32910	HXXXD-type acyl-transferase family protein		NA	NA	GO:0016740 GO:0016747	transferase activity; transferase activity, transferring acyl groups other than amino-acyl groups	GO:0005737	cytoplasm
Glyma.02G283900	Only JY93	down	AT2G30860	glutathione S-transferase PHI 9		GO:0006546 GO:0006569 GO:0006952 GO:0006970 GO:0009407 GO:0009627 GO:0009684 GO:0010043 GO:0031347 GO:0042742 GO:0046686	defense response; defense response to bacterium; glycine catabolic process; indoleacetic acid biosynthetic process; regulation of defense response; response to cadmium ion; response to osmotic stress; response to zinc ion; systemic acquired resistance; toxin catabolic process; tryptophan catabolic process	GO:0004364 GO:0004602 GO:0005507 GO:0043295	copper ion binding; glutathione binding; glutathione peroxidase activity; glutathione transferase activity	GO:0005737 GO:0005773 GO:0005829 GO:0005886 GO:0009506 GO:0009507 GO:0009570 GO:0009579 GO:0048046	apoplast; chloroplast; chloroplast stroma; cytoplasm; cytosol; plasma membrane; plasmodesma; thylakoid; vacuole
Glyma.02G284100	Only K6	up	AT5G17680	disease resistance protein (TIR-NBS-LRR class), putative		GO:0006952 GO:0007165	defense response; signal transduction	GO:0043531	ADP binding	GO:0005622	intracellular
Glyma.02G284800	Only K6	up	AT3G59080	Eukaryotic aspartyl protease family protein		GO:0006508 GO:0010200 GO:0050832	defense response to fungus; proteolysis; response to chitin	GO:0003677 GO:0004190	DNA binding; aspartic-type endopeptidase activity	GO:0005576	extracellular region
Glyma.02G286000	Only JY93	up	AT3G59110	Protein kinase superfamily protein		GO:0006468 GO:0046777	protein autophosphorylation; protein phosphorylation	GO:0004672 GO:0004674 GO:0005524 GO:0016301 GO:0016772	ATP binding; kinase activity; protein kinase activity; protein serine/threonine kinase activity; transferase activity, transferring phosphorus-containing groups	GO:0005886 GO:0009506	plasma membrane; plasmodesma
Glyma.02G286400	Only JY93	up	AT5G50890	alpha/beta-Hydrolases superfamily protein		NA	NA	NA	NA	GO:0005634	nucleus
Glyma.02G286600	Only K6	down	AT5G41880	DNA primases;DNA primases		GO:0006260 GO:0006261 GO:0006269 GO:0006306 GO:0008283 GO:0051567	DNA-dependent DNA replication; DNA methylation; DNA replication; DNA replication, synthesis of RNA primer; cell proliferation; histone H3-K9 methylation	GO:0003896	DNA primase activity	GO:0005634	nucleus
Glyma.02G288700	Only K6	up	AT1G06460	alpha-crystallin domain 32.1		GO:0009408 GO:0009853 GO:0019252	photorespiration; response to heat; starch biosynthetic process	NA	NA	GO:0005777	peroxisome
Glyma.02G289300	Only K6	up	AT5G54840	Ras-related small GTP-binding family protein		GO:0007264 GO:0016192	small GTPase mediated signal transduction; vesicle-mediated transport	GO:0005525	GTP binding	GO:0005622 GO:0005634	intracellular; nucleus
Glyma.02G290000	Only K6	down	AT5G36110	cytochrome P450, family 716, subfamily A, polypeptide 1		GO:0055114	oxidation-reduction process	GO:0005506 GO:0009055 GO:0016705 GO:0019825 GO:0020037	electron carrier activity; heme binding; iron ion binding; oxidoreductase activity, acting on paired donors, with incorporation or reduction of molecular oxygen; oxygen binding	GO:0005576	extracellular region
Glyma.02G290900	Only K6	up	AT3G20340	Expression of the gene is downregulated in the presence of paraquat, an inducer of photoxidative stress.		GO:0006499 GO:0006979	N-terminal protein myristoylation; response to oxidative stress	GO:0003674	molecular function	GO:0005634	nucleus
Glyma.02G291300	Only K6	up	AT3G20410	calmodulin-domain protein kinase 9		GO:0000165 GO:0006468 GO:0006499 GO:0006612 GO:0007154 GO:0007165 GO:0009409 GO:0009723 GO:0009738 GO:0009862 GO:0009867 GO:0010363 GO:0030968 GO:0031348 GO:0043069 GO:0050832	MAPK cascade; N-terminal protein myristoylation; abscisic acid mediated signaling pathway; cell communication; defense response to fungus; endoplasmic reticulum unfolded protein response; jasmonic acid mediated signaling pathway; negative regulation of defense response; negative regulation of programmed cell death; protein phosphorylation; protein targeting to membrane; regulation of plant-type h…	GO:0004672 GO:0004674 GO:0004683 GO:0005509 GO:0005524 GO:0016301 GO:0016772	ATP binding; calcium ion binding; calmodulin-dependent protein kinase activity; kinase activity; protein kinase activity; protein serine/threonine kinase activity; transferase activity, transferring phosphorus-containing groups	GO:0005634 GO:0005886	nucleus; plasma membrane
Glyma.02G291700	Only JY93	up	AT4G21970	Protein of unknown function, DUF584		GO:0008150	biological process	GO:0003674	molecular function	GO:0005634	nucleus
Glyma.02G296600	Only K6	up	AT2G40140	zinc finger (CCCH-type) family protein	C3H	GO:0002679 GO:0006355 GO:0006612 GO:0006944 GO:0009409 GO:0009863 GO:0010200 GO:0010363 GO:0030968 GO:0035556 GO:0043069 GO:0050832	cellular membrane fusion; defense response to fungus; endoplasmic reticulum unfolded protein response; intracellular signal transduction; negative regulation of programmed cell death; protein targeting to membrane; regulation of plant-type hypersensitive response; regulation of transcription, DNA-dependent; respiratory burst involved in defense response; response to chitin; response to cold; sali…	GO:0003676 GO:0003700 GO:0008270	nucleic acid binding; sequence-specific DNA binding transcription factor activity; zinc ion binding	GO:0005634	nucleus
Glyma.02G297200	Only K6	up	AT5G55560	Protein kinase superfamily protein		GO:0006468 GO:0010260	organ senescence; protein phosphorylation	GO:0004672 GO:0005524 GO:0016301 GO:0016772	ATP binding; kinase activity; protein kinase activity; transferase activity, transferring phosphorus-containing groups	GO:0005634	nucleus
Glyma.02G299100	Only K6	up	AT3G13110	serine acetyltransferase 2;2		GO:0006535 GO:0006569 GO:0009684 GO:0019344 GO:0019761 GO:0046686	cysteine biosynthetic process; cysteine biosynthetic process from serine; glucosinolate biosynthetic process; indoleacetic acid biosynthetic process; response to cadmium ion; tryptophan catabolic process	GO:0005515 GO:0008270 GO:0009001 GO:0016740	protein binding; serine O-acetyltransferase activity; transferase activity; zinc ion binding	GO:0005737 GO:0005739 GO:0009507	chloroplast; cytoplasm; mitochondrion
Glyma.02G301100	Only JY93	up	AT5G55850	RPM1-interacting protein 4 (RIN4) family protein		GO:0006944 GO:0010167 GO:0048193	Golgi vesicle transport; cellular membrane fusion; response to nitrate	GO:0003674	molecular function	GO:0005634 GO:0005886	nucleus; plasma membrane
Glyma.02G303200	Only JY93	down	AT3G13275	NA		GO:0008150	biological process	GO:0003674	molecular function	GO:0005576	extracellular region
Glyma.02G305600	Only JY93	up	AT3G07770	HEAT SHOCK PROTEIN 89.1		GO:0006457	protein folding	GO:0005524 GO:0051082	ATP binding; unfolded protein binding	GO:0005618 GO:0005739 GO:0009507 GO:0009570	cell wall; chloroplast; chloroplast stroma; mitochondrion
Glyma.02G308600	Only JY93	down	AT3G07700	Protein kinase superfamily protein		NA	NA	GO:0016772	transferase activity, transferring phosphorus-containing groups	GO:0005886 GO:0009507	chloroplast; plasma membrane
Glyma.02G309300	Only JY93	up	AT2G37040	PHE ammonia lyase 1		GO:0006559 GO:0006598 GO:0006952 GO:0006979 GO:0009058 GO:0009555 GO:0009611 GO:0009698 GO:0009699 GO:0009805 GO:0009819 GO:0009963 GO:0010224 GO:0042398 GO:0046244 GO:0046274 GO:0080167	L-phenylalanine catabolic process; biosynthetic process; cellular modified amino acid biosynthetic process; coumarin biosynthetic process; defense response; drought recovery; lignin catabolic process; phenylpropanoid biosynthetic process; phenylpropanoid metabolic process; pollen development; polyamine catabolic process; positive regulation of flavonoid biosynthetic process; response to UV-B; res…	GO:0003824 GO:0016841 GO:0045548	ammonia-lyase activity; catalytic activity; phenylalanine ammonia-lyase activity	GO:0005737	cytoplasm
Glyma.02G311200	Only K6	up	AT2G17220	Protein kinase superfamily protein		GO:0006468 GO:0006995 GO:0009627 GO:0009697 GO:0009863 GO:0010200 GO:0031347 GO:0031348 GO:0045087 GO:0050832	cellular response to nitrogen starvation; defense response to fungus; innate immune response; negative regulation of defense response; protein phosphorylation; regulation of defense response; response to chitin; salicylic acid biosynthetic process; salicylic acid mediated signaling pathway; systemic acquired resistance	GO:0004672 GO:0004674 GO:0004713 GO:0005524 GO:0016301 GO:0016772	ATP binding; kinase activity; protein kinase activity; protein serine/threonine kinase activity; protein tyrosine kinase activity; transferase activity, transferring phosphorus-containing groups	GO:0005886 GO:0009507	chloroplast; plasma membrane
Glyma.03G001300	Only K6	down	AT1G09220	Pentatricopeptide repeat (PPR) superfamily protein		GO:0008150	biological process	NA	NA	GO:0005739 GO:0022626	cytosolic ribosome; mitochondrion
Glyma.03G001500	Only K6	up	AT2G38600	HAD superfamily, subfamily IIIB acid phosphatase		NA	NA	GO:0003993	acid phosphatase activity	NA	NA
Glyma.03G001800	Only K6	up	AT3G08710	thioredoxin H-type 9		GO:0006499 GO:0006662 GO:0007154 GO:0045454	N-terminal protein myristoylation; cell communication; cell redox homeostasis; glycerol ether metabolic process	GO:0009055 GO:0015035	electron carrier activity; protein disulfide oxidoreductase activity	GO:0005634 GO:0005737 GO:0005829 GO:0005886 GO:0009536	cytoplasm; cytosol; nucleus; plasma membrane; plastid
Glyma.03G002600	Only JY93	down	AT4G01037	Ubiquitin carboxyl-terminal hydrolase family protein		NA	NA	NA	NA	GO:0005576	extracellular region
Glyma.03G002800	Only K6	up	AT2G30290	VACUOLAR SORTING RECEPTOR 2		GO:0006623	protein targeting to vacuole	GO:0005509	calcium ion binding	GO:0005634 GO:0005887 GO:0017119	Golgi transport complex; integral to plasma membrane; nucleus
Glyma.03G002900	Only K6	up	AT4G00340	receptor-like protein kinase 4		GO:0006468 GO:0048544	protein phosphorylation; recognition of pollen	GO:0004672 GO:0004674 GO:0004713 GO:0005524 GO:0016772 GO:0030246	ATP binding; carbohydrate binding; protein kinase activity; protein serine/threonine kinase activity; protein tyrosine kinase activity; transferase activity, transferring phosphorus-containing groups	GO:0005886 GO:0016020	membrane; plasma membrane
Glyma.03G003000	Only K6	up	AT2G19130	S-locus lectin protein kinase family protein		GO:0006468 GO:0048544	protein phosphorylation; recognition of pollen	GO:0004672 GO:0004674 GO:0005524 GO:0016772 GO:0030246	ATP binding; carbohydrate binding; protein kinase activity; protein serine/threonine kinase activity; transferase activity, transferring phosphorus-containing groups	GO:0005886	plasma membrane
Glyma.03G005600	Only JY93	up	AT1G33110	MATE efflux family protein		GO:0006855 GO:0009610 GO:0019344 GO:0055085	cysteine biosynthetic process; drug transmembrane transport; response to symbiotic fungus; transmembrane transport	GO:0005215 GO:0015238 GO:0015297	antiporter activity; drug transmembrane transporter activity; transporter activity	GO:0005886 GO:0016020	membrane; plasma membrane
Glyma.03G008800	Only K6	up	AT2G45910	U-box domain-containing protein kinase family protein		GO:0006468 GO:0016567	protein phosphorylation; protein ubiquitination	GO:0004672 GO:0004674 GO:0004842 GO:0005524 GO:0016301 GO:0016772	ATP binding; kinase activity; protein kinase activity; protein serine/threonine kinase activity; transferase activity, transferring phosphorus-containing groups; ubiquitin-protein ligase activity	GO:0000151 GO:0005886	plasma membrane; ubiquitin ligase complex
Glyma.03G011200	Only K6	up	AT2G45850	AT hook motif DNA-binding family protein		GO:0008150 GO:0010103	biological process; stomatal complex morphogenesis	GO:0003677	DNA binding	GO:0005634	nucleus
Glyma.03G012000	Only K6	down	NA	NA		NA	NA	NA	NA	NA	NA
Glyma.03G013400	Only K6	up	AT3G61260	Remorin family protein		GO:0008150	biological process	NA	NA	GO:0005737 GO:0005773 GO:0005886 GO:0009506	cytoplasm; plasma membrane; plasmodesma; vacuole
Glyma.03G015800	Only K6	up	AT2G45760	BON association protein 2		GO:0008150 GO:0009627 GO:0009693 GO:0009697	biological process; ethylene biosynthetic process; salicylic acid biosynthetic process; systemic acquired resistance	GO:0003674	molecular function	GO:0005575	cellular component
Glyma.03G016100	Only K6	up	AT2G45760	BON association protein 2		GO:0008150 GO:0009627 GO:0009693 GO:0009697	biological process; ethylene biosynthetic process; salicylic acid biosynthetic process; systemic acquired resistance	GO:0003674	molecular function	GO:0005575	cellular component
Glyma.03G016300	Only K6	up	AT2G45760	BON association protein 2		GO:0008150 GO:0009627 GO:0009693 GO:0009697	biological process; ethylene biosynthetic process; salicylic acid biosynthetic process; systemic acquired resistance	GO:0003674	molecular function	GO:0005575	cellular component
Glyma.03G016400	Only K6	up	AT2G45760	BON association protein 2		GO:0008150 GO:0009627 GO:0009693 GO:0009697	biological process; ethylene biosynthetic process; salicylic acid biosynthetic process; systemic acquired resistance	GO:0003674	molecular function	GO:0005575	cellular component
Glyma.03G017500	Only K6	down	AT4G10160	RING/U-box superfamily protein		GO:0016567	protein ubiquitination	GO:0004842 GO:0008270	ubiquitin-protein ligase activity; zinc ion binding	GO:0005634	nucleus
Glyma.03G021900	Only JY93	up	AT2G45480	growth-regulating factor 9		GO:0006355 GO:0048366	leaf development; regulation of transcription, DNA-dependent	GO:0005524 GO:0016818	ATP binding; hydrolase activity, acting on acid anhydrides, in phosphorus-containing anhydrides	GO:0005634	nucleus
Glyma.03G023700	Only JY93	up	AT1G35710	Protein kinase family protein with leucine-rich repeat domain		GO:0000165 GO:0006468 GO:0007169 GO:0009814	MAPK cascade; defense response, incompatible interaction; protein phosphorylation; transmembrane receptor protein tyrosine kinase signaling pathway	GO:0004672 GO:0004674 GO:0004713 GO:0005524 GO:0016772	ATP binding; protein kinase activity; protein serine/threonine kinase activity; protein tyrosine kinase activity; transferase activity, transferring phosphorus-containing groups	GO:0005886	plasma membrane
Glyma.03G027200	Only K6	up	AT4G08850	Leucine-rich repeat receptor-like protein kinase family protein		GO:0006468 GO:0006857 GO:0006995 GO:0009627 GO:0031347	cellular response to nitrogen starvation; oligopeptide transport; protein phosphorylation; regulation of defense response; systemic acquired resistance	GO:0004672 GO:0004713 GO:0005524 GO:0016301 GO:0016772	ATP binding; kinase activity; protein kinase activity; protein tyrosine kinase activity; transferase activity, transferring phosphorus-containing groups	GO:0005634 GO:0005886 GO:0009506 GO:0016020	membrane; nucleus; plasma membrane; plasmodesma
Glyma.03G028000	Only K6	up	AT4G08870	Arginase/deacetylase superfamily protein		GO:0006560 GO:0006570 GO:0006591 GO:0006595 GO:0009445 GO:0050832	defense response to fungus; ornithine metabolic process; polyamine metabolic process; proline metabolic process; putrescine metabolic process; tyrosine metabolic process	GO:0004053 GO:0008783 GO:0016813 GO:0046872 GO:0050897	agmatinase activity; arginase activity; cobalt ion binding; hydrolase activity, acting on carbon-nitrogen (but not peptide) bonds, in linear amidines; metal ion binding	GO:0005739 GO:0009507	chloroplast; mitochondrion
Glyma.03G029300	Only JY93	down	AT4G32760	ENTH/VHS/GAT family protein		GO:0000902 GO:0006487 GO:0006623 GO:0006886 GO:0006891 GO:0006944 GO:0016049 GO:0016192 GO:0048193	Golgi vesicle transport; cell growth; cell morphogenesis; cellular membrane fusion; intra-Golgi vesicle-mediated transport; intracellular protein transport; protein N-linked glycosylation; protein targeting to vacuole; vesicle-mediated transport	GO:0008565	protein transporter activity	GO:0005622 GO:0005795 GO:0005886	Golgi stack; intracellular; plasma membrane
Glyma.03G030600	Only JY93	down	AT4G31500	cytochrome P450, family 83, subfamily B, polypeptide 1		GO:0000096 GO:0000162 GO:0006520 GO:0006546 GO:0006569 GO:0006636 GO:0006733 GO:0006766 GO:0008652 GO:0009072 GO:0009106 GO:0009108 GO:0009117 GO:0009641 GO:0009682 GO:0009684 GO:0009695 GO:0009759 GO:0010114 GO:0019288 GO:0019748 GO:0019761 GO:0042742 GO:0044272 GO:0048830 GO:0052544 GO:0055114	adventitious root development; aromatic amino acid family metabolic process; cellular amino acid biosynthetic process; cellular amino acid metabolic process; coenzyme biosynthetic process; defense response by callose deposition in cell wall; defense response to bacterium; glucosinolate biosynthetic process; glycine catabolic process; indole glucosinolate biosynthetic process; indoleacetic acid bi…	GO:0005506 GO:0009055 GO:0016705 GO:0016709 GO:0019825 GO:0020037	electron carrier activity; heme binding; iron ion binding; oxidoreductase activity, acting on paired donors, with incorporation or reduction of molecular oxygen; oxidoreductase activity, acting on paired donors, with incorporation or reduction of molecular oxygen, NAD(P)H as one donor, and incorporation of one atom of oxygen; oxygen binding	GO:0005739 GO:0005783 GO:0005886 GO:0016020	endoplasmic reticulum; membrane; mitochondrion; plasma membrane
Glyma.03G031000	Only JY93	down	AT4G31500	cytochrome P450, family 83, subfamily B, polypeptide 1		GO:0000096 GO:0000162 GO:0006520 GO:0006546 GO:0006569 GO:0006636 GO:0006733 GO:0006766 GO:0008652 GO:0009072 GO:0009106 GO:0009108 GO:0009117 GO:0009641 GO:0009682 GO:0009684 GO:0009695 GO:0009759 GO:0010114 GO:0019288 GO:0019748 GO:0019761 GO:0042742 GO:0044272 GO:0048830 GO:0052544 GO:0055114	adventitious root development; aromatic amino acid family metabolic process; cellular amino acid biosynthetic process; cellular amino acid metabolic process; coenzyme biosynthetic process; defense response by callose deposition in cell wall; defense response to bacterium; glucosinolate biosynthetic process; glycine catabolic process; indole glucosinolate biosynthetic process; indoleacetic acid bi…	GO:0005506 GO:0009055 GO:0016705 GO:0016709 GO:0019825 GO:0020037	electron carrier activity; heme binding; iron ion binding; oxidoreductase activity, acting on paired donors, with incorporation or reduction of molecular oxygen; oxidoreductase activity, acting on paired donors, with incorporation or reduction of molecular oxygen, NAD(P)H as one donor, and incorporation of one atom of oxygen; oxygen binding	GO:0005739 GO:0005783 GO:0005886 GO:0016020	endoplasmic reticulum; membrane; mitochondrion; plasma membrane
Glyma.03G033200	Only JY93	down	AT1G12244	Polynucleotidyl transferase, ribonuclease H-like superfamily protein		GO:0006139 GO:0006281 GO:0006310 GO:0006974	DNA recombination; DNA repair; nucleobase-containing compound metabolic process; response to DNA damage stimulus	GO:0003676 GO:0016788	hydrolase activity, acting on ester bonds; nucleic acid binding	GO:0005737 GO:0009507	chloroplast; cytoplasm
Glyma.03G033600	Only JY93	down	AT3G60580	C2H2-like zinc finger protein	C2H2	GO:0006355	regulation of transcription, DNA-dependent	GO:0003676 GO:0003700 GO:0008270	nucleic acid binding; sequence-specific DNA binding transcription factor activity; zinc ion binding	GO:0005622 GO:0005634	intracellular; nucleus
Glyma.03G035300	Only K6	up	AT3G08760	Protein kinase superfamily protein		GO:0006468 GO:0006914	autophagy; protein phosphorylation	GO:0004672 GO:0005524 GO:0016301 GO:0016772	ATP binding; kinase activity; protein kinase activity; transferase activity, transferring phosphorus-containing groups	GO:0005886	plasma membrane
Glyma.03G036600	Only K6	down	AT5G01840	ovate family protein 1		GO:0006499 GO:0045892 GO:0048513 GO:0051510	N-terminal protein myristoylation; negative regulation of transcription, DNA-dependent; organ development; regulation of unidimensional cell growth	GO:0005515	protein binding	GO:0005634 GO:0005730 GO:0005856	cytoskeleton; nucleolus; nucleus
Glyma.03G037600	Only K6	down	NA	NA		NA	NA	NA	NA	NA	NA
Glyma.03G042700	Only K6	up	AT2G38470	WRKY DNA-binding protein 33	WRKY	GO:0000165 GO:0002679 GO:0006355 GO:0006612 GO:0006944 GO:0006970 GO:0009408 GO:0009409 GO:0009414 GO:0009595 GO:0009651 GO:0009697 GO:0009862 GO:0009863 GO:0009867 GO:0010120 GO:0010200 GO:0010310 GO:0010363 GO:0010508 GO:0031348 GO:0034605 GO:0035556 GO:0042742 GO:0043069 GO:0043900 GO:0050832 GO:0070370	MAPK cascade; camalexin biosynthetic process; cellular heat acclimation; cellular membrane fusion; cellular response to heat; defense response to bacterium; defense response to fungus; detection of biotic stimulus; intracellular signal transduction; jasmonic acid mediated signaling pathway; negative regulation of defense response; negative regulation of programmed cell death; positive regulation …	GO:0003700 GO:0005515	protein binding; sequence-specific DNA binding transcription factor activity	GO:0005634	nucleus
Glyma.03G045400	Only K6	up	AT5G01710	methyltransferases		GO:0006944 GO:0008152 GO:0048193	Golgi vesicle transport; cellular membrane fusion; metabolic process	GO:0008168	methyltransferase activity	NA	NA
Glyma.03G048600	Only JY93	up	AT5G51630	Disease resistance protein (TIR-NBS-LRR class) family		GO:0006952 GO:0007165	defense response; signal transduction	GO:0000166 GO:0017111 GO:0043531	ADP binding; nucleoside-triphosphatase activity; nucleotide binding	GO:0005622 GO:0005737	cytoplasm; intracellular
Glyma.03G051100	Only JY93	up	AT5G01550	lectin receptor kinase a4.1		GO:0006468 GO:0009738 GO:0009845 GO:0010200	abscisic acid mediated signaling pathway; protein phosphorylation; response to chitin; seed germination	GO:0004672 GO:0004674 GO:0005524 GO:0016301 GO:0016772	ATP binding; kinase activity; protein kinase activity; protein serine/threonine kinase activity; transferase activity, transferring phosphorus-containing groups	GO:0005886	plasma membrane
Glyma.03G051600	Only JY93	down	AT3G51780	BCL-2-associated athanogene 4		GO:0009409 GO:0009651 GO:0010228	response to cold; response to salt stress; vegetative to reproductive phase transition of meristem	GO:0051087	chaperone binding	GO:0005634 GO:0005829	cytosol; nucleus
Glyma.03G054900	Only JY93	up	AT4G27290	S-locus lectin protein kinase family protein		GO:0006468 GO:0048544 GO:0048765	protein phosphorylation; recognition of pollen; root hair cell differentiation	GO:0004672 GO:0004674 GO:0004713 GO:0005524 GO:0016772 GO:0030246	ATP binding; carbohydrate binding; protein kinase activity; protein serine/threonine kinase activity; protein tyrosine kinase activity; transferase activity, transferring phosphorus-containing groups	GO:0005886	plasma membrane
Glyma.03G059200	Only JY93	up	AT3G51870	Mitochondrial substrate carrier family protein		GO:0006810 GO:0009624 GO:0055085	response to nematode; transmembrane transport; transport	GO:0005215	transporter activity	GO:0005739 GO:0005743 GO:0009507 GO:0009941	chloroplast; chloroplast envelope; mitochondrial inner membrane; mitochondrion
Glyma.03G059800	Only JY93	down	AT4G36360	beta-galactosidase 3		GO:0005975 GO:0005990 GO:0006598 GO:0009664 GO:0009698 GO:0009832 GO:0010075 GO:0019513 GO:0019515 GO:0042398	carbohydrate metabolic process; cellular modified amino acid biosynthetic process; lactose catabolic process; lactose catabolic process, using glucoside 3-dehydrogenase; lactose catabolic process via UDP-galactose; phenylpropanoid metabolic process; plant-type cell wall biogenesis; plant-type cell wall organization; polyamine catabolic process; regulation of meristem growth	GO:0003824 GO:0004553 GO:0004565 GO:0030246 GO:0043169	beta-galactosidase activity; carbohydrate binding; catalytic activity; cation binding; hydrolase activity, hydrolyzing O-glycosyl compounds	GO:0005576	extracellular region
Glyma.03G060000	Only K6	up	AT5G01520	RING/U-box superfamily protein		GO:0015996	chlorophyll catabolic process	GO:0008270	zinc ion binding	GO:0005634 GO:0005829	cytosol; nucleus
Glyma.03G061700	Only K6	up	AT5G01260	Carbohydrate-binding-like fold		GO:0005975 GO:0010264	carbohydrate metabolic process; myo-inositol hexakisphosphate biosynthetic process	GO:0003824 GO:0030246 GO:2001070	carbohydrate binding; catalytic activity; starch binding	GO:0005576	extracellular region
Glyma.03G063400	Only K6	up	AT4G31980	NA		GO:0006865 GO:0008150	amino acid transport; biological process	GO:0003674	molecular function	GO:0005886	plasma membrane
Glyma.03G064000	Only K6	up	AT3G53960	Major facilitator superfamily protein		GO:0006857 GO:0009718	anthocyanin-containing compound biosynthetic process; oligopeptide transport	GO:0005215	transporter activity	GO:0005886 GO:0016020	membrane; plasma membrane
Glyma.03G068100	Only JY93	up	AT2G39730	rubisco activase		GO:0000165 GO:0006612 GO:0009409 GO:0009416 GO:0009595 GO:0009637 GO:0009644 GO:0009697 GO:0009744 GO:0009753 GO:0009814 GO:0009862 GO:0009867 GO:0010114 GO:0010150 GO:0010155 GO:0010200 GO:0010218 GO:0010310 GO:0010363 GO:0019684 GO:0031348 GO:0042742 GO:0043900 GO:0050832	MAPK cascade; defense response, incompatible interaction; defense response to bacterium; defense response to fungus; detection of biotic stimulus; jasmonic acid mediated signaling pathway; leaf senescence; negative regulation of defense response; photosynthesis, light reaction; protein targeting to membrane; regulation of hydrogen peroxide metabolic process; regulation of multi-organism process; …	GO:0005524 GO:0030234 GO:0043531 GO:0046863	ADP binding; ATP binding; enzyme regulator activity; ribulose-1,5-bisphosphate carboxylase/oxygenase activator activity	GO:0005618 GO:0005634 GO:0009507 GO:0009535 GO:0009570 GO:0009579 GO:0009941 GO:0010287 GO:0010319 GO:0016020 GO:0048046	apoplast; cell wall; chloroplast; chloroplast envelope; chloroplast stroma; chloroplast thylakoid membrane; membrane; nucleus; plastoglobule; stromule; thylakoid
Glyma.03G069300	Only K6	up	AT3G55550	Concanavalin A-like lectin protein kinase family protein		GO:0006468	protein phosphorylation	GO:0004672 GO:0004674 GO:0005524 GO:0016301 GO:0016772	ATP binding; kinase activity; protein kinase activity; protein serine/threonine kinase activity; transferase activity, transferring phosphorus-containing groups	GO:0005886	plasma membrane
Glyma.03G070300	Only JY93	up	AT5G09640	serine carboxypeptidase-like 19		GO:0006508 GO:0019748	proteolysis; secondary metabolic process	GO:0004185 GO:0016752	serine-type carboxypeptidase activity; sinapoyltransferase activity	GO:0005576	extracellular region
Glyma.03G071700	Only K6	up	AT3G53950	glyoxal oxidase-related protein		GO:0008150	biological process	GO:0003674	molecular function	GO:0005576	extracellular region
Glyma.03G074900	Only K6	down	AT2G37980	O-fucosyltransferase family protein		GO:0008150	biological process	GO:0016757	transferase activity, transferring glycosyl groups	GO:0005794	Golgi apparatus
Glyma.03G076200	Only JY93	up	AT3G54120	Reticulon family protein		GO:0008150	biological process	GO:0003674	molecular function	GO:0005783	endoplasmic reticulum
Glyma.03G080500	Only JY93	down	AT1G29195	NA		GO:0008150	biological process	GO:0003674	molecular function	GO:0009507	chloroplast
Glyma.03G081700	Only JY93	up	AT3G17609	HY5-homolog	bZIP	GO:0006355 GO:0009410 GO:0010224 GO:0030968 GO:0080167	endoplasmic reticulum unfolded protein response; regulation of transcription, DNA-dependent; response to UV-B; response to karrikin; response to xenobiotic stimulus	GO:0003677 GO:0003700 GO:0005515 GO:0043565 GO:0046983	DNA binding; protein binding; protein dimerization activity; sequence-specific DNA binding; sequence-specific DNA binding transcription factor activity	GO:0005634	nucleus
Glyma.03G082100	Only JY93	down	AT3G09390	metallothionein 2A		GO:0006878	cellular copper ion homeostasis	GO:0005507 GO:0046872	copper ion binding; metal ion binding	NA	NA
Glyma.03G082900	Only JY93	down	AT5G02440	NA		GO:0008150	biological process	GO:0003674	molecular function	GO:0005739	mitochondrion
Glyma.03G083200	Only JY93	up	AT5G02230	Haloacid dehalogenase-like hydrolase (HAD) superfamily protein		GO:0008152	metabolic process	GO:0003824 GO:0016787	catalytic activity; hydrolase activity	NA	NA
Glyma.03G084300	Only JY93	up	AT3G07250	nuclear transport factor 2 (NTF2) family protein / RNA recognition motif (RRM)-containing protein		GO:0006810 GO:0006913	nucleocytoplasmic transport; transport	GO:0000166 GO:0003676 GO:0003723	RNA binding; nucleic acid binding; nucleotide binding	GO:0005622 GO:0005634 GO:0009506	intracellular; nucleus; plasmodesma
Glyma.03G085900	Only JY93	down	AT3G07310	Protein of unknown function (DUF760)		GO:0008150 GO:0009740 GO:0010162	biological process; gibberellic acid mediated signaling pathway; seed dormancy process	GO:0003674	molecular function	GO:0009507	chloroplast
Glyma.03G086200	Only JY93	up	AT3G25230	rotamase FKBP 1		GO:0000413 GO:0006457 GO:0006499 GO:0006970 GO:0009408 GO:0009611 GO:0009644 GO:0009845 GO:0018208 GO:0034976 GO:0042542 GO:0046686 GO:0070370	N-terminal protein myristoylation; cellular heat acclimation; peptidyl-proline modification; protein folding; protein peptidyl-prolyl isomerization; response to cadmium ion; response to endoplasmic reticulum stress; response to heat; response to high light intensity; response to hydrogen peroxide; response to osmotic stress; response to wounding; seed germination	GO:0003755 GO:0005515 GO:0005516 GO:0005528 GO:0032266 GO:0080025	FK506 binding; calmodulin binding; peptidyl-prolyl cis-trans isomerase activity; phosphatidylinositol-3,5-bisphosphate binding; phosphatidylinositol-3-phosphate binding; protein binding	GO:0005634 GO:0005737 GO:0005829 GO:0016020 GO:0071944	cell periphery; cytoplasm; cytosol; membrane; nucleus
Glyma.03G088900	Only K6	up	AT3G07390	auxin-responsive family protein		GO:0006007 GO:0009733 GO:0010102 GO:0030198	extracellular matrix organization; glucose catabolic process; lateral root morphogenesis; response to auxin stimulus	GO:0005201	extracellular matrix structural constituent	GO:0005576 GO:0005886 GO:0031225 GO:0046658	anchored to membrane; anchored to plasma membrane; extracellular region; plasma membrane
Glyma.03G091100	Only K6	up	AT3G48770	DNA binding;ATP binding		GO:0008150	biological process	GO:0003677 GO:0005524	ATP binding; DNA binding	GO:0005737	cytoplasm
Glyma.03G092800	Only K6	down	AT3G03530	non-specific phospholipase C4		GO:0009395	phospholipid catabolic process	GO:0004629 GO:0016788	hydrolase activity, acting on ester bonds; phospholipase C activity	GO:0005886	plasma membrane
Glyma.03G098300	Only JY93	down	AT1G64850	Calcium-binding EF hand family protein		GO:0008150	biological process	GO:0005509	calcium ion binding	GO:0009536	plastid
Glyma.03G098800	Only JY93	down	AT5G16970	alkenal reductase		GO:0006865 GO:0006979 GO:0009407 GO:0010583 GO:0015824 GO:0046686	amino acid transport; proline transport; response to cadmium ion; response to cyclopentenone; response to oxidative stress; toxin catabolic process	GO:0000166 GO:0008270 GO:0016491 GO:0016747 GO:0032440	2-alkenal reductase [NAD(P)] activity; nucleotide binding; oxidoreductase activity; transferase activity, transferring acyl groups other than amino-acyl groups; zinc ion binding	GO:0005634 GO:0005737 GO:0005829	cytoplasm; cytosol; nucleus
Glyma.03G099600	Only JY93	down	NA	NA		NA	NA	NA	NA	NA	NA
Glyma.03G101000	Only JY93	up	AT3G60160	multidrug resistance-associated protein 9		GO:0006810 GO:0009624 GO:0055085	response to nematode; transmembrane transport; transport	GO:0000166 GO:0005524 GO:0016887 GO:0017111 GO:0042626	ATP binding; ATPase activity; ATPase activity, coupled to transmembrane movement of substances; nucleoside-triphosphatase activity; nucleotide binding	GO:0005886 GO:0009506 GO:0016021	integral to membrane; plasma membrane; plasmodesma
Glyma.03G101700	Only K6	up	AT1G02205	Fatty acid hydroxylase superfamily		GO:0009414 GO:0010025 GO:0042335 GO:0042742 GO:0043447 GO:0046185 GO:0050832	aldehyde catabolic process; alkane biosynthetic process; cuticle development; defense response to bacterium; defense response to fungus; response to water deprivation; wax biosynthetic process	GO:0005506 GO:0016491 GO:0071771	aldehyde decarbonylase activity; iron ion binding; oxidoreductase activity	NA	NA
Glyma.03G101800	Only K6	up	AT1G02205	Fatty acid hydroxylase superfamily		GO:0009414 GO:0010025 GO:0042335 GO:0042742 GO:0043447 GO:0046185 GO:0050832	aldehyde catabolic process; alkane biosynthetic process; cuticle development; defense response to bacterium; defense response to fungus; response to water deprivation; wax biosynthetic process	GO:0005506 GO:0016491 GO:0071771	aldehyde decarbonylase activity; iron ion binding; oxidoreductase activity	NA	NA
Glyma.03G104300	Only JY93	down	AT1G06620	2-oxoglutarate (2OG) and Fe(II)-dependent oxygenase superfamily protein		GO:0009414 GO:0009611 GO:0009867 GO:0042538 GO:0055114	hyperosmotic salinity response; jasmonic acid mediated signaling pathway; oxidation-reduction process; response to water deprivation; response to wounding	GO:0016491 GO:0016706	oxidoreductase activity; oxidoreductase activity, acting on paired donors, with incorporation or reduction of molecular oxygen, 2-oxoglutarate as one donor, and incorporation of one atom each of oxygen into both donors	GO:0005737	cytoplasm
Glyma.03G104500	Only JY93	down	AT4G01070	UDP-Glycosyltransferase superfamily protein		GO:0006612 GO:0006805 GO:0008152 GO:0009611 GO:0009636 GO:0009651 GO:0009805 GO:0009963 GO:0010363 GO:0042178	coumarin biosynthetic process; metabolic process; positive regulation of flavonoid biosynthetic process; protein targeting to membrane; regulation of plant-type hypersensitive response; response to salt stress; response to toxic substance; response to wounding; xenobiotic catabolic process; xenobiotic metabolic process	GO:0008194 GO:0016757 GO:0016758 GO:0035251	UDP-glucosyltransferase activity; UDP-glycosyltransferase activity; transferase activity, transferring glycosyl groups; transferase activity, transferring hexosyl groups	GO:0005634	nucleus
Glyma.03G104700	Only K6	down	AT4G01070	UDP-Glycosyltransferase superfamily protein		GO:0006612 GO:0006805 GO:0008152 GO:0009611 GO:0009636 GO:0009651 GO:0009805 GO:0009963 GO:0010363 GO:0042178	coumarin biosynthetic process; metabolic process; positive regulation of flavonoid biosynthetic process; protein targeting to membrane; regulation of plant-type hypersensitive response; response to salt stress; response to toxic substance; response to wounding; xenobiotic catabolic process; xenobiotic metabolic process	GO:0008194 GO:0016757 GO:0016758 GO:0035251	UDP-glucosyltransferase activity; UDP-glycosyltransferase activity; transferase activity, transferring glycosyl groups; transferase activity, transferring hexosyl groups	GO:0005634	nucleus
Glyma.03G105000	Only K6	up	AT4G37850	basic helix-loop-helix (bHLH) DNA-binding superfamily protein	bHLH	GO:0006355	regulation of transcription, DNA-dependent	GO:0003677 GO:0003700	DNA binding; sequence-specific DNA binding transcription factor activity	GO:0005634	nucleus
Glyma.03G105400	Only K6	down	AT2G44670	Protein of unknown function (DUF581)		GO:0008150	biological process	GO:0003674	molecular function	GO:0005575	cellular component
Glyma.03G105700	Only K6	down	AT4G37850	basic helix-loop-helix (bHLH) DNA-binding superfamily protein	bHLH	GO:0006355	regulation of transcription, DNA-dependent	GO:0003677 GO:0003700	DNA binding; sequence-specific DNA binding transcription factor activity	GO:0005634	nucleus
Glyma.03G106000	Only K6	up	AT4G36950	mitogen-activated protein kinase kinase kinase 21		GO:0006468	protein phosphorylation	GO:0004672 GO:0004674 GO:0005524 GO:0016772	ATP binding; protein kinase activity; protein serine/threonine kinase activity; transferase activity, transferring phosphorus-containing groups	GO:0005886	plasma membrane
Glyma.03G106900	Only JY93	up	AT4G17080	Histone H3 K4-specific methyltransferase SET7/9 family protein		GO:0008150	biological process	GO:0003674	molecular function	GO:0005737	cytoplasm
Glyma.03G107900	Only JY93	up	NA	NA		NA	NA	NA	NA	NA	NA
Glyma.03G109300	Only K6	down	AT4G16970	Protein kinase superfamily protein		GO:0006468 GO:0045727 GO:0046777	positive regulation of translation; protein autophosphorylation; protein phosphorylation	GO:0004672 GO:0004674 GO:0005524 GO:0016301 GO:0016772	ATP binding; kinase activity; protein kinase activity; protein serine/threonine kinase activity; transferase activity, transferring phosphorus-containing groups	GO:0005634	nucleus
Glyma.03G109900	Only JY93	up	AT2G32300	uclacyanin 1		GO:0048765 GO:0048767	root hair cell differentiation; root hair elongation	GO:0005507 GO:0009055	copper ion binding; electron carrier activity	GO:0005886 GO:0031225	anchored to membrane; plasma membrane
Glyma.03G111700	Only K6	up	AT2G44840	ethylene-responsive element binding factor 13	ERF	GO:0002679 GO:0006355 GO:0006612 GO:0007165 GO:0009414 GO:0009723 GO:0009733 GO:0009737 GO:0009738 GO:0009753 GO:0009863 GO:0009867 GO:0009873 GO:0010200 GO:0010363 GO:0035556 GO:0042538 GO:0043069	abscisic acid mediated signaling pathway; ethylene mediated signaling pathway; hyperosmotic salinity response; intracellular signal transduction; jasmonic acid mediated signaling pathway; negative regulation of programmed cell death; protein targeting to membrane; regulation of plant-type hypersensitive response; regulation of transcription, DNA-dependent; respiratory burst involved in defense re…	GO:0003677 GO:0003700	DNA binding; sequence-specific DNA binding transcription factor activity	GO:0005634	nucleus
Glyma.03G112000	Only K6	up	AT2G44840	ethylene-responsive element binding factor 13	ERF	GO:0002679 GO:0006355 GO:0006612 GO:0007165 GO:0009414 GO:0009723 GO:0009733 GO:0009737 GO:0009738 GO:0009753 GO:0009863 GO:0009867 GO:0009873 GO:0010200 GO:0010363 GO:0035556 GO:0042538 GO:0043069	abscisic acid mediated signaling pathway; ethylene mediated signaling pathway; hyperosmotic salinity response; intracellular signal transduction; jasmonic acid mediated signaling pathway; negative regulation of programmed cell death; protein targeting to membrane; regulation of plant-type hypersensitive response; regulation of transcription, DNA-dependent; respiratory burst involved in defense re…	GO:0003677 GO:0003700	DNA binding; sequence-specific DNA binding transcription factor activity	GO:0005634	nucleus
Glyma.03G112700	Only K6	up	AT2G44840	ethylene-responsive element binding factor 13	ERF	GO:0002679 GO:0006355 GO:0006612 GO:0007165 GO:0009414 GO:0009723 GO:0009733 GO:0009737 GO:0009738 GO:0009753 GO:0009863 GO:0009867 GO:0009873 GO:0010200 GO:0010363 GO:0035556 GO:0042538 GO:0043069	abscisic acid mediated signaling pathway; ethylene mediated signaling pathway; hyperosmotic salinity response; intracellular signal transduction; jasmonic acid mediated signaling pathway; negative regulation of programmed cell death; protein targeting to membrane; regulation of plant-type hypersensitive response; regulation of transcription, DNA-dependent; respiratory burst involved in defense re…	GO:0003677 GO:0003700	DNA binding; sequence-specific DNA binding transcription factor activity	GO:0005634	nucleus
Glyma.03G112800	Only K6	up	AT2G44840	ethylene-responsive element binding factor 13	ERF	GO:0002679 GO:0006355 GO:0006612 GO:0007165 GO:0009414 GO:0009723 GO:0009733 GO:0009737 GO:0009738 GO:0009753 GO:0009863 GO:0009867 GO:0009873 GO:0010200 GO:0010363 GO:0035556 GO:0042538 GO:0043069	abscisic acid mediated signaling pathway; ethylene mediated signaling pathway; hyperosmotic salinity response; intracellular signal transduction; jasmonic acid mediated signaling pathway; negative regulation of programmed cell death; protein targeting to membrane; regulation of plant-type hypersensitive response; regulation of transcription, DNA-dependent; respiratory burst involved in defense re…	GO:0003677 GO:0003700	DNA binding; sequence-specific DNA binding transcription factor activity	GO:0005634	nucleus
Glyma.03G114900	Only K6	up	AT2G44930	Plant protein of unknown function (DUF247)		GO:0008150	biological process	GO:0003674	molecular function	GO:0005886	plasma membrane
Glyma.03G117500	Only K6	up	AT1G02065	squamosa promoter binding protein-like 8	SBP	GO:0009554 GO:0009556 GO:0048653	anther development; megasporogenesis; microsporogenesis	GO:0003677	DNA binding	GO:0005634	nucleus
Glyma.03G117600	Only JY93	up	AT1G27360	squamosa promoter-like 11	SBP	GO:0006355 GO:0048510	regulation of timing of transition from vegetative to reproductive phase; regulation of transcription, DNA-dependent	GO:0003677 GO:0003700	DNA binding; sequence-specific DNA binding transcription factor activity	GO:0005634	nucleus
Glyma.03G120200	Only JY93	up	AT1G68070	Zinc finger, C3HC4 type (RING finger) family protein		GO:0006661	phosphatidylinositol biosynthetic process	GO:0008270	zinc ion binding	GO:0005774	vacuolar membrane
Glyma.03G120700	Only K6	up	AT2G41010	calmodulin (CAM)-binding protein of 25 kDa		GO:0009414 GO:0009651 GO:0010337	regulation of salicylic acid metabolic process; response to salt stress; response to water deprivation	GO:0005516	calmodulin binding	GO:0005634	nucleus
Glyma.03G121500	Only K6	up	AT1G78955	camelliol C synthase 1		NA	NA	GO:0042300 GO:0090438	beta-amyrin synthase activity; camelliol C synthase activity	NA	NA
Glyma.03G121600	Only K6	up	AT1G78960	lupeol synthase 2		GO:0016104 GO:0016126 GO:0019745	pentacyclic triterpenoid biosynthetic process; sterol biosynthetic process; triterpenoid biosynthetic process	GO:0003824 GO:0016866 GO:0042299 GO:0042300	beta-amyrin synthase activity; catalytic activity; intramolecular transferase activity; lupeol synthase activity	GO:0005634	nucleus
Glyma.03G122000	Only JY93	up	AT2G40890	cytochrome P450, family 98, subfamily A, polypeptide 3		GO:0009611 GO:0009699 GO:0009805 GO:0009809 GO:0009813 GO:0009963 GO:0055114	coumarin biosynthetic process; flavonoid biosynthetic process; lignin biosynthetic process; oxidation-reduction process; phenylpropanoid biosynthetic process; positive regulation of flavonoid biosynthetic process; response to wounding	GO:0004497 GO:0005515 GO:0042802 GO:0046409	identical protein binding; monooxygenase activity; p-coumarate 3-hydroxylase activity; protein binding	GO:0005739 GO:0005783 GO:0005886 GO:0043231	endoplasmic reticulum; intracellular membrane-bounded organelle; mitochondrion; plasma membrane
Glyma.03G123200	Only K6	up	AT2G40950	Basic-leucine zipper (bZIP) transcription factor family protein	bZIP	GO:0006355 GO:0042538 GO:0045893	hyperosmotic salinity response; positive regulation of transcription, DNA-dependent; regulation of transcription, DNA-dependent	GO:0003677 GO:0003700 GO:0043565 GO:0046983	DNA binding; protein dimerization activity; sequence-specific DNA binding; sequence-specific DNA binding transcription factor activity	GO:0005634 GO:0005783	endoplasmic reticulum; nucleus
Glyma.03G130600	Only JY93	down	AT3G56970	basic helix-loop-helix (bHLH) DNA-binding superfamily protein	bHLH	GO:0006355 GO:0010106 GO:0055072	cellular response to iron ion starvation; iron ion homeostasis; regulation of transcription, DNA-dependent	GO:0003677 GO:0003700 GO:0005515	DNA binding; protein binding; sequence-specific DNA binding transcription factor activity	GO:0005634	nucleus
Glyma.03G130700	Only JY93	up	NA	NA		NA	NA	NA	NA	NA	NA
Glyma.03G130900	Only K6	up	AT5G04040	Patatin-like phospholipase family protein		GO:0006629 GO:0006635 GO:0008152 GO:0016558 GO:0019433 GO:0044265	cellular macromolecule catabolic process; fatty acid beta-oxidation; lipid metabolic process; metabolic process; protein import into peroxisome matrix; triglyceride catabolic process	GO:0004806 GO:0005525	GTP binding; triglyceride lipase activity	GO:0012511	monolayer-surrounded lipid storage body
Glyma.03G131000	Only K6	up	AT5G04020	calmodulin binding		GO:0008150	biological process	GO:0005516	calmodulin binding	GO:0005634 GO:0005886	nucleus; plasma membrane
Glyma.03G131100	Only JY93	down	AT4G33030	sulfoquinovosyldiacylglycerol 1		GO:0009247 GO:0016036 GO:0019375 GO:0044237 GO:0046506	cellular metabolic process; cellular response to phosphate starvation; galactolipid biosynthetic process; glycolipid biosynthetic process; sulfolipid biosynthetic process	GO:0000166 GO:0003824 GO:0008146 GO:0008270 GO:0046507 GO:0050662	UDPsulfoquinovose synthase activity; catalytic activity; coenzyme binding; nucleotide binding; sulfotransferase activity; zinc ion binding	GO:0009507	chloroplast
Glyma.03G131600	Only JY93	up	NA	NA		NA	NA	NA	NA	NA	NA
Glyma.03G131900	Only K6	up	AT2G41430	dehydration-induced protein (ERD15)		GO:0006096 GO:0006833 GO:0006972 GO:0007030 GO:0009266 GO:0009414 GO:0009617 GO:0009644 GO:0009646 GO:0009651 GO:0032880 GO:0042744 GO:0046686	Golgi organization; glycolysis; hydrogen peroxide catabolic process; hyperosmotic response; regulation of protein localization; response to absence of light; response to bacterium; response to cadmium ion; response to high light intensity; response to salt stress; response to temperature stimulus; response to water deprivation; water transport	GO:0005515	protein binding	GO:0005737	cytoplasm
Glyma.03G134700	Only JY93	up	AT5G41560	NA		GO:0008150	biological process	GO:0003674	molecular function	GO:0005634	nucleus
Glyma.03G134800	Only K6	up	AT2G41640	Glycosyltransferase family 61 protein		GO:0010200	response to chitin	GO:0016757	transferase activity, transferring glycosyl groups	GO:0005576	extracellular region
Glyma.03G137900	Only JY93	up	AT3G57520	seed imbibition 2		GO:0006979 GO:0034484 GO:0080167	raffinose catabolic process; response to karrikin; response to oxidative stress	GO:0004553 GO:0052692	hydrolase activity, hydrolyzing O-glycosyl compounds; raffinose alpha-galactosidase activity	GO:0005737 GO:0009506	cytoplasm; plasmodesma
Glyma.03G138000	Only K6	up	AT3G57530	calcium-dependent protein kinase 32		GO:0000165 GO:0006468 GO:0006499 GO:0006612 GO:0007154 GO:0007165 GO:0009409 GO:0009414 GO:0009611 GO:0009651 GO:0009723 GO:0009733 GO:0009737 GO:0009738 GO:0009753 GO:0009862 GO:0009863 GO:0009867 GO:0009963 GO:0010200 GO:0010363 GO:0030968 GO:0031348 GO:0035556 GO:0042538 GO:0043069 GO:0050832	MAPK cascade; N-terminal protein myristoylation; abscisic acid mediated signaling pathway; cell communication; defense response to fungus; endoplasmic reticulum unfolded protein response; hyperosmotic salinity response; intracellular signal transduction; jasmonic acid mediated signaling pathway; negative regulation of defense response; negative regulation of programmed cell death; positive regula…	GO:0004672 GO:0004674 GO:0004683 GO:0004698 GO:0004713 GO:0005509 GO:0005515 GO:0005524 GO:0016301 GO:0016772	ATP binding; calcium-dependent protein kinase C activity; calcium ion binding; calmodulin-dependent protein kinase activity; kinase activity; protein binding; protein kinase activity; protein serine/threonine kinase activity; protein tyrosine kinase activity; transferase activity, transferring phosphorus-containing groups	GO:0005634 GO:0005737 GO:0005886 GO:0009506	cytoplasm; nucleus; plasma membrane; plasmodesma
Glyma.03G138600	Only K6	up	AT2G41900	CCCH-type zinc finger protein with ARM repeat domain	C3H	GO:0006355 GO:0006486	protein glycosylation; regulation of transcription, DNA-dependent	GO:0003676 GO:0003700 GO:0008270	nucleic acid binding; sequence-specific DNA binding transcription factor activity; zinc ion binding	GO:0005634 GO:0005737	cytoplasm; nucleus
Glyma.03G139500	Only JY93	up	AT3G52110	NA		GO:0000226 GO:0000911 GO:0008150	biological process; cytokinesis by cell plate formation; microtubule cytoskeleton organization	GO:0003674	molecular function	GO:0005634	nucleus
Glyma.03G140900	Only JY93	up	AT2G42320	nucleolar protein gar2-related		GO:0008150 GO:0019344	biological process; cysteine biosynthetic process	GO:0003674	molecular function	GO:0005634	nucleus
Glyma.03G142800	Only JY93	down	AT2G42220	Rhodanese/Cell cycle control phosphatase superfamily protein		GO:0008150 GO:0010103 GO:0019344 GO:0019684	biological process; cysteine biosynthetic process; photosynthesis, light reaction; stomatal complex morphogenesis	GO:0003674	molecular function	GO:0009507 GO:0009534 GO:0009535	chloroplast; chloroplast thylakoid; chloroplast thylakoid membrane
Glyma.03G143500	Only JY93	down	AT5G06800	myb-like HTH transcriptional regulator family protein	G2-like	GO:0006355	regulation of transcription, DNA-dependent	GO:0003700	sequence-specific DNA binding transcription factor activity	GO:0005634	nucleus
Glyma.03G143600	Only JY93	down	AT5G06800	myb-like HTH transcriptional regulator family protein	G2-like	GO:0006355	regulation of transcription, DNA-dependent	GO:0003700	sequence-specific DNA binding transcription factor activity	GO:0005634	nucleus
Glyma.03G143700	Only JY93	up	AT5G06900	cytochrome P450, family 93, subfamily D, polypeptide 1		GO:0055114	oxidation-reduction process	GO:0005506 GO:0009055 GO:0016705 GO:0019825 GO:0020037	electron carrier activity; heme binding; iron ion binding; oxidoreductase activity, acting on paired donors, with incorporation or reduction of molecular oxygen; oxygen binding	NA	NA
Glyma.03G144500	Only K6	up	AT3G12120	fatty acid desaturase 2		GO:0006629 GO:0055114	lipid metabolic process; oxidation-reduction process	GO:0016717 GO:0016720 GO:0045485	delta12-fatty acid dehydrogenase activity; omega-6 fatty acid desaturase activity; oxidoreductase activity, acting on paired donors, with oxidation of a pair of donors resulting in the reduction of molecular oxygen to two molecules of water	GO:0005634 GO:0005783	endoplasmic reticulum; nucleus
Glyma.03G146000	Only JY93	down	AT5G06690	WCRKC thioredoxin 1		GO:0006662 GO:0045454	cell redox homeostasis; glycerol ether metabolic process	GO:0009055 GO:0015035	electron carrier activity; protein disulfide oxidoreductase activity	GO:0009507 GO:0009570	chloroplast; chloroplast stroma
Glyma.03G147700	Only JY93	up	AT5G42500	Disease resistance-responsive (dirigent-like protein) family protein		GO:0006952	defense response	GO:0003674	molecular function	GO:0005576	extracellular region
Glyma.03G149400	Only K6	up	AT5G13320	jasmonic acid-amino synthetase		NA	NA	NA	NA	GO:0005737	cytoplasm
Glyma.03G149900	Only K6	down	AT4G02940	oxidoreductase, 2OG-Fe(II) oxygenase family protein		GO:0055114 GO:0080167	oxidation-reduction process; response to karrikin	GO:0016491 GO:0016706	oxidoreductase activity; oxidoreductase activity, acting on paired donors, with incorporation or reduction of molecular oxygen, 2-oxoglutarate as one donor, and incorporation of one atom each of oxygen into both donors	NA	NA
Glyma.03G150400	Only K6	up	NA	NA		NA	NA	NA	NA	NA	NA
Glyma.03G150500	Only K6	up	NA	NA		NA	NA	NA	NA	NA	NA
Glyma.03G151500	Only JY93	down	AT2G48150	glutathione peroxidase 4		GO:0006499 GO:0006979 GO:0009407 GO:0009688 GO:0009827 GO:0009860 GO:0055114	N-terminal protein myristoylation; abscisic acid biosynthetic process; oxidation-reduction process; plant-type cell wall modification; pollen tube growth; response to oxidative stress; toxin catabolic process	GO:0004602	glutathione peroxidase activity	GO:0005739 GO:0005829	cytosol; mitochondrion
Glyma.03G152700	Only K6	down	AT5G46610	Aluminium activated malate transporter family protein		GO:0010044	response to aluminum ion	GO:0003674	molecular function	GO:0005886	plasma membrane
Glyma.03G155800	Only JY93	down	AT3G63210	Protein of unknown function (DUF581)		GO:0009737 GO:0010162	response to abscisic acid stimulus; seed dormancy process	GO:0003674	molecular function	GO:0005634	nucleus
Glyma.03G158200	Only JY93	down	AT3G51510	NA		GO:0000023 GO:0008150 GO:0019252 GO:0043085	biological process; maltose metabolic process; positive regulation of catalytic activity; starch biosynthetic process	GO:0003674	molecular function	GO:0009507 GO:0009535	chloroplast; chloroplast thylakoid membrane
Glyma.03G158600	Only K6	down	AT5G43700	AUX/IAA transcriptional regulator family protein		GO:0006355 GO:0006417 GO:0007020 GO:0009733 GO:0009736 GO:0010583	cytokinin mediated signaling pathway; microtubule nucleation; regulation of transcription, DNA-dependent; regulation of translation; response to auxin stimulus; response to cyclopentenone	GO:0003677 GO:0003700 GO:0046983	DNA binding; protein dimerization activity; sequence-specific DNA binding transcription factor activity	GO:0005622 GO:0005634	intracellular; nucleus
Glyma.03G160100	Only K6	up	AT5G63450	cytochrome P450, family 94, subfamily B, polypeptide 1		GO:0009611 GO:0009694 GO:0009753 GO:0055114	jasmonic acid metabolic process; oxidation-reduction process; response to jasmonic acid stimulus; response to wounding	GO:0005506 GO:0009055 GO:0016705 GO:0019825 GO:0020037	electron carrier activity; heme binding; iron ion binding; oxidoreductase activity, acting on paired donors, with incorporation or reduction of molecular oxygen; oxygen binding	GO:0009507	chloroplast
Glyma.03G161700	Only K6	up	NA	NA		NA	NA	NA	NA	NA	NA
Glyma.03G163100	Only K6	up	AT2G31180	myb domain protein 14	MYB	GO:0006355 GO:0009651 GO:0009723 GO:0009733 GO:0009751 GO:0009753	regulation of transcription, DNA-dependent; response to auxin stimulus; response to ethylene stimulus; response to jasmonic acid stimulus; response to salicylic acid stimulus; response to salt stress	GO:0003677 GO:0003700	DNA binding; sequence-specific DNA binding transcription factor activity	GO:0005634	nucleus
Glyma.03G164000	Only K6	down	AT2G31160	Protein of unknown function (DUF640)		GO:0007389 GO:0008150 GO:0009855 GO:0009944 GO:0010014 GO:0010075 GO:0048438 GO:0048439	biological process; determination of bilateral symmetry; floral whorl development; flower morphogenesis; meristem initiation; pattern specification process; polarity specification of adaxial/abaxial axis; regulation of meristem growth	GO:0003674	molecular function	GO:0005634	nucleus
Glyma.03G164200	Only JY93	down	AT4G28530	NAC domain containing protein 74	NAC	GO:0006355 GO:0007275	multicellular organismal development; regulation of transcription, DNA-dependent	GO:0003677 GO:0003700	DNA binding; sequence-specific DNA binding transcription factor activity	GO:0005634	nucleus
Glyma.03G166500	Only JY93	up	AT1G04040	HAD superfamily, subfamily IIIB acid phosphatase		GO:0000271 GO:0009825 GO:0009832 GO:0009932 GO:0010817 GO:0016049 GO:0030243 GO:0043481 GO:0048767 GO:0071555	anthocyanin accumulation in tissues in response to UV light; cell growth; cell tip growth; cell wall organization; cellulose metabolic process; multidimensional cell growth; plant-type cell wall biogenesis; polysaccharide biosynthetic process; regulation of hormone levels; root hair elongation	GO:0003993	acid phosphatase activity	GO:0005618 GO:0005773 GO:0005774 GO:0009505 GO:0009506	cell wall; plant-type cell wall; plasmodesma; vacuolar membrane; vacuole
Glyma.03G166900	Only K6	up	AT5G43980	plasmodesmata-located protein 1		GO:0010497 GO:0046739	plasmodesmata-mediated intercellular transport; spread of virus in multicellular host	NA	NA	GO:0005576 GO:0009505 GO:0009506	extracellular region; plant-type cell wall; plasmodesma
Glyma.03G167800	Only JY93	up	AT1G04120	multidrug resistance-associated protein 5		GO:0000226 GO:0000911 GO:0006810 GO:0006888 GO:0009651 GO:0030007 GO:0043090 GO:0055085	ER to Golgi vesicle-mediated transport; amino acid import; cellular potassium ion homeostasis; cytokinesis by cell plate formation; microtubule cytoskeleton organization; response to salt stress; transmembrane transport; transport	GO:0000166 GO:0005524 GO:0008281 GO:0016887 GO:0017111 GO:0042626	ATP binding; ATPase activity; ATPase activity, coupled to transmembrane movement of substances; nucleoside-triphosphatase activity; nucleotide binding; sulfonylurea receptor activity	GO:0000325 GO:0005773 GO:0005774 GO:0005886	plant-type vacuole; plasma membrane; vacuolar membrane; vacuole
Glyma.03G168000	Only JY93	up	AT1G15520	pleiotropic drug resistance 12		GO:0000165 GO:0006612 GO:0006855 GO:0007165 GO:0009414 GO:0009595 GO:0009697 GO:0009723 GO:0009733 GO:0009737 GO:0009738 GO:0009751 GO:0009753 GO:0009862 GO:0009867 GO:0010193 GO:0010200 GO:0010310 GO:0010363 GO:0015692 GO:0031348 GO:0042538 GO:0042742 GO:0043069 GO:0043900 GO:0046865 GO:0050832 GO:0080168	MAPK cascade; abscisic acid mediated signaling pathway; abscisic acid transport; defense response to bacterium; defense response to fungus; detection of biotic stimulus; drug transmembrane transport; hyperosmotic salinity response; jasmonic acid mediated signaling pathway; lead ion transport; negative regulation of defense response; negative regulation of programmed cell death; protein targeting …	GO:0000166 GO:0005524 GO:0016887 GO:0017111 GO:0042626	ATP binding; ATPase activity; ATPase activity, coupled to transmembrane movement of substances; nucleoside-triphosphatase activity; nucleotide binding	GO:0005886	plasma membrane
Glyma.03G168800	Only JY93	down	AT1G61040	plus-3 domain-containing protein		GO:0000398 GO:0006352 GO:0006355 GO:0008284 GO:0009630 GO:0009910 GO:0016570 GO:0030244 GO:0030422 GO:0035196 GO:0043687 GO:0045893 GO:0048193 GO:0048573 GO:0051276	DNA-dependent transcription, initiation; Golgi vesicle transport; cellulose biosynthetic process; chromosome organization; gravitropism; histone modification; mRNA splicing, via spliceosome; negative regulation of flower development; photoperiodism, flowering; positive regulation of cell proliferation; positive regulation of transcription, DNA-dependent; post-translational protein modification; p…	GO:0003677	DNA binding	GO:0005634	nucleus
Glyma.03G170300	Only K6	down	AT2G20180	phytochrome interacting factor 3-like 5	bHLH	GO:0006355 GO:0006783 GO:0009686 GO:0009740 GO:0009845 GO:0009959 GO:0010029 GO:0010099 GO:0010100 GO:0010161 GO:0010187 GO:0015995 GO:0048608	chlorophyll biosynthetic process; gibberellic acid mediated signaling pathway; gibberellin biosynthetic process; heme biosynthetic process; negative gravitropism; negative regulation of photomorphogenesis; negative regulation of seed germination; red light signaling pathway; regulation of photomorphogenesis; regulation of seed germination; regulation of transcription, DNA-dependent; reproductive …	GO:0003677 GO:0003700 GO:0005515 GO:0010313 GO:0042802	DNA binding; identical protein binding; phytochrome binding; protein binding; sequence-specific DNA binding transcription factor activity	GO:0005634	nucleus
Glyma.03G171500	Only JY93	up	AT3G53720	cation/H+ exchanger 20		GO:0006623 GO:0006812 GO:0006885 GO:0030007 GO:0030104 GO:0035725 GO:0055085	cation transport; cellular potassium ion homeostasis; protein targeting to vacuole; regulation of pH; sodium ion transmembrane transport; transmembrane transport; water homeostasis	GO:0005451 GO:0015299 GO:0015385	monovalent cation:hydrogen antiporter activity; sodium:hydrogen antiporter activity; solute:hydrogen antiporter activity	GO:0005783 GO:0009507 GO:0012505 GO:0016021	chloroplast; endomembrane system; endoplasmic reticulum; integral to membrane
Glyma.03G172300	Only JY93	up	AT2G37510	RNA-binding (RRM/RBD/RNP motifs) family protein		GO:0008150	biological process	GO:0000166 GO:0003676 GO:0003723	RNA binding; nucleic acid binding; nucleotide binding	NA	NA
Glyma.03G172900	Only JY93	down	AT2G37460	nodulin MtN21 /EamA-like transporter family protein		GO:0019761	glucosinolate biosynthetic process	NA	NA	GO:0005737 GO:0016020	cytoplasm; membrane
Glyma.03G173300	Only K6	up	AT2G37430	C2H2 and C2HC zinc fingers superfamily protein	C2H2	GO:0002679 GO:0006355 GO:0009693 GO:0010200 GO:0035556	ethylene biosynthetic process; intracellular signal transduction; regulation of transcription, DNA-dependent; respiratory burst involved in defense response; response to chitin	GO:0003676 GO:0003700 GO:0008270	nucleic acid binding; sequence-specific DNA binding transcription factor activity; zinc ion binding	GO:0005634	nucleus
Glyma.03G176600	Only JY93	up	AT2G37260	WRKY family transcription factor family protein	WRKY	GO:0001708 GO:0006355 GO:0009957 GO:0010214	cell fate specification; epidermal cell fate specification; regulation of transcription, DNA-dependent; seed coat development	GO:0003700 GO:0043565	sequence-specific DNA binding; sequence-specific DNA binding transcription factor activity	GO:0005634	nucleus
Glyma.03G177500	Only K6	down	AT2G28550	related to AP2.7	AP2	GO:0006355 GO:0009651 GO:0009737 GO:0009887 GO:0010228	organ morphogenesis; regulation of transcription, DNA-dependent; response to abscisic acid stimulus; response to salt stress; vegetative to reproductive phase transition of meristem	GO:0003677 GO:0003700	DNA binding; sequence-specific DNA binding transcription factor activity	GO:0005634	nucleus
Glyma.03G179300	Only JY93	up	AT2G37150	RING/U-box superfamily protein		GO:0010260	organ senescence	GO:0008270	zinc ion binding	GO:0005634	nucleus
Glyma.03G180000	Only K6	down	AT5G03170	FASCICLIN-like arabinogalactan-protein 11		GO:0009834	secondary cell wall biogenesis	NA	NA	GO:0005886 GO:0031225	anchored to membrane; plasma membrane
Glyma.03G181300	Only K6	down	AT2G37210	lysine decarboxylase family protein		GO:0008150	biological process	GO:0003674	molecular function	GO:0005634 GO:0005829	cytosol; nucleus
Glyma.03G181600	Only JY93	up	AT2G37040	PHE ammonia lyase 1		GO:0006559 GO:0006598 GO:0006952 GO:0006979 GO:0009058 GO:0009555 GO:0009611 GO:0009698 GO:0009699 GO:0009805 GO:0009819 GO:0009963 GO:0010224 GO:0042398 GO:0046244 GO:0046274 GO:0080167	L-phenylalanine catabolic process; biosynthetic process; cellular modified amino acid biosynthetic process; coumarin biosynthetic process; defense response; drought recovery; lignin catabolic process; phenylpropanoid biosynthetic process; phenylpropanoid metabolic process; pollen development; polyamine catabolic process; positive regulation of flavonoid biosynthetic process; response to UV-B; res…	GO:0003824 GO:0016841 GO:0045548	ammonia-lyase activity; catalytic activity; phenylalanine ammonia-lyase activity	GO:0005737	cytoplasm
Glyma.03G181700	Only JY93	up	AT2G37040	PHE ammonia lyase 1		GO:0006559 GO:0006598 GO:0006952 GO:0006979 GO:0009058 GO:0009555 GO:0009611 GO:0009698 GO:0009699 GO:0009805 GO:0009819 GO:0009963 GO:0010224 GO:0042398 GO:0046244 GO:0046274 GO:0080167	L-phenylalanine catabolic process; biosynthetic process; cellular modified amino acid biosynthetic process; coumarin biosynthetic process; defense response; drought recovery; lignin catabolic process; phenylpropanoid biosynthetic process; phenylpropanoid metabolic process; pollen development; polyamine catabolic process; positive regulation of flavonoid biosynthetic process; response to UV-B; res…	GO:0003824 GO:0016841 GO:0045548	ammonia-lyase activity; catalytic activity; phenylalanine ammonia-lyase activity	GO:0005737	cytoplasm
Glyma.03G182400	Only K6	up	AT3G09830	Protein kinase superfamily protein		GO:0006468 GO:0006612 GO:0006944 GO:0009627 GO:0009693 GO:0009697 GO:0010363 GO:0031347 GO:0043069	cellular membrane fusion; ethylene biosynthetic process; negative regulation of programmed cell death; protein phosphorylation; protein targeting to membrane; regulation of defense response; regulation of plant-type hypersensitive response; salicylic acid biosynthetic process; systemic acquired resistance	GO:0004672 GO:0005524 GO:0016301 GO:0016772	ATP binding; kinase activity; protein kinase activity; transferase activity, transferring phosphorus-containing groups	GO:0005886	plasma membrane
Glyma.03G182700	Only K6	up	AT2G36985	DVL family protein		GO:0042127 GO:0048367	regulation of cell proliferation; shoot system development	GO:0003674	molecular function	GO:0005886	plasma membrane
Glyma.03G184000	Only K6	down	AT2G36880	methionine adenosyltransferase 3		GO:0006556 GO:0006598 GO:0006816 GO:0006970 GO:0007030 GO:0009651 GO:0009698 GO:0042398 GO:0046686	Golgi organization; S-adenosylmethionine biosynthetic process; calcium ion transport; cellular modified amino acid biosynthetic process; phenylpropanoid metabolic process; polyamine catabolic process; response to cadmium ion; response to osmotic stress; response to salt stress	GO:0004478 GO:0005507 GO:0005524	ATP binding; copper ion binding; methionine adenosyltransferase activity	GO:0005737 GO:0005829 GO:0005886 GO:0009506	cytoplasm; cytosol; plasma membrane; plasmodesma
Glyma.03G185900	Only JY93	up	AT2G36830	gamma tonoplast intrinsic protein		GO:0006096 GO:0006598 GO:0006810 GO:0006816 GO:0006833 GO:0006972 GO:0007030 GO:0009266 GO:0009269 GO:0009409 GO:0009651 GO:0009698 GO:0009737 GO:0009740 GO:0015840 GO:0042398 GO:0046686 GO:0055085 GO:0080170	Golgi organization; calcium ion transport; cellular modified amino acid biosynthetic process; gibberellic acid mediated signaling pathway; glycolysis; hydrogen peroxide transmembrane transport; hyperosmotic response; phenylpropanoid metabolic process; polyamine catabolic process; response to abscisic acid stimulus; response to cadmium ion; response to cold; response to desiccation; response to sa…	GO:0005215 GO:0015204 GO:0015250	transporter activity; urea transmembrane transporter activity; water channel activity	GO:0000326 GO:0005737 GO:0005773 GO:0005774 GO:0009705 GO:0009941 GO:0016020 GO:0016021 GO:0042807	central vacuole; chloroplast envelope; cytoplasm; integral to membrane; membrane; plant-type vacuole membrane; protein storage vacuole; vacuolar membrane; vacuole
Glyma.03G189100	Only JY93	down	AT5G03795	Exostosin family protein		NA	NA	NA	NA	GO:0005794 GO:0016020	Golgi apparatus; membrane
Glyma.03G191700	Only K6	up	AT5G03680	Duplicated homeodomain-like superfamily protein	Trihelix	GO:0006355 GO:0007389 GO:0009855 GO:0009887 GO:0009909 GO:0009944 GO:0010014 GO:0010051 GO:0010075 GO:0010200 GO:0046621 GO:0048438 GO:0048439 GO:0048441 GO:0048442 GO:0048451 GO:0048453 GO:0048498 GO:0048519 GO:0090428	determination of bilateral symmetry; establishment of petal orientation; floral whorl development; flower morphogenesis; meristem initiation; negative regulation of biological process; negative regulation of organ growth; organ morphogenesis; pattern specification process; perianth development; petal development; petal formation; polarity specification of adaxial/abaxial axis; regulation of flowe…	GO:0003677 GO:0003700	DNA binding; sequence-specific DNA binding transcription factor activity	GO:0005634	nucleus
Glyma.03G192000	Only K6	down	AT5G03670	NA		GO:0008150 GO:0009888 GO:0030154	biological process; cell differentiation; tissue development	GO:0003674	molecular function	GO:0005634	nucleus
Glyma.03G192100	Only JY93	down	AT2G36410	Family of unknown function (DUF662) _x0001_		GO:0007020	microtubule nucleation	NA	NA	GO:0005634 GO:0005886	nucleus; plasma membrane
Glyma.03G192600	Only JY93	down	AT2G36380	pleiotropic drug resistance 6		NA	NA	GO:0000166 GO:0005524 GO:0016887 GO:0017111 GO:0042626	ATP binding; ATPase activity; ATPase activity, coupled to transmembrane movement of substances; nucleoside-triphosphatase activity; nucleotide binding	GO:0005886 GO:0016020	membrane; plasma membrane
Glyma.03G194000	Only K6	up	AT2G36320	A20/AN1-like zinc finger family protein		GO:0008150	biological process	GO:0003677 GO:0008270	DNA binding; zinc ion binding	GO:0005634	nucleus
Glyma.03G194300	Only K6	up	AT3G52770	protein binding		GO:0006914 GO:0009062 GO:0009943 GO:0010073 GO:0010075 GO:0010305 GO:0010358 GO:0043433	adaxial/abaxial axis specification; autophagy; fatty acid catabolic process; leaf shaping; leaf vascular tissue pattern formation; meristem maintenance; negative regulation of sequence-specific DNA binding transcription factor activity; regulation of meristem growth	GO:0005515	protein binding	GO:0005634	nucleus
Glyma.03G195600	Only K6	up	AT3G27060	Ferritin/ribonucleotide reductase-like family protein		GO:0006260 GO:0006261 GO:0006281 GO:0007275 GO:0009165 GO:0009186 GO:0012501 GO:0051726 GO:0055114	DNA-dependent DNA replication; DNA repair; DNA replication; deoxyribonucleoside diphosphate metabolic process; multicellular organismal development; nucleotide biosynthetic process; oxidation-reduction process; programmed cell death; regulation of cell cycle	GO:0004748 GO:0016491 GO:0046914	oxidoreductase activity; ribonucleoside-diphosphate reductase activity, thioredoxin disulfide as acceptor; transition metal ion binding	GO:0005737	cytoplasm
Glyma.03G197900	Only K6	up	AT5G22380	NAC domain containing protein 90	NAC	GO:0006355 GO:0007275	multicellular organismal development; regulation of transcription, DNA-dependent	GO:0003677 GO:0003700	DNA binding; sequence-specific DNA binding transcription factor activity	GO:0005634	nucleus
Glyma.03G199000	Only K6	down	AT2G36080	AP2/B3-like transcriptional factor family protein	B3	GO:0006355 GO:0009062 GO:0045892 GO:0080167	fatty acid catabolic process; negative regulation of transcription, DNA-dependent; regulation of transcription, DNA-dependent; response to karrikin	GO:0003677 GO:0003700	DNA binding; sequence-specific DNA binding transcription factor activity	GO:0005634	nucleus
Glyma.03G199100	Only JY93	down	AT2G24280	alpha/beta-Hydrolases superfamily protein		GO:0006508 GO:0019761	glucosinolate biosynthetic process; proteolysis	GO:0004185 GO:0008236	serine-type carboxypeptidase activity; serine-type peptidase activity	GO:0005764 GO:0009507	chloroplast; lysosome
Glyma.03G200900	Only K6	down	AT3G52500	Eukaryotic aspartyl protease family protein		GO:0000271 GO:0006508 GO:0006546	glycine catabolic process; polysaccharide biosynthetic process; proteolysis	GO:0004190	aspartic-type endopeptidase activity	GO:0005576 GO:0005618 GO:0009505 GO:0016020	cell wall; extracellular region; membrane; plant-type cell wall
Glyma.03G201000	Only K6	up	AT2G35980	Late embryogenesis abundant (LEA) hydroxyproline-rich glycoprotein family		GO:0000165 GO:0002679 GO:0006612 GO:0006944 GO:0009862 GO:0009867 GO:0010150 GO:0010200 GO:0010310 GO:0010363 GO:0031348 GO:0042742 GO:0043069 GO:0050832 GO:0051607 GO:0051707	MAPK cascade; cellular membrane fusion; defense response to bacterium; defense response to fungus; defense response to virus; jasmonic acid mediated signaling pathway; leaf senescence; negative regulation of defense response; negative regulation of programmed cell death; protein targeting to membrane; regulation of hydrogen peroxide metabolic process; regulation of plant-type hypersensitive respo…	GO:0003674	molecular function	GO:0005739 GO:0009507	chloroplast; mitochondrion
Glyma.03G201300	Only K6	up	AT2G35980	Late embryogenesis abundant (LEA) hydroxyproline-rich glycoprotein family		GO:0000165 GO:0002679 GO:0006612 GO:0006944 GO:0009862 GO:0009867 GO:0010150 GO:0010200 GO:0010310 GO:0010363 GO:0031348 GO:0042742 GO:0043069 GO:0050832 GO:0051607 GO:0051707	MAPK cascade; cellular membrane fusion; defense response to bacterium; defense response to fungus; defense response to virus; jasmonic acid mediated signaling pathway; leaf senescence; negative regulation of defense response; negative regulation of programmed cell death; protein targeting to membrane; regulation of hydrogen peroxide metabolic process; regulation of plant-type hypersensitive respo…	GO:0003674	molecular function	GO:0005739 GO:0009507	chloroplast; mitochondrion
Glyma.03G201500	Only K6	up	AT2G35980	Late embryogenesis abundant (LEA) hydroxyproline-rich glycoprotein family		GO:0000165 GO:0002679 GO:0006612 GO:0006944 GO:0009862 GO:0009867 GO:0010150 GO:0010200 GO:0010310 GO:0010363 GO:0031348 GO:0042742 GO:0043069 GO:0050832 GO:0051607 GO:0051707	MAPK cascade; cellular membrane fusion; defense response to bacterium; defense response to fungus; defense response to virus; jasmonic acid mediated signaling pathway; leaf senescence; negative regulation of defense response; negative regulation of programmed cell death; protein targeting to membrane; regulation of hydrogen peroxide metabolic process; regulation of plant-type hypersensitive respo…	GO:0003674	molecular function	GO:0005739 GO:0009507	chloroplast; mitochondrion
Glyma.03G202600	Only K6	up	AT3G52450	plant U-box 22		GO:0002679 GO:0006865 GO:0006952 GO:0009414 GO:0010200 GO:0015824 GO:0016567 GO:0051865	amino acid transport; defense response; proline transport; protein autoubiquitination; protein ubiquitination; respiratory burst involved in defense response; response to chitin; response to water deprivation	GO:0004842	ubiquitin-protein ligase activity	GO:0000151 GO:0005737 GO:0005829	cytoplasm; cytosol; ubiquitin ligase complex
Glyma.03G203600	Only K6	up	AT3G11760	NA		GO:0008150	biological process	GO:0003674	molecular function	GO:0005634	nucleus
Glyma.03G204900	Only K6	up	AT1G68450	VQ motif-containing protein		GO:0008150	biological process	GO:0003674	molecular function	GO:0005634	nucleus
Glyma.03G205400	Only K6	down	AT5G06570	alpha/beta-Hydrolases superfamily protein		GO:0006865 GO:0008152	amino acid transport; metabolic process	GO:0016787	hydrolase activity	GO:0005634	nucleus
Glyma.03G205900	Only K6	down	AT3G54720	Peptidase M28 family protein		GO:0006508 GO:0009640 GO:0009790 GO:0009908 GO:0009910 GO:0010305 GO:0048364 GO:0048507	embryo development; flower development; leaf vascular tissue pattern formation; meristem development; negative regulation of flower development; photomorphogenesis; proteolysis; root development	GO:0004180 GO:0008233 GO:0016805	carboxypeptidase activity; dipeptidase activity; peptidase activity	GO:0005886	plasma membrane
Glyma.03G209200	Only JY93	up	NA	NA		NA	NA	NA	NA	NA	NA
Glyma.03G210500	Only K6	up	AT3G62930	Thioredoxin superfamily protein		GO:0045454 GO:0048653	anther development; cell redox homeostasis	GO:0008794 GO:0009055 GO:0015035	arsenate reductase (glutaredoxin) activity; electron carrier activity; protein disulfide oxidoreductase activity	GO:0005575	cellular component
Glyma.03G210700	Only K6	up	AT1G03010	Phototropic-responsive NPH3 family protein		GO:0009416 GO:0009860	pollen tube growth; response to light stimulus	GO:0004871	signal transducer activity	GO:0005886	plasma membrane
Glyma.03G211900	Only K6	down	AT1G02970	WEE1 kinase homolog		GO:0000076 GO:0000278 GO:0000280 GO:0000724 GO:0000911 GO:0006260 GO:0006261 GO:0006270 GO:0006275 GO:0006306 GO:0007050 GO:0008283 GO:0009555 GO:0010389 GO:0016444 GO:0016568 GO:0031047 GO:0042023 GO:0051225 GO:0051567 GO:0051726	DNA-dependent DNA replication; DNA endoreduplication; DNA methylation; DNA replication; DNA replication checkpoint; DNA replication initiation; cell cycle arrest; cell proliferation; chromatin modification; cytokinesis by cell plate formation; double-strand break repair via homologous recombination; gene silencing by RNA; histone H3-K9 methylation; mitotic cell cycle; nuclear division; pollen dev…	GO:0004672 GO:0004674 GO:0005515 GO:0005524 GO:0016301 GO:0016772	ATP binding; kinase activity; protein binding; protein kinase activity; protein serine/threonine kinase activity; transferase activity, transferring phosphorus-containing groups	GO:0005634	nucleus
Glyma.03G212500	Only JY93	down	NA	NA		NA	NA	NA	NA	NA	NA
Glyma.03G213000	Only JY93	up	AT4G15800	ralf-like 33		GO:0007267	cell-cell signaling	GO:0004871	signal transducer activity	GO:0005576 GO:0009505 GO:0009506 GO:0048046	apoplast; extracellular region; plant-type cell wall; plasmodesma
Glyma.03G213300	Only JY93	up	AT2G47770	TSPO(outer membrane tryptophan-rich sensory protein)-related		GO:0006778 GO:0006970 GO:0009651 GO:0009737	porphyrin-containing compound metabolic process; response to abscisic acid stimulus; response to osmotic stress; response to salt stress	GO:0020037	heme binding	GO:0005739 GO:0005783 GO:0005794 GO:0005795 GO:0016020 GO:0016021	Golgi apparatus; Golgi stack; endoplasmic reticulum; integral to membrane; membrane; mitochondrion
Glyma.03G214300	Only K6	down	AT4G02440	F-box family protein		GO:0006511 GO:0009585 GO:0010099 GO:0032880 GO:0042752 GO:0048366 GO:0048573	leaf development; photoperiodism, flowering; red, far-red light phototransduction; regulation of circadian rhythm; regulation of photomorphogenesis; regulation of protein localization; ubiquitin-dependent protein catabolic process	GO:0004842 GO:0005515	protein binding; ubiquitin-protein ligase activity	GO:0005634	nucleus
Glyma.03G214600	Only K6	down	AT3G62820	Plant invertase/pectin methylesterase inhibitor superfamily protein		NA	NA	GO:0004857 GO:0030599 GO:0046910	enzyme inhibitor activity; pectinesterase activity; pectinesterase inhibitor activity	NA	NA
Glyma.03G215100	Only K6	up	AT4G02360	Protein of unknown function, DUF538		GO:0008150	biological process	GO:0003674	molecular function	GO:0005576	extracellular region
Glyma.03G217000	Only JY93	up	AT2G47500	P-loop nucleoside triphosphate hydrolases superfamily protein with CH (Calponin Homology) domain		GO:0007018	microtubule-based movement	GO:0003777 GO:0005524	ATP binding; microtubule motor activity	GO:0005737	cytoplasm
Glyma.03G218000	Only K6	up	AT2G47480	Protein of unknown function (DUF3511)		GO:0008150	biological process	GO:0003674	molecular function	GO:0005739	mitochondrion
Glyma.03G218900	Only JY93	down	AT1G18290	NA		GO:0006499	N-terminal protein myristoylation	GO:0003674	molecular function	GO:0005634	nucleus
Glyma.03G219200	Only K6	down	AT4G02060	Minichromosome maintenance (MCM2/3/5) family protein		GO:0006260 GO:0006268 GO:0006270 GO:0006306 GO:0006342 GO:0008283 GO:0010182 GO:0051567	DNA methylation; DNA replication; DNA replication initiation; DNA unwinding involved in replication; cell proliferation; chromatin silencing; histone H3-K9 methylation; sugar mediated signaling pathway	GO:0000166 GO:0003677 GO:0005515 GO:0005524 GO:0008094 GO:0017111	ATP binding; DNA-dependent ATPase activity; DNA binding; nucleoside-triphosphatase activity; nucleotide binding; protein binding	GO:0000790 GO:0005634 GO:0005737	cytoplasm; nuclear chromatin; nucleus
Glyma.03G221100	Only JY93	up	AT1G02390	glycerol-3-phosphate acyltransferase 2		GO:0006655 GO:0008152	metabolic process; phosphatidylglycerol biosynthetic process	GO:0016746	transferase activity, transferring acyl groups	GO:0005739	mitochondrion
Glyma.03G221400	Only JY93	up	AT2G47240	AMP-dependent synthetase and ligase family protein		GO:0001676 GO:0006631 GO:0006633 GO:0009627 GO:0010025 GO:0010103 GO:0010143 GO:0034976	cutin biosynthetic process; fatty acid biosynthetic process; fatty acid metabolic process; long-chain fatty acid metabolic process; response to endoplasmic reticulum stress; stomatal complex morphogenesis; systemic acquired resistance; wax biosynthetic process	GO:0003824 GO:0004467 GO:0031957	catalytic activity; long-chain fatty acid-CoA ligase activity; very long-chain fatty acid-CoA ligase activity	GO:0005634 GO:0005783	endoplasmic reticulum; nucleus
Glyma.03G223600	Only K6	up	AT1G75250	RAD-like 6		GO:0006355	regulation of transcription, DNA-dependent	GO:0003677 GO:0003700	DNA binding; sequence-specific DNA binding transcription factor activity	GO:0005634 GO:0009507	chloroplast; nucleus
Glyma.03G224100	Only K6	up	AT1G02520	P-glycoprotein 11		GO:0006810 GO:0055085	transmembrane transport; transport	GO:0000166 GO:0005524 GO:0016887 GO:0017111 GO:0042626	ATP binding; ATPase activity; ATPase activity, coupled to transmembrane movement of substances; nucleoside-triphosphatase activity; nucleotide binding	GO:0005634 GO:0005886 GO:0009506 GO:0016021	integral to membrane; nucleus; plasma membrane; plasmodesma
Glyma.03G225000	Only K6	down	AT1G09530	phytochrome interacting factor 3	bHLH	GO:0006355 GO:0007165 GO:0007623 GO:0009630 GO:0009639 GO:0009704 GO:0009740 GO:0010017 GO:0031539	circadian rhythm; de-etiolation; gibberellic acid mediated signaling pathway; gravitropism; positive regulation of anthocyanin metabolic process; red or far-red light signaling pathway; regulation of transcription, DNA-dependent; response to red or far red light; signal transduction	GO:0003677 GO:0003700 GO:0005515 GO:0042802	DNA binding; identical protein binding; protein binding; sequence-specific DNA binding transcription factor activity	GO:0005634	nucleus
Glyma.03G226000	Only K6	up	AT5G66460	Glycosyl hydrolase superfamily protein		GO:0008152 GO:0009845 GO:0009855 GO:0009944 GO:0010014 GO:0010075	determination of bilateral symmetry; meristem initiation; metabolic process; polarity specification of adaxial/abaxial axis; regulation of meristem growth; seed germination	GO:0004553 GO:0016985	hydrolase activity, hydrolyzing O-glycosyl compounds; mannan endo-1,4-beta-mannosidase activity	GO:0005576 GO:0071944	cell periphery; extracellular region
Glyma.03G226500	Only JY93	down	AT1G73177	bonsai		GO:0009640 GO:0009793 GO:0009845 GO:0009909 GO:0009933 GO:0010162 GO:0010182 GO:0010228 GO:0010229 GO:0016567 GO:0019915 GO:0048827 GO:0050826	embryo development ending in seed dormancy; inflorescence development; lipid storage; meristem structural organization; photomorphogenesis; phyllome development; protein ubiquitination; regulation of flower development; response to freezing; seed dormancy process; seed germination; sugar mediated signaling pathway; vegetative to reproductive phase transition of meristem	GO:0003674	molecular function	GO:0005634 GO:0005680	anaphase-promoting complex; nucleus
Glyma.03G227200	Only JY93	down	NA	NA		NA	NA	NA	NA	NA	NA
Glyma.03G228000	Only JY93	down	AT3G05858	NA		GO:0008150	biological process	GO:0003674	molecular function	GO:0005634	nucleus
Glyma.03G232000	Only JY93	up	AT2G47470	thioredoxin family protein		GO:0006094 GO:0006096 GO:0006662 GO:0009553 GO:0009567 GO:0009627 GO:0009651 GO:0009793 GO:0034976 GO:0045454 GO:0046686 GO:0048868	cell redox homeostasis; double fertilization forming a zygote and endosperm; embryo development ending in seed dormancy; embryo sac development; gluconeogenesis; glycerol ether metabolic process; glycolysis; pollen tube development; response to cadmium ion; response to endoplasmic reticulum stress; response to salt stress; systemic acquired resistance	GO:0003756 GO:0009055 GO:0015035 GO:0016853	electron carrier activity; isomerase activity; protein disulfide isomerase activity; protein disulfide oxidoreductase activity	GO:0005576 GO:0005774 GO:0005783 GO:0009505	endoplasmic reticulum; extracellular region; plant-type cell wall; vacuolar membrane
Glyma.03G232700	Only K6	up	AT1G56300	Chaperone DnaJ-domain superfamily protein		GO:0006457	protein folding	GO:0031072	heat shock protein binding	GO:0005737	cytoplasm
Glyma.03G233900	Only JY93	down	AT1G09155	phloem protein 2-B15		NA	NA	GO:0030246	carbohydrate binding	GO:0005634	nucleus
Glyma.03G234100	Only K6	up	AT5G27870	Plant invertase/pectin methylesterase inhibitor superfamily		GO:0042545	cell wall modification	GO:0004857 GO:0030599	enzyme inhibitor activity; pectinesterase activity	GO:0005618 GO:0005634 GO:0009505	cell wall; nucleus; plant-type cell wall
Glyma.03G234500	Only JY93	down	AT3G05600	alpha/beta-Hydrolases superfamily protein		NA	NA	GO:0003824 GO:0004301	catalytic activity; epoxide hydrolase activity	GO:0005737	cytoplasm
Glyma.03G234800	Only JY93	down	AT1G56220	Dormancy/auxin associated family protein		GO:0009741 GO:0032880	regulation of protein localization; response to brassinosteroid stimulus	GO:0003674	molecular function	GO:0005634	nucleus
Glyma.03G237300	Only JY93	up	AT1G55020	lipoxygenase 1		GO:0006952 GO:0009611 GO:0009695 GO:0009737 GO:0009753 GO:0009816 GO:0010311 GO:0030397 GO:0034440 GO:0040007 GO:0048364	defense response; defense response to bacterium, incompatible interaction; growth; jasmonic acid biosynthetic process; lateral root formation; lipid oxidation; membrane disassembly; response to abscisic acid stimulus; response to jasmonic acid stimulus; response to wounding; root development	GO:0016165	lipoxygenase activity	GO:0005737 GO:0009536	cytoplasm; plastid
Glyma.03G237800	Only JY93	up	AT5G27550	P-loop containing nucleoside triphosphate hydrolases superfamily protein		GO:0007018	microtubule-based movement	GO:0003777 GO:0005524	ATP binding; microtubule motor activity	GO:0005737	cytoplasm
Glyma.03G238800	Only K6	down	AT1G54870	NAD(P)-binding Rossmann-fold superfamily protein		GO:0008152 GO:0055114	metabolic process; oxidation-reduction process	GO:0000166 GO:0008106 GO:0016491	alcohol dehydrogenase (NADP+) activity; nucleotide binding; oxidoreductase activity	GO:0009507	chloroplast
Glyma.03G239000	Only K6	up	AT5G27450	mevalonate kinase		GO:0000280 GO:0006012 GO:0007000 GO:0008152 GO:0008299 GO:0046835	carbohydrate phosphorylation; galactose metabolic process; isoprenoid biosynthetic process; metabolic process; nuclear division; nucleolus organization	GO:0004335 GO:0004496 GO:0005524 GO:0016301 GO:0016773	ATP binding; galactokinase activity; kinase activity; mevalonate kinase activity; phosphotransferase activity, alcohol group as acceptor	GO:0005737 GO:0005829	cytoplasm; cytosol
Glyma.03G239800	Only K6	up	AT3G06130	Heavy metal transport/detoxification superfamily protein		GO:0030001	metal ion transport	GO:0046872	metal ion binding	GO:0005618 GO:0005737	cell wall; cytoplasm
Glyma.03G240500	Only JY93	down	NA	NA		NA	NA	NA	NA	NA	NA
Glyma.03G246400	Only JY93	down	AT5G66980	AP2/B3-like transcriptional factor family protein	B3	GO:0006355	regulation of transcription, DNA-dependent	GO:0003677 GO:0003700	DNA binding; sequence-specific DNA binding transcription factor activity	GO:0005634	nucleus
Glyma.03G247500	Only JY93	up	AT3G04720	pathogenesis-related 4		GO:0009615 GO:0009627 GO:0009651 GO:0009723 GO:0009817 GO:0010167 GO:0015706 GO:0016998 GO:0042742 GO:0050832 GO:0080027	cell wall macromolecule catabolic process; defense response to bacterium; defense response to fungus; defense response to fungus, incompatible interaction; nitrate transport; response to ethylene stimulus; response to herbivore; response to nitrate; response to salt stress; response to virus; systemic acquired resistance	GO:0004540 GO:0008061	chitin binding; ribonuclease activity	GO:0005576	extracellular region
Glyma.03G248100	Only JY93	up	AT3G04620	Alba DNA/RNA-binding protein		GO:0006302 GO:0010332 GO:0048235	double-strand break repair; pollen sperm cell differentiation; response to gamma radiation	GO:0003676	nucleic acid binding	NA	NA
Glyma.03G248400	Only JY93	down	AT1G60750	NAD(P)-linked oxidoreductase superfamily protein		GO:0055114	oxidation-reduction process	GO:0016491	oxidoreductase activity	GO:0005737	cytoplasm
Glyma.03G250500	Only JY93	up	AT5G63700	zinc ion binding;DNA binding		GO:0006352 GO:0010264 GO:0016570	DNA-dependent transcription, initiation; histone modification; myo-inositol hexakisphosphate biosynthetic process	GO:0003677 GO:0008270	DNA binding; zinc ion binding	GO:0005634	nucleus
Glyma.03G250600	Only JY93	up	AT3G23250	myb domain protein 15	MYB	GO:0002679 GO:0006355 GO:0007165 GO:0009414 GO:0009611 GO:0009651 GO:0009695 GO:0009723 GO:0009733 GO:0009737 GO:0009738 GO:0009753 GO:0009867 GO:0009873 GO:0010200 GO:0035556 GO:0042538 GO:0046686 GO:0052542	abscisic acid mediated signaling pathway; defense response by callose deposition; ethylene mediated signaling pathway; hyperosmotic salinity response; intracellular signal transduction; jasmonic acid biosynthetic process; jasmonic acid mediated signaling pathway; regulation of transcription, DNA-dependent; respiratory burst involved in defense response; response to abscisic acid stimulus; respons…	GO:0003677 GO:0003700	DNA binding; sequence-specific DNA binding transcription factor activity	GO:0005634	nucleus
Glyma.03G251400	Only K6	down	AT3G04530	phosphoenolpyruvate carboxylase kinase 2		GO:0006468 GO:0016036 GO:0019375 GO:0045892	cellular response to phosphate starvation; galactolipid biosynthetic process; negative regulation of transcription, DNA-dependent; protein phosphorylation	GO:0004672 GO:0004674 GO:0004713 GO:0005524 GO:0016301 GO:0016772	ATP binding; kinase activity; protein kinase activity; protein serine/threonine kinase activity; protein tyrosine kinase activity; transferase activity, transferring phosphorus-containing groups	GO:0005634	nucleus
Glyma.03G251700	Only JY93	down	AT3G04580	Signal transduction histidine kinase, hybrid-type, ethylene sensor		GO:0000160 GO:0006355 GO:0007165 GO:0009738 GO:0009873 GO:0010105 GO:0030968 GO:0035556	abscisic acid mediated signaling pathway; endoplasmic reticulum unfolded protein response; ethylene mediated signaling pathway; intracellular signal transduction; negative regulation of ethylene mediated signaling pathway; phosphorelay signal transduction system; regulation of transcription, DNA-dependent; signal transduction	GO:0000155 GO:0000156 GO:0004673 GO:0004674 GO:0004871 GO:0004872 GO:0005524 GO:0051740	ATP binding; ethylene binding; phosphorelay response regulator activity; phosphorelay sensor kinase activity; protein histidine kinase activity; protein serine/threonine kinase activity; receptor activity; signal transducer activity	GO:0005783	endoplasmic reticulum
Glyma.03G252700	Only K6	up	AT5G33370	GDSL-like Lipase/Acylhydrolase superfamily protein		GO:0006629	lipid metabolic process	GO:0004091 GO:0016788	carboxylesterase activity; hydrolase activity, acting on ester bonds	GO:0005576	extracellular region
Glyma.03G253200	Only K6	up	AT4G02380	senescence-associated gene 21		GO:0000165 GO:0000302 GO:0006612 GO:0006979 GO:0007154 GO:0009409 GO:0009611 GO:0009738 GO:0009790 GO:0009862 GO:0009867 GO:0010363 GO:0016036 GO:0019375 GO:0030968 GO:0031348 GO:0042631 GO:0043069 GO:0050832	MAPK cascade; abscisic acid mediated signaling pathway; cell communication; cellular response to phosphate starvation; cellular response to water deprivation; defense response to fungus; embryo development; endoplasmic reticulum unfolded protein response; galactolipid biosynthetic process; jasmonic acid mediated signaling pathway; negative regulation of defense response; negative regulation of pr…	GO:0003674	molecular function	GO:0009507	chloroplast
Glyma.03G256200	Only K6	up	AT2G46370	Auxin-responsive GH3 family protein		GO:0009585 GO:0009611 GO:0009627 GO:0009640 GO:0009694 GO:0009733 GO:0009753 GO:0009861 GO:0009864 GO:0010046 GO:0010119 GO:0010193 GO:0010224 GO:0031348 GO:0071365 GO:2000030 GO:2000377	cellular response to auxin stimulus; induced systemic resistance, jasmonic acid mediated signaling pathway; jasmonic acid and ethylene-dependent systemic resistance; jasmonic acid metabolic process; negative regulation of defense response; photomorphogenesis; red, far-red light phototransduction; regulation of reactive oxygen species metabolic process; regulation of response to red or far red lig…	GO:0003824 GO:0005524 GO:0019899 GO:0070566 GO:0080123	ATP binding; adenylyltransferase activity; catalytic activity; enzyme binding; jasmonate-amino synthetase activity	GO:0005634 GO:0005737 GO:0005773	cytoplasm; nucleus; vacuole
Glyma.03G256700	Only K6	up	AT5G24110	WRKY DNA-binding protein 30	WRKY	GO:0006355 GO:0009751 GO:0010193 GO:0042542	regulation of transcription, DNA-dependent; response to hydrogen peroxide; response to ozone; response to salicylic acid stimulus	GO:0003700 GO:0005515 GO:0043565	protein binding; sequence-specific DNA binding; sequence-specific DNA binding transcription factor activity	GO:0005634 GO:0005737	cytoplasm; nucleus
Glyma.03G257000	Only K6	up	AT5G53130	cyclic nucleotide gated channel 1		GO:0006811 GO:0006813 GO:0006816 GO:0055085	calcium ion transport; ion transport; potassium ion transport; transmembrane transport	GO:0005216 GO:0005221 GO:0005242 GO:0005261 GO:0005516 GO:0030551	calmodulin binding; cation channel activity; cyclic nucleotide binding; intracellular cyclic nucleotide activated cation channel activity; inward rectifier potassium channel activity; ion channel activity	GO:0005886 GO:0016020	membrane; plasma membrane
Glyma.03G257900	Only K6	up	AT1G01300	Eukaryotic aspartyl protease family protein		GO:0006508 GO:0009664 GO:0042545 GO:0080167	cell wall modification; plant-type cell wall organization; proteolysis; response to karrikin	GO:0004190	aspartic-type endopeptidase activity	GO:0005576 GO:0009505 GO:0016020	extracellular region; membrane; plant-type cell wall
Glyma.03G258100	Only K6	up	AT1G01260	basic helix-loop-helix (bHLH) DNA-binding superfamily protein	bHLH	GO:0006355 GO:0009694 GO:0009753	jasmonic acid metabolic process; regulation of transcription, DNA-dependent; response to jasmonic acid stimulus	GO:0003677 GO:0003700	DNA binding; sequence-specific DNA binding transcription factor activity	GO:0005634	nucleus
Glyma.03G260800	Only JY93	up	NA	NA		NA	NA	NA	NA	NA	NA
Glyma.03G261300	Only JY93	up	AT5G24470	pseudo-response regulator 5		GO:0000160 GO:0005982 GO:0006355 GO:0007623 GO:0009639 GO:0009640 GO:0010114 GO:0010218 GO:0042752 GO:0045892 GO:0048574 GO:0051170	circadian rhythm; long-day photoperiodism, flowering; negative regulation of transcription, DNA-dependent; nuclear import; phosphorelay signal transduction system; photomorphogenesis; regulation of circadian rhythm; regulation of transcription, DNA-dependent; response to far red light; response to red light; response to red or far red light; starch metabolic process	GO:0000156 GO:0003677	DNA binding; phosphorelay response regulator activity	GO:0005634	nucleus
Glyma.03G261800	Only JY93	up	AT1G01060	Homeodomain-like superfamily protein	MYB_related	GO:0006355 GO:0007623 GO:0009409 GO:0009639 GO:0009651 GO:0009723 GO:0009733 GO:0009737 GO:0009739 GO:0009751 GO:0009753 GO:0042752 GO:0042754 GO:0043433 GO:0046686 GO:0048574	circadian rhythm; long-day photoperiodism, flowering; negative regulation of circadian rhythm; negative regulation of sequence-specific DNA binding transcription factor activity; regulation of circadian rhythm; regulation of transcription, DNA-dependent; response to abscisic acid stimulus; response to auxin stimulus; response to cadmium ion; response to cold; response to ethylene stimulus; respon…	GO:0003677 GO:0003700 GO:0044212	DNA binding; sequence-specific DNA binding transcription factor activity; transcription regulatory region DNA binding	GO:0005634	nucleus
Glyma.03G262100	Only JY93	up	AT1G01040	dicer-like 1		GO:0000226 GO:0000278 GO:0000910 GO:0000911 GO:0006306 GO:0006342 GO:0006396 GO:0007267 GO:0009616 GO:0009630 GO:0009880 GO:0009908 GO:0010050 GO:0010098 GO:0010228 GO:0010267 GO:0010599 GO:0016569 GO:0030422 GO:0031047 GO:0031053 GO:0035196 GO:0035279 GO:0051607 GO:2000034	DNA methylation; RNA processing; cell-cell signaling; chromatin silencing; covalent chromatin modification; cytokinesis; cytokinesis by cell plate formation; defense response to virus; embryonic pattern specification; flower development; gene silencing by RNA; gravitropism; mRNA cleavage involved in gene silencing by miRNA; microtubule cytoskeleton organization; mitotic cell cycle; primary miRNA …	GO:0003676 GO:0003677 GO:0003723 GO:0003725 GO:0004386 GO:0004525 GO:0005515 GO:0005524 GO:0008026 GO:0016787 GO:0016891	ATP-dependent helicase activity; ATP binding; DNA binding; RNA binding; double-stranded RNA binding; endoribonuclease activity, producing 5'-phosphomonoesters; helicase activity; hydrolase activity; nucleic acid binding; protein binding; ribonuclease III activity	GO:0005622 GO:0005634 GO:0010445	intracellular; nuclear dicing body; nucleus
Glyma.03G262600	Only JY93	up	AT1G17260	autoinhibited H(+)-ATPase isoform 10		GO:0006200 GO:0006754 GO:0006812 GO:0007033 GO:0007035 GO:0008152 GO:0010023	ATP biosynthetic process; ATP catabolic process; cation transport; metabolic process; proanthocyanidin biosynthetic process; vacuolar acidification; vacuole organization	GO:0000166 GO:0003824 GO:0005524 GO:0015662 GO:0016887 GO:0019829 GO:0046872	ATP binding; ATPase activity; ATPase activity, coupled to transmembrane movement of ions, phosphorylative mechanism; catalytic activity; cation-transporting ATPase activity; metal ion binding; nucleotide binding	GO:0005886 GO:0009506 GO:0009507 GO:0016020 GO:0016021	chloroplast; integral to membrane; membrane; plasma membrane; plasmodesma
Glyma.03G263000	Only K6	up	AT1G72310	RING/U-box superfamily protein		NA	NA	GO:0008270	zinc ion binding	GO:0005634	nucleus
Glyma.03G264300	Only JY93	up	AT1G72520	PLAT/LH2 domain-containing lipoxygenase family protein		GO:0006952 GO:0009555 GO:0009611 GO:0009617 GO:0009620 GO:0009695 GO:0009753 GO:0009873 GO:0009901 GO:0010193 GO:0010200 GO:0034440 GO:0040007 GO:0048653 GO:0052542 GO:0080086	anther dehiscence; anther development; defense response; defense response by callose deposition; ethylene mediated signaling pathway; growth; jasmonic acid biosynthetic process; lipid oxidation; pollen development; response to bacterium; response to chitin; response to fungus; response to jasmonic acid stimulus; response to ozone; response to wounding; stamen filament development	GO:0016165	lipoxygenase activity	GO:0009507	chloroplast
Glyma.04G002300	Only JY93	down	AT2G43030	Ribosomal protein L3 family protein		GO:0006364 GO:0006412 GO:0010207 GO:0015995 GO:0019288 GO:0045036	chlorophyll biosynthetic process; isopentenyl diphosphate biosynthetic process, mevalonate-independent pathway; photosystem II assembly; protein targeting to chloroplast; rRNA processing; translation	GO:0003735	structural constituent of ribosome	GO:0005840 GO:0009507 GO:0009570 GO:0009941 GO:0016020	chloroplast; chloroplast envelope; chloroplast stroma; membrane; ribosome
Glyma.04G003200	Only K6	down	AT4G35100	plasma membrane intrinsic protein 3		GO:0006810 GO:0006833 GO:0009651 GO:0009737 GO:0055085	response to abscisic acid stimulus; response to salt stress; transmembrane transport; transport; water transport	GO:0005215 GO:0005515 GO:0015250	protein binding; transporter activity; water channel activity	GO:0005634 GO:0005773 GO:0005886 GO:0009506 GO:0016020 GO:0016021 GO:0046658	anchored to plasma membrane; integral to membrane; membrane; nucleus; plasma membrane; plasmodesma; vacuole
Glyma.04G003400	Only K6	down	AT2G47140	NAD(P)-binding Rossmann-fold superfamily protein		GO:0008152	metabolic process	GO:0000166 GO:0016491	nucleotide binding; oxidoreductase activity	GO:0005737	cytoplasm
Glyma.04G003500	Only K6	down	AT2G16800	high-affinity nickel-transport family protein		GO:0000394 GO:0009086 GO:0009220 GO:0009616 GO:0010050 GO:0015675 GO:0030001 GO:0055085	RNA splicing, via endonucleolytic cleavage and ligation; metal ion transport; methionine biosynthetic process; nickel cation transport; pyrimidine ribonucleotide biosynthetic process; transmembrane transport; vegetative phase change; virus induced gene silencing	GO:0015099 GO:0046872	metal ion binding; nickel cation transmembrane transporter activity	GO:0005886 GO:0016021	integral to membrane; plasma membrane
Glyma.04G004900	Only JY93	down	AT2G21060	glycine-rich protein 2B		GO:0009409 GO:0009790 GO:0010154	embryo development; fruit development; response to cold	GO:0003676 GO:0003677 GO:0008270	DNA binding; nucleic acid binding; zinc ion binding	GO:0005634 GO:0005829	cytosol; nucleus
Glyma.04G005200	Only K6	up	AT2G21120	Protein of unknown function (DUF803)		GO:0008150 GO:0009625 GO:0009862 GO:0031348	biological process; negative regulation of defense response; response to insect; systemic acquired resistance, salicylic acid mediated signaling pathway	NA	NA	GO:0005886	plasma membrane
Glyma.04G005400	Only K6	down	AT2G21140	proline-rich protein 2		GO:0009664	plant-type cell wall organization	NA	NA	GO:0005618	cell wall
Glyma.04G006200	Only K6	down	AT4G38810	Calcium-binding EF-hand family protein		NA	NA	GO:0005509	calcium ion binding	GO:0005634	nucleus
Glyma.04G006600	Only JY93	up	AT5G18050	SAUR-like auxin-responsive protein family		GO:0009733	response to auxin stimulus	GO:0003674	molecular function	GO:0005739	mitochondrion
Glyma.04G006900	Only K6	up	AT5G18060	SAUR-like auxin-responsive protein family		GO:0009733	response to auxin stimulus	GO:0003674	molecular function	NA	NA
Glyma.04G007100	Only K6	down	AT4G34760	SAUR-like auxin-responsive protein family		GO:0009733	response to auxin stimulus	GO:0003674	molecular function	GO:0005739	mitochondrion
Glyma.04G008900	Only K6	up	AT4G36240	GATA transcription factor 7	GATA	GO:0006355 GO:0007623 GO:0009416 GO:0045893	circadian rhythm; positive regulation of transcription, DNA-dependent; regulation of transcription, DNA-dependent; response to light stimulus	GO:0003677 GO:0003700 GO:0008270 GO:0043565	DNA binding; sequence-specific DNA binding; sequence-specific DNA binding transcription factor activity; zinc ion binding	GO:0005634	nucleus
Glyma.04G012500	Only JY93	up	AT4G34530	cryptochrome-interacting basic-helix-loop-helix 1	bHLH	GO:0006351 GO:0009911	positive regulation of flower development; transcription, DNA-dependent	GO:0003677 GO:0003700	DNA binding; sequence-specific DNA binding transcription factor activity	GO:0005634	nucleus
Glyma.04G013800	Only K6	up	AT1G74950	TIFY domain/Divergent CCT motif family protein		GO:0006612 GO:0007165 GO:0009414 GO:0009611 GO:0009620 GO:0009695 GO:0009723 GO:0009733 GO:0009738 GO:0009753 GO:0009863 GO:0009867 GO:0010363 GO:0042538 GO:0043069	abscisic acid mediated signaling pathway; hyperosmotic salinity response; jasmonic acid biosynthetic process; jasmonic acid mediated signaling pathway; negative regulation of programmed cell death; protein targeting to membrane; regulation of plant-type hypersensitive response; response to auxin stimulus; response to ethylene stimulus; response to fungus; response to jasmonic acid stimulus; respo…	GO:0005515	protein binding	GO:0005634	nucleus
Glyma.04G014000	Only K6	down	AT3G18830	polyol/monosaccharide transporter 5		GO:0006810 GO:0031348 GO:0043090 GO:0055085	amino acid import; negative regulation of defense response; transmembrane transport; transport	GO:0005215 GO:0005351 GO:0005354 GO:0005355 GO:0005365 GO:0015144 GO:0015145 GO:0015148 GO:0015168 GO:0015575 GO:0015576 GO:0015591 GO:0022857 GO:0022891	D-ribose transmembrane transporter activity; D-xylose transmembrane transporter activity; carbohydrate transmembrane transporter activity; galactose transmembrane transporter activity; glucose transmembrane transporter activity; glycerol transmembrane transporter activity; mannitol transmembrane transporter activity; monosaccharide transmembrane transporter activity; myo-inositol transmembrane tr…	GO:0005886 GO:0016020 GO:0016021	integral to membrane; membrane; plasma membrane
Glyma.04G015000	Only JY93	down	AT4G35300	tonoplast monosaccharide transporter2		GO:0006810 GO:0055085	transmembrane transport; transport	GO:0005215 GO:0005337 GO:0005351 GO:0015144 GO:0022857 GO:0022891	carbohydrate transmembrane transporter activity; nucleoside transmembrane transporter activity; substrate-specific transmembrane transporter activity; sugar:hydrogen symporter activity; transmembrane transporter activity; transporter activity	GO:0005773 GO:0005774 GO:0005794 GO:0016020 GO:0016021	Golgi apparatus; integral to membrane; membrane; vacuolar membrane; vacuole
Glyma.04G015200	Only K6	down	AT1G20823	RING/U-box superfamily protein		GO:0010200	response to chitin	GO:0008270	zinc ion binding	GO:0009507	chloroplast
Glyma.04G016900	Only K6	up	AT1G20670	DNA-binding bromodomain-containing protein		GO:0008150	biological process	GO:0003677	DNA binding	GO:0005634	nucleus
Glyma.04G017200	Only JY93	up	AT1G76360	Protein kinase superfamily protein		GO:0002237 GO:0006468 GO:0006612 GO:0009963 GO:0010363	positive regulation of flavonoid biosynthetic process; protein phosphorylation; protein targeting to membrane; regulation of plant-type hypersensitive response; response to molecule of bacterial origin	GO:0004672 GO:0004674 GO:0005524 GO:0016301 GO:0016772	ATP binding; kinase activity; protein kinase activity; protein serine/threonine kinase activity; transferase activity, transferring phosphorus-containing groups	GO:0009507	chloroplast
Glyma.04G017400	Only K6	down	AT1G20640	Plant regulator RWP-RK family protein	Nin-like	GO:0009877	nodulation	GO:0003700	sequence-specific DNA binding transcription factor activity	GO:0005634	nucleus
Glyma.04G018400	Only JY93	up	AT1G42430	NA		GO:0008150	biological process	GO:0003674	molecular function	GO:0005575	cellular component
Glyma.04G019500	Only JY93	up	AT1G76160	SKU5 similar 5		GO:0016126 GO:0052541 GO:0052546 GO:0055114	cell wall pectin metabolic process; oxidation-reduction process; plant-type cell wall cellulose metabolic process; sterol biosynthetic process	GO:0005507 GO:0016491	copper ion binding; oxidoreductase activity	GO:0005576 GO:0005618 GO:0009505 GO:0009506 GO:0048046	apoplast; cell wall; extracellular region; plant-type cell wall; plasmodesma
Glyma.04G020400	Only JY93	up	AT4G35790	phospholipase D delta		GO:0009409 GO:0009789 GO:0012501 GO:0046473 GO:0090333	phosphatidic acid metabolic process; positive regulation of abscisic acid mediated signaling pathway; programmed cell death; regulation of stomatal closure; response to cold	GO:0003824 GO:0004630 GO:0005509	calcium ion binding; catalytic activity; phospholipase D activity	GO:0005773 GO:0005886 GO:0009506 GO:0015630 GO:0016020	membrane; microtubule cytoskeleton; plasma membrane; plasmodesma; vacuole
Glyma.04G020500	Only JY93	down	AT2G16990	Major facilitator superfamily protein		GO:0055085	transmembrane transport	GO:0008493	tetracycline transporter activity	GO:0016021	integral to membrane
Glyma.04G020700	Only K6	up	AT1G76070	NA		GO:0008150 GO:0010200 GO:0050832	biological process; defense response to fungus; response to chitin	GO:0003674	molecular function	GO:0005634 GO:0005886	nucleus; plasma membrane
Glyma.04G020800	Only K6	up	AT1G20270	2-oxoglutarate (2OG) and Fe(II)-dependent oxygenase superfamily protein		GO:0018401 GO:0055114	oxidation-reduction process; peptidyl-proline hydroxylation to 4-hydroxy-L-proline	GO:0005506 GO:0016491 GO:0016705 GO:0016706 GO:0031418	L-ascorbic acid binding; iron ion binding; oxidoreductase activity; oxidoreductase activity, acting on paired donors, with incorporation or reduction of molecular oxygen; oxidoreductase activity, acting on paired donors, with incorporation or reduction of molecular oxygen, 2-oxoglutarate as one donor, and incorporation of one atom each of oxygen into both donors	GO:0005739 GO:0005768 GO:0005794 GO:0005802	Golgi apparatus; endosome; mitochondrion; trans-Golgi network
Glyma.04G021600	Only JY93	up	AT1G20190	expansin 11		GO:0009664 GO:0009826 GO:0009828 GO:0009831	plant-type cell wall loosening; plant-type cell wall modification involved in multidimensional cell growth; plant-type cell wall organization; unidimensional cell growth	NA	NA	GO:0005576 GO:0005618	cell wall; extracellular region
Glyma.04G022600	Only JY93	up	AT1G20160	Subtilisin-like serine endopeptidase family protein		GO:0006508 GO:0008152 GO:0043086	metabolic process; negative regulation of catalytic activity; proteolysis	GO:0004252 GO:0042802	identical protein binding; serine-type endopeptidase activity	GO:0005576 GO:0005618 GO:0048046	apoplast; cell wall; extracellular region
Glyma.04G024400	Only JY93	up	AT1G75750	GAST1 protein homolog 1		GO:0000271 GO:0006569 GO:0009684 GO:0009737 GO:0009739 GO:0009741 GO:0009825 GO:0009826 GO:0009932 GO:0010817 GO:0043481 GO:0048767 GO:0071555	anthocyanin accumulation in tissues in response to UV light; cell tip growth; cell wall organization; indoleacetic acid biosynthetic process; multidimensional cell growth; polysaccharide biosynthetic process; regulation of hormone levels; response to abscisic acid stimulus; response to brassinosteroid stimulus; response to gibberellin stimulus; root hair elongation; tryptophan catabolic process; …	GO:0003674	molecular function	GO:0005576 GO:0005618 GO:0009505	cell wall; extracellular region; plant-type cell wall
Glyma.04G026300	Only JY93	down	AT5G42520	basic pentacysteine 6	BBR-BPC	GO:0006355 GO:0009723	regulation of transcription, DNA-dependent; response to ethylene stimulus	GO:0003677 GO:0003700 GO:0005515 GO:0042803	DNA binding; protein binding; protein homodimerization activity; sequence-specific DNA binding transcription factor activity	GO:0005634 GO:0005730	nucleolus; nucleus
Glyma.04G026500	Only K6	up	AT4G24160	alpha/beta-Hydrolases superfamily protein		GO:0009407 GO:0010200 GO:0010583 GO:0052542 GO:0055088 GO:0055089 GO:0055091 GO:0070328	defense response by callose deposition; fatty acid homeostasis; lipid homeostasis; phospholipid homeostasis; response to chitin; response to cyclopentenone; toxin catabolic process; triglyceride homeostasis	GO:0004623 GO:0016298 GO:0016787 GO:0042171	hydrolase activity; lipase activity; lysophosphatidic acid acyltransferase activity; phospholipase A2 activity	NA	NA
Glyma.04G026600	Only K6	up	NA	NA		NA	NA	NA	NA	NA	NA
Glyma.04G027100	Only K6	up	AT3G54350	Forkhead-associated (FHA) domain-containing protein		GO:0006312 GO:0006346 GO:0009560 GO:0009630 GO:0009793 GO:0016246	RNA interference; embryo development ending in seed dormancy; embryo sac egg cell differentiation; gravitropism; methylation-dependent chromatin silencing; mitotic recombination	GO:0003674	molecular function	GO:0005634	nucleus
Glyma.04G028600	Only JY93	up	AT4G36360	beta-galactosidase 3		GO:0005975 GO:0005990 GO:0006598 GO:0009664 GO:0009698 GO:0009832 GO:0010075 GO:0019513 GO:0019515 GO:0042398	carbohydrate metabolic process; cellular modified amino acid biosynthetic process; lactose catabolic process; lactose catabolic process, using glucoside 3-dehydrogenase; lactose catabolic process via UDP-galactose; phenylpropanoid metabolic process; plant-type cell wall biogenesis; plant-type cell wall organization; polyamine catabolic process; regulation of meristem growth	GO:0003824 GO:0004553 GO:0004565 GO:0030246 GO:0043169	beta-galactosidase activity; carbohydrate binding; catalytic activity; cation binding; hydrolase activity, hydrolyzing O-glycosyl compounds	GO:0005576	extracellular region
Glyma.04G028900	Only K6	down	AT1G75450	cytokinin oxidase 5		GO:0009690 GO:0009694 GO:0009753 GO:0009823 GO:0055114	cytokinin catabolic process; cytokinin metabolic process; jasmonic acid metabolic process; oxidation-reduction process; response to jasmonic acid stimulus	GO:0003824 GO:0008762 GO:0016491 GO:0016614 GO:0019139 GO:0050660	UDP-N-acetylmuramate dehydrogenase activity; catalytic activity; cytokinin dehydrogenase activity; flavin adenine dinucleotide binding; oxidoreductase activity; oxidoreductase activity, acting on CH-OH group of donors	GO:0005576	extracellular region
Glyma.04G030100	Only JY93	down	AT1G19630	cytochrome P450, family 722, subfamily A, polypeptide 1		GO:0055114	oxidation-reduction process	GO:0005506 GO:0009055 GO:0016705 GO:0019825 GO:0020037	electron carrier activity; heme binding; iron ion binding; oxidoreductase activity, acting on paired donors, with incorporation or reduction of molecular oxygen; oxygen binding	GO:0005576	extracellular region
Glyma.04G030400	Only JY93	up	AT5G66460	Glycosyl hydrolase superfamily protein		GO:0008152 GO:0009845 GO:0009855 GO:0009944 GO:0010014 GO:0010075	determination of bilateral symmetry; meristem initiation; metabolic process; polarity specification of adaxial/abaxial axis; regulation of meristem growth; seed germination	GO:0004553 GO:0016985	hydrolase activity, hydrolyzing O-glycosyl compounds; mannan endo-1,4-beta-mannosidase activity	GO:0005576 GO:0071944	cell periphery; extracellular region
Glyma.04G031800	Only JY93	up	AT1G75210	HAD-superfamily hydrolase, subfamily IG, 5'-nucleotidase		GO:0008150	biological process	GO:0008253	5'-nucleotidase activity	GO:0009507	chloroplast
Glyma.04G033500	Only JY93	up	AT1G75100	J-domain protein required for chloroplast accumulation response 1		GO:0007015 GO:0009903 GO:0009904 GO:0071483	actin filament organization; cellular response to blue light; chloroplast accumulation movement; chloroplast avoidance movement	GO:0031072	heat shock protein binding	GO:0005737 GO:0009507	chloroplast; cytoplasm
Glyma.04G034500	Only K6	up	AT1G19310	RING/U-box superfamily protein		NA	NA	GO:0008270	zinc ion binding	GO:0005634	nucleus
Glyma.04G035000	Only JY93	down	AT5G42650	allene oxide synthase		GO:0000096 GO:0000165 GO:0006546 GO:0006569 GO:0006612 GO:0006636 GO:0006733 GO:0006766 GO:0006952 GO:0008652 GO:0009072 GO:0009106 GO:0009108 GO:0009117 GO:0009416 GO:0009595 GO:0009611 GO:0009620 GO:0009684 GO:0009694 GO:0009695 GO:0009697 GO:0009753 GO:0009862 GO:0009867 GO:0010200 GO:0010310 GO:0010363 GO:0015994 GO:0019216 GO:0019288 GO:0019373 GO:0019748 GO:0019761 GO:0031348 GO:0031407 GO:…	MAPK cascade; aromatic amino acid family metabolic process; cellular amino acid biosynthetic process; chlorophyll metabolic process; coenzyme biosynthetic process; defense response; defense response to bacterium; defense response to fungus; detection of biotic stimulus; epoxygenase P450 pathway; glucosinolate biosynthetic process; glycine catabolic process; indoleacetic acid biosynthetic process;…	GO:0005506 GO:0009055 GO:0009978 GO:0016705 GO:0016836 GO:0019825 GO:0020037	allene oxide synthase activity; electron carrier activity; heme binding; hydro-lyase activity; iron ion binding; oxidoreductase activity, acting on paired donors, with incorporation or reduction of molecular oxygen; oxygen binding	GO:0005739 GO:0009507 GO:0009534 GO:0009535 GO:0009579 GO:0009941 GO:0010287 GO:0016020	chloroplast; chloroplast envelope; chloroplast thylakoid; chloroplast thylakoid membrane; membrane; mitochondrion; plastoglobule; thylakoid
Glyma.04G036600	Only K6	up	AT2G15770	Cupredoxin superfamily protein		NA	NA	GO:0005507 GO:0009055	copper ion binding; electron carrier activity	GO:0005634	nucleus
Glyma.04G036900	Only K6	down	AT4G37080	Protein of unknown function, DUF547		GO:0008150	biological process	GO:0003674	molecular function	GO:0005634	nucleus
Glyma.04G043600	Only K6	down	AT5G43080	Cyclin A3;1		GO:0000079 GO:0000724 GO:0010389 GO:0051726	double-strand break repair via homologous recombination; regulation of G2/M transition of mitotic cell cycle; regulation of cell cycle; regulation of cyclin-dependent protein serine/threonine kinase activity	GO:0005515 GO:0016538 GO:0019901	cyclin-dependent protein serine/threonine kinase regulator activity; protein binding; protein kinase binding	GO:0005634	nucleus
Glyma.04G043900	Only K6	down	AT2G38185	RING/U-box superfamily protein		GO:0007067	mitosis	GO:0008270	zinc ion binding	GO:0005634	nucleus
Glyma.04G044900	Only K6	up	AT1G27730	salt tolerance zinc finger	C2H2	GO:0002679 GO:0006979 GO:0007165 GO:0009409 GO:0009414 GO:0009611 GO:0009612 GO:0009620 GO:0009644 GO:0009651 GO:0009695 GO:0009723 GO:0009733 GO:0009737 GO:0009738 GO:0009753 GO:0009873 GO:0010117 GO:0010200 GO:0015979 GO:0035264 GO:0035556 GO:0042538 GO:0045892	abscisic acid mediated signaling pathway; ethylene mediated signaling pathway; hyperosmotic salinity response; intracellular signal transduction; jasmonic acid biosynthetic process; multicellular organism growth; negative regulation of transcription, DNA-dependent; photoprotection; photosynthesis; respiratory burst involved in defense response; response to abscisic acid stimulus; response to auxi…	GO:0003676 GO:0003700 GO:0008270 GO:0043565	nucleic acid binding; sequence-specific DNA binding; sequence-specific DNA binding transcription factor activity; zinc ion binding	GO:0005634	nucleus
Glyma.04G046800	Only K6	up	AT1G10140	Uncharacterised conserved protein UCP031279		GO:0008150	biological process	GO:0003674	molecular function	GO:0005886	plasma membrane
Glyma.04G048100	Only K6	up	AT4G07960	Cellulose-synthase-like C12		NA	NA	GO:0016757 GO:0016759	cellulose synthase activity; transferase activity, transferring glycosyl groups	GO:0005794 GO:0009506	Golgi apparatus; plasmodesma
Glyma.04G048300	Only JY93	up	AT1G58440	FAD/NAD(P)-binding oxidoreductase family protein		GO:0000271 GO:0008152 GO:0009228 GO:0009414 GO:0016126 GO:0016132 GO:0019745 GO:0055114	brassinosteroid biosynthetic process; metabolic process; oxidation-reduction process; pentacyclic triterpenoid biosynthetic process; polysaccharide biosynthetic process; response to water deprivation; sterol biosynthetic process; thiamine biosynthetic process	GO:0004506 GO:0016491 GO:0050660	flavin adenine dinucleotide binding; oxidoreductase activity; squalene monooxygenase activity	GO:0005576 GO:0016021	extracellular region; integral to membrane
Glyma.04G049200	Only JY93	up	AT1G10070	branched-chain amino acid transaminase 2		GO:0008152 GO:0009081 GO:0009407 GO:0009744 GO:0009750	branched-chain amino acid metabolic process; metabolic process; response to fructose stimulus; response to sucrose stimulus; toxin catabolic process	GO:0003824 GO:0004084	branched-chain-amino-acid transaminase activity; catalytic activity	GO:0005737 GO:0005739 GO:0009507	chloroplast; cytoplasm; mitochondrion
Glyma.04G049300	Only K6	up	AT5G06710	homeobox from Arabidopsis thaliana	HD-ZIP	GO:0006355	regulation of transcription, DNA-dependent	GO:0003677 GO:0003700 GO:0043565	DNA binding; sequence-specific DNA binding; sequence-specific DNA binding transcription factor activity	GO:0005634	nucleus
Glyma.04G050200	Only K6	up	AT2G25930	hydroxyproline-rich glycoprotein family protein		GO:0007623 GO:0009409 GO:0009585 GO:0009649 GO:0009733 GO:0009737 GO:0009826 GO:0009909 GO:0010031 GO:0010119 GO:0048573	circadian rhythm; circumnutation; entrainment of circadian clock; photoperiodism, flowering; red, far-red light phototransduction; regulation of flower development; regulation of stomatal movement; response to abscisic acid stimulus; response to auxin stimulus; response to cold; unidimensional cell growth	GO:0003700 GO:0008022	protein C-terminus binding; sequence-specific DNA binding transcription factor activity	GO:0005634	nucleus
Glyma.04G050400	Only JY93	up	AT5G26030	ferrochelatase 1		GO:0006612 GO:0006783 GO:0006944 GO:0006979 GO:0009611 GO:0010363 GO:0019243 GO:0030968 GO:0033014 GO:0043069 GO:0052542	cellular membrane fusion; defense response by callose deposition; endoplasmic reticulum unfolded protein response; heme biosynthetic process; methylglyoxal catabolic process to D-lactate; negative regulation of programmed cell death; protein targeting to membrane; regulation of plant-type hypersensitive response; response to oxidative stress; response to wounding; tetrapyrrole biosynthetic process	GO:0004325	ferrochelatase activity	GO:0005739 GO:0009507 GO:0009536	chloroplast; mitochondrion; plastid
Glyma.04G051800	Only K6	up	AT5G56450	Mitochondrial substrate carrier family protein		GO:0006810 GO:0006839 GO:0048653 GO:0055085	anther development; mitochondrial transport; transmembrane transport; transport	GO:0005215 GO:0005347	ATP transmembrane transporter activity; transporter activity	GO:0005739 GO:0005743	mitochondrial inner membrane; mitochondrion
Glyma.04G051900	Only K6	down	AT4G33040	Thioredoxin superfamily protein		GO:0045454 GO:0048653	anther development; cell redox homeostasis	GO:0009055 GO:0015035	electron carrier activity; protein disulfide oxidoreductase activity	GO:0005737	cytoplasm
Glyma.04G052600	Only K6	down	AT5G11950	Putative lysine decarboxylase family protein		GO:0009089	lysine biosynthetic process via diaminopimelate	GO:0042803	protein homodimerization activity	GO:0005634 GO:0005737 GO:0005829	cytoplasm; cytosol; nucleus
Glyma.04G052800	Only K6	up	AT5G11970	Protein of unknown function (DUF3511)		GO:0008150	biological process	GO:0003674	molecular function	GO:0005886	plasma membrane
Glyma.04G054200	Only JY93	up	AT5G26170	WRKY DNA-binding protein 50	WRKY	GO:0006355 GO:0009867 GO:0050832	defense response to fungus; jasmonic acid mediated signaling pathway; regulation of transcription, DNA-dependent	GO:0003700 GO:0043565	sequence-specific DNA binding; sequence-specific DNA binding transcription factor activity	GO:0005634	nucleus
Glyma.04G054400	Only JY93	up	AT5G12020	17.6 kDa class II heat shock protein		GO:0006457 GO:0009408 GO:0009644 GO:0034976 GO:0042542	protein folding; response to endoplasmic reticulum stress; response to heat; response to high light intensity; response to hydrogen peroxide	NA	NA	GO:0005737	cytoplasm
Glyma.04G057100	Only K6	up	AT1G72510	Protein of unknown function (DUF1677)		GO:0008150	biological process	GO:0003674	molecular function	GO:0005634	nucleus
Glyma.04G058900	Only K6	down	AT5G24930	CONSTANS-like 4	CO-like	GO:0000165 GO:0006355 GO:0006612 GO:0009617 GO:0009862 GO:0009867 GO:0009965 GO:0010310 GO:0010363 GO:0030003 GO:0030154 GO:0031348 GO:0035304 GO:0045893 GO:0070838	MAPK cascade; cell differentiation; cellular cation homeostasis; divalent metal ion transport; jasmonic acid mediated signaling pathway; leaf morphogenesis; negative regulation of defense response; positive regulation of transcription, DNA-dependent; protein targeting to membrane; regulation of hydrogen peroxide metabolic process; regulation of plant-type hypersensitive response; regulation of pr…	GO:0003700 GO:0008270	sequence-specific DNA binding transcription factor activity; zinc ion binding	GO:0005634	nucleus
Glyma.04G060300	Only JY93	down	AT4G31860	Protein phosphatase 2C family protein		GO:0006470 GO:0006499 GO:0009610 GO:0016036 GO:0019375 GO:0042631	N-terminal protein myristoylation; cellular response to phosphate starvation; cellular response to water deprivation; galactolipid biosynthetic process; protein dephosphorylation; response to symbiotic fungus	GO:0003824 GO:0004722	catalytic activity; protein serine/threonine phosphatase activity	GO:0005634 GO:0005886 GO:0008287	nucleus; plasma membrane; protein serine/threonine phosphatase complex
Glyma.04G060600	Only K6	up	AT2G25060	early nodulin-like protein 14		GO:0000226 GO:0000911 GO:0016572	cytokinesis by cell plate formation; histone phosphorylation; microtubule cytoskeleton organization	GO:0005507 GO:0009055	copper ion binding; electron carrier activity	GO:0005576 GO:0005886 GO:0009506 GO:0031225 GO:0046658	anchored to membrane; anchored to plasma membrane; extracellular region; plasma membrane; plasmodesma
Glyma.04G061500	Only K6	down	AT5G25110	CBL-interacting protein kinase 25		GO:0006468 GO:0007165 GO:0050832	defense response to fungus; protein phosphorylation; signal transduction	GO:0004672 GO:0004674 GO:0005524 GO:0016301 GO:0016772	ATP binding; kinase activity; protein kinase activity; protein serine/threonine kinase activity; transferase activity, transferring phosphorus-containing groups	GO:0005886	plasma membrane
Glyma.04G061900	Only JY93	up	AT2G25110	stromal cell-derived factor 2-like protein precursor		GO:0006457 GO:0009408 GO:0009627 GO:0009644 GO:0034976 GO:0042542 GO:0042742 GO:0050832 GO:0052033	defense response to bacterium; defense response to fungus; pathogen-associated molecular pattern dependent induction by symbiont of host innate immune response; protein folding; response to endoplasmic reticulum stress; response to heat; response to high light intensity; response to hydrogen peroxide; systemic acquired resistance	GO:0003674	molecular function	GO:0005783 GO:0009507 GO:0016020	chloroplast; endoplasmic reticulum; membrane
Glyma.04G062900	Only JY93	up	AT5G25190	Integrase-type DNA-binding superfamily protein	ERF	GO:0006355 GO:0009740 GO:0009873 GO:0010162	ethylene mediated signaling pathway; gibberellic acid mediated signaling pathway; regulation of transcription, DNA-dependent; seed dormancy process	GO:0003677 GO:0003700	DNA binding; sequence-specific DNA binding transcription factor activity	GO:0005634	nucleus
Glyma.04G063200	Only K6	up	AT2G25250	NA		GO:0008150	biological process	GO:0003674	molecular function	GO:0005634	nucleus
Glyma.04G064700	Only JY93	down	NA	NA		NA	NA	NA	NA	NA	NA
Glyma.04G065800	Only K6	down	AT5G11160	adenine phosphoribosyltransferase 5		GO:0006168 GO:0009061 GO:0009116 GO:0009117	adenine salvage; anaerobic respiration; nucleoside metabolic process; nucleotide metabolic process	GO:0003999	adenine phosphoribosyltransferase activity	GO:0005737	cytoplasm
Glyma.04G067700	Only JY93	up	AT5G25400	Nucleotide-sugar transporter family protein		GO:0010584	pollen exine formation	GO:0008514	organic anion transmembrane transporter activity	GO:0005886 GO:0016020	membrane; plasma membrane
Glyma.04G073200	Only K6	down	AT2G25690	Protein of unknown function (DUF581)		GO:0008150	biological process	GO:0003674	molecular function	GO:0005634	nucleus
Glyma.04G074500	Only JY93	up	AT5G24850	cryptochrome 3		GO:0006281 GO:0009744 GO:0009813 GO:0010224	DNA repair; flavonoid biosynthetic process; response to UV-B; response to sucrose stimulus	GO:0003677 GO:0003913 GO:0010181	DNA binding; DNA photolyase activity; FMN binding	GO:0005739 GO:0009507	chloroplast; mitochondrion
Glyma.04G075800	Only K6	up	AT5G10695	NA		GO:0006612 GO:0006944 GO:0008150 GO:0010286 GO:0010363 GO:0030968 GO:0043069	biological process; cellular membrane fusion; endoplasmic reticulum unfolded protein response; heat acclimation; negative regulation of programmed cell death; protein targeting to membrane; regulation of plant-type hypersensitive response	NA	NA	GO:0005576 GO:0005739	extracellular region; mitochondrion
Glyma.04G076200	Only K6	up	AT4G31550	WRKY DNA-binding protein 11	WRKY	GO:0002679 GO:0006355 GO:0010200 GO:0035556 GO:0042742	defense response to bacterium; intracellular signal transduction; regulation of transcription, DNA-dependent; respiratory burst involved in defense response; response to chitin	GO:0003700 GO:0005516 GO:0043565	calmodulin binding; sequence-specific DNA binding; sequence-specific DNA binding transcription factor activity	GO:0005634	nucleus
Glyma.04G076900	Only JY93	down	AT4G31240	protein kinase C-like zinc finger protein		GO:0016036 GO:0019375 GO:0045892 GO:0055114	cellular response to phosphate starvation; galactolipid biosynthetic process; negative regulation of transcription, DNA-dependent; oxidation-reduction process	GO:0016209 GO:0016491 GO:0047134	antioxidant activity; oxidoreductase activity; protein-disulfide reductase activity	GO:0005634	nucleus
Glyma.04G079200	Only JY93	down	AT4G32690	hemoglobin 3		GO:0001666 GO:0009733 GO:0015671	oxygen transport; response to auxin stimulus; response to hypoxia	GO:0005344 GO:0005506 GO:0019825 GO:0020037	heme binding; iron ion binding; oxygen binding; oxygen transporter activity	GO:0005886	plasma membrane
Glyma.04G079400	Only JY93	up	AT5G25590	Protein of unknown function (DUF630 and DUF632)		GO:0006306 GO:0006346 GO:0006499 GO:0008356 GO:0009909 GO:0016570 GO:0031047 GO:0031048 GO:0048449 GO:0051567	DNA methylation; N-terminal protein myristoylation; asymmetric cell division; chromatin silencing by small RNA; floral organ formation; gene silencing by RNA; histone H3-K9 methylation; histone modification; methylation-dependent chromatin silencing; regulation of flower development	NA	NA	GO:0005634	nucleus
Glyma.04G083100	Only JY93	down	AT1G67280	Glyoxalase/Bleomycin resistance protein/Dioxygenase superfamily protein		GO:0005975 GO:0009409 GO:0019243	carbohydrate metabolic process; methylglyoxal catabolic process to D-lactate; response to cold	GO:0004462 GO:0046872	lactoylglutathione lyase activity; metal ion binding	GO:0005739 GO:0009507 GO:0009570 GO:0009579 GO:0010319 GO:0031977	chloroplast; chloroplast stroma; mitochondrion; stromule; thylakoid; thylakoid lumen
Glyma.04G083200	Only JY93	down	AT2G25810	tonoplast intrinsic protein 4;1		GO:0006810 GO:0006833 GO:0009736 GO:0055085	cytokinin mediated signaling pathway; transmembrane transport; transport; water transport	GO:0005215 GO:0015250	transporter activity; water channel activity	GO:0005737 GO:0009705 GO:0016020 GO:0016021 GO:0042807	central vacuole; cytoplasm; integral to membrane; membrane; plant-type vacuole membrane
Glyma.04G084000	Only K6	down	AT5G11590	Integrase-type DNA-binding superfamily protein	ERF	GO:0006355 GO:0045893	positive regulation of transcription, DNA-dependent; regulation of transcription, DNA-dependent	GO:0003677 GO:0003700 GO:0043565	DNA binding; sequence-specific DNA binding; sequence-specific DNA binding transcription factor activity	GO:0005634	nucleus
Glyma.04G088800	Only K6	up	AT1G09970	Leucine-rich receptor-like protein kinase family protein		GO:0002237 GO:0006468 GO:0006499 GO:0006612 GO:0006944 GO:0006979 GO:0007165 GO:0007169 GO:0009627 GO:0009845 GO:0010103 GO:0010363 GO:0031347 GO:0043069 GO:0046777 GO:0048443	N-terminal protein myristoylation; cellular membrane fusion; negative regulation of programmed cell death; protein autophosphorylation; protein phosphorylation; protein targeting to membrane; regulation of defense response; regulation of plant-type hypersensitive response; response to molecule of bacterial origin; response to oxidative stress; seed germination; signal transduction; stamen develop…	GO:0004672 GO:0004674 GO:0005524 GO:0016301 GO:0016772	ATP binding; kinase activity; protein kinase activity; protein serine/threonine kinase activity; transferase activity, transferring phosphorus-containing groups	GO:0005886 GO:0070825	micropyle; plasma membrane
Glyma.04G090000	Only K6	down	AT5G65660	hydroxyproline-rich glycoprotein family protein		GO:0008150	biological process	GO:0003674	molecular function	GO:0005634 GO:0005886	nucleus; plasma membrane
Glyma.04G092100	Only K6	up	AT4G24570	dicarboxylate carrier 2		GO:0006810 GO:0006839 GO:0009611 GO:0009612 GO:0009693 GO:0010200 GO:0055085	ethylene biosynthetic process; mitochondrial transport; response to chitin; response to mechanical stimulus; response to wounding; transmembrane transport; transport	GO:0005310	dicarboxylic acid transmembrane transporter activity	GO:0005739 GO:0005743	mitochondrial inner membrane; mitochondrion
Glyma.04G097100	Only K6	down	AT1G12680	phosphoenolpyruvate carboxylase-related kinase 2		GO:0006468	protein phosphorylation	GO:0004672 GO:0004674 GO:0005524 GO:0016301 GO:0016772	ATP binding; kinase activity; protein kinase activity; protein serine/threonine kinase activity; transferase activity, transferring phosphorus-containing groups	GO:0005634	nucleus
Glyma.04G097900	Only JY93	up	AT5G65380	MATE efflux family protein		GO:0006855 GO:0009835 GO:0055085	drug transmembrane transport; fruit ripening; transmembrane transport	GO:0005215 GO:0015238 GO:0015297	antiporter activity; drug transmembrane transporter activity; transporter activity	GO:0005886 GO:0016020	membrane; plasma membrane
Glyma.04G098000	Only K6	up	AT4G40080	ENTH/ANTH/VHS superfamily protein		GO:0008150 GO:0010167 GO:0015706	biological process; nitrate transport; response to nitrate	GO:0005543	phospholipid binding	GO:0005739	mitochondrion
Glyma.04G099200	Only K6	up	AT1G22470	NA		GO:0008150	biological process	GO:0003674	molecular function	GO:0005575	cellular component
Glyma.04G100200	Only K6	up	AT5G64260	EXORDIUM like 2		GO:0008150 GO:0046685	biological process; response to arsenic-containing substance	GO:0003674	molecular function	GO:0005618 GO:0005794 GO:0005829 GO:0009505 GO:0009506 GO:0009507	Golgi apparatus; cell wall; chloroplast; cytosol; plant-type cell wall; plasmodesma
Glyma.04G100300	Only K6	up	AT4G08950	Phosphate-responsive 1 family protein		GO:0009741 GO:0016126	response to brassinosteroid stimulus; sterol biosynthetic process	GO:0003674	molecular function	GO:0005576 GO:0005618 GO:0005794 GO:0009505	Golgi apparatus; cell wall; extracellular region; plant-type cell wall
Glyma.04G103400	Only JY93	up	AT5G65160	tetratricopeptide repeat (TPR)-containing protein		GO:0008150	biological process	NA	NA	NA	NA
Glyma.04G104200	Only K6	down	AT1G78070	Transducin/WD40 repeat-like superfamily protein		GO:0008150	biological process	GO:0003674	molecular function	GO:0005737 GO:0080008	CUL4-RING ubiquitin ligase complex; cytoplasm
Glyma.04G104500	Only JY93	up	AT1G22170	Phosphoglycerate mutase family protein		GO:0006096 GO:0008152	glycolysis; metabolic process	GO:0003824 GO:0016868	catalytic activity; intramolecular transferase activity, phosphotransferases	GO:0009507	chloroplast
Glyma.04G104800	Only K6	down	AT1G22160	Protein of unknown function (DUF581)		GO:0008150	biological process	GO:0003674	molecular function	GO:0005739	mitochondrion
Glyma.04G105500	Only JY93	up	AT1G55020	lipoxygenase 1		GO:0006952 GO:0009611 GO:0009695 GO:0009737 GO:0009753 GO:0009816 GO:0010311 GO:0030397 GO:0034440 GO:0040007 GO:0048364	defense response; defense response to bacterium, incompatible interaction; growth; jasmonic acid biosynthetic process; lateral root formation; lipid oxidation; membrane disassembly; response to abscisic acid stimulus; response to jasmonic acid stimulus; response to wounding; root development	GO:0016165	lipoxygenase activity	GO:0005737 GO:0009536	cytoplasm; plastid
Glyma.04G106500	Only K6	down	AT4G08570	Heavy metal transport/detoxification superfamily protein		GO:0030001	metal ion transport	GO:0046872	metal ion binding	GO:0005575	cellular component
Glyma.04G107500	Only K6	up	AT3G09270	glutathione S-transferase TAU 8		GO:0006635 GO:0009407 GO:0010583 GO:0043161 GO:0046686 GO:0051788 GO:0080129	fatty acid beta-oxidation; proteasomal ubiquitin-dependent protein catabolic process; proteasome core complex assembly; response to cadmium ion; response to cyclopentenone; response to misfolded protein; toxin catabolic process	GO:0004364	glutathione transferase activity	GO:0005737	cytoplasm
Glyma.04G108000	Only K6	up	AT3G54000	CONTAINS InterPro DOMAIN/s: Uncharacterised conserved protein UCP022260 (InterPro:IPR016802); Has 94 Blast hits		GO:0008150	biological process	GO:0003674	molecular function	GO:0005634	nucleus
Glyma.04G110400	Only K6	up	AT4G13310	cytochrome P450, family 71, subfamily A, polypeptide 20		GO:0055114	oxidation-reduction process	GO:0005506 GO:0009055 GO:0016705 GO:0019825 GO:0020037	electron carrier activity; heme binding; iron ion binding; oxidoreductase activity, acting on paired donors, with incorporation or reduction of molecular oxygen; oxygen binding	GO:0009506	plasmodesma
Glyma.04G111300	Only JY93	up	AT1G71380	cellulase 3		GO:0005975	carbohydrate metabolic process	GO:0003824 GO:0004553	catalytic activity; hydrolase activity, hydrolyzing O-glycosyl compounds	GO:0005576 GO:0005618 GO:0005794 GO:0005886 GO:0009505 GO:0009506	Golgi apparatus; cell wall; extracellular region; plant-type cell wall; plasma membrane; plasmodesma
Glyma.04G112500	Only K6	up	AT5G56170	LORELEI-LIKE-GPI-ANCHORED PROTEIN 1		GO:0008150	biological process	GO:0003674	molecular function	GO:0005886 GO:0031225 GO:0090406	anchored to membrane; plasma membrane; pollen tube
Glyma.04G114600	Only JY93	up	NA	NA		NA	NA	NA	NA	NA	NA
Glyma.04G123800	Only JY93	up	AT3G22370	alternative oxidase 1A		GO:0007585 GO:0009409 GO:0031930 GO:0045333 GO:0055114	cellular respiration; mitochondria-nucleus signaling pathway; oxidation-reduction process; respiratory gaseous exchange; response to cold	GO:0009916	alternative oxidase activity	GO:0005739 GO:0005740	mitochondrial envelope; mitochondrion
Glyma.04G129200	Only JY93	up	AT5G04930	aminophospholipid ATPase 1		GO:0006612 GO:0006812 GO:0008152 GO:0009963 GO:0010363 GO:0015914	cation transport; metabolic process; phospholipid transport; positive regulation of flavonoid biosynthetic process; protein targeting to membrane; regulation of plant-type hypersensitive response	GO:0000166 GO:0000287 GO:0003824 GO:0004012 GO:0005515 GO:0005524 GO:0015662 GO:0016820 GO:0046872	ATP binding; ATPase activity, coupled to transmembrane movement of ions, phosphorylative mechanism; catalytic activity; hydrolase activity, acting on acid anhydrides, catalyzing transmembrane movement of substances; magnesium ion binding; metal ion binding; nucleotide binding; phospholipid-translocating ATPase activity; protein binding	GO:0005886 GO:0016020	membrane; plasma membrane
Glyma.04G133400	Only JY93	up	AT3G12320	NA		GO:0007623 GO:0009651 GO:0009737 GO:0010264	circadian rhythm; myo-inositol hexakisphosphate biosynthetic process; response to abscisic acid stimulus; response to salt stress	GO:0003674	molecular function	GO:0005634	nucleus
Glyma.04G134200	Only K6	up	AT3G56710	sigma factor binding protein 1		GO:0000165 GO:0006995 GO:0009627 GO:0009697 GO:0009814 GO:0009816 GO:0009862 GO:0010310 GO:0031347 GO:0031348 GO:0042742 GO:0045088 GO:0050832 GO:0071482	MAPK cascade; cellular response to light stimulus; cellular response to nitrogen starvation; defense response, incompatible interaction; defense response to bacterium; defense response to bacterium, incompatible interaction; defense response to fungus; negative regulation of defense response; regulation of defense response; regulation of hydrogen peroxide metabolic process; regulation of innate i…	GO:0005515	protein binding	GO:0005634 GO:0009507	chloroplast; nucleus
Glyma.04G136200	Only K6	up	AT3G50770	calmodulin-like 41		GO:0008150 GO:0043090	amino acid import; biological process	GO:0005509	calcium ion binding	NA	NA
Glyma.04G137100	Only JY93	up	NA	NA		NA	NA	NA	NA	NA	NA
Glyma.04G137600	Only JY93	up	AT3G57040	response regulator 9		GO:0000160 GO:0006355 GO:0007623 GO:0009735 GO:0009736 GO:0009740 GO:0010162	circadian rhythm; cytokinin mediated signaling pathway; gibberellic acid mediated signaling pathway; phosphorelay signal transduction system; regulation of transcription, DNA-dependent; response to cytokinin stimulus; seed dormancy process	GO:0000156 GO:0005515	phosphorelay response regulator activity; protein binding	GO:0005634	nucleus
Glyma.04G141400	Only K6	down	AT3G54500	NA		GO:0008150	biological process	GO:0003674	molecular function	GO:0005634	nucleus
Glyma.04G142400	Only K6	up	NA	NA		NA	NA	NA	NA	NA	NA
Glyma.04G144900	Only JY93	up	AT1G68710	ATPase E1-E2 type family protein / haloacid dehalogenase-like hydrolase family protein		GO:0006812 GO:0008152 GO:0015914	cation transport; metabolic process; phospholipid transport	GO:0000166 GO:0000287 GO:0003824 GO:0004012 GO:0005524 GO:0015662 GO:0016820 GO:0046872	ATP binding; ATPase activity, coupled to transmembrane movement of ions, phosphorylative mechanism; catalytic activity; hydrolase activity, acting on acid anhydrides, catalyzing transmembrane movement of substances; magnesium ion binding; metal ion binding; nucleotide binding; phospholipid-translocating ATPase activity	GO:0016020 GO:0016021	integral to membrane; membrane
Glyma.04G145700	Only K6	up	AT1G49000	NA		GO:0008150	biological process	GO:0003674	molecular function	GO:0005739	mitochondrion
Glyma.04G150500	Only K6	up	AT1G14920	GRAS family transcription factor family protein	GRAS	GO:0006808 GO:0009651 GO:0009723 GO:0009737 GO:0009739 GO:0009740 GO:0009845 GO:0009863 GO:0009867 GO:0009938 GO:0010029 GO:0010162 GO:0010187 GO:0010218 GO:0010233 GO:0010325 GO:0042538 GO:0048444 GO:2000033 GO:2000377	floral organ morphogenesis; gibberellic acid mediated signaling pathway; hyperosmotic salinity response; jasmonic acid mediated signaling pathway; negative regulation of gibberellic acid mediated signaling pathway; negative regulation of seed germination; phloem transport; raffinose family oligosaccharide biosynthetic process; regulation of nitrogen utilization; regulation of reactive oxygen spec…	GO:0003700 GO:0005515	protein binding; sequence-specific DNA binding transcription factor activity	GO:0005634	nucleus
Glyma.04G152400	Only K6	down	AT3G18550	TCP family transcription factor	TCP	GO:0006355 GO:2000032	regulation of secondary shoot formation; regulation of transcription, DNA-dependent	GO:0003700	sequence-specific DNA binding transcription factor activity	GO:0005634	nucleus
Glyma.04G153400	Only K6	up	AT2G01150	RING-H2 finger protein 2B		GO:0080167	response to karrikin	GO:0004842 GO:0008270	ubiquitin-protein ligase activity; zinc ion binding	NA	NA
Glyma.04G153500	Only JY93	up	AT2G47560	RING/U-box superfamily protein		NA	NA	GO:0008270	zinc ion binding	GO:0005634	nucleus
Glyma.04G155400	Only K6	up	AT5G57830	Protein of unknown function, DUF593		GO:0008150	biological process	GO:0003674	molecular function	GO:0005634	nucleus
Glyma.04G160100	Only JY93	up	AT5G60920	COBRA-like extracellular glycosyl-phosphatidyl inositol-anchored protein family		GO:0000271 GO:0000272 GO:0005982 GO:0006096 GO:0006816 GO:0006833 GO:0006972 GO:0007030 GO:0007389 GO:0008361 GO:0009266 GO:0009651 GO:0009664 GO:0009750 GO:0009825 GO:0009832 GO:0009926 GO:0009932 GO:0010015 GO:0010215 GO:0010817 GO:0016049 GO:0030243 GO:0040007 GO:0043481 GO:0046686 GO:0048767 GO:0071555	Golgi organization; anthocyanin accumulation in tissues in response to UV light; auxin polar transport; calcium ion transport; cell growth; cell tip growth; cell wall organization; cellulose metabolic process; cellulose microfibril organization; glycolysis; growth; hyperosmotic response; multidimensional cell growth; pattern specification process; plant-type cell wall biogenesis; plant-type cell …	GO:0003674	molecular function	GO:0005886 GO:0009505 GO:0009897 GO:0009930 GO:0031225 GO:0046658	anchored to membrane; anchored to plasma membrane; external side of plasma membrane; longitudinal side of cell surface; plant-type cell wall; plasma membrane
Glyma.04G161000	Only K6	down	AT1G74160	NA		GO:0008150 GO:0010075	biological process; regulation of meristem growth	GO:0003674	molecular function	GO:0005634 GO:0009506	nucleus; plasmodesma
Glyma.04G162400	Only K6	up	AT5G61010	exocyst subunit exo70 family protein E2		GO:0002237 GO:0006887 GO:0006904 GO:0009627 GO:0009697	exocytosis; response to molecule of bacterial origin; salicylic acid biosynthetic process; systemic acquired resistance; vesicle docking involved in exocytosis	GO:0005515	protein binding	GO:0000145 GO:0005634 GO:0005829 GO:0070062	cytosol; exocyst; extracellular vesicular exosome; nucleus
Glyma.04G164400	Only K6	up	AT5G61210	soluble N-ethylmaleimide-sensitive factor adaptor protein 33		GO:0000165 GO:0000910 GO:0000911 GO:0002679 GO:0006499 GO:0006612 GO:0006820 GO:0006862 GO:0006888 GO:0006944 GO:0009595 GO:0009611 GO:0009612 GO:0009620 GO:0009625 GO:0009627 GO:0009695 GO:0009697 GO:0009737 GO:0009753 GO:0009862 GO:0009863 GO:0009867 GO:0010200 GO:0010310 GO:0010363 GO:0015696 GO:0015802 GO:0016192 GO:0030968 GO:0031348 GO:0042742 GO:0043069 GO:0043090 GO:0043269 GO:0043900 GO:…	ER to Golgi vesicle-mediated transport; MAPK cascade; N-terminal protein myristoylation; amino acid import; ammonium transport; anion transport; basic amino acid transport; cellular membrane fusion; cytokinesis; cytokinesis by cell plate formation; defense response to bacterium; defense response to fungus; detection of biotic stimulus; endoplasmic reticulum unfolded protein response; innate immun…	GO:0005484 GO:0005515	SNAP receptor activity; protein binding	GO:0005634 GO:0005886 GO:0009504 GO:0009507 GO:0016021	cell plate; chloroplast; integral to membrane; nucleus; plasma membrane
Glyma.04G165000	Only K6	up	AT5G07800	Flavin-binding monooxygenase family protein		GO:0042744 GO:0055114	hydrogen peroxide catabolic process; oxidation-reduction process	GO:0004497 GO:0004499 GO:0050660 GO:0050661	N,N-dimethylaniline monooxygenase activity; NADP binding; flavin adenine dinucleotide binding; monooxygenase activity	GO:0005634	nucleus
Glyma.04G165900	Only JY93	up	AT1G18660	zinc finger (C3HC4-type RING finger) family protein		GO:0006508 GO:0019288	isopentenyl diphosphate biosynthetic process, mevalonate-independent pathway; proteolysis	GO:0004176 GO:0008270	ATP-dependent peptidase activity; zinc ion binding	GO:0005634	nucleus
Glyma.04G167500	Only K6	up	AT1G08570	atypical CYS HIS rich thioredoxin 4		GO:0006662 GO:0045454	cell redox homeostasis; glycerol ether metabolic process	GO:0009055 GO:0015035 GO:0016671	electron carrier activity; oxidoreductase activity, acting on a sulfur group of donors, disulfide as acceptor; protein disulfide oxidoreductase activity	GO:0009507 GO:0009570 GO:0031969	chloroplast; chloroplast membrane; chloroplast stroma
Glyma.04G176900	Only K6	down	AT1G59640	BIG PETAL P	bHLH	GO:0006355 GO:0009062 GO:0009694 GO:0009753 GO:0009827 GO:0009860 GO:0010162 GO:0048441 GO:0048443 GO:0048446 GO:0048481	fatty acid catabolic process; jasmonic acid metabolic process; ovule development; petal development; petal morphogenesis; plant-type cell wall modification; pollen tube growth; regulation of transcription, DNA-dependent; response to jasmonic acid stimulus; seed dormancy process; stamen development	GO:0003677 GO:0003700	DNA binding; sequence-specific DNA binding transcription factor activity	GO:0005634	nucleus
Glyma.04G177900	Only K6	up	AT5G62920	response regulator 6		GO:0000160 GO:0006355 GO:0007623 GO:0009735 GO:0009736	circadian rhythm; cytokinin mediated signaling pathway; phosphorelay signal transduction system; regulation of transcription, DNA-dependent; response to cytokinin stimulus	GO:0000156 GO:0005515	phosphorelay response regulator activity; protein binding	GO:0005634	nucleus
Glyma.04G179600	Only JY93	up	NA	NA		NA	NA	NA	NA	NA	NA
Glyma.04G179900	Only K6	down	AT5G50090	NA		GO:0006499	N-terminal protein myristoylation	GO:0003674	molecular function	GO:0005634	nucleus
Glyma.04G180400	Only JY93	up	AT5G25610	BURP domain-containing protein		GO:0009269 GO:0009409 GO:0009651 GO:0009737	response to abscisic acid stimulus; response to cold; response to desiccation; response to salt stress	GO:0045735	nutrient reservoir activity	GO:0005576 GO:0005768 GO:0005794 GO:0005802	Golgi apparatus; endosome; extracellular region; trans-Golgi network
Glyma.04G180800	Only JY93	down	AT5G62865	NA		NA	NA	NA	NA	GO:0005634	nucleus
Glyma.04G180900	Only JY93	up	AT1G23870	trehalose-phosphatase/synthase 9		GO:0005992 GO:0008152 GO:0009744 GO:0009750	metabolic process; response to fructose stimulus; response to sucrose stimulus; trehalose biosynthetic process	GO:0003824 GO:0004805 GO:0016757	catalytic activity; transferase activity, transferring glycosyl groups; trehalose-phosphatase activity	GO:0005634	nucleus
Glyma.04G181300	Only JY93	down	AT1G23980	RING/U-box superfamily protein		NA	NA	GO:0008270	zinc ion binding	GO:0005634	nucleus
Glyma.04G181500	Only K6	down	AT1G62400	Protein kinase superfamily protein		GO:0006468 GO:0010119	protein phosphorylation; regulation of stomatal movement	GO:0004672 GO:0004674 GO:0004712 GO:0004713 GO:0005524 GO:0016301 GO:0016772	ATP binding; kinase activity; protein kinase activity; protein serine/threonine/tyrosine kinase activity; protein serine/threonine kinase activity; protein tyrosine kinase activity; transferase activity, transferring phosphorus-containing groups	GO:0005634	nucleus
Glyma.04G184400	Only K6	up	AT1G06110	SKP1/ASK-interacting protein 16		GO:0008150 GO:0019243	biological process; methylglyoxal catabolic process to D-lactate	GO:0005515	protein binding	GO:0005634 GO:0019005	SCF ubiquitin ligase complex; nucleus
Glyma.04G184500	Only JY93	up	AT5G62960	NA		GO:0008150	biological process	GO:0003674	molecular function	GO:0009507	chloroplast
Glyma.04G185700	Only JY93	down	AT5G63050	embryo defective 2759		GO:0009793	embryo development ending in seed dormancy	GO:0003674	molecular function	GO:0009507	chloroplast
Glyma.04G188200	Only JY93	up	AT5G50180	Protein kinase superfamily protein		GO:0006468 GO:0007020	microtubule nucleation; protein phosphorylation	GO:0004672 GO:0004674 GO:0004712 GO:0005524 GO:0016301 GO:0016772	ATP binding; kinase activity; protein kinase activity; protein serine/threonine/tyrosine kinase activity; protein serine/threonine kinase activity; transferase activity, transferring phosphorus-containing groups	NA	NA
Glyma.04G188900	Only JY93	down	AT4G12690	Plant protein of unknown function (DUF868)		GO:0008150 GO:0009744 GO:0009750	biological process; response to fructose stimulus; response to sucrose stimulus	GO:0003674	molecular function	GO:0005634 GO:0009506	nucleus; plasmodesma
Glyma.04G189700	Only JY93	down	AT2G45570	cytochrome P450, family 76, subfamily C, polypeptide 2		GO:0016036 GO:0019375 GO:0042631 GO:0055114	cellular response to phosphate starvation; cellular response to water deprivation; galactolipid biosynthetic process; oxidation-reduction process	GO:0005506 GO:0009055 GO:0016705 GO:0019825 GO:0020037	electron carrier activity; heme binding; iron ion binding; oxidoreductase activity, acting on paired donors, with incorporation or reduction of molecular oxygen; oxygen binding	GO:0005576	extracellular region
Glyma.04G190400	Only K6	up	AT2G31880	Leucine-rich repeat protein kinase family protein		GO:0006468 GO:0007169 GO:0010942 GO:0031349 GO:0060862	negative regulation of floral organ abscission; positive regulation of cell death; positive regulation of defense response; protein phosphorylation; transmembrane receptor protein tyrosine kinase signaling pathway	GO:0004672 GO:0004674 GO:0004713 GO:0005524 GO:0016301 GO:0016772	ATP binding; kinase activity; protein kinase activity; protein serine/threonine kinase activity; protein tyrosine kinase activity; transferase activity, transferring phosphorus-containing groups	GO:0005886	plasma membrane
Glyma.04G194800	Only K6	up	AT1G76650	calmodulin-like 38		GO:0009611 GO:0009620 GO:0009695 GO:0009723 GO:0009738 GO:0009753 GO:0009873 GO:0010200 GO:0035556	abscisic acid mediated signaling pathway; ethylene mediated signaling pathway; intracellular signal transduction; jasmonic acid biosynthetic process; response to chitin; response to ethylene stimulus; response to fungus; response to jasmonic acid stimulus; response to wounding	GO:0005509	calcium ion binding	GO:0005634 GO:0005886	nucleus; plasma membrane
Glyma.04G195200	Only JY93	up	AT5G14170	SWIB/MDM2 domain superfamily protein		GO:0000956 GO:0006281 GO:0008284 GO:0010224 GO:0048364	DNA repair; nuclear-transcribed mRNA catabolic process; positive regulation of cell proliferation; response to UV-B; root development	GO:0003674	molecular function	GO:0005634	nucleus
Glyma.04G196400	Only JY93	down	AT3G01930	Major facilitator superfamily protein		NA	NA	NA	NA	GO:0005886	plasma membrane
Glyma.04G198000	Only K6	up	AT5G41040	HXXXD-type acyl-transferase family protein		GO:0010167 GO:0010345 GO:0015706 GO:0052325	cell wall pectin biosynthetic process; nitrate transport; response to nitrate; suberin biosynthetic process	GO:0016740 GO:0016747 GO:0050734	hydroxycinnamoyltransferase activity; transferase activity; transferase activity, transferring acyl groups other than amino-acyl groups	GO:0005737	cytoplasm
Glyma.04G199900	Only K6	up	AT5G50915	basic helix-loop-helix (bHLH) DNA-binding superfamily protein	bHLH	GO:0009739	response to gibberellin stimulus	GO:0003677 GO:0003700	DNA binding; sequence-specific DNA binding transcription factor activity	GO:0005634	nucleus
Glyma.04G200400	Only JY93	down	AT5G50920	CLPC homologue 1		GO:0006289 GO:0009658 GO:0009902 GO:0010027 GO:0010304 GO:0010380 GO:0019538 GO:0034660 GO:0042744 GO:0042793 GO:0045036 GO:0045037	PSII associated light-harvesting complex II catabolic process; chloroplast organization; chloroplast relocation; hydrogen peroxide catabolic process; ncRNA metabolic process; nucleotide-excision repair; protein import into chloroplast stroma; protein metabolic process; protein targeting to chloroplast; regulation of chlorophyll biosynthetic process; thylakoid membrane organization; transcription …	GO:0000166 GO:0003677 GO:0004176 GO:0004518 GO:0005524 GO:0016887 GO:0017111	ATP-dependent peptidase activity; ATP binding; ATPase activity; DNA binding; nuclease activity; nucleoside-triphosphatase activity; nucleotide binding	GO:0005618 GO:0005739 GO:0009507 GO:0009532 GO:0009535 GO:0009536 GO:0009570 GO:0009706 GO:0009941 GO:0031897	Tic complex; cell wall; chloroplast; chloroplast envelope; chloroplast inner membrane; chloroplast stroma; chloroplast thylakoid membrane; mitochondrion; plastid; plastid stroma
Glyma.04G200500	Only K6	up	AT3G26744	basic helix-loop-helix (bHLH) DNA-binding superfamily protein	bHLH	GO:0006355 GO:0009409 GO:0009410 GO:0009640 GO:0009793 GO:0009845 GO:0009909 GO:0009933 GO:0010162 GO:0010182 GO:0010228 GO:0010388 GO:0010440 GO:0016567 GO:0016571 GO:0016579 GO:0019915 GO:0043687 GO:0045893 GO:0048522 GO:0050826	cullin deneddylation; embryo development ending in seed dormancy; histone methylation; lipid storage; meristem structural organization; photomorphogenesis; positive regulation of cellular process; positive regulation of transcription, DNA-dependent; post-translational protein modification; protein deubiquitination; protein ubiquitination; regulation of flower development; regulation of transcript…	GO:0003677 GO:0003700	DNA binding; sequence-specific DNA binding transcription factor activity	GO:0005634	nucleus
Glyma.04G203100	Only K6	up	AT3G59880	NA		GO:0008150	biological process	GO:0003674	molecular function	GO:0005739 GO:0005886	mitochondrion; plasma membrane
Glyma.04G205300	Only K6	down	AT1G72160	Sec14p-like phosphatidylinositol transfer family protein		GO:0006810	transport	GO:0005215	transporter activity	GO:0005634 GO:0005886 GO:0016021	integral to membrane; nucleus; plasma membrane
Glyma.04G206700	Only K6	up	AT2G03200	Eukaryotic aspartyl protease family protein		GO:0000041 GO:0006508 GO:0010228 GO:0010413 GO:0016926 GO:0045492 GO:0050665	glucuronoxylan metabolic process; hydrogen peroxide biosynthetic process; protein desumoylation; proteolysis; transition metal ion transport; vegetative to reproductive phase transition of meristem; xylan biosynthetic process	GO:0004190	aspartic-type endopeptidase activity	GO:0005576	extracellular region
Glyma.04G211700	Only K6	up	AT2G13600	Pentatricopeptide repeat (PPR) superfamily protein		GO:0010182 GO:0080156	mitochondrial mRNA modification; sugar mediated signaling pathway	GO:0003674	molecular function	GO:0005739	mitochondrion
Glyma.04G214600	Only JY93	up	AT5G09790	ARABIDOPSIS TRITHORAX-RELATED PROTEIN 5		GO:0006275 GO:0006355 GO:0009294 GO:0009555 GO:0051726 GO:0070734	DNA mediated transformation; histone H3-K27 methylation; pollen development; regulation of DNA replication; regulation of cell cycle; regulation of transcription, DNA-dependent	GO:0003677 GO:0005515 GO:0008270 GO:0046976	DNA binding; histone methyltransferase activity (H3-K27 specific); protein binding; zinc ion binding	GO:0005634 GO:0009507	chloroplast; nucleus
Glyma.04G215500	Only JY93	up	AT1G49180	protein kinase family protein		GO:0006468	protein phosphorylation	GO:0003676 GO:0004672 GO:0004674 GO:0004713 GO:0005524 GO:0016301 GO:0016772	ATP binding; kinase activity; nucleic acid binding; protein kinase activity; protein serine/threonine kinase activity; protein tyrosine kinase activity; transferase activity, transferring phosphorus-containing groups	GO:0005575	cellular component
Glyma.04G215800	Only JY93	up	AT5G64040	photosystem I reaction center subunit PSI-N, chloroplast, putative / PSI-N, putative (PSAN)		GO:0006098 GO:0009773 GO:0015979 GO:0019344 GO:0019684 GO:0035304	cysteine biosynthetic process; pentose-phosphate shunt; photosynthesis; photosynthesis, light reaction; photosynthetic electron transport in photosystem I; regulation of protein dephosphorylation	GO:0005516	calmodulin binding	GO:0009507 GO:0009522 GO:0009534 GO:0009535 GO:0009543 GO:0009579 GO:0030093 GO:0042651	chloroplast; chloroplast photosystem I; chloroplast thylakoid; chloroplast thylakoid lumen; chloroplast thylakoid membrane; photosystem I; thylakoid; thylakoid membrane
Glyma.04G217800	Only K6	down	AT5G64770	Encodes a root meristem growth factor (RGF). Belongs to a family of functionally redundant homologous pepti		GO:0008284 GO:0009958 GO:0022622 GO:0030154 GO:0032880 GO:0048527 GO:2000012	cell differentiation; lateral root development; positive gravitropism; positive regulation of cell proliferation; regulation of auxin polar transport; regulation of protein localization; root system development	GO:0003674 GO:0008083	growth factor activity; molecular function	GO:0005615 GO:0005739	extracellular space; mitochondrion
Glyma.04G218700	Only JY93	up	AT5G64810	WRKY DNA-binding protein 51	WRKY	GO:0006355 GO:0009867 GO:0042742 GO:0050832	defense response to bacterium; defense response to fungus; jasmonic acid mediated signaling pathway; regulation of transcription, DNA-dependent	GO:0003700 GO:0043565	sequence-specific DNA binding; sequence-specific DNA binding transcription factor activity	GO:0005634	nucleus
Glyma.04G220600	Only JY93	up	AT5G05340	Peroxidase superfamily protein		GO:0006979 GO:0055114	oxidation-reduction process; response to oxidative stress	GO:0004601 GO:0005515 GO:0020037	heme binding; peroxidase activity; protein binding	GO:0005576 GO:0005618 GO:0005794 GO:0005829 GO:0048046	Golgi apparatus; apoplast; cell wall; cytosol; extracellular region
Glyma.04G220900	Only K6	up	AT3G10940	dual specificity protein phosphatase (DsPTP1) family protein		GO:0000023 GO:0005983 GO:0006470 GO:0019252 GO:0043085	maltose metabolic process; positive regulation of catalytic activity; protein dephosphorylation; starch biosynthetic process; starch catabolic process	GO:0008138 GO:0019203 GO:0050308 GO:2001070	carbohydrate phosphatase activity; protein tyrosine/serine/threonine phosphatase activity; starch binding; sugar-phosphatase activity	GO:0005737 GO:0009507	chloroplast; cytoplasm
Glyma.04G222000	Only K6	down	AT2G40550	E2F target gene 1		GO:0000278 GO:0000724 GO:0006260 GO:0006261 GO:0006270 GO:0006275 GO:0006301 GO:0006306 GO:0007062 GO:0008283 GO:0009555 GO:0010090 GO:0016444 GO:0016568 GO:0031047 GO:0042023 GO:0051302 GO:0051567 GO:0051726	DNA-dependent DNA replication; DNA endoreduplication; DNA methylation; DNA replication; DNA replication initiation; cell proliferation; chromatin modification; double-strand break repair via homologous recombination; gene silencing by RNA; histone H3-K9 methylation; mitotic cell cycle; pollen development; postreplication repair; regulation of DNA replication; regulation of cell cycle; regulation …	GO:0005515	protein binding	GO:0005634 GO:0009941 GO:0042555 GO:0043601	MCM complex; chloroplast envelope; nuclear replisome; nucleus
Glyma.04G222500	Only K6	down	AT5G05250	NA		GO:0008150	biological process	GO:0003674	molecular function	NA	NA
Glyma.04G223300	Only K6	up	AT3G56400	WRKY DNA-binding protein 70	WRKY	GO:0000165 GO:0001666 GO:0002679 GO:0006355 GO:0006612 GO:0006944 GO:0009409 GO:0009595 GO:0009617 GO:0009625 GO:0009627 GO:0009697 GO:0009751 GO:0009753 GO:0009759 GO:0009814 GO:0009862 GO:0009863 GO:0009864 GO:0009867 GO:0010120 GO:0010200 GO:0010310 GO:0010363 GO:0019684 GO:0031347 GO:0031348 GO:0035304 GO:0042742 GO:0043069 GO:0043900 GO:0045088 GO:0045892 GO:0050832 GO:0051707 GO:1900056	MAPK cascade; camalexin biosynthetic process; cellular membrane fusion; defense response, incompatible interaction; defense response to bacterium; defense response to fungus; detection of biotic stimulus; indole glucosinolate biosynthetic process; induced systemic resistance, jasmonic acid mediated signaling pathway; jasmonic acid mediated signaling pathway; negative regulation of defense respons…	GO:0003700 GO:0005515 GO:0043565	protein binding; sequence-specific DNA binding; sequence-specific DNA binding transcription factor activity	GO:0005634	nucleus
Glyma.04G226000	Only JY93	down	NA	NA		NA	NA	NA	NA	NA	NA
Glyma.04G227700	Only JY93	up	AT5G54160	O-methyltransferase 1		GO:0006598 GO:0009611 GO:0009698 GO:0009805 GO:0009809 GO:0009963 GO:0016126 GO:0042398 GO:0051555	cellular modified amino acid biosynthetic process; coumarin biosynthetic process; flavonol biosynthetic process; lignin biosynthetic process; phenylpropanoid metabolic process; polyamine catabolic process; positive regulation of flavonoid biosynthetic process; response to wounding; sterol biosynthetic process	GO:0030744 GO:0030755 GO:0033799 GO:0047763	caffeate O-methyltransferase activity; luteolin O-methyltransferase activity; myricetin 3'-O-methyltransferase activity; quercetin 3-O-methyltransferase activity	GO:0005634 GO:0005737 GO:0005829 GO:0005886 GO:0009506	cytoplasm; cytosol; nucleus; plasma membrane; plasmodesma
Glyma.04G228300	Only K6	up	AT5G24470	pseudo-response regulator 5		GO:0000160 GO:0005982 GO:0006355 GO:0007623 GO:0009639 GO:0009640 GO:0010114 GO:0010218 GO:0042752 GO:0045892 GO:0048574 GO:0051170	circadian rhythm; long-day photoperiodism, flowering; negative regulation of transcription, DNA-dependent; nuclear import; phosphorelay signal transduction system; photomorphogenesis; regulation of circadian rhythm; regulation of transcription, DNA-dependent; response to far red light; response to red light; response to red or far red light; starch metabolic process	GO:0000156 GO:0003677	DNA binding; phosphorelay response regulator activity	GO:0005634	nucleus
Glyma.04G228700	Only K6	up	AT1G64720	Polyketide cyclase/dehydrase and lipid transport superfamily protein		GO:0008150	biological process	GO:0003674	molecular function	GO:0005739 GO:0005773	mitochondrion; vacuole
Glyma.04G228900	Only K6	up	AT5G54165	NA		GO:0008150	biological process	GO:0003674	molecular function	GO:0009507	chloroplast
Glyma.04G229700	Only K6	up	AT5G03890	NA		GO:0006499	N-terminal protein myristoylation	NA	NA	GO:0005634	nucleus
Glyma.04G229800	Only K6	up	AT4G27670	heat shock protein 21		GO:0006457 GO:0009408 GO:0009644 GO:0010286 GO:0042542	heat acclimation; protein folding; response to heat; response to high light intensity; response to hydrogen peroxide	NA	NA	GO:0009507	chloroplast
Glyma.04G229900	Only JY93	up	NA	NA		NA	NA	NA	NA	NA	NA
Glyma.04G230400	Only JY93	up	NA	NA		NA	NA	NA	NA	NA	NA
Glyma.04G230600	Only JY93	up	AT5G53660	growth-regulating factor 7	GRF	GO:0006355 GO:0010114 GO:0010218 GO:0048366 GO:0080167	leaf development; regulation of transcription, DNA-dependent; response to far red light; response to karrikin; response to red light	GO:0005524 GO:0016818	ATP binding; hydrolase activity, acting on acid anhydrides, in phosphorus-containing anhydrides	GO:0005634	nucleus
Glyma.04G232200	Only JY93	up	AT2G46620	P-loop containing nucleoside triphosphate hydrolases superfamily protein		GO:0009693	ethylene biosynthetic process	GO:0000166 GO:0005524 GO:0016887 GO:0017111	ATP binding; ATPase activity; nucleoside-triphosphatase activity; nucleotide binding	GO:0005886	plasma membrane
Glyma.04G233100	Only JY93	down	AT1G21320	nucleotide binding;nucleic acid binding		GO:0008150	biological process	GO:0000166 GO:0003676	nucleic acid binding; nucleotide binding	GO:0005634	nucleus
Glyma.04G233300	Only K6	up	AT3G61850	Dof-type zinc finger DNA-binding family protein	Dof	GO:0006355 GO:0009639 GO:0009845	regulation of transcription, DNA-dependent; response to red or far red light; seed germination	GO:0003677 GO:0003700 GO:0008270	DNA binding; sequence-specific DNA binding transcription factor activity; zinc ion binding	GO:0005634	nucleus
Glyma.04G238600	Only JY93	up	AT4G27940	manganese tracking factor for mitochondrial SOD2		GO:0006810 GO:0006839 GO:1901562	mitochondrial transport; response to paraquat; transport	GO:0016530	metallochaperone activity	GO:0005739 GO:0005743	mitochondrial inner membrane; mitochondrion
Glyma.04G238900	Only K6	up	AT5G53310	myosin heavy chain-related		GO:0006623 GO:0006944 GO:0010200 GO:0016192 GO:0048193	Golgi vesicle transport; cellular membrane fusion; protein targeting to vacuole; response to chitin; vesicle-mediated transport	GO:0003774	motor activity	GO:0005737 GO:0005886	cytoplasm; plasma membrane
Glyma.04G239000	Only K6	up	AT4G23740	Leucine-rich repeat protein kinase family protein		GO:0006468 GO:0007169 GO:0010075	protein phosphorylation; regulation of meristem growth; transmembrane receptor protein tyrosine kinase signaling pathway	GO:0004672 GO:0004674 GO:0004713 GO:0005524 GO:0016301 GO:0016772	ATP binding; kinase activity; protein kinase activity; protein serine/threonine kinase activity; protein tyrosine kinase activity; transferase activity, transferring phosphorus-containing groups	GO:0005886	plasma membrane
Glyma.04G244600	Only K6	up	NA	NA		NA	NA	NA	NA	NA	NA
Glyma.04G245000	Only K6	up	AT1G21550	Calcium-binding EF-hand family protein		GO:0008150	biological process	GO:0005509	calcium ion binding	GO:0005737	cytoplasm
Glyma.04G246900	Only JY93	up	AT1G77400	NA		GO:0008150	biological process	GO:0003674	molecular function	GO:0005634	nucleus
Glyma.04G247600	Only K6	up	AT1G44350	IAA-leucine resistant (ILR)-like gene 6		GO:0006508 GO:0008152 GO:0009611 GO:0009620 GO:0009694 GO:0009695 GO:0009753 GO:0009850 GO:0010112	auxin metabolic process; jasmonic acid biosynthetic process; jasmonic acid metabolic process; metabolic process; proteolysis; regulation of systemic acquired resistance; response to fungus; response to jasmonic acid stimulus; response to wounding	GO:0008237 GO:0010178 GO:0016787	IAA-amino acid conjugate hydrolase activity; hydrolase activity; metallopeptidase activity	GO:0005576	extracellular region
Glyma.04G248100	Only K6	up	AT1G21740	Protein of unknown function (DUF630 and DUF632)		GO:0006499	N-terminal protein myristoylation	NA	NA	GO:0005634	nucleus
Glyma.04G249000	Only K6	up	AT1G01720	NAC (No Apical Meristem) domain transcriptional regulator superfamily protein	NAC	GO:0006355 GO:0007275 GO:0009414 GO:0009611 GO:0009620 GO:0009695 GO:0009737 GO:0009753 GO:0009788 GO:0010200 GO:0042538	hyperosmotic salinity response; jasmonic acid biosynthetic process; multicellular organismal development; negative regulation of abscisic acid mediated signaling pathway; regulation of transcription, DNA-dependent; response to abscisic acid stimulus; response to chitin; response to fungus; response to jasmonic acid stimulus; response to water deprivation; response to wounding	GO:0003677 GO:0003700	DNA binding; sequence-specific DNA binding transcription factor activity	GO:0005634	nucleus
Glyma.04G250200	Only K6	down	AT1G77620	P-loop containing nucleoside triphosphate hydrolases superfamily protein		GO:0006281	DNA repair	GO:0000166 GO:0017111	nucleoside-triphosphatase activity; nucleotide binding	GO:0005634 GO:0005886	nucleus; plasma membrane
Glyma.04G251000	Only JY93	down	AT4G08290	nodulin MtN21 /EamA-like transporter family protein		NA	NA	NA	NA	GO:0005576 GO:0016020	extracellular region; membrane
Glyma.04G253100	Only K6	down	AT1G21980	phosphatidylinositol-4-phosphate 5-kinase 1		GO:0046488	phosphatidylinositol metabolic process	GO:0003785 GO:0005524 GO:0016307 GO:0016308 GO:0051015	1-phosphatidylinositol-4-phosphate 5-kinase activity; ATP binding; actin filament binding; actin monomer binding; phosphatidylinositol phosphate kinase activity	GO:0005634 GO:0005886	nucleus; plasma membrane
Glyma.04G255400	Only K6	up	AT4G24000	cellulose synthase like G2		GO:0000271 GO:0030244	cellulose biosynthetic process; polysaccharide biosynthetic process	GO:0016740 GO:0016757 GO:0016759 GO:0016760	cellulose synthase (UDP-forming) activity; cellulose synthase activity; transferase activity; transferase activity, transferring glycosyl groups	GO:0005794 GO:0016020	Golgi apparatus; membrane
Glyma.05G001500	Only K6	up	AT3G03280	NA		GO:0006499	N-terminal protein myristoylation	GO:0003674	molecular function	GO:0005634	nucleus
Glyma.05G001700	Only JY93	up	AT1G71140	MATE efflux family protein		GO:0006855 GO:0055085	drug transmembrane transport; transmembrane transport	GO:0005215 GO:0015238 GO:0015297	antiporter activity; drug transmembrane transporter activity; transporter activity	GO:0005774 GO:0005886 GO:0016020	membrane; plasma membrane; vacuolar membrane
Glyma.05G002000	Only K6	down	AT1G66840	Plant protein of unknown function (DUF827)		GO:0009637 GO:0009903 GO:0009904	chloroplast accumulation movement; chloroplast avoidance movement; response to blue light	GO:0005515	protein binding	GO:0005829	cytosol
Glyma.05G002200	Only K6	up	AT3G18280	Bifunctional inhibitor/lipid-transfer protein/seed storage 2S albumin superfamily protein		GO:0006612 GO:0006869 GO:0009963 GO:0010363	lipid transport; positive regulation of flavonoid biosynthetic process; protein targeting to membrane; regulation of plant-type hypersensitive response	GO:0008289	lipid binding	GO:0005576	extracellular region
Glyma.05G003200	Only K6	down	AT2G23180	cytochrome P450, family 96, subfamily A, polypeptide 1		GO:0055114	oxidation-reduction process	GO:0005506 GO:0009055 GO:0016705 GO:0019825 GO:0020037	electron carrier activity; heme binding; iron ion binding; oxidoreductase activity, acting on paired donors, with incorporation or reduction of molecular oxygen; oxygen binding	GO:0005576	extracellular region
Glyma.05G003900	Only JY93	up	AT5G40390	Raffinose synthase family protein		GO:0005986 GO:0006979 GO:0009414 GO:0009737 GO:0010325 GO:0019593	mannitol biosynthetic process; raffinose family oligosaccharide biosynthetic process; response to abscisic acid stimulus; response to oxidative stress; response to water deprivation; sucrose biosynthetic process	GO:0004553 GO:0047274	galactinol-sucrose galactosyltransferase activity; hydrolase activity, hydrolyzing O-glycosyl compounds	GO:0005737 GO:0009507	chloroplast; cytoplasm
Glyma.05G004600	Only JY93	up	AT3G27640	Transducin/WD40 repeat-like superfamily protein		GO:0006261 GO:0008150	DNA-dependent DNA replication; biological process	GO:0000166	nucleotide binding	GO:0005634 GO:0080008	CUL4-RING ubiquitin ligase complex; nucleus
Glyma.05G008400	Only K6	up	AT3G19360	Zinc finger (CCCH-type) family protein	C3H	GO:0006355 GO:0043687 GO:0045893	positive regulation of transcription, DNA-dependent; post-translational protein modification; regulation of transcription, DNA-dependent	GO:0003676 GO:0003700 GO:0008270	nucleic acid binding; sequence-specific DNA binding transcription factor activity; zinc ion binding	GO:0005634	nucleus
Glyma.05G008900	Only JY93	up	AT5G25940	early nodulin-related		GO:0009723	response to ethylene stimulus	GO:0003674	molecular function	GO:0005739	mitochondrion
Glyma.05G010500	Only K6	up	AT1G52720	NA		GO:0008150	biological process	GO:0003674	molecular function	GO:0009507 GO:0009536	chloroplast; plastid
Glyma.05G013000	Only K6	down	AT1G49010	Duplicated homeodomain-like superfamily protein	MYB	GO:0009651 GO:0009733 GO:0009739 GO:0009751 GO:0009753 GO:0016556 GO:0046686	mRNA modification; response to auxin stimulus; response to cadmium ion; response to gibberellin stimulus; response to jasmonic acid stimulus; response to salicylic acid stimulus; response to salt stress	GO:0003677 GO:0003700	DNA binding; sequence-specific DNA binding transcription factor activity	GO:0005634	nucleus
Glyma.05G013600	Only K6	down	AT1G73965	CLAVATA3/ESR-RELATED 13		GO:0007165	signal transduction	GO:0005102	receptor binding	GO:0005576 GO:0048046	apoplast; extracellular region
Glyma.05G014100	Only K6	down	AT1G48960	Adenine nucleotide alpha hydrolases-like superfamily protein		GO:0002238	response to molecule of fungal origin	GO:0003674	molecular function	GO:0005575	cellular component
Glyma.05G014600	Only K6	up	AT1G68780	RNI-like superfamily protein		GO:0002237 GO:0007165 GO:0010103 GO:0048443	response to molecule of bacterial origin; signal transduction; stamen development; stomatal complex morphogenesis	NA	NA	GO:0005886	plasma membrane
Glyma.05G015000	Only JY93	down	AT5G23100	Protein of unknown function, DUF617		GO:0008150	biological process	GO:0003674	molecular function	GO:0005634	nucleus
Glyma.05G015700	Only K6	down	NA	NA		NA	NA	NA	NA	NA	NA
Glyma.05G019900	Only K6	up	AT5G60970	TEOSINTE BRANCHED 1, cycloidea and PCF transcription factor 5	TCP	GO:0000165 GO:0006355 GO:0006612 GO:0009617 GO:0009793 GO:0009862 GO:0009867 GO:0009965 GO:0010027 GO:0010228 GO:0010310 GO:0010363 GO:0016226 GO:0016556 GO:0030154 GO:0031348 GO:0035304 GO:0045893 GO:0045962 GO:0048366 GO:0048481	MAPK cascade; cell differentiation; embryo development ending in seed dormancy; iron-sulfur cluster assembly; jasmonic acid mediated signaling pathway; leaf development; leaf morphogenesis; mRNA modification; negative regulation of defense response; ovule development; positive regulation of development, heterochronic; positive regulation of transcription, DNA-dependent; protein targeting to membr…	GO:0003700	sequence-specific DNA binding transcription factor activity	GO:0005634	nucleus
Glyma.05G020500	Only K6	up	AT1G74210	PLC-like phosphodiesterases superfamily protein		GO:0006071 GO:0006629	glycerol metabolic process; lipid metabolic process	GO:0008081 GO:0008889	glycerophosphodiester phosphodiesterase activity; phosphoric diester hydrolase activity	GO:0005773 GO:0005886	plasma membrane; vacuole
Glyma.05G021100	Only JY93	up	AT1G64060	respiratory burst oxidase protein F		GO:0000165 GO:0002679 GO:0006612 GO:0006952 GO:0007154 GO:0007165 GO:0007231 GO:0009409 GO:0009414 GO:0009611 GO:0009627 GO:0009697 GO:0009723 GO:0009733 GO:0009737 GO:0009738 GO:0009753 GO:0009862 GO:0009867 GO:0009873 GO:0010119 GO:0010228 GO:0010363 GO:0016926 GO:0030968 GO:0031348 GO:0033500 GO:0035556 GO:0042538 GO:0043069 GO:0050665 GO:0050832 GO:0052542 GO:0072593	MAPK cascade; abscisic acid mediated signaling pathway; carbohydrate homeostasis; cell communication; defense response; defense response by callose deposition; defense response to fungus; endoplasmic reticulum unfolded protein response; ethylene mediated signaling pathway; hydrogen peroxide biosynthetic process; hyperosmotic salinity response; intracellular signal transduction; jasmonic acid medi…	GO:0004601 GO:0005506 GO:0005509 GO:0009055 GO:0016174 GO:0016491 GO:0050660 GO:0050664	NAD(P)H oxidase activity; calcium ion binding; electron carrier activity; flavin adenine dinucleotide binding; iron ion binding; oxidoreductase activity; oxidoreductase activity, acting on NAD(P)H, oxygen as acceptor; peroxidase activity	GO:0005886 GO:0005887	integral to plasma membrane; plasma membrane
Glyma.05G022600	Only JY93	up	AT3G29360	UDP-glucose 6-dehydrogenase family protein		GO:0005975 GO:0006007 GO:0006065 GO:0007030 GO:0007033 GO:0048767 GO:0052546	Golgi organization; UDP-glucuronate biosynthetic process; carbohydrate metabolic process; cell wall pectin metabolic process; glucose catabolic process; root hair elongation; vacuole organization	GO:0003979	UDP-glucose 6-dehydrogenase activity	GO:0005634 GO:0005737 GO:0005829	cytoplasm; cytosol; nucleus
Glyma.05G023100	Only K6	up	AT5G61210	soluble N-ethylmaleimide-sensitive factor adaptor protein 33		GO:0000165 GO:0000910 GO:0000911 GO:0002679 GO:0006499 GO:0006612 GO:0006820 GO:0006862 GO:0006888 GO:0006944 GO:0009595 GO:0009611 GO:0009612 GO:0009620 GO:0009625 GO:0009627 GO:0009695 GO:0009697 GO:0009737 GO:0009753 GO:0009862 GO:0009863 GO:0009867 GO:0010200 GO:0010310 GO:0010363 GO:0015696 GO:0015802 GO:0016192 GO:0030968 GO:0031348 GO:0042742 GO:0043069 GO:0043090 GO:0043269 GO:0043900 GO:…	ER to Golgi vesicle-mediated transport; MAPK cascade; N-terminal protein myristoylation; amino acid import; ammonium transport; anion transport; basic amino acid transport; cellular membrane fusion; cytokinesis; cytokinesis by cell plate formation; defense response to bacterium; defense response to fungus; detection of biotic stimulus; endoplasmic reticulum unfolded protein response; innate immun…	GO:0005484 GO:0005515	SNAP receptor activity; protein binding	GO:0005634 GO:0005886 GO:0009504 GO:0009507 GO:0016021	cell plate; chloroplast; integral to membrane; nucleus; plasma membrane
Glyma.05G023700	Only K6	up	AT5G61290	Flavin-binding monooxygenase family protein		GO:0006661 GO:0042744 GO:0055114	hydrogen peroxide catabolic process; oxidation-reduction process; phosphatidylinositol biosynthetic process	GO:0004497 GO:0004499 GO:0050660 GO:0050661	N,N-dimethylaniline monooxygenase activity; NADP binding; flavin adenine dinucleotide binding; monooxygenase activity	GO:0005634	nucleus
Glyma.05G023900	Only JY93	down	AT3G25400	CONTAINS InterPro DOMAIN/s: NTP Pyrophosphohydrolase MazG-related, RS21-C6 (InterPro:IPR011394), EAR (InterPro:		GO:0008150	biological process	GO:0003674	molecular function	GO:0005737	cytoplasm
Glyma.05G025200	Only JY93	down	AT1G74410	RING/U-box superfamily protein		GO:0010200	response to chitin	GO:0008270	zinc ion binding	NA	NA
Glyma.05G025400	Only K6	down	AT2G03220	fucosyltransferase 1		GO:0009744 GO:0009749 GO:0009750 GO:0009832 GO:0009969 GO:0010413 GO:0042546 GO:0045492	cell wall biogenesis; glucuronoxylan metabolic process; plant-type cell wall biogenesis; response to fructose stimulus; response to glucose stimulus; response to sucrose stimulus; xylan biosynthetic process; xyloglucan biosynthetic process	GO:0008107 GO:0008417 GO:0016757	fucosyltransferase activity; galactoside 2-alpha-L-fucosyltransferase activity; transferase activity, transferring glycosyl groups	GO:0005794 GO:0016020	Golgi apparatus; membrane
Glyma.05G025900	Only JY93	up	AT3G47500	cycling DOF factor 3	Dof	GO:0006355	regulation of transcription, DNA-dependent	GO:0003677 GO:0003700 GO:0005515 GO:0008270	DNA binding; protein binding; sequence-specific DNA binding transcription factor activity; zinc ion binding	GO:0005634	nucleus
Glyma.05G026900	Only K6	up	AT3G28917	mini zinc finger 2	ZF-HD	GO:0008150	biological process	GO:0003677	DNA binding	GO:0005634	nucleus
Glyma.05G029700	Only K6	up	AT3G01280	voltage dependent anion channel 1		GO:0006511 GO:0006820 GO:0009617 GO:0009853 GO:0044070 GO:0051788 GO:0055085 GO:0080129	anion transport; photorespiration; proteasome core complex assembly; regulation of anion transport; response to bacterium; response to misfolded protein; transmembrane transport; ubiquitin-dependent protein catabolic process	GO:0005515 GO:0008308	protein binding; voltage-gated anion channel activity	GO:0005739 GO:0005741 GO:0005773 GO:0005774 GO:0005886 GO:0009507 GO:0009536 GO:0009941	chloroplast; chloroplast envelope; mitochondrial outer membrane; mitochondrion; plasma membrane; plastid; vacuolar membrane; vacuole
Glyma.05G030000	Only K6	down	AT3G01470	homeobox 1	HD-ZIP	GO:0006355 GO:0009637 GO:0009651 GO:0009965 GO:0010167 GO:0015706 GO:0015996 GO:0045893	chlorophyll catabolic process; leaf morphogenesis; nitrate transport; positive regulation of transcription, DNA-dependent; regulation of transcription, DNA-dependent; response to blue light; response to nitrate; response to salt stress	GO:0000976 GO:0003677 GO:0003700 GO:0042803 GO:0043565	DNA binding; protein homodimerization activity; sequence-specific DNA binding; sequence-specific DNA binding transcription factor activity; transcription regulatory region sequence-specific DNA binding	GO:0005634	nucleus
Glyma.05G031200	Only JY93	up	AT1G74790	catalytics		GO:0005975	carbohydrate metabolic process	GO:0003824 GO:0016901 GO:0048038	catalytic activity; oxidoreductase activity, acting on the CH-OH group of donors, quinone or similar compound as acceptor; quinone binding	GO:0005886 GO:0031225 GO:0046658	anchored to membrane; anchored to plasma membrane; plasma membrane
Glyma.05G032800	Only JY93	up	AT5G42905	Polynucleotidyl transferase, ribonuclease H-like superfamily protein		NA	NA	GO:0003676 GO:0004523	nucleic acid binding; ribonuclease H activity	GO:0005575	cellular component
Glyma.05G033600	Only JY93	up	AT1G19020	NA		GO:0006979 GO:0009611 GO:0009625 GO:0009862 GO:0010200 GO:0030968 GO:0031348 GO:0050832	defense response to fungus; endoplasmic reticulum unfolded protein response; negative regulation of defense response; response to chitin; response to insect; response to oxidative stress; response to wounding; systemic acquired resistance, salicylic acid mediated signaling pathway	GO:0003674	molecular function	GO:0005575	cellular component
Glyma.05G033900	Only JY93	down	AT4G03410	Peroxisomal membrane 22 kDa (Mpv17/PMP22) family protein		GO:0008150	biological process	GO:0003674	molecular function	GO:0005739 GO:0016021	integral to membrane; mitochondrion
Glyma.05G034600	Only K6	up	AT5G62570	Calmodulin binding protein-like		GO:0008150 GO:0030968 GO:0052542	biological process; defense response by callose deposition; endoplasmic reticulum unfolded protein response	GO:0005516	calmodulin binding	GO:0005575	cellular component
Glyma.05G036200	Only K6	up	NA	NA		NA	NA	NA	NA	NA	NA
Glyma.05G036300	Only JY93	up	AT1G23820	spermidine synthase 1		GO:0008295	spermidine biosynthetic process	GO:0003824 GO:0004766 GO:0005515	catalytic activity; protein binding; spermidine synthase activity	GO:0005829 GO:0009507	chloroplast; cytosol
Glyma.05G037700	Only JY93	up	AT5G62520	similar to RCD one 5		GO:0009651 GO:0010200 GO:0072593	reactive oxygen species metabolic process; response to chitin; response to salt stress	GO:0003950	NAD+ ADP-ribosyltransferase activity	GO:0005634 GO:0005739	mitochondrion; nucleus
Glyma.05G040700	Only K6	down	AT5G26660	myb domain protein 86	MYB	GO:0045892	negative regulation of transcription, DNA-dependent	GO:0003677	DNA binding	GO:0005634	nucleus
Glyma.05G042400	Only JY93	up	AT5G50210	quinolinate synthase		GO:0009060 GO:0009435 GO:0016226 GO:0051176 GO:0051347	NAD biosynthetic process; aerobic respiration; iron-sulfur cluster assembly; positive regulation of sulfur metabolic process; positive regulation of transferase activity	GO:0008047 GO:0008987 GO:0042803 GO:0051539	4 iron, 4 sulfur cluster binding; enzyme activator activity; protein homodimerization activity; quinolinate synthetase A activity	GO:0009507	chloroplast
Glyma.05G043800	Only K6	up	NA	NA		NA	NA	NA	NA	NA	NA
Glyma.05G045200	Only JY93	up	AT5G63310	nucleoside diphosphate kinase 2		GO:0006165 GO:0006183 GO:0006228 GO:0006241 GO:0009411 GO:0009585 GO:0009734 GO:0019288 GO:0042542	CTP biosynthetic process; GTP biosynthetic process; UTP biosynthetic process; auxin mediated signaling pathway; isopentenyl diphosphate biosynthetic process, mevalonate-independent pathway; nucleoside diphosphate phosphorylation; red, far-red light phototransduction; response to UV; response to hydrogen peroxide	GO:0004550 GO:0005515 GO:0005524	ATP binding; nucleoside diphosphate kinase activity; protein binding	GO:0005634 GO:0005737 GO:0009507 GO:0009570 GO:0009579 GO:0009941	chloroplast; chloroplast envelope; chloroplast stroma; cytoplasm; nucleus; thylakoid
Glyma.05G047100	Only K6	up	AT1G76650	calmodulin-like 38		GO:0009611 GO:0009620 GO:0009695 GO:0009723 GO:0009738 GO:0009753 GO:0009873 GO:0010200 GO:0035556	abscisic acid mediated signaling pathway; ethylene mediated signaling pathway; intracellular signal transduction; jasmonic acid biosynthetic process; response to chitin; response to ethylene stimulus; response to fungus; response to jasmonic acid stimulus; response to wounding	GO:0005509	calcium ion binding	GO:0005634 GO:0005886	nucleus; plasma membrane
Glyma.05G048400	Only K6	down	AT3G48540	Cytidine/deoxycytidylate deaminase family protein		NA	NA	GO:0003824 GO:0008270 GO:0016787	catalytic activity; hydrolase activity; zinc ion binding	GO:0009507	chloroplast
Glyma.05G052100	Only K6	up	AT4G00110	UDP-D-glucuronate 4-epimerase 3		GO:0005975 GO:0009225 GO:0044237	carbohydrate metabolic process; cellular metabolic process; nucleotide-sugar metabolic process	GO:0000166 GO:0003824 GO:0016857 GO:0050378 GO:0050662	UDP-glucuronate 4-epimerase activity; catalytic activity; coenzyme binding; nucleotide binding; racemase and epimerase activity, acting on carbohydrates and derivatives	GO:0005794 GO:0016020	Golgi apparatus; membrane
Glyma.05G053400	Only K6	up	AT2G27830	NA		GO:0006914	autophagy	GO:0003674	molecular function	GO:0005634	nucleus
Glyma.05G053800	Only K6	down	AT4G12080	AT-hook motif nuclear-localized protein 1		GO:0016132	brassinosteroid biosynthetic process	GO:0003677	DNA binding	GO:0005634 GO:0005730 GO:0005737 GO:0005739	cytoplasm; mitochondrion; nucleolus; nucleus
Glyma.05G055700	Only K6	up	AT1G62710	beta vacuolar processing enzyme		GO:0006508 GO:0006624	proteolysis; vacuolar protein processing	GO:0004197	cysteine-type endopeptidase activity	NA	NA
Glyma.05G056100	Only JY93	up	AT4G12420	Cupredoxin superfamily protein		GO:0000271 GO:0009825 GO:0009932 GO:0010817 GO:0016051 GO:0030243 GO:0043481 GO:0048765 GO:0048767 GO:0055114 GO:0071555	anthocyanin accumulation in tissues in response to UV light; carbohydrate biosynthetic process; cell tip growth; cell wall organization; cellulose metabolic process; multidimensional cell growth; oxidation-reduction process; polysaccharide biosynthetic process; regulation of hormone levels; root hair cell differentiation; root hair elongation	GO:0005507 GO:0016491	copper ion binding; oxidoreductase activity	GO:0005576 GO:0005618 GO:0005774 GO:0005886 GO:0009505 GO:0009506 GO:0016020 GO:0031225 GO:0046658 GO:0048046	anchored to membrane; anchored to plasma membrane; apoplast; cell wall; extracellular region; membrane; plant-type cell wall; plasma membrane; plasmodesma; vacuolar membrane
Glyma.05G056300	Only JY93	up	AT1G12240	Glycosyl hydrolases family 32 protein		GO:0005975 GO:0006816 GO:0007030 GO:0009617 GO:0009651 GO:0071370 GO:0080022	Golgi organization; calcium ion transport; carbohydrate metabolic process; cellular response to gibberellin stimulus; primary root development; response to bacterium; response to salt stress	GO:0004553 GO:0004564 GO:0004575	beta-fructofuranosidase activity; hydrolase activity, hydrolyzing O-glycosyl compounds; sucrose alpha-glucosidase activity	GO:0000325 GO:0005773 GO:0009505	plant-type cell wall; plant-type vacuole; vacuole
Glyma.05G058100	Only JY93	up	AT4G17260	Lactate/malate dehydrogenase family protein		GO:0005975 GO:0006096 GO:0009651 GO:0009737 GO:0044262 GO:0055114	carbohydrate metabolic process; cellular carbohydrate metabolic process; glycolysis; oxidation-reduction process; response to abscisic acid stimulus; response to salt stress	GO:0000166 GO:0003824 GO:0004457 GO:0004459 GO:0016491 GO:0016616	L-lactate dehydrogenase activity; catalytic activity; lactate dehydrogenase activity; nucleotide binding; oxidoreductase activity; oxidoreductase activity, acting on the CH-OH group of donors, NAD or NADP as acceptor	GO:0005737 GO:0005829 GO:0005886	cytoplasm; cytosol; plasma membrane
Glyma.05G058900	Only K6	up	AT4G16563	Eukaryotic aspartyl protease family protein		GO:0006508	proteolysis	GO:0004190	aspartic-type endopeptidase activity	GO:0005576 GO:0009505	extracellular region; plant-type cell wall
Glyma.05G059300	Only K6	up	AT4G16600	Nucleotide-diphospho-sugar transferases superfamily protein		GO:0009058 GO:0016051	biosynthetic process; carbohydrate biosynthetic process	GO:0016757 GO:0016758	transferase activity, transferring glycosyl groups; transferase activity, transferring hexosyl groups	NA	NA
Glyma.05G060200	Only JY93	up	AT4G16650	O-fucosyltransferase family protein		GO:0008150	biological process	GO:0016757	transferase activity, transferring glycosyl groups	GO:0005768 GO:0005794 GO:0005802	Golgi apparatus; endosome; trans-Golgi network
Glyma.05G062700	Only K6	down	AT4G16780	homeobox protein 2	HD-ZIP	GO:0006351 GO:0006355 GO:0008283 GO:0009641 GO:0009733 GO:0009735 GO:0009826 GO:0010016 GO:0010017 GO:0010218 GO:0045892 GO:0048364	cell proliferation; negative regulation of transcription, DNA-dependent; red or far-red light signaling pathway; regulation of transcription, DNA-dependent; response to auxin stimulus; response to cytokinin stimulus; response to far red light; root development; shade avoidance; shoot system morphogenesis; transcription, DNA-dependent; unidimensional cell growth	GO:0000976 GO:0003677 GO:0003700 GO:0042803 GO:0043565	DNA binding; protein homodimerization activity; sequence-specific DNA binding; sequence-specific DNA binding transcription factor activity; transcription regulatory region sequence-specific DNA binding	GO:0005634	nucleus
Glyma.05G063500	Only K6	up	AT5G47230	ethylene responsive element binding factor 5	ERF	GO:0002679 GO:0006355 GO:0009409 GO:0009873 GO:0010200 GO:0035556 GO:0045893	ethylene mediated signaling pathway; intracellular signal transduction; positive regulation of transcription, DNA-dependent; regulation of transcription, DNA-dependent; respiratory burst involved in defense response; response to chitin; response to cold	GO:0003677 GO:0003700	DNA binding; sequence-specific DNA binding transcription factor activity	GO:0005634	nucleus
Glyma.05G063600	Only K6	up	AT4G17500	ethylene responsive element binding factor 1	ERF	GO:0002679 GO:0006355 GO:0009414 GO:0009723 GO:0009737 GO:0009738 GO:0009873 GO:0010200 GO:0035556 GO:0042538 GO:0045893	abscisic acid mediated signaling pathway; ethylene mediated signaling pathway; hyperosmotic salinity response; intracellular signal transduction; positive regulation of transcription, DNA-dependent; regulation of transcription, DNA-dependent; respiratory burst involved in defense response; response to abscisic acid stimulus; response to chitin; response to ethylene stimulus; response to water dep…	GO:0003677 GO:0003700	DNA binding; sequence-specific DNA binding transcription factor activity	GO:0005634 GO:0005643	nuclear pore; nucleus
Glyma.05G064200	Only K6	up	AT4G16820	alpha/beta-Hydrolases superfamily protein		GO:0006629 GO:0009693	ethylene biosynthetic process; lipid metabolic process	GO:0004806 GO:0008970 GO:0047714	galactolipase activity; phosphatidylcholine 1-acylhydrolase activity; triglyceride lipase activity	GO:0009507	chloroplast
Glyma.05G066800	Only K6	up	AT5G47100	calcineurin B-like protein 9		GO:0006499 GO:0009414 GO:0010107 GO:0010118 GO:0019722	N-terminal protein myristoylation; calcium-mediated signaling; potassium ion import; response to water deprivation; stomatal movement	GO:0005509 GO:0005515	calcium ion binding; protein binding	GO:0005737 GO:0005886 GO:0008287	cytoplasm; plasma membrane; protein serine/threonine phosphatase complex
Glyma.05G067800	Only K6	up	AT5G47070	Protein kinase superfamily protein		GO:0006468 GO:0009627 GO:0009697	protein phosphorylation; salicylic acid biosynthetic process; systemic acquired resistance	GO:0004672 GO:0004674 GO:0005524 GO:0016301 GO:0016772	ATP binding; kinase activity; protein kinase activity; protein serine/threonine kinase activity; transferase activity, transferring phosphorus-containing groups	GO:0005886	plasma membrane
Glyma.05G070200	Only JY93	up	AT4G18020	CheY-like two-component responsive regulator family protein	ARR-B	GO:0000160 GO:0006355 GO:0007623 GO:0009736	circadian rhythm; cytokinin mediated signaling pathway; phosphorelay signal transduction system; regulation of transcription, DNA-dependent	GO:0000156 GO:0003700 GO:0005515	phosphorelay response regulator activity; protein binding; sequence-specific DNA binding transcription factor activity	GO:0005634	nucleus
Glyma.05G079700	Only K6	up	AT3G43810	calmodulin 7		GO:0005513 GO:0006084 GO:0009612 GO:0010099 GO:0019722 GO:0019932	acetyl-CoA metabolic process; calcium-mediated signaling; detection of calcium ion; regulation of photomorphogenesis; response to mechanical stimulus; second-messenger-mediated signaling	GO:0005509 GO:0005515	calcium ion binding; protein binding	GO:0005737	cytoplasm
Glyma.05G080300	Only K6	up	AT1G73950	Transmembrane Fragile-X-F-associated protein		GO:0008150	biological process	GO:0008270	zinc ion binding	GO:0005634 GO:0005773	nucleus; vacuole
Glyma.05G082200	Only K6	up	AT5G66900	Disease resistance protein (CC-NBS-LRR class) family		GO:0006952	defense response	GO:0043531	ADP binding	GO:0005634	nucleus
Glyma.05G082500	Only K6	up	AT5G66900	Disease resistance protein (CC-NBS-LRR class) family		GO:0006952	defense response	GO:0043531	ADP binding	GO:0005634	nucleus
Glyma.05G085400	Only JY93	up	AT5G47820	P-loop containing nucleoside triphosphate hydrolases superfamily protein		GO:0000394 GO:0007018 GO:0009086 GO:0010075 GO:0010215	RNA splicing, via endonucleolytic cleavage and ligation; cellulose microfibril organization; methionine biosynthetic process; microtubule-based movement; regulation of meristem growth	GO:0003777 GO:0005524	ATP binding; microtubule motor activity	GO:0005634 GO:0005737	cytoplasm; nucleus
Glyma.05G089400	Only JY93	down	AT5G55000	potassium channel tetramerisation domain-containing protein / pentapeptide repeat-containing protein		GO:0006813	potassium ion transport	GO:0005249 GO:0005515	protein binding; voltage-gated potassium channel activity	GO:0005576 GO:0005634 GO:0008076 GO:0016020	extracellular region; membrane; nucleus; voltage-gated potassium channel complex
Glyma.05G091600	Only JY93	up	AT2G25450	2-oxoglutarate (2OG) and Fe(II)-dependent oxygenase superfamily protein		GO:0010439 GO:0019761 GO:0055114	glucosinolate biosynthetic process; oxidation-reduction process; regulation of glucosinolate biosynthetic process	GO:0009815 GO:0016491 GO:0016706	1-aminocyclopropane-1-carboxylate oxidase activity; oxidoreductase activity; oxidoreductase activity, acting on paired donors, with incorporation or reduction of molecular oxygen, 2-oxoglutarate as one donor, and incorporation of one atom each of oxygen into both donors	GO:0005737 GO:0009506	cytoplasm; plasmodesma
Glyma.05G092800	Only JY93	down	AT3G50260	cooperatively regulated by ethylene and jasmonate 1	ERF	GO:0002679 GO:0006355 GO:0009409 GO:0009414 GO:0009611 GO:0009617 GO:0009737 GO:0009738 GO:0010200 GO:0010941 GO:0035556 GO:0042538 GO:0042742	abscisic acid mediated signaling pathway; defense response to bacterium; hyperosmotic salinity response; intracellular signal transduction; regulation of cell death; regulation of transcription, DNA-dependent; respiratory burst involved in defense response; response to abscisic acid stimulus; response to bacterium; response to chitin; response to cold; response to water deprivation; response to w…	GO:0003677 GO:0003700	DNA binding; sequence-specific DNA binding transcription factor activity	GO:0005634	nucleus
Glyma.05G095400	Only JY93	up	AT3G11050	ferritin 2		GO:0000302 GO:0006826 GO:0006879 GO:0006979 GO:0009737 GO:0010039 GO:0015979 GO:0055072 GO:0055114	cellular iron ion homeostasis; iron ion homeostasis; iron ion transport; oxidation-reduction process; photosynthesis; response to abscisic acid stimulus; response to iron ion; response to oxidative stress; response to reactive oxygen species	GO:0008199 GO:0016491 GO:0046914	ferric iron binding; oxidoreductase activity; transition metal ion binding	GO:0009507	chloroplast
Glyma.05G097100	Only K6	up	AT5G67250	SKP1/ASK1-interacting protein 2		GO:0006499	N-terminal protein myristoylation	GO:0004842 GO:0005515	protein binding; ubiquitin-protein ligase activity	GO:0005634 GO:0005737	cytoplasm; nucleus
Glyma.05G097300	Only K6	up	AT5G67260	CYCLIN D3;2		GO:0010440 GO:0042127 GO:0048316 GO:0051726	regulation of cell cycle; regulation of cell proliferation; seed development; stomatal lineage progression	GO:0004693 GO:0005515	cyclin-dependent protein serine/threonine kinase activity; protein binding	GO:0005634	nucleus
Glyma.05G097400	Only K6	up	AT4G37250	Leucine-rich repeat protein kinase family protein		GO:0006468 GO:0007169	protein phosphorylation; transmembrane receptor protein tyrosine kinase signaling pathway	GO:0004672 GO:0004674 GO:0005524 GO:0016301 GO:0016772	ATP binding; kinase activity; protein kinase activity; protein serine/threonine kinase activity; transferase activity, transferring phosphorus-containing groups	GO:0005576	extracellular region
Glyma.05G099300	Only JY93	up	AT4G37290	NA		GO:0009693 GO:0009723 GO:0080167	ethylene biosynthetic process; response to ethylene stimulus; response to karrikin	GO:0003674	molecular function	GO:0005739	mitochondrion
Glyma.05G102800	Only K6	up	AT4G37470	alpha/beta-Hydrolases superfamily protein		GO:0009640 GO:0009704 GO:0009744 GO:0009813 GO:0010224 GO:0080167	de-etiolation; flavonoid biosynthetic process; photomorphogenesis; response to UV-B; response to karrikin; response to sucrose stimulus	GO:0016787	hydrolase activity	GO:0005737	cytoplasm
Glyma.05G102900	Only JY93	up	AT4G37470	alpha/beta-Hydrolases superfamily protein		GO:0009640 GO:0009704 GO:0009744 GO:0009813 GO:0010224 GO:0080167	de-etiolation; flavonoid biosynthetic process; photomorphogenesis; response to UV-B; response to karrikin; response to sucrose stimulus	GO:0016787	hydrolase activity	GO:0005737	cytoplasm
Glyma.05G103000	Only K6	down	AT5G67350	NA		GO:0008150	biological process	GO:0003674	molecular function	GO:0005634	nucleus
Glyma.05G104300	Only JY93	down	AT2G23090	Uncharacterised protein family SERF		GO:0008150	biological process	GO:0003674	molecular function	NA	NA
Glyma.05G105000	Only K6	down	AT2G14820	Phototropic-responsive NPH3 family protein		GO:0009416 GO:0009958	positive gravitropism; response to light stimulus	GO:0004871	signal transducer activity	GO:0005886 GO:0071944	cell periphery; plasma membrane
Glyma.05G107500	Only JY93	up	AT2G22880	VQ motif-containing protein		GO:0010224	response to UV-B	GO:0003674	molecular function	GO:0005634	nucleus
Glyma.05G108900	Only K6	down	AT4G37770	1-amino-cyclopropane-1-carboxylate synthase 8		GO:0009058 GO:0009693 GO:0010200 GO:0042218	1-aminocyclopropane-1-carboxylate biosynthetic process; biosynthetic process; ethylene biosynthetic process; response to chitin	GO:0003824 GO:0005515 GO:0016740 GO:0016847 GO:0030170 GO:0042802	1-aminocyclopropane-1-carboxylate synthase activity; catalytic activity; identical protein binding; protein binding; pyridoxal phosphate binding; transferase activity	GO:0005737	cytoplasm
Glyma.05G110400	Only K6	down	AT5G65700	Leucine-rich receptor-like protein kinase family protein		GO:0000271 GO:0006468 GO:0007020 GO:0007169 GO:0009825 GO:0009932 GO:0009934 GO:0010075 GO:0010480 GO:0010817 GO:0043481 GO:0048229 GO:0048437 GO:0048653 GO:0048767 GO:0071555	anther development; anthocyanin accumulation in tissues in response to UV light; cell tip growth; cell wall organization; floral organ development; gametophyte development; microsporocyte differentiation; microtubule nucleation; multidimensional cell growth; polysaccharide biosynthetic process; protein phosphorylation; regulation of hormone levels; regulation of meristem growth; regulation of mer…	GO:0004672 GO:0004674 GO:0005515 GO:0005524 GO:0016301 GO:0016772 GO:0033612 GO:0043621	ATP binding; kinase activity; protein binding; protein kinase activity; protein self-association; protein serine/threonine kinase activity; receptor serine/threonine kinase binding; transferase activity, transferring phosphorus-containing groups	GO:0005886	plasma membrane
Glyma.05G110600	Only K6	up	AT4G37850	basic helix-loop-helix (bHLH) DNA-binding superfamily protein	bHLH	GO:0006355	regulation of transcription, DNA-dependent	GO:0003677 GO:0003700	DNA binding; sequence-specific DNA binding transcription factor activity	GO:0005634	nucleus
Glyma.05G110900	Only K6	up	AT4G37850	basic helix-loop-helix (bHLH) DNA-binding superfamily protein	bHLH	GO:0006355	regulation of transcription, DNA-dependent	GO:0003677 GO:0003700	DNA binding; sequence-specific DNA binding transcription factor activity	GO:0005634	nucleus
Glyma.05G113000	Only JY93	up	AT4G17980	NAC domain containing protein 71	NAC	GO:0006355 GO:0007275	multicellular organismal development; regulation of transcription, DNA-dependent	GO:0003677 GO:0003700	DNA binding; sequence-specific DNA binding transcription factor activity	GO:0005634	nucleus
Glyma.05G113300	Only JY93	down	AT5G46580	pentatricopeptide (PPR) repeat-containing protein		GO:0008150 GO:0009073 GO:0009793 GO:0010103 GO:0016226 GO:0045036	aromatic amino acid family biosynthetic process; biological process; embryo development ending in seed dormancy; iron-sulfur cluster assembly; protein targeting to chloroplast; stomatal complex morphogenesis	NA	NA	GO:0009507	chloroplast
Glyma.05G119200	Only K6	up	AT4G13830	DNAJ-like 20		GO:0006457 GO:0015996	chlorophyll catabolic process; protein folding	GO:0031072	heat shock protein binding	GO:0005634 GO:0009507	chloroplast; nucleus
Glyma.05G124000	Only JY93	up	AT5G06860	polygalacturonase inhibiting protein 1		GO:0000165 GO:0006612 GO:0006865 GO:0006952 GO:0007154 GO:0007165 GO:0009409 GO:0009738 GO:0009862 GO:0009867 GO:0010363 GO:0030968 GO:0031348 GO:0043069 GO:0050832	MAPK cascade; abscisic acid mediated signaling pathway; amino acid transport; cell communication; defense response; defense response to fungus; endoplasmic reticulum unfolded protein response; jasmonic acid mediated signaling pathway; negative regulation of defense response; negative regulation of programmed cell death; protein targeting to membrane; regulation of plant-type hypersensitive respon…	GO:0090353	polygalacturonase inhibitor activity	GO:0005576 GO:0005618 GO:0005794 GO:0009505 GO:0009506	Golgi apparatus; cell wall; extracellular region; plant-type cell wall; plasmodesma
Glyma.05G125600	Only K6	up	AT4G20840	FAD-binding Berberine family protein		GO:0055114	oxidation-reduction process	GO:0003824 GO:0008762 GO:0009055 GO:0016491 GO:0016614 GO:0050660	UDP-N-acetylmuramate dehydrogenase activity; catalytic activity; electron carrier activity; flavin adenine dinucleotide binding; oxidoreductase activity; oxidoreductase activity, acting on CH-OH group of donors	GO:0005886 GO:0009507 GO:0048046	apoplast; chloroplast; plasma membrane
Glyma.05G126400	Only K6	up	AT4G20140	Leucine-rich repeat transmembrane protein kinase		GO:0006468 GO:0007169 GO:0008544 GO:0009790	embryo development; epidermis development; protein phosphorylation; transmembrane receptor protein tyrosine kinase signaling pathway	GO:0004672 GO:0004674 GO:0005524 GO:0016772	ATP binding; protein kinase activity; protein serine/threonine kinase activity; transferase activity, transferring phosphorus-containing groups	NA	NA
Glyma.05G126800	Only K6	down	AT5G61820	NA		GO:0008150 GO:0009610 GO:0009738 GO:0046482	abscisic acid mediated signaling pathway; biological process; para-aminobenzoic acid metabolic process; response to symbiotic fungus	GO:0003674	molecular function	GO:0005773 GO:0009507	chloroplast; vacuole
Glyma.05G128400	Only K6	up	NA	NA		NA	NA	NA	NA	NA	NA
Glyma.05G128800	Only K6	up	NA	NA		NA	NA	NA	NA	NA	NA
Glyma.05G129100	Only JY93	down	NA	NA		NA	NA	NA	NA	NA	NA
Glyma.05G129200	Only K6	up	AT5G46295	NA		GO:0008150	biological process	GO:0003674	molecular function	GO:0005739	mitochondrion
Glyma.05G131400	Only JY93	down	AT3G20330	PYRIMIDINE B		GO:0006164 GO:0006207 GO:0006520 GO:0009220 GO:0016036	de novo' pyrimidine nucleobase biosynthetic process; cellular amino acid metabolic process; cellular response to phosphate starvation; purine nucleotide biosynthetic process; pyrimidine ribonucleotide biosynthetic process	GO:0004070 GO:0005515 GO:0016597 GO:0016743	amino acid binding; aspartate carbamoyltransferase activity; carboxyl- or carbamoyltransferase activity; protein binding	GO:0005829 GO:0009507 GO:0009570	chloroplast; chloroplast stroma; cytosol
Glyma.05G135900	Only JY93	down	AT2G02180	tobamovirus multiplication protein 3		GO:0046786	viral replication complex formation and maintenance	NA	NA	GO:0005739	mitochondrion
Glyma.05G136300	Only K6	down	AT2G02040	peptide transporter 2		GO:0006857 GO:0006869 GO:0006891 GO:0010351 GO:0015833 GO:0016558 GO:0042938 GO:0042939	dipeptide transport; intra-Golgi vesicle-mediated transport; lipid transport; lithium ion transport; oligopeptide transport; peptide transport; protein import into peroxisome matrix; tripeptide transport	GO:0005215 GO:0015197 GO:0015334 GO:0042936 GO:0042937	dipeptide transporter activity; high affinity oligopeptide transporter activity; peptide transporter activity; transporter activity; tripeptide transporter activity	GO:0000325 GO:0005773 GO:0005774 GO:0005794 GO:0005886 GO:0009705	Golgi apparatus; plant-type vacuole; plant-type vacuole membrane; plasma membrane; vacuolar membrane; vacuole
Glyma.05G137500	Only JY93	down	AT1G17020	senescence-related gene 1		GO:0009737 GO:0009793 GO:0009813 GO:0009830 GO:0009845 GO:0010162 GO:0010260 GO:0055114	cell wall modification involved in abscission; embryo development ending in seed dormancy; flavonoid biosynthetic process; organ senescence; oxidation-reduction process; response to abscisic acid stimulus; seed dormancy process; seed germination	GO:0016491 GO:0016682 GO:0016706	oxidoreductase activity; oxidoreductase activity, acting on diphenols and related substances as donors, oxygen as acceptor; oxidoreductase activity, acting on paired donors, with incorporation or reduction of molecular oxygen, 2-oxoglutarate as one donor, and incorporation of one atom each of oxygen into both donors	GO:0005737	cytoplasm
Glyma.05G137900	Only K6	up	AT4G33170	Tetratricopeptide repeat (TPR)-like superfamily protein		NA	NA	NA	NA	GO:0005739	mitochondrion
Glyma.05G138400	Only JY93	down	AT2G01890	purple acid phosphatase 8		GO:0010167 GO:0015706 GO:0016311	dephosphorylation; nitrate transport; response to nitrate	GO:0003993 GO:0004722 GO:0016787	acid phosphatase activity; hydrolase activity; protein serine/threonine phosphatase activity	GO:0005576	extracellular region
Glyma.05G138900	Only K6	up	AT1G14740	Protein of unknown function (DUF1423)		GO:0001708 GO:0009880 GO:0090421	cell fate specification; embryonic meristem initiation; embryonic pattern specification	GO:0005515	protein binding	GO:0005634	nucleus
Glyma.05G139500	Only K6	up	AT1G70740	Protein kinase superfamily protein		GO:0006468	protein phosphorylation	GO:0004672 GO:0004674 GO:0004713 GO:0005524 GO:0016301 GO:0016772	ATP binding; kinase activity; protein kinase activity; protein serine/threonine kinase activity; protein tyrosine kinase activity; transferase activity, transferring phosphorus-containing groups	GO:0005634	nucleus
Glyma.05G140600	Only K6	down	AT1G70780	NA		GO:0008150	biological process	GO:0003674	molecular function	NA	NA
Glyma.05G143200	Only K6	up	AT1G30280	Chaperone DnaJ-domain superfamily protein		NA	NA	GO:0031072	heat shock protein binding	GO:0005737	cytoplasm
Glyma.05G144300	Only K6	down	AT1G24440	RING/U-box superfamily protein		NA	NA	GO:0008270	zinc ion binding	GO:0005634	nucleus
Glyma.05G145000	Only JY93	down	AT3G13080	multidrug resistance-associated protein 3		GO:0006810 GO:0055085	transmembrane transport; transport	GO:0000166 GO:0005524 GO:0010290 GO:0015431 GO:0016887 GO:0017111 GO:0042626	ATP binding; ATPase activity; ATPase activity, coupled to transmembrane movement of substances; chlorophyll catabolite transmembrane transporter activity; glutathione S-conjugate-exporting ATPase activity; nucleoside-triphosphatase activity; nucleotide binding	GO:0000325 GO:0005773 GO:0005774 GO:0005886 GO:0009506 GO:0016021 GO:0048046	apoplast; integral to membrane; plant-type vacuole; plasma membrane; plasmodesma; vacuolar membrane; vacuole
Glyma.05G145200	Only K6	down	AT3G01750	Ankyrin repeat family protein		GO:0008150	biological process	NA	NA	GO:0005737	cytoplasm
Glyma.05G146600	Only K6	down	AT1G67420	Zn-dependent exopeptidases superfamily protein		GO:0006508 GO:0007059 GO:0007062 GO:0007129 GO:0007131 GO:0009887 GO:0009888 GO:0010332 GO:0010638 GO:0032204 GO:0032504 GO:0033044 GO:0042138 GO:0043247 GO:0045132	chromosome segregation; meiotic DNA double-strand break formation; meiotic chromosome segregation; multicellular organism reproduction; organ morphogenesis; positive regulation of organelle organization; proteolysis; reciprocal meiotic recombination; regulation of chromosome organization; regulation of telomere maintenance; response to gamma radiation; sister chromatid cohesion; synapsis; telomer…	GO:0008233	peptidase activity	NA	NA
Glyma.05G147100	Only JY93	down	AT1G13710	cytochrome P450, family 78, subfamily A, polypeptide 5		GO:0008284 GO:0010075 GO:0010338 GO:0035265 GO:0040009 GO:0046622 GO:0048437 GO:0055114	floral organ development; leaf formation; organ growth; oxidation-reduction process; positive regulation of cell proliferation; positive regulation of organ growth; regulation of growth rate; regulation of meristem growth	GO:0005506 GO:0009055 GO:0016705 GO:0019825 GO:0020037	electron carrier activity; heme binding; iron ion binding; oxidoreductase activity, acting on paired donors, with incorporation or reduction of molecular oxygen; oxygen binding	GO:0005783	endoplasmic reticulum
Glyma.05G149700	Only JY93	up	AT4G14150	phragmoplast-associated kinesin-related protein 1		GO:0000226 GO:0000280 GO:0000911 GO:0000914 GO:0006260 GO:0006270 GO:0006275 GO:0006306 GO:0006346 GO:0008283 GO:0010389 GO:0031048 GO:0042023 GO:0051225 GO:0051567 GO:0051726 GO:0055046 GO:0080175	DNA endoreduplication; DNA methylation; DNA replication; DNA replication initiation; cell proliferation; chromatin silencing by small RNA; cytokinesis by cell plate formation; histone H3-K9 methylation; methylation-dependent chromatin silencing; microgametogenesis; microtubule cytoskeleton organization; nuclear division; phragmoplast assembly; phragmoplast microtubule organization; regulation of …	GO:0003777 GO:0005515 GO:0008574	microtubule motor activity; plus-end-directed microtubule motor activity; protein binding	GO:0005737 GO:0009524	cytoplasm; phragmoplast
Glyma.05G149900	Only JY93	up	AT5G48570	FKBP-type peptidyl-prolyl cis-trans isomerase family protein		GO:0000413 GO:0006457 GO:0006499 GO:0009408 GO:0009644 GO:0018208 GO:0034976 GO:0042542 GO:0070370	N-terminal protein myristoylation; cellular heat acclimation; peptidyl-proline modification; protein folding; protein peptidyl-prolyl isomerization; response to endoplasmic reticulum stress; response to heat; response to high light intensity; response to hydrogen peroxide	GO:0003755 GO:0005515 GO:0005516 GO:0005528	FK506 binding; calmodulin binding; peptidyl-prolyl cis-trans isomerase activity; protein binding	GO:0005634 GO:0005773 GO:0016020	membrane; nucleus; vacuole
Glyma.05G150400	Only K6	up	AT3G23730	xyloglucan endotransglucosylase/hydrolase 16		GO:0005975 GO:0006073	carbohydrate metabolic process; cellular glucan metabolic process	GO:0004553 GO:0016762 GO:0016798	hydrolase activity, acting on glycosyl bonds; hydrolase activity, hydrolyzing O-glycosyl compounds; xyloglucan:xyloglucosyl transferase activity	GO:0005576 GO:0005618 GO:0048046	apoplast; cell wall; extracellular region
Glyma.05G150500	Only K6	down	AT3G23740	NA		GO:0006260 GO:0006270 GO:0006275 GO:0006306 GO:0008150 GO:0008283 GO:0051567 GO:0051726	DNA methylation; DNA replication; DNA replication initiation; biological process; cell proliferation; histone H3-K9 methylation; regulation of DNA replication; regulation of cell cycle	GO:0003674	molecular function	GO:0005634	nucleus
Glyma.05G151400	Only K6	up	AT4G14010	ralf-like 32		GO:0007267	cell-cell signaling	GO:0004871	signal transducer activity	GO:0005576 GO:0048046	apoplast; extracellular region
Glyma.05G152100	Only JY93	up	AT4G13930	serine hydroxymethyltransferase 4		GO:0006544 GO:0006563 GO:0007623 GO:0046686	L-serine metabolic process; circadian rhythm; glycine metabolic process; response to cadmium ion	GO:0004372 GO:0005515	glycine hydroxymethyltransferase activity; protein binding	GO:0005737 GO:0005829 GO:0005886 GO:0009506 GO:0016020	cytoplasm; cytosol; membrane; plasma membrane; plasmodesma
Glyma.05G152200	Only JY93	up	AT2G04160	Subtilisin-like serine endopeptidase family protein		GO:0006508 GO:0008152 GO:0009733 GO:0010102 GO:0019761 GO:0043086	glucosinolate biosynthetic process; lateral root morphogenesis; metabolic process; negative regulation of catalytic activity; proteolysis; response to auxin stimulus	GO:0004252 GO:0042802	identical protein binding; serine-type endopeptidase activity	GO:0005576 GO:0005618	cell wall; extracellular region
Glyma.05G152300	Only K6	down	AT3G23820	UDP-D-glucuronate 4-epimerase 6		GO:0005975 GO:0006569 GO:0009225 GO:0009684 GO:0044237	carbohydrate metabolic process; cellular metabolic process; indoleacetic acid biosynthetic process; nucleotide-sugar metabolic process; tryptophan catabolic process	GO:0000166 GO:0003824 GO:0005515 GO:0016857 GO:0050378 GO:0050662	UDP-glucuronate 4-epimerase activity; catalytic activity; coenzyme binding; nucleotide binding; protein binding; racemase and epimerase activity, acting on carbohydrates and derivatives	GO:0005768 GO:0005794 GO:0005802	Golgi apparatus; endosome; trans-Golgi network
Glyma.05G153200	Only JY93	up	AT5G13930	Chalcone and stilbene synthase family protein		GO:0006979 GO:0008152 GO:0009058 GO:0009411 GO:0009611 GO:0009629 GO:0009715 GO:0009718 GO:0009733 GO:0009744 GO:0009753 GO:0009813 GO:0009926 GO:0010224 GO:0031540	anthocyanin-containing compound biosynthetic process; auxin polar transport; biosynthetic process; chalcone biosynthetic process; flavonoid biosynthetic process; metabolic process; regulation of anthocyanin biosynthetic process; response to UV; response to UV-B; response to auxin stimulus; response to gravity; response to jasmonic acid stimulus; response to oxidative stress; response to sucrose s…	GO:0003824 GO:0005515 GO:0016210 GO:0016746 GO:0016747	catalytic activity; naringenin-chalcone synthase activity; protein binding; transferase activity, transferring acyl groups; transferase activity, transferring acyl groups other than amino-acyl groups	GO:0005634 GO:0005737 GO:0005783 GO:0009705	cytoplasm; endoplasmic reticulum; nucleus; plant-type vacuole membrane
Glyma.05G154100	Only K6	up	AT2G32760	NA		GO:0008150	biological process	GO:0003674	molecular function	GO:0005737	cytoplasm
Glyma.05G154900	Only K6	up	NA	NA		NA	NA	NA	NA	NA	NA
Glyma.05G155500	Only JY93	down	AT3G13620	Amino acid permease family protein		GO:0015846 GO:0016126 GO:0046520	polyamine transport; sphingoid biosynthetic process; sterol biosynthetic process	GO:0015203 GO:0015326	cationic amino acid transmembrane transporter activity; polyamine transmembrane transporter activity	GO:0005886 GO:0016020	membrane; plasma membrane
Glyma.05G156600	Only K6	up	AT3G13600	calmodulin-binding family protein		GO:0008150	biological process	GO:0005516	calmodulin binding	GO:0005634	nucleus
Glyma.05G156800	Only JY93	down	AT5G19830	Peptidyl-tRNA hydrolase family protein		GO:0006412 GO:0006783	heme biosynthetic process; translation	GO:0004045	aminoacyl-tRNA hydrolase activity	GO:0005739	mitochondrion
Glyma.05G157000	Only JY93	up	AT1G75390	basic leucine-zipper 44	bZIP	GO:0006355 GO:0009410 GO:0009845 GO:0030968	endoplasmic reticulum unfolded protein response; regulation of transcription, DNA-dependent; response to xenobiotic stimulus; seed germination	GO:0003677 GO:0003700 GO:0043565 GO:0046982	DNA binding; protein heterodimerization activity; sequence-specific DNA binding; sequence-specific DNA binding transcription factor activity	GO:0005634	nucleus
Glyma.05G158200	Only JY93	down	AT1G29160	Dof-type zinc finger DNA-binding family protein	Dof	GO:0006355	regulation of transcription, DNA-dependent	GO:0003677 GO:0003700 GO:0008270	DNA binding; sequence-specific DNA binding transcription factor activity; zinc ion binding	GO:0005634	nucleus
Glyma.05G160500	Only K6	up	AT2G42760	NA		GO:0008150	biological process	GO:0003674	molecular function	GO:0005634	nucleus
Glyma.05G161400	Only JY93	up	AT2G29420	glutathione S-transferase tau 7		GO:0009407 GO:0009751 GO:0010583	response to cyclopentenone; response to salicylic acid stimulus; toxin catabolic process	GO:0004364	glutathione transferase activity	GO:0005737 GO:0005829	cytoplasm; cytosol
Glyma.05G161600	Only JY93	up	AT2G29420	glutathione S-transferase tau 7		GO:0009407 GO:0009751 GO:0010583	response to cyclopentenone; response to salicylic acid stimulus; toxin catabolic process	GO:0004364	glutathione transferase activity	GO:0005737 GO:0005829	cytoplasm; cytosol
Glyma.05G162800	Only K6	up	AT1G29750	receptor-like kinase in flowers 1		GO:0006468 GO:0006857 GO:0007169	oligopeptide transport; protein phosphorylation; transmembrane receptor protein tyrosine kinase signaling pathway	GO:0004672 GO:0004674 GO:0004702 GO:0004713 GO:0005524 GO:0016301 GO:0016772	ATP binding; kinase activity; protein kinase activity; protein serine/threonine kinase activity; protein tyrosine kinase activity; receptor signaling protein serine/threonine kinase activity; transferase activity, transferring phosphorus-containing groups	GO:0005886	plasma membrane
Glyma.05G163600	Only K6	up	AT1G78580	trehalose-6-phosphate synthase		GO:0005991 GO:0005992 GO:0009664 GO:0009790 GO:0009793 GO:0009832 GO:0010182 GO:0051301	cell division; embryo development; embryo development ending in seed dormancy; plant-type cell wall biogenesis; plant-type cell wall organization; sugar mediated signaling pathway; trehalose biosynthetic process; trehalose metabolic process	GO:0003824 GO:0003825 GO:0016757	alpha,alpha-trehalose-phosphate synthase (UDP-forming) activity; catalytic activity; transferase activity, transferring glycosyl groups	GO:0005737	cytoplasm
Glyma.05G174000	Only K6	up	AT3G55270	mitogen-activated protein kinase phosphatase 1		GO:0006470 GO:0006487 GO:0006499 GO:0006888 GO:0006970 GO:0009409 GO:0009651 GO:0010224 GO:0010225 GO:0010374 GO:0016311 GO:0035556 GO:0043090 GO:0048481	ER to Golgi vesicle-mediated transport; N-terminal protein myristoylation; amino acid import; dephosphorylation; intracellular signal transduction; ovule development; protein N-linked glycosylation; protein dephosphorylation; response to UV-B; response to UV-C; response to cold; response to osmotic stress; response to salt stress; stomatal complex development	GO:0004725 GO:0008138 GO:0016791 GO:0017017	MAP kinase tyrosine/serine/threonine phosphatase activity; phosphatase activity; protein tyrosine/serine/threonine phosphatase activity; protein tyrosine phosphatase activity	GO:0005634 GO:0005829	cytosol; nucleus
Glyma.05G175000	Only K6	up	AT1G12990	beta-1,4-N-acetylglucosaminyltransferase family protein		GO:0006487	protein N-linked glycosylation	GO:0003830 GO:0008375 GO:0016757	acetylglucosaminyltransferase activity; beta-1,4-mannosylglycoprotein 4-beta-N-acetylglucosaminyltransferase activity; transferase activity, transferring glycosyl groups	GO:0005794 GO:0016020	Golgi apparatus; membrane
Glyma.05G175800	Only K6	up	NA	NA		NA	NA	NA	NA	NA	NA
Glyma.05G176100	Only K6	down	AT4G33950	Protein kinase superfamily protein		GO:0005985 GO:0006468 GO:0006636 GO:0006970 GO:0009414 GO:0009651 GO:0009737 GO:0009738 GO:0010118 GO:0010119 GO:0019432 GO:0040007 GO:0042742 GO:0042744 GO:0048366 GO:2000377	abscisic acid mediated signaling pathway; defense response to bacterium; growth; hydrogen peroxide catabolic process; leaf development; protein phosphorylation; regulation of reactive oxygen species metabolic process; regulation of stomatal movement; response to abscisic acid stimulus; response to osmotic stress; response to salt stress; response to water deprivation; stomatal movement; sucrose m…	GO:0004672 GO:0004674 GO:0004713 GO:0005515 GO:0005524 GO:0009931 GO:0016301 GO:0016772	ATP binding; calcium-dependent protein serine/threonine kinase activity; kinase activity; protein binding; protein kinase activity; protein serine/threonine kinase activity; protein tyrosine kinase activity; transferase activity, transferring phosphorus-containing groups	GO:0005634 GO:0005737 GO:0005829	cytoplasm; cytosol; nucleus
Glyma.05G178300	Only K6	up	AT5G10260	RAB GTPase homolog H1E		GO:0006891 GO:0006944 GO:0007264 GO:0015031	cellular membrane fusion; intra-Golgi vesicle-mediated transport; protein transport; small GTPase mediated signal transduction	GO:0005525	GTP binding	GO:0005794	Golgi apparatus
Glyma.05G178600	Only K6	down	AT4G39880	Ribosomal protein L23/L15e family protein		GO:0006354 GO:0006412 GO:0009220 GO:0042254	DNA-dependent transcription, elongation; pyrimidine ribonucleotide biosynthetic process; ribosome biogenesis; translation	GO:0000166 GO:0003735	nucleotide binding; structural constituent of ribosome	GO:0005622 GO:0005840	intracellular; ribosome
Glyma.05G178700	Only JY93	up	AT5G65020	annexin 2		GO:0006084 GO:0009408 GO:0009409 GO:0009414 GO:0009651 GO:0015774 GO:0016126 GO:0016132	acetyl-CoA metabolic process; brassinosteroid biosynthetic process; polysaccharide transport; response to cold; response to heat; response to salt stress; response to water deprivation; sterol biosynthetic process	GO:0005509 GO:0005544	calcium-dependent phospholipid binding; calcium ion binding	GO:0005634 GO:0005829 GO:0009507 GO:0009579 GO:0009986 GO:0048046	apoplast; cell surface; chloroplast; cytosol; nucleus; thylakoid
Glyma.05G182600	Only K6	down	AT4G39660	alanine:glyoxylate aminotransferase 2		GO:0019544 GO:0046686	arginine catabolic process to glutamate; response to cadmium ion	GO:0003824 GO:0008270 GO:0008453 GO:0008483 GO:0030170	alanine-glyoxylate transaminase activity; catalytic activity; pyridoxal phosphate binding; transaminase activity; zinc ion binding	GO:0005739 GO:0005774 GO:0016020	membrane; mitochondrion; vacuolar membrane
Glyma.05G183200	Only JY93	down	AT4G14540	nuclear factor Y, subunit B3	NF-YB	GO:0006355	regulation of transcription, DNA-dependent	GO:0003677 GO:0003700 GO:0043565	DNA binding; sequence-specific DNA binding; sequence-specific DNA binding transcription factor activity	GO:0005622 GO:0005634	intracellular; nucleus
Glyma.05G184500	Only JY93	up	AT5G64810	WRKY DNA-binding protein 51	WRKY	GO:0006355 GO:0009867 GO:0042742 GO:0050832	defense response to bacterium; defense response to fungus; jasmonic acid mediated signaling pathway; regulation of transcription, DNA-dependent	GO:0003700 GO:0043565	sequence-specific DNA binding; sequence-specific DNA binding transcription factor activity	GO:0005634	nucleus
Glyma.05G185700	Only K6	down	AT4G39390	nucleotide sugar transporter-KT 1		GO:0006863 GO:0015780 GO:0055085	nucleotide-sugar transport; purine nucleobase transport; transmembrane transport	GO:0005338	nucleotide-sugar transmembrane transporter activity	GO:0000139 GO:0005886	Golgi membrane; plasma membrane
Glyma.05G186400	Only K6	down	NA	NA		NA	NA	NA	NA	NA	NA
Glyma.05G188500	Only JY93	down	AT3G27740	carbamoyl phosphate synthetase A		GO:0001510 GO:0006164 GO:0006543 GO:0009220 GO:0016036 GO:0070409	RNA methylation; carbamoyl phosphate biosynthetic process; cellular response to phosphate starvation; glutamine catabolic process; purine nucleotide biosynthetic process; pyrimidine ribonucleotide biosynthetic process	GO:0004088	carbamoyl-phosphate synthase (glutamine-hydrolyzing) activity	GO:0005951 GO:0009507 GO:0009570	carbamoyl-phosphate synthase complex; chloroplast; chloroplast stroma
Glyma.05G190100	Only K6	down	AT1G77160	Protein of unknown function (DUF506) _x0001_		GO:0008150	biological process	GO:0003674	molecular function	GO:0005575	cellular component
Glyma.05G192500	Only K6	down	AT5G64530	xylem NAC domain 1	NAC	GO:0006355 GO:0007275 GO:0010089 GO:0043067 GO:0048367	multicellular organismal development; regulation of programmed cell death; regulation of transcription, DNA-dependent; shoot system development; xylem development	GO:0003677 GO:0003700	DNA binding; sequence-specific DNA binding transcription factor activity	GO:0005634	nucleus
Glyma.05G192700	Only JY93	up	AT2G13610	ABC-2 type transporter family protein		GO:0010103	stomatal complex morphogenesis	GO:0000166 GO:0005524 GO:0016887 GO:0017111 GO:0042626	ATP binding; ATPase activity; ATPase activity, coupled to transmembrane movement of substances; nucleoside-triphosphatase activity; nucleotide binding	GO:0016020	membrane
Glyma.05G194400	Only JY93	up	AT5G63860	Regulator of chromosome condensation (RCC1) family protein		GO:0006007 GO:0009411 GO:0009649 GO:0010224	entrainment of circadian clock; glucose catabolic process; response to UV; response to UV-B	GO:0003682 GO:0005085 GO:0005515 GO:0042803	chromatin binding; guanyl-nucleotide exchange factor activity; protein binding; protein homodimerization activity	GO:0000785 GO:0005634 GO:0005737 GO:0005829	chromatin; cytoplasm; cytosol; nucleus
Glyma.05G195900	Only K6	down	AT5G08720	NA		GO:0008150	biological process	GO:0003674 GO:0005515	molecular function; protein binding	GO:0005739 GO:0009507	chloroplast; mitochondrion
Glyma.05G196200	Only K6	down	NA	NA		NA	NA	NA	NA	NA	NA
Glyma.05G196900	Only JY93	up	AT4G24290	MAC/Perforin domain-containing protein		GO:0008150	biological process	GO:0003674	molecular function	GO:0005576 GO:0005886	extracellular region; plasma membrane
Glyma.05G197500	Only K6	down	AT5G63640	ENTH/VHS/GAT family protein		GO:0006886 GO:0006891	intra-Golgi vesicle-mediated transport; intracellular protein transport	GO:0008565	protein transporter activity	GO:0005622 GO:0005634 GO:0005795 GO:0005886	Golgi stack; intracellular; nucleus; plasma membrane
Glyma.05G197900	Only JY93	down	AT1G72160	Sec14p-like phosphatidylinositol transfer family protein		GO:0006810	transport	GO:0005215	transporter activity	GO:0005634 GO:0005886 GO:0016021	integral to membrane; nucleus; plasma membrane
Glyma.05G199300	Only JY93	up	AT5G07330	NA		GO:0006457 GO:0008150 GO:0009408 GO:0009644 GO:0042542	biological process; protein folding; response to heat; response to high light intensity; response to hydrogen peroxide	GO:0003674	molecular function	NA	NA
Glyma.05G208500	Only K6	down	AT2G45900	Phosphatidylinositol N-acetyglucosaminlytransferase subunit P-related		GO:0009739	response to gibberellin stimulus	GO:0003674	molecular function	GO:0005634 GO:0009506	nucleus; plasmodesma
Glyma.05G211700	Only K6	up	AT3G61510	ACC synthase 1		GO:0009058 GO:0009693 GO:0042218	1-aminocyclopropane-1-carboxylate biosynthetic process; biosynthetic process; ethylene biosynthetic process	GO:0003824 GO:0016740 GO:0016847 GO:0030170	1-aminocyclopropane-1-carboxylate synthase activity; catalytic activity; pyridoxal phosphate binding; transferase activity	GO:0005737	cytoplasm
Glyma.05G212300	Only K6	up	AT5G41590	Protein of unknown function (DUF567)		GO:0008150	biological process	GO:0003674	molecular function	GO:0005575	cellular component
Glyma.05G212600	Only K6	up	AT2G46150	Late embryogenesis abundant (LEA) hydroxyproline-rich glycoprotein family		GO:0008150	biological process	GO:0003674	molecular function	GO:0005886	plasma membrane
Glyma.05G213300	Only K6	up	AT1G64140	NA		GO:0008150	biological process	GO:0003674	molecular function	GO:0005576	extracellular region
Glyma.05G215700	Only K6	up	AT5G41810	NA		GO:0008150	biological process	GO:0003674	molecular function	GO:0005634	nucleus
Glyma.05G216900	Only K6	up	AT4G23880	NA		GO:0008150	biological process	GO:0003674	molecular function	GO:0005634	nucleus
Glyma.05G217000	Only JY93	up	AT5G53110	RING/U-box superfamily protein		GO:0006865 GO:0008150	amino acid transport; biological process	GO:0008270	zinc ion binding	NA	NA
Glyma.05G218400	Only JY93	up	AT1G64500	Glutaredoxin family protein		GO:0006499 GO:0009902 GO:0045454 GO:0048653 GO:0051017	N-terminal protein myristoylation; actin filament bundle assembly; anther development; cell redox homeostasis; chloroplast relocation	GO:0009055 GO:0015035	electron carrier activity; protein disulfide oxidoreductase activity	GO:0005634 GO:0005884	actin filament; nucleus
Glyma.05G218700	Only K6	down	AT4G24015	RING/U-box superfamily protein		GO:0008150	biological process	GO:0008270	zinc ion binding	GO:0005575	cellular component
Glyma.05G219400	Only K6	down	AT5G42020	Heat shock protein 70 (Hsp 70) family protein		GO:0006457 GO:0009408 GO:0010197 GO:0034976 GO:0046686	polar nucleus fusion; protein folding; response to cadmium ion; response to endoplasmic reticulum stress; response to heat	GO:0005524	ATP binding	GO:0005618 GO:0005634 GO:0005730 GO:0005773 GO:0005774 GO:0005783 GO:0005788 GO:0005886 GO:0009506 GO:0009507 GO:0016020 GO:0016592	cell wall; chloroplast; endoplasmic reticulum; endoplasmic reticulum lumen; mediator complex; membrane; nucleolus; nucleus; plasma membrane; plasmodesma; vacuolar membrane; vacuole
Glyma.05G221900	Only K6	down	AT3G43120	SAUR-like auxin-responsive protein family		GO:0009733	response to auxin stimulus	GO:0005516	calmodulin binding	GO:0005634	nucleus
Glyma.05G222300	Only K6	up	AT2G19570	cytidine deaminase 1		GO:0009972	cytidine deamination	GO:0003824 GO:0004126 GO:0008270 GO:0016787	catalytic activity; cytidine deaminase activity; hydrolase activity; zinc ion binding	GO:0005634 GO:0005829	cytosol; nucleus
Glyma.05G224500	Only K6	up	AT4G26260	myo-inositol oxygenase 4		GO:0006949 GO:0019310 GO:0019853 GO:0055114	L-ascorbic acid biosynthetic process; inositol catabolic process; oxidation-reduction process; syncytium formation	GO:0005506 GO:0050113	inositol oxygenase activity; iron ion binding	GO:0005737	cytoplasm
Glyma.05G224800	Only JY93	down	AT2G19790	SNARE-like superfamily protein		GO:0006301 GO:0006810 GO:0006886 GO:0015031	intracellular protein transport; postreplication repair; protein transport; transport	GO:0008565	protein transporter activity	GO:0005794 GO:0030125	Golgi apparatus; clathrin vesicle coat
Glyma.05G224900	Only JY93	up	AT4G26270	phosphofructokinase 3		GO:0006096 GO:0010053	glycolysis; root epidermal cell differentiation	GO:0003872 GO:0005524	6-phosphofructokinase activity; ATP binding	GO:0005737 GO:0005829 GO:0005945	6-phosphofructokinase complex; cytoplasm; cytosol
Glyma.05G225900	Only K6	up	AT5G56550	oxidative stress 3		GO:0006979 GO:0046686	response to cadmium ion; response to oxidative stress	GO:0003674	molecular function	GO:0005634 GO:0016607	nuclear speck; nucleus
Glyma.05G230400	Only K6	up	AT1G52240	RHO guanyl-nucleotide exchange factor 11		GO:0000226 GO:0007017 GO:0009860 GO:0048364 GO:0080147	microtubule-based process; microtubule cytoskeleton organization; pollen tube growth; root development; root hair cell development	GO:0005089	Rho guanyl-nucleotide exchange factor activity	GO:0005634 GO:0005737 GO:0005875	cytoplasm; microtubule associated complex; nucleus
Glyma.05G230700	Only JY93	up	AT5G21222	protein kinase family protein		GO:0006468	protein phosphorylation	GO:0004672 GO:0004674 GO:0005524 GO:0016772	ATP binding; protein kinase activity; protein serine/threonine kinase activity; transferase activity, transferring phosphorus-containing groups	GO:0005739	mitochondrion
Glyma.05G232300	Only K6	up	AT3G24450	Heavy metal transport/detoxification superfamily protein		GO:0006825 GO:0030001	copper ion transport; metal ion transport	GO:0005507 GO:0046872	copper ion binding; metal ion binding	NA	NA
Glyma.05G236300	Only K6	up	AT1G14870	PLANT CADMIUM RESISTANCE 2		GO:0006979	response to oxidative stress	GO:0003674	molecular function	GO:0005737 GO:0005886	cytoplasm; plasma membrane
Glyma.05G236600	Only K6	down	AT1G14890	Plant invertase/pectin methylesterase inhibitor superfamily protein		NA	NA	GO:0004857 GO:0030599 GO:0046910	enzyme inhibitor activity; pectinesterase activity; pectinesterase inhibitor activity	GO:0005739	mitochondrion
Glyma.05G237200	Only K6	up	AT1G73805	Calmodulin binding protein-like		GO:0000165 GO:0001666 GO:0002237 GO:0006355 GO:0006612 GO:0009581 GO:0009595 GO:0009617 GO:0009627 GO:0009697 GO:0009814 GO:0009862 GO:0009863 GO:0009867 GO:0010112 GO:0010200 GO:0010310 GO:0010363 GO:0031347 GO:0031348 GO:0035304 GO:0042742 GO:0043900 GO:0045087 GO:0045088 GO:0050832 GO:0080142	MAPK cascade; defense response, incompatible interaction; defense response to bacterium; defense response to fungus; detection of biotic stimulus; detection of external stimulus; innate immune response; jasmonic acid mediated signaling pathway; negative regulation of defense response; protein targeting to membrane; regulation of defense response; regulation of hydrogen peroxide metabolic process;…	GO:0003700 GO:0005516 GO:0043565	calmodulin binding; sequence-specific DNA binding; sequence-specific DNA binding transcription factor activity	GO:0005634	nucleus
Glyma.05G239400	Only K6	up	AT1G68050	flavin-binding, kelch repeat, f box 1		GO:0006355 GO:0006511 GO:0007623 GO:0009637 GO:0009911 GO:0010468	circadian rhythm; positive regulation of flower development; regulation of gene expression; regulation of transcription, DNA-dependent; response to blue light; ubiquitin-dependent protein catabolic process	GO:0001047 GO:0004842 GO:0005515	core promoter binding; protein binding; ubiquitin-protein ligase activity	GO:0005634	nucleus
Glyma.05G245200	Only JY93	down	AT1G18170	FKBP-like peptidyl-prolyl cis-trans isomerase family protein		GO:0000413 GO:0006457 GO:0018208	peptidyl-proline modification; protein folding; protein peptidyl-prolyl isomerization	GO:0003755 GO:0005528	FK506 binding; peptidyl-prolyl cis-trans isomerase activity	GO:0009507 GO:0009535	chloroplast; chloroplast thylakoid membrane
Glyma.05G245400	Only JY93	up	AT1G32150	basic region/leucine zipper transcription factor 68		GO:0006351 GO:0006355 GO:0006473	protein acetylation; regulation of transcription, DNA-dependent; transcription, DNA-dependent	GO:0003677 GO:0003700 GO:0043565 GO:0046983	DNA binding; protein dimerization activity; sequence-specific DNA binding; sequence-specific DNA binding transcription factor activity	GO:0005634	nucleus
Glyma.05G245700	Only K6	up	NA	NA		NA	NA	NA	NA	NA	NA
Glyma.05G246500	Only K6	down	AT3G18000	S-adenosyl-L-methionine-dependent methyltransferases superfamily protein		GO:0006656 GO:0008152 GO:0009555 GO:0009826 GO:0009860 GO:0010183 GO:0042425 GO:0048528	choline biosynthetic process; metabolic process; phosphatidylcholine biosynthetic process; pollen development; pollen tube growth; pollen tube guidance; post-embryonic root development; unidimensional cell growth	GO:0000234 GO:0008168	methyltransferase activity; phosphoethanolamine N-methyltransferase activity	GO:0005737 GO:0005829	cytoplasm; cytosol
Glyma.05G247800	Only K6	down	AT1G14700	purple acid phosphatase 3		NA	NA	GO:0003993 GO:0004722 GO:0016787	acid phosphatase activity; hydrolase activity; protein serine/threonine phosphatase activity	GO:0005576 GO:0005773	extracellular region; vacuole
Glyma.05G248000	Only JY93	down	AT1G68090	annexin 5		GO:0009408 GO:0009409 GO:0009414 GO:0009639 GO:0009651 GO:0009827 GO:0009860 GO:0030048	actin filament-based movement; plant-type cell wall modification; pollen tube growth; response to cold; response to heat; response to red or far red light; response to salt stress; response to water deprivation	GO:0005509 GO:0005544	calcium-dependent phospholipid binding; calcium ion binding	NA	NA
Glyma.06G003500	Only K6	down	AT4G35070	SBP (S-ribonuclease binding protein) family protein		GO:0008150	biological process	GO:0003674	molecular function	GO:0005737	cytoplasm
Glyma.06G004900	Only JY93	up	AT2G16630	Pollen Ole e 1 allergen and extensin family protein		NA	NA	NA	NA	GO:0005576	extracellular region
Glyma.06G006400	Only JY93	up	AT4G38840	SAUR-like auxin-responsive protein family		GO:0009409 GO:0009733 GO:0042742	defense response to bacterium; response to auxin stimulus; response to cold	GO:0003674	molecular function	GO:0005886 GO:0009507	chloroplast; plasma membrane
Glyma.06G006500	Only JY93	up	AT4G38840	SAUR-like auxin-responsive protein family		GO:0009409 GO:0009733 GO:0042742	defense response to bacterium; response to auxin stimulus; response to cold	GO:0003674	molecular function	GO:0005886 GO:0009507	chloroplast; plasma membrane
Glyma.06G006700	Only K6	up	AT4G38840	SAUR-like auxin-responsive protein family		GO:0009409 GO:0009733 GO:0042742	defense response to bacterium; response to auxin stimulus; response to cold	GO:0003674	molecular function	GO:0005886 GO:0009507	chloroplast; plasma membrane
Glyma.06G006800	Only K6	up	AT5G18060	SAUR-like auxin-responsive protein family		GO:0009733	response to auxin stimulus	GO:0003674	molecular function	NA	NA
Glyma.06G006900	Only K6	down	AT3G12770	mitochondrial editing factor 22		GO:0080156	mitochondrial mRNA modification	GO:0003674	molecular function	GO:0009507	chloroplast
Glyma.06G007100	Only K6	down	AT4G34760	SAUR-like auxin-responsive protein family		GO:0009733	response to auxin stimulus	GO:0003674	molecular function	GO:0005739	mitochondrion
Glyma.06G007500	Only K6	up	AT4G34710	arginine decarboxylase 2		GO:0006527 GO:0006596 GO:0006612 GO:0006970 GO:0006979 GO:0007165 GO:0008295 GO:0009409 GO:0009414 GO:0009446 GO:0009611 GO:0009620 GO:0009651 GO:0009695 GO:0009723 GO:0009733 GO:0009737 GO:0009738 GO:0009753 GO:0009793 GO:0009863 GO:0009867 GO:0010363 GO:0042538 GO:0048316 GO:0080167	abscisic acid mediated signaling pathway; arginine catabolic process; embryo development ending in seed dormancy; hyperosmotic salinity response; jasmonic acid biosynthetic process; jasmonic acid mediated signaling pathway; polyamine biosynthetic process; protein targeting to membrane; putrescine biosynthetic process; regulation of plant-type hypersensitive response; response to abscisic acid sti…	GO:0003824 GO:0008792	arginine decarboxylase activity; catalytic activity	GO:0005634	nucleus
Glyma.06G012200	Only K6	down	AT4G34530	cryptochrome-interacting basic-helix-loop-helix 1	bHLH	GO:0006351 GO:0009911	positive regulation of flower development; transcription, DNA-dependent	GO:0003677 GO:0003700	DNA binding; sequence-specific DNA binding transcription factor activity	GO:0005634	nucleus
Glyma.06G015100	Only K6	down	AT1G20830	multiple chloroplast division site 1		GO:0010020	chloroplast fission	GO:0003674	molecular function	GO:0009706 GO:0009941	chloroplast envelope; chloroplast inner membrane
Glyma.06G015200	Only K6	down	AT1G20823	RING/U-box superfamily protein		GO:0010200	response to chitin	GO:0008270	zinc ion binding	GO:0009507	chloroplast
Glyma.06G017800	Only K6	down	AT1G20640	Plant regulator RWP-RK family protein	Nin-like	GO:0009877	nodulation	GO:0003700	sequence-specific DNA binding transcription factor activity	GO:0005634	nucleus
Glyma.06G018100	Only K6	up	AT5G42330	NA		GO:0008150	biological process	GO:0003674	molecular function	GO:0005739	mitochondrion
Glyma.06G018700	Only JY93	up	AT1G42430	NA		GO:0008150	biological process	GO:0003674	molecular function	GO:0005575	cellular component
Glyma.06G020800	Only K6	up	AT1G76070	NA		GO:0008150 GO:0010200 GO:0050832	biological process; defense response to fungus; response to chitin	GO:0003674	molecular function	GO:0005634 GO:0005886	nucleus; plasma membrane
Glyma.06G020900	Only K6	up	AT1G20300	Pentatricopeptide repeat (PPR) superfamily protein		NA	NA	NA	NA	GO:0005739	mitochondrion
Glyma.06G022900	Only K6	up	AT1G75890	GDSL-like Lipase/Acylhydrolase superfamily protein		GO:0006629 GO:0019953	lipid metabolic process; sexual reproduction	GO:0004091 GO:0016298 GO:0016746 GO:0016788	carboxylesterase activity; hydrolase activity, acting on ester bonds; lipase activity; transferase activity, transferring acyl groups	GO:0005576	extracellular region
Glyma.06G025300	Only JY93	up	AT1G75580	SAUR-like auxin-responsive protein family		GO:0009733	response to auxin stimulus	GO:0005516	calmodulin binding	GO:0005575	cellular component
Glyma.06G028000	Only K6	down	AT1G75500	Walls Are Thin 1		GO:0000271 GO:0006833 GO:0007389 GO:0008361 GO:0009651 GO:0009750 GO:0009825 GO:0009826 GO:0009834 GO:0009926 GO:0009932 GO:0010015 GO:0010075 GO:0010817 GO:0040007 GO:0043481 GO:0048767 GO:0071555 GO:0090355 GO:0090358	anthocyanin accumulation in tissues in response to UV light; auxin polar transport; cell tip growth; cell wall organization; growth; multidimensional cell growth; pattern specification process; polysaccharide biosynthetic process; positive regulation of auxin metabolic process; positive regulation of tryptophan metabolic process; regulation of cell size; regulation of hormone levels; regulation o…	NA	NA	GO:0005774 GO:0005886 GO:0009705 GO:0016020	membrane; plant-type vacuole membrane; plasma membrane; vacuolar membrane
Glyma.06G029900	Only K6	up	AT1G27620	HXXXD-type acyl-transferase family protein		NA	NA	GO:0016740 GO:0016747	transferase activity; transferase activity, transferring acyl groups other than amino-acyl groups	GO:0005737	cytoplasm
Glyma.06G030400	Only JY93	up	AT1G27680	ADPGLC-PPase large subunit		GO:0009058 GO:0019252	biosynthetic process; starch biosynthetic process	GO:0008878 GO:0016779	glucose-1-phosphate adenylyltransferase activity; nucleotidyltransferase activity	GO:0009507	chloroplast
Glyma.06G030500	Only JY93	up	AT5G66460	Glycosyl hydrolase superfamily protein		GO:0008152 GO:0009845 GO:0009855 GO:0009944 GO:0010014 GO:0010075	determination of bilateral symmetry; meristem initiation; metabolic process; polarity specification of adaxial/abaxial axis; regulation of meristem growth; seed germination	GO:0004553 GO:0016985	hydrolase activity, hydrolyzing O-glycosyl compounds; mannan endo-1,4-beta-mannosidase activity	GO:0005576 GO:0071944	cell periphery; extracellular region
Glyma.06G033100	Only K6	down	AT1G75150	NA		GO:0006270 GO:0006275 GO:0006346 GO:0008150 GO:0016246 GO:0051726	DNA replication initiation; RNA interference; biological process; methylation-dependent chromatin silencing; regulation of DNA replication; regulation of cell cycle	GO:0003674	molecular function	GO:0005634	nucleus
Glyma.06G034700	Only K6	up	AT3G50770	calmodulin-like 41		GO:0008150 GO:0043090	amino acid import; biological process	GO:0005509	calcium ion binding	NA	NA
Glyma.06G035300	Only JY93	up	AT4G31940	cytochrome P450, family 82, subfamily C, polypeptide 4		GO:0010043 GO:0055114 GO:0071281	cellular response to iron ion; oxidation-reduction process; response to zinc ion	GO:0004497 GO:0005506 GO:0009055 GO:0016705 GO:0019825 GO:0020037	electron carrier activity; heme binding; iron ion binding; monooxygenase activity; oxidoreductase activity, acting on paired donors, with incorporation or reduction of molecular oxygen; oxygen binding	GO:0009507	chloroplast
Glyma.06G035400	Only JY93	down	AT4G31940	cytochrome P450, family 82, subfamily C, polypeptide 4		GO:0010043 GO:0055114 GO:0071281	cellular response to iron ion; oxidation-reduction process; response to zinc ion	GO:0004497 GO:0005506 GO:0009055 GO:0016705 GO:0019825 GO:0020037	electron carrier activity; heme binding; iron ion binding; monooxygenase activity; oxidoreductase activity, acting on paired donors, with incorporation or reduction of molecular oxygen; oxygen binding	GO:0009507	chloroplast
Glyma.06G036300	Only K6	up	AT1G47710	Serine protease inhibitor (SERPIN) family protein		GO:0010951 GO:0030162	negative regulation of endopeptidase activity; regulation of proteolysis	GO:0004867 GO:0004869	cysteine-type endopeptidase inhibitor activity; serine-type endopeptidase inhibitor activity	GO:0005576 GO:0048046	apoplast; extracellular region
Glyma.06G036400	Only K6	up	AT5G66850	mitogen-activated protein kinase kinase kinase 5		GO:0006468 GO:0046777	protein autophosphorylation; protein phosphorylation	GO:0004672 GO:0004674 GO:0005524 GO:0016301 GO:0016772	ATP binding; kinase activity; protein kinase activity; protein serine/threonine kinase activity; transferase activity, transferring phosphorus-containing groups	GO:0005886	plasma membrane
Glyma.06G036700	Only K6	up	AT2G15770	Cupredoxin superfamily protein		NA	NA	GO:0005507 GO:0009055	copper ion binding; electron carrier activity	GO:0005634	nucleus
Glyma.06G036800	Only K6	up	AT3G50060	myb domain protein 77	MYB	GO:0006355 GO:0009723 GO:0009751 GO:0010200 GO:0048527	lateral root development; regulation of transcription, DNA-dependent; response to chitin; response to ethylene stimulus; response to salicylic acid stimulus	GO:0003677 GO:0003700 GO:0005515	DNA binding; protein binding; sequence-specific DNA binding transcription factor activity	GO:0005634	nucleus
Glyma.06G037000	Only K6	up	AT2G26530	Protein of unknown function (DUF1645)		GO:0006612 GO:0008150 GO:0009611 GO:0009612 GO:0009646 GO:0009863 GO:0009867 GO:0010200 GO:0010363	biological process; jasmonic acid mediated signaling pathway; protein targeting to membrane; regulation of plant-type hypersensitive response; response to absence of light; response to chitin; response to mechanical stimulus; response to wounding; salicylic acid mediated signaling pathway	GO:0003674	molecular function	GO:0005886 GO:0009507	chloroplast; plasma membrane
Glyma.06G037700	Only K6	down	NA	NA		NA	NA	NA	NA	NA	NA
Glyma.06G038900	Only K6	down	AT5G42700	AP2/B3-like transcriptional factor family protein	B3	GO:0006355	regulation of transcription, DNA-dependent	GO:0003677	DNA binding	GO:0005634	nucleus
Glyma.06G039000	Only K6	up	AT1G47380	Protein phosphatase 2C family protein		NA	NA	GO:0003824 GO:0004722	catalytic activity; protein serine/threonine phosphatase activity	GO:0005739 GO:0005829	cytosol; mitochondrion
Glyma.06G041500	Only K6	up	AT2G25737	Sulfite exporter TauE/SafE family protein		NA	NA	NA	NA	GO:0009507 GO:0016021	chloroplast; integral to membrane
Glyma.06G042300	Only K6	up	AT4G06534	NA		GO:0008150	biological process	GO:0003674	molecular function	GO:0005576 GO:0009506	extracellular region; plasmodesma
Glyma.06G043000	Only K6	up	AT3G16150	N-terminal nucleophile aminohydrolases (Ntn hydrolases) superfamily protein		GO:0006516 GO:0033345 GO:0051604	asparagine catabolic process via L-aspartate; glycoprotein catabolic process; protein maturation	GO:0004067 GO:0016787	asparaginase activity; hydrolase activity	GO:0005737	cytoplasm
Glyma.06G044100	Only JY93	up	AT2G38185	RING/U-box superfamily protein		GO:0007067	mitosis	GO:0008270	zinc ion binding	GO:0005634	nucleus
Glyma.06G045400	Only K6	up	AT1G27730	salt tolerance zinc finger	C2H2	GO:0002679 GO:0006979 GO:0007165 GO:0009409 GO:0009414 GO:0009611 GO:0009612 GO:0009620 GO:0009644 GO:0009651 GO:0009695 GO:0009723 GO:0009733 GO:0009737 GO:0009738 GO:0009753 GO:0009873 GO:0010117 GO:0010200 GO:0015979 GO:0035264 GO:0035556 GO:0042538 GO:0045892	abscisic acid mediated signaling pathway; ethylene mediated signaling pathway; hyperosmotic salinity response; intracellular signal transduction; jasmonic acid biosynthetic process; multicellular organism growth; negative regulation of transcription, DNA-dependent; photoprotection; photosynthesis; respiratory burst involved in defense response; response to abscisic acid stimulus; response to auxi…	GO:0003676 GO:0003700 GO:0008270 GO:0043565	nucleic acid binding; sequence-specific DNA binding; sequence-specific DNA binding transcription factor activity; zinc ion binding	GO:0005634	nucleus
Glyma.06G045900	Only K6	up	AT3G01400	ARM repeat superfamily protein		GO:0008150	biological process	NA	NA	GO:0005737	cytoplasm
Glyma.06G046200	Only K6	up	AT4G37630	cyclin d5;1		GO:0000278 GO:0010440 GO:0042023 GO:0045736 GO:0051726	DNA endoreduplication; mitotic cell cycle; negative regulation of cyclin-dependent protein serine/threonine kinase activity; regulation of cell cycle; stomatal lineage progression	GO:0004693 GO:0005515	cyclin-dependent protein serine/threonine kinase activity; protein binding	GO:0005634	nucleus
Glyma.06G047600	Only K6	up	AT1G58420	Uncharacterised conserved protein UCP031279		GO:0008150	biological process	GO:0003674	molecular function	GO:0005739	mitochondrion
Glyma.06G047800	Only K6	up	AT3G49810	ARM repeat superfamily protein		GO:0016567	protein ubiquitination	GO:0004842	ubiquitin-protein ligase activity	GO:0000151 GO:0005634	nucleus; ubiquitin ligase complex
Glyma.06G049200	Only K6	up	AT4G37750	Integrase-type DNA-binding superfamily protein	AP2	GO:0006306 GO:0006346 GO:0006355 GO:0007276 GO:0009855 GO:0009887 GO:0009944 GO:0009965 GO:0010014 GO:0010051 GO:0010073 GO:0010089 GO:0010492 GO:0016246 GO:0031047 GO:0042127 GO:0044036 GO:0048439 GO:0048519	DNA methylation; RNA interference; cell wall macromolecule metabolic process; determination of bilateral symmetry; flower morphogenesis; gamete generation; gene silencing by RNA; leaf morphogenesis; maintenance of shoot apical meristem identity; meristem initiation; meristem maintenance; methylation-dependent chromatin silencing; negative regulation of biological process; organ morphogenesis; pol…	GO:0003677 GO:0003700	DNA binding; sequence-specific DNA binding transcription factor activity	GO:0005634	nucleus
Glyma.06G049400	Only K6	up	AT4G07960	Cellulose-synthase-like C12		NA	NA	GO:0016757 GO:0016759	cellulose synthase activity; transferase activity, transferring glycosyl groups	GO:0005794 GO:0009506	Golgi apparatus; plasmodesma
Glyma.06G049900	Only K6	down	AT4G37770	1-amino-cyclopropane-1-carboxylate synthase 8		GO:0009058 GO:0009693 GO:0010200 GO:0042218	1-aminocyclopropane-1-carboxylate biosynthetic process; biosynthetic process; ethylene biosynthetic process; response to chitin	GO:0003824 GO:0005515 GO:0016740 GO:0016847 GO:0030170 GO:0042802	1-aminocyclopropane-1-carboxylate synthase activity; catalytic activity; identical protein binding; protein binding; pyridoxal phosphate binding; transferase activity	GO:0005737	cytoplasm
Glyma.06G052000	Only K6	down	AT1G60960	iron regulated transporter 3		GO:0006812 GO:0006826 GO:0006829 GO:0006833 GO:0009624 GO:0010106 GO:0030001 GO:0055085 GO:0071577	cation transport; cellular response to iron ion starvation; iron ion transport; metal ion transport; response to nematode; transmembrane transport; water transport; zinc ion transmembrane transport; zinc ion transport	GO:0005381 GO:0005385 GO:0008324 GO:0046873	cation transmembrane transporter activity; iron ion transmembrane transporter activity; metal ion transmembrane transporter activity; zinc ion transmembrane transporter activity	GO:0005774 GO:0005886 GO:0009507 GO:0016020 GO:0016021	chloroplast; integral to membrane; membrane; plasma membrane; vacuolar membrane
Glyma.06G052100	Only JY93	up	AT2G26080	glycine decarboxylase P-protein 2		GO:0006544 GO:0019464 GO:0055114	glycine decarboxylation via glycine cleavage system; glycine metabolic process; oxidation-reduction process	GO:0003824 GO:0004375 GO:0005524 GO:0030170	ATP binding; catalytic activity; glycine dehydrogenase (decarboxylating) activity; pyridoxal phosphate binding	GO:0005739 GO:0005960 GO:0009507 GO:0009941 GO:0048046	apoplast; chloroplast; chloroplast envelope; glycine cleavage complex; mitochondrion
Glyma.06G052400	Only JY93	up	AT5G11890	NA		NA	NA	GO:0003674	molecular function	GO:0005634 GO:0005886	nucleus; plasma membrane
Glyma.06G052600	Only K6	down	AT4G33040	Thioredoxin superfamily protein		GO:0045454 GO:0048653	anther development; cell redox homeostasis	GO:0009055 GO:0015035	electron carrier activity; protein disulfide oxidoreductase activity	GO:0005737	cytoplasm
Glyma.06G052700	Only JY93	up	AT2G26170	cytochrome P450, family 711, subfamily A, polypeptide 1		GO:0006612 GO:0009611 GO:0009805 GO:0009926 GO:0009934 GO:0009963 GO:0010223 GO:0010363 GO:0016117 GO:0055114	auxin polar transport; carotenoid biosynthetic process; coumarin biosynthetic process; oxidation-reduction process; positive regulation of flavonoid biosynthetic process; protein targeting to membrane; regulation of meristem structural organization; regulation of plant-type hypersensitive response; response to wounding; secondary shoot formation	GO:0005506 GO:0009055 GO:0016705 GO:0019825 GO:0020037	electron carrier activity; heme binding; iron ion binding; oxidoreductase activity, acting on paired donors, with incorporation or reduction of molecular oxygen; oxygen binding	NA	NA
Glyma.06G052900	Only K6	up	AT1G14560	Mitochondrial substrate carrier family protein		GO:0006810 GO:0006839 GO:0055085	mitochondrial transport; transmembrane transport; transport	GO:0005215 GO:0015228	coenzyme A transmembrane transporter activity; transporter activity	GO:0005739 GO:0005743	mitochondrial inner membrane; mitochondrion
Glyma.06G053000	Only JY93	up	AT5G11950	Putative lysine decarboxylase family protein		GO:0009089	lysine biosynthetic process via diaminopimelate	GO:0042803	protein homodimerization activity	GO:0005634 GO:0005737 GO:0005829	cytoplasm; cytosol; nucleus
[truncated: 3,349 more rows]

## Sheet: Expression
The expression levels (FPKM) of DRGs
[truncated: 4,456 more rows]
