# Supplementary material for: Identifying Soybean Pod Borer (Leguminivora glycinivorella) Resistance QTLs and the Mechanism of Induced Defense Using Linkage Mapping and RNA-Seq Analysis
Source: Int J Mol Sci. 2022 Sep 18;23(18):10910. doi: 10.3390/ijms231810910 (PMC9504297; doi:10.3390/ijms231810910)
Supplement: Supplementary file 1 [file ijms-23-10910-s001.zip › Table S6.xlsx]

## Sheet: Table S6
Table S6:Expression levels (FPKM) of candidate genes
If FPKM is equal to 0 then record as 0.001 and used to calculate log2 fold change
The genes marked in red are the differently expressed genes (|log2 fold change|≥1 and p adjust <0.05) between K6E and JY93E
Gene Locus	QTL name	Type	JY93	JY93E	K6	K6E	log2(JY93E_JY93)	log2(K6E_K6)	log2(K6_JY93)	log2(K6E_JY93E)
Glyma.04G097100	qESP-4-1	QTL+K6	8.33543	4.99937	12.674	5.15963	-0.737508	-1.29654	0.60455	0.0455192
Glyma.04G097900	qESP-4-1	QTL+JY93	0.364286	1.68542	0.709414	1.07429	2.20996	0.598681	0.961554	-0.649725
Glyma.04G098000	qESP-4-1	QTL+K6	22.8667	9.04859	8.51407	19.4887	-1.33748	1.19472	-1.42533	1.10687
Glyma.04G098600	qESP-4-1	QTL+CRGs	11.999	5.24031	3.21399	6.91091	-1.19518	1.10451	-1.90047	0.399223
Glyma.04G099000	qESP-4-1	QTL+CRGs	0.967412	3.70206	1.01237	2.96097	1.93613	1.54834	0.0655322	-0.32226
Glyma.04G099200	qESP-4-1	QTL+K6	2.65279	3.65563	1.3583	4.65841	0.462606	1.77803	-0.965708	0.349717
Glyma.04G100200	qESP-4-1	QTL+K6	0.104822	0.250786	0.161291	0.782927	1.25852	2.27921	0.621727	1.64242
Glyma.04G100300	qESP-4-1	QTL+K6	21.921	17.0483	4.40548	29.5115	-0.362682	2.7439	-2.31494	0.791645
Glyma.04G100400	qESP-4-1	QTL+CRGs	4.53911	10.377	1.40984	19.2789	1.19291	3.77342	-1.68688	0.893629
Glyma.09G025100	qESP-9-1	QTL+K6	6.58306	6.78874	2.48871	5.6136	0.0443856	1.17353	-1.40336	-0.274219
Glyma.09G025400	qESP-9-1	QTL+JY93	1.35712	4.15401	5.14992	5.21458	1.61395	0.0179998	1.924	0.328045
Glyma.09G026200	qESP-9-1	QTL+K6	7.09277	5.71182	4.72156	10.1944	-0.3124	1.11044	-0.587087	0.835749
Glyma.09G027000	qESP-9-1	QTL+K6	16.8228	11.0198	5.16771	16.0277	-0.610321	1.63297	-1.70282	0.540471
Glyma.09G027500	qESP-9-1	QTL+K6	2.16933	3.93251	0.507183	4.24944	0.8582	3.0667	-2.09667	0.111824
Glyma.09G027600	qESP-9-1	QTL+K6	0.968361	0.875703	0.323723	1.11318	-0.145103	1.78186	-1.58079	0.346176
Glyma.09G027900	qESP-9-1	QTL+K6	9.05853	15.4534	3.2486	15.2229	0.770577	2.22836	-1.47946	-0.021679
Glyma.09G028000	qESP-9-1	QTL+JY93	4.44422	11.7631	4.82124	8.60926	1.40426	0.836484	0.117475	-0.450305
Glyma.09G030900	qESP-9-1	QTL+K6	3.54939	3.78954	7.95289	3.08622	0.0944492	-1.36564	1.16391	-0.296179
Glyma.09G031700	qESP-9-1	QTL+K6	10.6888	19.0501	8.35978	40.7971	0.833697	2.28693	-0.354569	1.09867
Glyma.09G032100	qESP-9-1	QTL+JY93	0.198632	1.39602	0.148895	0.0602283	2.81315	-1.30578	-0.4158	-4.53473
Glyma.09G033500	qESP-9-1	QTL+JY93	20.0415	7.14363	9.18222	13.4414	-1.48826	0.549769	-1.12607	0.911955
Glyma.09G034300	qESP-9-1	QTL+CRGs	1.29435	5.2233	1.23908	2.93637	2.01274	1.24477	-0.062956	-0.830927
Glyma.09G035700	qESP-9-1	QTL+K6	8.98568	4.64052	0.852032	4.07498	-0.953339	2.25781	-3.39865	-0.187493
Glyma.09G037100	qESP-9-1	QTL+JY93	0.03638	2.07065	0	0	5.83079	0	-5.18507	-11.0159
Glyma.09G038200	qESP-9-1	QTL+JY93	4.19886	10.7124	14.3139	10.3824	1.35121	-0.463276	1.76935	-0.0451391
Glyma.09G040400	qESP-9-1	QTL+CRGs	1.91324	107.617	1.05585	37.3478	5.81374	5.14455	-0.857621	-1.5268
Glyma.09G040500	qESP-9-1	QTL+JY93	15.0251	85.0311	12.6873	19.5602	2.50062	0.624535	-0.24399	-2.12007
Glyma.09G040600	qESP-9-1	QTL+CRGs	26.2304	169.165	54.154	154.704	2.68912	1.51437	1.04583	-0.128923
Glyma.09G041900	qESP-9-1	QTL+CRGs	0.299359	4.09592	0.342742	5.4965	3.77424	4.00332	0.195247	0.424325
Glyma.09G042400	qESP-9-1	QTL+K6	49.5481	50.3491	16.0683	82.1788	0.023137	2.35454	-1.62461	0.7068
Glyma.09G042500	qESP-9-1	QTL+CRGs	0.679023	2.69281	0.659734	3.77205	1.98758	2.51539	-0.0415774	0.486237
Glyma.09G043900	qESP-9-1	QTL+K6	7.4067	7.48258	13.8974	6.18792	0.0147045	-1.16729	0.907913	-0.27408
Glyma.09G044800	qESP-9-1	QTL+K6	19.5369	23.4386	11.3584	43.7192	0.262681	1.94451	-0.782449	0.899384
Glyma.09G045700	qESP-9-1	QTL+K6	45.8965	44.6713	24.1157	66.7432	-0.0390359	1.46865	-0.928412	0.579272
Glyma.09G046400	qESP-9-1	QTL+K6	92.1776	80.9373	94.916	44.5111	-0.18761	-1.09249	0.0422363	-0.862641
Glyma.09G047200	qESP-9-1	QTL+JY93	24.2022	8.48758	15.2352	8.79043	-1.51171	-0.793399	-0.667733	0.0505812
Glyma.09G047900	qESP-9-1	QTL+K6	37.3884	44.4402	95.3564	31.983	0.249275	-1.57603	1.35074	-0.474561
Glyma.09G049200	qESP-9-1	QTL+JY93	0.0282043	0.442809	0.185466	0.592761	3.97269	1.67629	2.71717	0.420767
Glyma.09G050200	qESP-9-1	QTL+JY93	0.482943	1.86314	0.771606	1.17978	1.94781	0.612584	0.676011	-0.659211
Glyma.09G050900	qESP-9-1	QTL+JY93	0.28905	1.29909	1.21396	1.87096	2.16811	0.624061	2.07033	0.526279
Glyma.09G052600	qESP-9-1	QTL+JY93	44.3777	20.7618	33.0127	22.2011	-1.09591	-0.572388	-0.426815	0.0967026
Glyma.09G053400	qESP-9-1	QTL+CRGs	0.306021	0.910208	0.162464	0.869948	1.57256	2.42081	-0.913509	-0.0652666
Glyma.09G053500	qESP-9-1	QTL+K6	0.117187	0.274682	0	0.255763	1.22894	7.99866	-6.87267	-0.102955
Glyma.09G053700	qESP-9-1	QTL+K6	1.21976	3.61085	0.373509	2.7705	1.56574	2.89093	-1.70738	-0.382192
Glyma.09G054100	qESP-9-1	QTL+CRGs	0.194308	0.7588	0.479979	1.97739	1.96538	2.04256	1.30463	1.38181
Glyma.09G054200	qESP-9-1	QTL+JY93	8.90762	25.7264	12.1507	18.8047	1.53014	0.630061	0.447922	-0.452152
Glyma.09G054800	qESP-9-1	QTL+JY93	1.29314	3.72371	3.44042	3.22435	1.52587	-0.0935761	1.41171	-0.207736
Glyma.09G054900	qESP-9-1	QTL+CRGs	1.47575	4.73671	2.55425	7.11201	1.68243	1.47736	0.79145	0.586373
Glyma.09G055700	qESP-9-1	QTL+CRGs	0.910912	3.00446	0.618033	2.16815	1.72172	1.81071	-0.559628	-0.470642
Glyma.09G058900	qESP-9-1	QTL+K6	0.0175377	0.388711	0.012794	0.457058	4.47017	5.15884	-0.454989	0.233681
Glyma.09G060200	qESP-9-1	QTL+CRGs	1.71595	15.0917	1.7332	23.4349	3.13667	3.75715	0.0144323	0.634905
Glyma.09G060700	qESP-9-1	QTL+CRGs	0.784521	7.01918	0.464874	18.9221	3.16142	5.34709	-0.754973	1.43069
Glyma.09G061900	qESP-9-1	QTL+K6	60.4627	82.7128	27.0167	131.556	0.452064	2.28376	-1.1622	0.669499
Glyma.09G062400	qESP-9-1	QTL+K6	0.383673	0.351536	0.255402	1.01281	-0.126206	1.98752	-0.587106	1.52662
Glyma.09G062600	qESP-9-1	QTL+JY93	0.011831	0.578398	0.122596	0.677691	5.61142	2.46671	3.37327	0.228565
Glyma.09G062800	qESP-9-1	QTL+K6	6.77344	5.82265	12.4029	5.45773	-0.218211	-1.18431	0.872723	-0.0933747
Glyma.09G062900	qESP-9-1	QTL+JY93	1.58043	11.4361	0.966407	2.33468	2.85521	1.27252	-0.70961	-2.29229
Glyma.09G063300	qESP-9-1	QTL+CRGs	1.44373	16.4466	1.64675	8.02078	3.50991	2.28412	0.189823	-1.03597
Glyma.09G065000	qESP-9-1	QTL+K6	44.3211	49.7143	18.3595	56.0541	0.16567	1.61029	-1.27146	0.173158
Glyma.09G065900	qESP-9-1	QTL+K6	14.2055	10.2286	3.87064	14.0666	-0.473846	1.86163	-1.87581	0.45967
Glyma.09G067900	qESP-9-1	QTL+JY93	3.71747	1.61552	0.694644	0.754891	-1.20232	0.119995	-2.41998	-1.09766
Glyma.09G068000	qESP-9-1	QTL+K6	39.0751	58.1413	41.4231	87.3319	0.573315	1.07607	0.0841869	0.586944
Glyma.09G068100	qESP-9-1	QTL+JY93	0.512172	1.30351	0.850981	1.13457	1.3477	0.414941	0.732499	-0.200263
Glyma.09G069800	qESP-9-1	QTL+JY93	1635.61	677.165	1031.84	721.83	-1.27225	-0.515491	-0.66461	0.092151
Glyma.09G071600	qESP-9-1	QTL+CRGs	53.2933	132.344	25.7993	278.193	1.31227	3.43068	-1.04662	1.07179
Glyma.09G071800	qESP-9-1	QTL+JY93	302.891	113.01	133.462	81.2564	-1.42235	-0.715873	-1.18237	-0.475891
Glyma.09G072000	qESP-9-1	QTL+CRGs	37.3397	11.4028	7.51954	33.3718	-1.71132	2.14991	-2.31199	1.54924
Glyma.09G072200	qESP-9-1	QTL+K6	2.52325	2.47497	6.56939	2.63067	-0.0278748	-1.32033	1.38047	0.0880203
Glyma.09G075200	qESP-9-1	QTL+JY93	0.338061	2.74108	1.37101	0.864391	3.01939	-0.665483	2.01988	-1.66499
Glyma.09G075500	qESP-9-1	QTL+K6	4.48504	7.22609	4.75341	10.0442	0.688094	1.07932	0.0838422	0.475073
Glyma.09G077600	qESP-9-1	QTL+K6	24.0009	15.9058	8.2676	16.5757	-0.593534	1.00353	-1.53755	0.0595131
Glyma.09G077700	qESP-9-1	QTL+K6	0.354661	10.5117	0.095491	6.14295	4.88941	6.00742	-1.893	-0.774987
Glyma.09G087200	qESP-9-1	QTL+JY93	21.7996	104.641	381.935	119.238	2.26308	-1.67948	4.13096	0.188391
Glyma.09G087300	qESP-9-1	QTL+K6	0.971903	3.9217	10.8281	2.50491	2.0126	-2.11196	3.47783	-0.646724
Glyma.09G094600	qESP-9-1	QTL+JY93	0.0126117	0.58288	0.0128718	0.120136	5.53037	3.22238	0.0294505	-2.27853
Glyma.09G094900	qESP-9-1	QTL+K6	28.0568	20.0153	12.2441	38.5208	-0.487246	1.65355	-1.19627	0.94453
Glyma.09G095800	qESP-9-1	QTL+CRGs	2.86809	1.17108	3.55569	1.33097	-1.29225	-1.41765	0.310035	0.184644
Glyma.09G098400	qESP-9-1	QTL+K6	4.94361	3.98913	1.73152	4.03606	-0.309488	1.22091	-1.51352	0.016872
Glyma.09G099200	qESP-9-1	QTL+CRGs	0.158488	1.10509	0.139967	3.57691	2.80172	4.67556	-0.179293	1.69455
Glyma.09G102100	qESP-9-1	QTL+JY93	2.16545	4.77257	2.96715	5.12032	1.1401	0.787158	0.454409	0.101468
Glyma.09G102900	qESP-9-1	QTL+K6	15.5937	14.7772	27.9797	13.1207	-0.0775864	-1.09254	0.843422	-0.171532
Glyma.09G107100	qESP-9-1	QTL+CRGs	6.61575	32.3177	4.21546	39.2385	2.28835	3.21851	-0.650216	0.279947
Glyma.09G108000	qESP-9-1	QTL+JY93	2.0256	4.4151	2.88438	2.96244	1.1241	0.0385229	0.509916	-0.57566
Glyma.09G109600	qESP-9-1	QTL+K6	19.7121	28.3993	16.1565	37.3646	0.526779	1.20955	-0.28696	0.395814
Glyma.09G111200	qESP-9-1	QTL+JY93	1.67044	5.71487	11.5424	5.72122	1.77449	-1.01255	2.78865	0.00160019
Glyma.09G111300	qESP-9-1	QTL+JY93	3.53101	8.49466	12.4837	10.5502	1.26648	-0.242765	1.82189	0.312646
Glyma.09G111900	qESP-9-1	QTL+JY93	0.418878	2.67091	2.7809	5.72121	2.67273	1.04077	2.73095	1.09899
Glyma.09G113100	qESP-9-1	QTL+JY93	0.312771	0	0	0	-8.28896	0	-8.28896	0
Glyma.09G115100	qESP-9-1	QTL+JY93	10.1897	4.37807	5.36355	2.07441	-1.21875	-1.37049	-0.925851	-1.07759
Glyma.09G115800	qESP-9-1	QTL+CRGs	2.14372	6.77648	1.99468	6.30232	1.66042	1.65972	-0.103957	-0.104652
Glyma.09G116300	qESP-9-1	QTL+K6	0.248816	0.928634	0.256075	1.19858	1.90003	2.22668	0.0414864	0.368139
Glyma.09G118800	qESP-9-1	QTL+CRGs	1.30296	8.32689	3.19531	6.46058	2.67599	1.01571	1.29417	-0.366115
Glyma.09G123800	qESP-9-1	QTL+JY93	733.318	340.574	408.917	461.175	-1.10647	0.173508	-0.842631	0.437346
Glyma.09G124200	qESP-9-1	QTL+JY93	6.05358	0.609028	0.686866	0.17671	-3.31321	-1.95864	-3.13969	-1.78512
Glyma.09G124700	qESP-9-1	QTL+CRGs	0	0.673461	0.207754	1.11773	9.39545	2.42762	7.69873	0.730903
Glyma.09G126400	qESP-9-1	QTL+K6	0.468418	1.5273	6.21949	1.03626	1.70512	-2.58541	3.73093	-0.5596
Glyma.09G127000	qESP-9-1	QTL+JY93	1.34837	3.16362	2.22508	2.4299	1.23035	0.127041	0.722637	-0.380676
Glyma.09G127700	qESP-9-1	QTL+K6	29.5719	51.1873	81.6482	23.7566	0.791561	-1.78109	1.4652	-1.10746
Glyma.09G128400	qESP-9-1	QTL+JY93	1.1418	6.2633	0.728676	0.714766	2.45561	-0.0278065	-0.647964	-3.13138
Glyma.09G130200	qESP-9-1	QTL+JY93	0.119563	0	0.0610353	0	-6.90163	-5.93157	-0.970058	0
Glyma.09G130400	qESP-9-1	QTL+K6	116.562	205.532	37.6262	195.544	0.818268	2.37769	-1.63128	-0.0718661
Glyma.09G130500	qESP-9-1	QTL+K6	37.3824	61.4413	7.12603	68.2363	0.71685	3.25937	-2.39119	0.151332
Glyma.09G130800	qESP-9-1	QTL+K6	0	0.0577459	1.23745	14.6484	5.85165	3.5653	10.2732	7.98681
Glyma.09G130900	qESP-9-1	QTL+K6	32.7625	27.1585	9.53612	20.0471	-0.27064	1.07192	-1.78057	-0.438011
Glyma.09G131100	qESP-9-1	QTL+K6	90.0435	174.516	32.8202	245.684	0.954665	2.90415	-1.45604	0.493447
Glyma.09G131800	qESP-9-1	QTL+K6	11.4617	13.6148	5.38368	14.8404	0.248357	1.46286	-1.09015	0.124352
Glyma.09G131900	qESP-9-1	QTL+K6	2.66044	3.17039	2.09137	11.1592	0.252996	2.41572	-0.347219	1.81551
Glyma.09G134500	qESP-9-1	QTL+K6	55.4764	48.1623	38.6451	82.2387	-0.203969	1.08953	-0.52159	0.771913
Glyma.09G138000	qESP-9-1	QTL+JY93	86.3226	486.813	109.957	208.748	2.49556	0.924825	0.349129	-1.2216
Glyma.09G138100	qESP-9-1	QTL+JY93	6.67531	27.4998	11.7032	22.4629	2.04251	0.940644	0.809994	-0.291875
Glyma.09G142900	qESP-9-1	QTL+CRGs	3.69563	16.2719	9.15944	28.2553	2.13849	1.62519	1.30944	0.796136
Glyma.09G143000	qESP-9-1	QTL+K6	19.5814	15.9414	4.04788	16.6429	-0.296705	2.03967	-2.27425	0.0621214
Glyma.09G143500	qESP-9-1	QTL+JY93	116.577	48.1604	61.4274	72.8488	-1.27536	0.246025	-0.92433	0.597058
Glyma.09G143800	qESP-9-1	QTL+K6	30.0556	18.5621	16.758	40.8391	-0.695273	1.2851	-0.842782	1.13759
Glyma.09G145400	qESP-9-1	QTL+K6	7.78464	5.50753	4.23816	9.79643	-0.499226	1.20882	-0.877194	0.830851
Glyma.09G148700	qESP-9-1	QTL+K6	0.0661941	0.0962383	2.80762	0.572955	0.53991	-2.29285	5.4065	2.57374
Glyma.09G149400	qESP-9-1	QTL+JY93	3.96792	1.56925	9.40801	7.32786	-1.33831	-0.360498	1.2455	2.22331
Glyma.09G150500	qESP-9-1	QTL+JY93	1.83272	4.35624	5.6155	5.49548	1.24909	-0.0311685	1.61542	0.335163
Glyma.09G151400	qESP-9-1	QTL+CRGs	0.0874887	0.658109	0.166396	1.15636	2.91116	2.7969	0.927454	0.813192
Glyma.09G153700	qESP-9-1	QTL+K6	1.26334	1.13148	0.864427	2.40387	-0.159038	1.47554	-0.547431	1.08715
Glyma.09G153900	qESP-9-1	QTL+JY93	6.72832	14.9428	14.1262	13.594	1.15113	-0.055408	1.07006	-0.136485
Glyma.09G155500	qESP-9-1	QTL+K6	31.7305	52.0335	6.30214	68.7958	0.713568	3.44841	-2.33196	0.402881
Glyma.09G156200	qESP-9-1	QTL+JY93	1.87978	0.450395	0.791623	0.213628	-2.0613	-1.88971	-1.24768	-1.07609
Glyma.09G159000	qESP-9-1	QTL+JY93	59.6913	23.9167	31.7362	34.7186	-1.3195	0.129579	-0.911389	0.537689
Glyma.09G160100	qESP-9-1	QTL+CRGs	1.15142	3.35776	0.220167	0.952109	1.54409	2.11253	-2.38674	-1.8183
Glyma.09G160200	qESP-9-1	QTL+JY93	2.19411	4.58907	3.35682	3.78729	1.06457	0.17407	0.61346	-0.277037
Glyma.09G161100	qESP-9-1	QTL+CRGs	0.636154	2.15003	0.399275	2.19603	1.75691	2.45944	-0.671992	0.0305368
Glyma.09G161400	qESP-9-1	QTL+JY93	0	0.0945563	0.0460087	0.241136	6.5631	2.38987	5.52383	1.3506
Glyma.09G163900	qESP-9-1	QTL+CRGs	8.51024	203.09	0.646285	114.764	4.57678	7.47228	-3.71896	-0.823451
Glyma.09G164100	qESP-9-1	QTL+CRGs	1.27772	6.0384	1.13141	4.73951	2.24059	2.06662	-0.17545	-0.349426
Glyma.09G165700	qESP-9-1	QTL+K6	0.00904367	0.217195	0	0.299058	4.58594	8.22428	-3.17691	0.461434
Glyma.09G166700	qESP-9-1	QTL+K6	0	0	16.3389	6.89614	0	-1.24445	13.996	12.7516
Glyma.09G168300	qESP-9-1	QTL+JY93	10.8475	42.5615	93.2522	94.3468	1.97219	0.0168354	3.10378	1.14842
Glyma.09G168600	qESP-9-1	QTL+JY93	0.808391	1.88075	1.79625	2.27413	1.21818	0.340326	1.15187	0.27401
Glyma.09G168700	qESP-9-1	QTL+CRGs	1.26085	2.90849	1.85757	3.7465	1.20587	1.01213	0.559016	0.365271
Glyma.09G170200	qESP-9-1	QTL+K6	1.42853	2.36612	1.04286	2.50225	0.727991	1.26268	-0.453988	0.0806993
Glyma.09G172100	qESP-9-1	QTL+K6	2.2881	5.8785	0.31443	4.95991	1.3613	3.9795	-2.86334	-0.245132
Glyma.09G172500	qESP-9-1	QTL+K6	31.8591	32.1028	7.11892	19.1945	0.010997	1.43096	-2.16197	-0.742008
Glyma.09G173400	qESP-9-1	QTL+K6	68.5536	58.809	28.1399	80.3779	-0.221197	1.51418	-1.28462	0.450763
Glyma.09G179000	qESP-9-1	QTL+K6	4.30255	6.16574	4.13506	9.58006	0.51908	1.21213	-0.0572855	0.635761
Glyma.09G179900	qESP-9-1	QTL+JY93	0.90941	0.180794	0.0802444	0.0664477	-2.33058	-0.272182	-3.50246	-1.44406
Glyma.09G180300	qESP-9-1	QTL+CRGs	145.346	66.6385	117.453	58.3925	-1.12506	-1.00822	-0.307408	-0.190573
Glyma.09G181100	qESP-9-1	QTL+CRGs	0.260018	1.41237	0.0463093	1.51509	2.44143	5.03196	-2.48923	0.101288
Glyma.09G181400	qESP-9-1	QTL+CRGs	4.11336	15.4147	2.26312	27.156	1.90592	3.58489	-0.862002	0.816966
Glyma.09G181600	qESP-9-1	QTL+CRGs	8.34964	29.0082	8.50226	41.942	1.79668	2.30248	0.0261313	0.531933
Glyma.09G182000	qESP-9-1	QTL+K6	4.13506	7.02551	2.48981	10.3183	0.764696	2.0511	-0.731874	0.554532
Glyma.09G182400	qESP-9-1	QTL+K6	0.125308	0.61254	0.150844	0.760794	2.28932	2.33445	0.267575	0.312701
Glyma.09G182600	qESP-9-1	QTL+K6	4.27908	3.23526	5.25025	2.25361	-0.40342	-1.22015	0.295084	-0.521647
Glyma.09G183000	qESP-9-1	QTL+K6	1.76995	1.4113	4.25515	1.56489	-0.326682	-1.44315	1.2655	0.149031
Glyma.09G185100	qESP-9-1	QTL+JY93	9.18375	30.7949	16.988	22.5737	1.74554	0.410122	0.887365	-0.448051
Glyma.09G189700	qESP-9-1	QTL+CRGs	16.5	35.1864	10.1659	44.6346	1.09255	2.13442	-0.698732	0.343143
Glyma.09G189800	qESP-9-1	QTL+K6	5.91353	2.85675	11.266	4.80264	-1.04965	-1.23008	0.929888	0.749454
Glyma.09G190700	qESP-9-1	QTL+K6	2.96958	1.34464	8.86242	2.10373	-1.14304	-2.07475	1.57744	0.645738
Glyma.09G191200	qESP-9-1	QTL+JY93	34.9012	16.3234	21.3138	20.2443	-1.09633	-0.0742704	-0.711491	0.310573
Glyma.09G193700	qESP-9-1	QTL+K6	1.50162	1.16485	1.56644	0.669878	-0.366376	-1.22552	0.0609734	-0.798171
Glyma.09G194100	qESP-9-1	QTL+K6	0.354861	0.224782	0.146005	0.495007	-0.658729	1.76143	-1.28123	1.13893
Glyma.09G194800	qESP-9-1	QTL+CRGs	0.202087	0.932375	0.685385	3.48596	2.20594	2.34657	1.76194	1.90257
Glyma.09G195900	qESP-9-1	QTL+K6	1.07834	3.23047	0.855913	3.1328	1.58293	1.87192	-0.333279	-0.0442912
Glyma.09G196000	qESP-9-1	QTL+CRGs	5.3234	16.5548	3.64817	34.6709	1.63683	3.24848	-0.545178	1.06648
Glyma.09G196400	qESP-9-1	QTL+CRGs	1.30484	4.02547	1.85772	5.60296	1.62528	1.59265	0.509657	0.47703
Glyma.09G196700	qESP-9-1	QTL+K6	4.42891	5.80276	4.06765	8.39522	0.389787	1.04537	-0.122756	0.532828
Glyma.09G196800	qESP-9-1	QTL+JY93	0.397254	1.53773	0.899029	0.76151	1.95267	-0.239505	1.1783	-1.01387
Glyma.09G197000	qESP-9-1	QTL+K6	2.4348	3.42467	3.73102	7.8335	0.492158	1.07009	0.615765	1.19369
Glyma.09G198000	qESP-9-1	QTL+K6	1.88568	2.48259	1.26547	2.66822	0.396759	1.0762	-0.575408	0.104034
Glyma.09G198200	qESP-9-1	QTL+JY93	4.36774	9.20878	10.3784	6.70781	1.07613	-0.62967	1.24863	-0.457169
Glyma.09G198900	qESP-9-1	QTL+JY93	10.1124	50.0821	28.5698	32.8595	2.30816	0.201819	1.49836	-0.607985
Glyma.09G202600	qESP-9-1	QTL+JY93	31.7307	14.3808	12.9292	12.6349	-1.14174	-0.0332141	-1.29525	-0.186727
Glyma.09G203000	qESP-9-1	QTL+K6	5.52073	5.71711	7.14505	3.36566	0.0504267	-1.08605	0.372083	-0.764398
Glyma.09G204500	qESP-9-1	QTL+K6	31.0232	35.2432	17.5314	70.5842	0.183999	2.0094	-0.823406	1.002
Glyma.09G204600	qESP-9-1	QTL+JY93	0.249613	1.11339	0.828961	0.887989	2.15719	0.099238	1.73161	-0.326342
Glyma.09G205000	qESP-9-1	QTL+JY93	21.5366	10.7145	13.0992	14.787	-1.00722	0.174848	-0.717306	0.464763
Glyma.09G205300	qESP-9-1	QTL+K6	81.825	193.04	50.7007	201.603	1.23828	1.99144	-0.690535	0.0626206
Glyma.09G205800	qESP-9-1	QTL+K6	9.87683	5.50325	1.10636	3.92907	-0.843764	1.82837	-3.15823	-0.486097
Glyma.09G207400	qESP-9-1	QTL+CRGs	1.16899	7.70483	0.884245	9.9249	2.7205	3.48854	-0.402744	0.365291
Glyma.09G208200	qESP-9-1	QTL+K6	0.772103	0.976338	0.765198	1.58672	0.338588	1.05214	-0.0129592	0.700596
Glyma.09G210100	qESP-9-1	QTL+JY93	2.55988	10.2133	7.97679	11.5197	1.9963	0.530225	1.63973	0.173655
Glyma.09G210600	qESP-9-1	QTL+K6	3.90948	5.36341	0.550532	6.96669	0.456172	3.66157	-2.82808	0.377322
Glyma.09G211000	qESP-9-1	QTL+K6	10.6785	6.20782	10.8451	4.65324	-0.782547	-1.22074	0.0223409	-0.41585
Glyma.09G211300	qESP-9-1	QTL+JY93	2.44067	6.52479	5.54524	4.49514	1.41866	-0.302882	1.18397	-0.537565
Glyma.09G212600	qESP-9-1	QTL+JY93	33.1888	14.1807	8.16642	9.76572	-1.22676	0.258024	-2.02292	-0.538133
Glyma.09G213100	qESP-9-1	QTL+JY93	1.62565	3.57651	3.61629	4.37725	1.13754	0.275515	1.15349	0.291474
Glyma.09G216000	qESP-9-1	QTL+K6	9.45958	8.34389	2.86687	9.08124	-0.181055	1.66342	-1.7223	0.12217
Glyma.09G216600	qESP-9-1	QTL+K6	41.9323	18.6883	20.1681	6.90664	-1.16592	-1.54602	-1.05599	-1.43608
Glyma.09G216800	qESP-9-1	QTL+K6	4.90525	14.1744	1.52991	5.6405	1.53089	1.88237	-1.68088	-1.32939
Glyma.09G218100	qESP-9-1	QTL+JY93	0.535366	2.48566	2.35376	1.82498	2.21503	-0.367088	2.13637	-0.445749
Glyma.09G218600	qESP-9-1	QTL+CRGs	1.21926	5.58196	0.334391	7.036	2.19476	4.39515	-1.8664	0.333983
Glyma.09G219400	qESP-9-1	QTL+K6	1.91784	3.27839	6.40366	1.55342	0.773506	-2.04345	1.73942	-1.07754
Glyma.09G219800	qESP-9-1	QTL+K6	1.05398	2.601	2.82204	0.293727	1.30322	-3.26419	1.42089	-3.14652
Glyma.09G219900	qESP-9-1	QTL+K6	2.713	4.28008	2.34073	6.43662	0.657752	1.45934	-0.212926	0.588665
Glyma.09G220600	qESP-9-1	QTL+K6	4.54957	4.23224	5.43049	1.47109	-0.104309	-1.88419	0.255352	-1.52453
Glyma.09G221000	qESP-9-1	QTL+K6	1.71904	4.06826	11.2765	4.64998	1.24281	-1.27803	2.71365	0.192811
Glyma.09G221200	qESP-9-1	QTL+K6	2.05058	3.02996	6.52058	1.3794	0.563267	-2.24096	1.66897	-1.13526
Glyma.09G221800	qESP-9-1	QTL+K6	5.67274	8.44515	15.541	2.00656	0.574078	-2.95328	1.45396	-2.0734
Glyma.09G221900	qESP-9-1	QTL+K6	1.27737	3.55543	7.06923	1.52848	1.47685	-2.20946	2.46838	-1.21793
Glyma.09G225400	qESP-9-1	QTL+CRGs	4.00186	8.93649	1.97451	7.00736	1.15904	1.82737	-1.01918	-0.350838
Glyma.09G226700	qESP-9-1	QTL+JY93	3.47169	10.1239	4.93468	8.007	1.54405	0.698308	0.507319	-0.338424
Glyma.09G229300	qESP-9-1	QTL+CRGs	1.07031	5.9922	0.747111	6.30788	2.48505	3.07776	-0.518635	0.0740697
Glyma.09G231400	qESP-9-1	QTL+JY93	0.339158	1.56667	1.18351	1.16654	2.20767	-0.020836	1.80305	-0.425461
Glyma.09G235200	qESP-9-1	QTL+CRGs	0.238942	0.715125	0.23301	1.89581	1.58154	3.02435	-0.0362669	1.40654
Glyma.09G236500	qESP-9-1	QTL+CRGs	12.3074	25.2011	9.32758	20.4125	1.03396	1.12988	-0.399949	-0.304036
Glyma.09G236800	qESP-9-1	QTL+K6	23.0718	11.1385	6.27469	16.4551	-1.05058	1.39092	-1.87852	0.56298
Glyma.09G237000	qESP-9-1	QTL+JY93	0.300524	1.03355	3.53554	1.24704	1.78205	-1.50342	3.55638	0.270905
Glyma.09G237200	qESP-9-1	QTL+K6	1.0861	1.28888	0.754524	2.03057	0.246953	1.42825	-0.525522	0.655772
Glyma.09G238100	qESP-9-1	QTL+CRGs	9.58982	35.9014	3.90257	71.2514	1.90447	4.19042	-1.29708	0.988877
Glyma.09G238300	qESP-9-1	QTL+K6	24.9041	36.2816	15.0065	38.2592	0.542858	1.35022	-0.730792	0.0765687
Glyma.09G239600	qESP-9-1	QTL+JY93	3.98847	12.7422	34.0324	30.3242	1.67571	-0.166441	3.093	1.25085
Glyma.09G240700	qESP-9-1	QTL+JY93	8.1706	2.85618	5.69733	5.71216	-1.51636	0.00375161	-0.520155	0.999952
Glyma.09G241800	qESP-9-1	QTL+CRGs	4.41345	2.05769	6.24246	0.808625	-1.10089	-2.94857	0.500206	-1.34748
Glyma.09G242600	qESP-9-1	QTL+K6	0.959863	2.87927	0.0421227	1.17373	1.5848	4.80036	-4.51016	-1.2946
Glyma.09G242900	qESP-9-1	QTL+CRGs	2.58688	1.2524	3.93701	1.66336	-1.04652	-1.243	0.605886	0.409402
Glyma.09G244100	qESP-9-1	QTL+K6	0.434301	0.147913	0.673649	0	-1.55394	-9.39585	0.633301	-7.20861
Glyma.09G246600	qESP-9-1	QTL+K6	34.1517	54.5513	26.1041	63.5347	0.675654	1.28327	-0.387685	0.219931
Glyma.09G248400	qESP-9-1	QTL+JY93	1.05688	2.68249	1.74375	1.97853	1.34376	0.182235	0.722381	-0.439148
Glyma.09G248600	qESP-9-1	QTL+K6	25.6342	52.3526	27.8172	71.4248	1.03019	1.36045	0.117911	0.448163
Glyma.09G249800	qESP-9-1	QTL+K6	2.18076	2.74454	4.22688	1.72549	0.331731	-1.29258	0.954759	-0.669554
Glyma.09G250700	qESP-9-1	QTL+K6	4.89359	7.43297	3.56824	7.43379	0.603046	1.05888	-0.45568	0.000157984
Glyma.09G251500	qESP-9-1	QTL+CRGs	0.063163	0.580127	0.0702179	1.09502	3.19922	3.96298	0.152759	0.916521
Glyma.09G251900	qESP-9-1	QTL+K6	20.8153	38.6846	19.7108	70.3791	0.894118	1.83616	-0.0786547	0.863388
Glyma.09G253200	qESP-9-1	QTL+CRGs	1.2399	3.17655	0.549095	4.31821	1.35723	2.9753	-1.1751	0.442971
Glyma.09G253500	qESP-9-1	QTL+K6	1.75821	2.30457	0.82019	3.68977	0.390385	2.1695	-1.10008	0.679036
Glyma.09G254800	qESP-9-1	QTL+K6	2.27094	3.56748	2.03437	4.7982	0.651618	1.23791	-0.158705	0.427588
Glyma.09G255100	qESP-9-1	QTL+K6	59.0251	46.542	74.4427	30.7837	-0.342795	-1.27396	0.334802	-0.596366
Glyma.09G256800	qESP-9-1	QTL+JY93	11.7443	28.3043	20.669	23.5598	1.26906	0.188859	0.81551	-0.26469
Glyma.09G257200	qESP-9-1	QTL+K6	2.62112	4.3742	5.67036	2.52375	0.738836	-1.16787	1.11326	-0.793449
Glyma.09G257300	qESP-9-1	QTL+K6	0.272674	0.363397	11.8938	3.31524	0.41437	-1.84303	5.44689	3.1895
Glyma.09G257400	qESP-9-1	QTL+K6	1.75257	1.16149	60.2755	16.8146	-0.593501	-1.84186	5.10403	3.85567
Glyma.09G258000	qESP-9-1	QTL+JY93	7.88288	33.166	6.56003	7.77564	2.07291	0.245259	-0.265021	-2.09267
Glyma.09G259300	qESP-9-1	QTL+JY93	1.99445	0.84079	1.29277	0.765506	-1.24618	-0.755975	-0.625533	-0.135332
Glyma.09G261500	qESP-9-1	QTL+JY93	0.5543	0	0.0669993	0.0306683	-9.11452	-1.1274	-3.04845	4.93868
Glyma.09G262800	qESP-9-1	QTL+K6	3.23486	5.93586	9.38968	4.35165	0.875757	-1.10951	1.53737	-0.447895
Glyma.09G262900	qESP-9-1	QTL+JY93	4.05589	8.37757	2.4074	3.704	1.04651	0.621604	-0.75254	-1.17745
Glyma.09G265500	qESP-9-1	QTL+K6	9.22452	17.1902	6.81241	14.1988	0.898041	1.05954	-0.437308	-0.275813
Glyma.09G266700	qESP-9-1	QTL+JY93	3.44571	9.45718	4.67034	8.61537	1.45661	0.883387	0.438724	-0.134497
Glyma.09G268100	qESP-9-1	QTL+K6	12.633	12.0355	4.75504	12.0685	-0.0698987	1.34372	-1.40967	0.00395085
Glyma.09G269400	qESP-9-1	QTL+JY93	0	0.450278	0.0435567	0.0155007	8.81467	-1.49056	5.44482	-4.86041
Glyma.09G270900	qESP-9-1	QTL+K6	1.5132	5.98838	1.5532	7.83303	1.98456	2.33433	0.037635	0.387403
Glyma.09G273400	qESP-9-1	QTL+CRGs	0.486322	2.17603	1.32062	4.64232	2.16171	1.81363	1.44123	1.09315
Glyma.09G274000	qESP-9-1	QTL+K6	51.6085	53.6882	22.8113	76.6355	0.056998	1.74826	-1.17786	0.513406
Glyma.09G274800	qESP-9-1	QTL+JY93	1.10873	0.392054	0.265178	0.341128	-1.49979	0.363352	-2.06388	-0.200737
Glyma.09G275100	qESP-9-1	QTL+CRGs	2.62082	7.5458	2.50113	10.3748	1.52566	2.05244	-0.0674374	0.459341
Glyma.09G277200	qESP-9-1	QTL+JY93	157.516	61.4087	116.843	77.3991	-1.35898	-0.594183	-0.430925	0.333874
Glyma.09G277500	qESP-9-1	QTL+CRGs	1.4454	0.523466	2.76865	0.490684	-1.4653	-2.49632	0.937719	-0.0933016
Glyma.09G277800	qESP-9-1	QTL+JY93	2.10998	60.7746	3.42633	7.36018	4.84816	1.10308	0.699432	-3.04566
Glyma.09G277900	qESP-9-1	QTL+JY93	0.401076	3.80385	0.818	1.95221	3.24551	1.25494	1.02823	-0.962348
Glyma.09G279000	qESP-9-1	QTL+K6	5.05246	12.638	3.55505	24.1271	1.32271	2.76271	-0.507118	0.932888
Glyma.09G279800	qESP-9-1	QTL+JY93	0	2.07571	0	0	11.0194	0	0	-11.0194
Glyma.09G279900	qESP-9-1	QTL+K6	0.854482	1.41756	1.00492	2.01355	0.730286	1.00267	0.233953	0.506334
Glyma.09G280200	qESP-9-1	QTL+K6	4.58822	5.4749	2.99377	6.83516	0.254899	1.19101	-0.61597	0.320143
Glyma.09G281700	qESP-9-1	QTL+JY93	1.61854	3.74781	1.5543	2.24971	1.21136	0.533471	-0.0584269	-0.736312
Glyma.09G281800	qESP-9-1	QTL+JY93	0.974988	9.65931	2.90532	8.48143	3.30846	1.54561	1.57524	-0.187614
Glyma.09G283400	qESP-9-1	QTL+CRGs	64.0377	20.3989	3.23542	13.8709	-1.65043	2.10004	-4.30689	-0.556427
Glyma.13G051600	qESP-13-1	QTL+K6	2.24792	24.0965	0.280315	32.5969	3.42216	6.86154	-3.00347	0.435913
Glyma.13G051800	qESP-13-1	QTL+JY93	7.84365	2.11487	5.54186	1.65441	-1.89096	-1.74405	-0.501155	-0.354254
Glyma.13G051900	qESP-13-1	QTL+K6	12.8934	19.55	69.4274	27.2353	0.600531	-1.35003	2.42887	0.478311
Glyma.13G053600	qESP-13-1	QTL+K6	10.5543	16.9857	17.3849	35.846	0.686491	1.04398	0.720002	1.07749
Glyma.13G054200	qESP-13-1	QTL+K6	0.688639	0.898192	0.532661	5.33255	0.383275	3.32354	-0.370529	2.56973
Glyma.13G054400	qESP-13-1	QTL+K6	14.2895	20.0417	22.3732	50.1067	0.488057	1.16323	0.646821	1.322
Glyma.13G054600	qESP-13-1	QTL+JY93	0.483311	6.02107	0.499651	0.945355	3.639	0.919937	0.047967	-2.67109
Glyma.13G054700	qESP-13-1	QTL+K6	52.1702	45.5237	63.0211	27.937	-0.196607	-1.17366	0.272609	-0.704442
Glyma.13G056000	qESP-13-1	QTL+JY93	0.680626	2.1062	1.31881	1.6052	1.62971	0.283516	0.954299	-0.391892
Glyma.13G056100	qESP-13-1	QTL+JY93	2.50348	7.84361	16.9081	9.07086	1.64758	-0.898404	2.75571	0.20972
Glyma.13G056200	qESP-13-1	QTL+K6	3.17479	4.16581	2.85936	6.72016	0.391936	1.2328	-0.150969	0.689897
Glyma.13G056600	qESP-13-1	QTL+JY93	13.383	5.28721	4.45433	4.78954	-1.33982	0.104678	-1.58712	-0.142618
Glyma.13G058300	qESP-13-1	QTL+JY93	0	0.0965093	0.0528267	0.0348063	6.5926	-0.601917	5.72319	-1.47132
Glyma.13G059000	qESP-13-1	QTL+K6	1.87571	3.22614	5.65838	2.04006	0.78237	-1.47177	1.59295	-0.661194
Glyma.13G062500	qESP-13-1	QTL+JY93	0.287889	1.24713	1.28241	0.542915	2.11503	-1.24006	2.15527	-1.19981
Glyma.13G062800	qESP-13-1	QTL+K6	0.663119	0.587213	1.25365	0.554335	-0.175384	-1.1773	0.918794	-0.0831258
Glyma.13G065200	qESP-13-1	QTL+K6	13.1887	12.1902	1.98926	11.111	-0.113574	2.48168	-2.72899	-0.133739
Glyma.13G065300	qESP-13-1	QTL+K6	23.6875	26.0708	9.95908	51.8078	0.138307	2.37908	-1.25004	0.990735
Glyma.13G065900	qESP-13-1	QTL+JY93	7.54893	18.2684	12.5767	23.5486	1.27501	0.904888	0.736412	0.36629
Glyma.13G066100	qESP-13-1	QTL+JY93	0.921267	2.92345	1.20118	3.20679	1.66598	1.41668	0.382755	0.133458
Glyma.13G067200	qESP-13-1	QTL+JY93	10.013	2.12421	2.67544	3.63295	-2.23688	0.441364	-1.90403	0.77421
Glyma.13G067400	qESP-13-1	QTL+CRGs	0.969177	0.164795	3.29833	0.360314	-2.55609	-3.19441	1.7669	1.12858
Glyma.13G067900	qESP-13-1	QTL+K6	23.7522	17.1729	5.83217	29.7243	-0.467933	2.34954	-2.02596	0.791512
Glyma.13G068200	qESP-13-1	QTL+JY93	3.44168	1.40637	1.46402	1.1104	-1.29114	-0.398857	-1.23318	-0.340902
Glyma.13G068800	qESP-13-1	QTL+JY93	2.57376	11.4051	3.96968	9.41287	2.14773	1.24561	0.625144	-0.276969
Glyma.13G069200	qESP-13-1	QTL+K6	4.02232	9.18892	3.41385	14.0809	1.19187	2.04427	-0.236629	0.615774
Glyma.13G070300	qESP-13-1	QTL+K6	2.54418	3.71854	1.80197	5.49998	0.547536	1.60985	-0.497625	0.564691
Glyma.13G071900	qESP-13-1	QTL+K6	0.638089	0.831421	0.550436	1.25034	0.381821	1.18368	-0.213184	0.588673
Glyma.13G072800	qESP-13-1	QTL+K6	39.3991	46.2875	21.1764	70.6903	0.232461	1.73906	-0.895707	0.610889
Glyma.13G073900	qESP-13-1	QTL+K6	3.26978	6.06029	2.67244	6.83324	0.890196	1.35441	-0.291033	0.173182
Glyma.13G074500	qESP-13-1	QTL+JY93	4.98323	2.01579	3.31523	2.56032	-1.30574	-0.372789	-0.58797	0.344977
Glyma.13G075100	qESP-13-1	QTL+JY93	10.9346	5.32914	8.02723	7.37625	-1.03692	-0.122013	-0.445926	0.468986
Glyma.13G076200	qESP-13-1	QTL+JY93	3.52157	9.65518	9.06426	8.33955	1.45508	-0.120221	1.36397	-0.211335
Glyma.13G076900	qESP-13-1	QTL+CRGs	1.33172	15.27	0.870183	35.93	3.51933	5.36772	-0.613902	1.23449
Glyma.13G077000	qESP-13-1	QTL+CRGs	0.106966	1.1648	0.0153353	1.90841	3.44486	6.95937	-2.80223	0.712282
Glyma.13G077100	qESP-13-1	QTL+K6	30.0296	34.1652	20.6922	45.1317	0.186142	1.12506	-0.537301	0.401613
Glyma.13G077800	qESP-13-1	QTL+JY93	29.3046	4.74005	25.8138	17.8474	-2.62815	-0.532423	-0.182986	1.91274
Glyma.13G078400	qESP-13-1	QTL+JY93	2.0077	7.03654	18.7395	7.3192	1.80932	-1.35633	3.22247	0.0568184
Glyma.13G081000	qESP-13-1	QTL+K6	36.1114	32.4168	17.8114	5.59096	-0.155715	-1.67163	-1.01966	-2.53557
Glyma.13G082300	qESP-13-1	QTL+JY93	2.73955	6.52113	7.6689	5.28669	1.25118	-0.536654	1.48508	-0.302758
Glyma.13G084000	qESP-13-1	QTL+K6	0.541991	0.281769	2.12612	0.171332	-0.943759	-3.63336	1.97188	-0.717719
Glyma.13G084600	qESP-13-1	QTL+JY93	6.29717	27.5703	6.68069	12.0531	2.13034	0.85133	0.0852934	-1.19372
Glyma.13G085800	qESP-13-1	QTL+CRGs	3.67266	25.6502	2.81583	9.53186	2.80407	1.7592	-0.383264	-1.42814
Glyma.13G087400	qESP-13-1	QTL+K6	0.241131	0.33448	1.2301	0.289127	0.4721	-2.089	2.35089	-0.210213
Glyma.13G087500	qESP-13-1	QTL+CRGs	0.990241	11.3713	0.498355	9.73987	3.52147	4.28866	-0.990606	-0.223419
Glyma.13G088000	qESP-13-1	QTL+K6	1.3897	2.6633	0.536219	1.58628	0.938435	1.56475	-1.37388	-0.747568
Glyma.13G088100	qESP-13-1	QTL+K6	82.9574	74.4015	39.2119	96.1042	-0.157038	1.29331	-1.08108	0.369267
Glyma.13G088400	qESP-13-1	QTL+JY93	0.0339563	0.405227	0.0732685	0.246778	3.57698	1.75195	1.10951	-0.715516
Glyma.13G089200	qESP-13-1	QTL+K6	4.59043	10.7999	24.7034	9.66152	1.23432	-1.35439	2.42801	-0.160695
Glyma.13G089500	qESP-13-1	QTL+JY93	0.174516	1.57995	0.604593	0.460627	3.17845	-0.392366	1.79261	-1.77821
Glyma.13G090300	qESP-13-1	QTL+CRGs	0.404487	2.62512	0.0425893	2.0361	2.69822	5.57917	-3.24753	-0.366576
Glyma.13G090600	qESP-13-1	QTL+K6	0.921854	1.62196	0.311456	1.20194	0.815123	1.94827	-1.56551	-0.432366
Glyma.13G091400	qESP-13-1	QTL+JY93	0.523331	5.18352	0.249119	0.857243	3.30813	1.78287	-1.07089	-2.59615
Glyma.13G092500	qESP-13-1	QTL+K6	16.0861	15.1033	2.8902	10.2095	-0.0909439	1.82067	-2.47657	-0.564951
Glyma.13G093700	qESP-13-1	QTL+K6	0.146848	0.204755	1.20647	0.234078	0.479576	-2.36573	3.0384	0.19309
Glyma.13G093800	qESP-13-1	QTL+K6	22.7194	37.4244	71.985	27.9056	0.720054	-1.36714	1.66377	-0.423426
Glyma.13G094100	qESP-13-1	QTL+JY93	1.40583	6.90428	10.8794	9.11531	2.29606	-0.255231	2.9521	0.4008
Glyma.13G094200	qESP-13-1	QTL+JY93	1.3631	11.9138	5.14098	5.56355	3.12767	0.11396	1.91515	-1.09856
Glyma.13G094900	qESP-13-1	QTL+K6	7.23324	10.4583	0.626458	17.8543	0.531931	4.83291	-3.52935	0.771624
Glyma.13G095000	qESP-13-1	QTL+CRGs	1.82651	6.56103	0.18102	12.3733	1.84483	6.09493	-3.33487	0.915235
Glyma.13G095200	qESP-13-1	QTL+CRGs	0.827052	3.93911	0.315538	10.2097	2.25182	5.01598	-1.39016	1.374
Glyma.13G095300	qESP-13-1	QTL+CRGs	0.0922063	1.16827	0.0723227	0.805975	3.66336	3.47821	-0.350418	-0.535563
Glyma.13G095500	qESP-13-1	QTL+K6	47.8507	29.1906	65.7928	24.01	-0.713035	-1.4543	0.459389	-0.281873
Glyma.13G095700	qESP-13-1	QTL+K6	3.31209	4.81933	0.961245	5.6688	0.54109	2.56007	-1.78477	0.23421
Glyma.13G096200	qESP-13-1	QTL+K6	0.560766	0.602862	2.07735	0.661475	0.104429	-1.65099	1.88928	0.133859
Glyma.13G097800	qESP-13-1	QTL+K6	36.9443	27.1555	45.1458	16.9553	-0.444108	-1.41286	0.289243	-0.679505
Glyma.13G100100	qESP-13-1	QTL+JY93	0.256494	0.897091	1.17642	1.70303	1.80633	0.5337	2.1974	0.924775
Glyma.13G101100	qESP-13-1	QTL+K6	5.85014	10.6955	3.04438	21.9394	0.870455	2.8493	-0.942321	1.03652
Glyma.13G101800	qESP-13-1	QTL+K6	1.73186	0.734798	3.22538	0.777191	-1.2369	-2.05313	0.897148	0.0809215
Glyma.13G102000	qESP-13-1	QTL+K6	7.30735	10.5269	4.37463	12.1742	0.526659	1.4766	-0.740188	0.209749
Glyma.13G102200	qESP-13-1	QTL+K6	3.9086	3.1945	1.55399	4.03364	-0.291064	1.3761	-1.33067	0.336494
Glyma.13G103100	qESP-13-1	QTL+K6	22.896	62.5255	8.54538	41.6335	1.44935	2.28453	-1.42188	-0.586699
Glyma.13G104500	qESP-13-1	QTL+K6	176.029	165.477	306.147	131.104	-0.0891847	-1.22351	0.798413	-0.335912
Glyma.13G104700	qESP-13-1	QTL+CRGs	0	0.400984	0	0.302122	8.6474	8.23899	0	-0.408416
Glyma.13G105700	qESP-13-1	QTL+K6	5.50442	4.73554	11.4567	4.97084	-0.217062	-1.20463	1.05753	0.0699615
Glyma.13G107900	qESP-13-1	QTL+K6	18.7998	17.2542	8.63381	20.9257	-0.123775	1.27721	-1.12265	0.278329
Glyma.13G108500	qESP-13-1	QTL+K6	0.788673	0.401404	1.37999	0.300624	-0.974374	-2.19862	0.807157	-0.417092
Glyma.13G108800	qESP-13-1	QTL+K6	0.961177	2.31643	0.533625	2.07233	1.26903	1.95736	-0.848974	-0.160649
Glyma.13G108900	qESP-13-1	QTL+K6	0.056897	0.154093	0	0.338094	1.43738	8.40128	-5.83028	1.13362
Glyma.13G109700	qESP-13-1	QTL+K6	62.9005	58.1584	33.8645	83.4179	-0.113084	1.30058	-0.893296	0.520369
Glyma.13G109800	qESP-13-1	QTL+CRGs	0.0415013	4.99147	0.01289	6.80157	6.91016	9.04347	-1.68691	0.446404
Glyma.13G110200	qESP-13-1	QTL+JY93	0.024166	0.534088	0.0265597	0.113917	4.46603	2.10067	0.136258	-2.2291
Glyma.13G110700	qESP-13-1	QTL+K6	9.89183	11.763	3.55483	13.6881	0.249951	1.94507	-1.47646	0.218656
Glyma.13G110800	qESP-13-1	QTL+K6	0.111292	0.503645	0.255316	0.727088	2.17806	1.50985	1.19793	0.529724
Glyma.13G111200	qESP-13-1	QTL+K6	3.97448	1.71324	0.429041	1.49232	-1.21404	1.79837	-3.21158	-0.199165
Glyma.13G111500	qESP-13-1	QTL+K6	23.2259	32.5099	19.5174	53.5677	0.485144	1.4566	-0.250972	0.720486
Glyma.13G112000	qESP-13-1	QTL+CRGs	12.8163	43.326	4.57937	95.6549	1.75725	4.38462	-1.48476	1.14261
Glyma.13G113000	qESP-13-1	QTL+K6	3.96681	3.82212	5.88092	2.5256	-0.053607	-1.21941	0.568062	-0.597746
Glyma.13G113800	qESP-13-1	QTL+JY93	0.345124	6.47726	0.815116	0.822989	4.2302	0.0138683	1.23989	-2.97644
Glyma.13G115900	qESP-13-1	QTL+CRGs	29.0347	11.0983	28.8035	13.9371	-1.38744	-1.04731	-0.0115313	0.328602
Glyma.13G116100	qESP-13-1	QTL+K6	27.8767	56.7803	38.1407	127.246	1.02633	1.73822	0.452272	1.16416
Glyma.13G117300	qESP-13-1	QTL+JY93	60.8409	24.2069	21.4775	19.2113	-1.32962	-0.160866	-1.50222	-0.333464
Glyma.13G117500	qESP-13-1	QTL+K6	12.929	24.8994	10.6808	36.6895	0.945504	1.78035	-0.275593	0.559256
Glyma.13G117600	qESP-13-1	QTL+CRGs	3.66932	11.5816	3.21777	18.2613	1.65825	2.50465	-0.189452	0.656954
Glyma.13G118300	qESP-13-1	QTL+CRGs	50.068	23.8887	43.3503	15.7741	-1.06756	-1.45848	-0.207845	-0.598766
Glyma.13G119000	qESP-13-1	QTL+JY93	0.0982199	0.973995	0.722627	0.636187	3.30983	-0.1838	2.87916	-0.614464
Glyma.13G119500	qESP-13-1	QTL+CRGs	6.53883	27.1651	8.81626	27.7869	2.05465	1.65617	0.431134	0.0326499
Glyma.13G119700	qESP-13-1	QTL+JY93	0.751757	0.243934	0.321059	0.208391	-1.62378	-0.623547	-1.22743	-0.227198
Glyma.13G122200	qESP-13-1	QTL+K6	1.62964	4.09683	2.42734	5.30043	1.32995	1.12674	0.574818	0.371601
Glyma.13G123000	qESP-13-1	QTL+K6	0.111026	0.825345	0	0.444992	2.8941	8.79764	-6.79475	-0.891218
Glyma.13G123100	qESP-13-1	QTL+K6	3.92004	5.96819	0.319956	3.02466	0.606425	3.24083	-3.61492	-0.980519
Glyma.13G126000	qESP-13-1	QTL+K6	0.073965	0.590617	0.18657	0.540227	2.99731	1.53385	1.3348	-0.128656
Glyma.13G127000	qESP-13-1	QTL+JY93	4.55752	13.2281	16.5677	14.8485	1.53728	-0.158055	1.86205	0.166713
Glyma.13G127200	qESP-13-1	QTL+JY93	3.80191	11.0425	21.44	11.0213	1.53827	-0.960006	2.49551	-0.00276619
Glyma.13G128200	qESP-13-1	QTL+JY93	0.287259	0.92962	1.16666	1.00345	1.69429	-0.217419	2.02197	0.110257
Glyma.13G129900	qESP-13-1	QTL+K6	0.0117573	0.222632	0	0.324503	4.24303	8.34209	-3.55549	0.543567
Glyma.13G132400	qESP-13-1	QTL+CRGs	5.90602	18.3242	8.76233	19.2339	1.63349	1.13426	0.56913	0.0699003
Glyma.13G132500	qESP-13-1	QTL+K6	5.52107	4.11387	8.8624	2.64914	-0.424451	-1.74217	0.68275	-0.63497
Glyma.13G133100	qESP-13-1	QTL+K6	22.925	15.4411	3.67454	24.5485	-0.570145	2.74	-2.64129	0.668856
Glyma.13G133500	qESP-13-1	QTL+K6	1.52079	1.30729	7.01261	2.20748	-0.218238	-1.66755	2.20513	0.755817
Glyma.13G133600	qESP-13-1	QTL+K6	0.623614	0.768802	2.49098	0.805334	0.301959	-1.62906	1.99799	0.0669752
Glyma.13G136300	qESP-13-1	QTL+JY93	0.863703	9.51339	10.8084	6.56233	3.46135	-0.719874	3.64548	-0.535751
Glyma.13G139500	qESP-13-1	QTL+K6	2.53033	4.40428	0.996151	3.79633	0.799583	1.93017	-1.34489	-0.214303
Glyma.13G143100	qESP-13-1	QTL+K6	6.04856	7.79814	2.91869	14.4572	0.366537	2.30839	-1.05127	0.890586
Glyma.13G144400	qESP-13-1	QTL+K6	10.2767	14.8951	6.46992	15.8409	0.535462	1.29183	-0.667556	0.0888147
Glyma.13G145000	qESP-13-1	QTL+JY93	26.119	69.3117	52.9433	76.1947	1.408	0.525242	1.01935	0.136592
Glyma.13G145300	qESP-13-1	QTL+K6	1.55537	0.963742	0.0372567	0.672843	-0.690537	4.1747	-5.38361	-0.518378
Glyma.13G146100	qESP-13-1	QTL+K6	0.049594	0.623753	0.0310493	0.726761	3.65274	4.54885	-0.675603	0.220505
Glyma.13G147700	qESP-13-1	QTL+K6	0.135609	0.272912	1.52363	0.291651	1.00898	-2.3852	3.48999	0.0958055
Glyma.13G148300	qESP-13-1	QTL+JY93	2.41517	4.90468	3.01733	2.93871	1.02204	-0.0380904	0.321152	-0.738974
Glyma.13G148700	qESP-13-1	QTL+K6	0.077844	0.0294307	0.284697	1.76852	-1.40327	2.63505	1.87077	5.90908
Glyma.13G149700	qESP-13-1	QTL+JY93	1.24328	3.35716	1.90973	3.49532	1.4331	0.872055	0.619221	0.0581807
Glyma.13G151200	qESP-13-1	QTL+CRGs	4.82605	10.8962	8.67795	17.9922	1.1749	1.05195	0.846511	0.723553
Glyma.13G151900	qESP-13-1	QTL+K6	0.269452	0.525938	0.0501053	1.86966	0.964864	5.22167	-2.42699	1.82981
Glyma.13G152300	qESP-13-1	QTL+JY93	1.64042	5.25775	8.83797	4.73952	1.68038	-0.898973	2.42965	-0.149704
Glyma.15G007900	qESP-15-1	QTL+JY93	5.6973	1.86484	1.29967	1.64337	-1.61123	0.338515	-2.13214	-0.182394
Glyma.15G008300	qESP-15-1	QTL+JY93	4.92093	18.7698	17.8812	16.5299	1.93141	-0.113364	1.86144	-0.183338
Glyma.15G008700	qESP-15-1	QTL+JY93	19.5135	39.3098	31.209	30.2254	1.01041	-0.0461985	0.677485	-0.379127
Glyma.15G008800	qESP-15-1	QTL+JY93	16.9671	38.3677	19.9752	45.0012	1.17715	1.17175	0.235474	0.23007
Glyma.15G011500	qESP-15-1	QTL+K6	1.85219	1.30267	0.0708697	2.67394	-0.507763	5.23765	-4.70792	1.0375
Glyma.15G011700	qESP-15-1	QTL+JY93	0	0.106673	0.0447017	0.0944683	6.73706	1.0795	5.48226	-0.175297
Glyma.15G012000	qESP-15-1	QTL+JY93	0.72527	4.7251	2.2294	2.74485	2.70375	0.300076	1.62006	-0.783615
Glyma.15G012600	qESP-15-1	QTL+K6	1.42295	2.22376	3.26099	0.795949	0.644122	-2.03456	1.19643	-1.48226
Glyma.15G012800	qESP-15-1	QTL+K6	7.64577	4.97758	15.9259	6.61557	-0.619217	-1.26744	1.05864	0.41042
Glyma.15G013300	qESP-15-1	QTL+JY93	148.226	60.6146	47.7767	35.5815	-1.29006	-0.42518	-1.63342	-0.768539
Glyma.15G013900	qESP-15-1	QTL+CRGs	3.59617	16.3376	6.79378	29.5583	2.18367	2.12127	0.917754	0.855361
Glyma.15G014500	qESP-15-1	QTL+JY93	0.315697	1.63379	0.75751	0.608561	2.37161	-0.315862	1.26272	-1.42475
Glyma.15G015100	qESP-15-1	QTL+CRGs	8.82144	22.6436	2.58744	41.3271	1.36002	3.99749	-1.76949	0.867984
Glyma.15G015600	qESP-15-1	QTL+CRGs	3.6173	12.9669	3.41635	8.8543	1.84185	1.37392	-0.0824541	-0.550381
Glyma.15G015900	qESP-15-1	QTL+K6	1.84048	2.08019	0.060889	0.80144	0.17663	3.71834	-4.91776	-1.37605
Glyma.15G016800	qESP-15-1	QTL+CRGs	3.54011	21.4203	1.32281	3.95956	2.59711	1.58173	-1.42019	-2.43557
Glyma.15G017000	qESP-15-1	QTL+CRGs	7.25206	38.7355	7.64277	41.9847	2.41719	2.4577	0.0757041	0.116208
Glyma.15G017400	qESP-15-1	QTL+JY93	4.29409	1.43392	2.57697	3.0069	-1.58239	0.222601	-0.736678	1.06831
Glyma.15G018000	qESP-15-1	QTL+K6	8.39256	8.41158	1.28936	6.4052	0.00326558	2.31258	-2.70245	-0.393134
Glyma.15G018400	qESP-15-1	QTL+K6	1.6487	2.35889	6.48452	1.94224	0.516781	-1.73928	1.97567	-0.280387
Glyma.15G019100	qESP-15-1	QTL+K6	1.52549	1.84339	0.450298	2.68195	0.273092	2.57433	-1.76032	0.540919
Glyma.15G019300	qESP-15-1	QTL+JY93	37.1535	78.7001	51.6073	72.769	1.08287	0.49575	0.474078	-0.113042
Glyma.15G019400	qESP-15-1	QTL+K6	3.78171	5.15902	1.56778	4.56327	0.448058	1.54134	-1.27031	-0.177028
Glyma.15G021800	qESP-15-1	QTL+JY93	4.09731	1.24033	0.0618607	0.0110223	-1.72396	-2.48859	-6.04951	-6.81415
Glyma.15G022300	qESP-15-1	QTL+K6	39.9887	30.0612	17.5754	55.7068	-0.41169	1.6643	-1.18604	0.88995
Glyma.15G022400	qESP-15-1	QTL+K6	1.48791	1.59939	0.967514	9.96883	0.104233	3.36507	-0.620936	2.6399
Glyma.15G023000	qESP-15-1	QTL+JY93	1.0703	5.89355	1.62741	3.35118	2.46112	1.04209	0.604564	-0.814467
Glyma.15G023800	qESP-15-1	QTL+JY93	2.4287	9.86963	2.51446	3.45552	2.02281	0.458656	0.0500589	-1.51409
Glyma.15G024300	qESP-15-1	QTL+JY93	0.040447	0.315871	0.165342	0.151861	2.96523	-0.122702	2.03135	-1.05659
Glyma.15G024600	qESP-15-1	QTL+JY93	0.354141	14.2958	0.700015	1.35394	5.33512	0.951707	0.983062	-3.40035
Glyma.15G024800	qESP-15-1	QTL+JY93	2.62068	1.12426	3.06615	5.54424	-1.22097	0.854561	0.226489	2.30202
Glyma.15G026400	qESP-15-1	QTL+JY93	91.2627	370.124	37.4979	210.548	2.01991	2.48926	-1.28321	-0.813863
Glyma.15G026500	qESP-15-1	QTL+CRGs	94.5268	234.525	56.2918	205.119	1.31095	1.86546	-0.747799	-0.193285
Glyma.15G026900	qESP-15-1	QTL+CRGs	0.0998509	0.773502	0.158793	1.72631	2.95356	3.44247	0.6693	1.15821
Glyma.15G027200	qESP-15-1	QTL+K6	11.182	6.74349	5.4983	11.222	-0.729612	1.02927	-1.02412	0.734763
Glyma.15G028400	qESP-15-1	QTL+K6	0.562908	1.75954	0.489627	1.65789	1.64422	1.75959	-0.201217	-0.0858488
Glyma.15G030100	qESP-15-1	QTL+JY93	1.77655	4.61342	3.4611	7.13368	1.37676	1.04342	0.962155	0.628811
Glyma.15G030800	qESP-15-1	QTL+K6	21.0127	24.835	14.0474	29.6216	0.241115	1.07635	-0.580962	0.254274
Glyma.15G032300	qESP-15-1	QTL+K6	1.79048	2.88007	5.16843	2.15453	0.685761	-1.26235	1.52938	-0.418731
Glyma.15G034500	qESP-15-1	QTL+JY93	0.995973	0.334733	0.707402	0.984532	-1.5731	0.476907	-0.493576	1.55643
Glyma.15G036200	qESP-15-1	QTL+JY93	0.792716	0.16912	1.58259	1.32698	-2.22876	-0.254136	0.997411	2.97203
Glyma.15G037800	qESP-15-1	QTL+K6	0.72595	0.796576	2.24646	0.904506	0.13394	-1.31245	1.62971	0.183318
Glyma.15G039400	qESP-15-1	QTL+JY93	7.20086	3.24649	3.55461	4.72366	-1.14929	0.410215	-1.01848	0.541022
Glyma.15G040700	qESP-15-1	QTL+K6	1.95555	2.185	0.406339	3.58419	0.160058	3.14089	-2.26682	0.714013
Glyma.15G041100	qESP-15-1	QTL+K6	0.0884829	0.357608	3.09333	0.895787	2.01491	-1.78793	5.12762	1.32478
Glyma.15G042400	qESP-15-1	QTL+K6	1.61545	1.76837	1.80638	3.86382	0.130479	1.09692	0.161168	1.12761
Glyma.15G043800	qESP-15-1	QTL+K6	4.50784	8.10992	4.86702	11.1203	0.84725	1.19208	0.1106	0.455435
Glyma.15G044200	qESP-15-1	QTL+K6	5.65481	4.19761	2.86063	6.36162	-0.429912	1.15306	-0.983145	0.599827
Glyma.15G044400	qESP-15-1	QTL+JY93	0.59547	1.91708	2.12532	1.5051	1.68681	-0.497821	1.83558	-0.349056
Glyma.15G046500	qESP-15-1	QTL+K6	1.0529	1.25937	0.913873	0.309729	0.258332	-1.56099	-0.204302	-2.02362
Glyma.15G046600	qESP-15-1	QTL+JY93	13.6228	29.2493	24.6256	20.6928	1.10238	-0.251029	0.854136	-0.499274
Glyma.15G049100	qESP-15-1	QTL+JY93	0.133485	0	0.459288	0.281167	-7.06053	-0.707975	1.78272	8.13528
Glyma.15G049300	qESP-15-1	QTL+JY93	0.364418	1.09446	0.434592	0.483815	1.58655	0.154793	0.254067	-1.17769
Glyma.15G050300	qESP-15-1	QTL+K6	2.19378	5.62907	24.8987	4.67339	1.35948	-2.41353	3.50458	-0.268426
Glyma.15G051700	qESP-15-1	QTL+JY93	31.9619	67.962	30.8486	36.5294	1.08837	0.24385	-0.0511467	-0.89567
Glyma.15G052700	qESP-15-1	QTL+K6	0.0545457	0.338495	0	0.331397	2.6336	8.37242	-5.76939	-0.0305768
Glyma.15G054300	qESP-15-1	QTL+CRGs	9.55224	4.12999	6.46215	3.13825	-1.2097	-1.04205	-0.563824	-0.396177
Glyma.15G054600	qESP-15-1	QTL+CRGs	16.6985	82.4035	4.57429	21.5429	2.30299	2.23559	-1.8681	-1.93549
Glyma.15G055700	qESP-15-1	QTL+CRGs	1.63291	5.91289	1.82739	7.42629	1.85642	2.02286	0.162339	0.328779
Glyma.15G055800	qESP-15-1	QTL+K6	4.16401	11.1063	1.73997	24.2128	1.41533	3.79863	-1.25891	1.12439
Glyma.15G056500	qESP-15-1	QTL+K6	3.2326	3.52665	10.5063	4.38656	0.125603	-1.26009	1.70049	0.314794
Glyma.15G059600	qESP-15-1	QTL+JY93	12.8929	6.21837	6.34925	6.37236	-1.05197	0.00524082	-1.02192	0.0352901
Glyma.15G060400	qESP-15-1	QTL+K6	0.82553	2.47417	0.578909	2.80871	1.58355	2.2785	-0.511983	0.182961
Glyma.15G061100	qESP-15-1	QTL+K6	19.6589	27.4437	15.0685	31.0888	0.481293	1.04486	-0.383646	0.17992
Glyma.15G061400	qESP-15-1	QTL+K6	1.18059	1.68036	0.388579	2.61073	0.509267	2.74817	-1.60322	0.635685
Glyma.15G061800	qESP-15-1	QTL+JY93	2.46532	5.27238	6.88852	5.37239	1.09668	-0.35863	1.48242	0.0271093
Glyma.15G062300	qESP-15-1	QTL+JY93	10.7499	52.9125	18.1371	16.5276	2.29929	-0.134069	0.754626	-1.67873
Glyma.15G062400	qESP-15-1	QTL+JY93	147.981	1084.62	66.4213	261.674	2.87371	1.97805	-1.15569	-2.05135
Glyma.15G062700	qESP-15-1	QTL+K6	2.45802	7.12453	0.260919	2.84797	1.5353	3.44826	-3.23582	-1.32286
