# Supplementary material for: Identifying Soybean Pod Borer (Leguminivora glycinivorella) Resistance QTLs and the Mechanism of Induced Defense Using Linkage Mapping and RNA-Seq Analysis
Source: Int J Mol Sci. 2022 Sep 18;23(18):10910. doi: 10.3390/ijms231810910 (PMC9504297; doi:10.3390/ijms231810910)
Supplement: Supplementary file 1 [file ijms-23-10910-s001.zip › Table S7.xlsx]

## Sheet: Table S7
Table S7:Primers used in qRT-PCR
GeneID	Forward primer	Reversed primer
Glyma.04G098000	ATCGATTAAGAAATTTGGCTC	AGGGTGGCGCTTCTGGTGGGA
Glyma.04G100400	CGGACAGAGGAACTCCATCA	CACCCAGATGTAGGCGAACT
Glyma.09G040500	ACCCAAGGAAATGGTGGTCC	CAAGGCAGTGCCCTCAGTTA
Glyma.09G062900	GTTACGGCTGGCTGAAAAAGA	ACACAGTTCCTGCATTCA
Glyma.09G071600	TCGGATGAGGAAACGGCATC	ATGCAAGAAGAAGTCCCGGC
Glyma.09G072000	TCGGATGAGGAAACGGCATC	ATGCAAGAAGAAGTCCCGGC
Glyma.09G128400	GGTGCCATTGATTGCGTGG	AGCTTCGTCCTTAAAAACC
Glyma.09G131900|	GCATGGGATGGTGAGCAAAA	ACATAAGGCTCAGGCAAGCA
Glyma.09G143800	TCCATGCTGGTGTTCACCTC	CACTCTCACCCCGGAATAGC
Glyma.09G149400	GAAGAGGAGTGGTTGACGCA	GCCTTGGATCTTCAGTGGCT
Glyma.09G160100	TGCGGAGAAGATAGACGAGTTA	CAAGTCCTTTTCAGTGTTCCG
Glyma.09G194800	AGCATTCTGTGTATAGAGGTGTCC	CGGAGGAGCCTTTTATCGT
Glyma.09G204500	TTGGTTGAGATGGACGTGAAGATCA	CCATCTTCACCGTTGCTTGT
Glyma.09G241800	CGACGATAATAATGCTGCCGC	TGCGATTGCTCGATGTGGC
Glyma.13G053600	TACATCGACAACGGCTCCAC	ATGATCGCGTAGCGTTCCAC
Glyma.13G054200	CACCGATCAATCCAACCAATT	TCTCACTGTCGCCGTCCACATT
Glyma.13G054400	AAGCCGGGTTCACAGCAAG	ATGATCGCGTAGCGTTCCAC
Glyma.13G054600	CTTGCTGGACTCCAATTTCA	TTTGTGTCAAGCCAGGAAGTT
Glyma.13G076900	AGCCAGATTGCTTGGAACAC	CCAAGGAGTTCCAACCTGTCT
Glyma.13G109800	TTGGAGCGGAAAGAGTTGC	CCTTTTCACTCACTGACTCGGT
Glyma.13G113800	ACAACAAAGCGAAGACAC	TTAGCAAGCGTAGAAGTCG
Glyma.13G118300	GGACGGGTTCTGGTTTCTG	CATCCGAGGTGAGGTTTTGT
Glyma.13G119500	ACCCCGAAACACGGATAAC	TTCATGGGAGGAAAAGGCT
Glyma.15G024800	TCTTCCCAAAGGCCTTGAATCT	CAACCACCCAGGAAGAGGTC
Glyma.15G026400	CCCGTTCTTGGAGGTTCTG	CAAAATCACTGGGCTTCTCAC
Glyma.15G062300	CTCGCTGAAGGGTACGGCGA	CCCAGCCATTGTTACACTTTG
Glyma.18G290800	TCTTACATTGCCCTTGACTACG	CCTCTGGACATCTGAAACGC
